# Supplementary material for: Identification of Differential Gene Expression in Brassica rapa Nectaries through Expressed Sequence Tag Analysis
Source: PLoS One. 2010 Jan 20;5(1):e8782. doi: 10.1371/journal.pone.0008782 (PMC2808342; doi:10.1371/journal.pone.0008782)
Supplement: Table S2 — MMN-1 EST and contig sequences with blastx results. The first tab contains MMN-1 contig sequences and blastx results for each contig. The second tab contains all MMN-1 trimmed ESTs, GenBank and dbEST accession numbers, and also indicates which ESTs formed which contigs. (3.24 MB XLS) [file pone.0008782.s002.xls]

## Sheet: MMN1 contigs and blastx results
Contig ID	Consensus contig sequence	Contig Length	No. of ESTs in contig	Top Arabidopsis protein hit (blastx)	Short_description	Curator summary	Description	% identity	alignment length	mismatches	gap openings	query start	query end	subject start	subject end	e-value	bit score
MMN1.Contig_1	GAAATCAGTAGAAGAAAAAAAAAAGTTCTCAGATTTCCAAAAAGAAAAAGCTTCGAAGAAGGWAAATGGCGGATCAGCTGACCGATGACCAGATCTCAGAGTTCAAGGAAGCCTTCAGCCTCTTCGACAAGGATGGCGATGGTTGCATCACCACCAAGGAGCTTSGGAACCGTGATGAGGTCTCTGGGGCAAAACCCGACAGAAGCTGAGCTCCAAGACATGATCAACGAAGTCGACGCTGACGGGAACGGGACCATCGACTTCCCTGAGTTCCTGAACCTGATGGCGAGGAAGATGAAGGACACTGACTCGGAGGAAGAGCTCAAGGAAGCCTTCAGGGTGTTTGATAAGGACCAGAACGGTTTCATCTCCGCGGCTGAGCTTCGACATGTGATGACT…	729	2	AT3G43810.1	CAM7 (CALMODULIN 7); calcium ion binding	EF hand domain protein encodes a calmodulin. Can functionally complement a yeast CaM mutant.	Identical to Calmodulin-7 (CAM7) [Arabidopsis Thaliana] (GB:P59220); similar to CAM3 (CALMODULIN 3), calcium ion binding [Arabidopsis thaliana] (TAIR:AT3G56800.1); similar to CAM5 (CALMODULIN 5), calcium ion binding [Arabidopsis thaliana] (TAIR:AT2G27030	79.55	44	9	0	66	197	1	44	8e-13	70.9
MMN1.Contig_10	GTGTTTGGGGGTTACAGATCAATGAGTTGGCTCGAAGGTACCCTGGATTGATGTCGCTGAGAAGCGTCGATCTTTCACCGGCGAGTTGGATGGCTGTAGCGTGGTACCCTATTTACCATATACCTATGGGAAGGACCATCAAAGATTTGTCTACTTGTTTCCTCACTTATCACACTCTTTCATCTTCTTTCCAAGGTACTGCTACTACTAACACTTTTGATGTGTTATGTCCAGGGTCGGTCCTAGATATAGACAAGTGAAACATTGGCATATAGTTACCATTTAAAAAAAAATTACAATAAAGATAAATCCACAAATTTGTAAATAATTTTTTAAAAATTAAAATCTACATAATTTAAATTAAAATTTACAATAAACATAATTTGTTAAAAATTAAAA…	1096	2	AT4G03420.1			similar to unknown protein [Arabidopsis thaliana] (TAIR:AT1G03610.1); similar to unnamed protein product [Vitis vinifera] (GB:CAO24103.1); contains InterPro domain Protein of unknown function DUF789 (InterPro:IPR008507)	96.67	60	2	0	15	194	169	228	8e-29	124
MMN1.Contig_100	GGATSACAAAAACCTGAACCATCTGTGGCGCCATGGCAGCCTCTCTCCAATCCGCCACCACATTCCTCCAGTCGGCGAAGATCTCCACCGCTCCTTCTCGTGGGAGTGCTCACCTCCGGTCGACTCAGACCGTCGGCAAATCATTCGGCCTAGAAACTTCCTCTGCTCGCCTCACTTGTTCCTTCCAATCTGACTTCAAGGACTTCGCCGGCAAATGCTCCGACGCTGTCAAGATCGCCGGATTTGCTCTCGCAACCTCTGCCCTCGTCGTCTCGGGAGCAAGTGCAGAAGGAGCTCCGAAGAGACTGACTTACGATGAGATACAAAGCAAGACATACATGGAAGTGAAGGGAACTGGAACTGCCAACCAGTGCCCAACCATTGACGGTGGCTCTGAGA…	784	2	AT5G66570.1	OE33/OEE1/OEE33/PSBO-1/PSBO1 (OXYGEN-EVOLVING ENHANCER 33); oxygen evolving/ poly(U) binding	Encodes a protein which is an extrinsic subunit of photosystem II and which has been proposed to play a central role in stabilization of the catalytic manganese cluster. In <i>Arabidopsis thaliana</i> the PsbO proteins are encoded by two genes: <i>psbO1</	Identical to Oxygen-evolving enhancer protein 1-1, chloroplast precursor (PSBO1) [Arabidopsis Thaliana] (GB:P23321;GB:O81917;GB:Q41998); similar to PSBO-2/PSBO2 (PHOTOSYSTEM II SUBUNIT O-2), oxygen evolving/ poly(U) binding [Arabidopsis thaliana] (TAIR:A	95.51	245	11	0	33	767	1	245	1e-132	469
MMN1.Contig_1000	GAGTTCTCTGAAGATCTCACCAAGCTATATGCTTCCTAAATCTTCTTCTTTGTTTTCTCTAAAACACAACTTGTCTGTGTTGCTCTTTAGTTGGTTTGCTTGAGAGTAGAAAAAGAGTTGTAGACACAAAAACCTTACGGGAGTCCAAACAATCTATATGCTCTCATACTATAACCATTGCCAAGTGTTAATCAATTCATTATCTCTCTCTTGTAAGATTCTCTTCCTTTGTGTGTTTCTAGCCATTGTTTGGGAACTTCTTTAGTCAC	269	1	AT5G65600.1	legume lectin family protein / protein kinase family protein		similar to lectin protein kinase, putative [Arabidopsis thaliana] (TAIR:AT5G10530.1); similar to 117M18_32 [Brassica rapa] (GB:AAZ66951.1); contains InterPro domain Legume lectin, alpha; (InterPro:IPR000985); contains InterPro domain Concanavalin A-like l	52	25	12	0	167	241	3	27	3.7	26.6
MMN1.Contig_1001	GACAAACAAAAAACAAAGCAAACACAAAAAAAAAACATGGCAGCTCAAGCCTCGGAACTCATTTATATCCGCACATACCAACCGCCGCTACCTACTGCGCAAAAACCTCCAACTTTACACAACGACCCACCGCCCCACAACCCTCTCCATCCCCAAAACTCTCCTCCGCGCCGACAAAACATAATCCTCCTCCGCCGACCCCCCCACCTCTCCGAAAGAACAAGATCCCGTGTGATTAACTCCAACCCATCTAGACCCAAACACACCGTCACCGAACTACATGCGAAATACCCCAGGGCTTCTCCGCAAAGACTACGTGGATGAGAACTACCTCATCGAGTGAAACTCTTCCAACGACTAAATCTTTGAAATACCAACCGAACGCTCTCTAATACATGA…	735	1	AT4G02770.1	PSAD-1 (photosystem I subunit D-1)	Encodes a protein predicted by sequence similarity with spinach PsaD to be photosystem I reaction center subunit II (PsaD1)	Identical to Photosystem I reaction center subunit II-1, chloroplast precursor (psaD1) [Arabidopsis Thaliana] (GB:Q9S7H1;GB:Q8L9B6); similar to PSAD-2 (photosystem I subunit D-2) [Arabidopsis thaliana] (TAIR:AT1G03130.1); similar to PSI reaction center s	43.96	182	102	1	101	646	22	202	2e-29	125
MMN1.Contig_1002	GGAACGATGACCATCGAAAGAGCTCGAGTCCCGTTGAGCCGGTGGCAACAAGCGGTGGTGGCGATGGGGTGCGCCGTCGGTGCGTTGATCAATCCTCGTAGAGCGGATCTAATCGCCGCTCTCGGCGAAACCACGGGGAAACCAGCTTTCGAAATGGTTCTTGAGAGGATGAAGAAGAGTCCTGAAGGAAGAGTGAGTTTGCTTATGATTGGTTGAGAAAGCTTGATCCTTTTTTTTGTTGGGTTTGATTCTTGTGAGGTCTCTTTTCACTGTAGGCTATATTGCTGGACCGTCCTCGTGTTGTGTCTGAGCAAGTGAGCCATGCTTGGGATCTACCAGACAACACATTTGGAGCTGCATATGCAAAGTTCATGGGATCTAGAAACTTCTCACCGGATG…	745	1	AT2G03690.1	coenzyme Q biosynthesis Coq4 family protein / ubiquinone biosynthesis Coq4 family protein	Ubiquinone biosynthesis protein COQ4 homolog.	Identical to Ubiquinone biosynthesis protein COQ4 homolog [Arabidopsis Thaliana] (GB:Q9ZPR0); similar to unnamed protein product [Vitis vinifera] (GB:CAO42506.1); contains InterPro domain Coenzyme Q biosynthesis Coq4 (InterPro:IPR007715)	86.36	66	9	0	7	204	1	66	1e-108	112
MMN1.Contig_1003	GAAACTCCGGACCATGATCATTCTCGACAAAACTCTTTATGCCTTTCACTACTTCCTTTCCATCCACGTCCTACCTGGACTCCAATTGCTGATATACACGTAATGTCTGAATGACCATTATCCTTCTCCGCCAAATCCCACTCGATCAAGACCGTCTACTATCACATCCTGCGTTCGCCGAAAAAGTGTCCTCCTCTACCATGTCACCGCCGCTTTGACTTCACCCTCTACTAACTGGTATGGGCCTGGATTCTTATCGAGGAATCAATATCTAAGCCCATTCTATGTTCATCACTTTGACTATTTCTAAGATCATGAACAGTCTCTCTGATGTCCATAATCCAGGATTTATTTTCCTCACCAAACTGGCAATATATTATGACAGCGATCAAGATAGTC…	774	1	AT5G43430.1	ETFBETA; electron carrier	Encodes the electron transfer flavoprotein ETF beta, a putative subunit of the mitochondrial electron transfer flavoprotein complex (ETF alpha is At1g50940) in Arabidopsis. Mutations of the ETF beta gene result in accelerated senescence and early death c	similar to unnamed protein product [Vitis vinifera] (GB:CAO71369.1); contains InterPro domain Electron transfer flavoprotein, alpha/beta-subunit, N-terminal (InterPro:IPR014730); contains InterPro domain Electron transfer flavoprotein, beta-subunit, core;	57.69	26	11	0	674	751	221	246	1e-34	27.3
MMN1.Contig_1004	TAGATGATTCGAATGATTACTATAGTGACTGATTATTTTTTTTACTTGGTGGAGAATGCTGTTTGTAGGTATAAGGAGTTGAATCATATTGTGGATGCATATGAACGTTTTTAAATCTGATGGAGGTGATGTGTCTTGCCATATTTTTGATGAAAAATCTCTTCTCGCCCTTCAAGAACTTTTGGATGCTCCGGTGCTTCATTACCTGATATAACTAAGACTTGAGCTGGTTTTACTTTGGTGGATTCCAAATATCTGGACATTATATGATTCCACTTAGCTTCCTTACTGGAACCGCTGTATTCTGGTGAAGATGGTTTTGAGATCATTGTTCCGTTCTAAAATGCAATTGATTTATCTGAAGATATCTTGAGAGAAGTCCGAGGGGAAGGTAAGGCT…	785	1	AT1G11860.2	aminomethyltransferase, putative		Identical to Aminomethyltransferase, mitochondrial precursor (GDCST) [Arabidopsis Thaliana] (GB:O65396;GB:Q42123); similar to unknown protein [Arabidopsis thaliana] (TAIR:AT1G60990.2); similar to unknown protein [Arabidopsis thaliana] (TAIR:AT1G60990.3);	51.29	271	118	6	13	783	134	387	6e-53	204
MMN1.Contig_1005	GATGGGCTATGCTCGCTGTTCCAGGGATTTTGGTACCAGAGGCTTTGGGATACGGAAACTGGGTCAAAGCTCAAGAATGGGCAGCAGTGCCCGGAGGACAAGCCACTTACTTGGGGAACCCTGTCCCATGGGGTACTTTGCCCACAATCTTGGCTATAGAGTTCTTAGCTATTGCCTTTGTGGAGCACCAGAGGAGCATGGAGGAAGACCCTGAGAAAAAGAAGTACCCTGGAGGTGCATTTGACCCTCTTGGATACTCCAAGGACCCGAAGAAGTTTGAGGAGTTGAAAGTCAAGGAGATCAAGAACGGGCGTCTTGCGTTGTTGGCGTTTGTAGGATTCTGTGTGCAGCAATCGGCCTACCCAGGCACAGGACCGTTGGAGAACCTGGCTACTCACT…	586	1	AT3G54890.1	LHCA1; chlorophyll binding	Encodes a component of the light harvesting complex associated with photosystem I.	similar to LHCB4.2 (LIGHT HARVESTING COMPLEX PSII) [Arabidopsis thaliana] (TAIR:AT3G08940.2); similar to chlorophyll a/b-binding protein (GB:AAA34140.1); contains InterPro domain Chlorophyll A-B binding protein; (InterPro:IPR001344)	96.64	149	5	0	3	449	93	241	8e-84	306
MMN1.Contig_1006	GATCGATCCAGATAGAGAGAGGACAGCGATGGCATTGACGGTGGCGAAGAGTGCGTTGGAGGCGATTAGAGAGAAAGGTCTCGGAGGTTTCCTCAGGATGATCCGAGAAGAAGGCTTTCTGAGATGTCTGCCAGATGGGAACCTCTTGCAAACCAAAATACACAACATAGGAGCAACGCTTATTGGTGTGGACAAGTTCGGTAACAAATACTACCAGAAGCTTGGCAATACTCAGTGCGGTAGACATAGGTGGGTAGAGTACGCATCGAAGGATCGTTACAACGCATCTCAAGTACCAGCAGAATGGCACGGGTGGCTTCATTTCATCACTGATCACACTGGAGATGAGCTGTTGAGTCAGAAACCAAAAAGGTATGGGATTGAGCATAGGGAGAACTT…	706	1	AT3G03100.1	NADH:ubiquinone oxidoreductase family protein		Identical to Probable NADH dehydrogenase [ubiquinone] 1 alpha subcomplex subunit 12 [Arabidopsis Thaliana] (GB:Q9M9M9); similar to unnamed protein product [Vitis vinifera] (GB:CAO62196.1); contains InterPro domain NADH:ubiquinone oxidoreductase 17.2 kD su	93.08	159	11	0	29	505	1	159	5e-89	323
MMN1.Contig_1007	CATTTCTGACTATTTTTATGACGATAATGAAGTGGTCAAGACTTGGTCACATATTACTGACCATTTTTGTAACCAGTTCGGTTGGTTAGTAATTTTTGACCACTTTTTGTCCATTTTTTTAAATCATCATGAAATGGTCAATTAGTGGTTGAAAATATTTTTGACTAATTTATCTGGTCAGGATTTTGGTCAGAATATGTTATGTTTCCTTGTAATGTGTAGCCTCTTCCGAGAAGAGACTTAAAGCATGCGCAGCGGAAGTTCAC	266	1	AT5G67160.1	transferase family protein		similar to transferase family protein [Arabidopsis thaliana] (TAIR:AT5G67150.1); similar to unnamed protein product [Vitis vinifera] (GB:CAO71884.1); contains InterPro domain Transferase (InterPro:IPR003480)	52.63	19	9	0	29	85	361	379	3.7	26.6
MMN1.Contig_1008	GAGAACAAACCCAGTTGAATTTTCCCACAAAGATTTCTCCTTTTTTCTTGAATTAAGCTTCACTGTGAGAAAAGTATGGAGAAAGCCACTGAAAGGTAGAAGATTTTACTTCTTCATCTCTATCCACTTTCTTCTTCTCTTCCGCCTTATAAACCTACTCTTATCTCCGCTGAGAACTGTTGACTACTTATCTTTACCCAATGGCTACTTTTGAACACGACGATGAGAACGGTGTGACATACCTCAATGTCTTTTGTAAACCAAACCGTGAACGGTTCTAAGATACTCTCCCATATAATCTTCTCTCTTCTGTTCTCAAGGAATGTGGTGGAAAGGACTTCTTTGGATCCTACTGAAGTTGGGGATATGTGCTGATGGTACTCTTATAGATCCTGGCTC…	770	1	AT5G48880.3	KAT5/PKT1/PKT2 (PEROXISOMAL 3-KETO-ACYL-COA THIOLASE 1, PEROXISOMAL 3-KETO-ACYL-COA THIOLASE 2); acetyl-CoA C-acyltransferase	Encodes a peroxisomal 3-keto-acyl-CoA thiolase 2 precursor.	Identical to 3-ketoacyl-CoA thiolase 5, peroxisomal precursor (KAT5) [Arabidopsis Thaliana] (GB:Q570C8;GB:O65339;GB:Q9S774); similar to KAT2/PED1 (PEROXISOME DEFECTIVE 1), acetyl-CoA C-acyltransferase [Arabidopsis thaliana] (TAIR:AT2G33150.1); similar to	48.78	41	21	0	198	320	43	83	3e-60	35.8
MMN1.Contig_1009	GACCAACCTACAAAGTTAAGTGATATGTCTGGTACTGAAGAAATGTCAAAAGCTCTCAAAGCCAGTACTCCTGGTTTTTGCGATATGCCATCTACCATCGTTCGAGCTAGCATCGTCCAGGCCTCCACCGTCTATAACGATACTCCCAAAACTATAAAAAAGGCAGGGGAGTTTATTGCGCAGGCAGCTAGTGACGGAGCGCAGCTGGTGGTGTTCCCCGAGGCCTATATCGATGGCTATCCTCGTGGATATAGGTATTGGCATAGGGGTTGACGTTCATAATGAAGCTGGTCATGACTGTTTCCGCACATATCATGCTTCTGTCGTTGTACGTTCTGATCCTGAAGGAGACAATCTGGCTTATATGGCAAGGAACAACGTAATGTACGTGATGATTGG…	781	1	AT3G44320.1	NIT3 (NITRILASE 3)	Nitrilase (nitrile aminohydrolase ,EC 3.5.5.1) catalyzes the hydrolysis of indole-3-acetonitrile (IAN) to indole-3-acetic acid (IAA). It is the only one of the four Arabidopsis nitrilases whose mRNA levels are strongly induced when plants experience sulp	Identical to Nitrilase 3 (NIT3) [Arabidopsis Thaliana] (GB:P46010;GB:O04909); similar to ATNIT1/NIT1/NITI (NITRILASE 1) [Arabidopsis thaliana] (TAIR:AT3G44310.3); similar to ATNIT1/NIT1/NITI (NITRILASE 1), nitrilase [Arabidopsis thaliana] (TAIR:AT3G44310	54.55	22	10	0	441	506	138	159	6.3	28.1
MMN1.Contig_101	GGACCACCATCGTAATCCTCTTCATTGGATTGAAAAAKTTATTTAAAAAAAAAGGAGGATTCTTTACTSTCTACAGGTTTTKATCATATGGAAGATCCTAAGGAGAACAAGAACTCGCCRTGGCTRTCAGTACCGCAGTTTGGAGATTGGGATCAGAAAGGMGGAAGYATTCCTGATTACTCTATGGATTTCTCTAAGATCAGAGAGATGAGGAARCAGAACAAGAGAGATCCTTCTCGTGCCAGTCYTGGCAACGAAGAAGAACTCATCAACCCWTTTCATAATCARCCTGCTTCGGTTGATAATACYAAGCCTAAGCTCACCACYGTTCACAGTGACAACAAYAAAACSCACAATGAGTTTTCTCACCACCATCCACATCCTCCTTCTGCGAGGAGA…	740	2	AT5G64850.1			similar to unknown protein [Arabidopsis thaliana] (TAIR:AT5G09960.1); similar to 80C09_15 [Brassica rapa subsp. pekinensis] (GB:AAZ41826.1)	85.47	117	16	4	88	435	1	114	3e-45	178
MMN1.Contig_1010	GATGACTTTCTCCTTCCTCACTTTCAAAATTCTCTTGTGTCTTCCTTGATAGTAAAGAATCAAGAAACAACAAAGGGAAGGAAAAAAAAAACACATATCCATGGCTGCTCTTGTGTATTCCTCTCGAGAGTAAAAGAAAAAAGAAAAAAAAAGAGGGAGAAAACCTTATTCATGGCAGCTCCTAGATCAAGAAGATGCTTTCTTTCTCTGTTAACCCTTTTTTCAATCTCTCTTATTCTGTTTTCTTTTTCACTTTTTGTCTACACAAAGCCCTCTAACAAGCCTTTCATAGATTACAAAAACCAATTTTCTGTCTCTTTATCTTTTCTTGCTCCTCCTCTGTCTCTTCCCGAACAAAACAACTCAACAAACAATACTCTTGATTCAGTCTCTAGTCCT…	753	1	AT5G33290.1	XGD1 (XYLOGALACTURONAN DEFICIENT 1); catalytic		similar to catalytic/ transferase, transferring glycosyl groups [Arabidopsis thaliana] (TAIR:AT3G42180.1); similar to exostosin family protein [Capsella rubella] (GB:ABA18105.1); contains InterPro domain Exostosin-like; (InterPro:IPR004263)	55.31	179	79	4	172	705	1	151	1e-20	96.7
MMN1.Contig_1011	GACAGAAGACTCAATATAAAGAATCTGAAGATGAAGAATCCAAAAAATGGGATCTCAAGTGAAGAAGACGACTCTGCTACTATACTTGTCACAGCTTCAGCAACATGCACTAAAGACAAAGGTGATTACTGCTGGAGTTTTGTCTGGTGTGATTGATGTTGTTGCACGAAAAATCTCTGGAATACAGAAGATTCTGATGAGAACGGTTCTTCTCTGACTGATATTTGCATGGGTGGATCATTGATCAGGAGGGCGTTTCTTTCAGACAATTCTAGATGAGATTATTTGTGGGAAAAAAGACACAGAGACGGTCGCTGTAGTTGGTAAATCTTGGAATAACTAACATTATCACCATTGAAACAGTTGCTTATCATGATCGATTATGGAGTAGACATTATT…	759	1	AT4G04470.1	PMP22 (peroxisomal membrane protein 22)	22-kD peroxisomal membrane protein, an integral membrane protein embedded in the lipid bilayer.	Identical to Peroxisomal membrane protein PMP22 (PMP22) [Arabidopsis Thaliana] (GB:Q9ZS51); similar to unknown protein [Arabidopsis thaliana] (TAIR:AT4G14305.1); similar to hypothetical protein [Vitis vinifera] (GB:CAN70890.1); contains InterPro domain M	74	50	13	0	420	569	125	174	3e-37	83.6
MMN1.Contig_1012	CGCGCCTCCCTCTCCTCCTCCAATCTCACCGCGCCGCAGCCGCTGTCTCTCACCTCCACACATCGCTTCCCGCTCTCTCCCCCGCGACGACACCGACTTCCTACACCAGACCAGGTCCTCCTTCGACATCCGCTCCTCCGCCGGGTCTCTCGAAGACGGCGGAGTTTGTGATCTCCAAGGTTGATGATCTCATGAACTGGGCTCGTAGGGGATCGGTCTGGCCCATGACCTTCGGGCTCGCCTGCTGCGCCGTGGAGATGATGCATACCGGTGCGGCTCGCTACGATCTGGACCGATTCGGAATCATCTTCAGGCCGAGTCCTCGCCAATCGGATTGTATGATTGTCGCCGGGACGCTTACTAACAAGATGGCTCCCGCTCTTCGCAAGGTGTATGACC…	726	1	AT5G11770.1	NADH-ubiquinone oxidoreductase 20 kDa subunit, mitochondrial		Identical to NADH-ubiquinone oxidoreductase 20 kDa subunit, mitochondrial precursor [Arabidopsis Thaliana] (GB:Q42577); similar to NADH-ubiquinone oxidoreductase 20 kDa subunit, mitochondrial precursor (Complex I-20kD) (CI-20kD) (GB:P42027); contains Int	94	200	10	1	3	596	11	210	3e-91	325
MMN1.Contig_1013	GAAATCAATGGCGTCGTTAGCCTCATCTCTGCAATCTCTGAAGATCTCCTCCTCCCCATTCACCCATGGCTCCACTCCACTCTCTTCTCTCTCCAAACCCATTTCCTTTCCGAACACTAGGAAGCCTGGTCTAGTCCCGGGGATAAGAGCCATGAAGACGATGCAAGGACGCGTCGTGTGCGCAACGAACGACAAGACGGTGGCGGTGGAAGTGACGAGGTTGGCTCCACACCCGAAGTACAAGAGGCGAGTGAGGATGAAGAAGAAGTATCAGGCGCATGACCCTGATAACGTATTCAAGGTGGGTGACGTTGTGAGGCTTGAAAAGAGCAGACCCATCAGTAAGACTAAGTCTTTCGTCGCACTTCCTGTTCTCAAGAGGAATGATCTTGGGATTCC…	605	1	AT1G79850.1	RPS17 (ribosomal protein S17); structural constituent of ribosome	nuclear-encoded 30S chloroplast ribosomal protein S17	Identical to 30S ribosomal protein S17, chloroplast precursor (RPS17) [Arabidopsis Thaliana] (GB:P16180); similar to unnamed protein product [Vitis vinifera] (GB:CAO45891.1); contains InterPro domain Nucleic acid-binding, OB-fold (InterPro:IPR012340); co	80.3	132	16	1	56	421	18	149	7e-45	176
MMN1.Contig_1014	GAATAAAATACCTGACGTGACTTTCTTTATAAATCTATCACTTGTATCTATATAAATGATATAAATGATCCAATCTAACCGTTTGAGATCTAAAAAACAACCTTTAAATTCATGTCCGAATAGAATAAAAATGGTTAAAACAAGTTGGAAATACCGTATCTCACAACAAACTGATTCATGATAAAATTCCTTTATATATTAAAATTTTTTACTGGGTAAGACGATTAAATGGTGTATATTGTTAATAGCTTGTATGATTAAAACACATGACCTATTGCTCTTCAATTGGCTGTTTTTGCGTTAAATATTACTTCATTAATCTTACTGATAAGTGCACCCTTAGCATTTGCCTCTCCTGATGCGAGGACTAATCACAGAAATGTTGTATATTCTGGTACA…	712	1	ATCG00300.1		encodes PsbZ, which is a subunit of photosystem II. In Chlamydomonas, this protein has been shown to be essential in the interaction between PS II and the light harvesting complex II.	Identical to Photosystem II reaction center protein Z (psbZ) [Arabidopsis Thaliana] (GB:P56790); similar to photosystem II protein Z [Astragalus douglasii] (GB:ABY52010.1); similar to hypothetical protein LomaCp017 [Lobularia maritima] (GB:YP_001123722.1	68.52	54	17	0	274	435	3	56	1e-12	70.5
MMN1.Contig_1015	GCCAAGAGTACCTATGTATACTTTTGTTTCTATGAAGTCAAGGAAGTGAAAATAATTCGAATCCAACCAAGTAAAGAGGATGTTTCAAAAAAAAAGATCAAATTAGTCTTCCCTAATGAATATGCTCTTTTTAAAGATTACAGTCTATGTT	151	1	no significant hit
MMN1.Contig_1016	CGTTGTTGGGTGAGCCACATGAGGAAAACCGATTTCCGGGTATTTCCCCGGTTATTNCGACCCGATTTTTTTTNNNGCCCCCCTTATTAAGAAAAANCGGTTTTACCCCTTTTTATAGCACCTTTTATAAAATTTTATCAGGCCCCCTTAAGGGACATTTGCGGGAAAATGCGCCTATTGGGGGGGGAGAGAAGAAAATACACCTTCCCAAAAAGATTAACCGGTAAGTGTTTGTGGGATAGATCGTTTGAGATCGCATGCTGGATTCCTCACGTATGGATCATGAGCGTGGCACACGAGATAGAATAATGAAAGAACAAACTCTATGTTACAGCTTACAAAAACGAGGCCGACAAAGGGGAGACTTGCTAGCTTTGAGAGTTGAGAATTGGGTATCTA…	963	1	AT1G13270.1	MAP1C (METHIONINE AMINOPEPTIDASE 1B); metalloexopeptidase	Encodes a methionine aminopeptidase formerly called MAP1B, renamed to MAP1C.	Identical to Methionine aminopeptidase 1B, chloroplast precursor (MAP1B) [Arabidopsis Thaliana] (GB:Q9FV52;GB:Q9FX70); similar to MAP1B (METHIONINE AMINOPEPTIDASE 1C), metalloexopeptidase [Arabidopsis thaliana] (TAIR:AT3G25740.1); similar to unnamed prot	43.48	46	26	1	37	174	95	136	1.7	30.4
MMN1.Contig_1017	GGACCGAACACGGAAACAAAACACGAAGTTTAAGAGTTTCATTTGAGGTTAAAAGGTTCCAGATTTCGAAAGAATTTTTTTTTTTTTTTTTTTTTAATTTTGGGTTCCAGAATCATTTCTAGATCAAGAACCATTGGTGTTGAAGGAAGTTTAAAGATGTCGGATCATTTGAGTTTTGTACCGATCGTCTGATAACGGCTGAGAGCTTGGAGTCAGAAAAGGATTCTGGAGAAAGTTCCAGGCCTCAAGGCAAAGATGTGGCTTCTTCTTCGTCTGGGGATGAAGGTGAAGATGCTAGGAAGTACTATGCTGTTGTTGCAGAAGAGGAACCGCTTCTCCAAGCTGTTGAGTGCCGTATTTGCCAGGAGGAAGATATCACTAACAACTTGGAGACTCCTT…	725	1	AT3G47550.6	zinc finger (C3HC4-type RING finger) family protein		similar to zinc finger (C3HC4-type RING finger) family protein [Arabidopsis thaliana] (TAIR:AT5G62460.1); similar to unnamed protein product [Vitis vinifera] (GB:CAO64548.1); contains InterPro domain Zinc finger, RING/FYVE/PHD-type (InterPro:IPR013083); c	85.56	187	23	3	177	725	8	193	3e-82	301
MMN1.Contig_1018	AAGCAGTGGTATCAACGCAAAGGGGCCATTACTGCCGGGGGATTCCCTTAATAACGGCGAGCGAACCGGGAAGAGCCCAGCTTGAAAATCGGACGTCTTTGGCGTTCGAATTGTACTCTGGAGAAGCGTCCTCACCGACGGACCGGGCCCAAGTTCCCTGGAAAGGGGCGCCAGATAGGGTGAGAACCCCGTCGTGCCCGAGACCCTGTCGCACCACGAGGCGCTGTCTACCATTCGGGTTGTTTGAGAATGCATCCCCAATCGGGCGGGAAATGCCGTCCAAGGGTAAATATGGCGCCAGAGACCGATAGCGAAAAACAATCATTATAAACTCAACAAAAAATCATGTTTCGGTAGA	358	1	AT2G21800.1			similar to unknown protein [Arabidopsis thaliana] (TAIR:AT2G22140.1); similar to unnamed protein product [Vitis vinifera] (GB:CAO71735.1)	35.14	37	24	0	56	166	70	106	1.3	28.1
MMN1.Contig_1019	AAAATATTTTTATATTGGGGGGGGCTTGCTCCCCCCCCCCAACCAACCAACCCCCGCAGGTAATGAAGGAAGAAAGCGGCCCCCTAATTTCTTTTAATATAATTTTTCCAAATTATTCATCCGCCGGCCCCGACATTTTCCCGGGAAATTCGCCCTTTATGCCGGGGGAGCATACCTATTAACCCGAAAATCTCCTTTCTTAATCTCAAATATCGAGTTTCTCTTATGTATCCTATTGTGTCGATGAAAGAGAACGAAAGGAAAATAATGAACCCACGAAACAAAACCAGCATCAAGTAAGATAACATAAGAGACGTGGATTCCTAGAAAGCCTAATTTGGACAATGACCCAGGATTCTAACTTTTTCTCCCGAAGAATCCACACACCCTAACCAACGA…	990	1	AT3G44340.2	CEF (CLONE EIGHTY-FOUR); transporter	homologous to yeast and animal Sec24 proteins; expression in yeast cells enhances their survival under oxidative stress conditions.	Identical to Protein transport protein Sec24-like CEF (CEF) [Arabidopsis Thaliana] (GB:Q9M291); similar to sec23/sec24 transport protein-related [Arabidopsis thaliana] (TAIR:AT4G32640.1); similar to sec23/sec24 transport protein-related [Arabidopsis thali	36.96	46	26	2	36	164	118	160	1.4	30.8
MMN1.Contig_102	GGGGGAGAAGAATCGAAGATGGGAGATTCGAGGTCGTTTGCGGATGGAATCAAGGGGTTCTGGGAGGAGAGGTTGTCGTTCCTGGAGAATTACACGAGGTTCACCAAACGCGACACGCCTCTTCCTTCTTGGTCTTCCTCCGACGTCGAGGAGTTTATAGCTTCCGATCCCGTTCATGGACCCACCTGAAAACAGCTAGGGAAGCTGCGACTTTTGGTGTTACTGGAGCTGCACTTGGAGCTCTATCTACTGCTGCTTTTGCCTGGAGATACTCTAAGAGTCCACACGGTGCTGCATTGTCCTTCTTAGGAGGCGGTGTTTTTGGTTGGACCTTTGGGCAAGAAGTTGCGAACCACACCTTGCAGCTCTATAAGCTGGACACAATGGCTGCTCAAGTTA…	683	2	AT1G08480.1			similar to unknown [Populus trichocarpa] (GB:ABK92625.1)	77.42	62	10	1	19	192	1	62	4e-56	100
MMN1.Contig_1020	GACAAGACATAAAGCAATCAAAAGAAGAAGAAACAAAAACAAACTACAACTTTAAATCAAAGAGAAGAGAAGCAATGGCAGGTTCTAACTGTGGATGTGGTTCCGGTTGCAAATGTGGTGACTCTTGCAGTTGCGAGAAGAACTACAACACGGAGTGCGACAACTACAGCTGCGGATCAAACTGTAGCTGTGGGGACAGCTGCAGCTGTTAATGTGGTGTAAATCACATTGCAGGAAAACTGGTGGAAGATGTGTTTGATGTTAAGAGAGATGGGTGTGTGTTTGAATAAAGATTTGGGATAATATGTTGGCTAAAAAACCCTCTTAAACCTTGAACTCCTCCCGGCTCCCAAGGGGTGGAATGGGGGAATTGGGGAAAGGGTTTTCATTTGGAACCTT…	443	1	no significant hit
MMN1.Contig_1021	AACATCTGAATCATGGGCAATTTGCTCCGCCATTATTTGCATTATGCAAGTTGGCGTTAAAATCTTAATTACGATAGATCACCTAAGGTAAGTTTTTATATGTGTATGCC	110	1	no significant hit
MMN1.Contig_1022	GATCCTCCCACACCTCCTCATCCTATCTCCCTATTCATGGCTAATGTTCCTCAAATATCTTCTTCAATCCTCCTTACGCTCTGCTTCACTCTCTTCACGACTCCGACCCTCTCAGACTACCTTATCCCCTTCCCAGACTTCTGTGTACCTGATCTCCATCCTACCCCATCCAATCACTGGATACCCATGCGAGTCACAATTCACCTATCAAGACTTCTTCTACTCCCCCTTATGTACTCCCCTCAACACTTCAAACCCTAACGGTGTAGCCGCTAATATAGCTAACCTCATGACGTTTCCAGGACTTAACACGATGGTAATCTCCATGTACAACGCTGTCGTGGACACAAGAGTAGATAACCCGACTCACTCTCATCCAGCTGTGACCAATGCTAGCAT…	795	1	AT1G74820.1	cupin family protein		Identical to Germin-like protein subfamily T member 3 precursor [Arabidopsis Thaliana] (GB:Q9S772;GB:Q1PFD3); similar to germin-like protein, putative [Arabidopsis thaliana] (TAIR:AT1G18980.1); similar to germin-like protein [Ananas comosus] (GB:AAM28275.	52.33	172	82	0	176	691	55	226	3e-46	172
MMN1.Contig_1023	GCAACAAGGAGATTAAGGAAAACATTTGCACAACCTTCAAAGGAGAGTTTCCCATCTTTGACAAGATTGAAGTGAATGGAGAGAATGCTTCACCTCTATACAAGTTCTTAAAAGAACAGAAAGGCGGATTGTTTGGGGATTCTATCAAGTGGAACTTCGCAAAGTTTCTTGTAGACAAACAAGGGAATGTTGTGGATCGATATGCTCCTACAACATCACCTCTTGAGATTGAGAAGGACATAGAGAAGCTGTTGGCATCTGCTTGAACATAAAAAAAAAATTCAAGGTGAGTTGTTGTGCTAGATAATCTCTATGGAATTAAGACAAGAAACTAATTCATAGGTTGAATGTGAACATATACCTGTAGTTAGAAACTTGGGATGCAACTTTTGCCAAACT…	797	1	AT2G43350.1	ATGPX3 (GLUTATHIONE PEROXIDASE 3); glutathione peroxidase	Glutathione peroxidase. Functions as both a redox transducer and a scavenger in abscisic acid and drought stress responses. Interacts with ABI2 and ABI1.	Identical to Probable glutathione peroxidase 3, mitochondrial precursor (GPX3) [Arabidopsis Thaliana] (GB:O22850); similar to ATGPX1 (GLUTATHIONE PEROXIDASE 1), glutathione peroxidase [Arabidopsis thaliana] (TAIR:AT2G25080.1); similar to phospholipid hyd	85.06	87	13	0	3	263	120	206	2e-38	155
MMN1.Contig_1024	GAATTCGAAGAAGATGTCTCTTCTCTGTTTCAATCCTCTCGCTCCTCTCTCTTCTCAAAGGCTTCAACTTTCGTCTTCCGCTTCACCAGCAGTTTTCAGCTTTAAACCCAACACCATCGAGTCCAAGAACAGAGTCTCACTCAATGGGTACAACTTGAGCATTAGCAATGGAAGAGCAGTGATTGTGAAGGCAGCTGCTTCTGGTTTGGACGGAGCAGAGCCCGAGAGCACCGAGGAACCACCTAAGACTGTTGTCTCTGATGTTCAAGTGGATAAACTACCGTTGGAGTCAAAAGAAGCTAAAGAGAAGATGTTGCTTGAACAGAGGATGAAGATGAAGCTGGCCAAGAAGATTAGGCTAAGGAGGAAACGTCTGGTTCGTAAGCGGAAGTTGAGGAA…	589	1	AT3G56910.1	PSRP5 (PLASTID-SPECIFIC 50S RIBOSOMAL PROTEIN 5)		Identical to Plastid-specific 50S ribosomal protein 5, chloroplast precursor (PSRP5) [Arabidopsis Thaliana] (GB:Q9LER7;GB:Q94B31); contains domain PD031914 (PD031914)	78.81	118	25	2	92	445	33	148	9e-27	116
MMN1.Contig_1025	GGGTTCCACATCATCTTCTTTGTATATCTACTCTCCTTATTTAATCTTCTTCTACACACACACGCAACCACATGTGTATGTACATGTAAAGCAGATACTGAGATCAATATCGTTATCAATGAATTTACCACCGGGATTCAGATTCTTTCCCACGGACGAAGAGCTCGTCGTCCACTTCCTCCACCGTAGAGCTTCACTCTTGCCTTGTCATCCTGACGTCATCCCTGACCTCGATCTTTACCCTTACGATCCTTGGGACCTTCCCGGGAAAGCTTTGGGGGGAAGGGAGGCAATGGTACTTCTACAGTAGAAAGACGCAAGAAAGAGTGACAAGCAATGGGTATTGGGAATCAATGGGAATAGACGAGCCAGTTTTCACAAGCTCCACACACAAGAGAG…	750	1	AT5G64530.1	ANAC104/XND1 (Arabidopsis NAC domain containing protein 104); transcription factor		similar to ATNAC2 (Arabidopsis thaliana NAC domain containing protein 2), transcription factor [Arabidopsis thaliana] (TAIR:AT3G15510.1); similar to hypothetical protein [Vitis vinifera] (GB:CAN66223.1); contains InterPro domain No apical meristem (NAM) p	93.1	58	3	1	119	289	1	58	1e-13	73.6
MMN1.Contig_1026	CTATCAACTTTCGATGGTAGGATAGTGGCCTACCATGGTGGTAACGGGTGACGGAGAGAGGTTAGGGATCGCGAGAGGAAAATGGAGGTCCCAGGTTCATCGAAGAAGATGATCGCAACGCAGGAAGAGATGGTCGTAGCCAAAGTACCGCTCGGATACAGAGATCAGTGCGCTCATCTCCTGATGCCGCTCAACAAATGTCGCCAGGCTGAGTTCTTCCTCCCGTGGAAGTGCGAGGACGAGCGCCACGTGTACGAGAAGTGCGAGTACGAGCTCGTGATGGAGAGGATGCTCGCGATGCAGAAGATCCGCGAGGAAGACGCCAAGGCTAAACAGAATAAGCTACAAGGGAACGGTGTTCCGCTAATCCCTAAGACCGCTAATGCTTAGCCCCTCCTC…	646	1	AT2G02050.1	NADH-ubiquinone oxidoreductase B18 subunit, putative		similar to hypothetical protein [Vitis vinifera] (GB:CAN63291.1); contains InterPro domain NADH-ubiquinone oxidoreductase B18 subunit; (InterPro:IPR008698)	87.38	103	12	1	82	387	1	103	5e-47	184
MMN1.Contig_1027	CGAGGCATTCAATGCATCTTCACCCACGTCAAGGACCCCACCGCTTTTCGGGACAATGAAGTATCTATCAGAGAAAATACCGAAAGAAACTTCAAGTAAAGTCAGGATAAACCGTGATCTATACTCATATGAAAAAATCATGGAAACGGCCCCAACTCTTCCTGATTTTGCATTGGCATTGAAACCTGATGAGTACCAACTCCCTTCGGTAGATGCATCATGGTCCGAAGATAGGACTAAAAGCTCATCAAGTCACATTACAGGCAACCAAAGATAGAGCAGTGGATAGAATGAATGTTACCTTATAGAGTACAAAGCCAGTGGCCGCCATATAAATACCAAATGGTATTAGCTCTATAAACTACTTTTATGATTCCCCAATTGTTGATAATATATGTA…	534	1	AT1G73390.3			similar to unknown protein [Arabidopsis thaliana] (TAIR:AT1G17940.1); similar to unknown [Populus trichocarpa] (GB:ABK95976.1); similar to unnamed protein product [Vitis vinifera] (GB:CAO62047.1); contains InterPro domain BRO1 (InterPro:IPR004328)	90.91	88	6	1	2	259	332	419	2e-39	158
MMN1.Contig_1028	GACACACTCGTTAACTTCTCTAAAAACGTGAGTTCCATCACAGATTAAACACTACAGTCGAATCTTCCGATGTGTCACAAGTTTTCAACTGTGGGGTGTCCAAATCTAGCTTGATGATATATTGACAGTTCACCATTAGAGCCAAGACCGTCATCGGAGTAGCCGGCAGCCGTCATCATCAGATTCAAGCATAACCAATCTCATGATAAAACTGTAACCTTTTCTAGACTCGCCGCTGAGCCGTCGACTCGCAGGTCCGAGAAACTTACCAGGAATCAATATTTGCTCCAGTGGTGTGAAGAACTTGCATAAGAAGTGTTACAAGATTGGAAGAACCTCCATTCTTCGAGTAAAGCCCCGTCGTGGACAAAGTTCTCCACCAAATCCGGTATGAAGATG…	533	1	AT1G79840.1	GL2 (GLABRA 2); DNA binding / transcription factor	Glabra 2, a homeodomain protein affects epidermal cell identity including trichomes, root hairs, and seed coat. It also down-regulates seed oil content. Expressed in atrichoblasts and required to suppress root hair development. Also expressed abundantly d	Identical to Homeobox protein GLABRA2 (GL2) [Arabidopsis Thaliana] (GB:P46607;GB:Q39018;GB:Q9C5F1); similar to ATML1 (MERISTEM LAYER 1), DNA binding / transcription factor [Arabidopsis thaliana] (TAIR:AT4G21750.1); similar to ATML1 (MERISTEM LAYER 1), DN	31.71	41	28	0	301	423	514	554	1.5	29.3
MMN1.Contig_1029	GATCAACAACTTTCACAAATCAATTCTCCTTTTTACAAACAAAGCAAGAGTTTCTCTTATTTCTCCAATTTGACCACAAAAAAAAAGAAAGAGAAAAAAATGAGTTCAAGAAGCAAAGCATGGTTAGTGGCAGCAACCATCGGAGCCGTGGAGGCCTCCAAAGACCAATTAGGACTATGCCGGTGGAATTACCTTATTCGATCGGTGAATCAACGAATCCGAAACAACGTGAGATCCGCTGCTCAGGCGAACAGGTTCTCTTCTTCGTCCACCGCCGCCGTTGCCTCCTGTAAGGATGGTGACAAGGCCAAGAAAGCTGAGGAGTCTCTCAGGACCGTCATGTACTTGAGCTGTTGGGGTCCTAATTGATGAAGACAGATTAATTCAGATTTTTTACTT…	584	1	AT4G10270.1	wound-responsive family protein		similar to wound-responsive protein, putative [Arabidopsis thaliana] (TAIR:AT4G10265.1); similar to unnamed protein product [Vitis vinifera] (GB:CAO41250.1)	76.19	84	19	1	118	366	7	90	3e-31	131
MMN1.Contig_103	GTTCCAATATTCTCTTCAGCTCAAATCCTCTGGTTATGGCGTCTCCGACTTATCTAAACTCAACCCCTACAGATCTCGTTCGAAGAAAAAAGAGACAATCCGCTTCCTCCTCCGCCGCATCGTCTCGGAGAAACAACGCAGCTTCCGCAACCGCCGGAGACGGCGAGAGCCACGCGCGATGGAGATCGGAGAAGCAGCAGCGTAGCTACTCCGCCAAGCTGGTCCAGGCGCTGCAACAGGTCCGCCTCAGCTCCTCCGCCGCCGAAACACCATCTCCGACGGCGAAGAAGCGGGGGAAAGCCGTCCGGGAAGCCGCCGATCGCGCTCTCGCCGTCTCCGCTCGCGGGAGGACGCTCTGGAGCAGAGCGATCCTCGCTAACCGGATCAAGCTCAAATTCC…	871	2	AT3G06590.2			similar to transcription factor [Arabidopsis thaliana] (TAIR:AT3G17100.2); similar to transcription factor [Arabidopsis thaliana] (TAIR:AT3G17100.1); similar to unnamed protein product [Vitis vinifera] (GB:CAO44932.1); contains InterPro domain Basic helix	76.38	199	46	3	60	653	13	204	8e-61	230
MMN1.Contig_1030	GGTTTTTTAAGGGCTTCCAGCTTTTGATATTGTGGGTTTTACGAACGCGCAATAATAGCGTGAGACGTTAATATAGTTCTTCTTATATTTAAGGATTGTATTTTCCTTCAGTCTTGTTTTTACAGATACTGATATTGAAACGAAGCAGAGATGTGTAGTCTGGCGACAAATCTCTTATTCCCATCGAAGATGAAACCCGCTTTTACAGAGAAACAGAGCACTAGCTCACTCTTCGTTACTACAAATAACAGATCCAAGATGAAGAACAGATCTGCTGTTCCTGTTGCAAGATTATTTGGACCGGCGATTTTTGAAGCCTCCAAATTGAAAGTATCATTCTTAGGAGTTGATGAGAAGAAGCATCCATCAAAGCTCCCAAGAACTTACACTCTTACTCAC…	789	1	AT4G11910.1			similar to ATNYE1/NYE1 (NON-YELLOWING 1) [Arabidopsis thaliana] (TAIR:AT4G22920.1); similar to putative staygreen protein [Nicotiana tabacum] (GB:ABY19382.1)	87.65	81	10	0	545	787	101	181	1e-78	154
MMN1.Contig_1031	GGTGTTTGTGTTACAGAGATACAGAGATTTTTTTTTCCTGGAAAAAAAAATTTAGAGCTCGTAGCTTCCAGGAAGTAATATCAATGGGTAGTGAAGATGAATCGATAGAGCACAAGTCTGCTGCTCGTAAAGAGGCGCTTAGAGCTTTAAGAGCAGCTAAGGAGCTGTCGGAGAGCAAGGAAGAGGGAGAAGGAGATGACTCTGCTGCTGTCGAAGAAGATGGTCCAGCCATGAAGTTTAGAAACTATGTTCCCCAAGCTAAGGAGCTTCAGGACAGTAAAGTTGTACCACCAGAGCTACCCAAATTCGAAGATCCAGTTGCTGCACTTCCACCTGCTGTGGAGAAGAAAGAGGACCCATTTGTCAACATTGCTCCAAAGAAACCGAACTGGGACCTCC…	788	1	AT3G05070.1			similar to unnamed protein product [Vitis vinifera] (GB:CAO62046.1); contains InterPro domain mRNA splicing factor, Cwf18 (InterPro:IPR013169)	89.62	106	11	0	207	524	39	144	6e-51	197
MMN1.Contig_1032	GAAAGTCGAATCGGATCTCAGTGATCAGAGTCAATTCGATCGAGCAAAGATGACGGAGGCGATGATAAGGAAGAAGCCTGGGATGGCGAGTGTGAAGGATATGCCGCTGCTTCAAGATGGTCCGCCACCGGGTGGGATTCGCGCCGGTCCGATACGCTCGGCGGATATCCAATACGGGTCCTAGCGCCATGGCTATTTTCCTTACAGTTTCTGGTGCATTTGCTTGGGGGATGTACCAGGTCGGCCAGGGAAACAAGATCCGCAGGGCGTTGAAGGAAGAGAAATATGCTGCTCGTAGAGCTATACTTCCCATTCTTCAAGCTGAAGAAGATGAAAGGTTTGTGTCCGAGTGGAAAAAGTATCTGGACTACGAGGCAGATGTAATGAAGGATGTTCCGG…	714	1	AT2G33220.1			similar to MEE4 (maternal effect embryo arrest 4) [Arabidopsis thaliana] (TAIR:AT1G04630.1); similar to unknown [Populus trichocarpa] (GB:ABK95941.1); contains InterPro domain GRIM-19 (InterPro:IPR009346)	99.13	115	1	0	135	479	29	143	6e-72	240
MMN1.Contig_1033	TCGTGCTCAAGTTTCTGAGGGAAGGAGGAACCATGGTAACATATGGTGGGATGTCTAAGAAGCCAATCACTGTTTCAACAACATCTTTCATCTTTAAGGATTTGGAGCTGAGAGGGTTTTGGCTGCGGAACTGGTTGAGTTTGGGTAAAGTGAAAGAATGCAGGGAGATGATAGACTATCTCCTCGGGCTTGCGCGGGACGGAAAGCTAAAATACGAAACGGAACTGGTTCCTTTCGACGAGTTCCCTGTTGCTCTCGATAAAGCGCTTGGGAAGGTAGGTAGGCAACCCAAACAAGTAATCACATTCTGAAGCTTCCTTCCTGTGAGCCATTCAAGAAGTGTTGCCACTGTGTTAGTGTTATGTATGAACGTATTAGTAATCTGATGATGCAAAATGT…	483	1	AT3G45770.1	oxidoreductase, zinc-binding dehydrogenase family protein		Identical to Probable trans-2-enoyl-CoA reductase, mitochondrial precursor [Arabidopsis Thaliana] (GB:Q8LCU7;GB:Q8W4H6;GB:Q9M166); similar to ARP protein (REF) [Arabidopsis thaliana] (TAIR:AT1G49670.1); similar to unnamed protein product [Vitis vinifera]	93.14	102	7	0	3	308	274	375	2e-51	198
MMN1.Contig_1034	GGGTTTGGATTACTAAAGCATCAAAAGTTCGTTCGTCTGTGTGGAAAGTTATGAATAAACGACCAGGTTACAACGCAAGTGATTCAGATTCGCATTCTGAGTAGTATCATATATCCATTTAGAAAGAGCTTGTTTGTGTTCTGTTTTGTCTCACATATTGGATGTTCCGAGTTCATACAATAAACACTATCTGTCTCCGCCCAAATCAATTTTGGTGTTTGCTAAAAAAAAAAA	234	1	AT2G38450.1	binding		similar to unknown protein [Arabidopsis thaliana] (TAIR:AT5G05360.1); similar to unnamed protein product [Vitis vinifera] (GB:CAO48811.1); contains InterPro domain Sel1-like (InterPro:IPR006597)	81.82	33	6	0	3	101	106	138	8e-11	62
MMN1.Contig_1035	CAGAGAGGCGAGTTCCGTGTTTGTTTTCTCTTTGTTGGCTCCTCCTCCTCGTGATCTCAGGCGAAAATGGCGTCGTTTGATGAAGCACCACCAGGAAACTCCAAGGCCGGAGAGAAGATCTTCAGGACCAAGTGTGCTCAGTGTCACACCGTCGACAAAGGCGCCGGTCACAAACAAGGACCGAACCTAAACGGTCTGTTTGGAAGACAGTCTGGAACAACAGCTGGTTACTCTTACTCTGCTGCTAACAAGAACAAAGCTGTGGAATGGGAAGAGAAGACCTTGTACGATTACTTGCTCAACCCCAAGAAGTACATTCCTGGAACGAAGATGGTCTTCCCTGGGCTCAAGAAGCCTCAAGACCGTGCTGATCTCATTGCCTACTTGAAGGAATCTACT…	633	1	AT1G22840.1	ATCYTC-A/CYTC-1 (CYTOCHROME C-1); electron carrier	Encodes cytochrome c. Contains two site II (TGGGCC/T) elements, which interact with a TCP-domain transcription factor, and a downstream internal telomeric repeat, and are required for expression of the Cytc-1 gene. Promoter directs preferential expressi	Identical to Probable cytochrome c At1g22840 [Arabidopsis Thaliana] (GB:O23138); similar to CYTC-2 (CYTOCHROME C-2), electron carrier [Arabidopsis thaliana] (TAIR:AT4G10040.1); similar to Cytochrome c (GB:P62772); contains InterPro domain Cytochrome c, cl	96.43	112	4	0	67	402	1	112	2e-60	228
MMN1.Contig_1036	GGATTATCGTCGAAGGATCGTTGTGGAGATTTGATAGCGAAGGAGAGAGATCGAAGCACTGATGACGGGAGGAGTGATCAAGCTCGTGAAGCCGAAGATCCAATCTGTGGATATCCAGGCCGCCGCAGGATGGGGTATCGCCGCCGCAACCGGCGCCATCTGGGTCGTCCAACCTTTTGATTGGATTAAGAAGACATTCATTGATAAACCAGCACCTGAAGACAAGTGAGTGATCAAGATTCAAGAGAAAATGAGATTTTTTTTCTTCCAGTTTTCAAGTTTGTTATTGCATCTTTGCGATGTAGCTGAATAAAATTTTGTTTCTTTTCTGGAAAACGTGTTGTTTCATGCCTTCAATGTAGACATTCTGTTTCAAAAAAAAAA	384	1	AT2G40765.1	unknown protein			75.93	54	13	0	65	226	4	57	5e-09	56.2
MMN1.Contig_1037	GGCAATACATCACAAACTAATCCCCAATTTTCGAAACCCTAAACCTCAAATCCAATAAGCTAATCTGAAATCAAGAGCAATTGATTCCAAATCTCAGTTAACCTGGGCCTTATCAGCGAGGTGAACGACGAGGCGTCCCACGGGGAGCGGAGACTCATAGGTGAAGGAGTGGTTGATAGCCTCCGATCTCATATAACGAGAGAGGACACGGCCATCGGCGGTGAGCCCAGCGATCGCGACGCCTATGTGGTCATCGACTTTGAAGATCTTCTTCTGGTGGGAGGAGAGCTCGGATTGGGCCTTGTTGACGCAGGCGAGGACGACATGGGAGCGAGATCTGAGCCCGATGGCGGCGGAGCCTTGCTTGACTGCTTCCATGGCGTACTCCACTTGGAAGAG…	583	1	AT3G58620.1	TTL4 (TETRATRICOPETIDE-REPEAT THIOREDOXIN-LIKE 4); binding		similar to TTL3 (TETRATRICOPETIDE-REPEAT THIOREDOXIN-LIKE 3), protein binding [Arabidopsis thaliana] (TAIR:AT2G42580.1); similar to hypothetical protein [Vitis vinifera] (GB:CAN62839.1); similar to unnamed protein product [Vitis vinifera] (GB:CAO69870.1);	47.62	21	11	0	349	411	473	493	8.8	26.9
MMN1.Contig_1038	GATCCTCCCTTTGAGCTCATCCGATTCCTTTGAAACTTTCTGGGTTTCGAGGTTTTTCCATTACAATATTAGTTTTTTTTTTTCTCTTTGTAATCATCTTACCAATTCAACTGCGTTAGAATCGGCGAATAATCGGAAGCACGACGATGGGGTGTTGCGCGAGCAATACAGCAGGAGGAGGAGGTTCAAAGGCTAGCCGGATGGCACGGTGGCGATCCACCGGCATTATTGGGCTTCGCGACTCCAAATTGAAGACATTTCCTGATGAAGTGATTGTAATGGAGAGAGCAGTACGAACACTTGATCTAACACACAATAAGATCTCGGATGTTCCTGCAGAAGTTAGCAAGTTAATCAATATGCAGCGTCTGTTAATAGCTGATAATCTAATTGAGCGTC…	745	1	AT5G07910.1	leucine-rich repeat family protein		similar to ubiquitin family protein [Arabidopsis thaliana] (TAIR:AT2G30100.1); similar to predicted protein [Physcomitrella patens subsp. patens] (GB:EDQ53725.1); contains InterPro domain Leucine-rich repeat; (InterPro:IPR001611); contains InterPro domain	90.95	199	18	1	147	743	1	197	8e-90	326
MMN1.Contig_1039	TATAGGTCGGGCGCTGCAGCGCCATCCATTTTTTGGTAGGCAGAACTGGGGAGGCGGGAGGAAGCGGGAGCGGGGTTACGGTGGCCGAGTGCGCGCGAACGTATGAGCCGCAGAAGGGGGTTGGTCGAGTAGAGAGCATACGGCTGTGGTGGTGGAAGTCTAAATCCGCTAAGGAGTGTGTAACAACTCACCTGCCGAATCAACTAGCCCCGAAAATGGATGGTGCTGACGCGCGCGATCATTCCCTGGCCGTGCTGGTCGACTTTCCGGGAATATGTCTGGGGGAGTGGTATGGTACGCTCGTATCAGGTATGGTGGTGGACGTTTTGAGGGCGCTTACACGGTCACTGACTAGTAGCGCAGGGTAGTTCGGTTGCGGAGAGCTCGCGCCCTAATGTG…	739	1	AT4G21990.1	APR3 (APS REDUCTASE 3)	Encodes a protein disulfide isomerase-like (PDIL) protein, a member of a multigene family within the thioredoxin (TRX) superfamily. This protein also belongs to the adenosine 5'-phosphosulfate reductase-like (APRL) group.	Identical to 5'-adenylylsulfate reductase 3, chloroplast precursor (APR3) [Arabidopsis Thaliana] (GB:P92980;GB:O48887;GB:Q38948); similar to APR2 (5'ADENYLYLPHOSPHOSULFATE REDUCTASE 2) [Arabidopsis thaliana] (TAIR:AT1G62180.1); similar to APR1 (PAPS REDU	40	30	18	1	90	179	289	314	9.9	27.3
MMN1.Contig_104	RGAATGCATTGGATGGATGCCCGGGCATTGAGAAGGAAGGACGCTTTCAGAGGCGAAAGGCCATGGGGAGATACCGTCTGTGATCCATGGATCTCCGATCGGGAAACCGTATCCAAGCTCCGTGGCTAGTCTGCGCTCTTTGGACTTTGAAAACTTAGCGAACTGAAACATCTAAGTAGCTAAARGAAGGGAAATCAACCGAGACCCCGTTAGTAGCGGCGAGCGAGAGCGGATTTGGGATTTGAAGAAAAAGAAAGACGAAGCTTCGTTCCAAAGTGTTCACTTCTTTTTCGCCAGGTTTCATTCGATTTCTTGTGGATTGGATGATGGAAAAACCAGCAAGCCCCTCTTCTTTCAGTCGAGTTACTTCGTACCTCTTCTTTCAGATTCCTAAAGGGC…	1586	109	AT1G09935.1	phosphoglycerate/bisphosphoglycerate mutase family protein		similar to unknown protein [Arabidopsis thaliana] (TAIR:AT1G58280.1); similar to unnamed protein product [Vitis vinifera] (GB:CAO67833.1); contains InterPro domain Phosphoglycerate mutase (InterPro:IPR013078)	26.56	64	45	2	1175	1360	162	224	1.9	31.2
MMN1.Contig_1040	GACGACCAATCTTCGCACGGTTCCTGTCGTAACGCTCTTTCCTTTTGTTTTCTAGAGAACAAGTTTTATTTGCTGTGAGATATAAAGGTTGGCAATGGCGAGGATAAAACCTCAGGCTCTGCTTAATCAAAGCAAGAAGAAGAAGGGTCCTAGTCGCATAAGTATTTCTACAATTGTCGTGTGTAATCTCGTAGTTGCTGTAGTTGTACTCTCCTTGGTCACTACTTATCGTCATTGGTCCCAGAGGTCAAGAAACACACTTGAAACCCAGAGCCATAGTTTTGAGGACACAAATGCTGTATCACAACAAAAGAATTACGATCTTCCTGGTTATGCCGATATAAGCACATCAAAAGGTCTCATAACTGTGGAACTCTTTAAAGATGCTTCCCCTGAAGC…	793	1	AT3G66654.2	peptidyl-prolyl cis-trans isomerase cyclophilin-type family protein		similar to peptidyl-prolyl cis-trans isomerase cyclophilin-type family protein [Arabidopsis thaliana] (TAIR:AT2G47320.1); similar to unnamed protein product [Vitis vinifera] (GB:CAO44909.1); contains InterPro domain Cyclophilin-like (InterPro:IPR015891);	87.33	221	26	1	95	751	1	221	1e-99	357
MMN1.Contig_1041	CGGTGACGTATGCTGTGAAGCTGCCTAACGGGAAGACCAAAGGATCTCTCAAGTTCTCTTTCAAGTTCGGTGAGAAGTATACTTTCGGGTCTTCGAGTGATCCTCACGCGCCTGGCTCATCGAGTGTTGACAACAAGTCTATGGATCAGCCCGTCGCTGCTTACCCGCCCGGACAAGGCGCCCCGGGTGCATACCCGGCTCCTCCTGGACATGATGAGAAACACGGCGGTGTTTACGGTTACCCACAGGCCGGTGGATATCCGCCACCTGGTGGTCCCGGTGGTTATCCTCCAGCTGGGCCTGGTGGGTATCCGCCTCCCGGTGCATACCCGCAACAAGGTGGATATCCACCTCAAGGAGGCTACCCGGGTTATCCACCACAGGGTCCAGGCTATGGGT…	803	1	AT1G09070.1	(AT)SRC2/SRC2 (SOYBEAN GENE REGULATED BY COLD-2); protein binding	SRC2 specifically binds the peptide PIEPPPHH, and moves from ER to a vacuole fraction where it gets internalized. Involved in Protein Storage Vacuole targeting.	similar to C2 domain-containing protein [Arabidopsis thaliana] (TAIR:AT3G16510.1); similar to unnamed protein product [Vitis vinifera] (GB:CAO70977.1); contains InterPro domain XYPPX repeat (InterPro:IPR006031); contains InterPro domain C2 calcium-depende	79.17	48	10	0	3	146	113	160	5e-10	61.6
MMN1.Contig_1042	CTCTCTCGTGTTAACTCCTTCGACGACGGCACAAAGAAAGCTTGGGTTGATAAACGAACCAGTGATCTCTGTTTATGCTTATCGGTTAAGGGCCTGTCGGTAACCGGGATTGATGATCGGAGATACTGGAATCACATCCCTTCTGATGAATCTCGATTTGCTTCAGTAGCATACCTTCAGCACGTCTGGTGGTTTCAAGTTGATGGAGAAATTGAGTTCCCGTTCCCAGCGGGAACCTACAGCGTCTTCTTCAGGCTTCATCTAGGCAAACCGGGGAAGCGGTTTGGTTGGAAGGTTTGCAACGCTGACCAGATTCATGGTTGGGATATTAAACCGGTTCAGTTTCAGATTTGGACTGAAGATGGTCAACACTCTTCGTCTCAGTGCAAGTTAACCGAA…	697	1	AT1G63090.1	ATPP2-A11 (Phloem protein 2-A11); carbohydrate binding		Identical to F-box protein PP2-A11 (PP2A11) [Arabidopsis Thaliana] (GB:Q9CAN4;GB:Q84WN6); similar to ATPP2-A12 (PHLOEM PROTEIN 2-A12), carbohydrate binding [Arabidopsis thaliana] (TAIR:AT1G12710.1); similar to unnamed protein product [Vitis vinifera] (GB	84.13	189	30	0	1	567	98	286	1e-98	355
MMN1.Contig_1043	GGTTGTGAAGAAATCAAACGAGAGTTTTAAAGGATTGTGTGATCTGTTTTAATGTTCTTTTCCATCCTTTTAATGAAGCAATCCAACTCCATCTTCCTTTGATTTGCGAATAAATAAATATAATTTCTTGAGTTTGTACC	140	1	no significant hit
MMN1.Contig_1044	GGAACAGAGACGTTGTCCAGATGCAGCAAACTGACGCTCAGAATATCAAAGCATTGGAGGAGTCAAAGTTGGTTAAAGACATTGAGGGGATGAAGCTAAAAGTCAATGCTCTTGAATCCAAGCTAAAGCAGGCTGATTCAACCATTTCGAAGCTAATGGAGGAGCGGTCTACAAGCTTCCAACATAGAGAAAGCTTGCAACAAGAGCTGGCGGAACTGAGGACGAAGAAGATAGTGAAAGAAGTGCACATTGGATTCCCTCTGCTATATGTATGCGTGGTGGCATTCATTAGCATTGTTATCGGGTATTGTCCGCGCACTTGACTGCTCGGCCTTTCTCTCTCGATCACACATATCTTTTATATCTCTTAGCAAGTGTGCAGTCAGAAAATATAGACAA…	684	1	AT1G08820.2	VAP27-2 (VAMP/SYNAPTOBREVIN-ASSOCIATED PROTEIN 27-2); structural molecule	Encodes VAP33-like protein that interacts with cowpea mosaic virus protein 60K. Is a SNARE-like protein that may be involved in vesicular transport to or from the ER.	similar to VAP27-1 (VAMP/SYNAPTOBREVIN-ASSOCIATED PROTEIN 27-1), protein binding [Arabidopsis thaliana] (TAIR:AT3G60600.1); similar to VAP27-1 (VAMP/SYNAPTOBREVIN-ASSOCIATED PROTEIN 27-1) [Arabidopsis thaliana] (TAIR:AT3G60600.3); similar to VAP27-1 (VAMP	80.95	105	20	0	6	320	282	386	1e-40	163
MMN1.Contig_1045	GGGTGAAACCAAACACAGACTTTGATTATTAGGTTTTGATGTTTCATGTAGTTTATACAGATAAACTAGTTCTAGTTTATATTATTTCGGTGTAGTGGTGTCTGATCTTCTGTATTTTGCATCAGCTTCTATTTCTTTTACCATTTATTCAAGTTTTTTCCTTTTTCAGAGAGATTCGGTTTATCATTTTACATCTCTTTTTTGCCACTTTAGACAGAAATCATTTATCTAAACCGGACAAGCTTTAAAATTATTAATTAAACCTAATATTTTCGAGGTATAACGTTTGAAGAGATTCTCTATATGAAGAAACAATTTTAAGGTGGAGTTGTTTTGAGTTCTTGAAACATGTAATGAAACTCAAAACATGTAATGAAACTAATGTACCAAAACAGACAA…	747	1	AT2G46060.1	transmembrane protein-related		similar to hypothetical protein [Vitis vinifera] (GB:CAN75717.1); similar to unnamed protein product [Vitis vinifera] (GB:CAO39678.1); contains domain PTHR14319 (PTHR14319)	36.11	36	23	0	86	193	732	767	4.5	28.5
MMN1.Contig_1046	GAATATGTGGAAGATGAAGAGGGTAAGCCAAAACTGCAGATCGACGCTCAAAACTGTTTGCACTGCAAGGCATGTGATATTAAAGATCCGAAGCAAAACATAGAGTGGACAGTGCCTGAAGGTGGTGGCGGCCCTGCTTATTCCGTAATGTAGTAATCCTCATCAACACGCACTTTACCACGTCCCATAAGTAAATAAAGACTCAAAACAAAACCATATGTTGTTATGAGCTTTTTAGTGATAGAAAGTGTATGATGTTTTAGCTTGTTGTAAACTTTCATTTGACATTTAATGGGAACACATCAC	306	1	AT2G43400.1	ETFQO (ELECTRON-TRANSFER FLAVOPROTEIN:UBIQUINONE OXIDOREDUCTASE); catalytic/ electron acceptor	Encodes a unique electron-transfer flavoprotein:ubiquinone oxidoreductase that is localized to the mitochondrion. Mutants are more sensitive to sugar starvation when plants are kept in the dark for long periods.	similar to unnamed protein product [Vitis vinifera] (GB:CAO16939.1); similar to putative electron transfer oxidoreductase [Oryza sativa] (GB:AAK39567.1); similar to Electron transfer flavoprotein-ubiquinone oxidoreductase,mitochondrial precursor, putative	94	50	3	0	1	150	584	633	3e-25	109
MMN1.Contig_1047	AACTGTTACAACCCTATTTTAAAAATATAACTCGTGTGTTCGTGCAAATGTATTTTTTATGGATCAAAATTTTAATGTAAAATAAAATGGTTATCTATTTTTATATTTGATTTATACGATTAAATAATTCAATATATTATTTAAAATTTTGTGGTTTATATTATGTATTTTTATAACACTTTTATGTTTTTTAGACGTAGTTAATATAC	209	1	no significant hit
MMN1.Contig_1048	GTAGCGGCTGCTGAGAGAGAAAAAAATGGCAACACCTCAAGTGAAGACTGGTCTGTACGTTGGTCTGAACAAAGGTCACGTCGTCACCAGACGCGAGTTAGCTCCTCGTCCCAACTCTCGCAAAGGGAAAACGAGCAAGAGGACATTGTTCATCAGATCACTGATCAGGGAGGTTGCTGGATTTGCTCCTTACGAGAAGAGAATCACTGAGCTTCTCAAGGTTGGTAAGGACAAGAGGGCTCTCAAGGTCGCTAAGAGGAAGTTGGGTACCCACAAGAGAGCCAAGCGAAAGAGAGAGGAGATGTCTAGTGTTCTCCGTAAGATGAGGTCTGGTGGTGGTGGTGTTACTGAGAAGAAGAAATAAACATGTTAAGTCTTCTATGTTATTGGAGTATTAAG…	552	1	AT3G53740.4	60S ribosomal protein L36 (RPL36B)		Identical to 60S ribosomal protein L36-2 (RPL36B) [Arabidopsis Thaliana] (GB:Q9M352;GB:Q8L5U3); similar to 60S ribosomal protein L36 (RPL36A) [Arabidopsis thaliana] (TAIR:AT2G37600.1); similar to 60S ribosomal protein L36 (RPL36A) [Arabidopsis thaliana] (	92.86	112	8	0	26	361	1	112	1e-50	195
MMN1.Contig_1049	GCATGGAGGTTTCAGACAAATCTCTACGGAAATGGAAGCACGCCTAGAGGTCGCGAAGAGAGATATCGTCTCTGGTTCGATCCTTCTAAAGAGTTTCATCGTTACAGCATCCTCTGGACTCCTCACAAGATCATATTTTGGGTTGATGATGTACCAATAAGAGAAGTGATAAAAAGTGAAGCAATGGGAGCCGATTATCCAGCGAAGCCAATGGCTCTTTACGCCACCATCTGGGATGCCTCCGATTGGGCAACCTCCGGCGGAAAATATAAAGCCAATTACAAATTTGCCCCCTTCGTCGCCGAGTTCAAATCTTTCTCCCTCGATGGCTGCTCCGTTGATCCCATCCAAGAAGTTCCTGTTGATTGCGCTGACTCTGTTGAGTTCCTTGAATCGCAA…	786	1	AT1G32170.1	XTR4 (XYLOGLUCAN ENDOTRANSGLYCOSYLASE 4); hydrolase, acting on glycosyl bonds	xyloglucan endotransglycosylase-related protein (XTR4)	Identical to Probable xyloglucan endotransglucosylase/hydrolase protein 30 precursor (XTH30) [Arabidopsis Thaliana] (GB:Q38908;GB:Q8LDA9;GB:Q9FVR2); similar to xyloglucan:xyloglucosyl transferase, putative / xyloglucan endotransglycosylase, putative / en	92.31	221	14	1	4	657	123	343	1e-103	372
MMN1.Contig_105	TGGCAGGAATCACCACAAAGCTGAACATGGATTTGGTGGAAACATCGAGGGTAGAGGAAGAAGAAGAGAAAGGACAAGCCATGGAGAAGGCAAGGAGACAAAAGGAGCAGTTCAATGTAGATTGGAAATGGATCGCTGTAGGAGGAGTTGCTTTGGCTTGTGGGCTTCATTCAAGTGCTATTGGCAAGGCCTTAATGGTTGGAGCAGGGCAGAGACTTGCTCGTAGGTGAAAATATTTCTTATTATCTCAACCTGAGAGATTTGATATTATTATGTGTTTCCCTTGAGGACTCTTTAGTCCAGCACAGAGAGGCAGAATCTAGTATATGCATCATGGGTTGTGCTTTCTTCTTGTAACTGCGTTTAGTGGAGGAAGYAAAGTGAAGAGTAATTTTGAGC…	476	2	AT3G23080.2			similar to unknown protein [Arabidopsis thaliana] (TAIR:AT4G14500.1); similar to unnamed protein product [Vitis vinifera] (GB:CAO71306.1); contains InterPro domain Lipid-binding START (InterPro:IPR002913)	81.33	75	14	1	3	227	315	388	4e-26	114
MMN1.Contig_1050	GGCCTCTTCGTCTTTGTTTTGCTATTTACTCCATTTTCTCAAATATTTAAAACAGTATTTTTGCTTCCTTTATTTTCTTGTAATGGCTTTCTCTCCGATCAACTGCCTCATTTTCGATTTGGATGACACATTATACCCTCTGAAAACGGGAATAGCTCCAGCCGTCAAGAAAAACATCGACGATTTTCTAATGGAGAAATTTGGATTTTCTGAAAGTAAAGCTTCAAGTCTAAGAGTTGAACTCTTCAAGAGTTATGGAAGTACTCTCGCTGGTCTCAGGGCATTAGGTCACGATGTTCATCCTGATGAATATCACAGTGTCGTGCACGGAAGGTTGCCGTATGGTTCAATCCAACCTAACAGCAAACTAAGAAACCTTCTGAACAAAATCAAACAGAA…	794	1	AT2G32150.1	haloacid dehalogenase-like hydrolase family protein		similar to haloacid dehalogenase-like hydrolase family protein [Arabidopsis thaliana] (TAIR:AT5G02230.1); similar to haloacid dehalogenase-like hydrolase family protein [Arabidopsis thaliana] (TAIR:AT5G02230.2); similar to unknown [Populus trichocarpa] (G	91.03	234	21	0	83	784	1	234	3e-115	411
MMN1.Contig_1051	GGTTGCCGACGCGTCTGTGTTCTCTCTATCCTTGCAATTTGGTCTGTCTTTTGATCTTCAATCTCGTTCTCATCCACGAGCTGAAGATTTCTCGAGCTACGACGAGACTGTGATCGGATAGATAATCATGGCTACCTCCGGAAACAAGACCATTAACGCCAAACTGGTGTTACTTGGAGATGTTGGCGCTGGGAAATCCAGTCTTGTCTTACGCTTTGTTAAAGATCAGTTTGTTGAGTTCCAGGAATCAACCATAGGTGCAGCCTTTTTCTCGCAAACGTTAGCTGTTAACGATGCGACTGTTAAGTTTGAGATATGGGATACAGCAGGCCAGGAACGTTACCATAGTCTTGCTCCAATGTACTACAGGGGTGCTGCTGCTGCTATCATTGTCTTTGA…	800	1	AT4G19640.1	ARA7; GTP binding	Encodes Ara7.	similar to RHA1 [Arabidopsis thaliana] (TAIR:AT5G45130.1); similar to ras-related GTP-binding protein [Nicotiana tabacum] (GB:CAA50609.1); contains InterPro domain Ras GTPase; (InterPro:IPR001806); contains InterPro domain Ras (InterPro:IPR013753); contai	96	200	8	0	128	727	1	200	2e-105	379
MMN1.Contig_1052	GATCTGCAAATTCACAATCTTCATAGCTTAAATCCAAAAACTCAAAACAAAGCATACAGAAGAAAAGAGAGCGTCTTCTCCTGAATTATTCAGTCGGCTTCGAGATGAATTCTACAAGCAGGGCATGGTCGGTGGCAGCAAGTATTGGAGTTGTGGAGACACTAAAAGATCAATTAGGCGTTTGTCGGTGGAACTACGTTCTCCGTTCAATGAATCAACATCTTCGGAATAACATCAGATCCATTTCTCAGACCAAAAATCTTTCCTCCTCCTCATCGTCAGCCGCCACCGCACCCTTCGGTAAAACGAAGCATGCTGAGGAATCGCTCAAGATGGTCATGTACTTGAGCTGTTGGGGTCCAAACTAGGTTTCTTGAAACCTATTCGATGGATTTGCTC…	585	1	AT4G10270.1	wound-responsive family protein		similar to wound-responsive protein, putative [Arabidopsis thaliana] (TAIR:AT4G10265.1); similar to unnamed protein product [Vitis vinifera] (GB:CAO41250.1)	71.11	90	23	1	105	365	1	90	1e-28	122
MMN1.Contig_1053	TGGGCACAAGCTCAGAGGACACTTCACGGTCTCCAGCCGAAAGAAGAGGTCAACATCTTCCCAGAGAAAGGAGGTTACAGAGAGCTGTCTGAGATAGCCGAGCAAGCTAAGAGAAGGGCCGAGATAGCAAGGCTTAGGGAGCTTCACACACTGAAGGGACATGTTGAATCAGTCGCAAAGCTGAAGGGCTTGGACATTGACACAGCTGGGCATCACTACACTGTGTAGTTGCAGTTGCACTTGCACATTTTACCAAAACCAACCCATCATGACTCTTCGTTTTTTTTCTCAAGTCACAATAGAGGGAAGAGAACTCTGTGTATTGTCATAACTCTTCCAAAAAACTCGTTTCATTGTTAGCTATTGTTCGTCTAAACATCTACTCTGAGCTTAAGAAAC…	506	1	AT2G18960.1	AHA1 (ARABIDOPSIS H+ ATPASE 1); ATPase	Encodes a plasma membrane proton ATPase. Mutants have a reduced ability to close their stomata in response to drought and are affected in stomatal but not seed responsiveness to ABA.	Identical to ATPase 1, plasma membrane-type (AHA1) [Arabidopsis Thaliana] (GB:P20649;GB:O64626); similar to AHA3 (Arabidopsis H(+)-ATPase 3), ATPase [Arabidopsis thaliana] (TAIR:AT5G57350.1); similar to AHA2 (Arabidopsis H(+)-ATPase 2), ATPase [Arabidops	97.33	75	2	0	1	225	875	949	4e-37	150
MMN1.Contig_1054	GGTGGTGGTTTCTCTATAGAAGGGGGATTGGATTATTCACAGAGAGACGCTTTGAAGATAAGAGAGAAGCCATAAACCCAAAAAAAAAAATATGCTTCGACTCTGTTCCACTTTCCGTCCTCAACTTCTCTTTTCTCCTCAAATCCGATTCACAGATGGAGTTTTGATTCCCCGACTAAACTTTGGTTCGAGCAATCCAGTTGTGAGTTTCCGTCCAGTGATACGGTGCCAGAGAGTTAGCGGAGGTCGAGGAGGAGCCAACCGAAGCAAACCCGCCAAGCCTCCTGTTAAAGAAGGCAGCAACAAAACGGTTATCGAAGGTTTGGTCACCGAATCGCTTCCCAACGGCATGTTTCGAGTTGATCTTGAGAATGGAGATAACATTCTTGGGTACATTTG…	757	1	AT4G11175.1	translation initiation factor IF-1, chloroplast, putative		Identical to Translation initiation factor IF-1, chloroplast precursor [Arabidopsis Thaliana] (GB:O82499;GB:Q56YK9;GB:Q8GY59;GB:Q9T016); similar to Translation initiation factor IF-1, chloroplast precursor (GB:Q94KR7); contains InterPro domain S1, IF1 typ	87.23	141	18	0	92	514	1	141	4e-67	251
MMN1.Contig_1055	GGGAAATCGGCTGAAGAAAACGGTCTCCGACCAATTCTCTTTGACAGCTTAAAGTCTTTACCAATAGGTTCGGCAAACCAGAACCCGGTAGATGAGATTGATCTAGAGCTAGTCACAGAAGCAGCAAACTGGCTGAGAAGGAAGCTTGATCTCACAATCTTCGGATTTGATGTGGTTGTTCAAGAAGAAACAAGAGATCACGTGGTAGTAGACTTGAACTACTTACCCTCTTTTAAAGAAGTCCCTGAAAACATAGCAGTTCCTTCCTTCTGGGAAGCCATCAGAAACAGGCTTGACCAACATGTCTGAGAGTTTGTGTGTTTATTATGCTTCCAACTCTTGAGACTAGAATAAATGTAATATTTAAGGACCAGTAGCAGCAAGTGAAAGTATTGTTCT…	461	1	AT2G43980.1	ATITPK4 (INOSITOL 1,3,4-TRISPHOSPHATE 5/6-KINASE 4); catalytic		Identical to Inositol-tetrakisphosphate 1-kinase 4 (ITPK4) [Arabidopsis Thaliana] (GB:O80568;GB:Q8VYL6); similar to inositol 1,3,4-trisphosphate 5/6-kinase family protein [Arabidopsis thaliana] (TAIR:AT4G08170.1); similar to inositol 1,3,4-trisphosphate	86.41	103	14	0	4	312	384	486	2e-47	184
MMN1.Contig_1056	CAAGAGAAGCACTCAGCTGAAAAAGCTGATGAATGCTTACTGTGACAGGCAATCTGTGGACATGAACGCCATTGCCTTCTTGTTCGATGGGCGTCGTCTGCGTGCTGAGCAGACTCCCGATGAGCTTGACATGGAGGACGGTGATGAGATCGATGCCATGCTCCATCAGACCGGTGGCTGTGGTGGTGGCGGCCTGACCCTTTCCAGGGTTTAGGGTTTCTTGATGTGTGATAGGACTTGGCTAAGGAGTAATCGGCATTAGGATTTGCAAACTTGTTTCTTTTTATCGTGCAGACTTTTTTATTTTATCGTCACCATTGTCGTTAGAGAACTACATGAGGCTAAAAAAAATCCTTTTGTTGATTT	366	1	AT4G26840.1	SUM1 (SMALL UBIQUITIN-LIKE MODIFIER 1)	Encodes a small ubiquitin-like modifier (SUMO) polypeptide that becomes covalently attached to various intracellular protein targets, much like ubiquitination, leading to post-translational modification of those targets.	Identical to Ubiquitin-like protein SMT3 (SMT3) [Arabidopsis Thaliana] (GB:P55852;GB:Q9SZ24); similar to SUM2 (SMALL UBIQUITIN-LIKE MODIFIER 2) [Arabidopsis thaliana] (TAIR:AT5G55160.1); similar to Os01g0918300 [Oryza sativa (japonica cultivar-group)] (GB	98.25	57	1	0	2	172	35	91	3e-27	116
MMN1.Contig_1057	GGTCGTCGTTTCTCTCAAGCTTCGCTCTCTCTCTCTCTCGGTTACATTCTCCAGAGCAGTTAAAGAGCACAAGATGGGGTTGAGTTTCGCCAAGCTGTTTAGCAGGCTCTTTGCAAAGAAGGAGATGAGGATTCTGATGGTTGGTCTTGATGCTGCTGGTAAGACCACTATTCTCTACAAGCTCAAGCTCGGAGAGATTGTCACCACCATCCCCACTATTGGTTTCAATGTGGAAACTGTGGAGTACAAGAACATCAGTTTCACTGTGTGGGATGTCGGAGGTCAGGACAAGATCCGTCCCTTGTGGAGGCATTACTTCCAGAACACTCAGGGTCTGATCTTTGTCGTGGACAGCAACGACAGAGACCGTGTTGTTGAGGCTCGAGATGAACTTCACAG…	800	1	AT1G70490.2	ATARFA1D	A member of ARF GTPase family. A thaliana has 21 members of this family, known to be essential for vesicle coating and uncoating and functions in GTP-binding. Gene encoding ADP-ribosylation factor and similar to other ARFs and ARF-like proteins. The gene	Identical to ADP-ribosylation factor 2 (ARF2-B) [Arabidopsis Thaliana] (GB:Q9SRC3;GB:Q9S9K6;GB:Q9SGY6); similar to ATARF/ATARF1/ATARFA1A (ADP-RIBOSYLATION FACTOR 1), GTP binding / phospholipase activator/ protein binding [Arabidopsis thaliana] (TAIR:AT1G	100	181	0	0	74	616	1	181	1e-101	365
MMN1.Contig_1058	TACCACGGGGGGGGGAATAATAATAATAATAAAAATTCAATTATCAAAATCATCCGCCGTCTTCCCTTCACCGGATCACCTTCCTTCCTTCCTTCCTTTGGATCTATCTTCCGATTCCGACGGTTCTTCGTTTCTCAGAGTATCAATAATCAATCTACCTTGGAACAATGAGTGAGGTGTTTAACGGATACGAGCGCCAATACTGCGACCTCTCGGCCAACCTCTCCAAGAAATGCTCCTCTGCTCTTGCCCTTGACGGAGAACAAAAGAAGCAGAAGCTCTCTGAGATAAGATCTGGCCTCGATAATGCTGAAGCATTGATTAGGAAAATGGATGTTGAGGCGAGGAGCCTTCCACCGAGCATTAGGACCAGCCTCCTTGTTAAACTAAGAGAGTTCA…	767	1	AT5G39510.1	ATVTI11/ATVTI1A/SGR4/VTI11/VTI1A/ZIG (VESICLE TRANSPORT V-SNARE 11); receptor	Encodes a member of SNARE gene family. Homologous with yeast VTI1 and is involved in vesicle transport. Mutant alleles such as sgr4/zig are defective in the shoots response to gravity resulting in a zigzag growth pattern of the stem. Involved in protein	Identical to Vesicle transport v-SNARE 11 (VTI11) [Arabidopsis Thaliana] (GB:Q9SEL6;GB:Q9FLY4); similar to VTI13 (vesicle transport v-SNARE 13), SNARE binding / receptor [Arabidopsis thaliana] (TAIR:AT3G29100.1); similar to vesicle transport v-SNARE 11-l	80.98	184	35	0	168	719	1	184	5e-84	303
MMN1.Contig_1059	GACATCCAACACACACAAGATCATATTCAGAAGACAAAAAAAAAGGCAACAAAAGATGAACTTCCTCTCCGATCAGGTCAAGAAATTCTCCGACTCCAAACCGGAGGAGCCAGACCACAACAAGCCCGTCGAAGGAACCGAAGCAGCCAACAGACCAGCTTCTTCCTCCGAGCTCATGGCTAGTGCCAAGGTTGTAGCCGAAGCTGCTCAAGCCGCGGCTCGTAACGAATCAGACAAACTCGACAAGGCTAAAGTCGCTGGAGCCAGCGCTGATATCTTGGATGCTGCCCAAAAATACGGAAAGCTCGATGAAAAGAGCGGCGCTGGTCAGTACCTCGAGAAGGCCGAGAAGTATCTAAGCGATTTCGAATCCTCACATTCTTCCGGCGGCGCCGGTAC…	706	1	AT1G13930.1			similar to nodulin-related [Arabidopsis thaliana] (TAIR:AT2G03440.1); similar to hypothetical protein [Vitis vinifera] (GB:CAN63832.1)	83.64	110	18	0	56	385	1	110	3e-39	158
MMN1.Contig_106	GATTCTSCTTCACAAATCGAAAAACAATCTTCTCAATTYTCTAATTTACGATCAAGATGCAGATCTTCGTCAAGACTCTCACCGGGAAGACGATCACCCTCGAGGTGGAAAGCTCCGACACCATCGACAACGTCAAAGCCAAGATCCAGGATAAGGAAGGCATTCCCCCGGATCAGCAGAGGTTGATCTTCGCCGGAAAGCAGCTTGAAGACGGTAGAACTCTCGCTGACTACAACATCCAGAAGGAGTCTACTCTCCACTTGGTGTTGCGTCTGCGTGGAGGCATGCAGATCTTTGTCAAGACACTGACGGGAAAGACGATCACTCTAGAGGTCGAGAGTTCCGACACCATTGACAACGTGAAAGCCAAGATCCAAGACAAGGAAGGTATTCCTCCGG…	772	2	AT4G05320.4	UBQ10 (POLYUBIQUITIN 10); protein binding	One of five polyubiquitin genes in A. thaliana. These genes encode the highly conserved 76-amino acid protein ubiquitin that is covalently attached to substrate proteins targeting most for degradation. Polyubiquitin genes are characterized by the presenc	similar to UBQ4 (ubiquitin 4), protein binding [Arabidopsis thaliana] (TAIR:AT5G20620.1); similar to hexaubiquitin protein [Helianthus annuus] (GB:CAA40324.1); similar to hypothetical protein OsI_005817 [Oryza sativa (indica cultivar-group)] (GB:EAY84584.	98.41	189	3	0	57	623	229	417	6e-115	358
MMN1.Contig_1060	CCGCAACGTTGGTTCTTTCGATAAGAACGATCCCACCGTCGGCACGGGTCTCGTGGGGGCTCCCGCCTGCGGTGATGTAATGAAGCTTCAAATCAAGGTCGATGAGAAGACCGGTCAAATCGTCGATGCTCGCTTCAAGACCTTTGGTTGTGGCTCCGCCATCGCCTCTTCATCTGTCGCCACTGAATGGGTGAAACGGAAAGCTCTGGAGGAAGTCCTGACCATCAAGATCACCGAAATCGCGAAGCATCTTTCTCTCCCACCGGTGAAGCTCCATTGCAGTATGTTGGCCGAGGACGCCATCTAGGCCGCTGTGACACACTGCAAGGAGAAGCGTGTGAAGACAAATGGTGCTTGAGAAATCGCGCACGCTTGATTCCTTATGTGTATATGATGGTG…	773	1	AT4G22220.1	ISU1 (Iron-sulfur cluster assembly complex protein)	Encodes a mitochondrial protein similar to E.coli IscU. In bacteria, IscU is a scaffold protein accepting sulfur and iron to build a transient Fe-S cluster,which is subsequently transferred to a target apoprotein.	similar to ATISU3/ISU3 (IscU-like 3), structural molecule [Arabidopsis thaliana] (TAIR:AT4G04080.1); similar to unnamed protein product [Vitis vinifera] (GB:CAO66090.1); contains InterPro domain NIF system FeS cluster assembly, NifU, N-terminal; (InterPro	92.37	118	9	0	2	355	41	158	6e-56	214
MMN1.Contig_1061	CAAGAATGACAAATCTGTGAAAGATCTTGTTCTCCTCCTCTTTGAGACTGCTCTTCTGACTTCCGGTTTCAGCCTAGACGAGCCAAACACTTTTGGGAGCAGAATCCACGGGATGTTGAAGCTGGGACTGAGCATTGACGAGGATGATGCAGTCGAAGCTGATGCAGAGATGCCCCCGCTTGAGGATGATGCCGATGCTGAAGGCAGCAAGATGGAGGAGGTCGACTAAAAACTTCTGTCTGCAGCTAATGATTTTTCTTAGCTTTTCTGTTGTCGCTTTCTGTCCTTAAAACTATTTCTTCTGGTTTTTGCCCTTTTTATCTTCTAGAGTATTATAACCTGTGTTGGTTTTTCTCAAAAAAAAAAAA	368	1	AT5G56010.1	HSP81-3 (Heat shock protein 81-3); ATP binding	a member of heat shock protein 90 (HSP90) gene family. Expressed in all tissues and abundant in root apical meristem, pollen and tapetum. Expression is NOT heat-induced but induced by IAA and NaCl.	Identical to Heat shock protein 81-3 (HSP81-3) [Arabidopsis Thaliana] (GB:P51818;GB:O03985;GB:Q8VYT8;GB:Q94A60;GB:Q9FKU5); similar to heat shock protein 81-4 (HSP81-4) [Arabidopsis thaliana] (TAIR:AT5G56000.1); similar to HSP81-1 (HEAT SHOCK PROTEIN 81-1	94.67	75	4	0	2	226	625	699	1e-21	98.2
MMN1.Contig_1062	GATAGCTGCAGGTTCGTCTCTTCCTTCCCTTTCACTTAACCTTTCTTGGTCTCGAAGCAGAGTAAAAAAAAAAAGCTTGGGCTAAAAAGATGGCGTCTTTGGGTGTGTCGGAAATGCTTGGTACGCCCCTTAACTTCAGGGCAGTGTCGTGACCGTCTGCTCCATTGGCGTCAATTCCCGCCACGTTCAAGACAGTTGCTCTGTTCTCCAAGAAGAAGCCAGCTCCTCCTCCCAAGGCCAAGACCGTCTCTGCTGCCAACGACGAGCTCGCCAAGTGGTATGGCCCTGACAGGAGAATCTTCTTGCCGGATGGTCTTTTGGACAGATCAGAAATCCCAGAGTACTTGAACGGTGAAGTTGCTGGAGACTATGGATATGACCCATTTGGACTTGGCAAGA…	773	1	AT4G10340.1	LHCB5 (LIGHT HARVESTING COMPLEX OF PHOTOSYSTEM II 5); chlorophyll binding	photosystem II encoding the light-harvesting chlorophyll a/b binding protein CP26 of the antenna system of the photosynthetic apparatus	Identical to Chlorophyll a-b binding protein CP26, chloroplast precursor (LHCB5) [Arabidopsis Thaliana] (GB:Q9XF89;GB:Q8LAB1); similar to LHCB2.1 (Photosystem II light harvesting complex gene 2.1), chlorophyll binding [Arabidopsis thaliana] (TAIR:AT2G051	91.03	223	20	1	96	764	3	224	7e-94	340
MMN1.Contig_1063	AAGGCAAACGGAACAAAAGATGAGAAGGCAGGAGATATCGAAGAGGAAGATAAAAAGGTGGAGACTGTTGATGAAAATAACAAGGAGCAGAATAAGGAGGAGGATTTGAC	110	1	no significant hit
MMN1.Contig_1064	GACCTTCAACCGCACCCAACCACTACAAAAATTCAGTCCATTCACCAACCAAAGCTCTCTTCGTCAACTCTTCGTCCACAAACGTTTACATATGTTTCTTAAGGTCTTTCTACAGCTTAAGACGCCGTGAAACAGCATATGTGTGTCGTCCTTGGTTCTGAAATTGCTTGGCTTTCATCCTCTTGATGGAAATACAACAAACATTGGTATGTTATTTCTTCATATCAAAATATGCAAGTTTTGCAATATCCTTCTGGTATATGTGTTTACAATTGGACAATTTCTTATCTGATTATCACGAATGCTTATGCGTCCTTTTAGAACTCACGATGATGTCCACATCAACTTTGGCATACTCGTCTCAATGGCTCTATACGGCAACTTTCCGACTCTGCTAGG…	426	1	AT4G22753.1	SMO1-3 (STEROL 4-ALPHA METHYL OXIDASE); catalytic	Encodes a member of the SMO1 family of sterol 4alpha-methyl oxidases.	similar to SMO1-2 (STEROL C4-METHYL OXIDASE), catalytic [Arabidopsis thaliana] (TAIR:AT4G22756.1); similar to Os10g0545200 [Oryza sativa (japonica cultivar-group)] (GB:NP_001065206.1); similar to hypothetical protein OsI_033362 [Oryza sativa (indica culti	46.43	28	15	0	183	266	121	148	1.6	28.5
MMN1.Contig_1065	GCTGTTCCAATTCGTTCCGAAACAATCTTCTCAATTCCTTTCGGTTATTATAATCTGAGTTTAAAAAAACAATGGGAGGAGGTAAAGACAAGCATGGAGGCAAGTTCAAGCATGGAAAGCACGGGAAACATGGTATGTTTGGAGGAGGAGGAGGCAAATTCAAGAAGTGGAAGTAATCTAAAGAAACCACCCTTTCATTCTCTCCTCCAGTAGTCTCATTTACCTGACCGATGTTTTCTAATAATCCCCTCCAAACACATTATATATTAACTATATCGGTTTAGAGATTACTGGTTCAGAGGAAATAAATGGAGAGTGGTAGTATAATGTAAACCTTATGGTATCTGCAGAAGAGGTTTCTTCAATCTCTTAATAGCAGATGCCCTGAAACTTATCTAT…	440	1	AT3G57960.1	emsy N terminus domain-containing protein / ENT domain-containing protein		similar to emsy N terminus domain-containing protein / ENT domain-containing protein [Arabidopsis thaliana] (TAIR:AT3G57970.1); contains InterPro domain ENT (InterPro:IPR005491)	41.38	29	17	0	124	210	23	51	0.59	30
MMN1.Contig_1066	GGAACAGGTCAGGTCGGATGAGGAACTCAAAGAATGGTGGAATGAAGTGAAGAACATAGGGCATGGAGACAAGAAAAATGAACCATGGTGGCCTGATCTCAAAACCCAAGATGACTTGATTGGCGTGGTGACTACGATTGCATGGGTGGCTTCAGGTCACCATGCAGCTGTAAACTTTGGACAGTATGGGTATGGTGGATACTTTCCTAACCGACCAACCACATCAAGGAAAAAAAATGCCAGTGGAAGAACCGACAGAGGACGAGCTAAAAGAGTTCTATGAGGAGCCAGAGAAGACCATGCTTAAGACATTCCCCTCGAAGAAGCAGGCGACCACAGTGATGTTTACTTTGGATCTTCTATCTGCACATTCACCAGATGAAGAGTACCTAGGAGAAA…	757	1	AT3G45140.1	LOX2 (LIPOXYGENASE 2)	Chloroplast lipoxygenase required for wound-induced jasmonic acid accumulation in Arabidopsis.Mutants are resistant to Staphylococcus aureus and accumulate salicylic acid upon infection.	Identical to Lipoxygenase, chloroplast precursor (LOX2) [Arabidopsis Thaliana] (GB:P38418;GB:Q8W4E4;GB:Q9M1U5); similar to lipoxygenase family protein [Arabidopsis thaliana] (TAIR:AT1G67560.1); similar to lipoxygenase, putative [Arabidopsis thaliana] (TA	85.53	76	11	0	2	229	693	768	4e-92	150
MMN1.Contig_1067	GTTCCTGATAGAAAATGACGACTCCTTTAGAAAAACGAAGTTATTCAAGTTCTTTTTCCCAAAGAAGTCCCGCTCTGACGGCCCGACGAGTTATCTACGGACCCTCCCTGTAGTGCGCCCCTCCTTGAATTTTTTGGTCATGCAATACTTTTTTAATACAAAGAACCAAATGAATTTCGACCCCGTCGTAGTTCTCAATCATTTCGTGGCACCGGGCGCGGCTGAACCATCTACGATGGGGAGAGCGAATGCACAGGGAAGAAGCTTACAGAAGAGAATACGTTCTCGTATCGCTTTTTTTGTAGAAAGCTTGACCAGCGAGAAAAAGTGTTTGGCCGAAGCCAAAAATAGGTTGACCCACTTCATTCGCTTGGCGAATGATCTTCGCTTCGCGGGAAC…	667	1	ATMG00090.1		ribosomal protein S3	Identical to Mitochondrial ribosomal protein S3 (RPS3) [Arabidopsis Thaliana] (GB:Q95749); similar to ribosomal protein S3 [Brassica napus] (GB:CAA45192.1); similar to ribosomal protein S3 [Brassica napus] (GB:YP_717168.1); similar to Mitochondrial riboso	80.8	224	41	2	2	667	193	416	1e-79	292
MMN1.Contig_1068	GGTAGAGATCAGAAGAAGAGCTATCAATTCTCCATTCGAATTTCGAAGGTCACTTTCATTTTTTCCCTCGGAATCTCTCTCAACGATTCCAAACCTTACTTCTCTGAGCTCTTCGCAGGATCCATGGATATATCTTCTTCCTCTTTCCATCAAGCTCACAAAGTCTCTCTCTTGCGTCGTCAACCCTCTTCCCCGGTCAACTCTGTCCCCGTCATCGGATTCTCGCTTCCGCGGATCACTTCTCCTTCTCTAGCTAAATATCGCCGGAAAGGGAGCTCTACCGGGTTTGTAAGAGCTTGTGTTGCTGTGGAAGAGAAGAAACGAACTGCTATCATCAGAATTGGTACACGGGGAAGTCCTCTAGCTCTTGCTCAAGCCTACGAGACACGAGCCAAGCTC…	725	1	AT5G08280.1	HEMC (HYDROXYMETHYLBILANE SYNTHASE); hydroxymethylbilane synthase	Encodes a protein with porphobilinogen deaminase activity. This protein is targeted to the chloroplast.	Identical to Porphobilinogen deaminase, chloroplast precursor (HEMC) [Arabidopsis Thaliana] (GB:Q43316); similar to Porphobilinogen deaminase, chloroplast precursor (PBG) (Hydroxymethylbilane synthase) (HMBS) (Pre-uroporphyrinogen synthase) (GB:Q43082);	85.29	204	25	2	124	720	1	203	3e-90	328
MMN1.Contig_1069	GCTGAGCAAAAACCCTAGAAAATCCCATTCTCCGTCGATCAAAGCAAGACGATGACTGGTCCCAACACTGTTTCTGATTTATTTTTCTGGGGTTTAGTGGTGTGAGTTAGCGAGGTGATGAACATCGTTCGGACATTGACGAGAGCAAAGTCAAAGCACCGAACATCTTCGAACGAGCCAAAGAGGAGATCGATGCTGTTATTGGTGCTATTCATCAACGCAAGAGTTCCAGGGACGAATCTGACAAGGTAGAATTCAAATCCGAGGAGAAACCGAATATGATGAGAAAGGCCAAGGAAGAAATCAAATCTCTCTTCCATTCCAAGGAGAAACCTCATCGCCATCATCACCACAAAGAAACTCATGGAAGGAGTGATGATATCGACGAGAACACGCCTG…	681	1	AT5G57000.2			similar to unknown protein [Arabidopsis thaliana] (TAIR:AT1G72690.1); similar to unnamed protein product [Vitis vinifera] (GB:CAO65331.1)	50	44	22	0	111	242	104	147	8e-06	47.4
MMN1.Contig_107	ATTCTCCTTCACAAATCGAAAAACAATCTTCTCAATTCTCTAATTTACGATCAAGATGCAGATCTTCGTCAAGACTCTCACCGGGAAGACGATCACCCTCGAGGTGGAAAGCTCCGACACCATCGACAACGTCAAAGCCAAGATCCAGGATAAGGAAGGCATTCCCCCGGATCAGCAGAGGTWGATCTTCGCCGGAAAGCAGCTTGAAGACGGTAGAACTCTCGCTGACTACAACATCCAGAAGGAGTCTACTCTCCACTTGGTGTTGCGTCTGCGTGGAGGCATGCAGATCTTTGTCAAGACACTGACGGGAAAGACGATCACTCTAGAGGTCGAGAGTTCCGACACCATTGACAACGTGAAAGCCAAGATCCAAGACAAGGAAGGTATTCCTCCGGA…	945	3	AT4G02890.4	UBQ14 (ubiquitin 14)	Polyubiquitin gene containing 4 ubiquitin repeats.	similar to UBQ3 (POLYUBIQUITIN 3), protein binding [Arabidopsis thaliana] (TAIR:AT5G03240.3); similar to UBQ3 (POLYUBIQUITIN 3), protein binding [Arabidopsis thaliana] (TAIR:AT5G03240.2); similar to UBQ4 (ubiquitin 4), protein binding [Arabidopsis thalian	93.12	247	17	0	2	742	59	305	5e-125	444
MMN1.Contig_1070	GAAAACTTATCCTCTTTTGTTCCATTTTCAAATTAAAAACCTGCTCCTATATTTCTGTTTTCCTTTTCTTTTTTTCTTAAAAAGAAATTTGTGATTTCTAAATTCATATCCAATATGAACTAACTAGCACTGTTACTATCTAAGAACATGAACTAGTGACCGAGGAGCTACATCTGAAATCACTCTAATACATAGACTCTAAATATAAAATCCATCCTCAACCACATCCCCAATCACCACTGTATTCATATGCTCATCATTCTTATTCATACTACTGGTCCGACTAACATCTCCACCTTCCATGCTAACTACCATGAGATTGATACTGGTGACATTGTTTCTTGCCCTTTATATGTACTCTACACTTTCACAGGTGTGCCTGCATGTATGTCTATGCAT…	512	1	AT5G66985.1	unknown protein			48.28	58	29	1	178	348	26	83	0.0008	40
MMN1.Contig_1071	GGATCGACAGGGAGAGAATCAGATTCCTCTGAGAAGACTCTAATCGAAGATACTTGGCCTCGCCGCCGCGACAAAGGAACCATTTTGGAATTGCTTGAGGAGTCTGAAAGGAGTTAACTTTGATTCTCGTACTCGAATCTAAGCAAATGGCGTCTTCGTTCTGGAACGTAGCTTATCAACAAGCCATGAGAAGCGGTGTGTTTGTGGCGAAAGTCTACTCCTTTCTCCATGTAACCACTAACTATCTCGCCTTCCCTGCTTATGCTTTTGGTCCGAGCATGATCCCCACGCTTCATCCTTCGGGGAATGTCGTGCTGGCCGAACGAATCTCCAAACCGAGTCGTGGAGATGTCGTTGTCTTTCAATCTCCTGAAGATCCTAACAAGCTTCCGACCAAGA…	727	1	AT1G29960.1	AGL64; peptidase		similar to signal peptidase-related [Arabidopsis thaliana] (TAIR:AT1G23465.1); similar to unknown [Populus trichocarpa] (GB:ABK93323.1); contains InterPro domain Peptidase S26A, signal peptidase I; (InterPro:IPR000223); contains InterPro domain Peptidase	73.33	165	40	1	150	632	5	169	3e-70	261
MMN1.Contig_1072	GCTGTGAAGGATCTCAAGCGTGGGTACGTTGCATCCAACTCCAAGGATGACCCTGCTAAGGGTGCTGCTAACTTCACTTCCCAGGTCATCATCATGAACCACCCTGGTCAGATTGGTAACGGTTACGCTCCAGTTCTTGACTGGCCACACCTCCCACATTGCCGTCAAGTTCTCTGAGATCTTCACGAAGATTGACAGGCGTTCTGGAAAAGAGATCGAGAAGGAGCCCAAGTTCTTGAAGAATGGTGACGCTGGTATGGTGAAGATGACTCCAACCAAGCCCATGGTTGTTGAGACCTTCTCCGAGTACCCACCCCTTGGACGTTTCGCTGTTAGGGACATGAGGCAGACTGTTGCAGTCGGTGTCATCAAGAGCGTTGACAAGAAGGACCCAACGGG…	712	1	AT5G60390.3	elongation factor 1-alpha / EF-1-alpha		Identical to Elongation factor 1-alpha (A4) [Arabidopsis Thaliana] (GB:P13905); similar to elongation factor 1-alpha / EF-1-alpha [Arabidopsis thaliana] (TAIR:AT1G07940.1); similar to elongation factor 1-alpha / EF-1-alpha [Arabidopsis thaliana] (TAIR:AT	100	47	0	0	1	141	304	350	1e-64	98.6
MMN1.Contig_1073	CGCTATGAGACTTTCTGGAAGGAAGTAGACTACGCAAAGAACTTGTGGAAGAACAGATCCGATCTGAAGGTAGAAGATGCAGGAATTGCTGCATTGTTTGGTCTCGAATGCTTTGCATGGTACTGCGCAGGAGAAATCGCCGGAAGAGGATTCACCTTCACCGGCTACTACCCTTGAAAGAGAGGAACAATAACTTGAACAAGATTGTGTAATCTGAATCGATTTTTTTTTTTTACAAGTTTTTCCCTGAAACGGAAACAGAGTATTTGGATCTGAGAAAATTTCCATTTTGCTAAAACTCTCTTTGATAAGGTTGAGATTAATAAAGAACAAAAATTTCC	341	1	AT4G29480.1	mitochondrial ATP synthase g subunit family protein		similar to mitochondrial ATP synthase g subunit family protein [Arabidopsis thaliana] (TAIR:AT2G19680.1); similar to mitochondrial ATP synthase g subunit family protein [Arabidopsis thaliana] (TAIR:AT2G19680.2); similar to unknown [Solanum tuberosum] (GB:	98.28	58	1	0	1	174	65	122	9e-31	128
MMN1.Contig_1074	GAGTGTATGGAATGTATCATTTCTTGGATATCCTGCCAGGGCCATCTTACCTTACTCCCAAGCCCTTGAGAAATTTGCTCCGCATATTCAACAGGTTAGTATGGAGAGTAATGGAAAGGGAGTTTCAATTGATGGTCTACCTCTCCCGTTCGAGACTGGTGAGATTGATTTTGGTGAACCTGGAACAAATGGCCAACACAGCTTTTACCAACTCATTCACCAGGGACGCGTAATCCCTTGTGATTTCATTGGCACTGTGAAGAGTCAGCAACCTGTGTACTTGGAGGGAGAGGTTGTCAGTAACTATGACGAGCTTATGTCCAACTTTTTTGCTCAGCCTGATGCTCTTGCATATGGAAAAACACCTGAACAGCTGCAGAAAGAGAATGCTTCAGAGAG…	753	1	AT5G42740.1	glucose-6-phosphate isomerase, cytosolic (PGIC)		Identical to Glucose-6-phosphate isomerase, cytosolic (PGIC) [Arabidopsis Thaliana] (GB:Q9FXN0;GB:Q9FXN1;GB:Q9FXN2;GB:Q9FXN3;GB:Q9FXN4;GB:Q9FXN5); similar to PGI1 (CHLOROPLASTIC PHOSPHOGLUCOSE ISOMERASE) [Arabidopsis thaliana] (TAIR:AT4G24620.2); similar	96.15	234	9	0	2	703	327	560	3e-123	437
MMN1.Contig_1075	GATTCTCTGCTGTGATTGAAACTTCTTACGTCAGGAAGGAGAAGAGATAATGTCTCAGACTGTGGTTCTAAAGGTGGCTATGCCATGTGAGGGATGTGTGGGAGCTGTGAAAAGAGTCCTAGGCAAAATGCAAGGTGTGGAGTCATTTGATGTGGATCTCAAAGAGCAGAAGGTAACTGTGAAAGGCAACGTGGAGCCAGAAGCTGTCCTGCAGACAGTCTCAAAGACTGGAAAGAAAACCAGTTTCTGGGGTGCCGACGAGGCTGAGACCGCCAAGGCCTAAACTGAAAGAAGCAATAAAGCATCTCTGTTATATCAGAGATTCCTACCCT	332	1	AT1G66240.1	ATX1; metal ion binding		similar to CCH (COPPER CHAPERONE) [Arabidopsis thaliana] (TAIR:AT3G56240.1); similar to copper chaperone [Populus alba x Populus tremula var. glandulosa] (GB:AAT12488.1); contains InterPro domain Heavy metal transport/detoxification protein; (InterPro:IPR	85.71	70	10	0	50	259	31	100	3e-30	126
MMN1.Contig_1076	GACCGACTGAACCTTTTTTTCATCTTCTTCTTGTTCTCTGCTCTCCTCGTCACTTTATTTTCTTTTTCTTTTTTCCTCTTACGTCTCTCTTAGTCTTCTTTATCTTCATGTACTTATGCTATTTCTAACTGATTTTTGTTTTGTTTACAGATCTGAGAAGGACCAGTGATGAAACGGGAAGCGGAAGTGGTGGTGTAACGGAGCATACGCGCCGGAGGTGGTGGTGGCGTGACGAATCGGAGGAACCGCAGATGCTGTATGTATCAGACCAACAGCAGTGGCTTCCCGACCAGATCCAGTCGTCGCTTCAGATGGAACCACTCCGAGTCGTCGTGGTGCCGTTCAACCGGAGCCGGTGGAGAAGCCGGTGGCGGAATCCGTGCCGCCGTGGCTGAACCC…	494	1	AT2G14890.1	AGP9 (ARABINOGALACTAN PROTEIN 9)	putative proline-rich protein (At2g14890) mRNA, complete	Identical to Classical arabinogalactan protein 9 precursor (AGP9) [Arabidopsis Thaliana] (GB:Q9C5S0;GB:O82327); contains InterPro domain Glutelin; (InterPro:IPR000480)	31.48	54	37	0	239	400	17	70	0.76	30
MMN1.Contig_1077	GAGAGAGATGCAGATCTTCGTGAAAACCCTCACCGGAAAAACGATAACCCTAGAGGTTGAGAGCAGCGACACCATCGACAATGTCAAAGCCAAAATCCAGGACAAAGAAGGTATTCCACCAGACCAACAAAGGCTCATCTTCGCCGGTAAGCAGCTTGAAGACGGCCGAACCCTAGCCGATTACAACATCCAGAAAGAGTCTACGCTTCATCTCGTCTTGAGGCTCCGTGGTGGTACCATGATCAAGGTCAAGACCCTCACTGGCAAAGAGATCGAGATTGATATCGAACCAACAGATACTATTGATCGTATCAAGGAACGTGTTGAAGAGAAGGAAGGCATCCCTCCCGCCCAACAAAGGCTTATCTATGCTGGAAAACAGCTTGCTGATGACAAGAC…	634	1	AT1G31340.1	RUB1 (RELATED TO UBIQUITIN 1)	Encodes a ubiquitin-related protein that is conjugated to target proteins by neddylation. It has been shown to be conjugated to the cullin AtCUL1. The RUB-conjugation pathway has been implicated in in auxin response.	Identical to NEDD8-like protein RUB1 precursor (RUB1) [Arabidopsis Thaliana] (GB:Q9SHE7;GB:Q0WQU3); similar to UBQ7 (RELATED TO UBIQUITIN 2) [Arabidopsis thaliana] (TAIR:AT2G35635.1); similar to Os09g0420800 [Oryza sativa (japonica cultivar-group)] (GB:N	99.31	144	1	0	8	439	1	144	6e-66	246
MMN1.Contig_1078	GAACTTTCCTTCACTCTCTCGCACTTTCTCATACATAACCTCTAAAGGATGTCACTTTCTTTTCCCTTCAACGTCTTCGCTTCCTCTTCCTACACACCCAAACCCAAAACCTTCCTCAGAGATTCCAAACTCCTCTCACGATCTCAGCAGCTAAACTCGTACTCGTTTCCTCTCGCTTCCACCTTCCAAACCAATGAACCCTCGAAGAATCTCAGACTCAAACCAGTTTCATCTCTTGAGACCGCGACATCGTCTTCTTCTTCGTCCTCCAACTTCAGGAACAAAAGCCCCAGCGAGATAAACATTCTAGTCGTCGGCTCCACCGGGTACATAGGCAGATTCGTGGTTCAAGAGCTCGTCAAAAGAGGCTTCAACGTGATCGCAGTTGCAAGAGAGAAG…	689	1	AT5G18660.1	DVR (PALE-GREEN AND CHLOROPHYLL B REDUCED 2); 3,8-divinyl protochlorophyllide a 8-vinyl reductase	Encodes a protein with 3,8-divinyl protochlorophyllide a 8-vinyl reductase activity. Mutants accumulate divinyl chlorophyll rather than monovinyl chlorophyll.	similar to binding / catalytic/ coenzyme binding [Arabidopsis thaliana] (TAIR:AT3G18890.1); similar to flavin reductase-related [Arabidopsis thaliana] (TAIR:AT2G34460.1); similar to unnamed protein product [Vitis vinifera] (GB:CAO71019.1); contains InterP	73.85	218	52	3	49	687	1	213	1e-75	279
MMN1.Contig_1079	TGTCTTTCCATGACCATTAAATAATAAACAAAGCTTCTTTGCCATTGTGTTGCAGAGGATGTGACTCCAATTCCAACCGATAGCACCCGTAGAAAGGGTGGTAGAAGGGGAAGACGTCTTTGATTTGTTTCTTTCTCACAATCTCTCATTTTTTGGTGCTTCTTCTAAATGCCCCACAATTCTTGTTGCTATTGTTTTAAAAGCTTTGCATTTCATTTCTTTTATACGATACATCACTGAAGATGTTTAATTAAAGATAACTCTTTTTATGAAGCAATCAAATTAGTCTGTGAAAATCTATTTAGTTGTCTAGCTAACCC	320	1	AT3G52580.1	40S ribosomal protein S14 (RPS14C)		Identical to 40S ribosomal protein S14-3 (RPS14C) [Arabidopsis Thaliana] (GB:P42036;GB:Q9SVD9); similar to 40S ribosomal protein S14 (RPS14B) [Arabidopsis thaliana] (TAIR:AT3G11510.1); similar to cytoplasmic ribosomal protein S14 [Brassica napus] (GB:AAO4	100	11	0	0	55	87	129	139	2.9	26.9
MMN1.Contig_108	GAATATCAACTCACCACAACCTTCTCTCTTACTCGTCACTCTTTCTTTTATATTCCTCTCCATCTAGCTATAAGTTATAAATTAATAAATAAGAATAAAATGGACAAAAGAGGAGGAATATGTAGTGGAGGTTCGGGATCATCAGGAGAAACAGAGGTGAGAAAGGGACCGTGGACGATGGAAGAAGATCTTATTCTTATCAACTATATCGCCAACCACGGCGATGGCGTTTGGAACACTCTCGCCAAATCTGCAGGTCTAAAACGCACCGGGAAAAGTTGCCGGCTCCGGTGGCTGAACTATCTCCGCCCTGACGTACGACGTGGAAACATCACGCCGGAGGAGCAACTTATCATCATGGAACTTCATGCTAAGTGGGGAAACAGGTGGTCAAAAATC…	1125	7	AT3G27810.1	ATMYB21 (MYB DOMAIN PROTEIN 21); DNA binding / transcription factor	Encodes a member of the R2R3-MYB transcription factor gene family. Induced by jasmonate. Involved in jasmonate response during stamen development.	Identical to Transcription factor MYB21 (MYB21) [Arabidopsis Thaliana] (GB:Q9LK95;GB:O22684;GB:Q9SBG4); similar to MYB24 (myb domain protein 24), DNA binding / transcription factor [Arabidopsis thaliana] (TAIR:AT5G40350.1); similar to MYB transcription f	87.55	233	28	3	100	795	1	226	1e-109	393
MMN1.Contig_1080	GATGTGAGAGCATCTTCTTATTCAGCTTTTGTGTTCTCTTTTATATTTGGCTGATACTGATAAACAAGCATAAGTTTTTCTTTATAGACAATTAAACTAAATACTCTTTCAT	112	1	no significant hit
MMN1.Contig_1081	GAGGTGTAGAATAAGTGGGAGCTCCGGCGCAAGTGAAATACCACTACTTTTAACGTTATTTTACTTACTCCGTGAATCGGAGGCGGGGTAACAACCCCTTCTTTTAGACCCAAGACTCGCTTCGGCGGGTCGATCCGGGCGGAGGACATTGTCAGGTGGGGAGTTTGGCTGGGGCGGCACATCTGTTAAAAGATAACGCAGGTGTCCTAAGATGAGCTCAACGAGAACAGAAATCTCGTGTGGAGT	246	1	AT5G50665.1			similar to unknown protein [Arabidopsis thaliana] (TAIR:AT5G50565.1)	38.1	42	26	2	52	177	34	70	8.4	25.4
MMN1.Contig_1082	AGCCGGGAACAAAGTATTCCCTTTAACCAAAACCCTCATCCATTTTTATATAACCACAAGAACTAAAAAAAAAAAAAAGAAGAAACTGCAGATTAATGTTTGCATAAAAATCTGCAGTTTCTGGTTTATATCTTCATGTATAGAAATGAAAAAAAAGAGAGAAAGTCATTTCCCTTGCTTGTTTTTTCAGTCTGTTGTTGTGTTTGTTTCTTGTGTTCATCTTCCGACCACGACCAAGGTTGTCGTTCGGTGGCTGTTTGAAAAGAGTTATTACAGTTACTTTACACCACG	291	1	AT3G53570.4	AFC1 (ARABIDOPSIS FUS3-COMPLEMENTING GENE 1); kinase	a member of a CDC2-related kinase subfamily, the LAMMER kinases. activates STE12-dependent functions in yeast.	Identical to Serine/threonine-protein kinase AFC1 (AFC1) [Arabidopsis Thaliana] (GB:P51566;GB:Q39184); similar to AFC2 (ARABIDOPSIS FUS3-COMPLEMENTING GENE 1), kinase [Arabidopsis thaliana] (TAIR:AT4G24740.1); similar to putative protein kinase (AME2/AFC	89.47	19	1	1	1	54	446	464	0.003	37
MMN1.Contig_1083	GACGCGTCCTCTCTCTATCTCTTAGTTGTCAATTACTCTCTCTCAAGCGATCAGAATTCAAGTTTTGTTTTCCAAAGTTTTTAACCTAAAGACTCGAAAGAAAAACTCAAATGGGTCTTTGTGTATCTGTCGGTCGTAGCGACTGCGATTCTTCTCCGGCGGCTAAAATCGTGACGGTTAACGGCGATCTCCGGGAATACAATGTCCCGGTGTTAGCTTCACAGGTTCTTGAAGCTGAATCAATGGCTTCTTCTTCTTCTTCCTCTCGGCCTTCCTCTTATTTTCTATGTAATTCGGATTCTCTCTATTACGATGACTTCATCCCGGCGATAGAGCCGGAGGAGATTCTTCAGGCGGATCAAATCTATTTCGTTCTCCCTGTCTCCAAACGTCAGTACC…	751	1	AT1G76600.1			similar to unknown protein [Arabidopsis thaliana] (TAIR:AT1G21010.1); similar to hypothetical protein [Vitis vinifera] (GB:CAN67638.1)	73.06	219	52	7	111	746	1	215	1e-64	243
MMN1.Contig_1084	CAGGTTTAGGGATAAAGTGTTGAAGAAAGGTGGAGTTTGGAAAGATATATACGGAATAGATGAGAAAAAGATTGCAAGTATGGTCCGAGATGACGAAATCGATATTTTGGTGGAGCTCACTGGCCATACAGCGAATAACAAGCTGGGAACAATGGCCTGCAGACCAGCACCTGTTCAGGTTACTTGGATCGGCTATCCAAATACTACAGGCTTGCCCACTGTTGATTACAGGATTACGGATTCGTTGGCTGATCCACTAGATACCAAACAGAAACAGGTTGAGGAGCTGGTTAGGCTTCCAGACTGTTTTCTTTGTTACACACCATCCCCAGAAGCTGGTCCTGTTTGTCCAACACCCGCTCTGTCCAATGGCTTTGTCACATTTGGTAGTTTCAACAA…	726	1	AT3G11540.2	SPY (SPINDLY)	Encodes a N-acetyl glucosamine transferase that may glycosylate other molecules involved in GA signaling. Contains a tetratricopeptide repeat region, and a novel carboxy-terminal region. SPY acts as both a repressor of GA responses and as a positive regu	Identical to Probable UDP-N-acetylglucosamine--peptide N- acetylglucosaminyltransferase SPINDLY (SPY) [Arabidopsis Thaliana] (GB:Q96301;GB:Q56YX8); similar to SEC (SECRET AGENT), transferase, transferring glycosyl groups [Arabidopsis thaliana] (TAIR:AT3G	98.34	241	4	0	2	724	348	588	2e-139	491
MMN1.Contig_1085	GTCTCACGGATATGGGGCCTCGCCGGAGATGGCAGGGCAAAACCTGATGGACCTTTTTTTTTTCTCAAGAGGTTATTTCGAGAATCAACCAACCGACGAGACAAATTCGAGGATGTGTTAAAATAAAGTCTAACCGCCAAGGCAAGTCCCATGGATAAGCCCAGCCTCCCTCTCGTTTCACTCTCGAGGAACGCCTTTTCAGTCGAGTTGCTAAAGCACCTCTCCTTACAGTCGAGCTTCTTTGTTCCTTCGGACCTCTCGCTCA	265	1	AT2G22950.1	calcium-transporting ATPase, plasma membrane-type, putative / Ca2+-ATPase, putative (ACA7)		Identical to Putative calcium-transporting ATPase 7, plasma membrane-type (ACA7) [Arabidopsis Thaliana] (GB:O64806); similar to ACA2 (CALCIUM ATPASE 2), calmodulin binding [Arabidopsis thaliana] (TAIR:AT4G37640.1); similar to ACA11 (AUTOINHIBITED CA2+-AT	32.14	56	38	2	1	168	691	739	3.7	26.6
MMN1.Contig_1086	GATAACTTCATATGTTCCTGATCATTCCCGAAGCTAATTCCTCTCCTCCTTGGCTTGGCTCTTCGAGAAAGATCGTGGAAGTCTTCGTCTGAGGGACAAGAATCCTAGGCTGTGCCCGAAGCTTCAAGCTATGGCTGTCACCAAGATTTATATAGTGTACTACTCGTTGCACGGCCACGTGGAGACAATGGCAAGAGAGGTACTCAGAGGAGCGAACGAAGTTCCAGACGTGGAGGCAACTCTCTGGCAAATACCAGAGACGTTACCTGAGAAGATACTTGAGAAAGTGAAGGCTGCTCCAAGACCGGACGATGTGCCGGAGATTCAAGGGGAGCAGCTAGGTGAAGCTGATGGGTTCATGTTCGGTTTCCCTTCCAGGTTTGGAGTGATGGCGTCACA…	749	1	AT5G58800.2	quinone reductase family protein		similar to quinone reductase family protein [Arabidopsis thaliana] (TAIR:AT4G27270.1); similar to unnamed protein product [Vitis vinifera] (GB:CAO21486.1); contains InterPro domain Flavodoxin/nitric oxide synthase; (InterPro:IPR008254)	92.72	206	15	0	131	748	1	206	4e-112	400
MMN1.Contig_1087	GAGATTCAGATTGAACAAAGTCTCTGTCTTTCGGTGGGGGGTTTGTGAGATTCATGGGGTTTGAAATGAAACAAGAGAAAGATGTTTTGAGTAAAGATCAATGTAAAGTTAAAAGCCCTAATCCAAACTCTGTTAATTCACCTCATATCAAGAAAAAGAAGAAGAAGAAGGATAAGGATAAGACGAAGAAGAGGGGGATGCGACGGAAGAGGAGTGATTCTCCGGCGGATGAGATCACTCCGGTGCGGCGGCTGTTTGATACCTGCAAGGAAGTGTTCTCCAGTGGCGGTCCTGGAGTTATTCCTTCTGAAGATAAAATCCAACAGCTACGAGACATTCTTGATAATATGAAAACAGAGGATGTCGGGTTAGCTCCGACCATGCCCTATTTCCGACCAG…	752	1	AT5G15120.1			similar to unknown protein [Arabidopsis thaliana] (TAIR:AT5G39890.1); similar to unnamed protein product [Vitis vinifera] (GB:CAO14912.1); contains InterPro domain Protein of unknown function DUF1637 (InterPro:IPR012864)	78.06	237	48	3	54	752	1	227	3e-99	357
MMN1.Contig_1088	GAGAAATTAGGGTTTTTGCATCGCCGCTAAGTTCTCTCTCCGCCGCCTCTCCCTGAGCCGCCGTCTTTAGAATGGATTCTCAGATTAAGCACGCCGTGGTGGTGAAAGTGATGGGTCGTACTGGATCCAGGGGTCAGGTGACCCAGGTACGAGTGAAGTTTACAGACTCTGATCGTTACATTATGAGGAACGTTAAGGGACCAGTGAGAGAAGGCGATATCCTCACCTTGCTCGAGTCTGAGAGAGAAGCTAGGAGACTTCGTTGATTCGTCTTGTTCTTGTTCCTTCTCCAGTAGAAACAAGAAGACAGAACCATGTCTGCTTTATCTCTCTTTTTTTCTGTTTTCTGTGTCTGGATTAGTGATTATGCCTTCGAATTGAATTTTGTTTTACTATAAG…	434	1	AT5G03850.1	40S ribosomal protein S28 (RPS28B)		Identical to 40S ribosomal protein S28-1 (RPS28B) [Arabidopsis Thaliana] (GB:Q9SR73); similar to 40S ribosomal protein S28 (RPS28A) [Arabidopsis thaliana] (TAIR:AT3G10090.1); similar to unknown [Populus trichocarpa] (GB:ABK92734.1); contains InterPro doma	100	50	0	0	72	221	1	50	2e-22	101
MMN1.Contig_1089	GGAATCAATCAGAAAAAAAAAATAATCGATATCGATCTGAGAGAAAGTGTGCGAAGAAGAATGGGAGATTCGCGATCGTTGCTGGATGGATTCAAGGGGTTCTGGGAGGAGAGGTTATCGTTCCTGGAGAATTACACGAGGTTCACCAAACGCGATACGCCTCTTCCTTCTTGGTCTTCCTCCGACGTCGACGAGTTCATAGCCTCGGATCCCGTCAATGGACCCACCCTGAAAACTGCTAGGGAAGCTGCGGCTTTTGGTGCTACTGGAGCTGCACTTGGAGCTGTATCTACTGCTGCTTTTTCCTGGAAATATTCCAGGAGTCCACATGGTACTGCACTATCATTCTTAGGAGGAGGTCTTTTTGGTTGGACCTTTGGGCAAGAAGTCGCTAACCAC…	717	1	AT1G08480.1			similar to unknown [Populus trichocarpa] (GB:ABK92625.1)	83.8	142	19	1	61	474	1	142	1e-45	179
MMN1.Contig_109	GACGGGCCTCAATTTAAGGAGAGAAGTTCAACTAAAATTGGTAAAGAAATCGAAATCTTCTTAGRGTGTTGTAGAGAAAAAAGAGAAGAAAAGAAAAAAAATGAGTCTGAAGAAATTGGACGCAGATCCCTCAACCTTGGAGAAGGTGTTGGAAGAATTGAAATCTGACGAATCAAACCGTAACAAAATCAATTTCATCCTCTTCCTCGCCAACAATGATCCCACCACCAACCGCAGCTGGTGTCCTGATTGCGTTAGAGCTGAGCCTGTGATTTACAAGACTCTAGAGGAATCAGCGGAGGAAGTGAATGTTATCCGGGCTTACGCCGGAGATAGGCCGACGTGGAGGAATCCGATGCATCCGTGGAGAGTCGATCCTCGATTCAAGGTCACTGGAGT…	717	2	AT5G42850.2	electron carrier/ protein disulfide oxidoreductase		similar to unnamed protein product [Vitis vinifera] (GB:CAO15096.1); contains InterPro domain Thioredoxin-like fold (InterPro:IPR012336); contains InterPro domain Thioredoxin fold (InterPro:IPR012335); contains InterPro domain Thioredoxin-related; (InterP	83.59	128	21	0	119	502	7	134	4e-61	231
MMN1.Contig_1090	GACACGAAATCTTTATGGCGATGGAGGCTTACCGCAGAAAAACTTGCCGTCGCCGGCTCAACCTCCGTCTGAGAGCCAGAGAACCGCGGCGGAAGAACCAAGGACCTCAGCGACAACAATTGGAGCCTAGAGCACCAATAAGTCTGAGAAAAACTTATTCTTGCAGGCGCTCTTTTGATATTTGTAAAGAGAACATTTTTGCAAGCAATTTATCATTGAGCATAATGATAGTTATTGCCACTCGATTTCCCATTCAGGTAACAATACTCTTTTAAAATAATTGTCACATAATGATTGTTTGCAGGAATAGCCATTACAAAAGAAGCTTTGGGATTTTGGACGGTGAAGTTGCTTCGAAAGATGGGGTGTGGATGCTATTGTTTCCCAATTAGTGAAATG…	691	1	AT1G28760.1			similar to unknown protein [Arabidopsis thaliana] (TAIR:AT5G67610.1); similar to unknown protein [Arabidopsis thaliana] (TAIR:AT5G67610.2); similar to unnamed protein product [Vitis vinifera] (GB:CAO18262.1)	50	18	9	0	295	348	249	266	3e-12	25.4
MMN1.Contig_1091	GGGGGATCAATTAACAAAAATTAAAATAACACCCTTCTTTGGTGTTGTGAAGCACAGGATGTGACTTCAATTAAAAACCATAGAATCCGTAGAAAGAGTGACAGAATGGCAAGACTTTTATAATATCTTTAATTTCATACAAGACTCATGTTTTGGAGATTCTTCTAATGGCCCATCCGACACTGGGTACCTATGCAAATAACTAGGCACCTCTGATGACTTCTTCTACTCCGGCTTTGATGACTCTCTTAAACAGATACCTACCCTAATAGAGTAGTCGATAATAGAGAAAACCATATGATTTTTTGTAGGACTTAACACGATGGAAATCTCCATGTACAACGTAGCAGTCGCCCAAGGAGTAGTTAACTGGCCTCACTCCCACCCTGTTGTGACGCG…	738	1	AT1G74820.1	cupin family protein		Identical to Germin-like protein subfamily T member 3 precursor [Arabidopsis Thaliana] (GB:Q9S772;GB:Q1PFD3); similar to germin-like protein, putative [Arabidopsis thaliana] (TAIR:AT1G18980.1); similar to germin-like protein [Ananas comosus] (GB:AAM28275.	57.14	56	24	0	433	600	137	192	2e-09	59.3
MMN1.Contig_1092	GCTAACTCCCAAAAATAAGAAACTTTTCTCTCTCTTCTCCATCTCTTTCCAAACTCTCTCTCTATGTCCGAACAAACGCATCGTGTCTGAGAAACAATTGCTATCAAACTCGATCTTTCTCCACTAGAAACTGATCTATACACATTAAACAAAAAGAAGTCTTTAATATTATCTGTACAGAGAGCTATGGCAGCCGTTTCCTCTAACCCTCGCACCGTCGAAGAGATCTTCAAAGATTACACCTCTCGTCGCTCCGCTCTTCTCCGTGCTCTTACCAAAGATGTTGACGATTTCTACTCTCAATGCGATCCGGAAAAGGAGAATCTTTGTTTGTACGGACACCCGAACGAGTCGTGGGAAGTGAATCTACCGGCGGAGGAAGTTCCACCGGAGCTACCT…	753	1	AT3G11200.1	PHD finger family protein		similar to PHD finger family protein [Arabidopsis thaliana] (TAIR:AT5G05610.2); similar to PHD finger family protein [Arabidopsis thaliana] (TAIR:AT5G05610.1); similar to unknown [Populus trichocarpa] (GB:ABK92965.1); contains InterPro domain Zinc finger,	93.82	178	11	0	184	717	2	179	5e-82	300
MMN1.Contig_1093	GGCAGATCTGAGAGATCTAGAGGAAGAAGACGAGACGAAGAAGCAGAGCAGCAAATGGCATCCATGGCGGCAGGACCAGATCACCTCTTTAACCTGAGAAACAGTTTTTACCTAGGTGCATATCAAGCGGCGATCAACAACAGCGAGATCCCTAATCTTTCGCAAGAAGATATCGTCGAGCGTGATTGCCTTGTCCATCGCTCTTACATCGCTCTCGGTAGCTACCTGCTGGTCATCAATGAGATCGACGAAGCGTCGGCTACTCCTCTTCAGGCAGTGAAGCTCCTTGCTATGTACCTTTCGACCCCTGAAAACAAGGAATCAACCATTGCTAGCTTGAGGGAATGGCTGGCAGATCCAACTGCTGGGAGCAATGCTACCGTTAGGTTGATTGCTGGT…	759	1	AT1G30630.1	coatomer protein epsilon subunit family protein / COPE family protein		Identical to Coatomer subunit epsilon-1 [Arabidopsis Thaliana] (GB:Q9SA78;GB:Q8LB21); similar to coatomer protein epsilon subunit family protein / COPE family protein [Arabidopsis thaliana] (TAIR:AT2G34840.1); similar to epsilon1-COP [Glycine max] (GB:BA	88.5	226	26	0	73	750	6	231	7e-113	403
MMN1.Contig_1094	GAGAGTGACCTACTCAAAGCCCCTGAGCCGATCATTGAAGAACCAATGCTAGCCGTTGACCCTCTCTCTCAAGAGATTGTTGAACTCAGCGATCTCGGGTCGTTGCAGAGTGACCAACAGCTTATAGAAAAGGCTTTCTACGAGTGTGAGCAGGAGCTCTTGGTGAAATCAGCCATGGAGTCTCCGCTGCTCTCCGAGGTACTACTAGACAGGAAGAACGTCTCTCAAGTGGCGGAAATGGACAGTAGTAGTGTAGTTGTCTCTGATGTCCCAGTTCCTAAGAGCGTGAGCTCGGGGAGCCTGACATCGATGGATATGGCACAGCACGAGGAGGCGGTGATTCAGAGGTTCTTCCCTCCAGTGGATAATGGAATGAGAAGAGCCTTTAGCGAGAGCGAC…	743	1	AT4G27900.2			similar to unknown protein [Arabidopsis thaliana] (TAIR:AT5G53420.1); similar to unnamed protein product [Vitis vinifera] (GB:CAO48522.1); contains InterPro domain CCT (InterPro:IPR010402)	76.64	214	44	4	1	624	50	261	3e-79	291
MMN1.Contig_1095	CAAGAACAATGTCACAAGCATTATTGCTGGGTGTACTAGCCGTTCGTTTGAGCAGGTTCTGAAGGATATTGACAGGGACCGGTACATGTCTCCGATTGAAGCGGTGGAGTATGGTTTGATCGATGGGGTTATTGATGGGGACAGCATCATTCCTCTGGAGCCTGTTCCTGATAGGGTGAAACCGAGGGTGAACTATGAGGAGATTAGCAAAGATCCGATGAAGTTCTTGACTCCTGAGATACCTGATGATGAGATTTACTGAAAAGCCAAGCCTCGTCCAGAACCAGGGATCTTCGAGTCGTAAGTTTAGAGGAAAAAGCTCGGTAACTTCTGCGGCCAGGTTTACGAAATGGAAGTTGCCTCTGTATCTCATATTTTTGCTTATTCAGAAAGATAATT…	467	1	AT5G45390.1	CLPP4 (Clp protease proteolytic subunit 4); endopeptidase Clp	One of several nuclear-encoded ClpPs (caseinolytic protease). Contains a highly conserved catalytic triad of Ser-type proteases (Ser-His-Asp). The name reflects nomenclature described in Adam et. al (2001).	Identical to ATP-dependent Clp protease proteolytic subunit 4, chloroplast precursor (CLPP4) [Arabidopsis Thaliana] (GB:Q94B60;GB:Q8LAN0;GB:Q9FHJ7;GB:Q9SXJ5;GB:Q9ZS78); similar to CLPP3 (Clp protease proteolytic subunit 3), endopeptidase Clp [Arabidopsis	100	86	0	0	2	259	207	292	4e-45	176
MMN1.Contig_1096	GATTATCATCCACTTGCTGAAGATTCCCCACTAGAAAGAAAGAAGCATACGATTCTCTCCTTACCATCCTGCTTCGATTCCCACCAAACATGGAAGCCCTGATTCACCACTTCACTCTCCTCTCCGACCAAGCCCTTGTCGACAAAACATTCGACCCTGCCACGATCGAAGACCTCATGCGTCTCTTCGAAGTCGATTCCTACAAGGCTTGGGCAGCTCTCGAAGCCGAGCAACAACAAGAGCTCGAAGCCGCTGAAGAATCTATCCGCGAAGCCGAAGCTGAACTCGATCGGGATATGGAGTGGGGGATGGAGGAGTACAGGCGGACGTTGGAGGAGATGGAGAGGATGGAGGCGGCGGAGCTTAAAGAGCTTGAGGAGAAGGCGGAGACTGCTCGGA…	718	1	AT1G60870.1	MEE9 (maternal effect embryo arrest 9)		similar to hypothetical protein MtrDRAFT_AC155889g19v2 [Medicago truncatula] (GB:ABN08291.1)	93.88	147	9	0	90	530	1	147	5e-23	104
MMN1.Contig_1097	GATCACAAAACAATCTTCCTCACTATCATCTCTTCAAATCCGTTAAAAACTATCTTTCTCTACTACTCCATTGTAATGGCTTTGTCACTTCTGACATACTCCATTAAAATCCCCACCACCGCTTCCACGGTAGTTGTCCGGCCAGTGTTACCTATTCGATCTTCCCTTCCCTCTCTCCGCCTAACTTTTCCGCATAGAACACCAACCTCGTTCATCTCATGTTGCTCCTCTGTGTCTGAAAAGGCGGCAACTAGTGGTATTGACCTCAAACCCGACGTGGAACGGTGGCCAAAGTACATACCCAACAAGCTCCCCGACAAAAATTATGTGAGAGTACTCGACACGACGCTGCGTGATGGCGAACAATCTCCAGGTGGAGCCCTTACTCCAGCGCAGAAG…	701	1	AT5G23010.1	MAM1 (2-isopropylmalate synthase 3); 2-isopropylmalate synthase	Encodes a methylthioalkylmalate synthase, catalyzes the condensation reactions of the first two rounds of methionine chain elongation in the biosynthesis of methionine-derived glucosinolates.	Identical to Methylthioalkylmalate synthase 1, chloroplast precursor (MAM1) [Arabidopsis Thaliana] (GB:Q9FG67;GB:Q70YX4;GB:Q70YX9); similar to IMS2/MAM-L/MAM3 (METHYLTHIOALKYMALATE SYNTHASE-LIKE), 2-isopropylmalate synthase/ methylthioalkylmalate synthas	77.27	154	35	0	76	537	1	154	1e-54	209
MMN1.Contig_1098	GGTTTTCAATTCAATTATCCCACCTAACCAATCCCATCGCTTTCTTTTCAGTTTCAATCTTTCATTCTTTGTGGTTCATCTCTCTCAGAATCCACAAAGAAAAATAAAAAAAAATTTCATTTCTGTGAGATTCTCAGAAACCAAATTCTTCTTCACCAACTCCTCCAAGAATCATGCATGAGAAGAATATTGTAGAGGACGTTATCAACGACTTCGTTGATAACTTCACTGAGACAGTTCAAAAGAAAAAAAACGTTTCTTTCTTCCAACAAGAAGAAACCGTCTCTTCTCGTTTCAACCGCATGTTCGGTCGGGAGAAGCCGATCCATCATGTCTTAGGCGGTGGCAAATCTGCTGATGTGTTGTTGTGGAGGAACAAGAAGATCTCCGCAAGTGTTC…	691	1	AT3G10260.3	reticulon family protein		similar to reticulon family protein (RTNLB6) [Arabidopsis thaliana] (TAIR:AT3G61560.1); similar to unnamed protein product [Vitis vinifera] (GB:CAO69968.1); contains InterPro domain Reticulon; (InterPro:IPR003388)	86.29	175	23	1	168	689	19	193	1e-82	302
MMN1.Contig_1099	GGAGATCGGAATTTTCGAGAAAGCGCGAGAGGGAGAGAGAGAGAGACGAAACGATGTCGTATCTTCTACCGCATCTTCACTCCGGCTGGGCTGTCGATCAGGCGATTCTAGCCGAGGAAGAGCGTCTCGTCGTCATACGTTTCGGCCATGATTGGGATGAGACTTGTATGCAGATGGATGAGGTGCTTGCGTCTGTTGCTGAGACGATAAAGAACTTTGCGGTGATATATCTGGTGGACATCACCGAGGTTCCAGACTTCAACACCATGTACGAGCTCTACGATCCTTCCACGGTGATGTTCTTCTTTAGGAACAATCACATTATGATCGATCTTGGGACTGGAAACAACAACAAGATCAATTGGGCTATGAAGGACAAGCAGGAGTTTATCGATATCA…	744	1	AT5G08290.1	YLS8 (yellow-leaf-specific gene 8); catalytic	Encodes Dim1 homolog.	similar to catalytic [Arabidopsis thaliana] (TAIR:AT3G24730.1); similar to unknown [Populus trichocarpa] (GB:ABK94150.1); contains InterPro domain Thioredoxin-like fold (InterPro:IPR012336); contains InterPro domain Thioredoxin fold (InterPro:IPR012335);	95.07	142	7	0	54	479	1	142	9e-76	280
MMN1.Contig_11	GGTTCTACCCGTAAYCCAATCTTCTCTCACACAAAAAAAAAATATCATTCCGTTAAAGAAAAMAAAAACTTCAATTTCTTCTTTTCGTTCTTTCCTTCTTCTGGTAGAGTTCAGAGATCCACAAGTTATCTTGGTTAAATTCGACG	146	2	no significant hit
MMN1.Contig_110	GGATATTTCTGCTTTTATTTTCCATCTCTGATTTATTATCTCTATCTATCTCTATTGCGCAGAAACTKGTATCAGGCGAATCCCAGTTTCATTCTTCTTCCAAGGATCTATCACTTTATTATCAACTTTAACAAAATGGCACGTCCACAAGACCCTCCACGCGGTTTCTTCCCTTTTGGAAACCCTTTCAAGAACCTATCTTCCAAGAACCCAGTACTCTCCTCTAACCTTCTCTCCCTCTTGAACACTTTCGAGACCAACTTARCTTCTTCCATTACAAAGCTTGTCCCTAAKGAAAAGTCCCAAATCCTCACCCTTTCATGGATGAGTCAAGCGATGGCGTCTCTTTGCCAGACCCACWACGCTATCAAGACTCTTATAACCGRTCTASAGCTTCCT…	756	2	AT1G01550.2	BPS1 (BYPASS 1)	BYPASS1, required to prevent constitutive production of a root-derived graft-transmissible signal	similar to unknown protein [Arabidopsis thaliana] (TAIR:AT2G46080.1); similar to unknown [Populus trichocarpa] (GB:ABK94247.1)	77.56	156	35	0	274	741	47	202	7e-65	243
MMN1.Contig_1100	GACTCTGACATCAAAACAATCAAACAACTAGCTACTTCAACCAAATACTTTCAAAGAAGAGAGAGAGATGGAGAAGAACATTAAGTTTCCAGTTGTAGACTTGTCCAAGCTCATTGGTGAAGAGAGAGACCAAACCATGGCTTTGATCAACGATGCTTGTGAGAATTGGGGCTTCTTTGAGATAGTGAACCATGGTTTACCACATGATTTGATGGACAACGTCGAGAAGATGACAAAGGAACATTACAAGATATCAATGGAACAAAAGTTCAACGACATGCTCAAATCCAAAGGTTTGGAAAATCTTGAGCGAGAAGTTGAGGATGTTGATTGGGAAAGCACTTTCTACCTTCGTCATCTCCCTCAGTCCAATCTCTACGACATTCCTGATATGTCTGA…	750	1	AT1G62380.1	ACO2 (ACC OXIDASE 2)	Encodes a protein similar to 1-aminocyclopropane-1-carboxylic oxidase (ACC oxidase). Expression of the AtACO2 transcripts is affected by ethylene.	similar to 1-aminocyclopropane-1-carboxylate oxidase, putative / ACC oxidase, putative [Arabidopsis thaliana] (TAIR:AT1G12010.1); similar to ACC oxidase [Brassica oleracea] (GB:CAA57284.1); contains InterPro domain 2OG-Fe(II) oxygenase (InterPro:IPR005123	92.51	227	17	0	68	748	1	227	9e-110	392
MMN1.Contig_1101	GACTCGTGTTCACCTCGTGCCCATCCAGATTCTTATCTTCCTCTCGAAAAAGGTTTTAGCGAAGATGACGAAGAACTACCCAGCTGTTAGCGAAGAGTACCAGAAGGCTATTGAGAAGTGCAAGAGGAAGCTGAGAGGCTTGATCGCTGAGAAGAACTGTGCACCAATCATGGTTCGCCTCGCATGGCACTCAGCTGGAACATTCGATTGCGCCTCGAGGACTGGTGGTCCCTTCGGAACAATGAGGTTTGACGATGAGCTAGCTCATGGAGCCAACAATGGTCTCCACATTGCTCTTAGGTTGTTGGAGCCTATCAGGGAGCAGTTCCCTACCATCTCTCATGCTGATTTCCATCAGCTTGCTGGTGTTGTGGCTGTTGAAGTCACCGGTGGACCTGA…	749	1	AT1G07890.8	APX1 (ASCORBATE PEROXIDASE 1)	Encodes a cytosolic ascorbate peroxidase APX1. Ascorbate peroxidases are enzymes that scavenge hydrogen peroxide in plant cells. Eight types of APX have been described for Arabidopsis: three cytosolic (APX1, APX2, APX6), two chloroplastic types (stromal	Identical to L-ascorbate peroxidase 1, cytosolic (APX1) [Arabidopsis Thaliana] (GB:Q05431;GB:Q0WLU2); similar to APX2 (ASCORBATE PEROXIDASE 2), L-ascorbate peroxidase [Arabidopsis thaliana] (TAIR:AT3G09640.1); similar to APX2 (ASCORBATE PEROXIDASE 2), L-	90.54	222	21	0	65	730	1	222	1e-109	392
MMN1.Contig_1102	GGTCGTTTCCGATCCTCCTTCTGATATCATCGCCGCTAAGGAAAAAGTAGTGGACTGTGATCACCGGATCCAATCTAAGTAGAAAATGGGAGGAGCTGGAGGAGAAGGAGGCGGCGATTTCAGAGCCAAAGTATGGAGCGTGTCTGGTGGGCCTTACTGCAGGCCCAAGCACTGGCGTCGCAACACCGCCTTTGCGATGCTCGGCGTTTTCCTTGTCTGCATCCCCATTGCCATGAAGTCTGCCGAGCTCGAGCAAAGGCCGCACATGCCCGTACGTCCAATTCCTTCTCAGATTTGGTGCAAGAACTTTGGAACCAAGGACGATTACGAGAAAGAGCATTAAACACTCTTGTTTTGCTTCCTGTTGAGACAACTCTCTTTGCCTTTGTTTCTTGTTTT…	484	1	AT4G00585.1			similar to hypothetical protein MtrDRAFT_AC148817g12v2 [Medicago truncatula] (GB:ABD28446.1)	89.33	75	8	0	116	340	14	88	2e-37	151
MMN1.Contig_1103	GACGCCGCGTCTTTGTGTGTTTATCATCAACACAACAGATCTGATCGCCTTTTAAGTCGTCTCTTCTCCCCCAAACCAAAACAATGGCTGAGGCAACACCAGCTTTGAGGAAGCCTGTGTTCACAAAGGTTAATGAGCTGAGACCTGGAACCAATGGTCATTCATTGAATGTGAAAGTTGTCAGCTCGAAGATGGTGATGCAGAGAGGTGGTGGTGGAGGAGGTCGTCCCAGTGGTCCTCAGGCTCGTCAGATGAGGATTGCTGAGTGTCTTGTTGGTGATGAGACTGGAATCATTATCTTTACTGCACGAAATGATCAAGTGGATTTGATGAAAGAAGGCAAGATTGTGACCCTGCGCAACGCCAAGATCGACATGTACAAGGGATCTATGAGGCTTG…	747	1	AT1G10590.2	DNA-binding protein-related		similar to DNA-binding protein-related [Arabidopsis thaliana] (TAIR:AT1G23750.1); similar to unnamed protein product [Vitis vinifera] (GB:CAO66056.1); contains InterPro domain Nucleic acid binding, OB-fold, tRNA/helicase-type; (InterPro:IPR004365); contai	90.78	141	13	1	84	506	1	138	2e-65	245
MMN1.Contig_1104	GGACGAACCCCATCGGAACAGTCAATCTTGGAGTTCCTCCTTGGCTACATAGCATGAACCGATAGAGCTCCGCCGTTGAGCCTCCTGTAAATCACGATCTCCACCGTAAATATTTTCTTTTTTCAAGCTTCTCCTCCGATGTGTGGCATGAACCACTAGAGACAAGTTCTAGTCGTCCCCGTCAGTGCTAGGTCGTCACTCTCCTCACCCTCGTGGTTCATCTTCCTCTGCGTTTTCAAGTTGGTGACTCATAAACCTCTGTCGTGCCTTCTTTCACGAGCGTCTGAAACCCCTCATCGTCACCGGGTCATTCCGAAGCGATCCACCACCTAATAATGATTCACCACCGCTGGTCTCTTATTCAACCAGGCTCAATCGGCTCCGTGACCTACTGCTCCT…	531	1	AT1G34360.1	translation initiation factor 3 (IF-3) family protein		similar to leucine-rich repeat family protein / extensin family protein [Arabidopsis thaliana] (TAIR:AT3G19020.1); similar to unnamed protein product [Vitis vinifera] (GB:CAO47407.1); contains InterPro domain Initiation factor 3; (InterPro:IPR001288)	36	50	31	1	364	510	370	419	1.1	29.6
MMN1.Contig_1105	GATTCTCTTCTTGCAGAGATTAAAGAGCTGAGAGCAAAACTTGATGTGGAAGGGACCGGCGGAAACAATGGTAACGCGGTGACAGAAGAAACCGGCGTTGTAAAACCGGTGGAAACGGTCGCGTTTCAGACGGTGATTGCTAATATCGAAGTCTTAGAGCTAAGCCAGTGTCCTCCACTGGCCTGGGGAAGCTCCGGCATCGGAGCTCGCATACGAGATGTTTAGCATTTTCCCACGTACCGAAAGCTTCAGAGAAGATCCAGCCGACAGTAGCGACTCAAGCGCTGTTTTGAACGAAGAATATAGTCCCACGGCGGCGGCGGCGACAGCGGTTGAGATGTCGACGATGGGATGTTTTGGGCAGTTTGTGAAAATGGAAGAGCATGAAGATCTTTTTAG…	709	1	AT5G65310.1	ATHB5 (ARABIDOPSIS THALIANA HOMEOBOX PROTEIN 5); transcription factor	encodes a class I HDZip (homeodomain-leucine zipper) protein	Identical to Homeobox-leucine zipper protein ATHB-5 (ATHB-5) [Arabidopsis Thaliana] (GB:P46667); similar to ATHB6 (ARABIDOPSIS THALIANA HOMEOBOX PROTEIN 6), transcription factor [Arabidopsis thaliana] (TAIR:AT2G22430.1); similar to unknown [Populus trich	55.93	59	26	2	1	177	155	205	5e-52	50.8
MMN1.Contig_1106	GACAATCAAGCCCATCAAATCGCCAACAGAAAAAAAAAGAAAGCAAGGAAGAAATAAATAAATAAACAAAAGAAAGCATCTGATAATGAAGGATCTTCATTTCCACATCTTCCTAGTCACCATGACGGTCATTGCATTCATCTCCGCGGCAACACCGACGGCTCCTGCGGCCGGAGGAGCATTGTCGGACGAATGTAACCAAGATTTTCAAAAGGTGACCTTGTGTTTGGACTTCGCGACCGGGAAGGCACCAACTCCGTCTAAGAAGTGTTGTGACGCTATTGAAGATATAAAAGAGAAAGATCCAAAGTGTTTGTGTTACGTGATACAACAAGCCAAGACAGGAGGACAAGCTTTGAAGGATCTTGGTGTTCAAGAAGCCAAACTTATTCAACTTCC…	697	1	AT1G27950.1	lipid transfer protein-related		Identical to Uncharacterized GPI-anchored protein At1g27950 precursor [Arabidopsis Thaliana] (GB:Q9C7F7;GB:Q570M7;GB:Q8LEI0); similar to protease inhibitor/seed storage/lipid transfer protein (LTP) family protein (YLS3) [Arabidopsis thaliana] (TAIR:AT2G44	80.21	187	37	2	86	646	1	184	3e-78	288
MMN1.Contig_1107	GGGGGACACCCTCTGTTCTGTTTTTTCCCGAGAAAGTTTATAGTTTTCCGTGAAAATTCATTTTTATCATCAATCAAACAAACAAAAAACTCTGTTTTGACAAACTGGGTCTTCTCTTTTCTTGTCAAGTCTGCAAATTTTCTCGTCTCTTTCGGGTATATCTCGTTTCGAGTTTTCGATCACAGAAACATACAAAACAACCGTAAAATAAGCTTTCTCCTC	222	1	AT5G38330.1	LCR80 (Low-molecular-weight cysteine-rich 80)	Encodes a member of a family of small,secreted, cysteine rich protein with sequence similarity to the PCP (pollen coat protein) gene family.	Identical to Low-molecular-weight cysteine-rich protein LCR80 precursor (LCR80) [Arabidopsis Thaliana] (GB:P82789;GB:Q1PDQ7); similar to LCR58 (Low-molecular-weight cysteine-rich 58) [Arabidopsis thaliana] (TAIR:AT5G38317.1); similar to hypothetical prote	46.43	28	14	1	57	137	17	44	0.75	28.9
MMN1.Contig_1108	GAGTGGCTTGAAGCTGGTGACAAACCTATATATATCGGCTTGGGTAGTCTTGTGAGTTAATCTATGACTGTGTAATTTAACTATCTTATGAGAAATTGAAAATAATGTCTCTACCGTTTATTCGTGGTGAAAGCCTGTACAAGAACCAGAGAAAATGACTGAGATCATTGTGGAAGCACTTGAAAGAACTAAACAGAGAGGAATCATCAACAAAGGATGGGGTGGCCTTGGAAACTTGAAAGAACCCAAGGACTTCGTCTACTTGTTGGATAATGTCCCACATGACTGGTTATTCCCAAGATGCAAGGCAGTGGTTCATCATGGGGGTGCTGGAACAACGGCTGCAGGTCTTAAAGCAGCGTGCCCAACAACTATTGTGCCTTTCTTTGGAGACCAACC…	725	1	AT3G07020.2	UDP-glucose:sterol glucosyltransferase (UGT80A2)		similar to UDP-glucose:sterol glucosyltransferase, putative [Arabidopsis thaliana] (TAIR:AT1G43620.2); similar to UDP-glucose:sterol glucosyltransferase, putative [Arabidopsis thaliana] (TAIR:AT1G43620.1); similar to UDP-glucose:sterol glucosyltransferase	94.12	17	1	0	1	51	439	455	3e-84	38.5
MMN1.Contig_1109	CGATCAGTTCACCATACTCAGCATCTCCAAGTACGGGAAGAAGATACAGAAGAGCAGGAGATCAACACCAAAACGGATATGGATTCTGACATGATCCAGAATCAATATATCTGACTTGTGATAAATGATAAAACGCATTTTCACTCGGTTAGTGACTCTCATCAGGTATTTAGTATAATTAAATTATGTGTTGGCAAAATGAAGAAAGTTATATAAGAGAATGGAACAAGGGGTGTTGGAGTCTGCATTGGGTTTGACTGGTGAGAGAGTTGTAAGGGAATGAAGAAGGTGATATAGTAGTTTTTATTGGGTTCAGATGTTCCCTGTAATGTAAGCAATAACAGGAAGCAAACTCTTTCACTTCTATATATCTTGAATTGGTTCAATAATAATGTACCC…	415	1	AT4G33650.1	ADL2 (ARABIDOPSIS DYNAMIN-LIKE 2); GTP binding / GTPase	Encodes a protein with high sequence similarity to the dynamin superfamily. Among those members ADL2 was most closely related to Dnm1p of yeast and likely a member of the Vps1p subfamily. Widely expressed in various tissues with highest expression in flo	Identical to Dynamin-related protein 3A (DRP3A) [Arabidopsis Thaliana] (GB:Q8S944;GB:O22403;GB:O81882;GB:Q94CF3); similar to dynamin-like protein 2b (ADL2b) [Arabidopsis thaliana] (TAIR:AT2G14120.1); similar to dynamin-like protein 2b (ADL2b) [Arabidopsi	88.89	27	3	0	6	86	782	808	1e-07	52
MMN1.Contig_111	ATGAAGAAAATGTATGACCTCATTGAGGAATACAAGCTCAACGGCCAGTTCAGGTGGATCTCCTCCCAGATGAACAGGGTTAGGAACGGTGAGCTCTATAGGTACATCTGCGACACCAAGGGTGCTTTTGTGCAACCAGCACTGTATGAAGCCTTTGGGTTGACTGTTGTGGAGGCTATGACCTGTGGGTTACCAACATTCGCCACTTGCAAAGGTGGTCCAGCTGAGATCATTGTCCACGGCAAATCGGGTTTCCACATTGACCCTTACCATGGTGATCAGGCGGCTGATACTCTTGCTGATTTCTTCACCAAGTGTAAGGAAGATCCATCTCACTGGGACCAGATCTCAAAGGGAGGGCTTCAGAGGATTGAGGAGAAATACACGTGGCAGATTTAC…	790	3	AT5G20830.2	SUS1 (SUCROSE SYNTHASE 1); UDP-glycosyltransferase/ sucrose synthase	Encodes a protein with sucrose synthase activity (SUS1).	Identical to Sucrose synthase 1 (SUS1) [Arabidopsis Thaliana] (GB:P49040); similar to SUS2 (SUCROSE SYNTHASE 2), UDP-glycosyltransferase/ sucrose synthase/ transferase, transferring glycosyl groups [Arabidopsis thaliana] (TAIR:AT5G49190.1); similar to SU	97.8	182	4	0	1	546	626	807	3e-105	378
MMN1.Contig_1110	GGAAAATATTTCATCGCCTCTCGAAAAACCTACCTAGCGCACCAGTCCCCATGGACGTATCCGCGAACAAAGGTCTGGAATTGAACGGTCGTGATGCAGAGATCCTAATTAGCTCCAGCACGTTGAGAATCCACGCGAAACCTAGGGAAGTCGCCTTGGACGAAGGTCTGGAATTGAACGGTGGGATTCGAAATAGCAGTATTATTAGCAGGATGGTGGTTGAGGGATACGACACCTCCCCTACTAGGGAGGATGTCGAAGAGGCTCTGAAAAAACACTTCGCATCACGTGGAATAAATTTAATGCATGTCTCTGTTCCCGTAGACTACAAATGTCGTAATCGCAGACGCGCCTTAATCTATGTTAATGGAGAATGTGAAGCAGAGGCGTTGAAGCTTG…	434	1	AT5G03480.1	nucleic acid binding / nucleotide binding		similar to nucleotide binding [Arabidopsis thaliana] (TAIR:AT5G03495.1); similar to H0714H04.9 [Oryza sativa (indica cultivar-group)] (GB:CAH66982.1); contains InterPro domain RNA recognition motif, RNP-1; (InterPro:IPR000504); contains InterPro domain Nu	38.64	88	52	4	162	419	10	95	3e-06	47.8
MMN1.Contig_1111	GTTCAGACAGCGTTTCATTATCACTTCCGACAAAACTCTTTATACCTTTCCGCACTTCCTTTCCACCGACTTCCTCCATGGCTCCGATTGCTGTTGGCGATGTTGTACCTGACGGATCTATCTCCTTCTTCGACGTAGTACGATCAGCTCCAGACTGTCTCCGGTCACTCCCTCGCCGCCGGTAAGAAGGTCATCCTCTTCGGTGTCCCTGGTGCTTTCACCCCCACCTGCAGTATGCAGCATGTGCCTGGATTCATCGAGAAAGCAGAGGAGCTGAAGTCAAAGGGTGTTGACGAGATCATTTGCTTTAGTGTGAATGATCCGTTTGTGATGAAGGCATGGGGGAAGACGTACCCAGAGAACAAGCATGTGAAGTTTGTGGCAGACGGTTCAGGAGAA…	743	1	AT1G65980.1	TPX1 (THIOREDOXIN-DEPENDENT PEROXIDASE 1); antioxidant	thioredoxin-dependent peroxidase	Identical to Peroxiredoxin-2B (PRXIIB) [Arabidopsis Thaliana] (GB:Q9XEX2); similar to TPX2 (THIOREDOXIN-DEPENDENT PEROXIDASE 2), antioxidant [Arabidopsis thaliana] (TAIR:AT1G65970.1); similar to type 2 peroxiredoxin [Brassica rapa subsp. pekinensis] (GB:	88.65	141	16	0	142	564	22	162	2e-62	216
MMN1.Contig_1112	ATCACAATTCCTTTTTTAAAAATCTCCTCCTAGCTTCTTCCTCTTCCTCCTCCTAAAAGAGACCGAACACATCCAAGATGGTCTTGTGGGTGTTCGGATATGGATCTTTGATATGGAACCCAGGTTTCGATTTTGATGAGAAACTCATTGGCTATATCAAAGACTACAAACGTGTATTCGATCTCGGGTGCATTGATCATAGAGGCACGCCTGAACATCCTGCAAGAACTTGCACGTTGGAGGAATCCACCGGAGCAATATGCTGGGGTGCAGCTTATTGTGTTCGTGGAGGACCCGAGAAGGAGAAGCTAGCGATGGAGTACTTGGAAGGAAGAGAGTGTGAATACGACTCAAAAACACTCGTTGAGTTTTACACGGAAACTGACACCACCAAACAGT…	727	1	AT5G26220.1	ChaC-like family protein		similar to ChaC-like family protein [Arabidopsis thaliana] (TAIR:AT4G31290.1); similar to ChaC-like family protein-like [Solanum tuberosum] (GB:ABB87104.1); similar to meloidogyne-induced giant cell protein-like protein [Solanum tuberosum] (GB:ABA46779.1)	89.81	216	22	2	78	725	1	211	5e-111	397
MMN1.Contig_1113	GGTCGCTCAAAATCACAGAAGCAGCTAAAACCATTTGATCGATTCGGAGAAGAGAAAGGAAGGATGGGTGGAGGAATGGAGACGAACAAGAACAAGTTCATCGAGGACTGGGGATCCGCGAGGGAGAATCTCGAGCACAACTTCCGATGGACACGTCGCAACTTCGCTCTCATCGGAATCTTCGGCATCGCTCTCCCCATCATCGTCTACAAGGGCATCGTCAAAGATTTCCATATGCAAGACGAAGATGCAGGCAGACCACATAGAAAGTTCCTCTGAGATTGTTTGCCACTCTCTTCTGCAAAAGGTCTCAGCATTGTGAAAGTTTCAAGAAGCTGATGCTTGCACCGTCCTTTTTTGCATTTTATTCAGAATAAAAGAACATCTCCAAGGACTATA…	528	1	AT2G31490.1			similar to unknown [Populus trichocarpa] (GB:ABK96039.1)	100	65	0	0	82	276	7	71	3e-34	140
MMN1.Contig_1114	GAATCGAAAAAACAAAACAGCGGAAGAGGAGAGTAAAAGAAATGGTGAAGGTGTTGACATACTTTGGGATGACATTGGCAGCTTTCGCCTTCTGGCAATCTATGGACAAAGTTCATGTCTGGATCGCTCTTCATCAAGACGAGAAGCAAGAGAGAATGGAGAAGGAAGCGGAGGTTAAGCGGGTTAGAGCAGAGCTGCTGCGGAAAGCTAGAGAGGAGGATCCTCTTGCCTGATCATCCTTCTTCTTCTTCTTCAGTCATGTTTTTGGCTCTTATCAAACTTATCTCATGACATTATTTTTTCACCGTTATGGACCAAAATGGAGTTTGCATAAAACGACAGTACCATATATGCTTTTGAATGTGGGATGATCATGAATAATAACTTCCTCTTTGTTGTT	400	1	AT1G67785.1			similar to Os01g0908400 [Oryza sativa (japonica cultivar-group)] (GB:NP_001045143.1); similar to unnamed protein product [Vitis vinifera] (GB:CAO42476.1)	98.41	63	1	0	42	230	1	63	2e-30	127
MMN1.Contig_1115	GAATCAATTTACCATTTTCAAAGCCAATCCTCTCTCTCTCTTTCTTTTTTCTGCATGTCCAATCATTTTCGAGGTTTCCTGCAGTCGGTGAGAACGGTTGAGTGCGACGACGAAGAAGTTAGGGTTGGTGAAGATGATATTTCCTAAGAGCTTGATCGAGGATCTTCACAAATGGGGTTGCATGAAGCAGACGGGCGTGAGCCTCAGGTACATGATGGAGTTTGGTTCCACGCCTACTGAGAAGAACCTTTTGATCTCCGCGCAGTTTCTCCACAAGGAGCTTCCGATTCGCGTCGCGAGGAGGGCGATCGAACTCGAGACGCTGCCTTACGGTCTCTCCGAGAAACCTGCCGTCTTGAAGGTAAGGGATTGGTATCTGGAATCATTCAGGGACATGAG…	786	1	AT3G06483.1	PDK (PYRUVATE DEHYDROGENASE KINASE); ATP binding / pyruvate dehydrogenase (acetyl-transferring) kinase	Pyruvate dehydrogenase kinase (PDK) specifically phosphorylates the E1&#945; subunit of the pyruvate dehydrogenase complex (PDC) on a Ser residue using ATP as a phosphate donor. PDK is a unique type of protein kinase having a His-kinase-like sequence but	similar to mitochondrial pyruvate dehydrogenase kinase isoform 2 [Glycine max] (GB:AAT02656.1); similar to mitochondrial pyruvate dehydrogenase kinase [Brassica napus] (GB:ABA25867.1); contains InterPro domain Histidine kinase; (InterPro:IPR005467); conta	90.87	208	19	1	137	760	9	215	5e-108	387
MMN1.Contig_1116	GGAAAGAAACCATTTGTTGGTAGCTCTTGTTCTTCTTCGGCTGAGAGAGGCAATGGCGGAGGAGCAAAAAACGACTAAAGTCGACGTAGAATCTCCAGCGGTTGTAGCTCCGGTGAAGGAACCTACTCCTGTTCCGGTGGAAGCTTCTAAAGACGTGGCAGAGGAGAAGATTCATACTCCACCACCTCCTGACGAGTCCAAAGCTCTTGCCGTTGTCGAAAAACCCATTGAGGATCCCACACCAAAGAAAGGTTCGGCCGATAGAGATGTGATACTTGCAGACTTGGAAAAGGAGAAGAAGTCATCATTCATCAAAGCATGGGAAGAGAGTGAGAAGTCAAAGGCTGAGAACAAGGCCCAAAAGAAGATATCTGATGTGCTTGCTTGGGAGAACAGCAA…	793	1	AT2G45820.1	DNA-binding protein, putative		Identical to Remorin (DBP) [Arabidopsis Thaliana] (GB:O80837;GB:Q39087); similar to DNA-binding family protein / remorin family protein [Arabidopsis thaliana] (TAIR:AT3G61260.1); similar to unknown [Populus trichocarpa] (GB:ABK92585.1); contains InterPro	86.39	191	23	3	65	628	5	190	2e-54	209
MMN1.Contig_1117	GATCTTTGCCTCTCCTGATCTCACTACTAGACGATTAACGTTTTGAGATTGCTCTTTCATCTTCTTCTTCATGATACCAAATGATATCATTTACAAAATAATCCATTTAAAACCCTCCATCAATCCATCACCCACAATCTCTAATCAATGCGAGTCTTAATCTTCCAAGGCGTTTGGAGAGGCTATAAAAAGTCTTCCTCTCCAATTTGCAAACAGGCTGCTCCTCCTCCACCATTTAGGTACGGTTGCTGCGTTTCTAGAGGCCAGGAACATCCGCTGTGGTGATGCCTTCAAGCTCCACCACTTCGTTCATTGCTCACTAATACAACACTGAAAATTATACTGGTCACAACCGATTTGAATTCAGAGAAATGTAAGCAGCTACGATGAAGAATAAGG…	604	1	AT2G20930.1			similar to unknown [Populus trichocarpa] (GB:ABK93191.1); contains InterPro domain Longin-like; (InterPro:IPR011012); contains InterPro domain Sedlin; (InterPro:IPR006722)	84.62	13	2	0	284	322	25	37	0.008	29.3
MMN1.Contig_1118	GGAGGTGAAGAAGAAGAAGTCTCCTCGGATCGGGATCAGGTTTGTGGATTGGGAAAGAGAGAGATGGCGTCGGGGTGGGGAATAACGGGAAACAAGGGGAGATGTTACGATTTCTGGATGGATTTCAGCGAGTGTATGTCTCACTGCAGAGAGCCCAAGGATTGCTCTCTTCTTCGTGAAGACTACCTCGAGTGTCTCCACCATTCCAAAGAGTTCCAACGAAGAAACAGGATATACAAAGAGGAACAGCGTAAACTAAGAGCTGCTTCAAGGAAAGGTGAAGAAACTGGCGATGCTACTCATACTCATCACTGATCAAAGTTTTTTTCTCCTTCTACTCCTCCAAGTTTGCATCTCTCGCAGCTGAGAAGAAGAAGAATAAGGAAGATTCTATATGTT…	583	1	AT3G62790.1	NADH-ubiquinone oxidoreductase-related		similar to NADH-ubiquinone oxidoreductase-related [Arabidopsis thaliana] (TAIR:AT2G47690.1); similar to NADH-ubiquinone oxidoreductase-like protein [Camellia sinensis] (GB:ABY77914.1)	98.7	77	1	0	64	294	1	77	5e-43	170
MMN1.Contig_1119	GAGTCTCTCAACTGGTTTGGTCGACTGGTGCAGATGGCGGCAAACCCCAAAGTTACGTTCTGCCTTCTCACCGTGCTGTAAAACTCCAGAGCAAATGGCTGTTCCTGGGACTGAGAGAGCGTGCTCGTTATTGCTCGACTGATTCAGTTGCTCCGTGGCCGTGTCCTGCTCCTGCCCTGATCCGTGCAGAAGGTGTGGGGTGCCAGGTGTGCTATGTCCTTTGTGCTGATCTAGATGATGATGGATATGCTGATGAAAGGAGGTCATGTCCCGGGCGAGCAATAACTCAGAGTCTACGGGGTGATTGGAACCGTGTTGTTATTCGGTGTGAGTGTGTGGAATGTTACCTTGGTCTATTTCGGTGTTGGGCTCGGATTTGTGATTTAGTATGTATTGTTT…	788	1	AT4G10170.2	synaptobrevin-related family protein		similar to unknown protein [Arabidopsis thaliana] (TAIR:AT1G33475.1); similar to unnamed protein product [Vitis vinifera] (GB:CAO44515.1); contains InterPro domain Longin-like; (InterPro:IPR011012); contains InterPro domain Longin; (InterPro:IPR010908)	38.1	42	23	2	264	380	206	246	2.9	29.3
MMN1.Contig_112	GGAGGAAAATTTATTTGCAATCAAATAAAGTTTCCTTTGCAATCCTTTGTAATTTTAATTATATAAAAATCAGAAAACATATAAACCAATCGTCTTGTAAGCGCAACGTGCAAGTTGATACATACACACATTTTCAGTGCTTTTGTTTTGTATAATATTTGTTCAAACGATCAAAAAAAAAAAAA	185	3	AT3G48190.1	ATM (ATAXIA-TELANGIECTASIA MUTATED)	encodes a homolog of the human ATM gene, which is mutated in ataxia telangiectasia, a chromosome instability disorder. Characterization of mutants suggest a role in repairing DNA in response to ionizing radiation as well as during meiosis. The protein has	Identical to Serine/threonine-protein kinase ATM (ATM) [Arabidopsis Thaliana] (GB:Q9M3G7;GB:Q9M4D7); similar to PWWP domain-containing protein [Arabidopsis thaliana] (TAIR:AT5G40340.1); similar to hypothetical protein OsJ_000051 [Oryza sativa (japonica c	37.93	29	18	0	51	137	3600	3628	3.7	26.6
MMN1.Contig_1120	GATACTTTCACCGTATTATTTATACTACCCCTTTCCCAAAAAAGCTTCCAAAGATGGTAACCGCTCCAATCCTGCTTTCCATCTGAAGAGTGGTCGTGCTTCTAAGACGGTTTTGACGCGGCTTTGTGAGGCAGAACGTCAAGAAATCTGGAGAACTCATGGGGTTTGACTTGCTCTTGATTAATGAAAAGGTACGCATATATCTACTTTTCCTTTATGCTCATATAAATAATTTTCTTTTTTTGGTAAAAACACTGATTATCGATCTGGGAAAGCTCCGATTAGTTTCAATCCTTACGGTGGGAATATGGAGAGATTATAAAGTCGCAACACCGTTCCCGTACCGAGATAAGCCTTTCAAGATTTAATACACTATAATATTGGAAATAATTGTCAGCT…	789	1	AT4G20840.1	FAD-binding domain-containing protein		similar to FAD-binding domain-containing protein [Arabidopsis thaliana] (TAIR:AT4G20830.1); similar to electron carrier [Arabidopsis thaliana] (TAIR:AT1G11770.1); similar to FAD-binding domain-containing protein [Arabidopsis thaliana] (TAIR:AT4G20830.2);	33.71	89	56	4	236	493	396	478	0.0007	38.1
MMN1.Contig_1121	GACAGCACATAAAAGCACCAAAAGAAGAAGAAACAAAAATTACAACTATTTTAAATCAAAGAGAAGTAAGAGAATAAATGGCAGGTTCTAACTGTGGATGTGGTTCCGCTTGCAAATGTGGTGTCTCTTGCAGGTAAACCCTAGTTTCTATATCTTCTTTGCTGCCTTTACATCATTAGATGCATATATACATGTGATTTCTCAATTAGTCACTTTTCATCATATTAGTTATCAAAATCTCAAACCCTTTTAAAAAAAATTTGTGGTGAAGTTGCGAGAAGAACTACAACACGGAGTGCGACAACTGCAGCTGCGGGTCAAACTGTAGCTGTGGAGACAACTGCAGCTGTTGAAGGAAAACCACATGCATGCAGGAAAACCGAGGGGAAATATGTGTTT…	564	1	AT1G07610.1	MT1C (metallothionein 1C)	one of the five metallothioneins (MTs) genes identified in Arabidopsis. MTs are cysteine-rich proteins required for heavy metal tolerance.	Identical to Metallothionein-like protein 1C (MT1C) [Arabidopsis Thaliana] (GB:Q38804); contains InterPro domain Plant metallothionein, family 15; (InterPro:IPR000347); contains InterPro domain Mollusc metallothionein, family 2; (InterPro:IPR001008)	88.89	18	2	0	78	131	1	18	0.0001	42.7
MMN1.Contig_1122	TACTTTGGTGTCTACTGTGTTGGTCGTCTTGTCTGTTGAATCAGATGTCAAATAAAGTTGGCTGAATAAGCTTTTGGTGTTTATGTTCCATTATGTTCCTAGCATCAAACTCTCTTTCTGGAGTTTTGCCTTTGTAAACGTGTTTGTTACTTCTGGTTCAAATCTGAATTCGATCGTTTTATATC	185	1	no significant hit
MMN1.Contig_1123	GCTCAACGTTTCAGACCCACTTCGTCTCCTTCCTTTCACAACATAACTCCCTCTCTCTTTCTCTCTCAAATGGAGACATCAGCGACGAAGCTCCACCTCGACCAAATCATAGCTCTTAAACTTCTCGGCAAAGGCGCCACCGGAACCGTTTTCCTCGTCCACGACTCTGTTTCCGACTCCTCTGCTTCTTCTCCCTTCGCTCTGAAGCTCGTCGACAAAGCCACCGCCAAATGGGAAACTCAGATTCTCCGACGTCTCTCCGACGGAGAATCGACGGAAAACGTAACGGTGAGTGGGTTTGGTGTAAAGGAATATTTCGAGAAACTGAGGACGCCGTTACCGCACGAGTGTCCTGAAAACAATCCGTTTGTTGATTTCTGATCCACGCGTGGGAGAATC…	634	1	AT1G51170.1	protein kinase family protein		similar to protein kinase family protein [Arabidopsis thaliana] (TAIR:AT3G20830.1); similar to hypothetical protein [Vitis vinifera] (GB:CAN67877.1); contains InterPro domain Serine/threonine protein kinase; (InterPro:IPR002290); contains InterPro domain	74.63	67	11	1	82	264	14	80	4e-14	74.7
MMN1.Contig_1124	GAAGCCTTGTATACAATTACTTGCTTGGTTAAGGTTAATTAGTTTCAAAAATGATTTATCATAAAACACTTCCCATAGTCTTTTTCTTTGCATTTATCACCCTATACCTTGCAATCTTAGCAGATGCGGCTACGTTCACAGTAAGGAACAGTTGCCCATATGTTGTGTGGGCTGCCACATCTGCTCCGGGAAAGCCTGGCGGTGGGAAGCGACTCAATCAAGGCGAAACGTGGATCATTACTGGTGATCCAGGTACCACTCAGGCTCGGATTTGGGGTCGCACCAACTGCAACTTCGATGCATCTGGAAGAGGTGGATGCCAAACTGGAGATTGTAATGGTGTCCTTGAGTGCACATCTTATGGACGAGCACCTAATACGTTGGCAGAATATGCTCTCA…	796	1	AT4G11650.1	ATOSM34 (OSMOTIN 34)	osmotin-like protein	Identical to Osmotin-like protein OSM34 precursor (OSM34) [Arabidopsis Thaliana] (GB:P50700;GB:Q9T0D2); similar to unknown protein [Arabidopsis thaliana] (TAIR:AT1G75050.1); similar to osmotin-like protein I [Gossypium hirsutum] (GB:AAQ74156.1); similar t	55.33	197	86	3	75	659	5	196	5e-59	224
MMN1.Contig_1125	GACACACCCAACCAACTTTAATCTCTCTCTCACACACACACACACACAAAGAAATGGCCGATCAGCTCACCGATGATCAGATCTCCGAGTTTAAAGAAGCTTTCAGCCTCTTCGACAAGGACGGAGATGGTTGCATCACAACAAAAGAGTTAGGCACAGTGATGAGGTCACTCGGACAGAACCCGACAGAAGCAGAGCTTCAAGACATGATCAACGAAGTGGATGCGGACGGGAACGGAACCATAGACTTCCCCGAGTTTCTCAACCTGATGGCTCGTAAGATGAAGGACACGGACTCGGAGGAGGAGCTCAAGGAGGCGTTCAGGGTTTTCGACAAGGACCAGAACGGTTTCATCTCCGCTGCGGAGCTGAGGCACGTGATGACCAATTTGGGGGAGA…	820	1	AT2G27030.3	CAM5 (CALMODULIN 5); calcium ion binding	encodes a calmodulin that has higher affinity to kinesin-like calmodulin binding motor protein than CAM4 or CAM6.	Identical to Calmodulin-2/3/5 (CAM5) [Arabidopsis Thaliana] (GB:P25069); similar to CAM2 (CALMODULIN-2), calcium ion binding [Arabidopsis thaliana] (TAIR:AT2G41110.1); similar to CAM3 (CALMODULIN 3), calcium ion binding [Arabidopsis thaliana] (TAIR:AT3G5	93.37	181	11	1	54	593	1	181	2e-83	305
MMN1.Contig_1126	AGAAGAGCATTTATCTTCAGCCTTAAGTTCAGAGGAAGAGAACAAGGCTGAGAACCCATCGGAAGATAGAGACATGATTGATGTTGAAGCCAGCGTTCAGCCAGAGAATGTGTCCACAAATCTAGATGAAACTGAGGAGCCCACACAGAGGGGTGAAGTTGGTAATGCAAGCGTTCAATCTGAAGATAATGTGGCCACTGGTGGCTTGGTGGAGAAAGAAGAATCGGAGGGGCAACAAGAGCATTTGTCTTCAGCATTAAGTTCCCAGAAAGAGAACGAGGAAAGCTTGCCAGTGGAGGATCCAACAGCTGGTGGTTTAGACGAACCAGAGGCTAAGTGCTCTGTCTCAGAATCTGACGTTAAAGGAGATGGTAAGAAATGTGTTGGAACTAGCGAATC…	730	1	AT2G28290.3	SYD (SPLAYED)	Encodes a SWI2/SNF2-like protein in the SNF2 subclass. Homozygous plants with null mutations exhibit premature termination of the meristem and carpelloid structures from the inflorescence meristem. Co-activator of floral homeotic gene expression. Acts wi	similar to ATCHR12, ATP binding / DNA binding [Arabidopsis thaliana] (TAIR:AT3G06010.1); similar to unnamed protein product [Vitis vinifera] (GB:CAO71034.1); similar to hypothetical protein OsI_021625 [Oryza sativa (indica cultivar-group)] (GB:EAZ00393.1)	25.68	148	105	4	59	487	2234	2377	0.0001	43.5
MMN1.Contig_1127	GAAGAGTTAGAATCAAATTCAAGAAAAACAAAATTCAACTAATAATGTCGATGATTCCGACCTTCTTCGGCAACAACAGGCGCGGGGGCAACAGCTTCTTCGATCCGTTTTGTCTAGATGTTTGGGACCCGTTCAAGGACTTTCCCTCATCTTCCTCTTCGTTTTCCTGAGAAAACTCTGTGATCGTGAACGCGCGTGTGGACTGGAGGGAGACGCCGGAGGCGCACGTGTTCAAGGCGGACTTACCTGGACTGAAGAAGGAGGAAGTGAAGGTCGAGGTCGAGGACAACAACGTGTTGAAGATCAGTGGTCAGAGGCACGTGGAGGAGGAGGACAAGAGCGACACGTGGCACCGCGTGGAGAGGTCGAGCGGACAGTTCACGAGGAAGTTTAGGCTGC…	687	1	AT2G29500.1	17.6 kDa class I small heat shock protein (HSP17.6B-CI)		similar to 17.8 kDa class I heat shock protein (HSP17.8-CI) [Arabidopsis thaliana] (TAIR:AT1G07400.1); similar to 17.5 kDa class I heat shock protein [Carica papaya] (GB:AAR25848.1); contains InterPro domain HSP20-like chaperone (InterPro:IPR008978); cont	78.21	156	34	2	45	512	1	152	8e-54	206
MMN1.Contig_1128	GAACAAATCGAAGAGGTTAGATGGATCGTGACAGTAATGATGATGGACATATTCCTTTTAGGAGCCTTTCTTGCTACCAAGAGATTTGTAGGCTTGCTGATAAGGATTGTCAGTTCTCATCAATTCCAAGATATCCGCTTTTCGTGAGAGACGTGTATGATATGGTGGATGATCCTTCAACTGATTCAGTTGTCTCGTGGAGTGATAGTGGCAAGAGCTTCATCATTTGGAAGGAATCTGAGTTCCTAGGAGATGTTTTTCCTAGGTGCTTTTCCTGCGATTACAAAGATATGACATCCCTCACCGCCTGGTTTAATGCCATGGGATATAGTAAAGTTGAAGAATCTGTGCATTGGGAATACACAGGCAATTATTTGGTGAGAGGCCAGCCTCCCCACC…	730	1	AT4G18880.1	AT-HSFA4A (Arabidopsis thaliana heat shock transcription factor A4A); DNA binding / transcription factor	member of Heat Stress Transcription Factor (Hsf) family	Identical to Heat stress transcription factor A-4a (HSFA4A) [Arabidopsis Thaliana] (GB:O49403;GB:O82078); similar to AT-HSFA4C (Arabidopsis thaliana heat shock transcription factor A4C), DNA binding / transcription factor [Arabidopsis thaliana] (TAIR:AT5	40.21	97	58	2	135	425	14	107	1e-14	76.6
MMN1.Contig_1129	GAAAACAACAAGCAAACCCAAATCAATTCGACTTACTACTACTACATCGATCTCAGTTTCGTACCTCTAGAAAAAATCAATGGCGCCCAAGGCAGCAGAGAAGAAGCCCGCGGAGAAGAAGCCTGCCGAGAAAGCACCGGCGGAGAAGAAGCCAAAGGCCGGGAAGAAGCTCCCGAAGGATCCCTCCGCCGTCGCCGGAGACAAGAAGAAGAAGCGGTCCAAGAAGAGCGTCGAGACCTACAAGATCTACATCTTCAAGGTGCTGAAGCAGGTGCACCCCGACATCGGGATCTCGAGCAAAGCCATGGGGATCATGAACAGTTTCATCAACGACATCTTCGAGAAGCTCGCCGGCGAGTCTTCCAAGCTCGCGAGGTACAACAAGAAGCCCACGATCAC…	669	1	AT5G22880.1	H2B/HTB2 (HISTONE H2B); DNA binding		Identical to Histone H2B.10 [Arabidopsis Thaliana] (GB:Q9FFC0;GB:Q96516); similar to HTB1, DNA binding [Arabidopsis thaliana] (TAIR:AT1G07790.1); similar to unknown [Populus trichocarpa] (GB:ABK92758.1); similar to unknown [Populus trichocarpa] (GB:ABK94	98.1	105	2	0	188	502	41	145	6e-46	180
MMN1.Contig_113	GACAATTCAACTCTTACTTCGATTCTTATTCATCATCAAACTTTCTCGATCGAAAAAAAATGTCGGGCCGTGGAAAGGGAGGAAAGGGTTTGGGCAAAGGAGGAGCCAAGCGTCACAGGAAGGTTCTGAGAGACAACATCCAAGGGATCACCAAGCCGGCGATTCGGAGACTGGCTCGTAGAGGTKGAGTCAAGCGTATCAGTGGTCTCATCTACGAGGAGACGCGTGGCGTCCTCAAGATCTTTTTGGAGAACGTTATTCGTGACGCCGTCACCTACACCGAGCACGCTAGGAGGAAGACGGTGACTGCGATGGACGTTGTCTATGCGCTGAAGAGGCAWGGGAGGACTCTCTACGGGTTCGGCGGTTAAGCGTTTTCTTAGATTCGCGTTTGCGTTT…	587	2	AT5G59970.1	histone H4		Identical to Histone H4 [Arabidopsis Thaliana] (GB:P59259;GB:P02308); similar to histone H4 [Arabidopsis thaliana] (TAIR:AT5G59690.1); similar to histone H4 [Arabidopsis thaliana] (TAIR:AT3G45930.1); similar to histone H4 [Arabidopsis thaliana] (TAIR:AT3G	97.56	82	2	0	123	368	22	103	4e-39	157
MMN1.Contig_1130	CGAGTTTGACCGGCCGTTGGTCGTTTTCGACCGTAGCTTCCGTAAGGACGGTTCTATTTACATGAACGCCACCGGGAACAACCCGTCGATACACCCGCAATGGCAACCTGAATACTTCGGCGACGCAATCATCGTTAACGGAAAGGCATGGCCGAGATTATCCGTCCGGCGCCGGAAATACAGGTTCCGCATCATAAACGCCAGCAACGCTAGGTTTTTCAGGTTCTTCTTCTCCAACGGTCTCGACTTCTTGGTCGTTGGTTCCGACTCAGCGTATTTGTCTAAACCGGTCACGACCATAGTCGGTTCTCTTGTCTCCGTCGGATATATTAGATGTTGGCTTTGACTTTTCTAAGTCTCCGTCGCTTACGGATGTGTTCGTCTATGACTCGCCGTATC…	799	1	AT1G23010.1	LPR1 (LOW PHOSPHATE ROOT1); copper ion binding / oxidoreductase, acting on diphenols and related substances as donors, oxygen as acceptor	Encodes a protein with multicopper oxidase activity.	similar to LPR2 (LOW PHOSPHATE ROOT2), copper ion binding [Arabidopsis thaliana] (TAIR:AT1G71040.1); similar to hypothetical protein [Vitis vinifera] (GB:CAN78466.1); similar to hypothetical protein OsJ_000201 [Oryza sativa (japonica cultivar-group)] (GB:	92.93	99	7	0	2	298	233	331	4e-52	167
MMN1.Contig_1131	GATCAACCTCCATGTCCGATATATATCTAACAGAGAAGTAACTCAAATTTTAATTTTCTAGTAGACTAGTTTTTTTTTTCGTGGATTATTATCTAAGAAGAGAGAAAATGTTGGGAATTTTTAGCGGAGCTATAGTATCATTGCCGGAAGAGCTGGTGGCCGCCGGCAGCAGAACTCCGTCGCCGAAGACAACCGGAGCGGCTCTAGTTAACAAATTTGTCGAGCAAAATCCATCTGTTGTGACCGTACAAGTCGGAGACAATGTGCAGCTTGCCTACACCCACCACAAAGAGAGTCCTCTCCGGCCAAGGTCATTTGGGGCGAAGGATGAGATATTCTGCTTGTTCCAAGGCTCACTTGACAACTTAGGAAGCTTGAAGCAGCAATACGGGCTTGCTA…	811	1	AT5G19140.1	auxin/aluminum-responsive protein, putative		similar to unknown protein [Arabidopsis thaliana] (TAIR:AT5G43830.1); similar to aluminum-induced protein [Brassica rapa] (GB:ABV89631.1); contains domain PTHR11772 (PTHR11772); contains domain G3DSA:3.60.20.10 (G3DSA:3.60.20.10); contains domain SSF56235	91.45	234	20	0	108	809	1	234	2e-121	431
MMN1.Contig_1132	GAATTCATTGGTTTGGTATAGCTGGCTCGGTGGAGTTATCATTGGAACCATGACCGGTGCTAACATGGTTTTGGAAGATCATTACCGAGCCGGTCCACGCAATGTTGTTATAACCGGAAGCACGAGGGGACTAGGGAAAGCACTTGCTAGAGAGTTTCTTCTCTCTGGAGACAGAGTCATCGTTACATCTCGCAGTTCTGAATCTGTTGATATGACTGTGAAAGAGCTTCAGCAAAACCTCAAAGAGATTATGAGTAAAGCTAGTGAATCAGATAGAAAGAAACTGGGTTTTGCTAAAGTGGTTGGTATTGCCTGTGATGTTTGTAAACCAGAGGACGTTGAGAGGTTGTCCAGTTTTGCTGTAGAAGAGCTTGGTTCCATTAACATATGGATCAACAA…	746	1	AT4G13250.1	short-chain dehydrogenase/reductase (SDR) family protein		similar to short-chain dehydrogenase/reductase (SDR) family protein [Arabidopsis thaliana] (TAIR:AT5G04900.1); similar to Os01g0227100 [Oryza sativa (japonica cultivar-group)] (GB:NP_001042468.1); similar to unnamed protein product [Vitis vinifera] (GB:CA	90.43	230	22	0	2	691	130	359	3e-116	414
MMN1.Contig_1133	GATATTCACACACTTACATCTAAAACACTTTGAAACTTTTTAAGGTTTTCAGCAATATTCTTTTCTTGTACAATGGCTAACAAGAACAACTACATTGTCGTCGCGTTCGATTTCGACAAGACGATTATTGACGTGGATAGCGATAATTGGGTCGTCGATGAACTTGGTTTCACCGAGTTGTTTGACCAGCTTCTTCCGACAATGCCTTGGAACTCTCTCATGGATAGGATGATGAAGGAGCTTCATGATCATGGTAAAACCATTGAAGAAATCAAACAAGTCTTGAGAAGAATCCCTATTCATCCTCGTGTCATCCCTGCCATCAAATCCGCTCATGCTTTAGGGTGCGAGCTGAGAATAGTGAGTGACGCGAACACGTTCTTCATCGAAACGATCGTT…	770	1	AT1G17710.1	phosphoric monoester hydrolase		similar to phosphoric monoester hydrolase [Arabidopsis thaliana] (TAIR:AT1G73010.1); similar to putative phosphatase [Phaseolus vulgaris] (GB:ABP52095.1); contains InterPro domain HAD-superfamily hydrolase, subfamily IB, hypothetical 1 (InterPro:IPR006384	88.65	229	26	0	82	768	3	231	9e-121	429
MMN1.Contig_1134	CAAAAGGGGGACGTCGAGCATCTCTCTGTTCGACACTTGCTACGACTTCTCGTCTCTCTCCACCGTGAAAGTCCCGACGGTGGCGTTTCATTTCACCGGTGGGAAGACGCTTAATCTGCCGGCGAAGAATTACTTGATACCTATTGATGATGCGGGGACGTTCTGCTTCGCTTTTGCTCCGACGTCGTCTTCGTTGTCGATCATCGGGAACGTGCAGCAGCAAGGGACACGCATCACTTACGATCTAGCGAATCATCTTATCGGGTTGTCAGCTAATAAATGCTAAGGTGGATGATTAGTAGTTTTACAGATATATCAGTAAAACCCTTTAGTTCTTGGTTCTTTAATGAAAAATAAAATCTGAAGTGTGGATTCCTTAGAAAA	384	1	AT3G18490.1	aspartyl protease family protein		similar to aspartyl protease family protein [Arabidopsis thaliana] (TAIR:AT1G25510.1); similar to unknown [Populus trichocarpa] (GB:ABK94105.1); contains InterPro domain Peptidase aspartic, catalytic; (InterPro:IPR009007); contains InterPro domain Peptida	88.3	94	11	0	2	283	407	500	5e-45	176
MMN1.Contig_1135	GATCCAACCAAATCCTCTCGAAGCAGAGTAACAAGAGGGAAGCCAGAAAAAAAATGACGACAATGGCGACGCAAGGGGCTTTTCTCCGATTACGAATGACCTCATCCTCAAAGTCCATCGCTAAGCCAACTGAGCTCAGCTTCCTCAACTCCCAGCTCAGCGGCTTAAGAATCTCGCAGGGTCCCTCCACTGACGTCATCAACCGCATCTCCCTTCCTTCCTTCCCTGGTCTTCAGCCAATCGTCGCCCGGAGGATCTGTCCTTTTACTGGGAAGAAAGCGAACAGAGCCAACAAAGTCTCCTTCTCTAACCACAAGACCAAGAAGTTGCAGTTCGTCAACTTACAGTACGAGAAAGTCTGGTGGGAAGCTGGCAAACGCTTCGTCAAGCTTCGTTTAT…	621	1	AT2G33450.1	50S ribosomal protein L28, chloroplast (CL28)		Identical to 50S ribosomal protein L28, chloroplast precursor (RPL28) [Arabidopsis Thaliana] (GB:O22795;GB:Q8VY79); similar to unknown [Populus trichocarpa x Populus deltoides] (GB:ABK96762.1); contains InterPro domain Ribosomal protein L28; (InterPro:IP	86.99	146	15	3	54	479	1	143	6e-63	236
MMN1.Contig_1136	GAAAAAATTTACTCTATATGAAGTACGAGATAAGAGAATAATCAATGTCATTAACGTCCAATTATGCTACATGAAAAACTTTGTTCATTTATGAATGGGAGTTCCTATCAACTGACTTCTATCTCGAAAAAGCATATTCATAAAAAAATTTGGAAAACGAAGGAATGTTGTACATCGATGAAAGCTTTTACCTTAGATAAATCTCTTTCTACAGGCTATTCTGATTTCCTTGAATTTGGACCATGAAACCTCCATGTTCGCCGCCTAGCTCCTCTACAATTTTTGTGTACCCTCCTATGACATTGCGACTCCATTTGGGAATTTAACTATTTCATCTCTGTATCCTACCAAAACGGGGGAAGGACTATCGGTCGAATTCTGCAAATGAAAAAACACAGG…	787	1	AT1G11840.4	ATGLX1 (GLYOXALASE I HOMOLOG); lactoylglutathione lyase	Encodes a glyoxalase I homolog ATGLX1.	similar to lactoylglutathione lyase, putative / glyoxalase I, putative [Arabidopsis thaliana] (TAIR:AT1G67280.1); similar to putative lactoylglutathione lyase [Brassica rapa] (GB:BAF81517.1); contains InterPro domain Glyoxalase/bleomycin resistance protei	51.52	33	16	0	526	624	157	189	3e-09	33.1
MMN1.Contig_1137	GAACTCAAAATCAAAACCATACAACATGGATAATAAAACACATACGACACTGCTTTTCTCGCTCCTGTTTTTCATCACACACCTCACGAACGCGTCATCAAAAGATCAATGTAACCAAAACGACAAAAAGACCCTCCTCAAGATCAAGAAGTCCCTAAATAACCCTTACCTCCTCGCCTCTTGGGACCCTAAAAGCGACTGCTGCGCCTGGAACAGCCTCGAGTGCGACGACGCCACCGTTAACCGCCGCGTCATCTCCCTAACCATATTCTCCGCTCAGATCTCCGGTCAGATCCCTCCTGAAGTCGGTGACTTACCGTATCTTCAGAAGCTTGTCTTCCGCAAAATCACTAACCTCACCGGTCAGATACCACACACCATCACCAAGCTCAAGTATCT…	803	1	AT5G06860.1	PGIP1 (POLYGALACTURONASE INHIBITING PROTEIN 1); protein binding	polygalacturonase inhibiting protein 1 (PGIP1) mRNA,	Identical to Polygalacturonase inhibitor 1 precursor (PGIP1) [Arabidopsis Thaliana] (GB:Q9M5J9); similar to PGIP2 (POLYGALACTURONASE INHIBITING PROTEIN 2), protein binding [Arabidopsis thaliana] (TAIR:AT5G06870.1); similar to polygalacturonase inhibitor	73.73	236	61	1	98	802	21	256	4e-88	321
MMN1.Contig_1138	ATTGTTTCTGATGGTGCAAACAGATACAGATCAAAGAATGAGTCTTGATTTGAATCTGTACTCTTTAGCAAAACCCTTGTCTCAATTTCTCAACGATGTGTCTAAAATCAAAGACAATCATTCAAAACTGTTTGAAATAGATGAATATGTCGGAAAAATGGAGGAAGAGAGGAAGAAGATCGATGTTTTCAAACGTGAACTCCCTCTATGCATGCTCTTGATGAACGAAGCGATTGAGAGGTTGAAGGAAGAGGCTTCATCAGTAAAACTGGAAATTGATAATAAGAAGAACTGGATGAACTCTGCCCAGTTATGGATCTCGAACACTAACTCCCAGTTGCCATCGACAAACGGAGAAGAAGACCGGTGTGTGACTCAGACCTGTAGTAATAATAATAA…	776	1	AT4G37180.1	myb family transcription factor	myb family transcription factor, contains Pfam domain, PF00249: Myb-like DNA-binding domain l; also isolated as a putative cytoskeletal protein in a yeast screen	similar to myb family transcription factor [Arabidopsis thaliana] (TAIR:AT2G03500.1); similar to hypothetical protein [Vitis vinifera] (GB:CAN83122.1); contains InterPro domain Homeodomain-related; (InterPro:IPR012287); contains InterPro domain Homeodomai	57.74	310	76	10	11	775	1	306	2e-71	265
MMN1.Contig_1139	GATTTTTGGAATTAGGGTTTTAGAGCTGCCGTGTTCCGCCGGATCATCACCGTTGCCGCCTCAAGCAAAGATGCCGTCGCACAAGACGTTCATAATCAAGAAGAAGCTTGGGAAGAAGATGAGGCAAAACAGGCCTATCCCTGGCTGGATCCGTCTCCGTACCGATAACAAGATCAGGTACAACGCTAAGCGTAGGCATTGGCGCCGTACCAAGCTCGGGTTCTAGATCATCCGAGCTCGCTGCCATGACTCTGATTCGTTCGAGTTTTGCTATTTTACTTTCGGAATTGTGGTTAAAGTTTTAGTTTTTATCTTGTGGATGTTAAATCTTAAAAGACTTGCGTATTGCATGAATAATATATTATGAGTATCTAAAGTTACACCCTTTCTATT	393	1	AT3G02190.1	60S ribosomal protein L39 (RPL39B)		Identical to 60S ribosomal protein L39-2 (RPL39B) [Arabidopsis Thaliana] (GB:Q8L8W6;GB:Q9SRT6); similar to 60S ribosomal protein L39 (RPL39C) [Arabidopsis thaliana] (TAIR:AT4G31985.1); similar to unknown [Populus trichocarpa] (GB:ABK93945.1); contains Int	94.12	51	3	0	71	223	1	51	6e-17	82.8
MMN1.Contig_114	GAACTCACTCTTTCTTGKSGGAAGAAACGTTAAGAAGCAACAAAAAAACTCTACAGATGGCGATGATGTCAGCATCTTCGGTGTTTCYTTTGCCGGCCAACGTCACGGCTCCCGCTGGCGCTTCGTCGTCCAGGAACTCCGTGTCYTTCTTACCGATGAGAAACGCCGGTTCTAGGCTCGTAGTCAGAGCAGCCGATGAGGCGGCTCCAGAACCAGCTGCGCCGGAAGGTGCTCCAGCAACTACCGCGGCGCCGGCGGCAGCTGCTGCCACCAAACCCAAGCCGCCTCCTATTGGCCCTAAGAGAGGGGCCAAGGTCAAGATTCTAAGGAGAGAATCCTACTGGTTCAAGAGCGTTGGATCGGTTGTGGCCGTTGATCAGGACCCGAAGACCCGGTACC…	621	2	AT4G28750.1	PSAE-1 (PSA E1 KNOCKOUT); catalytic	mutant has Decreased effective quantum yield of photosystem II; Pale green plants; Reduced growth rate; Subunit E of Photosystem I	Identical to Photosystem I reaction center subunit IV A, chloroplast precursor (PSAE1) [Arabidopsis Thaliana] (GB:Q9S831); similar to PSAE-2 (photosystem I subunit E-2), catalytic [Arabidopsis thaliana] (TAIR:AT2G20260.1); similar to AT4G28750 [Arabidops	81.12	143	27	0	57	485	1	143	2e-41	165
MMN1.Contig_1140	GGGCTATTATCTCAGTGGGAGAGCGCGCCCCTGATAATTGCGTCGTTGTGCCTGGACTGTGAGGGCTCTCAGCCACATGGATAGCTCAATGTGCTCATCACCGCCTGACCCTGAGATGTGGATCATCCAAGGCACATTAGAATGGCGTACTCCTCCTGTTCTAACCGGGGTTTGAAACCAACTTCTCCATCGAGAGGATATATGGGGCGATTCAAGAGAAATCCAGATCCAACTTTCTATTCACTCGTGGGATCCGGGCGGTCCAGAAGGAACCACCACGGCTCCTCTCTTCTCGAGAATCCTTACGTCCTTTATCCACGCATGGACAGCTATCTCTCGAGCGCTCGTTTAGGTTCGGCCTCGATGGGAAATAAAAAAAAGAAAAAAAAAAAACTGAAA…	547	1	AT1G21510.1			similar to unknown [Populus trichocarpa] (GB:ABK93661.1)	43.24	37	16	1	139	234	205	241	2	28.9
MMN1.Contig_1141	GATCATCACAAACATCATCATCATATCTCCCTAGCAATGGCTAATGTTCCACAAATATCTTCTTCAATCCTCCTTACACTATGCCTCACTCTCTTCACCAATCCATCCCTCTCATACTACCTTAACCCCTTACAAGACTTCTGTGTAGCTGATCTCCAAGCTACCCCATCCAACACTGGCTACCCATGCAAGTCTCAAGTCACCTCTGATGATTTCTTCTACTCCGGCTTAGTGCGCTCCACTAAACACTTCAAACCCTAAAGGTGTAGCCGCTAATAAAGCAAACCTCATGACGCTTCCAGGATTTAACACGATGGGAAACTCCTTGTACGACGTAGCATTCGCCCCAGGAGTAGCTAACCCGCCTCTCTCCCACCCTGGTGTGACCTATTGCAGGTA…	780	1	AT1G74820.1	cupin family protein		Identical to Germin-like protein subfamily T member 3 precursor [Arabidopsis Thaliana] (GB:Q9S772;GB:Q1PFD3); similar to germin-like protein, putative [Arabidopsis thaliana] (TAIR:AT1G18980.1); similar to germin-like protein [Ananas comosus] (GB:AAM28275.	79.59	49	7	1	94	231	25	73	5e-43	82.8
MMN1.Contig_1142	AGCGCGAGTCAACCACACCGAGTCACCTCCACCTGTCGACTTTCGTCGTCTCCTTCGCCTACGCGTGGACCTGCTTCGTGAAGGCGCGCGGAGGAAGCGACGAGAGATCGGTGAGCCTCCTCTTCGTCGGAGATTTCAGACACCGGTTAGATCCGCCGCTTCCGGCGACGTACTTCGGGAACTGCGTGTTTCCGGCGGGTAGTTACGACCACGAGGCGGCGGAGTTGTCGAGATTCGTTGCGGCGGTGGAGACCCTGAGCGGTTTGGTGAAGGGGCTGAGTTCGCGGGAGGTAGAGACGGTTGCGGAGGCGTACGCGGAAGCGTTCCGTTTCGTGGAAGGGAGCACGCAGTTCGGGACTGTCGCCGGGTCGACCCGGTTGAGAGTTTACGAGTCGGATT…	779	1	AT3G29670.1	transferase family protein		similar to transferase family protein [Arabidopsis thaliana] (TAIR:AT3G29635.1); similar to malonyl-CoA:isoflavone 7-O-glucoside-6''-O-malonyltransferase [Glycine max] (GB:BAF73621.1); contains InterPro domain Transferase (InterPro:IPR003480)	71.58	190	51	2	6	566	263	451	8e-70	260
MMN1.Contig_1143	GGTCCCTTCGGGGACATCCGATCCAGATGGAACTATACACATAATATTAGAATGCCCCCTGCTCCAGGATGGACACCCACTACTCCACAAATGGTCCAAATTATCGAAAAAAACAAAAAAGAAAAAAAAAAAAAACATGCCCCAACAGGTCCA	153	1	no significant hit
MMN1.Contig_1144	GAAACTCGTAGCGAGAAACATCGATGCATATCTCCATATCTAAGTTTTCTCTCTCTACAATCCTCTCTTGAATAAGACCCTAATTTTTCACGTTTGGGTGGCCGGCGGCGCTCCTCCTCCTCTTTAGTCGCTGGTCGCCCGCCTCTCTTTGCTTTGTTCCCTCTTCGCCTCTCCTCTCTCTCCTCTCCTCTGTTTCCTTTTCGGTGGCTCTGTGTCTTTGCGCTTCCGTACGGGTCAGATCTGGCGCGTCGGACTTGGATCTCCGGAGAAGCAGGGCGGAGGAGTGGATGTGCGGTTCCTCTGGGTGCGTTGAGTGGCGGGGGTTTGGATCTGGTGTCAGATCTGGACTTTGGTTGCGAGATCTCTCTCCTTCCTCTTGCCCTCTCTGCTTGCTCTTCT…	796	1	AT4G38320.1	HHP5 (heptahelical protein 5); receptor	heptahelical transmembrane protein HHP5	similar to HHP4 (heptahelical protein 4), receptor [Arabidopsis thaliana] (TAIR:AT4G37680.1); similar to unnamed protein product [Vitis vinifera] (GB:CAO63551.1); contains InterPro domain Hly-III related proteins; (InterPro:IPR004254)	51.85	27	13	1	467	547	184	209	6.5	28.1
MMN1.Contig_1145	CATCTCGTTCACATAGTATCACAAGAAGAAAATAAATGAGTAACTGTTCACAAAATTTATTTGTTTTGAAAATTATTCCTTGTAACTCCAAATAAGTAGGGAAAAAAATCTATAGGTAACATATTCAATGCAGTCATTTTATATTGGTCACTTTCTAGGGAAAAAATAGTTAGCACAGTCATAAACATAATATATTAGATTCACTAAAATTAAAAGAGAGATAAATTGTTACCTTCTTGAGCTTCTTAGGATCATCAGAATCTATCTCAGAATGATCTGTCGTTGTCGCAACCTAAACAGACACAAAAGACCAATCGAAAATGTAGATATACACAGGCTAAAATATATACAATTGGATTTAGAATGTCTTATAAGTAAAGCTAAGAAGCTCATGTTAAT…	807	1	AT1G62710.1	BETA-VPE (vacuolar processing enzyme beta); cysteine-type endopeptidase	Encodes a vacuolar processing enzyme belonging to a novel group of cysteine proteinases that is expressed specifically in seeds and is essential for the proper processing of storage proteins.	Identical to Vacuolar-processing enzyme beta-isozyme precursor [Arabidopsis Thaliana] (GB:Q39044;GB:Q93VS7;GB:Q9SI79); similar to GAMMA-VPE (Vacuolar processing enzyme gamma), cysteine-type endopeptidase [Arabidopsis thaliana] (TAIR:AT4G32940.1); similar	28.33	60	43	2	476	655	247	289	3.9	28.9
MMN1.Contig_1146	GTCAAGGAGGTTCAGCAATCTCTTATCAAGGCAGCAAAGACGGCAAAGCTAGAAAAGTTTGAGATCCCAGCAAAGATAAAGTTATTGCCGGAGCAGTGGACACCAGAGTCGGGGCTAGTCACAGCTGCTCTCAAGTTAAAGAGGGAGCAAATAAAGGCCAAGTTCAAAGATGAACTCCACAAGCTATATGCCTAAAAATCTTATGTAAACTACTTGTTACACACTTCATATGCTTGGGTTTTGACTACTTTCACTAATAAAGTTTGATCATGATGGGGTTTTCTTC	286	1	AT2G04350.2	long-chain-fatty-acid--CoA ligase family protein / long-chain acyl-CoA synthetase family protein (LACS8)		similar to LACS9 (LONG CHAIN ACYL-COA SYNTHETASE 9), long-chain-fatty-acid-CoA ligase [Arabidopsis thaliana] (TAIR:AT1G77590.1); similar to unnamed protein product [Vitis vinifera] (GB:CAO41136.1); similar to hypothetical protein OsI_018747 [Oryza sativa	85.94	64	9	0	1	192	657	720	6e-25	108
MMN1.Contig_1147	GACACACATCGAACTCTACAAAACCTCTCTCTTATTTCTTAAAGCAAAGAAAAAAATGTCTGGACAACAAAAGGTAGGAAAGGGATTGGGAAAGGGATGAGCCAGGAGGCACAGGAAGGTTCTCCACGACATCATCCAATGAATCACTAACCCAGTTATTCGCCTTTTACCGAGAAGAGGCGGTGTGAAGCATATCTACGTGTTTGATCTACTATGACACTCGCGGCGTTCTCAAGATCTTCCTCAATAACGTGATTCTCGACGCTGATGACTTACACTAAGCACGCTTGGAGGAAGACTGTGACGGCTATGCATGTTGTGTACGCTATGAATAGACATGTAAGGACTCTGTACTGGTTCCGCGGCTGAGGGGATTGAATTAGGGATTTGTAAATCTCG…	561	1	AT5G59970.1	histone H4		Identical to Histone H4 [Arabidopsis Thaliana] (GB:P59259;GB:P02308); similar to histone H4 [Arabidopsis thaliana] (TAIR:AT5G59690.1); similar to histone H4 [Arabidopsis thaliana] (TAIR:AT3G45930.1); similar to histone H4 [Arabidopsis thaliana] (TAIR:AT3G	71.88	32	9	0	101	196	16	47	3e-18	45.4
MMN1.Contig_1148	CTGTGGGACCTGAGCTGCAAGTTATCAACAAGTCTGAGAAACCTATCTCTCTTAAAGCCGATGGTCTTGTTACTCTCACACCTAATCAAGACCAAGAGGCGTCTTCTGAAGTCCTTCCCATTAACTTTGATGGGCTTGCCAAGGCGGTGAAGAAAGGAGACACTATCTTTGTGGGGCAGTATCTATTCACTGGTAGTGAAACAACTTCAGTTTGGCTAGAGGTTGATGAAATTAAAGGAGATGATGTCATTTGCCTGTCAAGGAATGCTGCTACTCTGGCTGGTGCTCTCTTCACTTTGCACGCCTCTCAAGTTCACATCGGTCTGCCAACTCTTACTGAGAAAGATAAGGAGGTTATAAGCACATGGGGAGTTCAGAACAAAATTGATTTTCTCTCAC…	782	1	AT3G52990.2	pyruvate kinase, putative		similar to pyruvate kinase, putative [Arabidopsis thaliana] (TAIR:AT2G36580.1); similar to Pyruvate kinase [Medicago truncatula] (GB:ABE80121.1); similar to hypothetical protein OsI_033900 [Oryza sativa (indica cultivar-group)] (GB:EAY79941.1); similar to	97.31	260	7	0	3	782	41	300	2e-141	498
MMN1.Contig_1149	GGCATTCTCTCATCTCTCAAAGCCAAAGCTCTCTCCCTCTCTCTCTGTCTCTGCTTGTGTAGCCATGGCTAACTCGATAATGGCTTCCTCCAAACCACTCATCTCCCTCTCCTCCTCCACTCAACCAACCCGCGTCAACCTCCCCAAATCCATCAAACTCCCCCAGATCCCCAAACCCATCTCCTCCTCCTCCTCATCCTCCCTCAGCAGCAAGGCTCTGTCTTTCTCCTCCGCCACCGTAAAGTCTCTAGCTTTAATCGCCGCCCTCGCTCCCCCTTCCATGGCCGAAGCGATGGAGAAGGCCCAGCTCTTCGACTTCAACCTGACGCTCCCGATCATCGTCGTGGAGTTTCTCTTCCTCATGTTCGCGCTCGACAAAGTCTACTACTCTCCCCTTGG…	735	1	AT4G32260.1	ATP synthase family		similar to unknown [Populus trichocarpa] (GB:ABK94675.1); contains InterPro domain ATPase, F0 complex, subunit B/B&apos; (InterPro:IPR002146)	91.46	164	14	0	233	724	56	219	1e-55	213
MMN1.Contig_115	GACCTCTTCGATCTCCTCATCTAATCTCATCTCTCTTATCCTCTTCCCATCTCTCTTTCTCCTCTGCTCATCTTTCATTTACTTTTCTTCTTTCAAGCAAATGGATCTGAACGAAGAGGATTACCACCGTCATGCTTCTCACCACCATGCTCCTTTCTATTCGGTTGCGCCCTTCACCACCGCACGCTCGTCAACACCACCACCGGAAAGTGGAGGAGGCACAGGATTGATGAATGAGGCACAGGAGATTGATGGAGGAGGTAGCAGTGGTGGGTCGTGAGCAGAGCCGGCTTGAATGTTGAAGACGAAGAAGCTCGGTGAGGAGGCCGCAGGCGGCGGAGAATATACATTAGGTTTAGATTAGGGTTAGGTATATTTTTAATTTGGTTTAGTATGCTA…	484	2	AT3G47620.1	TCP family transcription factor, putative	Encodes a transcription factor AtTCP14 that regulates seed germination. AtTCP14 shows elevated expression level just prior to germination. AtTCP14 is predominantly expressed in the vascular tissue of the embryo, and affects gene expression in radicles i	similar to TCP family transcription factor, putative [Arabidopsis thaliana] (TAIR:AT1G69690.1); similar to unnamed protein product [Vitis vinifera] (GB:CAO62540.1); contains InterPro domain Transcription factor, TCP (InterPro:IPR005333); contains InterPro	53.33	15	7	0	116	160	25	39	3.6	27.7
MMN1.Contig_1150	GAGACAGCGTTTCATTATCACTTCCGACAAAACTCTTTATACCTTTCCGCACTTCCTTTCCACCGACTTCCTCCATGGCTCCGATTGCTGTTGGCGATGTTGTACCTGACGGATCTATCTCCTTCTTCGACGAGAACGATCAGCTCCAGACTGTCTCCGTTCACTCCCTCGCCGCCGGTAAGAAGGTCATCCCCTTCGGTGTCCCTGGTGCTTTCACCCCCACCTGCAGTATGCAGCATGTGCCTGGATTCATCGAGAAAGCACAGGAGCTGAAGTCAAAGGGTGTTGACGAGATCATTTGCTTTAGTGTGAATGATCCGTTTGTGATGAAGGCATGGGGGAAGACGTACCCAGAGAACACGCATGTGAAGTTTGTGGCAGACGGTTCAGGAGAATACA…	721	1	AT1G65980.1	TPX1 (THIOREDOXIN-DEPENDENT PEROXIDASE 1); antioxidant	thioredoxin-dependent peroxidase	Identical to Peroxiredoxin-2B (PRXIIB) [Arabidopsis Thaliana] (GB:Q9XEX2); similar to TPX2 (THIOREDOXIN-DEPENDENT PEROXIDASE 2), antioxidant [Arabidopsis thaliana] (TAIR:AT1G65970.1); similar to type 2 peroxiredoxin [Brassica rapa subsp. pekinensis] (GB:	94.03	134	8	0	75	476	1	134	1e-59	226
MMN1.Contig_1151	GTTTCCTCTGGTTTGTGAATCTAGTAATATTAGATGTGGTGTGGACCTATCTTGTAGTAGGTTTGTTATTTCTGGATTCTAAGGGGACCTTCATGGAAGTTACCGTGGAGTGTATTCACGGTCAGTCTTCGGTGGGAACCGTCATCCTAGTTGTGTGGTCTAAATTTCTTCTCGTCGGTTATGTGATTTTGGTATCATTTGGGACTGTATTTTTTGGTATTATCGCTTTTATTAATTCCTGCTCGAATGGGTAAATGAGTCATCTTTTTTCGAAATATCTGTCTGAGTGTTTTTTTTTTTCTCTCTAGCATCTTAACCAGATTTTGTTTGACCATGGATGTGTAGCCTGAGGTGATGTGGCTACTATTAATAACCCCATGTTCAGGGAAGGCTGGCTTT…	763	1	AT1G62430.1	ATCDS1 (CDP-diacylglycerol synthase 1); phosphatidate cytidylyltransferase	Encodes a CDP-diacylglycerol synthase, involved in phospholipid biosynthesis.	Identical to Phosphatidate cytidylyltransferase (CDS1) [Arabidopsis Thaliana] (GB:O04928;GB:O48808); similar to phosphatidate cytidylyltransferase, putative / CDP-diglyceride synthetase, putative [Arabidopsis thaliana] (TAIR:AT4G22340.3); similar to phos	38.46	39	24	1	548	664	154	186	0.19	33.1
MMN1.Contig_1152	GGGGAGACAGCGTTTCATTATCACTTCCGACAAAACTCTTTATACCTTTCCGCACTCCCTTTCCGCCGACCTCCTCCATGGCTCCGATTGCTGTTGGCGATGTTGTACCTGACGGATCTATCTCCTTCTTCGACGAGAACGATCAGCTCCAGACTGTCTCCGTTCACTCCCTCGCCGCCGGTAAGAAGGTCATCCTCTTCGGTGTCCCTGGTGCTTTCACCCCCACCTGCAGTATGCAGCATGTGCCTGGATTCATCGAGAAAGCAGAGGAGCTGAAGTCAAAGGGTGTTGACGAGATCATTTGCTTTAGTGTGAATGATCCGTTTGTGATGAAGGCATGGGGGAAGACGTACCCAGAGAACAAGCATGTGAAGTTTGTGGCAGACGGTTCAGGAGAAT…	771	1	AT1G65980.1	TPX1 (THIOREDOXIN-DEPENDENT PEROXIDASE 1); antioxidant	thioredoxin-dependent peroxidase	Identical to Peroxiredoxin-2B (PRXIIB) [Arabidopsis Thaliana] (GB:Q9XEX2); similar to TPX2 (THIOREDOXIN-DEPENDENT PEROXIDASE 2), antioxidant [Arabidopsis thaliana] (TAIR:AT1G65970.1); similar to type 2 peroxiredoxin [Brassica rapa subsp. pekinensis] (GB:	92.59	162	12	0	78	563	1	162	1e-71	266
MMN1.Contig_1153	GATCATCACAAACATCATCATATCTCCCTATAGCAATGGCTAATGTTCCACAAATATCTTCTTCAATCCTCCTTACACTCTGCTCCACTCTCTTCACGACTCCAGCCCTCTCAGACTACCTTAACCCCATACAAGACTTCTGTGTAGCTGATCTCCAAGCTACCCCATCCAACACTGGCTACCCATGCAAGTCCCAAGTCACCTCTGAAGACTTCTTCTACTCCGGCTTATGCTCTCCACTAAACACTTCAAACCCAAAAGGGGTAGCCGCTAATAGAGCAAACCTCATGACGTTTCCAGGACTTAACACGATGGGAGTCTCCATGTACAACGTTGCAGTCGCCCCAGGAGTAGCTAACCCGCCTCACTCCCACCCTGGTGGGACCGAGGCGGGGATCG…	778	1	AT1G74820.1	cupin family protein		Identical to Germin-like protein subfamily T member 3 precursor [Arabidopsis Thaliana] (GB:Q9S772;GB:Q1PFD3); similar to germin-like protein, putative [Arabidopsis thaliana] (TAIR:AT1G18980.1); similar to germin-like protein [Ananas comosus] (GB:AAM28275.	69.89	176	53	1	102	629	33	206	4e-66	248
MMN1.Contig_1154	GACACCATACAGCCTGGTCCGGTCAAAGGTGGAGGCAGTGTGATTGCGATTGTAAAGGACCCTGATGGTTACATGTTTGAGCTCATCCAGAGAGGGCCAACTCCTGAACATCTCTGCCTGGTCGTGCTTCTCGGCGATGAGATTGAAATGAACTCTAACCTCTTGAATCAGGCCCTTGGAATTATACTCTACCGACTGATGGATACATTGGGATGCTGAGTACGACATAGGAGTGAATGAACCTTTTGACTGAAAGGAGTCCATATCTCTGCAAGGGAAGACTAACTTCTTTGAGAATAAAGAGACAGAGTATCACGAGGCTTCTGTTATGGCAATACTCCCGGATGATGAGAACAACTACGATTACGAGATTGATGAGGACTATCGAGAGCTTGTAGC…	785	1	AT1G11840.5	ATGLX1 (GLYOXALASE I HOMOLOG); lactoylglutathione lyase	Encodes a glyoxalase I homolog ATGLX1.	similar to lactoylglutathione lyase, putative / glyoxalase I, putative [Arabidopsis thaliana] (TAIR:AT1G67280.1); similar to putative lactoylglutathione lyase [Brassica rapa] (GB:BAF81517.1); contains InterPro domain Glyoxalase/bleomycin resistance protei	58.21	67	28	0	4	204	112	178	1e-15	80.1
MMN1.Contig_1155	GACACCACATTCAGTTCTCTCTCTCAATCTCTCTCTCTTAAAGATTACCGAGACATACTCTTAGTTTCGGTGAAGAAAAAGAACAATGACGAAAGATGTGGCTGGAGAGAAGGGATCGTTCTCCGGAAAAGACTATCAAGATCCACCACCTGAACCTCTGTTCGACGCTACTGAGCTTGGGAGGTGGTCTTTTTACAGAGCTCTCATAGCTGAGTTCATAGCCACTCTCCTCTTCCTCTATGTCACCGTTATGACTGTCATTGGTCACAAGAGCCAGACCGATCCAGCCCTTAACCCTGACCAGTGTGCAGGTGTTGGTGTACTCGGCATCGCTTGGGCCCTTGGTGGCATGATCTTCATCCTTGTCTACTGCACTGCCGGAATCTCTGGTGGACATAT…	800	1	AT3G54820.1	PIP2;5/PIP2D (plasma membrane intrinsic protein 2;5); water channel		Identical to Probable aquaporin PIP2-5 (PIP2-5) [Arabidopsis Thaliana] (GB:Q9SV31); similar to PIP2B (plasma membrane intrinsic protein 2,2), water channel [Arabidopsis thaliana] (TAIR:AT2G37170.1); similar to plasma membrane intrinsic protein 2-2 [Pyrus	76.52	230	51	2	86	766	1	228	9e-95	343
MMN1.Contig_1156	TGGTGTTTACGGAGTTTACCTCCATGACCCGGTGAGCTTTGTGGCTGTAGTAAGGCCTGATCTATTCACATATAAGAAAGGCGTTGTTAGGGTGGAGACTCAAGGAATATGTGTTGGCCACACTCTCATGGACCAAGGCCTCAAGAGATGGAATGGGAGCAATCCATGGGTGGGATATTCACCAGTGTCAGTGGCGTGGACGGTAGATGTAGATGGTGTTTTGGAATATATCAAAGGGATGCTGATGAAGCCATAAAAAGAATGTGAATGTTTCATTGTAAATGGCATCATCACATTTATCTCTTCCGGTTCTAACTCGATTCTCAATTCAAGATCTGTATTTAAACTGTATAAATGCTAAAATTTGGTAAAATAAAATAAAAGATAATGAATAAAACTC	400	1	AT2G36310.1	inosine-uridine preferring nucleoside hydrolase family protein		similar to inosine-uridine preferring nucleoside hydrolase family protein [Arabidopsis thaliana] (TAIR:AT1G05620.1); similar to hypothetical protein LOC542168 [Zea mays] (GB:NP_001105259.1); contains InterPro domain Inosine/uridine-preferring nucleoside h	94.05	84	5	0	2	253	253	336	3e-44	173
MMN1.Contig_1157	GGAAATACAATCTTCTCTCTCTCGCGAATTACGATCAAGATGCAGATCTTCGTTAAGACACTCACCGGAAAGACGATCACCCTTGAGGTGGAAAGCTCTGACCCGATCGACTACGTTAAAGCCAAGATTCAAGACAAGGAGGGTATTCCTCCGGATCAGCAGAGGCTCATCTTCGCCGGAAAGCAGCTCGAGGACGGGAGAACCCTAGCTGATTACAACATCCAGAAGGAGTCGACTCTTCATCTCGTCCTCAGGCTCCGTGGTGGCATGCAGATCTTTGTCAAGACCTTGACTGGTAAGACGATCACACTCGAGGTGGAGAGCTCCGACACCATCGATAACGTCAAGGCTAAGATACAGGACAAGGAGGGAATCCCGCCCGACCAGCAGCGTTTGATC…	763	1	AT1G65350.1	UBQ13 (ubiquitin 13)	polyubiquitin gene,Columbia ecotype revealed that the gene contained a 3.9-kb insertion in the coding region from mitochondrial DNA.	similar to UBQ3 (POLYUBIQUITIN 3), protein binding [Arabidopsis thaliana] (TAIR:AT5G03240.3); similar to UBQ3 (POLYUBIQUITIN 3), protein binding [Arabidopsis thaliana] (TAIR:AT5G03240.2); similar to UBQ4 (ubiquitin 4), protein binding [Arabidopsis thalian	87.88	198	24	1	4	597	65	261	2e-94	324
MMN1.Contig_1158	GACTCACAAACCAGATCTCAATCTTCTACCTCTCTTCTCTCGAAACCAATCGCAATGGCTCGCACCAAGCAGACGGCAAGAAAATCAACCGGAGGCAAGGCACCAAGGAAGCAGCTAGCCACAAAAGCCGCAAGAAAATCAGCTCCAGCCACCGGAGGAGTGAAGAAGCCGCACAGATTCAGACCAGGAACCGTTGCTCTCAGGGAGATCAGGAAGTACCAGAAGAGCACCGAGCTTCTCATCCGCAAGCTCCCGTTCCAGAGGCTAGTGAGAGAGATCGCTCAGGATTTCAAGACCGATCTCCGTTTCCAGAGCAGCGCCGTCGCCGCTCTCCAGGAAGCTGCCGAGGCTTACCTCGTTGGACTGTTTGAGGACACTAACCTCTGCGCGATCCACGCC…	573	1	AT5G65360.1	histone H3		Identical to Histone H3.2 (HTR1) [Arabidopsis Thaliana] (GB:P59226); similar to histone H3 [Arabidopsis thaliana] (TAIR:AT5G10390.1); similar to histone H3 [Arabidopsis thaliana] (TAIR:AT5G10400.1); similar to histone H3 [Arabidopsis thaliana] (TAIR:AT3G	97.79	136	3	0	55	462	1	136	2e-58	221
MMN1.Contig_1159	GACAATCATCAGATTCAATAACATTTTACACAGAGAGAGCAAAACAACAGTTCTTTAGAGTAATTTTCTGACAATGTCTTCTCTTGGTCATTTACTTGTTCTTGTGTTTCTCTATGTTCCGCTTTTTTACTCAGCTGATTCTCGCAAACCCCAAGTCCTTCATGACACTGGATCTAGCGAAGATGGTGCAAAAGGCACAAGATGGGCTGTTCTAATTGCTGGATCAAGTTATTATTATAACTACAGGCATCAGGCTGACATATGCCATGCATATCAAGTTCTGCGAAAAGGGGGTCTAAAAGATGAAAACATTATTGTGTTTATGTATGATGATATCGCGTTTAACCCTGAGAATCCCAGGCCTGGAGTTATCATCAATAGACCTGATGGTGGAGATGT…	787	1	AT3G20210.1	DELTA-VPE (delta vacuolar processing enzyme); cysteine-type endopeptidase	Encodes a vacuolar processing enzyme with caspase-1-like activity that is specifically expressed in inner integument of developing seeds. Mutants display abnormal seed coat development. It is speculated to be involved in cell death of limited cell layer	similar to GAMMA-VPE (Vacuolar processing enzyme gamma), cysteine-type endopeptidase [Arabidopsis thaliana] (TAIR:AT4G32940.1); similar to hypothetical protein [Vitis vinifera] (GB:CAN70603.1); contains InterPro domain Peptidase C13, legumain; (InterPro:I	76.79	237	53	1	77	781	3	239	3e-102	368
MMN1.Contig_116	GACACCATCAACAACAATCAACATGGCTTCTCAAACTCCATTTCTCTCCATCTCCATCTCCCTCGCCCTCGCCGCCTTTCTCTTCTTCATTACAGTCTCCGCAGATCCCGACATGCTCCAAGACCTCTGTGTCGCTGATCTCTCCTCCGGAATCAAAGTCAACGGCTTCCCTTGCAAAGACGCAGCCAACGTCACATCGCTCGATTTCTTCTCGCAAGGAATAGCGAATCCAGGCCTCACCAACAACACGTTCGGTGCCTTGGTCACAGGCGCGAACGTGATGACCATCCCTGGACTCAACACGCTCGGCGTCTCCCTCGCTCGCATCGACTACGCTCCAGGCGGCTTAAACCCGCCTCACACTCACCCGCGCGCCACCGAAGTCGTCTACGTCCTCGA…	796	3	AT1G09560.1	GLP5 (GERMIN-LIKE PROTEIN 5); manganese ion binding / metal ion binding / nutrient reservoir	germin-like protein (GLP5)	Identical to Germin-like protein subfamily 2 member 1 precursor (GLP4) [Arabidopsis Thaliana] (GB:P94014;GB:O80538;GB:P94097); similar to GLP10 (GERMIN-LIKE PROTEIN 10), manganese ion binding / metal ion binding / nutrient reservoir [Arabidopsis thaliana]	86.55	223	30	1	23	691	1	219	2e-108	388
MMN1.Contig_1160	GGTTTGACATTAAAGGTACATGGTCCGGTTCAATAACAATCGTACCGGGAAAAGGACCGATTATCCTCTATACAGGTGTTAACCAAAACGAAACTCAAATCCAAAACTACGCAATCCCAATGGACCCCTCAGACCCATACCTAAGAAAATGGATTAAACCAGATGATAACCCGCTCGTAATGCCAGACTATACCATGAACGGTTCAGCTTTCCGTGACCCGACCACGGCATGGTTCTCCAAAGACGGGCATTGGAGAACCGTGGTTGGTTCAAAAAGAAAGCACAGAGGGATTGCTTATATCTACAGAAGCCGAGATTTTAAGCATTGGGTCAAAGGTAAGCACCCGGTTCACTCCAAAGAATCAACCGGTATGTGGGAGTGTCCTGATTTCTTCCCGG…	794	1	AT2G36190.1	ATCWINV4 (ARABIDOPSIS THALIANA CELL WALL INVERTASE 4); hydrolase, hydrolyzing O-glycosyl compounds		similar to ATCWINV2 (ARABIDOPSIS THALIANA CELL WALL INVERTASE 2), hydrolase, hydrolyzing O-glycosyl compounds [Arabidopsis thaliana] (TAIR:AT3G52600.2); similar to ATCWINV2 (ARABIDOPSIS THALIANA CELL WALL INVERTASE 2), hydrolase, hydrolyzing O-glycosyl co	71.03	252	73	1	3	758	117	359	5e-102	367
MMN1.Contig_1161	CGAGGAAAGGCTTACGGTGGATACCTAGGCACCCAGAGACGAGGAAGGGCGTAGTAAGCGACGAAATGCTTCGGGGAGTTGAAAATAAGCGTAGATCCGGAGATTCCCGAATAGGTTAACCTTTTGAACTGCTGCTGAATCCGTGGGGAAGCAAGAGACGACCTGGCGAACGGATACGTCTTAGTAGCCGGAGGGTAAGAGACGGAAGGAGATTCCGGTAGTATCGGCTAGCGATGTGGTAGTAGCCTAAGCCGAGAGAACGGGGTTGTGGGAGAGCGTAAGAAT	285	1	no significant hit
MMN1.Contig_1162	GGGGGTGGCCAACCACAAAAAAACCGCTAACTTTTTATCGTGTCTTCCGGACTGCAAAAGCCACCCAGAAAACACGCAAAGGGTCACTATTTTCGTCATCGCGAAACCGCCTCCAATCATCCTGAATGGCTTAAGATGTTTGGCTAGAGAAAATCCGGGCTGCAGCCGTTGAAACCGCTCAAACGACCTGGACAGTTGGCGCGAACCCGATATTACTCGGTGCAGACGAGTGGAACGCGGAGGGCGGGTGGATCGGGTAACTGAGACGGACAAAGTGTGGGGGGGAGCTCGGGTGTGAAGATCTTGAACAGCTATATCCCAGTCACAAGTGCATCTGCAGAAAAAACAACAGCTGCGAATGGTGTGACTGAACTACCTGACGAACGATCTTGGATCGTG…	786	1	AT3G02870.3	VTC4	Encodes a L-galactose-1-phosphate phosphatase, involved in ascorbate biosynthesis	similar to inositol monophosphatase family protein [Arabidopsis thaliana] (TAIR:AT1G31190.1); similar to unknown [Populus trichocarpa] (GB:ABK96128.1); contains InterPro domain Inositol monophosphatase; (InterPro:IPR000760)	34.88	129	77	2	304	669	56	177	6e-12	68.2
MMN1.Contig_1163	GGGGGGATCTTAAAAAACTAAAAAACAATTATATAAAAATGGTAAAAGAAGAAAGAACGTACTCAGCATATATAAAATCCGCGGAGTTGGAAAAACCCGAGGAGGCCCTAGATCCGAACGCCCCGATTAATAAGCATCCCTTGGAGCGAGACAACCTGGCAAAAAACTTCTCCAACTCGCTAGACACAAGAAGAAGCGGCTCAACCCCAGAATACTTTTATTAGCACAACTAGATCGTGGTGTTCGTTCATAATGACCATTCATGGTGCACGAACTTGAGTATGGCCCAGCGTATCATGATCTGTTCCTTTCAAGACGTGCTGTGGCAATATTTTCGCTTACAGATAGGCATTTTTATATCGAAGTTTTAATAGGAACAAACTTATATCTAGTTCTTAT…	811	1	AT4G27890.1	nuclear movement family protein		similar to nuclear movement family protein [Arabidopsis thaliana] (TAIR:AT5G53400.1); similar to salt tolerance protein 5 [Beta vulgaris] (GB:CAC85247.1); contains InterPro domain HSP20-like chaperone (InterPro:IPR008978); contains InterPro domain CS (Int	33.33	63	37	2	12	185	70	132	2.3	29.6
MMN1.Contig_1164	GAAATATATTCTTCGGACCATCTGAGAGGTGCGAACAGAGAGCGAGATTGTGAAGAAGAAGAAGATGAAGCTAACGTGGAACAAGAACCCTAAGAAACGATCTCGTGTAGCTTTACCGAACATCCTCGATGTTCCTTTCGAGAAGGAAGCTCCGGAGACCAAATCTCAGCGCCTAGAAGATGATTTAGAGGTCGTAGAAAATGATGGGAGACTCGATCTCGAAGCGAAGAAGCTCGCAGATTCGTGTACAGCACAAGGAGACAAGCTCGCTGAGGAAGGAAGATACGAGGAGGCTCTAGGGAAATGGGAAGCTGCTCTTAATATCGTGCCTCAAAATGCTGTCATTCATGAACAAAAAGCTCAAGTCTTTCTTGAGATTGGTGATCCATGGAAAGCACT…	769	1	AT1G77230.1	tetratricopeptide repeat (TPR)-containing protein		similar to tetratricopeptide repeat (TPR)-containing protein [Arabidopsis thaliana] (TAIR:AT4G08320.1); similar to unnamed protein product [Vitis vinifera] (GB:CAO61935.1); contains InterPro domain Tetratricopeptide-like helical; (InterPro:IPR011990); con	47.55	204	71	3	98	601	12	215	9e-44	173
MMN1.Contig_1165	GGCACACTTTAACAACAAGCACAATCACCGAGAAGAAGATGGCGTCGAGAGACCAAGTTAAGGCGTCGCACATTCTGATCAAGCATCAAGGATCTCGTAGGAAGGCGTCGTGGAAGGATCCCGAAGGAAAGATCATTATGACTACTACCAGAGAAGCAGCCGTCGAACAGCTTAGATCGATCCGCGAAGACATCGTCTCTGGCAAAGCTAACTTCGAGGATGTGGCCACTCGCGTTTCCGACTGTAGCTCCGCCAAACGCGGCGGCGATCTAGGTCCGTTTGGGCGAGGTCAGATGCAGAAACCGTTTGAGGAAGCAACATACGCACTCAGGGTTGGTGATATAAGTGATATTGTGGATACGGACAGTGGAGTCCATATCATTAAGAGAACAGCGTGAT…	744	1	AT2G18040.1	PIN1AT (parvulin 1At)	phosphorylation-specific peptidyl prolyl cis/trans isomerase (PPIase) with specificity for phosphoserine-proline bonds	Identical to Peptidyl-prolyl cis-trans isomerase 1 (PIN1) [Arabidopsis Thaliana] (GB:Q9SL42;GB:Q42334); similar to peptidyl-prolyl cis-trans isomerase PPIC-type family protein [Arabidopsis thaliana] (TAIR:AT1G26550.1); similar to parvulin-type peptidyl-p	95.8	119	5	0	39	395	1	119	3e-60	228
MMN1.Contig_1166	GGTAGGAGAGTGACGATGGAGAATAATGACAAGAGATGGTCCCTCGCCGGAAAAACCGCTCTGGTAACCGGTGGTACTCGCGGAATCGGGCGAGCGGTCGTGGAGGAGCTAGCGAGATTCGGGGCAACCGGTTCATACATGTTCAAGGAGCCAGGAGGAGCTCAAATCATGCTTGGATGATTGGAAGTCCAATGGTTTAGTGATAACCGGTTCGGTTTGCGATGCTTCGGTTAGGGATCAGAGGGAGAATTTGATCCAGGAGGTTTCGTCTGTCTTTAGCGGCAAGATTAACATCCTTGTAAACAATGTTGGAACTAATTTAAGGAAGCCAACGGTCGTCGAGTACACGAGTGAGGATTATGCTAAAATCATGTCGACCAACTTGGAATCCGCTTTCCA…	726	1	AT5G06060.1	tropinone reductase, putative / tropine dehydrogenase, putative		similar to tropinone reductase, putative / tropine dehydrogenase, putative [Arabidopsis thaliana] (TAIR:AT2G29290.1); similar to tropinone reductase, putative / tropine dehydrogenase, putative [Arabidopsis thaliana] (TAIR:AT2G29260.1); similar to tropinon	66.83	202	64	4	122	718	35	235	5e-71	218
MMN1.Contig_1167	ATTATAATAAATGTATATTATTTTAATAATAAACATTACTTATTAGTGGTGTGTTGCTCTCTCGCGCACCACAAACACAGACGAGTCGGGAATAGATAGTATAGTGGGAGGAGAGAGAGCGCGCGCCCACTATACTCTCTCTTTATGATAAATATTATATATAGAAGAGTTATATTCGCGCGCGCGCGGGACCCCGGAATAGATAGCCGCGCGGGAATAATGTCGGCTTCATATGCGGGCGGGAGGAGACGACATAAACATATATCAATTAATATCTTGTAGGCAGTCGATGTATAGNCTGTTTGTTACAATAGTTTATGATNGTAAAATCTTGTGTACTCTCTCCTCTCTTAGGGTCCTGTATGTAGCTTCGTCTTCTCTGCATAGGCTAGTTCTCGT…	1569	1	AT5G59930.1	DC1 domain-containing protein / UV-B light-insensitive protein, putative		similar to DC1 domain-containing protein / UV-B light-insensitive protein, putative [Arabidopsis thaliana] (TAIR:AT5G59940.1); similar to DC1 domain-containing protein [Arabidopsis thaliana] (TAIR:AT4G01350.1); similar to ULI3 (UV-B light insensitive 3) [	29.55	88	51	2	823	1053	246	333	3.2	30.4
MMN1.Contig_1168	GAGGGTTTTCGTCTGGTAGTGGTGTGACCGTAATAAAAAGAGAAGACGAGATCCCCTCCTCCACTAATTTGAATCAACAAGACCCAATTCTCATTATCGAATCCGATTCCGTGTTTCCTTCTTTTACCAGTTTTTTTGATCTCTTTTTCTCTTGCGGAATTTGAGTTTTGTGGAGACGATGGGAAGAGGCAAGTTCAAGGGGAAACCTACAGGCCAACGCCGATTCTCTAGTGCTGCTGAGATACTTGCTGGCACTTCTGCTGCACGTCCTCGCTCGTTCAAGCAGAAAGAAGCTGAGTACGAAGAAGATATCGAAGAGGTGTCTGAAGAGGAATCTGAAGAAGAAGAATCCGAAGATGAATCTGATGTGAAGAAGAAAGGACACGAAGCTCTAATCGA…	787	1	AT5G46020.1			similar to unknown [Populus trichocarpa] (GB:ABK93798.1); contains domain PTHR22055 (PTHR22055)	85.11	141	21	1	179	601	1	140	1e-40	163
MMN1.Contig_1169	GAACTCTTCGTATCCTCTATCTCTCAATCTGCCTTCGTGAATCTAAACAGTCTTAACAACCAACACCACCACCTCCGACACCATTATCTCAATCTCCACCTCCTCATTCACCACTTCTCTACCTGATTACTCTTTTTATTTATTTTTCTATATTCTCAGTGTTTTTTTCTTTTTCTTTTTTCAGATGCAGATCTAAAAAAGAATCTTGACAGCAGAGGAGGAGGCAGAAGAATCTTGACAGCAGAGGAGATAGAAGAAGCTTGATGGCGGAGGAGGCATAAGAAGCCTGACGGCGGAGAAGGCGTGGCGAGCATATCAGTTCGTCGGTTCAGCCGTAACACCGGTGGCCTACCACCAGCAGACTGAGTCATCGCTTAACCCATGGCATCCAGAGCAGGT…	603	1	no significant hit
MMN1.Contig_117	CAGCAGCAATATTGTTATCCAAGACTTGACGATATTAGCACCGGTCACGGTACCAAACACCGACGGGATCAACCCTGATTCTTGTACAAACACGAGGATCGAAGACTGCTACATTGTGTCCGGAGACGATTGTATCGCTGTGAAGAGTGGATGGGATCAGTACGGAATCAACTACGGCATGCCCACGAAACAGCTTCTGATCCGACGGCTCACATGCATTTCCCCCGACAGTGCCGTGATCGCTTTAGGCAGCGAGATGTCCGGTGGAATAGAGGATGTTCGAGCTGAAGATATCATCGCCATCAACTCAGAATCAGGAATAAGGATCAAAACAGCTATTGGTCGAGGAGGGTACGTGAAGGATGTGTACGTAAGAGGCATGACGATGCAGACGATGAA…	884	2	AT4G23500.1	glycoside hydrolase family 28 protein / polygalacturonase (pectinase) family protein		similar to glycoside hydrolase family 28 protein / polygalacturonase (pectinase) family protein [Arabidopsis thaliana] (TAIR:AT3G61490.1); similar to glycoside hydrolase family 28 protein / polygalacturonase (pectinase) family protein [Arabidopsis thalian	95.31	256	12	0	2	769	235	490	3e-144	507
MMN1.Contig_1170	GAGATTGTCTTCAACCCTTCAGCAACTGTTGGTGAACTCAGTGAACCAATGTGGCCTGTTGAGGCAAGAAACGCTGCGATAGCAAACAGTTACTTTGTGGGGTCCATTAACAGAGTTGGAACCGAAGTGTTCCCAAATGCTTTCACCTCAGGGGATGGGAAACCGCAGCACAATGACTTTGGTCATTTTTATGGATCAAGCTATTTCTCGTCACCGGATGCTTCTTGCACGCCGTCTCTGTCGCGTTGCAGAGATGGGTTAATGATCTCGGACATGGATCTCAATCTCTGCCGGCAGTACAAAGATAAGTGGGGATTTAGAATGACTGCAAGATACGAAGTCTATGCGGATCTTTTGGGTGAGTACATAAAGCCAGACTTCAAGCCTCGAGTTGTTTCT…	556	1	AT5G64370.1	BETA-UP (BETA-UREIDOPROPIONASE); beta-ureidopropionase	PYD3 encodes a beta-ureidopropionase which, when expressed in E. coli, has been shown to convert beta-ureidopropionate into beta-alanine.	similar to NLP1 (NITRILASE-LIKE PROTEIN 1), hydrolase, acting on carbon-nitrogen (but not peptide) bonds [Arabidopsis thaliana] (TAIR:AT2G27450.2); similar to NLP1 (NITRILASE-LIKE PROTEIN 1), hydrolase, acting on carbon-nitrogen (but not peptide) bonds [A	91.55	142	12	0	1	426	267	408	9e-68	252
MMN1.Contig_1171	GAAAGAAGCAGAGAGAAAGTGGGGGAAAGACGTGGGAGTGGTGGTGGTGGTGAGAAGTTTCTGGATAATAAAATCATGGAGTGATGGGAGACGTTCTGAAATCTCCACGCCTTCCTCCTCCTCCTATGGAAAGTCAGAGACTGATCCCGTCTCTTGTCTTCGTCCCAGTACTACGGCCGGCACAAGAATTTCTCACCTGAGCTTCCTCCTTTACGTGCCAGGTGCGTCTTGGAGAGTCATTGTAGTCTGTGCGAGTTGTCAGGTCCTGCGACACCGAGCGCGCTCCTCGCGTGGCTGTCAGTGGGGGTAATCGCAGTTGGTTTTTGTATTGTTCTTAACAACGTAGCAGTGCGTGGGAGTATGGGCGTTTTCTTGTGGTTTTTCCTTGTCTTGTTAAGC…	714	1	AT5G40250.1	zinc finger (C3HC4-type RING finger) family protein		Identical to RING-H2 finger protein ATL5I (ATL5I) [Arabidopsis Thaliana] (GB:Q9FL07); similar to zinc finger (C3HC4-type RING finger) family protein [Arabidopsis thaliana] (TAIR:AT1G23980.1); similar to hypothetical protein [Vitis vinifera] (GB:CAN80445.1	36.11	36	23	0	90	197	24	59	1.1	30.4
MMN1.Contig_1172	GATCATCACAAACATCCTCATATTTTCTTATGATAATATAGTATTGTACATGGTAGTGAATAGTTTCTCGTTCATCATCCTTGGTGGACTCTTTCTCAGCAGGCCACCCCTCTCAGAGAGCCGCAACGCCATAAGATAATTCTGGGTAATGGAACTCAAAGTTTCTCCATCCTGTCACTGGCTACCCACGTAAGTCAGAAGTCATCTCTGAATACTTCTTCTACTCCGGCTTATGCACTCCACTAAACACTTCGTACCCAAAAGGTGTAGCCGCTAATAGTGCAAACCTCATGACTTTTCCAGGACTTAACACGAGGGGAATCTCCATGTACAACTTTGCAGTCTCCCCAGGAGTATCTAACCCGCCTCACTCCCACCCTGGTGGTGACCGAGGCAGGG…	789	1	AT1G74820.1	cupin family protein		Identical to Germin-like protein subfamily T member 3 precursor [Arabidopsis Thaliana] (GB:Q9S772;GB:Q1PFD3); similar to germin-like protein, putative [Arabidopsis thaliana] (TAIR:AT1G18980.1); similar to germin-like protein [Ananas comosus] (GB:AAM28275.	53.44	131	59	2	177	563	55	182	9e-26	114
MMN1.Contig_1173	GAGATCTTTTCGCATCAAGCTCGGAAGGGAAAATGGGGCTTTCATTTGGAAAGCTTTTCAGCAAGCTGTTTGCGAAGAAGGAGATGCGTATCCTTATGGTTGGTCTTGATGCTGCTGGTAAGACCACCATTCTTTACAAGCTCGAGCTTGGTGAGATCGTTACCACCATCCCCACCATTGGGTTTAATGTGGAAACAGTTGAATACAAAAACATCAGCTTCACTGTGTGGGATGTCGGGGGTCAAGACAAGATCCGTCCCTTGTGGAGGCACTACTTCCAGAACACTCAAGGTCTGATCTTCGTGGTCGATAGCAATGACAGAGATCGTGTTGTTGAAGCAAGAGATGAACTTCACAGGATGTTAAACGAGGATGAGCTTCGTGATGCAGTACTTCTTG…	775	1	AT3G62290.1	ATARFA1E (ADP-RIBOSYLATION FACTOR A1E); GTP binding / phospholipase activator/ protein binding	A member of ARF GTPase family. A thaliana has 21 members of this family, known to be essential for vesicle coating and uncoating and functions in GTP-binding. The gene is shown to play a role in cell division, cell expansion and cellulose production using	Identical to ADP-ribosylation factor 1 (ARF1) [Arabidopsis Thaliana] (GB:P36397;GB:Q7G9L3); similar to ARF1A1c (ADP-RIBOSYLATION FACTOR 1), GTP binding / phospholipase activator/ protein binding [Arabidopsis thaliana] (TAIR:AT2G47170.1); similar to ADP-ri	98.18	165	3	0	33	527	1	165	2e-95	329
MMN1.Contig_1174	CAGAGACAAGTGTAAATTTGCAATTGGTAATATCGTAACGCACTCACTGTAGTGCGTGTGTTAGTTATCGCGCGACAANCGAAACACGCACNGAGACCCCGCATGCGAGTGTCTGTGGAGACGCGAGAGAGAACGCGCCGCCCTATATATCTCTCTCATATATGAGATCATACTATATATCAGAGATGTGTATACTACGTGCGCAGCGCGCGCCGCGCGAGTACTATAGTCGCCGGCGAGGAATATCTGCGTGCACTATTACGCGGCGCGCGGAGAGTCAGACGAGCATCATTCGATAACAGAACGATATACACGCCGTGGCGGAGGTGCACAGAACGATATCCAGGCTAGCAGCACTTTCTAGATCTACATGATCAGTTCACACCACTGAGTCCAGTA…	1665	1	no significant hit
MMN1.Contig_1175	GAGTCTTAACTTAAAACTCAAAATTTAGTTATCTTCAATTAAGGTTGATATTTATTCTTTTCTTTAATCTTTTTTTCTTTTCTCTCCGTCGACAGATTCATTCTCCATTTTTCTTCTTTTCATCCTCTTTCACTCTCATCTCTTCCATCTCTGTACTCTAGAAAACTCACCAGCAGGGGTGGAACGTATGTTGTGATCAACGGGTCACGTGTCCCCAACTAAAAATATACTTTTTTTAGTGACCATCTTAGTATTAGCTTGAATTCAATGAAAGTGCCCCCAGTTAATTCAAAATTTATGTCAAATCCCCCTACTAAATGCTTTCCTATATCCGCCCCTGCTCACCAACTCTCTCAGGTCTCACTTTTCAGATGTAATCAACTGAGAAATGATGAAGAT…	726	1	AT1G05800.1	lipase class 3 family protein		similar to lipase class 3 family protein [Arabidopsis thaliana] (TAIR:AT2G31690.1); similar to unnamed protein product [Vitis vinifera] (GB:CAO45320.1); contains InterPro domain Lipase, class 3; (InterPro:IPR002921)	43.59	39	22	1	241	357	29	66	4.4	28.5
MMN1.Contig_1176	GAGAGAAAATAATATTCTCGTTCTCCATCTGCTTTCTCTCATCGGAGCTCTCTTTTTCTGGTTCTCAAGGAACCAAAGGACAAGATTCTGAGCTTGGTGGAGGAGGAGCCTAAAGATGGAAGGAGATGTGTTCTCAGGGTTTGGTGAGAGACACAACATGGATGGCAAACTGCTGCAGAGTTTCCAGAAGAGCTTTGTGGATGTTCAAGACATTTTAGACCAGAACCGGCTGCTGATCAACGAGATCAATCAGAACCACGAGTCCAAACAGCCTGATAACTTGGGTCGAAACGTCGGTCTGATCAAAGAGCTCAACAACAATATCAGAAGAGTGGCTAGCCTTTACGGCGACCTCTCTCATTCTTTTGCAAGATCGATGGATGCTTCATCAGAAGGTGA…	685	1	no significant hit
MMN1.Contig_1177	GGTGCCATTGATGCAAAATACGATGTTGCCGTATCAACTGCTTGCGGTGGCCTTGATTACATTGTTGTGGAAACAACTTCTGCCGCTCAGGCATGTGTCGAGCTGCTGCGGAAGGGAAATCTTGGCGTTGCAACGTTTATGATATTGGAGAAACAAACCAATCATTTACAAAGATTGAAGGAGAGAGTGAAGACACCCGAGGATGTTCCACGCCTCTTTGATCTGATTAGAGTTAAGGATGAGAAGATGAAACTCGCATTCTACGCATCCTTGGGAAACACTGTTGTGGCAAAAGATCTTGATCAGGCAACACGTATTGCGTATGGTGGGAACAGAGAATTTCAAAGAGTCGTGACTCTTGACGGTGCTCTCTTTGAAAAATCTGGCACCATGAGTGGA…	686	1	AT5G48600.1	ATSMC3 (ARABIDOPSIS THALIANA STRUCTURAL MAINTENANCE OF CHROMOSOME 3); ATP binding	member of SMC subfamily	Identical to Structural maintenance of chromosomes protein 4 (SMC4) [Arabidopsis Thaliana] (GB:Q9FJL0); similar to TTN8 (TITAN8), ATP binding [Arabidopsis thaliana] (TAIR:AT3G54670.1); similar to SMC4 protein [Oryza sativa] (GB:CAD32690.1); similar to pu	90.35	228	22	0	1	684	565	792	1e-100	362
MMN1.Contig_1178	GACATCAATAGTATGTTATCTATCTTTTAAACTTTGGAGAAAGGATGAAGATGTTACCAGAAGCATGCGTGGCGAACATCCTCTCCTTCACAACTCCTGCAGATACGTTCTCGTCGGCGTCTGTCTCCTCAGTTTTCAGACTTGCGGGAGAGTCTGACTTCGTGTGGGAAAAGTTTCTACCCTCTGGTTACAGCCGCCTCATCTCTACATGGACGCATGGGAGTTTCTCCTCCAAAAAGGAGCTCTATCGATGTCTCTGTGAATCAATTCTCATCGAAAATGGCAGAAAGATATTCAAGATTGATAAGCTATCTGGGAAGATAACGTATGTTCTGTCGGCTAGATATCTTTCCATAACTTGGAGCGATCAACGACATTACTGGTCTTGGATCCATCGAT…	786	1	AT1G09155.1	ATPP2-B15 (Phloem protein 2-B15); carbohydrate binding		Identical to F-box protein PP2-B15 (PP2B15) [Arabidopsis Thaliana] (GB:O80494;GB:Q8LBR0); similar to ATPP2-B13 (Phloem protein 2-B13), carbohydrate binding [Arabidopsis thaliana] (TAIR:AT1G56240.1); similar to unnamed protein product [Vitis vinifera] (GB	80.88	136	24	1	51	452	2	137	2e-62	220
MMN1.Contig_1179	CGGAGAGTTTAATCTCTTGCTAAGCGATTGGTGGCATGAGAGCGTTCTCTCCCAGGAACTCGGTCTTTCTGCCAAACCTATGCGCTGGATCGGTGAAGCTCAGAGCATATTGATCAATGGGAGAGGACAATTTAATTGTTCATTGGCGGCGCAATTCAGCAACGCGACGGCACAGTTCAGCAATACGTCGCTACCTATGTGCAAGTTTAAAAAAGGAGATCAATGCGCACCACAGAGACTACACGTGGAGCCTAACAAGACTTACCAAATCAGACTCGCCAGCACCACCGGTCTTGCCTCCCTCAACTTTGCTGTTCAGGGACACAAGCTAGTGGTGGTGGAGGCTGACGGCAACTACATCACACCGTTCGCCACCAGCGATGTCGATATATATTTCGG…	809	1	AT5G21105.1	L-ascorbate oxidase/ copper ion binding		similar to L-ascorbate oxidase, putative [Arabidopsis thaliana] (TAIR:AT5G21100.1); similar to ascorbate oxidase [Brassica juncea] (GB:AAF20933.1); similar to ascorbate oxidase [Brassica juncea] (GB:AAF20931.1); similar to ascorbate oxidase [Brassica junc	77.86	262	57	2	2	784	169	424	1e-109	392
MMN1.Contig_118	GATTTTTCAATAGRCGTCTCYTCTCCTCTTTCTCCTWCRCAGCAAAATCTTCTCATCGAATCAGATCAGCCATGGAGGAYGAGATTGAGCTGAAAACTGCCCCTGCTGATTTCCGGTTCCCTACAACGAACCAGACAAGGCACTGTTTCACCCGTTACATTGAGTTCCACAGGTGCACAACTGCAAAGGGTGAGGACTCCAATGACTGCGAGAGGTTCGCCAAGTACTACCGCGCTCTCTGCCCTGGAGAATGGGTTGACAAGTGGAATGAGCAGAGGGAGACTGGAACTTTCCCTGGTCCTCTCTGATTCAAGCAAGAAGYCTCTCTTTTTATCATTTTATGCTTAAGGCCAGAAGAAGGTCGTGTGGATTGATTATTGACACCCAACTCTATCTTCC…	446	2	AT5G57815.1	cytochrome c oxidase subunit 6b, putative		similar to cytochrome c oxidase subunit 6b, putative [Arabidopsis thaliana] (TAIR:AT4G28060.1); similar to unknown [Populus trichocarpa] (GB:ABK93801.1); contains InterPro domain Cytochrome c oxidase, subunit VIb; (InterPro:IPR003213)	97.44	78	2	0	72	305	1	78	4e-44	173
MMN1.Contig_1180	TCTATTATTATCTTATTATTCTATCATAAATTACACTAATACATCTCTATATTAGTATGAGCTGTGTTCATCGTTCCTCTGCAGCCACACTACACACTAATCAGCACACCAGACAGTCGCGAGGCTAGATGCTCGTTAGTAGGANGAGAGAAGAGAGAGCGCGCGCACCATATCATATATCTCCTCTAAGTATGATACTATCACTATTATATACACAGATGATTTATACTCACTCCNCAGAGCGCCNCCGCACGATGAATGTTACTCGCGCGCGAGATCATATTGCAGTGTATATCTCGCTGCGCGCGGTGGTGTACGACAAACCACATACGATGCAATAGTAGCACCACGTGGTAGCACAGATGGAGAGTAAGAAGTCTACAAACAGAATCAGATCTA…	1416	1	AT2G01970.1	endomembrane protein 70, putative		similar to endomembrane protein 70, putative [Arabidopsis thaliana] (TAIR:AT1G14670.1); similar to unknown protein [Arabidopsis thaliana] (TAIR:AT5G37310.1); similar to Putative endosomal protein [Oryza sativa (japonica cultivar-group)] (GB:AAK52585.1); s	27.94	68	49	2	947	1150	529	589	3.7	30
MMN1.Contig_1181	GGAGAATCAATTGAAAGAAAAAAATAAAGCTCATCAAACCCTTATTTTCAATCTTATTCAGAGTAGATTGTTATTGATTGATTCATCTTGTGTGGCGAAAGAGATAGAGAGAGATGGATTGGGATAGCGTAGCTGCAGGGGATGTGATAGAGGCGCTAAGAGAGGTTGAGTGGTCGACGAGTCCTCGTTCTTTAGCAGAGTTCTTCTCCAGATTCGCCCTCCCTCGCTCTTTCTCTAAATGGATGAGCCGCCTCAAATGCAATCTTTACTACTATAGGACGAACTACTTCATCCTCTTGATTTTCGTTATGGGTCTTCCACTTATCACCCGACCTCTTGCCATTATTGGTGCTGCTCTTACTGCTTTAAGCTTAGCTTTCCTTAACGACAGCTTTGCAG…	788	1	AT3G11397.1	prenylated rab acceptor (PRA1) family protein		similar to prenylated rab acceptor (PRA1) family protein [Arabidopsis thaliana] (TAIR:AT5G05987.1); similar to hypothetical protein [Vitis vinifera] (GB:CAN72272.1); contains InterPro domain Prenylated rab acceptor PRA1 (InterPro:IPR004895)	92.23	206	16	0	114	731	1	206	1e-108	389
MMN1.Contig_1182	GGTATGAGAAGTTACTAACGAAAAGTGAATCCTTTGGGATGTTAACGGAGCAAACGCAGGAGGAAAGGAACCCTTTCGGTTTAGGAGAAGGTCGGCATCGGACGCGTTCGATAAGGCAGCAGGATCAGAGAATGGACCAAGGAAATCTCCTCCTACTTACGGCGTGTGATCTCTAATCTCCTAACCCCAAATCTCTAAAGAGAGAGAGAGAGAAGAAGAAAGAACAGAGTAGCCCCCGAGACGCTTTCGTTTTGACACATCAAGTGGTCCTTCCATGCAGAGTTCGTGTTTCTTCCTTTGGTAGGACATAGAGGTTCTCTTTTGTTTATGTGTGTATCAGTCAGTGTATTGAGTTTGTTTGCGTGTATGTGATTACGTGTATCTTCTCTTTTTTGTATT…	470	1	AT1G56220.3	dormancy/auxin associated family protein		similar to dormancy/auxin associated protein-related [Arabidopsis thaliana] (TAIR:AT1G54070.1); similar to unnamed protein product [Vitis vinifera] (GB:CAO17488.1); contains InterPro domain Dormancyauxin associated (InterPro:IPR008406)	85	40	5	1	50	166	101	140	6e-05	43.5
MMN1.Contig_1183	GATCGAAGACGAAAAAAAAAAAGCTGAATCTTCGTGATGACATCTCTTTTAATGAGAACCGGTTCGATGCCGGTTCAAACCGGGTTTATCCCATCGCGGAAGGCGTCGACGACAATCTCCCGGCACAACTCCGTCGAATCATTACCCAGCCACGGCGGCGAGAGATTCCCCGGCGGAAAGATCTCGATCGACGTCAAGGCTACGTCCGGGCTGCGGAGGGTGTTATCGGAGAGCGATGTGATTAGATCCGAGAGAATGTCGAAGAGCGTCGCATCGAAGCCTTCTCCGGCGAATATTCCGGAGGAGGAGGATGAAATTAGGTTCTCCGACGGCTGGGGATCGCTGATCTGGAAGGAGAGCGGTGTTCCCGCGGAGGAGCAAGGAGTTTCCGGTGGCGGT…	753	1	AT4G17940.1	binding		similar to binding [Arabidopsis thaliana] (TAIR:AT5G20190.1); similar to unnamed protein product [Vitis vinifera] (GB:CAO63389.1); contains InterPro domain Tetratricopeptide-like helical; (InterPro:IPR011990); contains InterPro domain Tetratricopeptide re	72	250	59	5	37	753	1	247	6e-85	310
MMN1.Contig_1184	ACTGCTGAGTTCTCTGGTTTCCTTCTCTACAAGGAGCTTGGTAGAAGACTCAAGAAAACAAACCCTGTTGTTGCTGAGATCTTCTCTCTTATGTCCAGAGATGAAGCAAGACATGCCGGGTTCTTGAACAAAGGTTTGTCTGATTTCAACTTGGCTCTTGACTTGGGTTTCTTAACAAAGGCAAGGAAATACACTTTCTTCAAACCCAAGTTCATCTTCTACGCCACTTACTTGTCCGAGAAAATCGGGTACTGGAGATACATCACAATCTACAGACACCTCAAGCAAAACCCTGAGTTCCAGTGTTACCCAATCTTCAAGTACTTTGAGAACTGGTGCCAAGACGAGAACCGTCATGGAGATTTCTTCTCTGCTTTGATGAAAGCTCAGCCTCAGTTC…	725	1	AT3G56940.1	AT103 (DICARBOXYLATE DIIRON 1)	Encodes a putative ZIP protein with varying mRNA accumulation in leaves, stems and roots. Has a consensus carboxylate-bridged di-iron binding site.	Identical to Magnesium-protoporphyrin IX monomethyl ester [oxidative] cyclase, chloroplast precursor (CRD1) [Arabidopsis Thaliana] (GB:Q9M591;GB:O04051;GB:Q38892;GB:Q8GUS3;GB:Q9M1K4); similar to unknown [Populus trichocarpa x Populus deltoides] (GB:ABK96	94.58	240	13	0	1	720	141	380	4e-135	477
MMN1.Contig_1185	GACACAACAGAGAACCAATAAAATCCATTTGTGGAAAGAAAGAAAACAAAGAAACTAGTTATGGCGAAGGACTTGGAAGCCGTTTCCGGAGAAGGTTTTCATACAATATACTATCATGATCCACCGCCAGCGCCTCTGTTTGATCCTGCGGAGCTGACCTTGTGGTCTTTCGTCTAAGTTGTTCTCACTTATTTTTTAGCTACTCTCCTCTTCCTCTGTTCTTCCTGTTTTACTGTCTCTGTAACGTAGATTCTATAGGGATTGTAATGTCTTTTCTTTTTGCATTGTTTTGTCTGGCTTTTGATGTGCGGTTGTGTTGCTGTTGTGCGTGTTTTTTGTGGTGCTTTGTTCGTTTTTACTTTAATTCCTATGTTGATAACTTTAATTTGTCCTGGTTTA…	823	1	AT3G53420.2	PIP2A (PLASMA MEMBRANE INTRINSIC PROTEIN 2A)	a member of the plasma membrane intrinsic protein subfamily PIP2. localizes to the plasma membrane and exhibits water transport activity in Xenopus oocyte. expressed specifically in the vascular bundles and protein level increases slightly during leaf dev	Identical to Aquaporin PIP2-1 (PIP2-1) [Arabidopsis Thaliana] (GB:P43286); similar to PIP2B (plasma membrane intrinsic protein 2,2), water channel [Arabidopsis thaliana] (TAIR:AT2G37170.1); similar to plasma membrane intrinsic protein 1 [Brassica napus]	61.02	59	23	0	61	237	1	59	7e-13	71.2
MMN1.Contig_1186	GGGTGCGATCATACCAGCACTAATGCACCGGATCCCATCAGAACTCCGCAGTTAAGCGTGCTAAGGACGAGAGATATCTGTCTGTCATTATAGTATGGTAATAATTTGTCAATTCATGTAATAATGAACTCTTGCATTCTTCTTTTTCAAAAAAAAAAAAACTCTTGCAC	170	1	AT4G26090.1	RPS2 (RESISTANT TO P. SYRINGAE 2)	Encodes a plasma membrane protein with leucine-rich repeat, leucine zipper, and P loop domains that confers resistance to Pseudomonas syringae infection by interacting with the avirulence gene avrRpt2. RPS2 protein interacts directly with plasma membran	Identical to Disease resistance protein RPS2 (RPS2) [Arabidopsis Thaliana] (GB:Q8LKZ8;GB:Q8LKZ9;GB:Q8LL00;GB:Q8LL01;GB:Q9ASP5); similar to disease resistance protein (CC-NBS-LRR class), putative [Arabidopsis thaliana] (TAIR:AT1G12280.1); similar to RFL1	45.83	24	13	0	7	78	814	837	2.9	26.9
MMN1.Contig_1187	GAGTCTTGCATCGTTTTGCATTTCCCGAAAATTCCCTGTTGGTGGATCAGATTCCAATCAATTTTGTATAAAATTTTAATGGAATAAAATTTTTTCTTTATTAATGACTATTAGAAGACGAAAAAAAAAAAAA	133	1	no significant hit
MMN1.Contig_1188	GAGACACAGTCGTCGAAGAGAAAGGTTGAAGCGAAGAAGAAGAAGAAGAAGAAGAAGAAGAAGATGGGTGGAGGAATGGAGACGAACAAGAACAAGTTCATCGAGGATTGGGGATCCGCGAGAGAGAATCTCGAGCATAACTTCCGCTGGACGCGTCGCAACTTCGCTCTCATCGGAATCTTCGGCATCGCCCTCCCAATCATCGTCTACAAGGGCATCGTCAAAGATTTCCATATGCAAGACGAAGATGCAGGCAGACCACATAGAAAGTTCCTCTGAGAACAACATTCTCTTCTGCAACATGTCTCAGCAGTTTGGAATTTTCAAGAAGCTGATGCTAGAACTCTCCTTTCTTTCTTTCTTTTTGCATTTTATTCAGAATAAAAGAACAACATCTGA…	464	1	AT2G31490.1			similar to unknown [Populus trichocarpa] (GB:ABK96039.1)	100	71	0	0	64	276	1	71	4e-38	153
MMN1.Contig_1189	GGAAGTTTGGATCTTTGATAGAGAGAAAATTAGAATCACAAAGGAAGGAGAAGACGAAGAAGAAGATGTCGTTGGTGTGGCTAGAAGCAGCTCTGCCTCTGGGGATCATCGGAGGGATGCTCTGCATCATGGGAAACTCTCAGTACTACATCCACAAAGCTTATCATGGCCGTCCGAGGCACATAGGCCACGATGAATGGGATGTGGCTATGGAGAGACGCGACAAGAAAGTCGTCGAGAAAGCCACAACTCCTTCCTCATGATCTGATCCCTCAGGGGGTTAAGGTGAACACTTATGGGCACACAATTAAAGTGTATTCCAGAAGAAGAAGAAGAAGCTGAAGAGTCTCATACTGTTATTCCCGTTTGATTTCTTTTTTTTTTCCTGCTTTCAGAATT…	501	1	AT3G08610.1			similar to unnamed protein product [Vitis vinifera] (GB:CAO64059.1); similar to hypothetical protein MtrDRAFT_AC136139g5v2 [Medicago truncatula] (GB:ABE93033.1)	96.67	60	2	0	66	245	1	60	2e-21	98.6
MMN1.Contig_119	GACAGACGCATCTTTGAACATTGTRACCCTCTCTCAAATCTCAGTTTCAATCTCTCTCCATAACCGATAATGGCTCCCAAGGCGGCAGAGAAGAAACCGGCAGAGAAGAARCCAGCSGAGAAATCMCCGGCSGAGAAGCGACCAAAGGCGGAGAAGAAGATCTCGAAGGAAGGCGGAAGCGAGAAGAAGAAGAAGAAATCGAAGAAGAGCATCGAGACATACAAGATCTACATCTTCAAGGTCCTCAAGCAGGTTCATCCCGACATCGGAATCTCCGGAAAAGCGATGGGGATCATGAACAGTTTCATCAACGACATCTTCGAGAAACTCGCCCAGGAATCTTCGAAGCTCGCTAGGTACAACAAGAAGCCGWCGATCACGTCTMGGGAGATCCAGACG…	633	2	AT2G37470.1	histone H2B, putative		Identical to Histone H2B.4 [Arabidopsis Thaliana] (GB:Q9ZUS0); similar to histone H2B, putative [Arabidopsis thaliana] (TAIR:AT3G53650.1); similar to histone H2B-like protein [Solanum tuberosum] (GB:ABB72812.1); contains InterPro domain Histone-fold; (In	97.73	88	2	0	217	480	51	138	7e-43	170
MMN1.Contig_1190	GGCCCCGACTCGTAGTACCCCCCTTTTGCCTTCGTCTCTCTCTCTCTCTCTCTCGATTTTATTTTTTCTTCTTCTTCTTCTTCTTCTTCTTCTTCTTCTTCGCTGGATCGAAAAAACAAACAAGGGCGTGCTTTCGATTCGTGTCTCGCACTCTACGGGGGTTTCTTCTTCTTCTCGCTGTTGGATCTTCGCGGGTTGATTGGATCAGGGAAAAAAATGAGAGACGGCTATGCATGGGAGGAAGAAAGGTCATCGTCGTCTGCTTATGCTTAGACCTCCTTCGCGTCTAATCTCAACCGCTTCTTCTTCTTCTTCGTCGCTCTCTCTTTCTTCACCTTCTTCCTTCTCTAAGTGCAGGACGGGAGGAGGATTAGTGTTGGTGACTGTGCTGTTCAAGCC…	745	1	AT3G48050.2	bromo-adjacent homology (BAH) domain-containing protein		similar to bromo-adjacent homology (BAH) domain-containing protein [Arabidopsis thaliana] (TAIR:AT3G48060.1); similar to hypothetical protein [Vitis vinifera] (GB:CAN60153.1); similar to BAH domain-containing protein, putative [Lycopersicon esculentum] (G	80.51	118	23	1	389	742	58	173	5e-48	182
MMN1.Contig_1191	CGAAGGGAAAACCATCGGTCTTCTCTTCTCGGTGGCATCTTACAGGCAATGTAAGGAGTTTACTTCCAAGCTTGAAGAGGTCTATAAGAAGCTGAAGGAGAATAACGAGGATTTTGAGATTGTGCTCATATCTCTTGAAGATGATGAGGAGGCTTTTAAGCAGGACTTTGAGACCAACCCATGGCTGGCGTTGCCGTTCAATGACAAGAGCTCGTCGAAGTTGACTAGGCACTTCATGCTGTCAACGTTACCGACCTTGGTCATTCTCGGACCCGATGGAAAGACCCGCCACTCGAATGTTGCTGAAGCTATTGATGACTATGGAGTTGTTGCATATCCTTTCACTCCGGAGAAGTTTGAAGAACTCAAGGCGATAGAGAAGGCAAAGCTAGAGGCTCA…	711	1	AT1G60420.1	DC1 domain-containing protein		similar to electron carrier [Arabidopsis thaliana] (TAIR:AT4G31240.1); similar to electron carrier [Arabidopsis thaliana] (TAIR:AT4G31240.2); similar to unnamed protein product [Vitis vinifera] (GB:CAO66081.1); similar to unnamed protein product [Vitis vi	77.59	58	13	0	538	711	381	438	5e-103	91.3
MMN1.Contig_1192	GGGCGAACTTTGACTGATATTCTTTTAACTAAAAAAGAAATAGAAAATGCATGAAAAAATCTGCACTACAATCACCATCTCATGTGTTTTTTCCTACAGTAGCTGTGCTTATTAGTGTCCTTTTCCTTTTTTTTATCGCTGGTTATCGCTTTCTAGTATTTATTATTCCACATTGTTTCTTTATATGTATGTTCTTAGTTTGTATTTTTATTCTTTAACATGTAACTCTCCGTGTTTTTGTTTATCTGTTTTTGCTTGTACTTGGTGTTACTCTTGTTGTGTGATTCTATTTACTGTTGATTCTCTTTGTATTTTCGTTTGTTTTATTTGTTGTTAGTTTTGTCTTTCTGTTAGTCTTTTTTAATTTGCTTGTTTGTGTTTTCTTTTGTCTTTTTTTTT…	808	1	AT1G62430.1	ATCDS1 (CDP-diacylglycerol synthase 1); phosphatidate cytidylyltransferase	Encodes a CDP-diacylglycerol synthase, involved in phospholipid biosynthesis.	Identical to Phosphatidate cytidylyltransferase (CDS1) [Arabidopsis Thaliana] (GB:O04928;GB:O48808); similar to phosphatidate cytidylyltransferase, putative / CDP-diglyceride synthetase, putative [Arabidopsis thaliana] (TAIR:AT4G22340.3); similar to phos	21.43	56	44	0	128	295	138	193	5.1	28.5
MMN1.Contig_1193	AGACGAGGAGGATGTGGTTTTGCTTAGTTTCTCCGCCTCAGTGCGTGTTGTCGTCGATTCATCTTGCGCTCCTCTCCTGTGTGAGTCTTGGGCTTCGCCGTAGTGCGGCGAGTCGCGGAATTTGCTCCTCTGCTGTCGTAGCTCTCCAGGAGGATGGTTGTACCGAATACTCTCCGTCCTCGTCTACGCCTCTCTGCTCTTGGTTTATTACTGCTCTATGTTGAACACATGGACTGCCTGTGCCTTCTTCTCTTCGGGCACTGCGGTCAGTGAAGATGTAGCTTTCCTTGGTGTCTGTTCTGTCTTTGTTTGTGATGTTGTTGGTTTTTTTTTTATGTTGTCGGGTGGTGTTGTGTCATTTTGTGTCCTCTTTACGTGTTGCGCATCTTGACCTGTGTG…	781	1	AT5G18450.1	AP2 domain-containing transcription factor, putative	encodes a member of the DREB subfamily A-2 of ERF/AP2 transcription factor family. The protein contains one AP2 domain. There are eight members in this subfamily including DREB2A AND DREB2B that are involved in response to drought.	Identical to Dehydration-responsive element-binding protein 2G (DREB2G) [Arabidopsis Thaliana] (GB:P61827;GB:Q147L9;GB:Q6J9S2); similar to DNA binding / transcription factor [Arabidopsis thaliana] (TAIR:AT1G75490.1); similar to hypothetical protein [Viti	36.54	52	30	2	63	209	120	170	4.8	28.5
MMN1.Contig_1194	GGAGTCGACCCACTTTCTGTTGCATCCTTCAAAACTTAATTCATTAGCAAAAAGGAATGGCTACAGCAGCGGCGCCGGCGGTGGTTGCATGGACAAGAACGGGAACTGCGTTCAAGTCCGGACAGGCACAGATGAAATCGGAGATGAAAGCTTCTTACGTAAGAGGACTAAATTCTTACGGTGGTCTCAAGGCACAGAACAACAAGGTTGTCTCTATGGGATTACCAGTCTGCACCGAACAGTGCTTTGCAAACGTCGTGATGTCTCTCAAAGGACGCACAAGTCGTGGAGGAGCATTGACCTCGACCTGTAACGCGGTCGGAGAGATTTTCAAGATTGCAGCAATCATGAACGCTCTTACTCTCGTTGGCGTTGCGGTTGGATTCGTTCTCCTTCGAA…	569	1	AT2G26500.1	cytochrome b6f complex subunit (petM), putative		similar to unnamed protein product [Vitis vinifera] (GB:CAO61267.1); contains InterPro domain PetM of cytochrome b6f complex subunit 7; (InterPro:IPR012595)	84.82	112	17	0	90	425	12	123	7e-49	189
MMN1.Contig_1195	TGAGCCAAAACCAAAACCTGAGAATTGGAAAATCAAAATGCTTTACGATGGGGATTGCCCTCTCTGTATGCGTGAGGTTAATATGCTTAAGGAAAGGAATGAGGAATATGGAACGATAAAGTTCGTCGACATCAGTTCCAATGATTATTCCCCGCAAGAGAATCAAGGGCTTAATTACAAAACTGTTATGGGGCAAATCCACGCGATTCAGTCCGATGGAAATGTGGTAACGGGTGTGGAGGCATTTAGGAAACTATATGAACTGGTTGGGCTTGGATGGGTTTACTCTATCACTAAATTTGAACCAATAGGGAAGGTAGCTGATGCAGTGTATGATTCCTGGGCTAAGTATCGACTTCAGGTCACAGGGCGGCCACCTATAGAAGCTATTCTTGAAGC…	434	1	AT5G50100.1			similar to PBng143 [Vigna radiata] (GB:BAB82450.1); contains InterPro domain Thioredoxin-like fold (InterPro:IPR012336); contains InterPro domain Putative thiol-disulphide oxidoreductase DCC (InterPro:IPR007263)	87.88	132	16	0	8	403	67	198	2e-66	247
MMN1.Contig_1196	TCAGCGGGCTGCCGGCGAACACGTCGACGGAGAGGCTCGACATACTGGACGACGAGAGGAGGGTGACGGGGTTCAGCATCATCGGGGGAGAGCACAGGCTGACGAACTACAAGTCGGTGACGACGGTGCACAGGTTCGAGAAGGAGAGGCGGATCTGGACGGTGGTGCTCGAGTCGTACGTCGTGGATATGCCGGAAGGGAACTCGGAGGACGATACGCGCATGTTCGCGGATACGGTGGTTAAGCTTAATCTGCAGAAGCTGGCGACTGTCACTGAGGCTATGGCTCGTAACGCCGGCGACGGAAGCGGTGCTCAGGTGACCTGATTAGAAAAAAAAAAACCAAAAAAGTTATAAATATATGGGAAAATGGATTTGTTTTTTCTTTTTCTTTTCTAAA…	515	1	AT4G17870.1			similar to unknown protein [Arabidopsis thaliana] (TAIR:AT5G46790.1); similar to Streptomyces cyclase/dehydrase family protein [Brassica oleracea] (GB:ABD65175.1); contains InterPro domain Streptomyces cyclase/dehydrase (InterPro:IPR005031)	96.26	107	4	0	3	323	85	191	4e-54	207
MMN1.Contig_1197	GGTTACGGTTGAGAGAACCCCTTTTTGAAAATGGAGAAATCGACCTCCACCGCAACTCCTCCTCCTCTTCCGCTTCCTACAGGAGCTGCGGCAGATCAGAGATCTTCGCCGGCGATGGACTTAGATAACCCGCCGGTTCCGAGTCGGCTACATGTAGGAGGAGCTCAGGTGGCTCCGTCAGATCCGTCGGCAAGGGGGAGAAAGAGGGGGCTGGAAGGGAATCTGAAGGTGGAGAACTCCAACTACTACAAGATGCGTCTCCTTGTCAAAGATCTTCGCCCTCACGTTCTCGAGGTACTACGAGCTCCCGACTTCAGAAACTGCAAGGCATCAATCGAAATTCAAGAGAAGATGAAGCTTTTGGTTCAACTGTACCAAGAGATGATTGGACAAACACCC…	742	1	AT1G01730.1			similar to unnamed protein product [Vitis vinifera] (GB:CAO39582.1)	59.26	189	71	4	94	642	34	218	9e-52	200
MMN1.Contig_1198	GGCGAACTTTGCCTGATAGACCTCTTACAGAAAAAGAAAAAGAAAAATCATGGAGTCTTCTGTATCACAAACACTAAGTCAATTATTAGATCCCACAACGGCTATTCTCATCATCGTCTCACTTTTCATATTCATCGGCCTCATCACACGACGGCGAAGGTCTTACCCACCCGGTCCACGTGGTTGGCCCATCATAGGCAATATGTTAATGATGGACCAACTCACCCACCGTGGTTTAGCCAACTTAGCTAAAAAATATGGCGGCTTGCGCCTTCTCCGCATGGGCTTCCTCCATATGTATGCCGTCTCATCACCTCATGTGGCTCGACAAGTCCTCCAAGTCCAAGACAGCATCTTCTCGAACCGGCCGGCAACGATAGCTATAATCTATTTGACTTA…	767	1	AT4G36220.1	FAH1 (FERULATE-5-HYDROXYLASE 1); ferulate 5-hydroxylase	encodes ferulate 5-hydroxylase (F5H). Involved in lignin biosynthesis.	Identical to Cytochrome P450 84A1 (CYP84A1) [Arabidopsis Thaliana] (GB:Q42600); similar to cytochrome P450, putative / ferulate-5-hydroxylase, putative [Arabidopsis thaliana] (TAIR:AT5G04330.1); similar to cytochrome P450 [Isatis tinctoria] (GB:ABL07485.	74.59	181	45	1	50	589	1	181	9e-69	241
MMN1.Contig_1199	GACAACAAAACTCAAAACACACATATTATCTCCACTGAGTTCTCTCGTATAATAATCATCTCCTTCGAGAAATATGGCGATTTCAAAAGCCCTTATTGCTTCTCTTCTCATATCTCTTCTTGTTCTCCAACTCGTCCAGGCCGATGTGGAAAACTCAAACAAAAAGAGGGGTTACCGCAAAAAAATTGATTGTGGAAGTGCTTGTGTAGCAAGGTGCAGGCTCTCAAGTAGACCTAACCTTTGCCACAGAGCGTGCGGGACTTGTTGCGCAAGATGCAACTGTGTGCCACCTGGTACGTACGGAAACGACTACTAGTGTCAGTGCTATGCTACCCTCTGTCACTCACTGTGGTCGCCGTTAGTGCCCTTAAGTATACTTAAAACTTCTCTAATTGGTTC…	779	1	AT1G75750.1	GASA1 (GAST1 PROTEIN HOMOLOG 1)	GA-responsive GAST1 protein homolog regulated by BR and GA antagonistically. Possibly involved in cell elongation based on expression data	Identical to Gibberellin-regulated protein 1 precursor (GASA1) [Arabidopsis Thaliana] (GB:P46689;GB:Q8W114;GB:Q9LR14); similar to unknown protein [Arabidopsis thaliana] (TAIR:AT2G18420.1); similar to snakin2 [Solanum tuberosum] (GB:CAC44012.1); contains I	88.64	88	10	0	74	337	1	88	1e-30	130
MMN1.Contig_12	GGGTCGCATTCTTTTCTTTTTCTTTTTTTTTTCCTCTTCCATTTCTCTTAGTCTTTGTTATTTTTCTTCATCTCCTTATGCTAYTCTAATTGATTTTTGTTTTGTTTACAGATCTGAGAAMAAGGAGCAGCTATAAGACGGGAAGAAGAAGTGGTGGTCTGACAGAGCAGACGCGCCAGAGATGGAGGTGGTCTAACGAATCGAAGGAACTGTAGAGGCTGTATGTATTAGACCAACACCGGTGGCTCCACGACCAGATCGAGTCGTGGCTTCAGTTSGAACCACTCCAAGTCGTCGCTTCAGATGGAACTTCGAGTCGTCGTGGAGCCGTGCAACTGGAGCCGGTGGAGAAGCTGGTGGGAGTCCGAGATGTTGATGGTGTATTTGTGTTTATATATG…	488	2	AT1G11480.2	eukaryotic translation initiation factor-related		similar to unnamed protein product [Vitis vinifera] (GB:CAO24188.1)	26.03	73	53	1	111	326	436	508	0.25	31.6
MMN1.Contig_120	GGACATCAATTCACATTCTCTCAGAAACCAAACAGCAAAAAGAGTAATAAACCCAAATGGCTCGTACCAAGCAAACCGCTAGAAAATCCACCGGAGGAAAGGCTCCGAGGAAGCAGCTGGCGACGAAAGCGGCGAGGAAGTCGGCTCCGGCCACGGGAGGAGTGAAGAAGCCGCACAGATTCCGTCCCGGAACCGTCGCCCTTCGTGAGATCAGGAAGTACCAGAAGAGCACCGAGCTTCTCATCCGCAAGCTTCCCTTCCAGCGTCTGGTCCGTGAGATCGCTCAGGACTTCAAGACGGATCTGAGGTTCCAGAGCAGCGCCGTCGCGGCTTTGCAAGAGGCTGCTGAGGCTTACCTTGTTGGTTTGTTCGAAGACACCAATCTCTGCGCGATTCACG…	701	4	AT5G65360.1	histone H3		Identical to Histone H3.2 (HTR1) [Arabidopsis Thaliana] (GB:P59226); similar to histone H3 [Arabidopsis thaliana] (TAIR:AT5G10390.1); similar to histone H3 [Arabidopsis thaliana] (TAIR:AT5G10400.1); similar to histone H3 [Arabidopsis thaliana] (TAIR:AT3G	100	136	0	0	57	464	1	136	3e-60	228
MMN1.Contig_1200	GAAGAAAGTTAATAAAATTTTTTTCTAATATAATCTAAATCTATCAGTATAGATTAATTAAATGAGCACTCTCATACGGATTTAAAACGTTAAATACAAAAAATTTTTCAAGAAAAAGGGAAAAAATAGTTGGGTTTTAAACTTTTGAATGTCTGTTTTGTTTGAAAAATAATATATATT	180	1	no significant hit
MMN1.Contig_1201	GATCGGAGCGATAGAAAGAGAGAGAGAGAGGATGGTGACGAAGGAACAGGTGGAAGCTTCGCTGACTTCGAAACTCAAGCCTATTCATCTCGAAGTCAATGACATATCTGGAGTTGCGGTTCGAGTTTTGAAGTCGAGGTTGTCTCTGAACAATTCGAAGGGAAGAGATTGCTGGAGAGGCACCGTATGGTGAATGCTGCACTTGAAGAAGAAATGCAGGAGATTCATGCTCTTTCTATTAAGAAAGTTCAGACCCCACAACAATGGAAACCTTCACAAGACTCTGCTACTCAAGCTAAAGACGCTTGAAACTCTGTTTTTAAGGTTTTGTGAGAAAAGAACAAGAGCATGACTATGTTTGATACTTTTCGTGGTTACTTGCAAATCTACAAGACTATT…	449	1	AT5G09830.1	BolA-like family protein		similar to unnamed protein product [Vitis vinifera] (GB:CAO46485.1); contains InterPro domain BolA-like protein (InterPro:IPR002634)	96.3	27	1	0	32	112	1	27	5e-30	51.6
MMN1.Contig_1202	GAAGCCTCCTCCAAGGGTAAAGGCAAAGCTGGGAAAGCTGCTGATGGTCTTGGAACATGCACTTATGTTAAAGCGAGGCATGTTTTGTGTGAAAAGCAAGGAAAGATCAATGAGGCATACAAGAAGTTGCAGGATGGTTGGTTGAGCAATGGAGACAAAGTTCCTCCTGCTGAGTTTGCTAAGATTGCAGCAGAGTACTCGGAGTGCCCATCAGGGAAAAAAGGAGGAGATCTTGGATGGTTCCCTAGAGGGAAGATGGCAGGTCCATTCCAAGATGTCGCCTTCAACACACCTGTTGGTGTCACTAGTGCACCTTTCAAATCTACGCATGGATACCACATCATCTTGTCGGAAGGAAGGAAAAACTGACAGATTACATCTCTGTTCTGCTCTACTCTA…	534	1	AT1G26550.1	peptidyl-prolyl cis-trans isomerase PPIC-type family protein		similar to PIN1AT (parvulin 1At) [Arabidopsis thaliana] (TAIR:AT2G18040.1); similar to parvulin-type peptidyl-prolyl cis/trans isomerase [Lotus japonicus] (GB:CAM59672.1); contains InterPro domain Peptidyl-prolyl cis-trans isomerase, PpiC-type; (InterPro:	100	106	0	0	49	366	37	142	2e-60	228
MMN1.Contig_1203	TGTTTTGTGTTTTTTTTTTGTGTCTGTTTTTGAGTGCTAATTGTGTCCTAATGAAGTAGGTGGAGGTCTTGTTTTACCCAGACGTTTTCTGTTTTTCGTCCTTGTTTCTGATCAGGTTACGAAATCCATTGAAGGCTTGCTTCCTTTGCCAAAGATTCACAACCCAAACGACCCACGAAGGATCGAGTTGAAAGAGCTCGAGGCAGTTAAGGCAGTGATCGATGTGAAAGCGCACTCTTTGGTGCGGAGAGAGCTCTGGGCTGGTCTTGGTACTTGATACTACAGACCGCAGGGTTCATGAGGCTAACGTTTTGGGAACTCTCTTGGGACGTGATGGAGCCAATCTGTTTCTATGTCACGTCCATGTACTTTATGGCTGGGTACGCTTTCTTCCTCAGG…	722	1	AT2G23790.1			similar to unknown protein [Arabidopsis thaliana] (TAIR:AT4G36820.1); similar to unnamed protein product [Vitis vinifera] (GB:CAO22909.1); contains InterPro domain Protein of unknown function DUF607 (InterPro:IPR006769)	86	100	14	0	271	570	237	336	1e-69	177
MMN1.Contig_1204	GACACAACAAAGACATTCCTTCTTCTCTCTTCGCTCAGCTCCTACAACAAAGGGCGAAGAATCTCTCCCTCCTCCTTGACCTTCTCTTCTCCATCGATTCCCTTTGAGTTCAAAAATGGTTGAACAGACTCAGCAACCGTCGATTTTCCAGAAGGCTGCTTCTGGCCAGCTCATGCGTTCTGGCGTTTCTCAGGACATCCATGGCTACGCATCTGGTTTCCAGAGGCGCGCGACGTACGGAAACTACTCCAACGCTGCGTTTCAGTACCCTCTCGCGGCTACTTCCAGGATTGTGGCGACTACTACTGCTTCTCCTGTGTTCGTGCAAGCTCCAAGTGAGAAAGGATTCTCTAGCTTCGCTATTGATTTCTTGATGGGTGGTGTTTCCGCTGCTGTGTC…	769	1	AT5G13490.2	AAC2 (ADP/ATP CARRIER 2); binding	Encodes mitochondrial ADP/ATP carrier	Identical to ADP,ATP carrier protein 2, mitochondrial precursor (ANT2) [Arabidopsis Thaliana] (GB:P40941;GB:Q9FY52); similar to AAC1 (ADP/ATP CARRIER 1), ATP:ADP antiporter/ binding [Arabidopsis thaliana] (TAIR:AT3G08580.1); similar to AAC1 (ADP/ATP CARR	82.14	224	34	3	116	769	1	221	2e-100	361
MMN1.Contig_1205	GGAGGTTAAAAGAACGGTGCTTGAATCATCTCACATCATCGGGTGATTCTGAGATCTCGCTTTCCTCTGATCATCGATCATCTGATCTCTTACTTCGTCCCGTAAGCTAGCCAGACGATGGCCACTGAGATTGGAGAAATCTCCATCGTATGTAAGCACTGTGATAGAGACATTCTGGCTCCAAATATAGATCTGCATCGTGTACGTTGTGCTCGGAATCTAGAAAAGTGCAAGATTTGTGGTGATATGGTTCCCAAAAAGCATGCTGAGGAACACTTCTCCAACACACATGCTCCGGTACCGTGCTTGATGTGCAAAGAGACCATAGACCGTGAGGTTTTGAATAGTCATACAGAAGAAATCTGCCCCAAGAGGATGGAAACGTGTGAGTTCTGCGAG…	779	1	AT1G09920.1	TRAF-type zinc finger-related		similar to PRLI-interacting factor K [Arabidopsis thaliana] (TAIR:AT4G15420.1); similar to unnamed protein product [Vitis vinifera] (GB:CAO61575.1); contains domain PTHR16295:SF10 (PTHR16295:SF10); contains domain PTHR16295 (PTHR16295)	79.17	24	5	0	630	701	168	191	3e-74	41.2
MMN1.Contig_1206	CGCAAAGTTTATATATTACATCTTCTGCAAACAACTACCAGTGGTGTTGCAGGCTTTTGTGCATGGAGATGTGAACTTGGTGAACCACCATCCTGAGTTGAGATAAGCTCTTGTTTAGGTATAGATCAGCGCCAGCCGGACGAGTGCAAAAGAGTCTATGGCTGGGGTCCTCTGTGGCAAGGGACTTCGCCTGATGGTTTCCGGACTCATACTCTCCCTGAGAAACAATGCGTGGATGACTGCAAATGTTGTTTCCCACCTGTTAGCTCGATTCCGTGGTCTCATACTCTTATCTTCTAAGGTGTTGCTTTCTACTCTGGGACTCGGGGAGAGGGGATGTCTACTCCTAGTCGATACAAACTCTTTTGTGGTTGACCCATATATACAACTGTTGCTAGA…	781	1	AT4G22920.1	ATNYE1/NYE1 (NON-YELLOWING 1)	Similar to the tomato senescence-inducible chloroplast stay-green protein 1. It is upregulated during maximal senescence in the Arabidopsis life cycle, especially in senescent leaves.	similar to unknown protein [Arabidopsis thaliana] (TAIR:AT4G11910.1); similar to putative staygreen protein [Nicotiana tabacum] (GB:ABY19382.1)	73.68	38	10	0	2	115	148	185	4e-34	61.6
MMN1.Contig_1207	GAGACAGCGTTTCATTATCACTTCCGACAAAACTCTTTATACCTTTCCGCACTTCCTTTCCACCGACTTCCTCCATGGCTCCGATTGCTGTTGGCGATGTTGTACCTGACGGATCTATCTCCTTCTTCGACGAGAACGATCAGCTCCAGACTGTCTCCGTTCACTCCCTCGCCGCCGGTAAGAAGGTCATCCTCTTCGGTGTCCCTGGTGCTTTCACCCCCACCTGCAGTATGCAGCATGTGCCTGGATTCATCGAGAAAGCAGAGGAGCTGAAGTCAAAGGGTGTTGACGAGATCATTTGCTTTAGTGTGAATGATCCGTTTGTGATGAAGGCATGGGGGAAGACGTACCCAGAGAACAAGCATGTGAAGTTTGTGGCAGACGGTTCAGGAGAATACA…	768	1	AT1G65980.1	TPX1 (THIOREDOXIN-DEPENDENT PEROXIDASE 1); antioxidant	thioredoxin-dependent peroxidase	Identical to Peroxiredoxin-2B (PRXIIB) [Arabidopsis Thaliana] (GB:Q9XEX2); similar to TPX2 (THIOREDOXIN-DEPENDENT PEROXIDASE 2), antioxidant [Arabidopsis thaliana] (TAIR:AT1G65970.1); similar to type 2 peroxiredoxin [Brassica rapa subsp. pekinensis] (GB:	93.79	161	10	0	75	557	1	161	2e-72	269
MMN1.Contig_1208	GGAGAGGCTAGGGTTTGTGATTCAGGCAGCAAAGGATGATCGAGGAGGGGCTAAGAAACCGTCTGGTGATTAAGGGAGGGTCGGGTGGTGCGAAGATGACGGGATGGGCGATGAGGCTATGCTCAATGTGGCGCATAGCGGGACGAGAGCGGGAGACATTCGCCCCGTGCTGAGTTCGACAAGATCGCGGTTGATTTCTCTCTCAAGGACTACGGGAGACACGGCGGCATAGCGTGGCAGGGCTTCCTACAAAGAAGATGGAAAGAAAAATAAAAAAAAACCTGCTTATGACC	293	1	AT1G32360.1	zinc finger (CCCH-type) family protein		similar to zinc finger (CCCH-type) family protein [Arabidopsis thaliana] (TAIR:AT2G35430.1); similar to hypothetical protein OsI_026903 [Oryza sativa (indica cultivar-group)] (GB:EAZ05671.1); contains InterPro domain Zinc finger, CCCH-type; (InterPro:IPR0	31.71	41	19	1	48	143	233	273	0.44	29.6
MMN1.Contig_1209	GAAGATATCGATTACTCTCCTTATGACGAAGGCGAATGGAGGTTGAAGCTATGGCTTTTCATAGCGTATGTCGTGGCGTTTGTTTCCCTAGCTGCTTCTGTTGGTTTGCTGATTCAAGATTCGGTCGTCAAAACTGGGCCTTCCACCTGGACTGGTGTCGCCGGTGTCTTTCAATGTGTATTTGTATTGATAAGTGGGCTAATGTATTGGACATCACACTCCGAGTAAGTAGGCTCGCAGGCAAATACTTACTCCAACGCAGATACATGTGGTGACAACTTACGAATGCCTCTCGTTTCTTCTTCTCTGTAAATTCTCGTGTCTTGTCTGGTCAAGCTTTGTGTTGTGTGCTAGATTCCTCCATTGCAGTGGTGTGTGTTTGTTTTAAACTTTGTCGTT…	567	1	AT1G36980.1			similar to unnamed protein product [Vitis vinifera] (GB:CAO61796.1); contains InterPro domain Protein of unknown function UPF0220 (InterPro:IPR007919)	100	75	0	0	1	225	61	135	4e-39	157
MMN1.Contig_121	GTTTGGTTCTGCTGCACCTTACTCTGTGTTTCAAGACTCTAGGCCCTTCTTGAGATGGGCACGTGAGAAAGGGCTTATAGTCGGACTTGTTAGCAACGCGGAGTATCCGATATCAAGAAGTCATTTTACCTGCCTTGGGTTTGAACAAGGGAGAGTGGGACTTTGGTGTGTTYTCTGGTATGGAAGGGATAGAGAAGCCAGATCCGAGGATATACAAGCTGGCGTTAGAGAGAGCTGGGAACAACATAAGGCCTCAAGAGGTTCTGCATATTGGAGACAGTATGCGTAAAGATTATGCCCCGGCGAAGAGTACTGGGATGCATGCTTTGTTGCTTGATAGGTTTAAGACAGAAGCTGCTAAAGACTGGAGAGAAGCTGGAGCTGTTGTGCTTCCTGATT…	567	3	AT5G44730.1	haloacid dehalogenase-like hydrolase family protein		similar to predicted protein [Physcomitrella patens subsp. patens] (GB:EDQ82170.1); similar to Os06g0665100 [Oryza sativa (japonica cultivar-group)] (GB:NP_001058303.1); contains InterPro domain Haloacid dehalogenase-like hydrolase; (InterPro:IPR005834);	81.75	126	23	0	66	443	130	255	3e-55	211
MMN1.Contig_1210	GGAAACAGTGAAGAAACAAAAAAAACACAAGTCATATCGTGTTTCGCCGACCGGAGAAAAATATCTTTCTTCCGCTTCTTTATTTTCAACAAGAGTTATCGTTGGAATCGGTTAGCCATGGCTAACGCGGCATCAGGAATGGCTGTGCATGATGATTGCAAGCTCAAATTTTTGGAACTGAAAGCCAAAAGAACATTCCGTACCATAGTCTACAAGATTGAGGACAAGCAAGTGATTGTGGAGAAACTCGGTGAGCCTGAACAATCGTACGATGACTTTGCAGCAAGTCTTCCGGAGAACGAATGCCGTTATGCCATTTATGACTTCGACTTTGTCACTGAGGAGAACTGCCAGAAGAGCAAGATTTTCTTCATCGCATGGTCTCCTGACACTGCCAAA…	751	1	AT3G46000.1	ADF2 (ACTIN DEPOLYMERIZING FACTOR 2); actin binding	Encodes depolymerizing factor 2.	Identical to Actin-depolymerizing factor 2 (ADF2) [Arabidopsis Thaliana] (GB:Q39251;GB:Q9LZT2); similar to ADF4 (ACTIN DEPOLYMERIZING FACTOR 4), actin binding [Arabidopsis thaliana] (TAIR:AT5G59890.1); similar to unknown [Populus trichocarpa] (GB:ABK9257	95.62	137	6	0	118	528	1	137	3e-72	268
MMN1.Contig_1211	AGAGAATTAACAATAGATAAATAACAAAAATAACCAGACAGTATTAGGTGTGTTCTGCTCGCGCGGCCGCCTAAGACACACCGGTCGTATATAGTGTGTTTAGCAGGAAGAGAAGACAGCGCCCCTCTATATTCTCTCTATATATAAAATATTTATATAGAGTATGTTACTCTCCTGCGGCGCGCCGCCCAAGAAATCTGCCCCGGAGTATAACGTGCCTCTTCTTGCGCGCGGAGGGGAACACAAAATCATACTACAATAANCTTTTCGTAGATAGTTCATTAATCGCTATACTACAAATTGGCATAGAGAATACACTTTGTACTCTTCGATCATCCCTCACATCGTGGGACTCTCTCCTGTTTGAGATTACGCTAGCGGTATCGCAGTCGNGCTATC…	1178	1	no significant hit
MMN1.Contig_1212	GATCCAAGTAACATTTAAATCTCATCAGCTAAATAAACTAAAAAATGATGAATCCTATGTTTTACTTTCTTCTTGCCTTAACCGCTGTTTTAGCCGCGACCGCAAACGCAGGACCGGTTCTCGACATTGATGGTGATATCATATTCCACGGCAGCTACTACGTTATCCCCGTCATCCGGGGCCCTGAAGGTGGCGGTCTAACTCTCACCCCACGCAATGGCAACCAGTGTCCCCTCTTTATCGGACAGGAGCGTTCAGAGGTCGAAAGGGGCATTCCCGTGAAATTCTCAAACTGGAGGTCTAGAGTTGGGTTCGTTCCCGAATCCGAGAACCTCAACATCAAGATGGATATCGAACCTACGTTCTGCGCTCAGTCAACTTATTGGTGGGTCACTTCAG…	768	1	AT1G73260.1	trypsin and protease inhibitor family protein / Kunitz family protein		similar to trypsin and protease inhibitor family protein / Kunitz family protein [Arabidopsis thaliana] (TAIR:AT1G17860.1); similar to trypsin inhibitor propeptide [Brassica oleracea] (GB:AAB68964.1); contains InterPro domain Kunitz inhibitor ST1-like (In	65.81	117	40	2	42	392	6	120	5e-40	131
MMN1.Contig_1213	GGGAACCCATTTTCTGAGTATTTTGTGTTTGGTGTGTGAATTTGATTATGGTCGTGGAATATGAACTTGTGTGTAAGCGTTGTCTGCTTGGTGTGTTGAGTCAAGGATTGGTGGGGGAGGCTTTGGATCTGTTTCGGTTTGGTTGGGGTAGTAGTGGGTACTTATGTTCTTCGTGGGATGTTTGGATGATTTGTGGAGACTACTCTATATTGTCGGTGCAGCGTCAGATGGATTGATGTCTCGGATGGATTGTTGTAATTGAGGTTGGTATGTCCTTTTGAGAATGTCTCCTTGTGGCGTGAGTGTTGTTGTAAGTGTTTGTCTTGTTTGTTGTGGATGATCGTTGAGGTTTTGGTAGGTTTTGGGCCAGGATGGAAGTCGTGACTTGTGGCGGGTTGT…	775	1	no significant hit
MMN1.Contig_1214	TTTTTTTTTTATTTAAATATTATATATTATGGGGTGCTACTCGCCGCCTACTTTATTCCGGGGGGAGAAACACCTTCAGCTGATTCAAAGAGAGTAGGTGGATGAGAATAAGAGACACGGCGAGGATGGACTGGTGTCGACGGGAGTGGAAGGATGAGTGTGGAGAGCCAGGATAGAGGAGGTATCATATCAGATTATCTTGAGTGTTCTTTGATCGAAACAAAGGGACCACCCTCTCACAGGGACTTTTGTCATGGCCATCTACAACAGTCACAGACAAGGCCCCGACGATAAGTGTAAGCGGTCTGTGTAAGATTCCCGACAAGCAGTCCGGCATTTTTTTTTTATAATGCATCTTTTGTCGTGATTATTTTTATTAGTGTGTTATTTGTTCGACTG…	880	1	no significant hit
MMN1.Contig_1215	GGGGGGGGACTGACAGTATCAGCGACAGACTAAGAAGACATGGGGTGGCAATCATAGGAATACGGCCTCGAAGCTCGCGGGTTTGGTGGCTTTGGAAAGGATGACCTGAAGACGGTGGCTGCGGCCAGTGTGGATGAGAGTGTGGATGAGTTGAATAGAAGCTCGTCGTCGGACGGCTGGGCATTCGATCCTGTGGAGCGAATTAAGGAAGGCTTCCTCACCTTCGAGGTGGAGAGATACGATAGGAACCCTGCTTTGTACGGTGAGCTCGACTGAGGTCGGAGCCCCAATTACGTGGTGTTTGCTCGTGCGGACTCACGTGTGTGCGCGTCGCACGTGCTAGAGTTCTGTCCTGGAGATGCCTTCGTGGTTCGGTGGATTGCTAAGATGGTTCCTCCT…	751	1	AT5G14740.1	CA2 (BETA CARBONIC ANHYDRASE 2); carbonate dehydratase/ zinc ion binding	Encodes a beta carbonic anhydrase likely to be localized in the cytoplasm. Expression of its mRNA is seen in etiolated seedlings and points to a possible nonphotosynthetic role for this isoform.	Identical to Carbonic anhydrase 2 (CA2) [Arabidopsis Thaliana] (GB:P42737;GB:Q42116;GB:Q9FDZ0;GB:Q9LER2); similar to CA1 (CARBONIC ANHYDRASE 1), carbonate dehydratase/ zinc ion binding [Arabidopsis thaliana] (TAIR:AT3G01500.2); similar to CA1 (CARBONIC A	47.37	38	19	1	530	640	237	274	1e-53	31.6
MMN1.Contig_1216	CTTTGGTGACTCTAGCTCACTCTGTTCACGAGTCCAGACCATCTTTGACTTTTTTTAACCCATAATGCTATTTTTGTGCAGCTTGACCTTTTGGCATTGGTCGCCAATTCTGGATGCATATGCTCGTGACAGGACACCTCCGCCTCCTTCTTCGAGTCCCTGTAAAGTCCTTTCTTTTGATGTTCAGTCCCTTTAGGTGAGTGCACCTGTGGAGCGCTGTTCTCTGAGCGATTCCGGTTTCTGATCGATGCTTGTCTTCATGCACATGATATACACAGGGCGGCAACCTACTGTTCTAAACACATTTACATTGTTTTGTGTCTTAGTTGTGGATTCTTGTTTAACTCTTGCTTTTGATCTCTTTATCTGTATTAATTTTCTTTATTGCCCACTTTTTTA…	505	1	AT4G19180.1	nucleoside phosphatase family protein / GDA1/CD39 family protein		similar to nucleoside phosphatase family protein / GDA1/CD39 family protein [Arabidopsis thaliana] (TAIR:AT2G02970.1); similar to hypothetical protein [Vitis vinifera] (GB:CAN73342.1); similar to unnamed protein product [Vitis vinifera] (GB:CAO41424.1); c	34.72	72	44	3	293	499	592	657	3	28.1
MMN1.Contig_1217	GTTGAACAAGAGAAGCAGACAGCCACCGTAGTTTCTGCCGAGACGATCGACAACAAGCCAAAGAGCAGTGAAGGAGATTTTGCTGCTGCCCCGGCCGCCGCGGCTGCTACTTCCGCCTTTGTTTACAAAGTGGATATGCACTGTGGAGGTTGTGCAAAGAAGATCAAGCGAATGGTGAAGCACTTAGACGGAGTGAAAGATGTGACGGCGGATATGAGTGGTAACAAGCTCACGGCGGTCGGAAAGATCGATCCGGTGAAGTTCCTATATACGTGTTGAGGAGAAAATGATGAGGGTGGTGTTAGTCACCAACCCACCACCACCATTACCGCCTAAAGTAGACGCATCTGCTGCCGCCACTGCCGTTGGAGAGAAGAAATCCGACGGTGGAGATTAGGC…	727	1	AT2G36950.1	heavy-metal-associated domain-containing protein		similar to heavy-metal-associated domain-containing protein [Arabidopsis thaliana] (TAIR:AT5G03380.1); similar to unnamed protein product [Vitis vinifera] (GB:CAO18197.1); contains InterPro domain Heavy metal transport/detoxification protein; (InterPro:IP	64.58	48	17	1	335	478	120	166	2e-30	41.2
MMN1.Contig_1218	AAATAAATAAATATTTATAATAAGTAGGTGGCGCTTTTGATCTGCTCCTCCGCACGCTCACGACACACACACCAATCAGCACGCGGCGAGGCTGTAGATCAGAGGCGAAGGAAGAACACGGCGCGCCGCTCTATCATATATACTTCTTATATGAGTATATCACTATATATATCACAGACGATATATACTACATGCTACAGCAGCGACTCAGCGCAGCAGCACTGATCGTCGCCTCGCGGAGAGATATACTGCGCTCATTCATACTAGCTCAGCGCGGCGAGGGCGNGACGAATNTGAATGTACATGCACTAGCATACTGTACCATTCGGCCGTTGATAACTGCATGACTTAGAGTATTAGTTAGAGTGTCGTTCATATGGATCATAGCTCTCTAATATT…	1350	1	no significant hit
MMN1.Contig_1219	GAGCTCTACGGGCTCCCGATTCTCCCCGACGGGATCCAGGACTACACGGGGAACGGCACGGCGCTTCCTGATGCTCGCGCGTGAGCCGATCATCCCTCGCACGGATCGGCCCTTCAAACGAGCATCGTCTTCGCCGCTCAATGAGCACCAGGGGACCCGCGTCCTCTTCTGAGTGCTCTCCGCGTTTGCGGTTCGAATCTTCTGTCTGACGTAACATCGAGTCGCGGCCGCGCCATAACTGCCCGCTCAGAGTCGGCAACAACTGAGACATGTGAACTAACAAGCGCTTCTGAGTACACTGTCTACGTGAATTTCGAGGCGTCGATGGCAGAGGCGCGTGCGACAAACACGCTATCGGATGCACAGGAGTACACGTCATTCCAGAGGGTGCTGGGAAGT…	651	1	AT5G22630.1	ADT5 (AROGENATE DEHYDRATASE 5); arogenate dehydratase/ prephenate dehydratase		similar to ADT4 (AROGENATE DEHYDRATASE 4), arogenate dehydratase/ prephenate dehydratase [Arabidopsis thaliana] (TAIR:AT3G44720.1); similar to unknown [Populus trichocarpa] (GB:ABK95815.1); contains InterPro domain Prephenate dehydratase; (InterPro:IPR001	45.96	161	74	4	1	444	278	424	6e-24	107
MMN1.Contig_122	GGGCACATTCGGTCTCCAAAGGCTTAGTAAATTGGGAGGCTTTAGAACATGCCCTCTATCCCTCCAAATGGTTTGACATTAAAGGTACATGGTCCGGTTCAATAACAATCGTACCGGGAAAAGGACCGATTATCCTCTATACAGGTGTTAACCAAAACGAAACTCAAATCCAAAACTACGCAATCCCAAAGGACCCCTCAGACCCATACCTAAGAAAATGGATTAAACCAGATGATAACCCGCTCGTAATGCCAGACTATACCATGAACGGTTCAGCTTTCCGTGACCCGACCACGGCATGGTTCTCCAAAGACGGGCATTGGAGAACCGTGGTTGGTTCAAAAAGAAAGCACAGAGGGATTGCTTATATCTACAGAAGCCGAGATTTTAAGCATTGGG…	1784	10	AT2G36190.1	ATCWINV4 (ARABIDOPSIS THALIANA CELL WALL INVERTASE 4); hydrolase, hydrolyzing O-glycosyl compounds		similar to ATCWINV2 (ARABIDOPSIS THALIANA CELL WALL INVERTASE 2), hydrolase, hydrolyzing O-glycosyl compounds [Arabidopsis thaliana] (TAIR:AT3G52600.2); similar to ATCWINV2 (ARABIDOPSIS THALIANA CELL WALL INVERTASE 2), hydrolase, hydrolyzing O-glycosyl co	86.84	304	40	0	3	914	94	397	0	577
MMN1.Contig_1220	GGCTTTAATCAGGTTTCTTGTCTGAAACAATGGCGATTCTCTCTGTACGAACTCCAAGTTCCATTCAGCTCCTTCGTTCCTCTGTTTCTCCCATCTGCTCGAAACCTTTGTTTCAATCATCATCCAGCTTTTCATCTTCCATTGTTTCTGCTCCTTCCACCAGATTAAAATCCAATTCCCCGATCTCTAGACCTCGTGTAGTTCTCGCGAGAGCTTCCACGGGAGTCGCTGAACCCGTCGCTGATTACAGAGAAGATATAGGCGAGATTCTCGGAGATGTCTCCATCTTTACTGCTTCAGGACAGCCCGTGAAGTTCAGTGATCTCTTGGATCAGAACGATGGAGTTTCAGCTGTTGTGCTTTTGAGGCATTTCGGATGCGTTTGCTGTTGGGAGTTTG…	711	1	AT5G65840.1			similar to antioxidant/ oxidoreductase [Arabidopsis thaliana] (TAIR:AT2G37240.1); similar to hypothetical protein [Vitis vinifera] (GB:CAN81556.1); contains InterPro domain Thioredoxin-like fold (InterPro:IPR012336); contains InterPro domain Thioredoxin f	80.26	233	40	3	30	710	9	238	9e-88	319
MMN1.Contig_1221	CAAAGGAAAATACGAAGGAGGGAAAGTTGATGCTACTTTCTCCTTCAAAGATGATGACTTTGTCAAAGTTGCTACCGGCAAGATGAATCCTCAGATTGCTTTCATTAGGGGTGCGATGAAGATCAAGGGTAGTCTCAGTGCGGCGCAGAAGTTCACCCCTGACATTTTCCCCAAGCCTTCAAAGCTGTGAACACAAGAAGAAATGGTACTAGCAGACCCCTTTGACTCAGGCTCAATTTATGTCTCCTTCAAAGGGTTTGAGAGCTGGATTATTAAAATGCAATGTTTAAGAACTAGTCCCTAGACAATAAAGGTCTCTTCTAAGTATCGTCGTATGTTTCTGGTTCAATCGGTGTTTGGTTTAATAATATTAATACTTTTGCTTTGAAATAGATTTCT…	408	1	AT5G42890.1	sterol carrier protein 2 (SCP-2) family protein		similar to hypothetical protein [Vitis vinifera] (GB:CAN82147.1); contains InterPro domain Short-chain dehydrogenase/reductase SDR; (InterPro:IPR002198); contains InterPro domain Sterol-binding; (InterPro:IPR003033); contains InterPro domain Sterol-bindin	98.39	62	1	0	2	187	62	123	5e-30	126
MMN1.Contig_1222	GGGTAGGGGATGGTTGGGACAAGTGGGGAGACAAATGGGACGAGAACTTTAACCCGAGCGCTCAAGGAGTGAAGCAAGGTGAGACTTGGTGGGAAGGGAAGCACGGTGACCGCTGGAACCGGAGCTGGGGTGAAGGACATAACGGTTCGGGTTGGGTACACAAATACGGGAAAAGCAGTAGTGGAGAACACTGGGACACACATGAGCAACAAGAGACTTGGTATGAGAGGTTCCCTCACTTTGGTTTCTTCCACTGTTTTGACAACTCTGTTCAGCTCCGAGCTGTTCGGAAGCCTTCTGATTTAGAAAATGATGGAGAAAAGCAATAATTTAAATAAATAGCATTTGGTAC	352	1	AT3G55760.2			similar to unknown protein [Arabidopsis thaliana] (TAIR:AT1G42430.1); similar to hypothetical protein [Trifolium pratense] (GB:BAE71279.1)	94.32	88	5	0	42	305	490	577	3e-52	199
MMN1.Contig_1223	GGAAACAACCCAAACCCTTTGAGATTTCCCAAGATCGATTCAAAGAAAGCAGTTAGGACTGTTCAAGCTATGGCCTCGAAAAGGATCAACAAGGAGCTTAGGGACCTGCAAAGGGATCCTCCAGTCTCATGCAGTGCTGGTCCTGTGGGAGATGATATGTTCCACTGGCAAGCAACTATTATGGGTCCATCTGATAGCCCTTTTGCCGGAGGTGTGTTTCTTGTTTCCATCCACTTCCCGCCAGATTACCCCTTCAAGCCACCAAAGGTTTCTTTCCGCACAAAGGTTTATCACCCGAACATCAACAGCAATGGCAGCATCTGTCTTGACATTCTTAAAGAGCAGTGGAGCCCTGCGCTTACCGTATCCTAGGTTCTTCTGTCGATCTGCTCATTGTTG…	756	1	AT5G56150.2	UBC30 (UBIQUITIN-CONJUGATING ENZYME 30); ubiquitin-protein ligase		similar to UBC28, ubiquitin-protein ligase [Arabidopsis thaliana] (TAIR:AT1G64230.1); similar to UBC28, ubiquitin-protein ligase [Arabidopsis thaliana] (TAIR:AT1G64230.2); similar to hypothetical protein [Vitis vinifera] (GB:CAN77946.1); contains InterPro	91.22	148	13	0	70	513	1	148	2e-70	262
MMN1.Contig_1224	GACAGAAAACTATCAAAGCCCAGTGCTGTGTGTATCTTCTATCAGAAAAATGGCAGAAAATGCTGATTTGTTGGAGTGGCCAAAGAAGGATAAGCGTCGTTTTCTCCATGTTGTGTACCGCGTTGGTGATCTTGATCGCACTATCCAGTTCTACACTGAGTGCTTTGGCATGAAGCTGTTGAGGAAAAGAGATGTCCCTGAGGAGAAGTACTCTAATGCTTTCCTTGGTTTTGGTCCTGAAACCTCCAACTTCGTTGTCGAGCTCACTTACAATTATGGTGTTAGCTCATATGACATTGGAACTGGATTTGGGCATTTCGCTATTTCAACTCAAGATGTTTCCAAGATGGCTGAAGTTGTGAAGATAGCCAACCAAGAGCTTGGAGGAAAGATCACCAG…	726	1	AT1G11840.5	ATGLX1 (GLYOXALASE I HOMOLOG); lactoylglutathione lyase	Encodes a glyoxalase I homolog ATGLX1.	similar to lactoylglutathione lyase, putative / glyoxalase I, putative [Arabidopsis thaliana] (TAIR:AT1G67280.1); similar to putative lactoylglutathione lyase [Brassica rapa] (GB:BAF81517.1); contains InterPro domain Glyoxalase/bleomycin resistance protei	76.92	143	33	1	50	478	1	139	1e-58	223
MMN1.Contig_1225	GGTTGCTTCGACGTCGAAATCGAATCCAGGCTGGACTCCGAGCGAGAGAGGTGAAGAGGAACAGCGATGGCATTGACGGTGGCGAAGAGTGCGTTGGAGACGATTAGAGAGAAAGGTCTCGGTGGCTTTCTCAGGATGATCCGTGAAGAAGGCTTCCTGAGATGCCTACCAGGTGGGAACCTCTTGCAAACTAAAATACACAACATAGGAGCAACTCTTGTTGGTGTGGACAAGTTCGGTAACAAATACTACCAGAAGCTGGGAGATACTCAATACGGTAGACACAGATGGGTAGAGTACGCATCCAAGGATCGTTACAACGCATCTCAAGTACCAGCGGAATGGCACGGATGGCTTCATTTCATCACTGATCACACTGGAGATGAGCTGTTGAGTCAG…	727	1	AT3G03100.1	NADH:ubiquinone oxidoreductase family protein		Identical to Probable NADH dehydrogenase [ubiquinone] 1 alpha subcomplex subunit 12 [Arabidopsis Thaliana] (GB:Q9M9M9); similar to unnamed protein product [Vitis vinifera] (GB:CAO62196.1); contains InterPro domain NADH:ubiquinone oxidoreductase 17.2 kD su	94.34	159	9	0	67	543	1	159	5e-90	327
MMN1.Contig_1226	TTCTTTTTATATATTTTATTATGTATTCACTTATATAGTAGCGCGTCGCTTTATGCCTCTGCACGTCACGCACCGAACGCAGACGCAGCACGCAGACGTACAGTCAGATGCAGACAGGAGGCAGAGCGCGCTCTGCACTTAATCTGTCTGATATATGACAATATCATATCATAACGTATAGTCTAGTTCAGATCGGATNACGCGAGCAGAGTACTAGTCCTCGCGCCAGAGTTAATGTCCAGTTCACTTGACCGGGCGGGAGAGGTGCTATATCATCACTTAGAGCACTAGTAATCACTCTAGTAGCGTAACTGGTCAACACTGTCTCACGCAGTGTATATATCTTCTTTACAAGACTCATCCGTTCACACGTCTAGCATTACACATCCTCTTTATCTG…	1217	1	AT5G24080.1	protein kinase family protein		similar to S-locus lectin protein kinase family protein [Arabidopsis thaliana] (TAIR:AT2G19130.1); similar to unnamed protein product [Vitis vinifera] (GB:CAO49550.1); contains InterPro domain Serine/threonine protein kinase; (InterPro:IPR002290); contain	45.45	33	14	1	844	930	191	223	5.2	29.3
MMN1.Contig_1227	ATGTGGAGCGGTTCTCATGTTTGACATGGCACAGATTAGCGGTCTTGTTGCTGCCAAGGAAAGTCCAAATCCATTTGATTATTGCGATATAGTTACCTCAACGACACACAAGTCTCTCCGGGGACCTAGGGGCGGTATCATATTCTACAGGAGAGGCTTGAAGGGCAAGAAGCAAAGCATAAATCTTGATCACTGTGAGAGCAATATCCAATATGATTTTGAAGAGAAAATAAACTTTTCTGTCTTCCCATCGCTGCAAGGAGGTCCTCACAATAACCATATAGCTGCTCTAGCCATTGCCCTCAAGCAGGCCGCTTCACCAGAGTACAAGGCTTACATACGCCAGGTCAAGAAAAATGCCAAGGCTTTAGCATCTGCTTTGATAAGCAAAAACTGCAA…	747	1	AT1G22020.1	SHM6 (serine hydroxymethyltransferase 6); glycine hydroxymethyltransferase	Encodes a putative serine hydroxymethyltransferase.	similar to SHM7 (serine hydroxymethyltransferase 7), glycine hydroxymethyltransferase [Arabidopsis thaliana] (TAIR:AT1G36370.1); similar to unnamed protein product [Vitis vinifera] (GB:CAO61783.1); similar to unnamed protein product [Vitis vinifera] (GB:C	91.67	252	17	1	2	745	338	589	2e-124	441
MMN1.Contig_1228	TGGATTTGTTTTTGTCGTTTGATTTCTTGAATTGGGTTGTTCTTGTTTTTACTATCTTTTAAGTGCAAAATAACCATGATGGGTCAAGATCATGAGGTTGGTAGTGATCAGACGCAAATCATTAAGGGGAAGCGTACGAAGCGGCAGAGATCATCCTCTTCGACGTTTTTGGTGGCGGCGGCGGCGACCACAGTCACCTCCACAAGTTCATCTGCCGGCGGAGAAAGAGCAGCTTCCGATGAATACAACTCGGTAGTTTCGTCTCCGGTTACTACAACTGATTGTACAGAAGAAGAGGAAGACATGGCGATTTGTCTCATCATGCTTGCACGTGGAGCTGCTCCATCGCCGCCGCTGCCGGATCTCAAGAATTCTACCAAAACTGACAAGAATCTTTAT…	747	1	AT2G28200.1	nucleic acid binding / transcription factor/ zinc ion binding		similar to zinc finger (C2H2 type) family protein [Arabidopsis thaliana] (TAIR:AT5G04390.1); similar to hypothetical protein [Vitis vinifera] (GB:CAN64839.1); contains InterPro domain Zinc finger, C2H2-like; (InterPro:IPR015880); contains InterPro domain	75	224	55	5	76	744	2	220	1e-74	276
MMN1.Contig_1229	GATCCACCATTCTCATAATAACTTCTCCAAAGCTTACATTTACGGTTACTAGCAACTTTCCGATGACGAGTCCAGCGGTTGATCAAGAGAACATCCCTCCTATGGACGTAACCAACACGACGGTGACGGAGCCTGCTGCGAAGGGAGGCAAGACGAAGAAAGCTAAGGAAGTGAAGGCGAAGGCGAAGAAGCCTGCTACCGCGGCTGCGAAGAAGAAGTCTGTTTCGACTCATCCTACTTACGAAGAGATGATCAAGGACGCGATCGTGTCGTTGAAGGAGAGAACTGGATCTAGCCAATACGCGATTCAGAAGTTCATCGAGGAGAAGCACAAGGTGCTTTCGCCTTCGTTCAGGAAGCTCTTGCTTCTCAATCTGAAGAGGCTCGTTGCTTCCGAGA…	763	1	AT2G30620.1	histone H1.2		Identical to Histone H1.2 [Arabidopsis Thaliana] (GB:P26569); similar to histone H1, putative [Arabidopsis thaliana] (TAIR:AT1G06760.1); similar to histone 1 [Malus x domestica] (GB:BAD00018.1); contains InterPro domain Winged helix repressor DNA-binding	90.32	62	6	0	228	413	61	122	2e-18	89.4
MMN1.Contig_123	GGTCGTCAAGTTGGGGAGACGAAGAGGAGTTTACAGAGGAGGATCTTCTCGCAATCAAGGCCATAGAGGCTTCCCATCTCTCCCAATCGTCTTCTTCTTCTTCGACCGTACGGCCTGCGAACTCAAATCCAAATCGGATCCGGCGCCAATTGCCTCGTTCCATCACTTCTCCCACACCCTCGAAGCGATTTCCACTCTCTCGTTGCAGAGCTAAGAATTTTCCAGCGATGAGGTTTGGCGGTAGGATTTTGTATAGCAAGACTGCTAGTGAGGTTGATAGGCGAGCAATGCAGCTTCTTAAGGTTCTCGATACCAAGAGAGATCATTCTGGACGAGCTTTTATTGGCTTTGATATTGAGTGGAGACCCAGTTTTAGAAAAGGTGTTCTCCCTGGGAAGG…	1099	2	AT4G13870.2	WRNEXO (WERNER SYNDROME-LIKE EXONUCLEASE); 3'-5' exonuclease/ nucleic acid binding	Encodes a protein with homology to the exonuclease domain of hWRN-p of human protein Werner Syndrome Exonuclease (WEX). Forms a complex with the heterodimeric factor Ku. The interaction with KU stimulates WEX exonuclease activity.	similar to 3'-5' exonuclease-related [Arabidopsis thaliana] (TAIR:AT4G13885.1); similar to PREDICTED: similar to FFA-1 protein [Danio rerio] (GB:XP_697980.2); similar to Os04g0129200 [Oryza sativa (japonica cultivar-group)] (GB:NP_001052089.1); similar to	75	284	56	5	3	809	3	282	1e-107	382
MMN1.Contig_1230	GCCGAAGAGAGAGAGAGAAGAGAAATCGAGGAAAATGGAGAAAGGAAAGGGAAGAAAGGAGGAGATCGTTACCAGGGAGTACACCATCAACCTCCACAGGCGCCTTCATAGCTGCACATTCAAGAAGAAGGCACCCAATGCAATCAAAGAGATCAGGAAGTTTGCATTGAAAGCTATGGGAACCAAGGATGTCAGAGTCGATGTTAAACTCAACAAGCAGATTTGGAGCAGAGGTATCCGTGGTCCTCCTAGGAGAGTCAGAGTCCGCGTTGCCCGTAAGAGGAACGATGATGAGGATGCCAAGGAGGAGTTCTACTCTCTCGTCACTGTCGCTGGGATTCCCGCTGAAGGATTGTCTGGTTTGGGCACCAAGGTCATCGATGAAGACGAGTGAAAAGA…	574	1	AT2G19740.1	60S ribosomal protein L31 (RPL31A)		Identical to 60S ribosomal protein L31-1 (RPL31A) [Arabidopsis Thaliana] (GB:Q9SLL7); similar to 60S ribosomal protein L31 (RPL31C) [Arabidopsis thaliana] (TAIR:AT5G56710.1); similar to 60S ribosomal protein L31 (RPL31B) [Arabidopsis thaliana] (TAIR:AT4G2	93.58	109	7	0	65	391	11	119	1e-42	169
MMN1.Contig_1231	GAACCACCAAATCGCCGCCATGTTGAGACAAGCTTCTCGCCTCCTCTCCCGATCCGTCGCCGCCGGAACCTCTAAATCGGCGACGGCTCGTGGCTTCTCAACGGAAGTTCCGTCGACGATCGATTCGACGTTCGTGGAGTCATGGAAGAAAGTCGCGCCGAACATGGACCCGCCACAGACTCCTTCTTCCTTCATGAAGCCTCGTCCGTCGACTGCCTCTTCGATTCCGACGAAGCTCACCGTCAATTTCGTGCTCCCTTACGCATCTGAGCTTTCCGGGAAAGAGGTCGACATGGTCATTATTCCCGCGACAACAGGACAAATGGGTGTTTTGCCTGGACACGTTCCAACAATCGCTGAGCTGAAACCTGGTATCATGTCCGTCCACGAAGGCACTGA…	757	1	AT5G47030.1	ATP synthase delta' chain, mitochondrial		Identical to ATP synthase subunit delta', mitochondrial precursor [Arabidopsis Thaliana] (GB:Q96252); similar to hydrogen-transporting ATP synthase [Brassica rapa] (GB:ABL97963.1); contains InterPro domain ATPase, F1 complex, delta/epsilon subunit; (Inter	88.18	203	24	0	20	628	1	203	6e-99	357
MMN1.Contig_1232	GAAAGAGAAAACTGCTCTAACGGAGAAGCTAAAGGTAACAGAGGCAGCCCGGAAAAGATTTGAAGAAGAGCTGAAACGGTATGCCACAGAGAATGTAACTCGTGAAGAACTCCGTAAGTCACTTGAGGATGAAATCAGGCGACTGACACAGACATTAGGGCAAACGCAAGAAGAGAAACGAGAGAAAGAAGATCAGATTTCTCGGTGTGAAGCTTACATTGATGGAATGGAATCCAAACTCCAAGCTTGCCAGCAATACATTCACACCCTCGAATCCTCGCTTCGAGATGAGATTTCAAGACATGCGCCTCTATACGGTGCCAATTTAGACTCTCTATCGATGAAAGAACTTGATACAATAGCTCGGATCCATGAGGAAGGGCTAAGGCAGATCCATGC…	713	1	AT2G25320.1			similar to meprin and TRAF homology domain-containing protein / MATH domain-containing protein [Arabidopsis thaliana] (TAIR:AT2G25330.1); similar to unnamed protein product [Vitis vinifera] (GB:CAO44257.1); similar to unknown [Populus trichocarpa] (GB:ABG	90.82	196	18	0	2	589	1478	1673	8e-71	263
MMN1.Contig_1233	TAATAATAAATTAATTTAATTAATAGGGTGTCGTTACTCCTCTGCTCTGCACCGCACAGCAGACGACGAGCAGCAGCAGTAGTCGAGTAGACGCAGAGAGAGAGCGCGCTCACTATACTCTCTCAGTTATCAGTAATATCTATTTACTACAGATATGATTATCTATCTACGAGCGCGCCACCCGACGACATTAGTCGCCTGCGGAGATATTGCGCGCTTATCTCGCGCGGGCGGGGCGGCGATTAGACGACACAACTCTAGCAACATCACGCTCTCCAGCAGTAAGCCTCGTAAACATATAAAATGCATCTCGCGCATATATCTAGATACTTATACTCTGTATTATTTCGTTTCGTCATTCCGTAGGAATATAAGCTCAGAACGCACATACCGCAGCAC…	1221	1	AT1G53140.1	dynamin family protein		similar to ARC5 (ACCUMULATION AND REPLICATION OF CHLOROPLAST 5), GTP binding / GTPase [Arabidopsis thaliana] (TAIR:AT3G19720.1); similar to ARC5 (ACCUMULATION AND REPLICATION OF CHLOROPLAST 5), GTP binding / GTPase [Arabidopsis thaliana] (TAIR:AT3G19720.2	27.08	48	35	0	293	436	566	613	2.4	30.4
MMN1.Contig_1234	GGATTTGTGGTTACTTGTTTCTAATCGAAAATGTAAAGAGAAAGGCCCAATTCCATCTTAGCCCAACTATACTTCTAGCCCAAACAAGATATCCTGCATAAGCAAAAGGAAACGTTACGTTAGTCGGCGAAGACTTTACAAAAGGTAATATGGAATAGGAGTAAAGTCGGTGATCATGTTATATATATAGAGGAGGTGATCAAGGTTCCGAGATTATCCGAGAGAGAGCAAGGGCAAAGAGAGAGAGAGATATATAACAAGAGATTAAGCAAACAAAGAGTTCGTGGGTTTTGTGTTAATCATTGGCTTGTAATCTCTATTGTTGTTCTTAAAGAAACACTTTTGT	346	1	AT1G70750.1			similar to unknown protein [Arabidopsis thaliana] (TAIR:AT5G16720.1); similar to unknown [Populus trichocarpa] (GB:ABK92464.1); similar to Os03g0259900 [Oryza sativa (japonica cultivar-group)] (GB:NP_001049616.1); contains InterPro domain Protein of unkno	20.31	64	51	0	94	285	455	518	0.33	30
MMN1.Contig_1235	GGGAGTTGAAGTTGAAGCCAACCCCTGGGGACAAGTTGTCGTCACTCTTACGCTCTACATAGAATCTATAAGAAGTAGTTGCCCACTCACTCATTCTCCTCAACAAACACAGAGTTTAAAATGAACGTCCTTGGGAAGAAACCGGGTCGGGTCGTGGACAAACCCACGAACCCGATGGTGACTCCTCTCCTCAACGATCTCTACCAATTCACCATGGCTTATGCTTACTGGAAAGCCGGCAAGCAATCCGAACGATCCGTGTTTGATTTGTATTTTCGTAAGAACCCATTTGGCGGAGAGTACACTATCTTCGCTGGGTTAGAGGAATGCATCAAGTTCCTCGCTAACTTCACTTTGACCGACGAAGAGATTGATTTCGTTCGTGACTCCTTGCCTGGC…	731	1	AT4G36940.1	nicotinate phosphoribosyltransferase		similar to nicotinate phosphoribosyltransferase family protein / NAPRTase family protein [Arabidopsis thaliana] (TAIR:AT2G23420.1); similar to unnamed protein product [Vitis vinifera] (GB:CAO71867.1); similar to B0222C05.1 [Oryza sativa (indica cultivar-g	95.72	187	8	0	133	693	10	196	7e-102	366
MMN1.Contig_1236	GAAGGAAGAACGAAGGCAAGAGATTGAGATGGAGGAGATCATCGTAAACGATTCAGAGATGTACGGAGCTCTTGTCACGGCGCAGTACGCACGGTTGCATCATCGTCACCACTGCAGAGAGAATCAGTGTACCTCTGTTCTCGTCAAATACATCAAAGCCCCTGTTCATCTCGTTTGGTCACTTGTCCGAAGATTTGATGAGCCGCAAAAATACAAACCGTTTGTAAGCAGATGTACAGTCCAAGGTCATCCTGAGATCGGTAGTCTCAGAGAAGTCAACGTTAAATCTGGTCTTCCGGCGACAACTAGCACCGAGAGATTGGAACAGCTTGATGATAATGAACGTATCCTAGGTATCAACATCATTGGTGGTGATCATAGACTTAAGAACTACTCTTC…	750	1	AT4G01026.1			similar to unknown protein [Arabidopsis thaliana] (TAIR:AT1G01360.1); similar to hypothetical protein [Arabidopsis suecica] (GB:BAF63139.1); contains domain SSF55961 (SSF55961)	89.07	183	20	0	50	598	10	192	1e-91	332
MMN1.Contig_1237	GGTCAAATTCAACATTCTCCGCGTCGTTTAGCTTCCGAGGAGGACAATCCGGTGGGAGAGAAAGAGAGAGCGAGCTTTGATTCAATCCTCCGATTATCGAAATTTTAACAAACAAGAAGAAGCAATGATTGGGTTGTTTAAAGTAAAGGAGAAGCAAAGAGAACAAGCTCAGAACGCTAGCCGAGGAGGAGGAGCTTCTGTCAAGAAACAATCTGCTGGTGAACTTCGTCTTCACAAAGATATATCAGAGTTGAACCTTCCTAGCTCGTGTACGATTTCGTTTCCTAATGGCAAAGATGATTTGATGAACTTTGGAGTATCCATTAAACCTGATGATGGTTACTACCACAATGGTACATTTCTTTTCACGTTCCAAGTGTCTTCTGTGTATCCACACGA…	750	1	no significant hit
MMN1.Contig_1238	GACAAAGTCTTGATCCCAATGGCCAAGAAGATATCGAAAAATGAAAAGGGTATTACCGTCATGACAAGAATGGGAATAGGTATGTTCCTATCCATCATTGCCATCGTTATAGCCGCGTTAGTCGAGAGAAAAAGACTAAAGATAAGCAAAGAGATGAAGACTTCACCAAACTCTTTAGAACCGTTGAGCATATTCTGGCTCTTACCTCAGTACATTCTATTGGGAATCTCGGACATTTTCACGGTTGTTGGGATGCAAGAGTTCTTCTATAGCGAGGTTCCTGTTAGAATGAGAACAATGGGGTTTGCTTTGTACACGAGTGTTTTTGGTGTGGGGAGCTTCGTGAGCGCTGCGTTGATATCGGTGATAGAGACTTACACGAAGTCAAGAGGTGGGGAA…	609	1	AT5G14940.1	proton-dependent oligopeptide transport (POT) family protein		similar to proton-dependent oligopeptide transport (POT) family protein [Arabidopsis thaliana] (TAIR:AT3G01350.1); similar to Os06g0239500 [Oryza sativa (japonica cultivar-group)] (GB:NP_001057261.1); similar to TGF-beta receptor, type I/II extracellular	88.28	145	17	1	1	435	369	512	8e-63	236
MMN1.Contig_1239	GGTAGCTTGGAAGCTTGTGAAATCGAATCGGAGAAAAGATGGCGGAAGAACACAAACACGACGAATCCGTGACGGCTCCGGAGCCGGCTGTGGAGATTGTGGAGAGGGAATCGTTGATGGACAAGATATCGGAGAAGATCCACCACGGTGGGCGATTCCTCTTCGTCGTCTTCGTCGTCTGATGACGATGACGACAAGAAGGAGAAGAAGACGAAGAAGCCGGAGTCTCCGTCTTCTATGAAATCGAAAGTCTACCGCTTGTTCGGAAGGGAGAAGCCTGTGCATAAGGTTCTCGGCGGTGGAAAGCCGGCGGATATATTCATGTGGAAGGATAAGAAGATGTCTGGTGGTGTACTTGGCGGTGCTACAGCCGCGTGGGTTCTGTTTGAGTTGATGGAG…	710	1	AT4G23630.1	BTI1 (VIRB2-INTERACTING PROTEIN 1)		similar to BTI2 (VIRB2-INTERACTING PROTEIN 2) [Arabidopsis thaliana] (TAIR:AT4G11220.1); similar to unknown [Populus trichocarpa] (GB:ABK93406.1); contains InterPro domain Reticulon; (InterPro:IPR003388)	94.77	153	8	0	250	708	70	222	3e-96	292
MMN1.Contig_124	GACATTCTCTAAGTTATATATAATTACTCTTTTCAGACTCTTTTCTTTCTCTTCTCATGGCGTCTGTTCAATATGGTTTGGATCAAGGCGTGGAGACTTTCAACGATGAGCTTATGATCATGTCGTTCTTAGAAGAAGAATCGCCAGCTGAAAATCATATCAGCGTTACCGAAGAGGAAGAAGAGAAACTAAACCGTGTGATTAGATCGTTAGAAGTGGAGATCAACATGAGTTCTCCGACCATAGAATCTCAAAAAACGGATCTGCAAGAGATCACAAAACCCGGTCTTGAAGATGATTTTGGGTGGCTTAACGACTTTGATATTGGCCTGGTTTCGTCGGAAAATGATGATGAGATGATGAAATGGTGTACGGAACTTTCTTACATGGATGGTGTGG…	670	4	AT3G14560.1	unknown protein			77.12	153	32	5	69	518	5	154	9e-61	229
MMN1.Contig_1240	AAGCAGTGGTATCAACGCAGAGTGGCCATTACGGCCGGGGGAACTGGAATGAGGAAGAGTGATGATGATGATGGTCGAGATCACAGACGAAACCATAATAATAAAATGTGATCTTATGAAGTAGAGGGAGACTTAGTAATTAATCTAAATAAGATGTTGCAGTGTGTGTCGTGTTTCTATGTGTTTGTTCCTTTTATCTTTGTGAGCTAAACGCTGTTACGTGCCTGAATAAATATATTTCCACCACCTGGTTTAGGTGTTTTACGGTT	269	1	no significant hit
MMN1.Contig_1241	GGTTGTTACGCCATTCTCTCTCTCTCTCGATCAGATCATATACACGGAGTGAAGCAGGATGGGATTGTCGTTCGCGAAGCTTTTTAGCAGGCTTTTTGCCAAGAAGGAGATGAGGATTCTCATGGTTGGTCTTGATGCTGCTGGTAAGACCACCATTTTGTACAAGCTCAAGCTCGGTGAGATTGTCACCACCATTCCCACCATTGGGTTCAATTTTGAAACTGTGGAGTACAAGAACATCAGCTTCACTGTCTGGGATGTCGGGGGTCAAGACAAGATTCGTCCATTGTGGAGGCACTACTTCCAGAACACTCAAGGTCTCATCTTTGTGGTGGACAGCAATGACAGAGACCGTGTTGTTGAGGCTAGAGATGAATTGCACAGAATGCTTAATGAGGA…	733	1	AT1G70490.2	ATARFA1D	A member of ARF GTPase family. A thaliana has 21 members of this family, known to be essential for vesicle coating and uncoating and functions in GTP-binding. Gene encoding ADP-ribosylation factor and similar to other ARFs and ARF-like proteins. The gene	Identical to ADP-ribosylation factor 2 (ARF2-B) [Arabidopsis Thaliana] (GB:Q9SRC3;GB:Q9S9K6;GB:Q9SGY6); similar to ATARF/ATARF1/ATARFA1A (ADP-RIBOSYLATION FACTOR 1), GTP binding / phospholipase activator/ protein binding [Arabidopsis thaliana] (TAIR:AT1G	99.45	181	1	0	59	601	1	181	4e-101	363
MMN1.Contig_1242	GAGGGTGAATTCTCAGAGGCACGTGAAGACTTGGCGGCACTGGAGAAAGATTATGAAGAAGTGGGTGCTGAAGGTGGAGACGATGAGGAAGATGAAGGTGAAGAGTATTGACACCTTCTTCTCCCAATCAATGTGCAACTAAAAACTTTTTTCAAATTAATGTTTCTACTTGTGATTCTTGTGGATTACATGTTTCTTTTCAATCTTGTACAATATTCGTTGCATTTTCTTAGTCCTGTGTTTTTTTTATTTTGGTTCAATTCGTTGGTAAAGCGACCATTGAAAAA	287	1	AT4G14960.1	TUA6 (tubulin alpha-6 chiain)	Encodes an alpha-tubulin isoform required for right handed helical growth.	Identical to Tubulin alpha-6 chain (TUBA6) [Arabidopsis Thaliana] (GB:P29511); similar to TUA2 (tubulin alpha-2 chain) [Arabidopsis thaliana] (TAIR:AT1G50010.1); similar to TUA5 (tubulin alpha-5) [Arabidopsis thaliana] (TAIR:AT5G19780.1); similar to TUA4	60.61	33	13	0	8	106	389	421	4e-05	43.1
MMN1.Contig_1243	GAAGACACATCAAAAAAACGAACGACATGGGCCATTAACGAGAAAGAGAACCCACCATGCTACTCTCAACCGGAGACGATGAACCGGACCTGGTCGTGGGACAAAATCTACCAACGGACGCAGCCACTCCATGGGTGCTGACTATCATCTCCCACGAGATGGAGAAGCTAGTCGCTGGGAAAGATTGGTTAGCTTATCAAACTAAGGGATGCCGGAAGAGTTTGGAGGCGTTTCACGCGGTCACATCACCGAGCGTAACTATAGCCAAGTACCTTCAGAGGATATATAAGTACACAAAAGGTCGCCCGTCTTGTTTCGTGGTCGGTTATGCGTACTTAGACCGGCTGGGTCATAAACATCCTGGTTCTCTGGTAGTTTCCATGAATGTTAAGATACTCC…	754	1	AT3G21870.1	CYCP2;1 (cyclin p2;1); cyclin-dependent protein kinase		Identical to Cyclin-U1-1 (CYCU1-1) [Arabidopsis Thaliana] (GB:Q9LJ45); similar to CYCP4,1 (cyclin p4,1), cyclin-dependent protein kinase [Arabidopsis thaliana] (TAIR:AT2G44740.1); similar to unnamed protein product [Vitis vinifera] (GB:CAO24164.1); conta	52	25	12	0	532	606	158	182	5e-48	26.9
MMN1.Contig_1244	GAGATAAGCACAAACAAAACAATCTTCTAACTTAATCTTCTGTCTTGTTTCGCAAGTGTTCCCTCTAATGGCGAAAGAGAAAAACGAGACTCCAACGGTGAAGAAGACTCCTATGGCGTCAAAAGAGAAACCAAAGAAGCTTAATAAACCCAAAACCACCACTCATCCTCCATATTTCCAGATGATAAAAGAGGCTTTGATGAATCTGAAAGAGAAGAACGGGTCGAGCCCTTACGCTATAGCAAAGCAGATAGAGGAGAAATACAAACCTCTACTCCCTGAGAATTTCCGTAAAACACTTTCGCTGCAGCTTAAAAACTCTGTAGCTAAAGGTAAGCTCGTGAAGATCAGAGCCTCGTACAAGCTTTCAGAGACCACCACGAGGACAACGAGACAGCA…	559	1	AT2G18050.1	HIS1-3 (HISTONE H1-3); DNA binding	encodes a structurally divergent linker histone whose gene expression is induced by dehydration and ABA.	similar to histone H1, putative [Arabidopsis thaliana] (TAIR:AT1G06760.1); similar to histone H1.2 [Arabidopsis thaliana] (TAIR:AT2G30620.1); similar to unnamed protein product [Vitis vinifera] (GB:CAO48240.1); contains InterPro domain Winged helix repres	91.04	67	6	0	173	373	27	93	2e-27	119
MMN1.Contig_1245	TGTAAAATTTGGACTCTAGTCTTTGTAATATTTGGTTCACGGATGATCTACTTATCTATTTAAAGTGTTGTTGTTCGATTATGAAGAATCACACAATCGC	100	1	no significant hit
MMN1.Contig_1246	AAGGAGCCTATGTATACTTTGATTTCCAAACCCCAAAAGACGAGAATCGAGATGGAGGATGGGTTCAAAGGATCAAAAACGAGTTCACGTTTGAATACAGTTATCTTGAAGATGAACTCGCCGTATAGATAAGAGAGGGAGAGAGATATGTTTTCTATGTATATTCTCTCGCAAGTGTTATTTCCTGAGTTTGTACTCATTTCTTTTCAGTACCTTTTTAATTACAGAAGCATAAACATTGACT	244	1	no significant hit
MMN1.Contig_1247	GGTAGCGATCAAGAGAGACTAAGGCAGACATGTGAGAGAGGAAAGGATCCTATATACAAATTTAATCTAAGATCTCTGCTTCCTCCTCATATATATACTGCATATACACACATAGTTCCCCTATATCGAAGATAGTAGAAATCAACCAAGAAAGCTCAATACGAAAGGAAGAGGCTTATAATATCAAGCATAGAAGAATGGATCCGAGGGAAAAGAAGAGAGGTTCTTTGAAAGAGAAGTTTCAATTGCTTCGTTCAATCACTAATTCTCATGCTGAAAACGATACATCGATCATAATGGATGCTTCTAAATATATC	317	1	AT2G40435.1	transcription regulator		similar to transcription regulator [Arabidopsis thaliana] (TAIR:AT3G56220.1); similar to unnamed protein product [Vitis vinifera] (GB:CAO41465.1); contains InterPro domain Helix-loop-helix DNA-binding; (InterPro:IPR011598)	90	40	4	0	198	317	1	40	8e-14	72
MMN1.Contig_1248	GATTTGAAGAGAGGAGGTAACTTCAGGTTCCAGAAGACTGCTGCTTATGGGCATTTTGGGCGTGATGATCCTGATTTCACTTGGGAGGTGGTGAAGCCACTCAAGCCAAAGGCTTAAACAAGAAGGTGGTTGTTGCAAGAACTCTTGAGTTGCTGAGACACTCTGTCTCTCTCTCTCTCCCTCTCCACTATTGGGGACTTATCCATTATTATACCATTGTTATTGGGAAAGATTTGAATAATGCTATACATTTTACATTTTGTTTTTGCTGCTATTGGAGTTCGAACACAAGGCCCATGTGTGTTAGTGAACGAACAGAAGATTTGAGTTTTATGTTTTTGAATTTCCTGTTTTTTTTTCCTTTCTTCTTATGCTCTTGTATTGTAAGTTTGATTGTGT…	435	1	AT2G36880.2	MAT3 (METHIONINE ADENOSYLTRANSFERASE 3)		similar to MAT2/SAM-2 (S-adenosylmethionine synthetase 2), methionine adenosyltransferase [Arabidopsis thaliana] (TAIR:AT4G01850.1); similar to MTO3 (S-adenosylmethionine synthase 3), methionine adenosyltransferase [Arabidopsis thaliana] (TAIR:AT3G17390.1	100	38	0	0	1	114	353	390	5e-18	86.7
MMN1.Contig_1249	GATGGATAATAAGCTAAACAGCTCTTCGCAGCAAATGGAGCCTGCAGAGGTTAAGGAGTGTACTACTGATCACAACTCGGTTGTAGATGACGGATCTGGATCCCATTCATCTTCTGGTCAAAGGAAGAAGCTAAGCACAACACCTCCTTCTCACAAAACTCGTGGTGGTGGTGGTGGCGTGAATTACACTGTTCCAAAGCCATTCTCTCTGTCGGCTGAAAAGCCTGCTGCTTCCTCTGTCTGCGCAAGAGCAGGAGTTGATAGTCATAATAGCTCACCGGGAAATGCTGCTAGCCGCAACTCTTCTTCTGGATCAAGAGGTTCACAGCCAAACTCGGCTATGCCAGCGAGGAAGACAATAGATCACAAGAAGCACCATGATGATGAAGATACTTTTTC…	753	1	AT1G54460.1			similar to WDL1 (WVD2-LIKE 1) [Arabidopsis thaliana] (TAIR:AT3G04630.2); similar to WDL1 (WVD2-LIKE 1) [Arabidopsis thaliana] (TAIR:AT3G04630.3); similar to unknown [Populus trichocarpa] (GB:ABK95727.1); contains InterPro domain Targeting for Xklp2 (Inter	60.8	250	97	6	5	751	27	258	3e-40	162
MMN1.Contig_125	GATCCGTAACTTTTTCTCCATTGATTTTCTCTCTCAATTCAAATCARAATCAAAGCAAAAAAAATGTTGGCTGTGTTCGAGAAGACCGTGGCGAACAGCCCCGATGCACTGCAGAGYCCTCACTCCGATTCGCCTTCGTACGCCTTGAAAGAAGGATATCTGGCGAGTCAATTCGTTTCCAAAAACTCGAACTCCGTCACGCTYAACCTCGGATCGTCGGGAGTGCTCGCTTACTCTCTCGATAACACCGATCATCTTGTTCACAGATTGTTTGCGGTKGTGGATGACATCTTCTGCATMTTCCGAGGACACATTGAGAAYCTYCCGTTTCTGAGGCAGCARTATGGRCTGAGCAAAGTCACRAACGAGGCCATCATGGTCATTGAGGCTTWCAGGACT…	708	2	AT5G43830.1			similar to unknown protein [Arabidopsis thaliana] (TAIR:AT3G22850.1); similar to aluminum-induced protein-like protein [Thellungiella halophila] (GB:AAM19711.1); contains domain G3DSA:3.60.20.10 (G3DSA:3.60.20.10); contains domain SSF56235 (SSF56235)	79.53	215	44	0	64	708	1	215	9e-99	356
MMN1.Contig_1250	GAGAGATCAGACATATATGTTCTTCGCCGTTATCGCTCTCGTGCTCTCGTATCTGATTCTCCCCACCTCTTCCTCTCCACCTCCTTCTTTCCTCCTCCTGCACCTCTGTACGCTGTCTCTTGGCCGTTCAAACTGTCTTCTTGCTTCACTCTACCTTATCATACGAGTACATTCTCTTCTTTCTCGTCTAACCCAATACGTGTTCCTTACTCTATGGCCACCATGATGCTGAGTTTTTACATTTTAGATTCCATTTGCTAAGTCATCCACATATACAAACAAGCAATCTCCTGTGGGTCCGATTCTCCCCTTCAGACTTCTTCCACATCCTCCACTGGCGGTACGGGTCCAAGGAGGATCTGAACGTGTACGTCGCTCTTTCCTATCACATCCGCGTCA…	749	1	AT2G31670.1			similar to unknown protein [Arabidopsis thaliana] (TAIR:AT1G51360.1); similar to unknown [Populus trichocarpa] (GB:ABK93857.1); contains InterPro domain Dimeric alpha-beta barrel (InterPro:IPR011008); contains InterPro domain Stress responsive alpha-beta	44.9	147	81	1	270	710	84	229	2e-26	115
MMN1.Contig_1251	GAATCTTGACACTCCACCCACACCGCCACTGCTCTCGATCGCATCATTCATCGTACATCTATTCATACAAATCTCTCCTTTTTCCTTCTTTTTTATTACCTCACTCATCATTTCTGCGCCACCGGATACAACTCCTCCCCTAATGAATGGGTCCGCACTCGCTCACATGCGCTTTCTCTCTAGTCTCCTATTCGCCATCTAACCCCTTCGTATAACCTTATTCCACCCGCTCTTTCTTACGACAGTTGCTGCTTGACTCATAGCCAACACGTCTATCACATCTTGATCAACTTCGGGTGCTCTCCATGGTCTCATAAGAAAATGAATCACCTGCACAGCCTCCGGGGTTGCCCATCTTTCTCTATGACGATACCAACGACTATCTCTGGCTTAAAACTA…	728	1	AT1G08110.4	lactoylglutathione lyase, putative / glyoxalase I, putative		Identical to Lactoylglutathione lyase [Arabidopsis Thaliana] (GB:Q8H0V3;GB:Q9LMZ7); similar to lactoylglutathione lyase, putative / glyoxalase I, putative [Arabidopsis thaliana] (TAIR:AT1G67280.1); similar to lactoylglutathione lyase, putative / glyoxala	46.88	192	102	2	147	722	1	189	5e-36	147
MMN1.Contig_1252	GAGAAAGAAGACGGTGAAAGATGTCGAGCGGAGGATACGGAGACCCGTCGCAGAAGATTGACTACGTCTTCAAGCTAGTCCTGATCGGAGACTCCGGAGTCGGGAAGTCTCAGATACTCTCCCGTTACGCGAGAAACGAGTTCAGCTTGGACTCCAAAGCCACCATCGGCGTCGAGTTCCAAACTCGAACGCTCGTGATGGACCACAAGAGCGTCAAGGCTCAGATCTGGGACACCGCGGGCCAAGAACGGTATAGAGCGGTGACGAGTGCTTACTACAGAGGAGCGGTTGGTGCGATGCTTGTATACGACGTGACGCGGCGTCAGACGTTCGATCACATCCCGCGGTGGCTG	353	1	AT5G65270.1	AtRABA4a (Arabidopsis Rab GTPase homolog A4a); GTP binding		similar to ATGB3/ATRAB11G/ATRABA4B (GTP-BINDING PROTEIN 3), GTP binding [Arabidopsis thaliana] (TAIR:AT4G39990.1); similar to 80A08_30 [Brassica rapa subsp. pekinensis] (GB:AAZ67615.1); contains InterPro domain Rab11-related (InterPro:IPR015595); contains	93.64	110	7	0	24	353	3	112	2e-56	213
MMN1.Contig_1253	CACGGAAACTTGAACAAGAATCGAAGATAATTGAAGAGGATCGGCGAGCTGTTGAGAAGTATCAGGAAACGACAAAAAACATGAGAAAGGAGATTGAGGACCTTAGGACAAATGCCAGAATATTTCAACTAAGCAAGTGCACTGCTTGCACTTTCACATTGGATATCCCTGCAGTCCATTTTATGTGTATGCACTCATTCCATCAACGTTGCCTTGGTGACAACGAAACAGAATGTCCCGAGTGTACTCCCGAGTACAGATCCGTGGTAGAAATGAAGAGAAGTTTGGAGCAGAACTCGAAAGACCAAGCTCTGTTCTTCCAGCAGGTAAAGAGCTCGAAAGACGGGTTTTCTGTAATTGCAGAGTATTTTGGGAAAGGAATCATCAGCAAAACTAGTG…	686	1	AT2G05170.1	ATVPS11 (Arabidopsis thaliana vacuolar protein sorting 11); transporter	Homologous to yeast VPS11. Forms a complex with VCL1 and AtVPS33. Involved in vacuolar biogenesis.	similar to hypothetical protein OsJ_013975 [Oryza sativa (japonica cultivar-group)] (GB:EAZ30492.1); similar to hypothetical protein OsI_015087 [Oryza sativa (indica cultivar-group)] (GB:EAY93854.1); similar to unnamed protein product [Vitis vinifera] (GB	94.12	136	8	0	3	410	797	932	2e-70	261
MMN1.Contig_1254	GATACACATCATCTCCTCTCTCTTCTCTTATCTTCTCCGCTATGAAGCTCGCCACTAGCCTCAGCTCCAAGTTCCTCCGCCTCAGCCCTAAACGTATCTTCCGCCCCAAGTCCAAGTCCTCCTCCGTCTCCAGATCCGAACCTTCTTCCTTCAGCTCCGGTGCTTCATCCGACGGCTCCTACAGCGACCTCAAGCCAGGTCCCGCCGCCACTCCCGTCAGTGTCCTCCCCGGAGAACAAGATTTTTACTCCGAGCTGATACAGGCCTTTAAGCTCATAGACCGCGACGACAACGGTGTGGTTTCAAGAAAAGAACTAGCTGCGCTGCTTAGCGGGCTCAGTCCTGAACCTCCTAGTCAAGAAGATGCTACTCTGATGCTTCAAGAAGTCGATGGAGGAG…	728	1	AT2G41410.1	calmodulin, putative		Identical to Calmodulin-like protein 1 [Arabidopsis Thaliana] (GB:P30188;GB:Q8LFR1;GB:Q9SLG7); similar to calmodulin, putative [Arabidopsis thaliana] (TAIR:AT3G10190.1); similar to unnamed protein product [Vitis vinifera] (GB:CAO23336.1); contains InterPr	60.36	222	85	4	42	698	1	215	2e-59	225
MMN1.Contig_1255	AGAAACTAACAAGGATTCCCTTAGTAACGGCGAGCGAACCGGGAAGAGCCCAGCTTGAAAATCGAACGTCTTCGGCGTTCGGATTGTAGTCTGGAGAAGCGTCCTCAGCGACGGACCGGGCCCAAGTTCCCTGGAAAGGGGCGCCAGAGAGGGTGAGAGCGGCGTCGTGCCCCGGACCCTGTCGCACCACGAGGCGCTGTCTACGAGTCAGGTTGTTTGGCAAAGATATCGCACTCGGGAGCGTTGGTGTGTCTGGACGATACGTATGGGCAATATGGTGATAGCGCTACTTGTACCGAGAGGGGCTCAACACTATAAAAGAAAATTAAAAAAAAAAACATGT	343	1	AT2G21800.1			similar to unknown protein [Arabidopsis thaliana] (TAIR:AT2G22140.1); similar to unnamed protein product [Vitis vinifera] (GB:CAO71735.1)	38.46	39	24	0	23	139	68	106	0.2	30.8
MMN1.Contig_1256	GGATCACAAAACCATCAAAGCTTAGAAATCTGACAAGACAAAAAGAAAAATATTTATTTTGATCTTTACAGAGAAACGAATGGAAGGTTTGATTCCATTCTTGTACAAAGCCTTTGTTATGTATAAAAGAGAAAGACGCTTCTCGTCAGTTTTGTTCAGCGATCATCACTCTCCTTCTACCGCCGGTTATTACACGCGACTTCTCGAAGATTCCCCAGCTAGTTCTGGACCGTCAGATCTCAGGCTACTGGGACCAAACCGTCTTGCAATGTTGGAAACGAAGTCGTCTCCCAGCACCAAGTTTCTGCATGAATGATGATATATTACATATTTCCGCATATATATTTGGTTTGCATGGCATTGTGTTAATTGTATACAGACTGTTATTATATTTCTAAG…	414	1	AT5G02090.1			similar to unknown protein 1 [Brassica juncea] (GB:AAW23957.1)	68.92	74	21	1	80	295	1	74	3e-20	94
MMN1.Contig_1257	ATGGACAAGAAAGAGAAGGAGAAGAAGATCAAGCCCCGACAGACCAGACCCAGGTGCAGACAGATGCAGAGGCAATGCAAGAAGCTCTGTTCTGAAGAATAATGATCTCTCAAAAAACAGCCTAGACATTAGCCTTGGTGTGTGTGGTTTAGGAGTGTTCTTTTTAGTATTTAGGTGTTGGATCCTCCTATCTTTAATTAAAAACCTATAAGGAATTTTAGTCTTTTGGAAGAAAAAAAAACAAAGACTCTTTTGATGGTGTTTGTGTCAGTGTGTCACTAACTAAAACATTAAGAAGGTTGATGTAAATCAGGAGTTATTTCCAGTGTTGAATGTTTTTCCCTCTTAT	349	1	AT3G18035.1	HON4; DNA binding	A linker histone like protein	similar to HON5 (HIGH MOBILITY GROUP FAMILY A 5), DNA binding [Arabidopsis thaliana] (TAIR:AT1G48620.1); similar to DNA-binding protein (GB:AAA50196.1); contains InterPro domain Winged helix repressor DNA-binding (InterPro:IPR011991); contains InterPro do	66.67	30	10	1	3	92	459	480	0.005	36.2
MMN1.Contig_1258	GATTTACAAACCCTTAAACCTCGTCGTTTCACTAGGCGTACAAATCACAAACACGTACACCTCATCCCTCTCTCTCTCTACTTTCAAACCCTACGAATCTTCTTCCGTCAAAGAATCAAAGCATGAAGGGAGGCAAATCAAAGGCCGATACCAAGAGCTCCAAGCTGGCGGTGAACAAGAAGCCAAGCAAAGCGGCTGCTAAGGATCCAAACAAACCTAAGAGGCCTTCCAGTGCCTTCTTCGTTTTCATGGAGGATTTCCGTCAGACTTACAAGAAGGATCATCCCACTAACAAATCTGTTGCTGCTGTTGGGAAAGCTGGTGGACACAAGTGGAAATCCTTGTCTGACACTGAGAAGGCTCCCTACGTTGCTAAGGCTGACAACCGCAAAGTTGAGT…	710	1	AT1G20696.3	HMGB3 (HIGH MOBILITY GROUP B 3)	Encodes a protein belonging to the subgroup of HMGB (high mobility group B) proteins that have a distinctive DNA-binding motif, the HMG-box domain. The motif confers non-sequence specific interaction with linear DNA and structure-specific binding to dist	similar to HMGB2 (HIGH MOBILITY GROUP B 2) [Arabidopsis thaliana] (TAIR:AT1G20693.2); similar to HMGB2 (HIGH MOBILITY GROUP B 2), transcription factor [Arabidopsis thaliana] (TAIR:AT1G20693.1); similar to HMGB2 (HIGH MOBILITY GROUP B 2) [Arabidopsis thali	82.69	104	15	1	123	425	1	104	3e-44	175
MMN1.Contig_1259	CAACAATGTAATTTCAAGCTCGCCCGGTACACCGCCGACAATCAGAGGTGATCACTGTGATCTCGGCACCCGGTTTCTTATGGCTTCATCACCTATGACGTCATTCGCTGCTCCATCAACTAATCTTCTTGCGGACTAAAAGCACCATCACTTGATCGACGGTCTCGACGCCACCGTCACGCACACACATCACCCTCGATAATCTCCAGCTCAACTCCAAGGATCTTTAGGTTCATGCTCATGCACTCTCCTAAATAATCTTCCTCACTACGCCTGTGGTACTCTCTCGACACTTCATGCCTAACCTCCTCTTTGAACATGAACCGGTTTACTACTTTGCCATCCTAATAAAAAAATTCGAAAACAAAAATCTCAACTATGTCTCTA	387	1	AT5G11090.1	serine-rich protein-related		similar to serine-rich protein-related [Arabidopsis thaliana] (TAIR:AT5G25280.1); similar to serine-rich protein-related [Arabidopsis thaliana] (TAIR:AT5G25280.2); similar to serine-rich protein [Brassica rapa] (GB:ABL97972.1)	31.11	45	31	1	83	217	41	77	2.8	27.3
MMN1.Contig_126	GACACCATCCTCTTTCTCTCTACACTGTCTCGAACTATCCGTCAAAAACCATGTCTGCCTTCACCAGCAAATTCGCCGATGAGTTGATCGCTAACGCCGCATACATCGGCACACCCGGAAAGGGTATTCTCGCCGCCGATGAGTCAACCGGAACCATCGGGAAGCGTCTTGCCAGCATCAACGTCGAGAACGTTGAGACYAACAGACGTGCTCTCCGTGAGCTTCTCTTCACCGCYCCYGGTGCTCTCCCTTGCCTCAGCGGTGTCATCCTCTTCGARGARACTCTYTACCAAAAGAGCTCCGATGGYAAGCTTTTCGTTGATATCTTGAAGGAAGGAGGAGTMCTCCCAGGTATCAAAGTCGACAAGGGTACMGTYGAGYTAGCCGGAACCAACGGCG…	943	2	AT3G52930.1	fructose-bisphosphate aldolase, putative		similar to fructose-bisphosphate aldolase, putative [Arabidopsis thaliana] (TAIR:AT2G36460.1); similar to unknown [Populus trichocarpa x Populus deltoides] (GB:ABK96406.1); contains InterPro domain Aldolase-type TIM barrel; (InterPro:IPR013785); contains	95.96	297	12	0	51	941	1	297	4e-160	560
MMN1.Contig_1260	CGGGGGAGAGAAGAAAACAAGAGAATCAGAATGGAAAAGAGATCTTGGGCGTCGGCTCTGCAGATCCTTCGGACTGTTTGGATAAAGATGTGATTCATCCGACACTAACGAGTCACCCCAGCGTATGCCCCATCAGGAGAAAAAATGTGGGTACAAAGCAGACGCGTCGCAGGCGGCCGAGAAAACAAACCTCCCCATCTCCCCCTGTAGCCCCGCCGCTTCCTAAGGGAACGGTGAAGATGAGCCCCAACAACAACAACAACAACAACGTAGTCGTTGGTCAGGTTAGAATCCTGAAGCGCGGCGAGGGGATCCCTAAGAAGACAGCAGATCTGGTCGTAGAAAAGACAGATCTTGTGTCTACTCGTAGGATCGGACCAGATCCAGGATCGATGCCAA…	711	1	AT4G32020.1			similar to unknown protein [Arabidopsis thaliana] (TAIR:AT2G25250.1); similar to unknown [Populus trichocarpa] (GB:ABK93361.1)	48.44	192	85	3	45	578	1	178	5e-35	144
MMN1.Contig_1261	GACAAACATTTTATAAAAGATCACACAAAAAAAATGATGGCTAACAATCAAGCATCTGTTATGGTTAACAAAGTGAAACCACACAAGGATTCATGGAAAGTGCACGTCAAGCTACTCCATTCATGGACTTAAAACACAACTTATGGAGGGGAGACTCTAGAATGTGTCCTTGCTGATCAAACGGGCGGTAAAATACATGCAAGTTGCAAAAGAACTCAGATGTTTCGTCTTCAACGAAGTCTCCCGCTTGGTGAATGGAGATTCATTGAAAACTTCAAGGTTTCAGCTTCTGGTGGTAAATATCGCCCAACGCCGCTACCTTACAAAATAACTTTCACGAGTGACACACTGATAGGGAAGTCAGTGTTTGAGGACGATGATCCTTATCTTAATCTTGTG…	597	1	AT1G52950.1	replication protein-related		similar to unknown protein [Arabidopsis thaliana] (TAIR:AT2G05642.1); similar to hypothetical protein 31.t00031 [Brassica oleracea] (GB:ABD65118.1); contains InterPro domain Replication factor-A, C-terminal (InterPro:IPR013955); contains InterPro domain P	36.3	135	86	0	64	468	10	144	7e-22	100
MMN1.Contig_1262	GGAGAACAGAGAGACAGCAAAAATGTATTTCGCAGCTATAGCTTCTTCACGACAAAGCTTTCTATCAAACACTTTCAGTTTCCAAGACAGTTTCAAATTCAAACACAGTAATAAACTCACTCGTCCTAAGTCAATCTGTTGTAAATCTCCACACCACAACGACGAAGAAACAGATTCTTCCCGGAAAAATGAGAATCAGCTGGCTAAATTGGCAATCGCGACGTTAGCGGTTGGCGTTTTGGCTTTGGGATCAGTTGGAGATGCGTCTGCGGCTAAGAGCGGCGGAAGAATCGGTGGTCAAGCGTTTCGGTCTTCAGCTCCTCGGCCTCCTCCTAGGATAAACAACCGATCGAGGACCAACATCTACGTGAATCCTCAGGTTGCACCACCTTTAATCGG…	741	1	AT5G57345.1			similar to unknown [Populus trichocarpa x Populus deltoides] (GB:ABK96592.1)	88.46	182	21	2	23	568	1	180	6e-48	187
MMN1.Contig_1263	GAACCAAAGTGAAACACGAAGAAGAGAAGAAGCAGACGCAAAAATGGCGACTCTTTCATCATCCTCTCTATTATCTTCTTCTCCTTCTCCTCTATGCAAATCGAGATTCTCTCCATCGAGAACTGACTTCATCTCTTTCTCCCCTCGGAAAGCTCTCTCCTCATCCACCTCGCCGGCGATTCTCTCTCTCTCCGTAAAACACAATCGCCAGAGAAACTCTTTCAAAGTGAAATCAGTAGCTAGTCCCGCGGAGACGGCGTCGGAGTTCGATGAGATGGTCTCCGGGACGAAGAGAAAGTATTATATGTTAGGAGGGAAAGGAGGAGTGGGGAAAACTAGCTGCGCAGCTTCTTTGGCTGTGAGGTTTGCTAACAATGGTCACCCAACTCTTGTTGTCTC…	736	1	AT3G10350.1	anion-transporting ATPase family protein		similar to anion-transporting ATPase family protein [Arabidopsis thaliana] (TAIR:AT5G60730.1); similar to unknown [Populus trichocarpa] (GB:ABK95489.1); contains InterPro domain Anion-transporting ATPase; (InterPro:IPR003348)	85.71	14	2	0	690	731	220	233	9e-81	30.4
MMN1.Contig_1264	GATTGCCAAACAAACTCGAAAAGAAAGAAGAGGAGAGAAAAAGAGATGGCTTCTACCTCCGCCGTGTCATTGTTCATGCCGCTCACCCAAAAGCGATCGACGGCATCAATAAAAACTGTAGTCTTACGCATGACGCTATTGCCTCAGAGGACATTAAATGCGGGATGCTCCTACTTAGCCGTGTATTCTCGGAAGTATGGAGAGGAGGCGTTTAACCTCTAAGATAGGACTTTCGATGTGAGTGGTTTGGCAGCTGCAGCTCTCACCGTTTCAATGGTGATCCCTGAGGTGGCTGAAGCCGATATGGTCAAGGAGCTGTGCCTCTCTCAAGAACTTCTTGCTAAGCATTGCCTCGGGAGGAGGGGTGCTCACGGTCAGTATCGGTGTGGTAGTTGGTGT…	561	1	AT2G06520.1	PSBX (photosystem II subunit X)	Encodes a protein with sequence similarity to the spinach photosystem II subunit PsbX.	similar to unknown [Populus trichocarpa x Populus deltoides] (GB:ABK96439.1); similar to unknown [Populus trichocarpa] (GB:ABK94669.1); contains InterPro domain Photosystem II protein PsbX; (InterPro:IPR009518)	40.91	88	49	3	46	300	1	74	3e-09	47
MMN1.Contig_1265	GACAAATCGATAAACCAATCATTCTCAATTCTATAGCTCTCTGCTCTCTCTCGTGAATTTACGAATCAAAGATGCAGATCTTCTTTAAGACTCTCACCGGAAACACCATCACCCTTGAGGTGGAAAGCTCCGACACCGTCGACGACTCTAAAGCCAAGATTCAGGACAAGGAGGGAATCCCCCCGGATCAGCAAAGGCTTATCTGCGCCGGAAAGCAACTCGAGGATGGACGTACTCTCGCTGATTACAACATCCAGAAGGAGTCGACCCTTCATCTCGTCCTCAGGCTCCGTGGTGGTATGCAGATCTTCGTTAAGACTCTTACTGGAAAGACGATCACACTCGAGGTGGAGAGCTCCGACACCATCGACAACGTTAAAGCTAAGATCCAAGACAAGG…	691	1	AT5G03240.3	UBQ3 (POLYUBIQUITIN 3); protein binding	encodes ubiquitin that is attached to proteins destined for degradation. UBQ3 is most homologous with UBQ4, and is expressed in higher levels in vegetative tissue but lower levels in flowers than UBQ4. UBQ3 encodes different number of ubiquitins in differ	similar to UBQ4 (ubiquitin 4), protein binding [Arabidopsis thaliana] (TAIR:AT5G20620.1); similar to polyubiquitin [Thlaspi caerulescens] (GB:AAY86773.1); contains InterPro domain Ubiquitin; (InterPro:IPR000626)	95.1	204	10	0	72	683	77	280	5e-105	377
MMN1.Contig_1266	TATTGATAATAGCTAGCAGGATTATGAAACATGACTATAGCTTTTATGTTGGCTGTGTTTGCATTAAGTATTACTTCATTAATCTTACTGACTAGTGTACCCGTTGTATTTGCATCTCCCGATGGGAGGTCGAGTAACAAAGATGTCGAATTGTCTGGTACATCTTTATGGATAGGATTAGTCTTCTTGGGGGGTATGCTTAATTCTCTTATCAATTTGAATTCATTCGTTGAAGATTGAAAAATGAGATGACCACGCACATTCCAAGAATTACACATGCTGATTCTATATAAGTGGTTATAATGTATGCATGGAAACACACAAATTAAAAACAAGAGGTGGCGACCTATTCGCCTTCAAAAATCTTTATAGACCATTCGAGTGGTGAGTGGGCCCAAT…	513	1	ATCG00300.1		encodes PsbZ, which is a subunit of photosystem II. In Chlamydomonas, this protein has been shown to be essential in the interaction between PS II and the light harvesting complex II.	Identical to Photosystem II reaction center protein Z (psbZ) [Arabidopsis Thaliana] (GB:P56790); similar to photosystem II protein Z [Astragalus douglasii] (GB:ABY52010.1); similar to hypothetical protein LomaCp017 [Lobularia maritima] (GB:YP_001123722.1	82.26	62	11	0	31	216	1	62	9e-16	79.7
MMN1.Contig_1267	GAAATCTCTATCTCTCCTCTCCGAATGTCGCCAGAGAGAGAGCAAGCTTAAAAATCTTCTCTCATGGAGTCGCTCACATCATCAAACCCTTCCTTCTCTTATTTCTCGAAAAGCTTATCTCTTTACCCTTCTTCTCCTCTCTCCTTCGTTAAGCTCCCTCCTTCTATCCCCAACAACAACACCATCTCCTTATGCTGCAAACCATCCTCGAACCCTCAACCTGATAGCGCCCATGCAAAGCTCAACCCTTTACGCGCAATCGTCCGAACGTTTAAAGGTCTGGTCTCATCCCACTCCCGGCAATGGACGGCGCGTTTCCGAGCTTACAGGGACGATACGGTGGCTTTTTCGGAGCATTTCTTACCCGGAGAAGATTTGAAGCGGAACGGTGGAGTGGTG…	732	1	AT3G61770.1			similar to unknown protein [Arabidopsis thaliana] (TAIR:AT1G67600.1); similar to unnamed protein product [Vitis vinifera] (GB:CAO14376.1); contains InterPro domain Acid phosphatase/vanadium-dependent haloperoxidase related (InterPro:IPR003832)	64.06	128	41	5	172	540	38	162	7e-35	144
MMN1.Contig_1268	AGGCTATTCATTTAATTTTATATTTCTATTAATTACTAATAAGGTGTGTCGTCTGCTCCGCCCGCACGCCGCAGACAGACACGAGCTGCACGCGACGTCTAGTGGAGACGAGAGACAGCGCGCCGCCATATACTCTCTGTATAAGCATATCTATTATAACGAGAGATTATCTACGTCGAGCGGCCACGCGCGATCATATGTCCGCGGAGAATTGCGCGCCATCTACGCGCGCGGGGGAGTATATATCAATAAGTATTGTCTCGTGTGTAGATAGCCTATCGGTTGCTAATAAATCAGTCGGTCTGCCACACCAGTGGATAATGACTCTGATGGAGTCATAGGACAGACTCCATCCTAGACAGGCATCCTACACGCACGTCACATGGCCTCCGGTTATTT…	1224	1	AT5G23990.1	ATFRO5/FRO5 (FERRIC REDUCTION OXIDASE 5); ferric-chelate reductase	Encodes a ferric chelate reductase that is expressed at low levels in roots,shoots and flowers, but not cotyledons.	similar to ATFRO4/FRO4 (FERRIC REDUCTION OXIDASE 4), ferric-chelate reductase [Arabidopsis thaliana] (TAIR:AT5G23980.1); similar to Fe(III)-chelate reductase [Citrus junos] (GB:ABJ16556.1); similar to unnamed protein product [Vitis vinifera] (GB:CAO49469.	45.45	22	12	0	794	859	150	171	1.4	31.2
MMN1.Contig_1269	GACCCAAAAACATAATCGTCAATATCAGCAAAACAAAACAAAATACAGAGAAATGGCGACGACAACAACAGAAGCAACGAAGACTTCTCCTACCAACGGAGAAGACAAGCAATCTCAGAATCTCCGACACCAAGAAGTCGGTCACAAGAGTCTCTTACAGAGCGACGATCTCTACCAGTGTATTCTGGAGACAAGTGTGTATCCAAGAGAACCAGAATCAATGAAAGAACTCAGGGAAGTGACAGCAAAACACCCTTGGAACATAATGACAACATCGGCAGATGAAGGACAGTTTCTCAACATGCTCATCAAGCTCGTTAACGCCAAGAACACGATGGAGATTGGTGTTTACACTGGCTACTCTCTCCTAGCCACCGCTCTCGCTCTCCCTGAAGACGG…	737	1	AT4G34050.1	caffeoyl-CoA 3-O-methyltransferase, putative		Identical to Probable caffeoyl-CoA O-methyltransferase At4g34050 [Arabidopsis Thaliana] (GB:O49499;GB:Q8L989); similar to caffeoyl-CoA 3-O-methyltransferase, putative [Arabidopsis thaliana] (TAIR:AT4G26220.1); similar to caffeoyl-CoA 3-O-methyltransferas	92.06	63	5	0	549	737	162	224	4e-110	130
MMN1.Contig_127	CGGGTGGAAAATGTTGAGATCCTCGTTTCGGCTTCTCTATATAACAAGAACCAATCTTCTGGTTCGAGCTTCACCATCATCGCTCTCTCGACTCTCATCTAAGTTCAGCTCTGCGAAACCACTTGTCAGTTCTCATCATCAGATTCCGTTATCGACAACGGGAGCTAAACTTTCTAGGTCGGAACATTCCATGGCTGCTTCCTCCGAACCCAAATCCATCTATGACTTCACCGTCAAGGATGCGAAGGGAAACGATGTTGATCTAAGCACTTACAAGGGGAAGGTTCTGTTGATTGTCAACGTTGCTTCTCAGTGTGGCTTGACCAATTCGAACTATACTGAGCTTGCACAGCTGTACCAGAAGTACAAAGACCATGGGTTTGAGATCCTTGCATTCCC…	920	6	AT4G11600.1	ATGPX6 (GLUTATHIONE PEROXIDASE 6); glutathione peroxidase	Encodes glutathione peroxidase.	Identical to Probable phospholipid hydroperoxide glutathione peroxidase 6, mitochondrial precursor (GPX6) [Arabidopsis Thaliana] (GB:O48646;GB:Q94BV3); similar to ATGPX7 (GLUTATHIONE PEROXIDASE 7), glutathione peroxidase [Arabidopsis thaliana] (TAIR:AT4G	86.64	232	28	2	11	697	1	232	8e-104	373
MMN1.Contig_1270	GGGAAAAAAGAAAAGAAAAGAAAAAGAAGATCTCATTTCACCCTCCATCTCCCTTCCTCCTCTTCCGAAGAAGAAGAAGACGATCGTAAGGATTAAGGTTTCTTCTGCGAAGCGAAGATGAGGGAGATCATTAGTATTCATATTGGTCAAGCTGGGATCCAAGTCGGAAACTCCTGCTGGGAGCTTTACTGCCTCGAGCATGGCATCCAGCCTGATGGCATGATGCCCAGTGATACTACGGTTGGTGTTGCGCACGATGCGTTCAACACGTTCTTCAGCGAGACTGGAGCTGGAAAGCATGTCCCTAGAGCTATCTTCGTTGATCTCGAGCCTACCGTTATCGACGAGGTACGTACCGGAACGTACAGGCAGCTTTTCCATCCAGAGCAGCTTATCTCT…	721	1	AT5G19780.1	TUA5 (tubulin alpha-5)	Encodes an isoform of alpha tubulin. Closely related to adjacent gene TUA3 suggesting recent duplication.	Identical to Tubulin alpha-3/alpha-5 chain (TUBA5) [Arabidopsis Thaliana] (GB:P20363); similar to TUA3 (tubulin alpha-3) [Arabidopsis thaliana] (TAIR:AT5G19770.1); similar to TUA2 (tubulin alpha-2 chain) [Arabidopsis thaliana] (TAIR:AT1G50010.1); similar	99	201	2	0	118	720	1	201	2e-102	368
MMN1.Contig_1271	AAGCAGTGGTATCAACGCAGAGTGCCCATTACGGCCGGGAGTTGTTAAAATTCCTTATGATATGCAGCTAAAACAAGTTCTAGCTAATGGTAAAAAAGGAGCTTTGAATGTGGGAGCTGTTCTTATTTTACCGGAGGGGTTTGAATTAGCCCCCCCCGATCGTATTTCACCCGAGATGAAAGAAAAGATAGGAAATCTGTCTTTTCAGAATTATCGCCCCC	221	1	ATCG00540.1		Encodes cytochrome f apoprotein; involved in photosynthetic electron transport chain; encoded by the chloroplast genome and is transcriptionally repressed by a nuclear gene HCF2.	Identical to Apocytochrome f precursor (petA) [Arabidopsis Thaliana] (GB:P56771); similar to cytochrome f [Crucihimalaya wallichii] (GB:YP_001123475.1); contains InterPro domain Rudiment single hybrid motif (InterPro:IPR011054); contains InterPro domain C	100	60	0	0	41	220	83	142	4e-29	122
MMN1.Contig_1272	GGGGAAATCGCATAAATTGGGTCGGCAAATCCCTAATTCCCGGTAACCTAAAGAAGTATCTCTCTGTAGTTTTCAATAATCGGCCATGGCTGCGAAACTTCTTGCGACTTTCATAGTCTACGGCTCTGGAGCGGTAATCAGGGCTTGTACTCAGGCATATCGTCAGGCACTTGCAAATGCATCAAAATCTGGGGTTGCGCAAGAAGCAATGCATAGTCTTAAGAGAGGAATCAGAGGGTTAACTGAACCCGAAGCTAGACAGATTCTTGGTGTAACCGATAAATCATCTTGGGGCGAGGTTCTTAAGAGATACGACAATCTTTTCGAACGCAATGCAAAAAGCGGAAGCTTTTATCTCCAGTCAAAGGTTCATCGAGCTAAAGAATGCTTAGAGGCTTG…	714	1	AT5G61880.2	signaling molecule-related		similar to TXR1 (THAXTOMIN A RESISTANT 1) [Arabidopsis thaliana] (TAIR:AT3G59280.1); similar to unnamed protein product [Vitis vinifera] (GB:CAO68391.1); similar to hypothetical protein [Vitis vinifera] (GB:CAN73075.1); contains InterPro domain Protein Tr	71.7	106	30	1	86	403	1	105	1e-37	153
MMN1.Contig_1273	GACATCAATAGTATGTTATCTATCTTTTAAACTTTGGAGAAAGGATGAAGATGTTACCAGAAGCATGCGTGGCGAACATCCTCTCCTTCACAACTCCTGCAGATACGTTCTCGTCGGCGTCTGTCTCCTCAGTTTTCAGACTTGCGGGAGAGTCTGACTTCGTGTGGGAAAAGTTTCTACCCTCTGGTTACAGCCGCCTCATCTCTACATGGACGCATGGGAGTTTCTCCTCCAAAAAGGAGCTCTATCGATGTCTCTGTGAATCAATTCTCATCGAAAATGGCAGAAAGATATTCAAGATTGATAAGCTATCTGGGAAGATAACGTATGTTCTGTCGGCAAGAGATCTTTCCATAACTTGGAGCGATCAACGACATTACTGGTCTTGGAGCCATCGAT…	699	1	AT1G09155.1	ATPP2-B15 (Phloem protein 2-B15); carbohydrate binding		Identical to F-box protein PP2-B15 (PP2B15) [Arabidopsis Thaliana] (GB:O80494;GB:Q8LBR0); similar to ATPP2-B13 (Phloem protein 2-B13), carbohydrate binding [Arabidopsis thaliana] (TAIR:AT1G56240.1); similar to unnamed protein product [Vitis vinifera] (GB	80.56	216	40	1	51	692	2	217	7e-98	353
MMN1.Contig_1274	GAATCGCAGATCTGCATACCAAAATTCCAGCGAAGATCATCACTCACCATGGCCATCCCCTTAGCTAAGCTCCTGATCTCCGCCGTGGCGGTCTTCATGCTCGTCTCCGCTTCGTTCGCGACCTCGGAAATGCCGTTCATGGTGGTTCACAAGAAAGCTACTCTCAACAGGCTCAAATCTGGCGCCGAGCGCGTCCTCGTCTCCTTCGACATCTACAACCAAGGATCTGCGACGGCGTATGATGTGACTCTGGTTGATAACACCTGGATTAAGAAAACTTTTGAAGTTGTTAACGGAAACACTTCAAGATCATGGGAGAGACTTGATGCAGGAGGTATTCTGTCTCATTCCTTCGAACTTGAGGCTAAGGTTAAAGGACCCTTCTATGGAGCTCCTGCG…	666	1	AT5G14030.4	translocon-associated protein beta (TRAPB) family protein		similar to unknown [Populus trichocarpa] (GB:ABK94173.1); contains InterPro domain Translocon-associated beta; (InterPro:IPR008856)	85.2	196	28	2	49	633	1	195	1e-87	318
MMN1.Contig_1275	AGAGAAAGAATATGAAGGAAGATTCGTCGATGACGTAGTATAGGTGCGCATATAGTCTCGCGCGCGCGGCAAACACACCAGAGACGACAGCGATGTCAGGTGAGCAGAGAGAAGCGCGCGCATATAATCTTCTGTATAGACATACATATATACAGAGAGTTATCTAGTCGAGCGGCCCCGAGACATAGTGCCGCGGAGAATTCGCGCCTATTACGCGCGCGGGGAGCATTAATGAATTGTACTGTCTCGTTTGCTGATCGCCTGATGGTTGCATCTCAATCAGTCTGTCTGCCAACCAGTGGACAATGCTCTTATGACGCTTTTGTCAACTGCCTCTAAACATGATTCAGAGACATCTGGCAACAGGGACGCATACAATGCCAATTAATGGATTCGATT…	1225	1	AT5G56040.2	leucine-rich repeat protein kinase, putative		similar to leucine-rich repeat transmembrane protein kinase, putative [Arabidopsis thaliana] (TAIR:AT3G24240.1); similar to protein kinase family protein [Arabidopsis thaliana] (TAIR:AT4G26540.1); similar to leucine-rich repeat transmembrane protein kinas	25	104	74	3	219	518	637	735	9	28.5
MMN1.Contig_1276	ACACGTTATTCGAAACACAATGTGAGAGTCATATTATCGGGAGCTTATGAATTGTCTGTTCTTTGTGATGCCGAGGTTGCTCTCATCATCTTCTCCAACCGTGGCAAGCTCTATGAGTTTTGCAGCTCCTCTAACATGATCAAGACACTGGAACGGTACCATAAATGCAGTTATGGTTCTATTGAAGTCAACAATAAACCTGCCAAAGAACTTGAGAACAGCTACAGAGAGTATCTGAAGCTCAAGGGTAGATATGAGGGCCTTCAGCGTCAACAAAGAAATCTTCTTGGAGAGGATTTAGGACCTCTGAATTCAAAGGAGTTAGAGCAGATTGAGCGTCAACTACATGGCTCTCTCAAGCAAGTTCGCTCCATCAAGACACAGTACATGCTTGACCAG…	788	1	AT5G15800.2	SEP1 (SEPALLATA1)	Encodes a MADS box transcription factor involved flower and ovule development. Functionally redundant with SEP2 and SEP3.	Identical to Developmental protein SEPALLATA 1 (SEP1) [Arabidopsis Thaliana] (GB:P29382;GB:Q9LFU6); similar to SEP2 (SEPALLATA2), DNA binding / transcription factor [Arabidopsis thaliana] (TAIR:AT3G02310.1); similar to SEPALLATA1 [Arabidopsis lyrata subs	37.74	53	33	0	572	730	207	259	5e-79	32
MMN1.Contig_1277	AGTAAAAAATTGGATGCATGCGCGGGCATTGAGAAGGAAGGACGCTTTCAAAGGCGAGAGGACATGGGGAGATGGCGAATGAGAGTAAGGGATCGTCATAGAAGGGTGGTGTATCCGAGTTGCGAGCGTGATCGGAGTATTCAGGTACGGTCTGAGTGATGAGAGATGAGAGTGATGTGGATATGAAGAGAACCAGAGGAGGAGACAACCCGTTAGTGGAGGCGAGCGGTAGCGGATATGGGATTTGAATGAAAAGAAAAAAGACAAAATAAAAACATGCCGGCCGCCTCGGCCCCCGGAAAGCTATATGACAATTCTGAAGGCGCGAGGGCCCAGGGAGGGCAGAGGGCATGGACGTGACAATTGGCAAAGAGAGCCAGGGCCTGGTTCGGCAAGGGT…	713	1	no significant hit
MMN1.Contig_1278	TCTCGACATCTATTTGTGACTTGGATCTCCGAGTCGACTCACGTATTAGTAGCGTCGCCTAGCGCTTTCCTCCGCGCGCGCGCGAACAGACACCGAATGCGGACGGCGGAAGTCTCAGTTGAAGCCGAAGGGAAAGCCCGCTCCGGCCTATATCCTTTTCTCTATTATGCAAAATCATTTATTACTCGAAAGNTTATTCCTCGTCCCGACCGCGCGCCACCGCAACCAATATTGTCGCCGGGCGAAGATATCTGCGCTCACTCTACAGGCCGCGCGAAGAAGCAGTACATAAACTACTACACTATGCGCCGACCTCGCGTCGTAGCTGTGATACTCTCATAGTGCATGTGTACAAATCGGTCATAAGCAAATTGCNTCGAAGTTTCGATTTGTGAGTTA…	1346	1	no significant hit
MMN1.Contig_1279	AAAGAGAAATATATAAAGGATAACTAATAGATTTATGTGGTAGTTGTCTGAGTTAAACAACCGAAGAGAGCGAGTCAGTGAGCGAGGAAGGGGGATACTCTCTCTTTCTCTCTCTCTTGCCATTCGATACGCAGCTTTTGAATCGAGATGGATGATGATTTCTAGATGCCTCCCGTCGGTGGAATCAACGGCGACGACGATATGGACTTCGGCGACGACACCTCCTTCCTCAAAGTCGGCGAGGAGAAGGAGATCCAGTAAGGCTTGAAGAAGAAGCTCCTCAAGGAAGGCGAAGGATTCGAGACTCCTGAGAACGGCTATGAAGTCGAAGTGCACTACACTGGTACTTTGCTCGAAGGGTACCGAGGTCTATTCCAGCCTTGACAGAGGAACGCCTTT…	853	1	AT3G25230.2	ROF1 (ROTAMASE FKBP 1)	Encodes a a high molecular weight member of the FK506 binding protein (FKBP) family. It has three FKBP12-like domains, tetratricopeptide repeats, and a putative calmodulin binding domain.	Identical to 70 kDa peptidyl-prolyl isomerase (ROF1) [Arabidopsis Thaliana] (GB:Q38931;GB:Q38949;GB:Q9LSF3); similar to peptidyl-prolyl cis-trans isomerase, putative / FK506-binding protein, putative [Arabidopsis thaliana] (TAIR:AT5G48570.1); similar to	81.25	32	6	0	359	454	71	102	1e-17	55.8
MMN1.Contig_128	AGCAGTGGTATCAACGCGGAGTGCCCATTACGGCCGRGGTTCGATCATTGCCAAAAGATTCATCTCAAATTTCGTTCGCTCTCCTTGATTGTTAAAAAAATGGCAGGTCGCGGAAAAACTCTCGGATCGGGTGCGGCGAAGAAAGCCACGTCTCGTAGCAGCAAGGCGGGGCTCCAATTCCCGGTGGGTCGTATCGCTAGATTCCTCAAAGCCGGTAAATACGCCGAACGTGTCGGAGCTGGTGCTCCGGTTTATCTCGCCGCCGTCCTCGAGTATCTAGCCGCCGAGGTACTTGAACTGGCTGGAAACGCAGCGAGAGACAACAAGAAGACACGTATCGTCCCTCGTCACATCCAGCTCGCCGTGAGAAACGATGAGGAGCTAAGCAAGCTTCTTGGA…	609	3	AT5G54640.1	HTA1/RAT5 (RESISTANT TO AGROBACTERIUM TRANSFORMATION 5); DNA binding	Isolated from T-DNA insertion line, the rat5 mutant is deficient in T-DNA integration. Encodes histone2A protein.	Identical to Histone H2A.6 (RAT5) [Arabidopsis Thaliana] (GB:Q9LD28); similar to HTA2 (HISTONE H2A), DNA binding [Arabidopsis thaliana] (TAIR:AT4G27230.1); similar to unnamed protein product [Vitis vinifera] (GB:CAO39058.1); contains InterPro domain Hist	96.92	130	4	0	100	489	1	130	8e-44	173
MMN1.Contig_1280	AAAAGGGGAGGTTTTGTTCGCGTTTCTTCCGCGTGTGTCGCTAAATGATAGCAGCAACCGACGAAAAAACAAAAAAAAGTAATGAACGAGCATCCTGCCCATATCTTCATATAACATACATTATACTAAGTTATCAATCGACCGGACCAGACATATGCCAGGTAATTCATTCATTACTGCCGGATCCAAAAAAACAAAGCACATCTCCCCATGATCTCGATTACATCCTATGACTCCCATTGTTCCTTCTTACCAAGATAATTAACACCATACATAGGAATAAATATACCTCTACAATCCTAAGATTAAAAAAAAAATTATTTATTCTCATAGGCTTCGACTGAGTGTTTAGTACAAATTCTTCTGTGGACGAGATTCAATGACGTCAGGCGTGGTATC…	918	1	AT5G19780.1	TUA5 (tubulin alpha-5)	Encodes an isoform of alpha tubulin. Closely related to adjacent gene TUA3 suggesting recent duplication.	Identical to Tubulin alpha-3/alpha-5 chain (TUBA5) [Arabidopsis Thaliana] (GB:P20363); similar to TUA3 (tubulin alpha-3) [Arabidopsis thaliana] (TAIR:AT5G19770.1); similar to TUA2 (tubulin alpha-2 chain) [Arabidopsis thaliana] (TAIR:AT1G50010.1); similar	42.86	49	28	1	385	531	26	73	0.0004	42.4
MMN1.Contig_1281	GGGAAAAAAAATTTTATCTGATCGATGATAGTATAGTTGTGGCGGGGGGAAGAAAGAAATTAAAAAGACAAATGATCTCATTTCATCCTATGTCTCCATTCGTCGGATTCCGAATAACAAGAAGAAGATCGTACGCATTAATGAGATTTAGTGAGACGACACAATTGGACTATTGTAAACATGGGGGACCGCGGGGATAAGATCAGGGGATGAGATGACTGACAGGGAGTTTATTGCGGTCGTCTCTGATGGTGACGATAGATGGAGAGATTATTGGGAGTACTCCACGGCGGGGTCGTGTGTTAGTCACCCCATGTTCCACGTGTTTGGTATTGCTGTGATTGCTTATTATCAGCTTCATATAGGGAACGATTTGGTCTCTATGGCGAGGTTCGAGTT…	624	1	AT4G05160.1	4-coumarate--CoA ligase, putative / 4-coumaroyl-CoA synthase, putative	Encodes a peroxisomal protein involved in the activation of fatty acids through esterification with CoA. At4g05160 preferentially activates fatty acids with medium chain length (C6:0 and C7:0) as well as even-numbered long-chain fatty acids (C14:0, C16:0	Identical to 4-coumarate--CoA ligase-like 7 (4CLL7) [Arabidopsis Thaliana] (GB:Q9M0X9); similar to OPCL1 (OPC-8:0 COA LIGASE1), 4-coumarate-CoA ligase [Arabidopsis thaliana] (TAIR:AT1G20510.1); similar to hypothetical protein [Vitis vinifera] (GB:CAN7056	42.62	122	64	5	68	415	162	275	3e-33	67
MMN1.Contig_1282	CCCTTTCCGGCGGGAGGAAGCGACTCACCACGACCAGTGAGAGAAGAAGAATCTCTGGCGAGAAAGACGGCATTGCCGGCATTCGTGGAGACGTCGCCGGATGGATACGATCCTGCTACTCGTTAGGACGATCCTGAGCCCAAGATGGCACTGAGAAATGTTGTCTTCCGGGACAAGTGGATCTTGAACGTGAAAGAAAATATCAGAGCACCAAAAGGTGAAATGGTGTGACCTCGACGAAGGAGTCAACCATTACCAGAATTGCCGGCATCTCTTTCGGTAGTACCTCGACTCCAGTCGCGGAGTCGGATGGGGCATCCATCACCGATCTATGTCCTCTCTACGGGCCTAAGCCTGATGACGATGAATCTGAGTACTGATTAATCTGACGTGACGGAG…	721	1	AT3G18410.2	NADH-ubiquinone oxidoreductase-related		Identical to NADH dehydrogenase [ubiquinone] iron-sulfur protein 6 [Arabidopsis Thaliana] (GB:Q9M9B4); similar to NADH-ubiquinone oxidoreductase-related [Arabidopsis thaliana] (TAIR:AT1G49140.1); similar to unknown [Populus trichocarpa] (GB:ABK93904.1)	38.89	54	33	0	55	216	1	54	5e-19	44.3
MMN1.Contig_1283	GGGAGACAACAAAACTAAGAAGACACATATTATCACTAGAGACAGAGGACGTATAGAAATCTCTGACTGCGTTCGTGGGAACATCGTCACATGCGCGAAATCCGGCGAAACGTTCGTATGGAGCTGAGCCCAAGAAAGAATCGGAGAATGTGGTCATGCTGAACAAAAGGATCTGGAACCTCAAAGAAAATAAGGGGGAGCAAGAGTGTGAAGAGAGGAGCAAGACGAAGGATGCTACTATTATGAGGCCTAACAGCTTCGTCTCTGGTTGTGACCACATCAGCAAATCGTAGAAACGGATAGGGGCATAGACACCGACCAATGAAGTGCATATGGTTTTCTAGCTGATTACGGTGGTTCTCTGAAGTGCTGTTTATTCAAGAATAAAGAATCTATTTA…	705	1	AT2G25120.1	bromo-adjacent homology (BAH) domain-containing protein		similar to bromo-adjacent homology (BAH) domain-containing protein [Arabidopsis thaliana] (TAIR:AT4G23120.1); similar to unnamed protein product [Vitis vinifera] (GB:CAO62823.1); contains InterPro domain Bromo adjacent region; (InterPro:IPR001025)	31.43	35	24	0	126	230	8	42	2.4	29.3
MMN1.Contig_1284	GTATTTGGATTATGGGCGGGGGATGATTTGGATTGATGCTCGGGCATTGAAAAGGAATGACTCTTTCACAGGCTAAAGTGTATGGGGAGATATCCTTGGTTATGATGGATGCTGGATCGTGAAAGTGTATCCAAGCTTCGTGACTAGTCTGCGGTCTTTGGACTTTGAAAACTTAATGAATTGACTCATCTCGCCGCCGGTAAGAAGGAAATCATCTTCGGTGTCCCTGGTGCTTTCACCCCCACCTGCAGTATGCTGTATGTGCCTGGATTTTGGGAGAAAGCACAGGAGTTGAGGTCAAATGGTGTTGACTAGATCATTTGAATTCGTGTGCATGATTCGTTTGTGATGAAGGAATGGGGGAAGACGTACCCAGAGAACAAGCATGTGAAGTTAGTG…	693	1	AT1G65980.1	TPX1 (THIOREDOXIN-DEPENDENT PEROXIDASE 1); antioxidant	thioredoxin-dependent peroxidase	Identical to Peroxiredoxin-2B (PRXIIB) [Arabidopsis Thaliana] (GB:Q9XEX2); similar to TPX2 (THIOREDOXIN-DEPENDENT PEROXIDASE 2), antioxidant [Arabidopsis thaliana] (TAIR:AT1G65970.1); similar to type 2 peroxiredoxin [Brassica rapa subsp. pekinensis] (GB:	79.59	49	10	0	431	577	112	160	4e-46	75.5
MMN1.Contig_1285	AAGGATGGGAGTAAGGTTATATAAAGTAATATAATAGGGTGGTGGTTCGGCCGCGGGGAATCGCAAATCTGCATACCAAAATTCCAGCGAAGATCATCACTCACCATGGCCATCCCCTTAGCTAAGCTCCTGATCTCCGCCGTGGCGGTCTTCATGCTCGTCTCCGCTTCGTTCGCGACCTCGGAAATGCCGTTCGTGGTGGTTCACAAGAAAGCTACTCTCAACAGGCTCAAATCTGGCGCCGAGCGCGTCCTCGTCTCCTTCGACATCTACAACCAAGGATCTGAGACGGCCTATGATGTGACTCTGGTTGATAACACCTGGATTAAGAAAACTTTTGAAGTTGTTAACGGAAACACTTCAAGATCATGGGAGAGACTTGATGCAGGAGGAATTCTG…	720	1	AT5G14030.4	translocon-associated protein beta (TRAPB) family protein		similar to unknown [Populus trichocarpa] (GB:ABK94173.1); contains InterPro domain Translocon-associated beta; (InterPro:IPR008856)	77.27	176	39	1	106	630	1	176	2e-67	251
MMN1.Contig_1286	CAAGAAATATGAAGCAGGTTTGCTCCGGGAATGTGGTTGTGTTTGATGATGGGTCGATGGTGCTAGTGACCCACTCGGACGTAGAGGGCTATGATGAGAGGTCAATGAATGTTGCTGGGAACGAGTTATGGGCGGCAGCTGCAGATATAAGCATGGTGTACCGGGTGAAAGTGGTGGGGCAAGCTGCGTTGGCGAGGATCTCGTGCCTGTGGCTGGGATTGCGTGAGAACCATAAGCTTTCTGGGAAGAATCTTTCCATGGGAGGTATAGGCGTCGACATTTCTGTCTACTGATGAATTATGATGATGGTGAGTCTACTGGCGAGCGAGTGAATATGCCTCGTCCACTGTTTCTCCCCAGGAAAAAAGGGGTCTATAAATAAAAAGGGGTCAAAAGTAG…	502	1	AT2G35680.1	dual specificity protein phosphatase family protein		similar to dual specificity protein phosphatase family protein [Arabidopsis thaliana] (TAIR:AT5G56610.1); similar to unknown [Populus trichocarpa] (GB:ABK95576.1); contains InterPro domain Protein-tyrosine phosphatase, dual specificity; (InterPro:IPR00034	81.37	102	13	1	3	290	236	337	1e-41	165
MMN1.Contig_1287	GACAGCAATCCTCGCTTCTTCATACTCCTCTCCACAGAATTCCCACGTTGATGATAAGACTCCTTCAACAACTGATGTATTGTCTAAATACTCTATTGTTGCTCTTCTCTGCTTTCTTCTTGTTATTCGTCTTACCCACGTCAAGCTGCATCTCTCGAACGAGATCACGGGATTGCCAACTTCTCTTGAATGAAGAAAAGCTTCTGTAGCTGCGACTTCGCTCGATCCTCTTGCTGAACCTTCCCACTCCGGTACCGCCAGTTTTGATACAGTATATAGCTGCGTACCTCTTGGATCCTACGTTTTCCACTACATAATCTCCTGCTTAGATACCCTCTCCCCCCTGAGAGTGCTTCTGCTCTGATCTTTTTGTGTGACTCTCACTCATATTTGTTCTGA…	711	1	AT4G35980.1			similar to unnamed protein product [Vitis vinifera] (GB:CAO48186.1); contains domain PTHR21068 (PTHR21068); contains domain PTHR21068:SF3 (PTHR21068:SF3)	48.65	74	38	1	47	268	7	79	1e-09	60.1
MMN1.Contig_1288	ATCGTTAAACCCAACACGGTCGAGTCAAAGAACAGAGTCTCACTCAGTGCTTACATCTTGAGCAACAGCCATGGAAGAGCAGCAATTGTGAGAGCAGCTGCTTCTGGCGTGGACGGAGCTGAGCCCGAGGAACCACCTAAGACTGTTGTCTCAGTGGACAAACTACCATTGGAATCAAAAGAAGCTAAAGACAAGCTATTGCTGGAACAGAGGATGAAGATGAAGCTGGCCAAGAAGATTAGGCTACGCAGGAAACGTCTGGTTCGTAAGCGTAAGTTGAGGAAGAAGGGTCGATGGCCTCCTTCCAAGATGAAGAAACTCAAGAATGTTTAGAGATGATTATCATGACTCTTTGCTCTCTTTTTTTATTTAACTTTTTTTTTTGTAATGTTGTTTGTA…	440	1	AT3G56910.1	PSRP5 (PLASTID-SPECIFIC 50S RIBOSOMAL PROTEIN 5)		Identical to Plastid-specific 50S ribosomal protein 5, chloroplast precursor (PSRP5) [Arabidopsis Thaliana] (GB:Q9LER7;GB:Q94B31); contains domain PD031914 (PD031914)	81.58	114	16	3	4	330	36	148	6e-25	109
MMN1.Contig_1289	AGGCGTACCAAATCAAACACTGTGCTCCTTTCTGGGCTCAGTGGAAGTGGAAAGACTGTGCTCTTCTATCAACTCCGAGATGGATCATCCCATCAGGGTACTGTAACATCAATGGAACCGAATGAAGGCACTTTCGTTCTTCACTCCGAAAACGCTAAGAAAGGAAAAGTCAAGCCTGTTCATCTTGTTGATGTTCCTGGACACTCTCGGCTTCGACCTAAGCTGGAAGAGTTCTTGCCCCAAGCAGCTGCTATTGTCTTTGTTGTAGACGCCTTGGAGTTCCTCCCTAACTGTCGTGCAGCTTCAGAGTACCTATACGACATTCTGACGAATGCCAACGTTGTCAAGAAGAAGATACCAGTCCTCCTTTGCTGTAACAAGACGGATAAACTCACCGCG…	665	1	AT5G05670.1	signal recognition particle binding		similar to signal recognition particle binding [Arabidopsis thaliana] (TAIR:AT2G18770.1); similar to unnamed protein product [Vitis vinifera] (GB:CAO66106.1); similar to Os08g0524000 [Oryza sativa (japonica cultivar-group)] (GB:NP_001062284.1); contains d	94.74	209	11	0	1	627	52	260	4e-112	400
MMN1.Contig_129	TACTTCGCCGCCACCGATTCAGGTCTCGAGTTCGACGAATCCGATCTCTACTCATCCGCCGGTTCCGTCCACTCCGCTTCGCCTCGGAAAAAAATCTCTGCATCCGTCAGATCCGGTAAAAAACCGTCGAACCGGCCGTCCTCGTGCGCCGGCGCCCCCGCGACRTCGCTCCCGATAAACGTGCCGGACTGGTCGAAGATTCTCCGCGAGGAGCACCGCGATAACCGTCGGAGGAGGATCGAGGACGACGACGGMGAWTCGGAAGACGGAGAGGAGTGGTTGGRCGGTAGCGGCGGGAGATTGCCGCCGCACGAGTTTCTGGCGAGGACGAGGATGGCGTCGTTCTCGGTGCACGAAGGAGTTGGGAGGACGTTGAAGGGGAGAGATCTGAGTAGGGTC…	664	2	AT5G60680.1			similar to unknown protein [Arabidopsis thaliana] (TAIR:AT3G45210.1); similar to unnamed protein product [Vitis vinifera] (GB:CAO21845.1); contains InterPro domain Protein of unknown function DUF584 (InterPro:IPR007608)	70.27	148	41	4	1	435	23	163	1e-38	156
MMN1.Contig_1290	GAGACAGCGCTTCATTATCACTTCCGACAAATCTCTTAATACCTTTTCCCACTGCCATACACACTACCTCCTTAAAATTTGTATATTCTTATATAGTTTTCTAAATACTTCTGGGTGAAACTAATCATGGCTGATCAAATATCCGGCGATAATCCAACCGAGAAGACGGCCGACAAGCTGAGCGAGACGCCCACAGGAGTTAATAGATACGCACTTCAATGTGCTATTGTCGCCTCCATCGTCTCCGTCATCTTTGGTTACGATACTGGCGTAATGAGTGGAGCGATGGTGTTTATATAATGAAGAGTTGAAGACTGACCATGTTCAGATCGAAGTTCTCACCGGTATTCTCCCCCTTTGTGCGCTAGTCAGATCTGTGCTCGACGGATCAACATCAGA…	728	1	AT4G36670.1	mannitol transporter, putative		Identical to Probable polyol transporter 6 (PLT6) [Arabidopsis Thaliana] (GB:Q8GXR2;GB:O23213); similar to mannitol transporter, putative [Arabidopsis thaliana] (TAIR:AT2G18480.1); similar to hypothetical protein [Vitis vinifera] (GB:CAN68316.1); contains	73.53	34	9	0	302	403	47	80	2e-37	49.7
MMN1.Contig_1291	TCTTGAATCCATTAGGTCAATCCACGCAAATAGAGTATCACATCCCTAGATCTTTCTTGAAGCCCAAGAAAAACCTTCTTGGTTATATTCGAGGAAGAGCCTAATGTGAAGCCTGAGATTATAGACTTTGTCATCGTCAACAGAGACACTGTTTGTTCTTACGTCGGAGAAGGCTACACTCCAAGTGTTAGACACTGGACAAGGAAGCAAGACCAGGTCCAAGCCATCACCGATAACGTGAGTCTCACAGCTACTCTTAAATGCTCAGGCAACAAGAAGATCTCAGAAGTTGAGTTCGCTAGCTTCGGAAACCCTATTGGTACTTGTGGAAACTTCACACTTGGTACTTGTAATGCTCCCATTTCAAAGCAAGACGTTGAGAAGCATTGTTTGGGGAAA…	640	1	AT4G35010.1	BGAL11 (beta-galactosidase 11); beta-galactosidase	putative beta-galactosidase (BGAL11 gene)	Identical to Beta-galactosidase 11 precursor (BGAL11) [Arabidopsis Thaliana] (GB:Q9SCV1;GB:O49609); similar to BGAL16 (BETA-GALACTOSIDASE 16), beta-galactosidase [Arabidopsis thaliana] (TAIR:AT1G77410.1); similar to BGAL14 (beta-galactosidase 14), beta-g	87.07	147	19	0	64	504	695	841	3e-83	273
MMN1.Contig_1292	GACAGAAAACTATCAAAACCCAGTGCTGTGTGTATCTTCTCTAGAAGAAATGTGGGAAAATGTTGAGATGTGTTGGAGTGCACAAAAAAAGTAAAGCGTCGTTCTCTATGTGGTGTGCACCGTGTTGGAGATCGTGATCGCTCTATCTAGCTCTACTGTGAGTGCTTTGGTGTGAAGGTGTTGAGGAATAGAGATGTCTCTGAGGAGAAGGACTATAATGCTTTCCTTGGTTTTGCTTCTGAGAACTAATATTTCTTTGGCGAGCTCACTTATTAATATTGTGGTCTCTTATATGATATTGGAACTGGATGTGGACATTTCGGTGTTTGAACTTGAGATGTTTACTAGATGGTTGAAGCTGTCCGCGCCGCAGGTGGGAATGCCGCCACAAAAGTCTGC…	750	1	AT1G11840.4	ATGLX1 (GLYOXALASE I HOMOLOG); lactoylglutathione lyase	Encodes a glyoxalase I homolog ATGLX1.	similar to lactoylglutathione lyase, putative / glyoxalase I, putative [Arabidopsis thaliana] (TAIR:AT1G67280.1); similar to putative lactoylglutathione lyase [Brassica rapa] (GB:BAF81517.1); contains InterPro domain Glyoxalase/bleomycin resistance protei	31.52	92	63	0	121	396	154	245	0.0003	42.4
MMN1.Contig_1293	GAAGGCCAATAACTGCCACAAGACTTTTGAGTGCAAAAAACTTCCCATCAGTGTAAGGTTTGATTTTGTGGATAACGCTGAGATAAAAGACGTAACCTCGTTAGATGCCAAAAACTTCCACTTCAACGTTATCAGTGGCAAGAACATGACCTTTGATAACATCAAGATCATCGCTCCAGCTGAAAGCCCCAACACTGACGGTATCCATTTGGGAAGATGTGAGGGTGTCAAGATCCTCAACACTAAGATCTCCACAGGAGATGACTGCATCTCCGTGGGAGATGGGATGAAGAATCTCCACACTGAAAAAGTTGTGTGCGGTCCTGGACACGGAATCAATGTCCGAAGCCTTGAAAGAAACGGATGGGAGCAAGATGTCAACGACATTTAAGGTTATAA…	768	1	AT3G07820.1	polygalacturonase 3 (PGA3) / pectinase		similar to polygalacturonase, putative / pectinase, putative [Arabidopsis thaliana] (TAIR:AT3G07840.1); similar to polygalacturonase, putative / pectinase, putative [Arabidopsis thaliana] (TAIR:AT3G07830.1); similar to polygalacturonase, putative / pectin	36.51	126	80	1	390	767	253	377	1e-70	73.2
MMN1.Contig_1294	GGGAGAGCAATAAAAGCGTCGTGCTGCTAGGCGAAGCGGTGGAGTGCCGCACCCTAGATGGCGAGAGTCCAGTAGCCGAAAGCATCACTAGCTTATGCTCTGACCCGAGTAGCATGGGGCACGTGGAATCCCGTGTGAATCAGCAAGGACCACCTTGCAAGGCTAAATACTCCTGGGTGACCGATAGCGAAGTAGTACCGAAAGAAAAAAAAAAAAAGAAAAAAAAAAAACATGT	235	1	AT4G11270.1	transducin family protein / WD-40 repeat family protein		similar to unnamed protein product [Vitis vinifera] (GB:CAO65901.1); contains InterPro domain WD40 repeat-like (InterPro:IPR011046); contains InterPro domain WD40/YVTN repeat-like (InterPro:IPR015943); contains InterPro domain WD40 repeat (InterPro:IPR001	34	50	30	1	48	188	415	464	0.97	28.5
MMN1.Contig_1295	TTACATTCGATCGAGATCTCCTGAGGATTCTGAGACCTTAATTGAGCATCTCTGCTGTTGTTACGTTGTTTACAGAAGGTATAAAGCGGTAACACATAAACCCATATTATCCTAAGTTTCGTTCATGTGTCCTTAATTTCTCTGCATTCGAATAGTGTCAAGTACGAACTCTTCCGCAATACTTCTCATAGACTGTCGGACCGCCTCCTCGACTCTGGAGTAAAGAATGACACCAGCCGCTAGCCATATTCGAGGCCAAAAACAGTCTTGGCTCTCATCGTACACTCTCTTTAGGACTTTCCAGTGCTTAACAGTGATCAGGATGCTCCCTATATAACTGCCCAGCAGCCCATATTAAGACGATGTTACGAATTCAAATCCAGTTCACACTTTCTTATG…	756	1	AT1G56130.1	leucine-rich repeat family protein / protein kinase family protein		similar to leucine-rich repeat family protein / protein kinase family protein [Arabidopsis thaliana] (TAIR:AT1G56145.1); similar to leucine-rich repeat family protein / protein kinase family protein [Arabidopsis thaliana] (TAIR:AT1G56120.1); similar to le	33.33	42	27	1	99	221	80	121	7.9	27.7
MMN1.Contig_1296	GAGGAAGGGCGTAGTAAGCGACGAAATGCTTCGGGGAGTTGAAAATAAGCGTAGATCCGGAGATTCCCGAATAGGTTAACCTTTTGAACTGCTGCTGAATCCATGGGCAGGCAAGAGACAACCTGGCGAACTGAAACATCTTAGTAGCCAGAGGAAAAGAAAGCAAAAGCGATTCCCGTAGTAGCGGCGAGCGAAATGGGAGCAGCCTAAACCGTGAAAACGGGGTTGTGGGAGAGCAATAAAAGCGTCGTGCTGCTAGGCGAAGCGGTGGAGTGCCGCACCCTAGATGGCGAGAGTCCAGTAGCCGAAAGCATCACTAGCTTATGCTCTGACCCGAGTAGCATGGGGCACGTGGAATCCCGTGTGAATCAGCAAGGACCACCTTGCAAGGCTAAATAC…	739	1	AT1G47420.1			Identical to Uncharacterized protein At1g47420, mitochondrial precursor [Arabidopsis Thaliana] (GB:Q9SX77); similar to APFI, carbonate dehydratase [Arabidopsis thaliana] (TAIR:AT1G47260.1); similar to unknown [Populus trichocarpa] (GB:ABK92861.1)	93.33	15	1	0	433	477	238	252	1.5	30
MMN1.Contig_1297	GAAGAGAGAGAGAGAGAGAGAGAGAGAGAGAGAGAGAGAGAGAGAGAGAGAGATAGATATTTCTGGACCGTCAGAATATCTACTGAAGGAAAGGCGACTGGGAAGCAACTCGTGACTAATGCGGTGAGGAAATCGGTCCCGGTGACGGGAGGAGTGAAGAAGACGCACAGATTCCGTCCCGGAACGGTGGCGCTGAGGGAGATCAGAGAAGTACCAGAAGAGCACGGAGCTTCTGATCCGCAGGCTTCCCTTCCAGCGTCTGGTCCGCGAGATCGCGCAGGATTTCAAAACGGATCTGCGTTTCCAGAGCAGCGCCGTCGCGGGTCTCCAGGGAGCGGCGGAGGCTTACCTCGTGGGGCTGTTCGAGGACACGAACCTGTGCGCGATTCACGCAAAGAG…	586	1	AT1G19890.1	ATMGH3/MGH3 (MALE-GAMETE-SPECIFIC HISTONE H3); DNA binding	histone 3.3, male-gamete-specific expression	Identical to Histone H3-like 2 (MGH3) [Arabidopsis Thaliana] (GB:Q9FXI7); similar to histone H3 [Arabidopsis thaliana] (TAIR:AT5G10980.1); similar to histone H3.2 [Arabidopsis thaliana] (TAIR:AT4G40040.1); similar to histone H3.2 [Arabidopsis thaliana] (	63.27	49	17	1	67	210	7	55	3e-42	58.5
MMN1.Contig_1298	GACACTCAGCTAAGAGAGAGAGAGAAAGAAATCAAGTTAGCAAAAGACAGAGATGGAGGGGAAGAAGATAGGGAGGAGATTGGAAGGAAAGGTGGCGATAGTGACGGGTTCGACGCACGGGATCGGCTTCGGTATCATTAACCGTTTCGGCCTCGAAGGTGTCTTAAGAAAACGATAATTGCCACAGACAGGATCAGAAGCACAAAGCTAGAAATGAGGACCAACACCAACGACAAAAAAATCATCTTGAAGAGGATTAAGGACCTCAGAATTCATATGACCGTAATCATGTTGAAGCGTCAACTAGATGGCTCTGTAAAGTTAGTTAGCTCTATCAAGAAATCATTACCTGTATTTAACTCTACTGAGACCTTCTAACTCAACAAAAAATGTGTTCTT…	756	1	AT4G05530.1	short-chain dehydrogenase/reductase (SDR) family protein		similar to tropinone reductase, putative / tropine dehydrogenase, putative [Arabidopsis thaliana] (TAIR:AT2G29150.1); similar to unnamed protein product [Vitis vinifera] (GB:CAO23245.1); contains InterPro domain Glucose/ribitol dehydrogenase; (InterPro:IP	81.82	33	6	0	62	160	3	35	3e-08	55.8
MMN1.Contig_1299	AGAAACTGTCGGTTCAAGAAGGAGAGGTAGAGATTGAGCTAGACTTAGGGCTTTCTCTCAACGGTAGGTTTGGTGTGGACCCACTTGCCAATAAGAGGCTGCTCGTGCGGTCACCTTCGATTCCTGACTTCGTGGTCAACGATGTTAGATCGGAGCTGAGTAGGACTTTCTCGTTGCCGGTGGAGACGGAAGAGTTGTTGAGGAAGAGGAAGGAGTTGCAGAGCTTGAGGAGGCTTGAGGCTAAGAGAAAGAGGTCAGAGAAGCAGAGAAACGCGAGGGATCAGAAACACAAGGCTGACAAGATCGTAGAAGAAGGATCTTCCGGAAGTGGTTCCTCTGGTTTGTCCGAACTCGACAACGCCCCTCCTCCTCCTGTTCAAGCAACAACGAACAAGTCCA…	760	1	AT3G29575.4			similar to TMAC2 (TWO OR MORE ABRES-CONTAINING GENE 2) [Arabidopsis thaliana] (TAIR:AT3G02140.1); similar to unnamed protein product [Vitis vinifera] (GB:CAO49169.1); contains InterPro domain Protein of unknown function DUF1675 (InterPro:IPR012463)	100	14	0	0	626	667	218	231	9e-59	34.7
MMN1.Contig_13	GAAGAAAAAGGAAAAGAAAAGACTCATATTCGAAAAAAGATCTTCGTCGTCTTCTCTGCGTCTCCTTTCAGCAGTCTTTGACATCGTCTTGATTCAGCCATGGCTAACGCGGCGTCGGGAATGGCAGTCCATGATGACTGCAAGCTAAGGTTCCTGGAACTGAAGGCGAAGAGGACACACCGTTTCATTGTTTACAAGATCGAGGAGAAGCAGAAGCAAGTGGTTGTTGAGAAGGTTGGTGAGCCTATTCAAACCTACGAGGACTTTGCTGCTAGCCTCCCTGCTGAAGAGTGCCGATACGCCATTTATGATTTTGATTTTGTCACCGCGGAGAATTGCCAGAAGAGCAAGATTTTCTTCATTGCTTGGTGTCCTGACGTAGCGAAGGTGAGAAGCAAG…	701	4	AT5G59890.1	ADF4 (ACTIN DEPOLYMERIZING FACTOR 4); actin binding	actin depolymerizing factor 4 (ADF4) mRNA, complete cds	Identical to Actin-depolymerizing factor 4 (ADF4) [Arabidopsis Thaliana] (GB:Q9ZSK3;GB:Q94A13;GB:Q9FJE7); similar to ADF1 (ACTIN DEPOLYMERIZING FACTOR 1) [Arabidopsis thaliana] (TAIR:AT3G46010.1); similar to Actin-depolymerizing factor 1 (ADF-1) (GB:Q9FV	97.12	139	4	0	100	516	1	139	9e-64	239
MMN1.Contig_130	GGTCACATCGTGTTTGATCCTTATCAACTTGCAGATATTTTCACAGGCCCAAAGATCTAAGATCCGAGTTACAAAGCAMAATGGCGATGGTTTCAGGAAGACGTTCTACGCTAAACCCCAACGCRCCTCTCTTTGTYCCAGCAGCCGTTAGACAAGTGGAAGATTTCTCTCCGGAGTGGTGGCAGTTGGTGACGACCTCCACTTGGTACCACGACTACTGGATCAGCCAGCACCAAGGAGCTGACGGATTCTACGACAACGGAGAGAGTSRWGAAGTCGATGTAGCTGATCTTCTTCCGGAGTCGTTTGATTTCGATGACATTGAAGATGTCTTYGAATCCGWGTTTGATCATCAAGGTTACGGTGGATATGTTGGACAACAGATGTATCATGCACCTT…	763	5	AT2G41430.2	ERD15 (EARLY RESPONSIVE TO DEHYDRATION 15)	Encodes hydrophilic protein lacking Cys residues that is expressed in response to drought stress, light stress and treatment with plant-growth-promoting rhizobacteria (Paenibacillus polymyxa), possibly revealing a connection between responses to biotic an	similar to unknown protein [Arabidopsis thaliana] (TAIR:AT4G14270.2); similar to unknown protein [Arabidopsis thaliana] (TAIR:AT4G14270.1); similar to ERD15 protein [Brassica rapa] (GB:ABV89651.1)	77.25	167	28	5	81	551	1	163	2e-65	245
MMN1.Contig_1300	GGTGGAGGAGGAGGAGGAGGGTGGAGTCAAGGGGAAAGTGACGGATCCGTTCGGGTTCACGTGGATCTTTGTTACTCCGGCGAAGAAGAGTGAGGAGGAAGGAAACAAAGAGGTCTAACTGTCAACCGTCGGATCTGATCATTTCGTCGGTTTCTGAAAAAAACTTTTTAATATTATTATCCTATGCTGCTTTTATTAGTTTGTCTTTTGTGGTATCTCCGGTATGAGTAAACCGGATTGATTAGGCTAATGACTTTTGTTCTTCACCACCTTTTGACATAAACTTGGTGAAAGAAATAACAAAAATATCGGATGTTAATGTTTTGTTGATTATGCC	337	1	AT5G48480.1			Identical to Uncharacterized protein At5g48480 [Arabidopsis Thaliana] (GB:Q9LV66); similar to unknown [Populus trichocarpa] (GB:ABK95611.1); contains domain SSF54593 (SSF54593)	56	25	11	1	41	115	143	166	1.3	28.1
MMN1.Contig_1301	GACTGTTCTCTAATCTAAATCTAATTTCACCTTTCCTACAAAACCTAAAACATTTTTCTTATTACACAAACTAAAAGTCCCTAAGTTTCTGATAATGTCGGAAGAGTTCGACGAATCTGAGATCATTTTCTCCGACAGCTTCTTCCCAATTCGCCGGCGTGAGGACGTGATCGAGAAAGAGAACCGTCCGGTTAATTTCCGAGAAAACTCCGAAACCAAAATGAGAAACACATCGAGGCTGAGTAAAACGACGCCGTTGCCTTCTTCACCAGCGGCTTTCTCATCATCGTCGCTTCCGGTGAATATTCCGGGAAGGAAGTATTCTTCTGAGGATGAGGAATATTCGGAAGACGGAGGAAGGAGAATGGTTCCGCCGCATCTGATCGTTGGACGGAGGAT…	630	1	AT1G29640.1			similar to unknown protein [Arabidopsis thaliana] (TAIR:AT2G34340.1); similar to unknown [Cucumis melo] (GB:ABQ53634.1); contains InterPro domain Protein of unknown function DUF584 (InterPro:IPR007608)	75	124	30	2	146	514	18	140	5e-34	140
MMN1.Contig_1302	GAGAATTAAAACGCTAAGAAAACACGCGCAAGAGTTTGAAGATCTGGAGAAAAAATTTCTGGGAAAATTCTGTGTTTCTCGGAGGGAAGATCCGTATATTCCATATCCGAAAGGTGTTTCGTTATTCTTCTGATCGGCGTCGGGTTGATCCAGTTGGATAATTCGAAAGATGGATCCTAACCAGGCACCAGTTGAAAACTATGCGAATCCGAAGACGTGTTTCTTCCATGTTCTCTTCAAGGGTGCTGCGTTGGCGTTTTACATTCTCTCGGCTCTCTTCTTCAACAGCTTTGTTATAATCTTTGTGGTGACTGTTCTTCTTGCGGCGCTTGACTTCTGGGTGGTTAAGAATGTGAGTGGACGTATACTTGTTGGTCTCAGGTGGTGGAACGAGATCAA…	743	1	AT1G09330.1			Identical to Uncharacterized FAM18-like protein At1g09330 [Arabidopsis Thaliana] (GB:Q8LEK2;GB:Q9ZPZ2); similar to unknown [Populus trichocarpa x Populus deltoides] (GB:ABK96699.1); contains InterPro domain Protein of unknown function DUF846, eukaryotic;	91.35	185	13	1	170	715	1	185	7e-94	340
MMN1.Contig_1303	GGGCTTATCTTAAGACTTAAGATTACAGAGGCGATGGCGATTAACGGCGAAGATCGCATCTCCGGCGAACGCCCGATCATCATGGTCACCAACGACGACGGGATAGACGCGCCTGGTCTCCGTTCTCTCGTTCGCGTCCTCGTCTCCACCAACCTCTACGACGTCCGCGTCTGCGCTCCCGATTCGGAGAAGTCTGCTGTTAGTCACAGTATCATATGGAGTAGACCTCTCACTGCACACCGTGTTGAGATTGAAGGAGCTGAGGCCTATGCTGTTTCTGGAACCCCTGCGGATTGCACTGGTTTGGGCTTATCCGAAGCGCTCTTCCCTTCTCTTCCTGACCTGGTTCTTAGTGGTATAAACGTTGGTAGCAACTGTGGCTACAACATCGTCTACTCT…	716	1	AT4G14930.1	acid phosphatase survival protein SurE, putative		similar to acid phosphatase survival protein SurE, putative [Arabidopsis thaliana] (TAIR:AT1G72880.2); similar to acid phosphatase survival protein SurE, putative [Arabidopsis thaliana] (TAIR:AT1G72880.1); similar to unnamed protein product [Vitis vinifer	89.08	229	23	1	34	714	1	229	4e-115	410
MMN1.Contig_1304	GGAAGCGAATCACGAAGACGAGTGAGAGAAGAAGAAGCAATGGGGAGAAAGAAGGGATTGCCGGAGTTCGAAGAGACGGCGCCGGATGGCTTCGATCCGGCGAATCCTTACAAGGATCCGGTGGCGATGATGGAAATGAGAGAGCACATCGTCCGGGAGAAGTGGATCCAGATCGAGAAGGCGAAGATCATGCGCGAGAAGGTCAAATGGTGTTACCGCGTCGAAGGAGTCAACCATTACCAGAAATGGCCGTCATCTCGTCCAGCAGTACCTCGACTCCACTCGCGGCGTCGGATGGGGGAAAGACCACCGTCCTATGTCGCTCCACGGCCCTAAGCCTGAGGCCGTTGAAGCTGAATAATGATTAATCTGAGGTGACGGAGCTTTTAATACAAGACA…	584	1	AT3G18410.2	NADH-ubiquinone oxidoreductase-related		Identical to NADH dehydrogenase [ubiquinone] iron-sulfur protein 6 [Arabidopsis Thaliana] (GB:Q9M9B4); similar to NADH-ubiquinone oxidoreductase-related [Arabidopsis thaliana] (TAIR:AT1G49140.1); similar to unknown [Populus trichocarpa] (GB:ABK93904.1)	73.79	103	22	3	40	333	1	100	8e-36	146
MMN1.Contig_1305	GGAAAACTCTAGCTTTTGCTTGATTGTTCTTCATAAAGCTTTTGAATTTCAGTGTTGTTTGTTTTCAAGCAATGGCAACTCCAGCTAGGAAGAGACTCATGTGGGACTTCAAGAGACTGCAGAAAGATCCTCCCTTGGGGATCAGTGGAGCTCCTCAAGACAACAACATCATGCATTGGAACGCTCTCATCTTTGGACCTGATGACAGTCCATGGGATGGAGGTACCTTCAAGTTGACTCTTCAGTTCACTGAGGACTACCCTAACAAACCACCAGTGGTTCGCTTTGTTTCACGGATGTTTCATCCAAATATTTATGCTGATGGAAGCATTTGTTTGGATATATTACAAAACCAATGGAGTCCCATATATGATGTCTCAGCGATCCTCACATCAATTC…	598	1	AT5G62540.1	UBC3 (UBIQUITIN-CONJUGATING ENZYME 3); ubiquitin-protein ligase		Identical to Ubiquitin-conjugating enzyme E2-17 kDa 3 (UBC3) [Arabidopsis Thaliana] (GB:P42746); similar to ATUBC2 (UBIQUITING-CONJUGATING ENZYME 2), ubiquitin-protein ligase [Arabidopsis thaliana] (TAIR:AT2G02760.1); similar to ubiquitin carrier protein	91.95	149	12	0	72	518	1	149	4e-82	300
MMN1.Contig_1306	GGGGATCATCGTCCATTCCTCACAGGTTCTCCCATCCTTAGGTCGATGATAACCATTCATCTGCTTTGTCGTTGCATAACGATGACTCAGGCTCATATGGTGAACATGACTTTGATACCTCGTGCTACTGATAGGTTGCCTCTGTGTGAGGGACTTGACAATTGCCGCGACTTGCCCTATTCCCACATGTATGACCCACATGTCCTGGCTTTGTTTCTTAATCTCTCCCTAAGGCATTCCGATACTTCCATAATGTCTGTTGAGACTGGCCCCTATTTCTTCCATTACCTCGACGATTGACGGGTTTGCTACTTGACGATGCGTGATGTCTCTTACTCTAATAAACTCGCCTTTCACTACCTGGACGATCTCCCGACTGGGTGTGACCGAGTCAATGAT…	682	1	AT1G11890.1	SEC22 (secretion 22); transporter	member of SEC22 Gene Family	Identical to 25.3 kDa vesicle transport protein (SEC22) [Arabidopsis Thaliana] (GB:Q94AU2;GB:O65393); similar to vesicle transport protein-related [Arabidopsis thaliana] (TAIR:AT5G52270.1); similar to hypothetical protein [Vitis vinifera] (GB:CAN69529.1)	59.47	190	77	0	97	666	1	190	3e-52	201
MMN1.Contig_1307	GTCGAGAGATAATTAAAGGATCCATGCGTTCCCAAAGGCGTAAAACTGTTATTTGGGAATTGTTGCAAGCAAAAGCACATTCGCCCCTTTTTTTGATAGAATAGATAAATTTTTTTTTTTTTCGTTTGATATATGGGGGCTAAAAAAAATTATTAGAAATTTCATGTGGAAAAAAAATTTTTTTTTTGATAAAAACGAAGAAGAACAATCAAAAAAAGAAGAACAAAGACGTATAGAAATTGCGGAAACTTGGGATAGCTTCTTATTTGCTCAAATAATAAGAGGTTTTATTTTAGTAACTCAATCTATTCTTAGAAAATATATTATATTACCTTTATTGATAATAATTAAAAATAGCATCCGTATCGTATTATTTCAACTTCCCGAGTGGGAAGAGGA…	668	1	ATCG01130.1		hypothetical protein	Identical to Putative membrane protein ycf1 (ycf1-B) [Arabidopsis Thaliana] (GB:P56785;GB:Q27GI0); similar to hypothetical protein CabupaCp082 [Capsella bursa-pastoris] (GB:YP_001123433.1); similar to hypothetical protein CrmaCp082 [Crucihimalaya wallichi	55.88	34	11	1	475	564	834	867	0.0004	41.6
MMN1.Contig_1308	GCTCACATTTTATCTAATTGAATCCTGAGATCACTTGTGCCGCCGCATTACTTCTGGTAGGATAAGTTTGGAGGGAGGTTATGCGCTCGACGGCCCCGAAATTTTGGCCGGAAAATCCCACCTTGCGGGCGGGAGAATTTCAGATTGTTTGTACCATGATTGTGGTTGCCTATAATGTTGATCGGATAGTGTGCGGGCACTGCTTTGGACGCTTAGTGGACGTCACGAGACGCCCTCAATGCTTCGAGGCCGCAGTTATGTGCTGCTACATCCCATCCATCTTGGACATTCACTCTGTCAAAGAAGAGGTGACCCCCTCTAAGCTGCGTCTCGAGATCGATGCTGGGATTGCAGACCTACGCTCTGGTCCTCGAGCCTACTCTGACAGAGACTAGTCTA…	727	1	AT3G12260.1	complex 1 family protein / LVR family protein		similar to Os07g0640100 [Oryza sativa (japonica cultivar-group)] (GB:NP_001060420.1); similar to unnamed protein product [Vitis vinifera] (GB:CAO42797.1); contains InterPro domain Complex 1 LYR protein (InterPro:IPR008011)	47.22	36	19	1	243	350	30	63	0.39	32
MMN1.Contig_1309	CCCACTGATAAGAGAAGAAATACTAATGACAGAAAGACGTAGTACTAGGTGAGTGCGCTTAGTCTTCGGCTCGCGCNGCAGCACAGAACCAGNCAGCAGCAGGCAGATGTAGATGCAGAAGGACGACGAGAGACCAGCGCCCGCAGTCATCAATTTCTTTATTAATCAGCAACAATATAACTAACAGAGAGATGCTCTCTCTGCCCGACGCGGCCGCCCCGCACGCACACTCGCGCCGCGGATGAGATAGCGCAGCTTATCACGCACGCGCGGCGGAGAGAGAGTATAGACATGACATCGCTATTCGCTTACTCTGAGTAGATCGCTGTGATTCGTCGCTTGGTGCATGCATATGAGAGTGCGTCATAAGTTGATCGACTCGGACTCCTCGACTCGCGA…	1473	1	no significant hit
MMN1.Contig_131	GATCTCACTCTTGTTCCTATTAAAACTCCTCCTTTGATTTCTTTTGCTCGCTTTTGACTCTTTAAAGAGAACTTTCATGGCTGTGTCACTCTCAGGATCAGCTGTTCTCATTGGGATTGGTTCTTCTTTCTCCAGCGGCATAGCCAAGCAGAGCGGCGTTGGCGCCGTCGGTTTTGGCCGGAAAACTGAGCTCGTCGTCGTCGCTCAGCGCAAGAAGTCGTTGATCTACGCCGATAAAGGTGACGGCAACATTCTGGATGACCTCAATGAAGCCACAAAGAAAGCTTCGGATTACGCGACGGAGAAGACAAAGGAGGCGTTGAAACAAGGCGAGGAAGCAAAAGACTACGTTGTTGATAAGAACGTTGAAGCCAAAGACACTGCAGTGGATGAAGCTCA…	1321	2	AT2G42530.1	COR15B		similar to COR15A (COLD-REGULATED 15A) [Arabidopsis thaliana] (TAIR:AT2G42540.2); similar to cold response protein [Thellungiella salsuginea] (GB:ABX79675.1); contains domain PTHR23241 (PTHR23241)	73.94	142	37	1	77	502	1	141	2e-47	186
MMN1.Contig_1310	GAAGAACATTGAGAGAGAGAGCTATAGTCAGTAGCGAGTGAGTTGCGGAAGANAAGGCCCCAACAGAACGAGTCGGAGAGCGAGAAACCGTTCCCTGGGGGAAAATTTAATAAACCAAAACGACCTGCTAGTGTGAGCACTGGACTACACTGGCAAGCATAGCGATGTCTCGATTACGCCAGTAATTTCACAGGTTGGTAGCAACATTAGATTGGACACAGTCCAACGCTGGTTCCGCTTCTTCCGCCAAAACATTCTAGACATGGCAACCAACGCCCCCCACTACGCGCCTCAGCCGAGGCCCACGCGCCGTCCTACTCCGCCGCCTCTTCGCCGCCATGACCGTCTTCCTCCTCGTCCTAGGCCACATCCTCTTCATCTTCTTCATCGTCGGCCGCC…	864	1	AT2G27260.1			similar to hypothetical protein [Vitis vinifera] (GB:CAN79941.1); contains InterPro domain Harpin-induced 1 (InterPro:IPR010847)	48.98	49	25	0	670	816	176	224	7e-52	52.8
MMN1.Contig_1311	AGAACGAGGGGGATACACGCTAAGTGCAACGCACTCCGGAGACACACAAGTGGAGATGAATGAGGACGGACGCTGGGTGCTAGAGGACTCCCAGTACAGGAAGGATACGATACAAAAATAAGCAGCACTGAGGCAAGTCCTGAATCTTTCAAGTCCACTATGATAAGCGCTTTTGGGTTAAGAAGAAGACGGGCTTCTTCGAGGAAGGATAAAGACCAGGTTGTCCTTAGACCTGATCAAAAGATGACCTTAGGGAACTATCTACTTCATGTGGAAGATGGACTAGCATATTAGACTCTGCCATTATGATGAATCCAACCAGTTACCAGTCCATACAGAAGAGAAAGTCTTCAACACTGAACAAGACTACCGTGATTTTCAGGCTAGACAGGGATGGAC…	763	1	AT1G13450.1	DNA binding protein GT-1		similar to DNA-binding protein GT-1-related [Arabidopsis thaliana] (TAIR:AT3G25990.1); similar to DNA binding protein GT-1 [Brassica rapa] (GB:ABV89646.1); contains InterPro domain SANT, DNA-binding; (InterPro:IPR001005)	68.25	63	20	0	290	478	344	406	1e-28	95.5
MMN1.Contig_1312	GGGGGACACCGTGTTGGCATGATGGGAGTCTGCGTCGATTTCTCGGGTGCTGGCTTTTGAGATCAATTGTGTCGATGTCTGAGTTGATGACTGTGCCTATGGCGACTTCTATAAGGATGAAATTGACGCTTGCTCGTGAACTTTTGGTGCACTCCTCGGACGTCGCCTAGAGACCTCCTCTTCGTCTCCTCGTCGCCGCCTGGGCGCCTCCGTGATGAATGGACGATGATCTCTCCTCGTGTTTCTCCCTCTCCACGACGAAATCGAGGATGATTTCTCCTCGTCTTTCTCCCTCTCCTCGACGCATCCTCGACGAAATCGACGATGATCTCTCCTCGTCTCTCTCTCTCTCTCCGCGATGATTCATTCCGCGTCTCCGGTGTCGATCTCCTTGAGGAT…	489	1	no significant hit
MMN1.Contig_1313	GATATACAAGTTAAGATTTCACAAAAGAGCCAAGAAGAAGAACTATGAGGAAGCGTCAAGTGGTGTTGAGGAGAGCATCGCCTGAGGAGCCTTCTAGAAGCTCCTCGACGGCTTCCTCTCGGATGGTAAGAGGTGTGAGATACGGCGAGTGTCAGAAGAACCACGCCGCAGCAGTTGGAGGCTACGCCGTTGACGGCTGCCGGGAGTTCATGGCAAGCAACGGAGAGGAAGGTACGGTGTCAGCGCTAACTTGCGCCGCCTGTGGCTGCCACCGCAGTTTCCACCGGAGAAAAACCGAGGTTGTTTGCGACTGTGAGTCACCCTCCTCGACGGGAATTTGAACAAGAAAACTAAAAGTTGGTAAAAAAATGGCCCCGGCCATGGGGTAAAAAAAAAAAA…	613	1	AT3G28917.1	MIF2 (MINI ZINC FINGER 2); DNA binding		similar to MIF3 (MINI ZINC FINGER) [Arabidopsis thaliana] (TAIR:AT1G18835.1); similar to unknown [Picea sitchensis] (GB:ABK25649.1); contains InterPro domain ZF-HD homeobox protein Cys/His-rich dimerisation region (InterPro:IPR006456)	89.9	99	8	1	45	335	1	99	9e-35	143
MMN1.Contig_1314	TCAATATTATTTAATTTATCTTGCTATGTAGTAGTATATGGCGCTAGCTCGGCGCAGCAGATCGACCGAGTGAATCGAGTCGGTGAGCGAGGAAGTTGAACTAAAACTTTTTTAATTATACCTTTGGGTATTTTGCTGGT	140	1	no significant hit
MMN1.Contig_1315	AGGGTCTTTTCACCAAAGATTCTCTCCCAATCTCCCTTTAGCTCAACCCTCTCTCGTCTCTCTCGGCACGATCAGAGCTCAGATCTCACAACTCAGATCGAATCAAATCCACAAAGCTTGATCGAACATGACTCTCGGCTCTGGAGGATCGAGTGTCGTCGTTCCGAGAATCTTCCGGTTGTTGGAGGAGCTGGAACGTGGGGAGAAAGGTATTGGAGATGGAACTGTGAGCTATGGAATGGACGATGGTGATGACATCTACATGCGCTCTTGGACTGGCACTATCATCGGTCCCCACAACACTGTTCATGAAGGTAGGATCTATCAGTTGAAGCTCTTCTGTGACAAAGATTACCCTGAGAAACCCCCAACCGTCCGGTTCCATTCACGTGTCAACAT…	737	1	AT3G52560.1	MMZ4/UEV1D/UEV1D-4 (MMS ZWEI HOMOLOGE 4, UBIQUITIN E2 VARIANT 1D-4); protein binding / ubiquitin-protein ligase	MMZ4/UEV1D encodes a protein that may play a role in DNA damage responses and error-free post-replicative DNA repair by participating in lysine-63-based polyubiquitination reactions. UEV1D can form diubiquitin and triubiquitin chains in combination with U	similar to MMZ3/UEV1C (MMS ZWEI HOMOLOGE 3), protein binding / ubiquitin-protein ligase [Arabidopsis thaliana] (TAIR:AT2G36060.1); similar to unknown [Populus trichocarpa] (GB:ABK93802.1); contains InterPro domain Ubiquitin-conjugating enzyme, E2; (InterP	98.11	106	2	0	128	445	1	106	2e-63	209
MMN1.Contig_1316	CATGGCTATGTCACTCTCAGGATCAGGAGTTCTGAATGGGAGTGGTTCGGCGAGCACCAGCGGCATAGCCGAGCAGAGCGGCGTTGGCGCCGTCGGATTTGGACGGAGGACTGAGCTCGTCGTCGTCGCTAAGGGCAAGATGACGTTGATCAACGCCGAGAAAGGGGACGGGAACATACTGGATGACAGCAATGAAACCACAAAGGAAGATTCGGAGTACGCGACGGACAAGACAAAGGAGGCGTTGAAACGAGGCGAGGAAGCATAAGACTACGTTGGTGATAAGAACGTTGACGCCGAAGACACTGCAGTGGATGAAGCTCAGAAAGCTTTGGATTATGTGAAGGCAAAGAGAAACGAAGCTGGGAACAAAGTTGCCGAGATTGTTGAGGGTAAAGC…	664	1	AT2G42530.1	COR15B		similar to COR15A (COLD-REGULATED 15A) [Arabidopsis thaliana] (TAIR:AT2G42540.2); similar to cold response protein [Thellungiella salsuginea] (GB:ABX79675.1); contains domain PTHR23241 (PTHR23241)	62.5	120	45	0	68	427	22	141	1e-35	146
MMN1.Contig_1317	GGTGTCATCACAGATATTATTAACAAGAGGCGAAGACGATACAACAGAGCTTCTCTTTCCTTGCAGTCATGGCGTCGACTTCGACGAGCAAACTTCTTCTCCTAATCTGCTACGTTTCTCTTATCTTCTCTGTATCATCATCATCATCATCATCTGATCTTCGATCTTCTGCGAAAGTGTCGCTGGGCCTGTACTACGAGGAGCTAGGCCCGTACTGTGTCTTCGTCATCGAAAACACCTCACGAAGCTCTTCGAGGACGATCTCATATCAATCGTCGATCTCCCTCTCTCTCCGTGGGGTAACACCAAGCTCCGCTCCGATAATGCCACTGCCGTTTGCCTGCACGGTGCGATTGAATGCTTATCGGATACAGTTGAGGCTTGTGCGATTGATGCGTG…	756	1	AT1G07080.1	gamma interferon responsive lysosomal thiol reductase family protein / GILT family protein		similar to OSH1 (OAS HIGH ACCUMULATION 1), catalytic [Arabidopsis thaliana] (TAIR:AT5G01580.1); similar to unnamed protein product [Vitis vinifera] (GB:CAO21403.1); contains InterPro domain Thioredoxin-like fold (InterPro:IPR012336); contains InterPro dom	80.29	137	27	0	236	646	59	195	3e-66	244
MMN1.Contig_1318	GGGGGAGAGAATACTATAACATACTTCCTGGTGTGTGGATAGTGCAGCACGAAAATGGCAAAGAATGCTGAGCTGTTGCGGAGGCCAAACAAAGATAACCGCCGTTATCGACCGGTTGCGCTACCGCGGTGGAGATCTTGTTCGCAATATTTCCGTTATACTCTGCAGAGATTGGGCGGGAAGCTGACGAGGAAACCAGATGACTGCGAGGAGAAGTATATACATGCTTACGGAGGAAAAGGCCCTGTGGCCTCCACTGTCACTGACAAGGTCAGTTACGACCACGGTGCTACCTCCTGTGACATTAGGAACTGGAAGACGGCTTCTCGCGTTATGAACTCAAAACCACTCCTGGATGATCTGAAGTTATCCCTGTCAAAAAAGGGAAAGTTGCCACGA…	755	1	AT1G11840.5	ATGLX1 (GLYOXALASE I HOMOLOG); lactoylglutathione lyase	Encodes a glyoxalase I homolog ATGLX1.	similar to lactoylglutathione lyase, putative / glyoxalase I, putative [Arabidopsis thaliana] (TAIR:AT1G67280.1); similar to putative lactoylglutathione lyase [Brassica rapa] (GB:BAF81517.1); contains InterPro domain Glyoxalase/bleomycin resistance protei	38.1	84	52	1	55	306	1	83	2e-07	53.1
MMN1.Contig_1319	AGGGAAAGCGAGGCAGAGCACGAGACCAGGACGGGCGCAGCGCGCGCAGCCGACCGACGGAGCGCAGCGAGCCAGGGAGCTCCCACAAAGGGGAGAAGGGGGGGGGGGGGNGGGGGGGGGGCCTTAAAGGGGANGGGAGGGGAGAGAGGGGAGGGAAGAGGGNAGGAGGGAAGGGGAAAAAAAGAAGAGAGAAAAGAAGAGAGAGAGGGAGGGAGAGGAAGGGAGGGAAGGGGAGGGAGAAGAGAGAAAGGGGAGAGAAGAAGAAGGGGAAAAGAAAAGAAAAAGAGAAGAAAAAGAGAAGAGAGAAGAAGAAAGGAAGAAAAGAAGAGAGAGGAGAAGGAAAGAAGGAAGAGGAAGAGGAAGGAGAGGGAAGGGAGGAGGGGAAGGGGAGAAGAAGAA…	884	1	no significant hit
MMN1.Contig_132	GGACAGCACATAAAAGCATCAAAAGAAGAAGAAACAAAAATTACAACTATTTTAAATCAAAGAGAAGTAAGAGAATAAATGGCAGGTTCTAACTGTGGATGTGGTTCCGCTTGCAAATGTGGTGACTCTTGCAGTTGCGAGAAGAACTACAACACGGAGTGCGACAACTGCAGCTGCGGGTCAAACTGTAGCTGTGGAGACAACTGCAGCTGTTGAAGGAAAACCACATGCATGCAGGAAAACCGAGGGGAAATATGTGTTTGATGATAAGATACGTGTGTGTGTTTGAATAAAGATTTGGGTTTTATGTTGCCTAATACCTCTCTTAACGTTTGACTTTTCCTGCTTTATATCTTTATATGTGTGGTGTGTAATGTTTTCATTTGTAACCTAAGAAAA…	508	17	AT1G07610.1	MT1C (metallothionein 1C)	one of the five metallothioneins (MTs) genes identified in Arabidopsis. MTs are cysteine-rich proteins required for heavy metal tolerance.	Identical to Metallothionein-like protein 1C (MT1C) [Arabidopsis Thaliana] (GB:Q38804); contains InterPro domain Plant metallothionein, family 15; (InterPro:IPR000347); contains InterPro domain Mollusc metallothionein, family 2; (InterPro:IPR001008)	92.59	27	2	0	79	159	1	27	5e-11	63.9
MMN1.Contig_1320	GAGAGAGAGGTGTATTGAATCAGAAAGAACAAAAGGAGAGATGGCTAGATACGATCGAGCAATCACTGTGTTCTCACCAGATGGTCACCTTTTTCAAGTAGAGTACGCCCTAGAAGCTGTCCGGAAAGGTAACGCCGCCGTCGGAGTCCGCGGTACCGATACTGTCGTCCTCGCCGTCGAGAAGAAATCCACCCCTAAGCTCCAGGATACAAGATCAGCCAGAAAGATTGTGAGTCTTGATAACCACATTGCCTTGGCCTGTGCTGGACTGAAGGCAGATGCTCGGGTCCTGATTAACAAGGCCAGGATAGAGTGTCAGAGCCACAGGCTTACGTTGGAGGATCCAGTGACTGGTTGAGTACATCACTCGGTACATAGCTGGGCTTCAACAGAAGTATA…	733	1	AT3G51260.1	PAD1 (20S PROTEASOME ALPHA SUBUNIT PAD1); peptidase	20S proteosomal alpha subunits. Interacts with SnRK, SKP1/ASK1 during proteasomal binding of an SCF ubiquitin ligase.	Identical to Proteasome subunit alpha type-7-A (PAD1) [Arabidopsis Thaliana] (GB:P30186;GB:Q41942;GB:Q8LB36); similar to PAD2 (20S proteasome alpha subunit D2), peptidase [Arabidopsis thaliana] (TAIR:AT5G66140.1); similar to proteasome, alpha subunit-lik	98.41	63	1	0	354	542	105	167	2e-93	130
MMN1.Contig_1321	ACTGTATTGTCCTAAAGGGTCAGGGAAACTTCTCTCTCCTTATCTTCACAAGTCCCATCTTCGTACGGAGCTTGAGATGTTGGGACCAATGAGTTTCGCTGAGAAGATGGTCTTGTCTGTGTTTGGTGGTTTGGTTGTGTTATGGATGACAAGAAATATAACGGATGATATCCCTGGGTGGGGTTGCATCTTCTACGGCCGGGCTGGTGATGGAACGGTGAGTGTGATGATGGCTACGTTGCTGTTTATAATCCCAAACGGTATTAAAAAGGGAGAGAAGCTAATGGATTGGGGTAAATGCAAGAAGCTTCCGTGGAACATATTGTTGTTACTAGGAGCTGGATTCGGTATAGCTGATGGGGTACGTACAGGTGGACTAGATGAAATTTTATCCAAAGG…	722	1	AT5G47560.1	ATSDAT/ATTDT (TONOPLAST DICARBOXYLATE TRANSPORTER); malate transmembrane transporter/ sodium:dicarboxylate symporter	Encodes a tonoplast malate/fumarate transporter.	Identical to Tonoplast dicarboxylate transporter (TDT) [Arabidopsis Thaliana] (GB:Q8LG88;GB:Q9FEH9;GB:Q9FGK1;GB:Q9MAW4); similar to vacuolar citrate/H+ symporter [Citrus sinensis] (GB:ABK27327.1); similar to sodium-dicarboxylate cotransporter, putative [	75.52	241	54	2	2	709	286	521	2e-87	318
MMN1.Contig_1322	TGAGTACAATCTAAATCCCTTAACGAGGATCCATTGGAGGGCAAGTCTGGTGCCAGCAGCCGCGGTAATTCCAGCTCCAATAGCGTATATTTGAGTTGTTGCAGTTAAAAAGCTCGTAGATGAACCTAGGGATGGGACGGCCGGTCCGCCTTTGGTGAGCACCGGTCGGGTTGTCACTTCTGTCGGCGATAGGCTGCTAGCCTTAACTGGGGGGGGCGGGCCTCCGGCGCTGGGACTTTGTAGAATGAGAGCGCTCAAAGCAGAGCCTACGCTCTGTATACATTAGCATGGGAGTGCATAAAAGAATTTCGATCCAATTGAGTTGGCCTTCGGGATCGTGAGTAATGATTAACATGAAGCGGGAGGGGGCATTACGTAATGAAATTCAGAGGAGAAACA…	429	1	AT3G58400.1	meprin and TRAF homology domain-containing protein / MATH domain-containing protein		similar to meprin and TRAF homology domain-containing protein / MATH domain-containing protein [Arabidopsis thaliana] (TAIR:AT3G58350.1); similar to MATH domain containing protein [Brassica oleracea] (GB:ABD65138.1); contains InterPro domain MATH (InterPr	30.61	49	34	0	249	395	228	276	6.1	26.6
MMN1.Contig_1323	GGAAGAGGTCCGTTTGATATCCAAAAACTGCTCAGAAACAGTCAGACAAGTGTGAAAAGCCGGGGAAAACAGGACCAGATGGGCGAGAGGCGGATCGAAACGTTGGCTGGAGACAAGTCCTAGGACATAACCACGCGTCGGTGGAGCTCGGGAAACTAGCGCCATGGACGATGTAAGTGAAGGTGAGGGATCGGATAGTGAACTGGCGCACCCTGCCTGGGGGCATCCAGCGCTGGGAAGATGATGAAGAAGTAAGTAAAAATATAGAGGGACTTGGAGGGTTGCGCTACGTCAGTAGATAAAAGAGAAAATCGAAGGGATTAGTGTTTCGAAGATGAGACATAGGAGTATATTGACTGAGACACGCTAGACTAACCTATAATTATTTGTGTAGCTAGA…	699	1	ATCG01310.1		encodes a chloroplast ribosomal protein L2, a constituent of the large subunit of the ribosomal complex	Identical to Chloroplast 50S ribosomal protein L2 (rpl2-B) [Arabidopsis Thaliana] (GB:P56791;GB:Q8HRX3); similar to ribosomal protein L2 [Draba nemorosa] (GB:YP_001123591.1); contains InterPro domain Translation protein SH3-like (InterPro:IPR008991); cont	41.94	93	51	2	5	274	178	266	3e-07	52.4
MMN1.Contig_1324	AAAGGGGGGGGGGAAAGAGAGGCCCTGAGTACGAATCGACGCAAAGAGAGCCCCCCCTCCCCTACTCGTCACAAGTAACCATCACATAAACACGAATGTTTCTCCTCTAGCCGGGCGCCGAGATATCGCGGCGGTAGATCGCGGGATTTTCCGGCCTGTCGAAGCCTGGATTAAATCGTTTCGTAAGTGAGGCACCAGGGGTGACGAGATTGGTAGGCCTCCTCGCCTCGAAGTCAACCGGGCCGAGGAGAAGCAATCCCCTCCGACGGACCTCTCGATACTACTAGGCGGCGCCATGTTAATATCGAGATGCGCGAGGCGTGGCTCAGCTAGTTGATACTGACGCTAGAAGGCCATTGAGCAACAGATGACGCGCGAGCACCATCTGAGTTAGAGACT…	979	1	AT1G23860.3	SRZ-21	Encodes a 9G8-like serine-arginine rich (SR) protein that interacts in vivo with U1-70K, a U1 small nuclear ribonucleoprotein 70-kDa protein that is involved in nuclear precursor mRNA processing.	similar to SRZ-22 (SERINE/ARGININE-RICH 22) [Arabidopsis thaliana] (TAIR:AT4G31580.2); similar to SRZ-22 (SERINE/ARGININE-RICH 22) [Arabidopsis thaliana] (TAIR:AT4G31580.1); similar to unnamed protein product [Vitis vinifera] (GB:CAO40907.1); contains Int	47.22	36	19	1	55	162	116	150	1.8	30.4
MMN1.Contig_1325	AAGAGCGAGGGGTGGGCGGACGGATGCGGACGAGTCAGTATAGGGCAGCTAGATGGTCGCGAGCACAACCGACCGCACTGCATGCGTAGGCGAGTGGAGCGAGGCAAGCGAACCGCGATATACTTACGTATCAGCATACGATTACTACATAAGTCTATCAGGGCGACCGCCACCAGGATCATGATGCCCAGGGCACGGCGGAACATCGAGCGGTACGGGAGGAGGATCAAACGTGGCGCATGATGCAACCGCCCCAGCGCTCCGGGCTTCTTGGACGGGCGGCCCCTCGCTCACGATGGAGGAGTAGATCGGTACCGACAAGGCTCCTGCCGACCGCAGGTGGCGGTGATGAGAGGACGCAAAAAAATAAGGCAACCGCCGCCTCGATGGAGAGCGGCA…	1141	1	no significant hit
MMN1.Contig_1326	ATAATTCCGTCACGGCGGGAGGTATCTCATTTGTACGTCAACGGCTTACCCTACGATGCTCCGGTGATGGTCTCTAACCGTGGCGGATTCTACGAGTTTTGCAGCTCCTCTAACATGATCAGAGAGATTGGATCCGTTACATATATCGTCTTGTGGTGTTATTGAAGGCGGCAATAAAGCTGTCACTGAAGTTGAGACTGGATACAGAGAGTAGGGTGTGTGACAAGGTATATATCAGGCCTCATGTGCCCAACTAACAAATCCTCTTGTAGAGGATTGACGACGTTTGAATGCACAGGAGTTGGAGCGGATTGACCGGCTACAAAATGGCTCTCGACATGTTGTGGGCACCACTCGAGACGGAGTTCATGCTTGAGCAGCTCTCTAACCTACCCAGTT…	705	1	AT5G15800.2	SEP1 (SEPALLATA1)	Encodes a MADS box transcription factor involved flower and ovule development. Functionally redundant with SEP2 and SEP3.	Identical to Developmental protein SEPALLATA 1 (SEP1) [Arabidopsis Thaliana] (GB:P29382;GB:Q9LFU6); similar to SEP2 (SEPALLATA2), DNA binding / transcription factor [Arabidopsis thaliana] (TAIR:AT3G02310.1); similar to SEPALLATA1 [Arabidopsis lyrata subs	31.03	29	20	0	354	440	142	170	4e-09	21.6
MMN1.Contig_1327	GACAACCCGAGTGACTGGGCAGCATCATCGTCTTCGGGATCCAAGAACTGCTACGGAGAGACAGATCCGATCACAGGATCTGCGTATCCAGTGAGCCCCTACACAGATCAGCTAAGATCAGTGATTGTTGAAGTGCTTCACGGGATGCACAATCCGGCATTACTTCTTGACATCACGCTCCTCTCTTCCCTCAGGAAAGACGGACACCCTTCTGGCTACAGCGGTCTTGTTAGCGGTTCACAGCTGGCCAAGCCAGGCCAGTCAGATTGTAGCCATTGGTGCTTGCCTGGTCTCCCTGATACATGGAATCGGTTGTTGTACACCATTCTCTTCTACTAGCGTTGTACTTTTATTATTATCTTCTTCTATCAGTTTATTCGAGTAGGAATATTTCTAACG…	545	1	AT5G58600.1	PMR5 (POWDERY MILDEW RESISTANT 5)	Belongs to a large family of plant-specific genes of unknown function. Involved in resistance to the powdery mildew species Erysiphe cichoracearum and Erysiphe orontii, but not to the unrelated pathogens Pseudomonas syringae or Peronospora parasitica.	similar to unknown protein [Arabidopsis thaliana] (TAIR:AT2G30010.1); similar to unnamed protein product [Vitis vinifera] (GB:CAO21434.1); contains InterPro domain Protein of unknown function DUF231, plant (InterPro:IPR004253)	87.61	113	13	1	1	336	290	402	2e-45	178
MMN1.Contig_1328	GACCAAAACCCTAATCTCTCCCAAAGCTTCTCTCCCAAAACGAAATGGTTGACCCTAAAGTTTACTTCGACATGACCGTTGGCGACAAAGCCGCCGGCCGCATCGTCGTGGAGCTTCACGCCGACACAGTCCCCGAGACGGCCGAGAACTTCCGTGCCCTCTGCACCGGCGAGAAAGGAATCGGCAAATCCGGAAAGCCGCTCCACTACAAGGGCGCGGCTTTCCACCGCGTGATCCCCAGGTTCATGTGCCAGGGAGGAGATTTCACCGCCGGGAACGGAACCGGAGGAGAGTCGATCTACGGCATGAAGTTCAAAGACGAGAACTTTGTCAAGAATCACACCGGTCCGGGTATTCTCTCCATGGCCAACGCTGGTTCGAACACGAACGGATCTCAGT…	752	1	AT2G16600.1	ROC3 (rotamase CyP 3); peptidyl-prolyl cis-trans isomerase	Encodes cytosolic cyclophilin ROC3.	Identical to Peptidyl-prolyl cis-trans isomerase CYP19-1 (CYP19-1) [Arabidopsis Thaliana] (GB:Q38900); similar to peptidyl-prolyl cis-trans isomerase / cyclophilin (CYP2) / rotamase [Arabidopsis thaliana] (TAIR:AT2G21130.1); similar to cyclophilin [Thell	85.21	169	25	0	51	557	4	172	5e-76	280
MMN1.Contig_1329	GAACACAACTCAACTCACTCAAAACCCTAAAACAAACACAAACAAAACAATCAAAATGAAGAAACCTTCAGTGACCCCTTTTCTCATCACTCTCCTGTTGGCTGCAGCTGTCTGCACCCACGGCAAAGAAGAGGTGAAGGACTCCAACGGAAATCCAGTTAAAATCGGTGCAAAATACTTCATCCAGCCGGCTAAGAGCAACGGCGGTGGTCTTGTTCCAGCCGCCATTAGCGTACTTCCGTTTTGTCCACTTGGCATCACCCAAACACTTCTTCCGTACCAACCGGGCCTGCCGGTTAGCTTCGGATATTATCCACCTTTCGTCGGCACAGACTACATTGTCACATCTACCACTATAAACCTCAAGTTCGAGTCCGACCTCTGGCCTGTATGCAACGA…	745	1	AT1G72290.1	trypsin and protease inhibitor family protein / Kunitz family protein		similar to trypsin and protease inhibitor family protein / Kunitz family protein [Arabidopsis thaliana] (TAIR:AT1G73325.1); similar to water-soluble chlorophyll protein [Raphanus sativus var. niger] (GB:BAB72020.1); contains InterPro domain Kunitz inhibit	59.91	212	79	4	65	682	4	212	7e-57	217
MMN1.Contig_133	GAAAAGAGTGATTATTAATGGCGACTTCAGGGTTTAAGCATTTGGTGGTTGTGAAGTTTAAGGAAGATGCTAAGGTTGATGAGATCTTGAAGGGATTAGAGAATCTTGTTTCTCAAATTGATTCTGTCAAATCCTTTGAATGGGGAGAAGATAATGAGAGTCACGAGATGCTTAGACAAGGATTCACTCATGCATTCTCGATGACTTTTGAGAACAAAGATGCTTACGTTTCTTTCACAGGCCATCCTCTTCACGTTGAGTTCTCTGCCGCTTTCACCGCCGTCATCGACAAGATTGTGGTCATGGACTTCACCGTCGCCGCCGTCAAATCTCCCGTTGTTGTAGCACCGTGAAAACTCATCGTACTTGTTTCTTAATTAATCTCGTTTTATAATTTAA…	626	5	AT5G22580.1			Identical to Uncharacterized protein At5g22580 [Arabidopsis Thaliana] (GB:Q9FK81); similar to stable protein 1-related [Arabidopsis thaliana] (TAIR:AT3G17210.1); similar to hypothetical protein [Vitis vinifera] (GB:CAN68720.1); contains InterPro domain Di	90.82	98	9	0	18	311	1	98	2e-47	185
MMN1.Contig_1330	GATTGCAGAAAAAGATGAGCTCGTCCCCGTTAGCGTCATCTCTCTTTCCATCTTCTCTTGCTGCCGTCTTGTCTCATGAGCATGTATCGGGGTTGACAATTATGTGTTAGTCTGAGACAACTCCAGCTTCCTGTTTTTTCTCACAGGATTCAGGATGTGGTGAGCTTGACCACAGCACTGCTCATGATCGAGACTGGGTTCCGGCGACTCACAACCGCGAGATAGATTTCTGGACCATTCGCTGGTGCCTGGGTGGCCAGGGGCAAGTTAACTCCGTCATTGATAGTTGTGGACTGAGAGAGAGGTCGTGTTGATCGGGGGCATGTTCGGAAAAGGGGGTGACTCTGGAGCTGTAATCTCTTTTTGAGCAAAGCCGAACGTTGTCCAGCCGTTCTCACT…	595	1	AT4G03440.1	ankyrin repeat family protein		similar to ankyrin repeat family protein [Arabidopsis thaliana] (TAIR:AT4G03480.1); similar to unnamed protein product [Vitis vinifera] (GB:CAO23944.1); contains InterPro domain Ankyrin (InterPro:IPR002110)	44.12	34	19	0	448	549	337	370	3.1	28.5
MMN1.Contig_1331	CTTGATCGAGAGGCCTCAGCCTAGGCCAGGGAAAGGGGTGACCAATACCTGCAAGGTTTGCTATCGTAGCCTCGGTGATCATAGCTTCAGCTTCTGCTCTCTTGGGTGCCCGAGTGCTGGATCATCTTGAGGCTCTGAAAAGGGAAGGAAGAACCTTTGGATGGAGACACACGATTCAGGGAGTATTGCCCCGACAACGCCTCCGCTTACGGGGACTAGGAGGTGCAGAATCATCGAGCTGACATTGGGCATCCCACACCGATCGCCCCTGGTAATCTAAACGATGGTAAGAGTTTGAGTACGAGATGACTACACAGAAATGTAGGGCCTAAACATGCTCTCTGGGCCTTTATCTGGGAGCCATTGCCTCCAACTGCTGCCTTGATGACTGCTATCGAT…	715	1	AT4G17900.2	zinc-binding family protein		similar to zinc-binding family protein [Arabidopsis thaliana] (TAIR:AT1G32700.1); similar to zinc-binding family protein [Arabidopsis thaliana] (TAIR:AT1G32700.2); similar to unnamed protein product [Vitis vinifera] (GB:CAO63403.1); similar to hypothetica	62.14	103	26	1	2	271	63	165	1e-29	126
MMN1.Contig_1332	CTGGCGGGGGGAGGAATCAAAACACGACTACCAGTGAGAGCAAGATATTGAATGGGTAGAATGAAGGGATTGCCGGAACTCGAATAAACATCGGCGGAAGGCTGAGATCTCCGTAAGCGTTAGGTCGTGTCAGGAGGCGAAGATGTCAATGAGAGCGGACACCGTCCTGGAGCAGCGGAGCCGGATCACGATGGGAACATCGTGCCTTATGCTGCTAATTGTGGTTAGCGGGTCTAAGGCGTCCACGCTGAACCTAACGCCGTCTCTGTCGTCTGGATTGCTGGGACCGTGAGTCGCGGAGGTGGTGCCGTAAGATGATACCGATCTAAGACTTTTTGCTGCCATGGTCATGAATATGGTTAAAAGTAGATGTCATGACTCTCACGGTAGAGAGCTCTT…	709	1	AT2G47710.1	universal stress protein (USP) family protein		similar to unknown protein [Arabidopsis thaliana] (TAIR:AT5G49050.1); similar to universal stress protein family protein [Brassica rapa] (GB:ABV89633.1); contains InterPro domain UspA; (InterPro:IPR006016); contains InterPro domain Universal stress protei	48.15	27	14	0	384	464	93	119	0.0002	30.4
MMN1.Contig_1333	GGCGGGATGAATAGGTGGAGCGATGGCGATGATAGTAGTAGTGGGGACAGAAAACTATCAAAGCCCAGTGCTGTGTGTATCTACTATGCAGAAAAATGGCAGAAAATGCTGATTTGAAGGAGCTGCATAAAGAAAGAAACGCCGTCGACGTCTCCATGGTGCGAGCGGCGATGGTGATCCTGATCGCGCTGTCCAGCTGAACACTGGGGGCTTGGGCATGAAGCTGTTGAGGAGGAGAGATGTGCCTGAGGAGAAGTACTGTTATGCTTTCCTTGGATTAGGAGCTGAGACCTCCAATTTCTGTGTCGAGCTCACCTACAATTGTGGTGTGATCTCATATGACATTGGAATTGCGATTGGGCATTTCGTTATTTGAATTCAAGATGTGAATAAGAGGGA…	729	1	AT1G11840.4	ATGLX1 (GLYOXALASE I HOMOLOG); lactoylglutathione lyase	Encodes a glyoxalase I homolog ATGLX1.	similar to lactoylglutathione lyase, putative / glyoxalase I, putative [Arabidopsis thaliana] (TAIR:AT1G67280.1); similar to putative lactoylglutathione lyase [Brassica rapa] (GB:BAF81517.1); contains InterPro domain Glyoxalase/bleomycin resistance protei	65.91	132	45	0	152	547	19	150	3e-58	176
MMN1.Contig_1334	TATATCTTTTTTTCTTTTTTTTATGACTCACTTAGGGCGCTATCTCGTCGCACCAAACAAACAGAGCGAAGCGTCTCAGAGAGAGAGAACCGCCTCGTATAATTTTGTATACTATATTTTAAGAAATTATTCCGACGGCCACCGCCCCAGAAATGTGGCAGGAAATCCGTCATTGCCGGGGGGGAAAATCTCTTGATTGTATTCTCTTGATTTTAAACAGAGTGATCGATTCATAATCGTTAATGTGTTCGGAGAACATCGTCGGCTTCGCAGAGATCTGCCCAAGCGTTCCCATAGGACTAGTGCCCGAGAAATAATTCCACTTTGTTGACTTTCAGAACACAAGACGCTAGCATATCTAAGTGGAGATCACGGATCTAAAATACCTCGAACGCCCCT…	882	1	AT2G01120.1	ATORC4/ORC4 (ORIGIN RECOGNITION COMPLEX SUBUNIT 4); protein binding	Origin Recognition Complex subunit 4. Involved in the initiation of DNA replication. Regulated transcriptionally during cell cycle, peaking at G1/S-phase. Target of E2F/DF family of transcription factors. Interacts with all ORC subunits except ORC1b.	similar to unnamed protein product [Vitis vinifera] (GB:CAO42220.1); contains domain PTHR12087 (PTHR12087)	29.51	61	39	2	677	847	226	280	5.8	28.5
MMN1.Contig_1335	GATATAAAGCTTTTGCAGTATTGAGAAAATAAATAAAATACTGCTTTAGTTTTGAAACACAACCTCATTACATTATTAATCTTTACAAAAATGGCACGTCAATTTATCGTTTTTGCCCTTTTGGCTTTGGCTGTGGCCAACCGCTTTCGCTGTCTACGCACCTTCGACTGCAACCTCTGCTTCTCCGACCAAATCACCCACCACACAAACCAAGGCTCCCGACACCGCACCCAAAACCTCCTCCTCCGCCTCCGCACCCAAAGCATCGTCCCCTGTCGCAGTAGGAACCAACCCCCGAAGATCATTAATCGGCAACCAACCCCAATGACTCTGCAGAGCGACCCAGCGTATCCTCTCCACCGGCTCCTACCCCGGAAAAAAACTCCGGCTACTGACCAT…	649	1	AT5G14380.1	AGP6 (ARABINOGALACTAN PROTEINS 6)		Identical to Classical arabinogalactan protein 6 precursor (AGP6) [Arabidopsis Thaliana] (GB:Q9LY91;GB:Q9XFR4)	54.17	72	33	0	288	503	78	149	2e-13	72.8
MMN1.Contig_1336	ATAAATCATATACTAAGAGGCGGTATCTCCTCGCCCCCAAAACACCGACCAGCGCAGTCGCAGAGAAGAAGAGAAGGGCCCGCAAAAATTTCCTTAATAAAAAATTTAATAAAATTATTTATCAAAGGACCCGACAAATATTCCCGGGAAATTCGCCCTATTACGCCGGGGGAGCAACAACTTATTCCTTATATACTAAATAAATAAAAAAATACTATAGGATTATATCATTGCGTCATTACTTATATAATCTATACTAATATCGAAGATCAATCTATAGATATTACCCTTTTGAATTTAACATGTAGTGACAAGAAGCTAATCTATAAACATCTTCAACTCCAACTTTTGCATAACCGACCAGATCACGCACCATGCACTCTTCCAATGCCGATTAGA…	929	1	AT3G46530.1	RPP13 (RECOGNITION OF PERONOSPORA PARASITICA 13); ATP binding	Confers resistance to the biotrophic oomycete, Peronospora parasitica. Encodes an NBS-LRR type R protein with a putative amino-terminal leucine zipper. Fungal protein ATR13 induces RPP13 gene expression and disease resistance.	Identical to Disease resistance protein RPP13 (RPP13) [Arabidopsis Thaliana] (GB:Q9M667;GB:Q9M668;GB:Q9SNC5); similar to disease resistance protein (CC-NBS-LRR class), putative [Arabidopsis thaliana] (TAIR:AT3G46710.1); similar to disease resistance prot	32.56	43	29	1	326	454	506	542	0.96	31.2
MMN1.Contig_1337	AAGATATGACTGATACAACTAACCTATTCACAGTCTGACTCTAGAAACATATGCCAAGATATCCTCTAACACATCGCATCTGCGACACCTGAGCAGACACATCTTGAAT	109	1	no significant hit
MMN1.Contig_1338	CATCTAGAACAATCCAAAAGATTGCTGATGGTTTGGATCCGGAGTCGGGACTTTCACAACTCTATATAGGTTATAATAATCCTATTTCAGGGAGTGCTATTCAAAACCTCTTGGCTAAAATAGCTACTCTAAGCAGCTTTACAGAACTGAGCATGAATGGCATAAAGCTGAGCAGCCAAGTTGTTAGTAGCCTCTCCGCACTTGTTAAGACTCCATCTTTATCAAAACTTTTGGTTGGCAGCAGTGGCATTGGAACGGACGGAGCTATCAAAATCACTGAAGCTCTATGCTATCAAAAGGAAGAAACTGTTAAGCTCGACCTTTCATCTTCTGGACTAGCGTCTCCTTTCTTTCTTAAGCTCATCCAAGATGTTACTCTAACTTCTAGCATTCTTGAGC…	757	1	AT3G18730.1	TSK (TONSOKU)	Encodes a protein with an important role in cell division control and plant morphogenesis and may also play a role in genome maintenance. May be involved in mitosis through interaction with TSA1. In cells synchronized for cell division, TSA1 and TSK relo	Identical to Protein BRUSHY 1 (BRU1) [Arabidopsis Thaliana] (GB:Q6Q4D0;GB:Q6IE93;GB:Q769D5;GB:Q7XAG5;GB:Q9LSA4); similar to EMB2004 (EMBRYO DEFECTIVE 2004), protein binding [Arabidopsis thaliana] (TAIR:AT1G10510.1); similar to unnamed protein product [Vi	78.57	252	53	2	3	755	966	1206	2e-98	355
MMN1.Contig_1339	GAATGCATTGGATGGATGCCCGGGCATTGAGAAGGAAGGACGCTTTCAGAGGCGAAAGGCCATGGGGAGATACCGTCTGTGATCCATGGATCTCCGATCGGGAAACCGTATCCAAGCTCCGTGGCTAGTCTGCGCTCTTTGGACTTTGAAAACTTAGCGAACTGAAACATCTAAGTAGCTAAAGAAAAGAAAATCAACCAAAAACCCCGATAGCATGGGCGAGCCATAGCGCATTTGGAATTTGACCAAACCATACAATAGAAAACAAGAAACCAAACGGGACGGCCACCTGGGCCCTCCTGATACTTACGAGACCCTGGTCTTGACTAGCGGTTGCATTCTCACAAAGAAAAAGGGCCCGGCTGTTTCCTAGGATACCCAGGAAATGACTATGGATTG…	679	1	no significant hit
MMN1.Contig_134	AACTGAGAGTTGGAGAGAGCGAGAGAGAGGGGAAGGAGGATGAAGAGGACGGCGATGGACAACGCGATTCGATCATCGGTGGTGGTTTTGGGATCATTGGCGTTTGGGTACATGTCGCTGGAGCTTGGATACAAGCCTTTCCTTGAAAAGGCCGAACAATACGAACGATCTGTTCAGTCTCAAGCTTCTCAGCRCCAACRAGAACAAGATGGACAAGAAGAAGCGAGATGGGACAATAACAATATCGAGGGATGGGAGGAGAAAAAGTAGATGACAGAACCTATGAATGTGCAAGCAAGGAAGAAACCTTGTTGCTTCTTTTGTTTTCTTGGTCTCAGATCATTCTGTAACCGTCATTCACTCAGTTTTACCCCAAGTATAGTATAATTTCTCTGAAGA…	703	2	AT5G19151.1	unknown protein			79.45	73	15	1	49	267	4	74	4e-21	98.2
MMN1.Contig_1340	GGTTTTGAAAAACAAACTCTTGAGAGGAGAAGGAGATAGCGATTAGAAGGAAGGATGATAGAGGAAGGTCCACCGGCTCCAAAGGTTCTCCGTATGGTCTACTTCGTCGGCGCCAGATTTTTATGTACTTTCGCGATCAACAAATGGTGTGAGATGGAGAAAAAATCAAATCAGAAACAGCAGGAGAAGAATCAGCAAGCAGATGGAGAAGGTTTATTGCATCAAATTCCTGCAGATTCGGTTCAGAAAGCAATGAAATGATGATTTTATTTTCTCTTTTGTCTGTTGCTATGATCCCAGATGCAAAAGATAACTCAACTCTAGTTGTATCTTTGACCTCAAAGTTTGCATTTTCTTTT	359	1	AT1G16916.1			similar to hypothetical protein MtrDRAFT_AC151598g7v2 [Medicago truncatula] (GB:ABD32939.1)	69.12	68	21	1	55	258	1	65	3e-15	77
MMN1.Contig_1341	GTGTGGGTGATAACTCTTTTTCACTGATAGTCTGATACCATGTTGTGTGTTGGAATCCTTTAGTTCCACACAGGATTCTAAAGCGATTTAGGGGGGGTTACTCTTTTTTTTTTTTATGCGAGTTTCCTTTATGTTCTGAAGTACTTACTTTTGGTCCAG	159	1	AT3G28880.1	protein binding		similar to ankyrin repeat family protein [Arabidopsis thaliana] (TAIR:AT2G03430.1); similar to hypothetical protein [Vitis vinifera] (GB:CAN60905.1); contains InterPro domain Ankyrin (InterPro:IPR002110)	50	24	12	0	42	113	5	28	8.5	25.4
MMN1.Contig_1342	CGAGGACCATGTCGACGAAACTCCAAGGTCTGTGTACAAGACGATCCCAGACTGTGAACCATGTCGGCCACTACAAAGCATCTCCTATTATAGGATTCTACTTACGCTGGGGATTACACTAAAGCAAAAGTACTTAGCTTCCATGGAAGGCACCCTGCTCTCTGGTAAATTCTGCTCTCACTCTATTCTACAAGATTACGAGCTATTGGATGCTTCCTCTGGACCGCAAAAGTTGTCGGAAACGACTCTATGAACATATCAAAGGAAGCTTAAAATATTTTGAAACTTTTGTGTACCAACCTCAGTTCAATACAAAGTTACTGATTTGGTAAAAAGGGAACTATGTATTGCCGGGAAAATATGGAATGCGCTTGATTAATATGAGTACTATCCGAGATC…	565	1	AT4G14210.2	PDS3 (PHYTOENE DESATURASE)	Encodes phytoene desaturase (phytoene dehydrogenase), an enzyme that catalyzes the desaturation of phytoene to zeta-carotene during carotenoid biosynthesis. Processed protein is localized to the plastid.	Identical to Phytoene dehydrogenase, chloroplast/chromoplast precursor (PDS) [Arabidopsis Thaliana] (GB:Q07356); similar to ZDS (ZETA-CAROTENE DESATURASE), carotene 7,8-desaturase [Arabidopsis thaliana] (TAIR:AT3G04870.2); similar to ZDS (ZETA-CAROTENE D	69.14	81	25	2	8	250	485	563	2e-23	105
MMN1.Contig_1343	GGACTCCAACAGTTTTCCTCCTCTCTCTCTCTCTCTCTCTGTTTCCTTCCACAATCTACTTTAATCCAAGATAAATTCAAAAGTTCATCCTTTCCCAGACTCCTGCCCCCTCATACTAGCTTTCTCCCCCATTAATGTGCCTCACTTGCCCCATCTCGTATGTTAACTTTGAACAAGGGATTTTCCTATGTTTATTCTGATCTGGACTATGATTGTGTTTCTCACCAGTACAAAGCCCCTGGCGTGCACCCTCCGTTCTGAACTGATCTCGAGGCATTTTATTGGGAATTACTGAATCTTCTTTCAATACTCAAAGTTATATCTATCTCGTATTATTTCCCGACGTTCCTCTAATTGCAGCAATTGCTTCTCTCTTTTCCAGTTTTGCTCGATTGAAAC…	560	1	ATCG00170.1		RNA polymerase beta' subunit-2	Identical to DNA-directed RNA polymerase subunit beta'' (rpoC2) [Arabidopsis Thaliana] (GB:P56764); similar to NRPA1 (nuclear RNA polymerase A 1), DNA binding / DNA-directed RNA polymerase [Arabidopsis thaliana] (TAIR:AT3G57660.1); similar to RNA polymer	35.29	85	52	1	270	515	1263	1347	1.3	29.6
MMN1.Contig_1344	GGGAGATAGCAAAACAGCAATGGCGAATCAAGTGATCTCTGGAATCAAGGAAACGGTTCAATCGATCAACGGCGCGGCTCGTCCATGGGGAGACTTCCTCGATCTCTCCGCTTTCAGCTTCCCTTCCTCCTTCTCCGACGCCACGACTCGCCTCACTCAGAACCTCACTCATTTCCGCATCAACTACACCATCATCCTCTCCCTCCTCCTCGCTCTAACCTTGATCACACGCCCAATCGCCATCCTCGCTTTCGTCGCCGTCGGCTTAGCTTGGTTCTTCCTCTATTTCGCTCGCGAGGAGGCGCTCACCGTCTTCGGATTCACCGTTGACGACGGCGTCGTCGCGGTGCTTCTCATCGGTTTAACGATCGCAGCGCTAGTTACCACTGGAGTTTGGCT…	654	1	AT1G04260.1	MPI7 (CAMV MOVEMENT PROTEIN INTERACTING PROTEIN 7)	Encodes protein that interacts with CaMV movement protein. Colocalizes in the cytoplasm with the movement protein. Has similarity to mammalian proteins (such as the rat PRA1) which have been described as rab acceptors.	similar to prenylated rab acceptor (PRA1) family protein [Arabidopsis thaliana] (TAIR:AT1G08770.1); similar to hypothetical protein [Vitis vinifera] (GB:CAN60779.1); contains InterPro domain Prenylated rab acceptor PRA1 (InterPro:IPR004895)	85.16	182	23	1	20	553	1	182	3e-62	234
MMN1.Contig_1345	GATTGCAGAAAAAGATGAGCTCGTCCCCGTTAGCGTCATCTCTCTTTCCATCTTCTCTTTCGACCTTGTCGGCTCATAAGCATGGCCGGAGCTGGAACTTCTGCGTCAGGCGGAAGGAACAGTGTCTTCGTGTTCTAGCTGCCAAGCTTCCGGAGGGGGTGATAGTGCCAAAAGTACAGCCCAAGTCTCAACCAGCGTTTCTGGGATTCACACAAACAGCTGAGATATGGAACTCTAGAGCTTGCATGATTGGTCTCATTGGCACTTTCATCGTCGAGTTGATTCTGAACAAAGGAATACTTGAGTTGATCGGGGTAGAGATCGGTAAAGGCCTTGATCTTCCTCTGTAATCTATTTTTATGAAATGTTAAACTTTTAAAAGCTTTAATCACACATCAT…	483	1	AT5G02120.1	OHP (ONE HELIX PROTEIN)	Encodes a one helix protein homologous to cyanobacterial high-light inducible proteins. The protein is localized to the thylakoid membrane and its transcript is transiently induced by exposure to high light conditions.	similar to one helix protein [Ipomoea nil] (GB:AAP23938.1); contains domain SSF103511 (SSF103511)	86.81	91	12	0	75	347	20	110	3e-39	157
MMN1.Contig_1346	GATAATCCTGATGATCATCTTGCCCCTCCCACCGCGGTCGGTTCTTAACCGCATTCTGTCTCTCCTGTGAACATTCTCTGGGCTATGGTCACTGCACCACTCCGTGAACTATCACATTGCATCCTTACCTTATGGACATAAGTGAATCTCATAACTACACTACCCTGTCCTGCCCCTCCGCCCTCTACAAGCTTCATATCTCATCAGTTTGCCTCGTCCGCCCTAGGTTCTCCACTACATTCTTCTAACCGTATCCGAGAAGAGCCTGGTCTAGAATAGCGCTTGACTTCTCACAAGACAAACTCGCCCGGATGTCTACCTTGCGTTCTCAACAAATCCATATGGGATTCTGAGAGCATTCTTGCTTCTATCCAGCCGTGTCCGAGCGAGGTCTATATC…	745	1	AT5G45120.1	aspartyl protease family protein		similar to aspartyl protease family protein [Arabidopsis thaliana] (TAIR:AT4G16563.1); similar to unnamed protein product [Vitis vinifera] (GB:CAO70224.1); contains InterPro domain Peptidase aspartic, catalytic; (InterPro:IPR009007); contains InterPro dom	23.93	117	82	4	199	528	126	232	1.6	30
MMN1.Contig_1347	GATCATCATAAAATTCCTCTCCTCTTGCGATGGCCTTGGCTGATCGTGACTCATGAATCTTCTGCACTCCTCCTTGCACTCTGATTCCCTCTCTTCACGAGACCTTCCCTCACTTATTACCTAAAACCCATTGCAAACTTCTGTGTCGATGATCTCTTCATTACTCCATAACAAACTGTGTACGCTCGAAAACCATCAGATACCGCTCAAGACTCCTCCTTCACCGACTTCGACCCTCCATTAACCAATGTTGATTTTAAAAGTCCACTCGCTCCTTAAGAAAACTCCAAGACTTTGCCTTGCCTGGGCACTATGGGCATCTGGATGAACCTCGTTACAATCACCCCAGGAGTAAATAACCCGCCTCACTCCCACCCTGGCCTGACCAAGGTTTGTATC…	730	1	AT1G74820.1	cupin family protein		Identical to Germin-like protein subfamily T member 3 precursor [Arabidopsis Thaliana] (GB:Q9S772;GB:Q1PFD3); similar to germin-like protein, putative [Arabidopsis thaliana] (TAIR:AT1G18980.1); similar to germin-like protein [Ananas comosus] (GB:AAM28275.	46.36	151	78	1	97	540	26	176	3e-34	127
MMN1.Contig_1348	GTTCCTGCTTTTGGTGGCTTGTTTCCTCGCATATTGTAGTGAGACTATTTGGTTTTTTGCTGGAACAATCTGTTATGGTTCCTACTCTTGTCTCTAAGATCTATGGGCTCGTTTGACAATTCTCATCGAGTCCATTGTGATCGAAATCTAAAAAAATGTTGTCTGTCTGCTGATCCCTCTCCCACTTTTCTTGACGATGAACACTTCTCCGGCGACCTGCATGCTGTTTGATGCGTGAAGTGCTGTGTCCCATCAGATCCTGAGGATGATAAGGGCTTGGATACTCACTCTTTCCCAACAGCAGGGGACCACGAAAGTTTCGCAACTAATCATTGTGTGCTCTTGATCTCTTTGATCGTCCTGACATCAGAGGCCCCCGCTAGGTACATCTGCCTATCA…	762	1	AT1G09920.1	TRAF-type zinc finger-related		similar to PRLI-interacting factor K [Arabidopsis thaliana] (TAIR:AT4G15420.1); similar to unnamed protein product [Vitis vinifera] (GB:CAO61575.1); contains domain PTHR16295:SF10 (PTHR16295:SF10); contains domain PTHR16295 (PTHR16295)	40	40	24	0	124	243	27	66	0.017	36.6
MMN1.Contig_1349	GACAATATGCGGAATTCATCCATGAAAATGAAAAACAAGGGGGGGGTTGATATCGATGGGCCGCAAAACCGGATATGACTAAAAAAAAAAAAAAAGAAAAAAAAAAAAACATGTCTGCCTGCC	123	1	no significant hit
MMN1.Contig_135	GATCACCACCACTACTACTACACAGCCTCCTCCTCTCTTTCGATCAAAATGGCTAACCCAAGARTCTTCTTCGRCATGACCCTCGACGGCGCCCCCGCCGGCCGCATCGTGATGGAGCTTTACAAAGACACGACGCCGAACACCGCCGAGAACTTCCGCGCCCTCTGCACCGGCGAGAAAGGAGTCGGAAAGAAGGGAAAGCCGCTCCACTTCAAGGGATCGGCATTCCACCGCGKGATCCCCGGGTTCATGTGCCAGGGAGGCGATTTCACCGCCGGGAACGGGACCGGCGGGGAGTCGATCTACGGCGATAAGTTCAAGGACGAGAACTTTGTTAAGAAGCACACCGGGGCGGGGATCCTCTCCATGGCGAACTCTGGTCCCAACACCAACGGATCT…	752	2	AT4G34870.1	ROC5 (ROTAMASE CYP 5); peptidyl-prolyl cis-trans isomerase	belongs to cyclophilin family	Identical to Peptidyl-prolyl cis-trans isomerase CYP18-4 (CYP18-4) [Arabidopsis Thaliana] (GB:Q42406); similar to ROC3 (rotamase CyP 3), peptidyl-prolyl cis-trans isomerase [Arabidopsis thaliana] (TAIR:AT2G16600.1); similar to hypothetical protein [Vitis	81.87	171	31	0	49	561	1	171	2e-66	249
MMN1.Contig_1350	GAATATTCTCCTCATAATTATATCATCCTATGGTGATGACTAACGCATCACATCTACCCTCTCCTGCCCGTTTTACTATCGGCATCACTCTCATAATCACTGCTTCCCTCTCATACTACCTTCCTCCCGCACAAGAACTCTGTGTCTCTAACCACCTAGCTACCCCTTCTACAACTGATTGCTGATACATTACCTCAGTTCATCTCTTAAAAGTTCTTCTACTCCTGTTTATGCAGACAATGACACCGTACGGACTGCAAATCTTCCGATGATAATATCGCTCACCTCGCGTTTCATTCCAGGAATTATTTATATCGTAATCTACATCCTAAACCTTTCATGCTATCACTGAGGAGCTCACTATCGTCACATCACACTACTAGAGTCTCTACTGATCAG…	785	1	AT1G74820.1	cupin family protein		Identical to Germin-like protein subfamily T member 3 precursor [Arabidopsis Thaliana] (GB:Q9S772;GB:Q1PFD3); similar to germin-like protein, putative [Arabidopsis thaliana] (TAIR:AT1G18980.1); similar to germin-like protein [Ananas comosus] (GB:AAM28275.	32.89	76	51	0	461	688	149	224	2.9	29.3
MMN1.Contig_1351	CTCGAGGACTCGCCTTGTTGTTTGATCTCTTGTCCATTGAAACTTCCCTAGACTCTCTCTTGGAAGACTGGAACGCGGATATCAAAAGTTCTGGATTTTTTTCAATGCATTCGAATTATATTGAGTACGGACTCCTCGGTGTGTCTACCTTCGATTGCTTCTCGCTGCCTACCTCCTACTCAACTCTTCTTGAGCGTTCCTTGTTGATGCGATTGCATGAAGATGGCTCATCTTGGTCGTGTATGCTTCGTTGGATACAATGGTACCTGACGACGCTCTTGATGTCCCTCAGCTTTTTAACGACCTGTGGCCACCACTCTGTTCTCAATCGATCTCGATGATGTTCTGACGTACTAACTGGATTTGTAGAAATCAGACCTACAGACTGATAGGATTAAT…	687	1	AT1G21880.2	LYM1 (LYSM DOMAIN GPI-ANCHORED PROTEIN 1 PRECURSOR)		Identical to LysM domain-containing GPI-anchored protein 1 precursor [Arabidopsis Thaliana] (GB:Q93ZH0;GB:Q9SFE8); similar to peptidoglycan-binding LysM domain-containing protein [Arabidopsis thaliana] (TAIR:AT1G77630.1); similar to unnamed protein produc	32.08	53	34	2	67	219	50	101	0.28	32.3
MMN1.Contig_1352	GACATTGTATAGCCTCATCCTGGCTCACGATGCCCACTGGTCGACTGTGCGAAATCTATGTCAGACGGATAGAAATTGGAGGATACTGGGTGGTATCGGAGTACATGGCGTAAGAACGTGCCTTTGGGAGGTCAACAACAGTTGCTCACAGCTGCTAACTCCTCTCTTGCTGAAAAACGCATAGAGGCATGCTCCCTATGAAGGATTTGCATCTGAATATCGTGTTGGCTATACAATTTGTTACCGAAGAGATCATTCAGAGACTGGACCGAGAGGATGATAAGCCACACTGGGACTGCGACTCGGCCCACACGCATACTGCAGGAAGATTCGGGGGATTCGCCGCACTGGTCGAAAACCTGACAGATGCATGCCGTCTTGGAAATAGAAGGCCTGCGG…	770	1	AT3G11760.1			similar to unknown protein [Arabidopsis thaliana] (TAIR:AT5G04860.1); similar to unnamed protein product [Vitis vinifera] (GB:CAO39924.1)	31.43	35	24	0	235	339	332	366	4.7	28.5
MMN1.Contig_1353	GAATCTAAATCATGAAAAATCCTCAACAAAACAAAGAATGACAAATTTAAAGAAACAACGTTACGTGGACATCCCCTCTGTCATTTCCGGCTTTCTCCTGTTTGAGAAGCATAGAAAATGAATATCTGGAGTACTCTCTTAGGACTATTGGAAGAAAATAAACAACAATAAGACATTACCTGAACCAATCAAAAACCTTCTAGACCACCCATTTATGACAGGATAAGAGAGGATTTGCAAGGATTTTAAAACCAAATATATCGCCATCATCTACCACAATCTTAACGTCCTATGAATTAAATCACACATATATATATATCTGGCTCTGTGCTGGTGGATGTGATAGGTTTATATATGCATGTATATGTGAGTATTAATTGAGCACAGAACACCTGTTTG…	757	1	AT1G49310.1	unknown protein			45.57	79	43	0	50	286	3	81	2e-13	72.8
MMN1.Contig_1354	GAATAATTGGAAAGAATTCCCCGGCTCTGTGAATAACGGACTTTTCTCCAAGCGACGGGCCTTGGGCAGATACCATCAGATATCCATGGCTCTCCGATCAGCAATGAGTCTTCCCACTCCGCGGCTGGTCTGCGGTCTTTGCAGTTTCAATATCTATACTACTGACATAACTGTACAACAAACGGAATGAAAATCATACGATACTCCTTATGTAGCTCGCACAGAGAGAACGGATTATGTACTTCCACATGAACATAGAGCAAGATGCGTTCGCAAGTGTTAAATTCTTATTAGCCAGAGAACGTTTGATATAATGTGGATTGTATGATGGGATAACCAGATCTGATCACATCTTACCTTCGAGCTATTATGTACCACTTCTTACTTAATTTTGTATGT…	744	1	AT5G01040.1	LAC8 (laccase 8); copper ion binding / oxidoreductase	putative laccase, a member of laccase family of genes (17 members in Arabidopsis).	Identical to Laccase-8 precursor (LAC8) [Arabidopsis Thaliana] (GB:Q9LFD2;GB:Q67YL1;GB:Q8GYV9); similar to laccase family protein / diphenol oxidase family protein [Arabidopsis thaliana] (TAIR:AT5G01050.1); similar to LAC7 (laccase 7), copper ion binding	32.35	34	23	0	20	121	259	292	2.6	29.3
MMN1.Contig_1355	AACCACTCTTATCATCCCAGAGGGAGCATTACGTCCGGAGATAACAAGCTGATGACTCCTCGGATCTCTTATCGACCGAGTCCATTGGCCCCACGATGTCCACTCATCACATCCCGGGGTACAAAAGCGTCCCAAAGGTCCGGTCGTTCCCCGATTCGAGTGAAAAATGAGCAGGGTTTACAACGTCGAGACTACCGTTCTACTCGTATCTACCCTTGGCGTAAGAGCTACAACTTTCACGACCCCAACCTTCTCTTAGAGGATTTGGTTGGTTCGATCTATGGTGATATTCAAAAGTTATACGATAGCAGCGACCTGCGACCTCACTTGGTTATGGAAAAGCTGCTGCTTCTTATCTAATCTCTTCTGTATAAAATTCTCATATCAGCTCTTATTAAC…	742	1	AT3G49590.1			similar to unknown protein [Arabidopsis thaliana] (TAIR:AT3G18770.1); similar to unnamed protein product [Vitis vinifera] (GB:CAO48537.1)	26.23	61	45	1	4	186	320	379	5.9	28.1
MMN1.Contig_1356	GAAAAAGAGGAAAAGCTTACAGAAGGATACCTAGACACCCTTAGACGAGGAATGCCGTACTATGCTACTAACTGCTTAAGAAATGAGATAATAAAAATAAATCCGTACATACCCGAATATGTTAACCTTTTGAACTGCTGCTGAATCCATGGACAGGCTAAACACAACCATGTGGAACTGAACCGTCTTACTATCCATATAAAAAATAAAAAAATAAAAAAAAAAAATGATGTCTTCTCCCTTTTACCTCGATAAGATTTCTAGCCCATCCTGTTGTTTCCCGGACTCTGTAGGAAACAGCACGATGGTATTGATTGTTTCCTAGAAAATCCTGGCAATGACTTCTACTTGGATGAATACCAAGAATCAATGCACAGCCGATCCCAAGCTTATTGACCA…	533	1	AT2G19940.2	semialdehyde dehydrogenase family protein		Identical to Probable N-acetyl-gamma-glutamyl-phosphate reductase, chloroplast precursor [Arabidopsis Thaliana] (GB:Q93Z70;GB:O82187); similar to unnamed protein product [Vitis vinifera] (GB:CAO47751.1); contains InterPro domain NAD(P)-binding; (InterPro	33.33	27	18	0	360	440	104	130	4.4	27.7
MMN1.Contig_1357	GGACTCTAACCAGTCACTAAATTAAACTCCATAAAATCAACAAAAAAGAAAAAACGTTCTAAAGGCTGCCTCAACCTTGGCTCTCTCCTCCCCTGCCTTCGACGGAAAGATCGTGAAGCTTTCTCCTTCATCATCAGAAGTCCTTGGAAGCGGTCGTGTGACAATGACTAAGACCGACTCCAAGCCAAAAGGCCCATCAGGCAGACCATGTTACGGCTCCGAAACAGACAAGTTCCTACGTCCATTCTCTGCTGAACCACTGAGATACCTTACCTGAGAGTTTCCCGGACACTACGGATGGGACATCGCCCGTCTCTCACCCCACCCCGAGACCTTCATTCAGGAACCGTGAGCTTTATCTTACCACTGCAAGTGGACCATGCTCAGAGCCCTATGCTG…	692	1	AT1G29930.1	CAB1 (CHLOROPHYLL A/B BINDING PROTEIN 1); chlorophyll binding	Subunit of light-harvesting complex II (LHCII),which absorbs light and transfers energy to the photosynthetic reaction center.	Identical to Chlorophyll a-b binding protein 2, chloroplast precursor (CAB2B) [Arabidopsis Thaliana] (GB:P04778;GB:P83754); similar to CAB2 (Chlorophyll a/b-binding protein 2), chlorophyll binding [Arabidopsis thaliana] (TAIR:AT1G29920.1); similar to CAB	64.88	205	72	0	65	679	2	206	2e-60	229
MMN1.Contig_1358	GAACCGAACTCTATATCATTACTTATGTATAGTATACCATGATGTTGTAGTCATATTATTTATGAGCAATATTAGAAGTTGCAAGTATAAAAGAACATATAAGTTTTTCTATTCATATCAGAGTTTGCTGTCTAATTAGACCGCTTAGAAACTGGAAAAGTTCCACCAATAGACTGATCTTACTAAGATTCTTATTAGATAGCAAACTTACATCCCCGGGTGCGGGCACACTCGTTCACTTTATCTGTTACAATTAATGAGCAAAACTAATACTATTTCTTGCATATAATTGATAGCAACAAATCTAAGAGAGATCATGCTAATCAGAAGTTATCCAGACCATCCAAACAGTTTTATGAGACGCTGGACTACCTAATGAGGATTCCAAAACTAATGTTC…	758	1	AT5G55480.1	glycerophosphoryl diester phosphodiesterase family protein		Identical to Probable glycerophosphoryl diester phosphodiesterase 1 precursor (GPDL1) [Arabidopsis Thaliana] (GB:Q9FJ62;GB:Q5XEZ7); similar to glycerophosphoryl diester phosphodiesterase family protein [Arabidopsis thaliana] (TAIR:AT1G66970.1); similar t	47.06	34	18	1	656	757	608	637	6.1	28.1
MMN1.Contig_1359	GATTGATCAAAAAAAAGAAAAAAGAAAGAAAAGAAAAGATGCAGATCTTCATGAAAACCTTGATCGGCAAAACCATAACCGTAGAGGTTGAAAGCAGAGACACCAGTCGACGATGTCAAATCCAAAATCCAAGAAAAAGAGGGGATACCACCTGATCAACAGAGGCTCATCTTTGCTGGGAAACAACTTGAGGATGGCCGAACGCTAGCTGACTACAACATTCATAAAGAGTCCACTCTTCACTTGGTTCTGAGGATTAAGGGTGGGACCATGATCAAGGACAAAACTCTCAATGGTAAAGAAATCAAAATTGATATCGAACCTACCGATACTATTGACCGGAGCACGGAACGTGTTGAGGAGAAAGAATGCATCCCTCCTGTTCGACAAAGGCTCATC…	654	1	AT1G31340.1	RUB1 (RELATED TO UBIQUITIN 1)	Encodes a ubiquitin-related protein that is conjugated to target proteins by neddylation. It has been shown to be conjugated to the cullin AtCUL1. The RUB-conjugation pathway has been implicated in in auxin response.	Identical to NEDD8-like protein RUB1 precursor (RUB1) [Arabidopsis Thaliana] (GB:Q9SHE7;GB:Q0WQU3); similar to UBQ7 (RELATED TO UBIQUITIN 2) [Arabidopsis thaliana] (TAIR:AT2G35635.1); similar to Os09g0420800 [Oryza sativa (japonica cultivar-group)] (GB:N	57.14	35	15	0	39	143	1	35	0.003	38.9
MMN1.Contig_136	GGAGAGTAAGAGACACGGTGCGGTTGGGCTGTTGTCGTCAGGTGTGGAAGCGCGGGTTGTGGATCCGGATACGGGTCGGATCATGGGTGTGAACCAAACGGGCGAGCTTTGGCTCAAAGGTCCCGCCATCACAAAAGGTTATTATCGAAACGAAGAAGCTACAAAAGAAACTATTAATTCAGAAAGATGGCTAAAAACGGGAGATCTCTGCTGCATCGACGATGAAGGATTTGTTTTTATATTGGATCGATTGAAAGAGCTAATCAAATACAAAGCTTACCAGGTCCCTCCAGCTGAACTAGAAGGTTTGCTGCTCACTCATCCTGAAATCGTTGATGCCGCAGTGATCCCATTTCCAGACAGAGAAGTAGGGCAGCTTCCGATGGYGTACATTGTRAG…	768	2	AT1G20510.1	OPCL1 (OPC-8:0 COA LIGASE1); 4-coumarate-CoA ligase		Identical to 4-coumarate--CoA ligase-like 5 (4CLL5) [Arabidopsis Thaliana] (GB:Q84P21;GB:Q9C5H2;GB:Q9LMV8); similar to 4-coumarate--CoA ligase family protein / 4-coumaroyl-CoA synthase family protein [Arabidopsis thaliana] (TAIR:AT1G20480.1); similar to	76.6	188	44	0	2	565	357	544	1e-82	302
MMN1.Contig_1360	TGGGGGTTGAAGAAGTTGTGGAGAATGAGTCTGGAAGTGAGGGGGATGACACTGTGGGGTCTGATTCGCGTACTAGTGGTGATGGGAAGGGGAACCATGTGGCTCGAGGAGAGGATGTTGCGGTGAAAGATGTTAATGTGGCTGAAGCGAAAGAGATTCAGCATAAACTTGAAGGTAAGGAGAAAGGTGAGAAGGAAGTTTCAGGCGAAAAATGCGAGGGAGCCAATGGGGCTGAGAAGTTTGAAGATGCATCTATCTGAGAATGATTCTGTTGGAGAACGAGGAACAACCATATGATTATGATTACTTGCACGGGAAGTTATGATGATACGTGAATGAGAGTGGTGATGCATACCGTTTTCGCTTCTGTTAGTGATGTATCTCTGCATCTCTATGATG…	542	1	AT5G19900.1	PRLI-interacting factor, putative		similar to unnamed protein product [Vitis vinifera] (GB:CAO67188.1)	58.54	41	13	2	45	155	374	413	0.0009	40
MMN1.Contig_1361	GATATATCTTCTCTCCAGAACCATCTCTATTGCTCTCGTATCATATTTTCAAGAAAATGATCTAGGACTCTCTCTTCTCACTTTTCCTTTGCTCGTGATGGATGATCTAAACGATAACTACATCTCGCCTTGTCTCTCACTGCCACAGTTTGAATACTGGAATCAAAAACTATGAACCATTCCAGACTATTCAGTGGATTTCACTTGTATCACATAGATGAGGATACGGAATCAAACACATCCTTCTCAAGTCAGTCTTGGCAACTGATAAGACCTCATTAACTCTTTTCTTAACCGACCTACTTCAGATGATAATACTAAGCCTAGATTCGCGACTGTCCCCAGCCACTACAACAGAACCAACACTGATTTCTCTCACCACAAGCCACTTTCTCCATC…	725	1	AT5G64850.1			similar to unknown protein [Arabidopsis thaliana] (TAIR:AT5G09960.1); similar to 80C09_15 [Brassica rapa subsp. pekinensis] (GB:AAZ41826.1)	47.79	113	59	2	98	436	1	111	4e-19	91.7
MMN1.Contig_1362	GACAGTGGAGCCTGAGGAAACCGTCGCCGCCGTTGTGACTGAGTCTGCTCCAGCTCCGGTAACAGAAACTGAAGCTCCCGTGGAAGAAACAGAGAAACAAACCGAAGAAGCAGAGGAAACCAAGAAGGAGGAAGACGCTCCCGTCGAAGTAACCACTAAAGACCTCCCAGTCGAAGAACCAGAGGAAACCAAACC	195	1	AT1G62480.1	vacuolar calcium-binding protein-related		contains domain PTHR22683 (PTHR22683)	82.35	17	3	0	137	187	46	62	0.33	30
MMN1.Contig_1363	GAGAAGACTTGGGTGTAAAAATGTCGACGGTGGTAGATCGGAGTGTATCGACGCTGAACCCAAACGCGCCGGCGTTCGATCCGGTGGGATTCCGTGAGGTAGAGGATTTCTCTCCCAAGTGGTGGGAGCTGGTGACAACATCCAAGTGGTTCCGTGACTTCTGGCTCAGTGCCAACTCGGAGGAGTATGAGTTCGGCGATGTGGAGGACGAGTTCGAGGAGCTAATCATGACGTCATCCGGTGAGAATGAGATGGGTGGATCTTCAGTGAGAGAATCAGATGTTGGGAGGTACTTGAAGGCGCTTCTGAGCATGGAGGAGTCTACGAAAGGGAAGCTTTACGGATCTAATGTGTCTTGTTCTGCCAAGTATAACCGGAAGAGGACGAACCCGAACTTCT…	657	1	AT4G14270.1		Protein containing PAM2 motif which mediates interaction with the PABC domain of polyadenyl binding proteins.	similar to ERD15 (EARLY RESPONSIVE TO DEHYDRATION 15) [Arabidopsis thaliana] (TAIR:AT2G41430.2); similar to ERD15 (EARLY RESPONSIVE TO DEHYDRATION 15) [Arabidopsis thaliana] (TAIR:AT2G41430.4); similar to ERD15 (EARLY RESPONSIVE TO DEHYDRATION 15) [Arabid	64.14	145	45	4	21	434	1	143	7e-47	183
MMN1.Contig_1364	ACGCGCGGGGACAAAAAAAAACATATGAACTTTCGAAAGAATGAATATCACAATATAATACTTCATTCAAGCCGACCTACCCAAAGGAACCGAACAAAAAAAAGGAATCATATGAGTGATACATCACTTGTCTAATATATTAAAAGAGATAAGTAAATAAACAATCTACGTCCACTCCATCGCCTTCTATACGCAACGTTCTCTTAATAATTGACCCTTGTGTTTTCTGGACACGCGGGAATACGATTCTCGTTAATTTATTCAAAAAGTAAACACACTAACTGAATGCAATAGGTGATCATTACAATTTATAATTTCGAGAATCTGATCCGTAATTGATTGCGCCCTGGAAGATGACGTACGCCGAGAACTATTTTTTTATGCAACCCCAGAGGGCAA…	765	1	AT3G10000.1	EDA31 (embryo sac development arrest 31); transcription factor		similar to PTL (PETAL LOSS), transcription factor [Arabidopsis thaliana] (TAIR:AT5G03680.1); similar to unnamed protein product [Vitis vinifera] (GB:CAO15958.1); similar to hypothetical protein [Vitis vinifera] (GB:CAN71904.1); contains InterPro domain SA	34.38	32	21	0	22	117	198	229	4.7	28.5
MMN1.Contig_1365	GATACGTCTAGTGCTACTGCACCTGCTCTTCACGCCGATAGATAATTCAATTAGTGAACTGATTCTCTCTCTTTACTGCACTACCAATTCTATGAACACCATCCTGATGACCTACTCTTCCCCCATCCCTATGCCATTGATATCAAGGATGAAAGAACCCCCAAAACCTCTCCTTCTCCTCCTCCGACGAAACCTTTTGTAACCCTTACCTTAGGGAAGTTTGCTGCCTTCACTAGCAAATCAGCTGCTGCTTATTCTTGACGAGATTAGGATATTGATACCTGAAAGCTTATTATTGATTAAAATGTCCCTTCTTATTCTCTGTCTTTGCTATGAATCTCGTAGGGACTGATGATCCTGTTGTTGTCTACTGTGTTGTTAATATTAGCAAAGTCGACA…	755	1	AT2G18230.1	ATPPA2 (ARABIDOPSIS THALIANA PYROPHOSPHORYLASE 2); inorganic diphosphatase/ pyrophosphatase	Encodes a protein that might have inorganic pyrophosphatase activity.	Identical to Soluble inorganic pyrophosphatase 2 (PPA2) [Arabidopsis Thaliana] (GB:P21216;GB:Q8L988;GB:Q9ZPV6); similar to ATPPA4 (ARABIDOPSIS THALIANA PYROPHOSPHORYLASE 4), inorganic diphosphatase/ pyrophosphatase [Arabidopsis thaliana] (TAIR:AT3G53620.	40.94	127	75	1	342	722	47	172	3e-13	72.4
MMN1.Contig_1366	GATCCTCCTTATTAAAATCTCTAATTTACTGTTTCTCCTACACTTTCTCCTTCACACTTCATTTAGGGTCCCTACTCTAAATCTCTTTATGTTTCTCTCTTTCTGTCTCTGTGTTCTAGATCCAGTATGATAATTAAACCCTTTCTTGGTTGATCTCTGTGAAATCCCGCCTTTCTTCTCTCCTTATATTCAGACTTTTCTGATTTTCTGGATAATGCCGGCCTATCTGATAAATTTCTAATACCAATCTTAAGTGCTTTTGGGATTTATGTAACTGATCATTAATGTATGTCCATTGCAAATTATCGCTATCCATGCTCCTTGTCGCTGTTACTTTTGAATTAACTAGTATTGATGAAATTTTGTTCGATTTCGTCAGCTCCATGAGAGACTATCTTC…	771	1	AT4G14420.1	lesion inducing protein-related		similar to lesion inducing protein-related [Arabidopsis thaliana] (TAIR:AT1G04340.1); similar to ORF; able to induce HR-like lesions [Nicotiana tabacum] (GB:AAC49975.1); contains InterPro domain HR-like lesion-inducer (InterPro:IPR008637); contains InterP	47.69	65	34	0	318	512	64	128	7e-07	51.2
MMN1.Contig_1367	GGTCTCTCTTCTCATTATCCTTCACTTCATCAGCAACGAGAGAAGAAGAAGGTTAGATTAGATTAGATTCTCTCGAAATCATGACGACCTCCTGCTACTTCGAAAACACTCCGTCAAACTACTACGACGTCCAGCGTCATGGCGGCCTGAACGCCATCTACTACCCGAACTTCATGACGGACTCCGTCAAGTCCTTCTTGGTTCACATGTACAGACACCTCAAGAAGAATAATGTCTACTAGATCCACCAGATGTGCCAGACCTCGTTCCAGACCTTGTCTGAGCGTCTCTTCAAGGACACCCCTTGGCTTTCCATCGAAACGATCGCTCCTTATGTCGACCACCATCACGTCTTCTGTCTTTTGTGACCGTGAGATGAGGTTCCGTCTCTTGTACGCG…	771	1	AT5G25757.1			similar to unknown protein [Arabidopsis thaliana] (TAIR:AT5G25754.1); similar to predicted protein [Physcomitrella patens subsp. patens] (GB:EDQ51676.1); similar to unknown protein [Oryza sativa (japonica cultivar-group)] (GB:AAT77307.1); similar to predi	64.29	84	30	1	114	365	4	86	3e-77	114
MMN1.Contig_1368	GATATACATTAAAGATCCCCACACATCCACATAACGCTGATCTTTGTGAGAACGTGGCTGCTTCATGTGATGCTTTCATCTTGCGACATTGAAACGCGCGGGATTCACGGTGGACAACATGTCTTTCACAGGATTGCCATCTTTCTCACTACCTTCTCCTTCTTCCTTCACAATCCTCGCTAGTGGCTCCAATAATATCTGAGCACACGACCCCTTTGGACTTAACAACATCTTGGACTTGATGGACTGCGTCGACGCTTCAGGCAGAAAGGGCAAGGGATACTGTGTGTACCAATTTGTCTACTGGTATGGAGCGAACGTTGATGGATACAGTCCTATCTACAACCAGGACGAGTGCGTCACCGAGTGATGACGTGTACAAGGAAGGATTCACCGGTT…	777	1	AT1G79040.1	PSBR (photosystem II subunit R)	Encodes for the 10 kDa PsbR subunit of photosystem II (PSII). This subunit appears to be involved in the stable assembly of PSII, particularly that of the oxygen-evolving complex subunit PsbP. Mutants defective in this gene have reduced amounts of subunit	Identical to Photosystem II 10 kDa polypeptide, chloroplast precursor (PSBR) [Arabidopsis Thaliana] (GB:P27202); similar to Photosystem II 10 kDa polypeptide, chloroplast precursor (GB:P49108); contains InterPro domain Photosystem II protein PsbR; (InterP	91.67	12	1	0	403	438	115	126	7e-19	21.9
MMN1.Contig_1369	CACAATGACAACTTGAGTGCCAAGATTGCGCCTCTCTCTTAAAGAAACTCCGGAGCTCCAAATCTTCTTCTTAAGCCGTGTAAGGTGTCGCAGGGTTTAAAGAATGCGGGATCATTGATGTCTGCTTCGTTGGGCCTAATCTGTTGTTTTGGAAAATAAAGAAGCACTAGTTTGATTACCCTTCATTTGTTTCTCTATATAATCTTTTTTTTCGCTCAATGTCCAGGCTTTTATCTGCTTAACCATAATGGTAGATTAGTCGTTTTATTATTCCTTTGTTACATTTTTTTTTCAAATTTTCTTGTGCATTTGTAATCAGATTTTATTTTGGTGGGGGAGTTTACAATTCATGAATCTATTAATCAGGG	368	1	AT1G23880.1	NHL repeat-containing protein		similar to NHL repeat-containing protein [Arabidopsis thaliana] (TAIR:AT1G70280.2); similar to hypothetical protein [Vitis vinifera] (GB:CAN69794.1); contains InterPro domain NHL repeat (InterPro:IPR001258); contains InterPro domain Six-bladed beta-propel	26.92	52	38	0	187	342	14	65	3.2	26.9
MMN1.Contig_137	TGGATGAAGTCTCCTGTCGCCGGGAGAATATACCGGCATACAGCGTCGCCAAAGATGACATGGGAGTCAGGGCAGAGACATGTAGCCAAGGATACTATCAATGAGAAGGAGATCAGCTTCAGAGACGCACTTAGGGCTGCACCACCGCCTACGGCAGCCGGTGTTGCTTGTTCCATGGAGGAAGGAGCCGCCGGAAAAGAAACAGCTCCGGTTGCTCCTATTGGCAGGCAAGAAATGCCAAGTGCCGCTTTGATGGTGCGGCTCATACTAACTGTCGTRGGGCGCAAGCTTTCTCGAAACCCCAACACCTATTCTAGCATAATAGGTCTTGTCTGGTCACTTATATCCTTCAGATGGAATATAGCGTTGCCAGATATTGTWGCGTTTTCGATAAAGATA…	873	2	AT1G77110.1	PIN6 (PIN-FORMED 6); auxin:hydrogen symporter/ transporter	Rate-limiting factor in saturable efflux of auxins. PINs are directly involved of in catalyzing cellular auxin efflux.	Identical to Probable auxin efflux carrier component 6 (PIN6) [Arabidopsis Thaliana] (GB:Q9SQH6;GB:O49294); similar to PIN1 (PIN-FORMED 1), transporter [Arabidopsis thaliana] (TAIR:AT1G73590.1); similar to unnamed protein product [Vitis vinifera] (GB:CAO	80.29	208	38	2	1	615	323	529	7e-101	326
MMN1.Contig_1370	GGATGGAGATAGAGCTCGGAGAGTTCGAGACAGGACGAGAAGGTGGTGACAAGGAGGTTGTTATGAGTCTAACCGAAGTTAAAGGTTATCAGTTGAAAGGTGGGATTGTAATTGATGGGATTGAAGTCAGGCCTAAACCCTAAAAACGAGTGCCAAATATTTTGGTTAAGTTGATAAATAAATGGGTTTATTTGTGAAATAAACAAAAGAAAAATTATACGATGAGAAAATTATAATGTGTTGGCCAGTGATACAAACTGATTGAATCATTCATTATTATTGAATTTAGAGTCTTATGATTTAATCATAC	310	1	AT1G09155.1	ATPP2-B15 (Phloem protein 2-B15); carbohydrate binding		Identical to F-box protein PP2-B15 (PP2B15) [Arabidopsis Thaliana] (GB:O80494;GB:Q8LBR0); similar to ATPP2-B13 (Phloem protein 2-B13), carbohydrate binding [Arabidopsis thaliana] (TAIR:AT1G56240.1); similar to unnamed protein product [Vitis vinifera] (GB	86	50	5	1	3	146	234	283	2e-16	80.5
MMN1.Contig_1371	GGACTCATATCTCTCTCAATGGCTGCCCAGTGGCATGACTCTCGTATCCGCGGCTGCTACTAAGGCCACCACTACGATCAGCAATACCCCGCCTCCCATTCCCGGCGGGTCTAAACTCTCGTTTCCTGATGAAAGGACTAACACTCCAAATGATCCCGCACCTGACCTCCCGTCTACTTACCCGCCGTTCTCGAGTACCTCGCCGCTGAAGTATTGCAATTGGTTGGAAACACGGCCAGGGACAACAACAACACAAGGATTGTGCCTAGGCATATCCAGCTGGCAGCGAGGAACGATGACGAGATGAGTAACTAGCTGGAACATGTAGCGATTGCTAATGGACGTGTGATGACCAATATTCACAATCTTCTTTTGCCCTGGAGTGATGGAGGTTCGTCT…	743	1	AT5G54640.1	HTA1/RAT5 (RESISTANT TO AGROBACTERIUM TRANSFORMATION 5); DNA binding	Isolated from T-DNA insertion line, the rat5 mutant is deficient in T-DNA integration. Encodes histone2A protein.	Identical to Histone H2A.6 (RAT5) [Arabidopsis Thaliana] (GB:Q9LD28); similar to HTA2 (HISTONE H2A), DNA binding [Arabidopsis thaliana] (TAIR:AT4G27230.1); similar to unnamed protein product [Vitis vinifera] (GB:CAO39058.1); contains InterPro domain Hist	77.14	70	16	0	169	378	50	119	2e-23	106
MMN1.Contig_1372	GACAGACAAAACGATTTGTATCCTCCCAATATTCGATTCCTTCCTTCATTCTTTCACTCATGGCTACCATACCTGTAGACCCCACGCCGTACAAGATCTCTTTGACCGGATTGACGGCTATCGCTAAACTTCCTTGTTCAATGGAATACACACGTTTTCTCGTCCATCTGTAGACTCATACATGAACTTTTTGCTTGTAAACACTGAATAATACTTCGGTAGACACCTTGACACGCAACCTCGAAGAGATCTTGAACATATGGATCACCATTTTGTATATCCGAAGTGAGCTAAAATATATGGATCTCGTACATTCTAAACCAAACTCGACTGTGCCCGTGGAGTTAATATTACCCAGTCATGATGTATTCTATGAGTATCTTAGATTCGTTGACCTCG…	557	1	AT4G30220.1	RUXF (SMALL NUCLEAR RIBONUCLEOPROTEIN F)		Identical to Probable small nuclear ribonucleoprotein F [Arabidopsis Thaliana] (GB:Q9SUM2); similar to unknown protein [Arabidopsis thaliana] (TAIR:AT2G14285.1); similar to hypothetical protein OsJ_005430 [Oryza sativa (japonica cultivar-group)] (GB:EAZ2	41.33	75	44	1	60	284	1	74	8e-05	43.5
MMN1.Contig_1373	GGAAGATAAATCCATTTTATATCTCCCAGTTTGTAATTCATGATCTTTCATTCATTCTACTTCATCTAAATCAACTTCATCTAATGGACTTAACTAGCTATATATTTCTCATCACTATGGAATTGAATATCGACATATTCCAAAAAAAAAATAACATATAATAAAATATGTTCCATCTCGGACATACCCAAATTTTCAACATCTTTCGATATGTACGATGTCTCGATCATATGATGTATGATTGAAAAGTT	251	1	no significant hit
MMN1.Contig_1374	GGATCTGAATTTTGGTTCGTCTTCTCTTCGAGAGGAAGCTTTGATTTGATCTAAATCTATGGATTGTTATTGTTGATTGATTAAGGAGAGTTGAAGTTTTTTGTGATCGGAAGATTATGGATTGTGGAAATGTGACGTTTGATGATATCGTCGATGCTCTTCGAGAATTTGACTGGTCGTCGACGTCACATCCGCTCTCAAAGTTCTCCTCACGGTTCACCGTTCCTAAATCTTTGTGTCAATGGGACAGCCGCCATCAAGTGCAATCTCTACTACTACCTAACGAACTACTTCATCATGATCATCTTTATACTTGGATTGGGATTTCTTACGAGGCCTCTCGTGATTCTCTCTGCCTTTTTGACTGCACTGTCTGTGGCATTTCTTAGTGACAGCTTT…	746	1	AT5G02040.2	prenylated rab acceptor (PRA1) family protein		similar to prenylated rab acceptor (PRA1) family protein [Arabidopsis thaliana] (TAIR:AT5G05987.1); similar to hypothetical protein [Vitis vinifera] (GB:CAN72272.1); contains InterPro domain Prenylated rab acceptor PRA1 (InterPro:IPR004895)	69.57	46	14	0	117	254	1	46	1e-65	68.6
MMN1.Contig_1375	GACACCCTCCTCCCTCACTTTCCGCTCCGTTTCTCTTTGCATTTTCCCCGAGAAACTTCACATTCTCGTCCCCCTTCTCTTCATATAAATCCATTATCTCTCTCTCTCTCTCTCTCTCTCTGCATGGTCGGGGAATAGAATCTGTTGTTTCTCAAATTCGTCAAAAAAATCCTTTTTTTAAAAATTAAAGTCTCCACCTTTCTTCTGAAACATTCACCGTGGAGATTCTCGGATCATGCCTGGCTGCTCGTGGTGGGTTTCACGGCGGCGACAGATACATCTTCTGCCTTCTCCTGAGGGGGTAGCCGAGGCTCCGGCCTCTGTGGTTTTCAAACCCCTTACCTTCACAAAATCTGGTAATCAAAAAAATCAAACCTTTCGAATATGATTCGTTAATAA…	412	1	AT5G36880.2	acetyl-CoA synthetase, putative / acetate-CoA ligase, putative		similar to acyl-activating enzyme 17 (AAE17) [Arabidopsis thaliana] (TAIR:AT5G23050.1); similar to unnamed protein product [Vitis vinifera] (GB:CAO49143.1); similar to acetyl-CoA synthetase [Solanum tuberosum] (GB:CAA67130.1); similar to H0502B11.5 [Oryza	26.42	53	34	1	221	364	499	551	5.6	26.6
MMN1.Contig_1376	GACCAAGACAGCAAAAAAAAAGATGTCAACAGTTTCACCCTTCTCGCAACTGGTTCAGGTGGTTCCAGACAACCACAACAACACTGACGACTCCTCTGCGGAGGTCAACTACGAAGATCTTGTCCAGGAAGCAATGGAGAGCTTGTCCCTCGAGGAAGGCACTGTTGAACCGCAGATTGGGGATGTGGGAGACGGAGTCATTGATGGGACGACGTCCGAAGGTGGATACCTGGTGACGATGAAATTCGGTTCTCGAGTGCTGAAAGGAGTGCTTTACCATCATGCTAAAAGGCCCCAACAAGCCATGGGAACACCACCTTCAGGCATGCCACCAGCATCACAGCGCCGAGCTAAGAAGAAAGCCAGAGAGACTACTCAAGTTGATTCTAAGAAACCCAA…	684	1	AT3G13350.1	high mobility group (HMG1/2) family protein / ARID/BRIGHT DNA-binding domain-containing protein		similar to high mobility group (HMG1/2) family protein / ARID/BRIGHT DNA-binding domain-containing protein [Arabidopsis thaliana] (TAIR:AT1G55650.1); similar to unnamed protein product [Vitis vinifera] (GB:CAO66841.1); contains InterPro domain High mobili	43.6	172	61	6	92	499	137	305	5e-18	87.8
MMN1.Contig_1377	GAAAAAGAGAGCAACAGAACCCACAAAGCCTCAGACAAAGCGACCACGTGGTCCTCAACCCCGAGTCACTGACAACAACAACAAGACAGGATATGGTAGAGTCATCCCTGAGAGGTATCCACAGTATTTGTATGACAACAGACAGTTCCTTAGCGGTCCAATCATGGCAGCTCAGGCTCCTCCTCCTCAGACTTACACTTTCAGTCCAGCTCCTGCTCACGGTAACTTCTACGGGAACTGCTATCAGTACCAGGCTCCTCCTTACTTTCACTAGTGATAATGGTGAATGTGACTGTGACTCTTTCTCTCCTATGGTGTTAACTAGTGGCAGCTCCTTAACCCCCCCTCTCCTACTAGTCGTTTTCCTTTTGATGTTTTTGTTGTGTATGGATGATTTTA…	492	1	AT5G48385.1			similar to hydroxyproline-rich glycoprotein family protein [Arabidopsis thaliana] (TAIR:AT3G22440.1); similar to unknown [Populus trichocarpa] (GB:ABK94872.1); contains InterPro domain Frigida-like (InterPro:IPR012474)	81.19	101	8	3	2	271	458	558	2e-42	167
MMN1.Contig_1378	AAAGACCCAAATACTGATTGAAACGGATATGGAATATAAAGTTTTAAACTTCTCTCTCATTCAATATTATTTAAGAGTCAAAATGCGAAAGCTCTTCTTTGTGGTTAAATGCCAAAAACTCAAGTCAGCTCATACGTCTTTATGTTGTGTTGATCGTTACAGGCCTCTTGAATCTTCTAGATTACCTATCGTTATTGTCTTTTTTAGTTGGTATTTGTATGGAATGGGAATACGGATTTCTTCTTGTTTTCTTTATTATTGATAGGAATTTTCTTGTTAAGACCCTACTTATTAATTGAAACCTCAGATTCATACGAAAACCACGATAATTCAATGAAACCTTCAAAGTCCAAAGTTCACTGAGTGAGAACCATTGGATCATCACTTATTC	391	1	AT3G27670.1	RST1 (RESURRECTION1); binding	A novel protein, did not show high similarity to any protein of known function; reveals a novel genetic connection between lipid synthesis and embryo development. Expressed in all tissues examined including leaves, flowers, roots, stems, and siliques, but	similar to unnamed protein product [Vitis vinifera] (GB:CAO14717.1); similar to hypothetical protein OsI_000548 [Oryza sativa (indica cultivar-group)] (GB:EAY72701.1); similar to hypothetical protein OsJ_000525 [Oryza sativa (japonica cultivar-group)] (GB	34.04	47	31	1	44	184	170	212	8.4	25.8
MMN1.Contig_1379	GAACCCTATTTATTGTGGTCGCGACCATAGAGAGAGAGAGAGAGAGGACAACGACATTACATTTTCCTTTCTCTTCCTTCCCCCTTTATTAATTCTTCTCCTAAGTTTCGAAGAATCTAAGCTGAACACGAAAGGTCTTTGAGATGGCATCGAAACGGATTTTGAAGGAACTGAAGGATCTGCAGAAGGATCCTCCCACTTCATGCAGCACAAGACCTGTCGCGAAAGACATGTTCCATTGGCAAGCCACGATAATGGGTCCATCCGACAGCCCTTACTCTGGTGGCGTTTTCCTTGATACCATTCATTTCCCTCCTGATTATACTTTTAAACCTCCTAAGGTGGCTTTTAAGACTAACGTGTTCCACCCGAACATTAACATCAATGGGAGCATCTGCC…	729	1	AT4G27960.2	UBC9 (UBIQUITIN CONJUGATING ENZYME 9); ubiquitin-protein ligase	ubiquitin conjugating enzyme	Identical to SUMO-conjugating enzyme UBC9 (UBC9) [Arabidopsis Thaliana] (GB:P35132;GB:Q42014;GB:Q8RXQ0;GB:Q9FPH9); similar to UBC10 (UBIQUITIN-CONJUGATING ENZYME 10), ubiquitin-protein ligase [Arabidopsis thaliana] (TAIR:AT5G53300.2); similar to UBC10 (U	89.62	106	11	0	129	446	26	131	1e-71	202
MMN1.Contig_138	GGACAGGATCAGCGAAAAACTAAGAAGACATGGGAAGCCAATCATACGAAGACGCCCTCGAAGCTCTCAAGAAGCTTGTCATTGAGAAGGATGACCTGAAGACGGTGGCTGCGGCCAAGGTGGAKCAGATCACGGCTGAGCTTAAGAAAATCTCGTCATCGGACGGCAAACCATTCGATCCTGTGGAACGAATTAAGGAAGGCTTCGTCACCTTCAAGAAGGAGAAATACGATACGAACCCTGCTTTGTACGGTGAGCTCGCCAAAGGTCAGAGCCCAAAGTACATGGTGTTTGCTTGTTCGGACTCACGTGTGTGCCCATCGCACGTGCTAAATTTCCATCCTGGAGATGCCTTCGTGGTTCGTAACATTGCTAATATGGTTCCTCCTTATGATCAGG…	801	4	AT5G14740.2	CA2 (BETA CARBONIC ANHYDRASE 2); carbonate dehydratase/ zinc ion binding	Encodes a beta carbonic anhydrase likely to be localized in the cytoplasm. Expression of its mRNA is seen in etiolated seedlings and points to a possible nonphotosynthetic role for this isoform.	Identical to Carbonic anhydrase 2 (CA2) [Arabidopsis Thaliana] (GB:P42737;GB:Q42116;GB:Q9FDZ0;GB:Q9LER2); similar to CA1 (CARBONIC ANHYDRASE 1), carbonate dehydratase/ zinc ion binding [Arabidopsis thaliana] (TAIR:AT3G01500.2); similar to CA1 (CARBONIC A	90.23	256	25	0	30	797	1	256	2e-133	471
MMN1.Contig_1380	GGCTTCTGCGTTTAAAGCATAACCCTTTCGAGACATGGCGGAAGAGCCACAGAAGACGTCTTCTTCTTCTTCTTCCGTACAGCAACCTTCTTCCGACAAGAAACCCGAAGATGCTGAGATCAAGCCTCAGGTTCCGGATCATGGTGATTCCCCAAAGTATCCGGTTTTATATCCGGGTCTTGCTCCCGGGTCGAATCCTGGACAGAACGATGAACAAATGAACCGTGGAGCTGGCATTTATGCGGTTCCTGTTCATCAGTTTGGAGGATATGTCGCTGGTCTTCCTTCGAACGATCTCATCCCTCTTACTTACAATGTTCCCACGACTAGACCAAGCAATGAGACTGAGGCTGGGGGAGAGAACCAAGCGCAAGCGGGGCAGGGTCAGCAGCAACAACC…	700	1	AT4G29960.1			similar to unnamed protein product [Vitis vinifera] (GB:CAO15556.1)	74.53	161	31	2	107	559	23	183	2e-54	208
MMN1.Contig_1381	AACCAAAATAAAGAAGAAGGCCGGAAGGGTGAAGAAGGGAAGAAAAGTAAGAAGAACAAGAAAAAAGACCCAAAGAAAAAGAAAAAAACAAAGGATGAAGAAGAGAAAAACATAGCAGGGTCAAAAGATGAAGATGGTGACC	142	1	no significant hit
MMN1.Contig_1382	GATCAAAAACATCATCATCATATCTCCATAATGATGGCTAAAGATCCACAAAAATCTTCTTCGATCCTCCTTACACTCTGCTTCGCTCTCTTCACAACTCCGTTCCTGTAATACTACCTTAGACCCTTACGAGACTTCTGAGTCGCTGATCTCTAAGATTCCCCAAACAATACTGTCAACCCAAGCGAGGCGTTTCTCACCTCTGACGATTTCTTCTACTCCAGCTTATGCACTCCACTAAACACTATAAACCCTAAAAGTATTTTCACTGATCGAAAACATCTCATGACGTTACCAAGAATTATTGAGATGGTAATCTACATGAACAAATCTCCATCGCTCCTTCGAATATCTAATCTCTCTCACACGTATCCAGGAGTGATCAACGTAAGGATCTTG…	747	1	AT1G74820.1	cupin family protein		Identical to Germin-like protein subfamily T member 3 precursor [Arabidopsis Thaliana] (GB:Q9S772;GB:Q1PFD3); similar to germin-like protein, putative [Arabidopsis thaliana] (TAIR:AT1G18980.1); similar to germin-like protein [Ananas comosus] (GB:AAM28275.	44.3	158	85	1	64	528	16	173	4e-35	120
MMN1.Contig_1383	GAAAACAAAAATATTCTCTCGGATTTATAATTCCAGAGTATATTCAAAGGGAAATAAATTAAGAGAAAGAGAGAGTTGAGTAGGAAAATTTAGAGAGAGAGAAAGTAGATCCCGTTTTAGGGCCCGGCGTACGGACGGCGCGTGAGCGTCCGTGCCGTCGCCGGAGGCCGTCTTCTTCCATCAAGCTCCCTTATTTTCCTTTCTCTTCGCCGTCCTTCAACGATCGCCTTGTCTAAGTTCTGGATCTGGTTCATCTTTCTACGGTGGTTTAGTGTCTGGAGGGAAGACGCGGTCGGGTTAGGTGCTGGCGTGAGTAACTTGGTTCGTCGATCCGTGGTGTTGATTCCGGGACATGGAAGCTACCCTAGTTCCGTCGTCGCCGGCCTTCTCCGGGAGGTG…	757	1	AT3G09920.2	PIP5K9 (PHOSPHATIDYL INOSITOL MONOPHOSPHATE 5 KINASE); 1-phosphatidylinositol-4-phosphate 5-kinase		Identical to Phosphatidylinositol-4-phosphate 5-kinase 9 (PIP5K9) [Arabidopsis Thaliana] (GB:Q8L850;GB:Q9SF93); similar to phosphatidylinositol-4-phosphate 5-kinase family protein [Arabidopsis thaliana] (TAIR:AT1G10900.1); similar to phosphatidylinositol	45.71	35	19	1	386	490	127	157	0.32	32.3
MMN1.Contig_1384	GACAGCTAATAGAACCAAATGCATAGAGAGAGATTGAACTTCTCAAAATCCGATTTAGATCCGTCCGATGACGATCACCAAAGCGCCGCAGCTCTCTTTCACCGCCGCCTCCTCGACGCTATGCTCACTCGAAGGCTCACTCCTCACCGTCGCCGTCCTCACCTTCCTCTCCCTCTTCTACCTCTCTCTCAATTCCCTCCGCACTCCCCCGCCCTCTACCATCGAGGTAGAGGCCACTATTCACGTTCCTCATCCTCACACCAAGGATGAATCTTACTCCGACGTCTACCACTCTCCAGACTCGTTCCGGCTCAATTACGCTGAGATAGATAGGAAGTCGAAATCTACTTATACCACGACGGATATCCCAACACATTCTTCCAAACATCGAGCAGAGTC…	756	1	AT4G38040.1	exostosin family protein		similar to exostosin family protein [Arabidopsis thaliana] (TAIR:AT5G11610.1); similar to unnamed protein product [Vitis vinifera] (GB:CAO23058.1); contains InterPro domain Exostosin-like; (InterPro:IPR004263)	60.58	137	54	0	340	750	105	241	4e-62	171
MMN1.Contig_1385	AAGACTCTACCTAACCATCACATCCTCCATTACCCTATCTTCATTCTCGTCATTGTTGTTGACCGACGTCCACGATAAATACCTTTCGTCATGAGAAATCTTACTGGAAAGTTCCAGAATAATTATGTAACCTACTATTGGTGTGTAGGTACATCCTCTAGATTTCTTCATAAACTGTGGCAAGATCCGTTTCTACTGCTGGGACACTGCTGGTCACGAAAACTTCGGTGGCCTTAGAGATGGTTACTACATCCTATGGTCAATGTGAGGAGATCATGTTCGACGGTGACAGACGCAGATCATATACTATAACGTCCCCGCTTGGCATCTTGACCTGCTGCCGTGTGTGTAAGAACATCCCCATCGTTCTCTGCAGGAACGAGGTCGATGTGAAGAACA…	756	1	AT5G20020.1	RAN2 (Ras-related GTP-binding nuclear protein 2); GTP binding	A member of RAN GTPase gene family. Encodes a small soluble GTP-binding protein. Likely to be involved in nuclear translocation of proteins. May also be involved in cell cycle progression.	Identical to GTP-binding nuclear protein Ran-2 (RAN2) [Arabidopsis Thaliana] (GB:P41917;GB:Q94K33); similar to RAN-1 (RAS RELATED NUCLEAR PROTEIN), GTP binding [Arabidopsis thaliana] (TAIR:AT5G20010.1); similar to putative RAN2 small Ras GTP-binding nucle	47.5	40	21	0	7	126	3	42	2e-24	36.6
MMN1.Contig_1386	TCGCGGGTAATGTCTTCGAGGCTATCAAAAGGAACATACAACGGAGGGTTGCTGTCGACGGAAGCTGGAACCTTGGCTAGGGTTGTGGCGGATGCAACCATAACCTTGGGAGGATTCTTGGGAAGAAACCATCTCTTGAATGCAACTCTTCTACCATCACTTGTCATCTGCATTGGCTCCATTGTTGATACTTGTTGTACTTATAACTCTCTCTATTGATATGTTTTTAAGAGATTTTGCTACCAAATTTTACAAAATAGAATAAAAAGGAACAGTGTGTGTATGATCCTCTCTTTGTTTGATTTTATTTGTGATCATCTTACCATGTGATGGTTGAGAGTCTCTACTAGAGACTAAACAGAGTTGATATTTTTGTAGTGTTTATGTTTGTGACTAAAT…	464	1	AT1G63010.4	SPX (SYG1/Pho81/XPR1) domain-containing protein		Identical to Uncharacterized membrane protein At1g63010 [Arabidopsis Thaliana] (GB:Q2V4F9;GB:Q94C80;GB:Q9CAP0;GB:Q9LQ03); similar to SPX (SYG1/Pho81/XPR1) domain-containing protein [Arabidopsis thaliana] (TAIR:AT4G11810.1); similar to SPX (SYG1/Pho81/XPR1	95.83	72	3	0	1	216	628	699	2e-33	138
MMN1.Contig_1387	GATCTCGCTTCTCTCCCATCTCCTCTCACCTTTCCTCACAAACAGTGGCTACGAAGAATATCGTGTTGAAGAGCTCCGATGGCTAGTCTTTCGAGGACGACAAGGCCGTGGCTCTCGAGTCTCATACCATAGCCCACATGGTCTAAGACGACTGCCTCAACCACTGACTCCCACTTCCCTGCGTCATCGAGCTAGATCCTCGCCCAGGTGATTGAATACTGCGAGACTCACGTCGATGCCGCTGCTTCCAAGAGCGAGGCCGTCTATGGCGGTGGCTCCTCCGACTATGACCTCAATGCTTGGGATGCTGAGTTTATGAAGATCGATCAAGCTACCCTCTTTGAGCTCATCCTGGCTGCTAATTATCTGAACATCAAGAACCTTCTCTACCTGACATGC…	708	1	AT1G75950.1	SKP1 (ARABIDOPSIS SKP1 HOMOLOGUE); ubiquitin-protein ligase	SKP1 is core component of the SCF family of E3 ubiquitin ligases and serves to tether the rest of the complex to an F-box protein, which provides specificity in binding to ubiquitin ligase substrate proteins. Predominately expressed from leptotene to pa	Identical to SKP1-like protein 1A (SKP1A) [Arabidopsis Thaliana] (GB:Q39255;GB:P92992); similar to ASK2 (ARABIDOPSIS SKP1-LIKE 2), ubiquitin-protein ligase [Arabidopsis thaliana] (TAIR:AT5G42190.1); similar to kinetochore protein [Brassica juncea] (GB:BA	65.96	47	16	0	45	185	1	47	3e-56	60.8
MMN1.Contig_1388	ATATAAAAATTTAAATATTATAACATAGTGTGTGCTCTTCCTCCCGCCCACAACCCAAAACAGACCAGAAGCGAGAGCAGAGTCAAGAAGAGAAGAGGAACGCCGCCCACTTACACTTTCGCTATACCTTAAACTATAATTATATACTTTCTCAGGGCGACCGGGACACGATAGTCCTTGGGCACGGCGAATTTTTAGCCCGTTCGGCGGCGCGGGGAGATAGACATCCTATATAACCACTACTCTCAACTCGACGTAAGATTGAGATATGACGTGACTGTTTGAGATCTTATATATCTATCTATTTTCGTCGTATCCAATTGATGATACTTTGCGTAAGAAGAAATCCCTATCTATCTTTTGCTATTGGTAAGCCTGAACTATGTATCATCATTACAA…	1100	1	AT1G67770.1	TEL2 (TERMINAL EAR1-LIKE 2); RNA binding	Similar to terminal ear1 in Zea mays. A member of mei2-like gene family; phylogenetic analysis revealed that TEL2 belongs to the third clade of mei2-like proteins (TEL clade), with conserved two N-terminal RNA recognition motifs (RRM), in addition to the	similar to TEL1 (TERMINAL EAR1-LIKE 1), RNA binding [Arabidopsis thaliana] (TAIR:AT3G26120.1); similar to unnamed protein product [Vitis vinifera] (GB:CAO42474.1); contains InterPro domain RNA recognition motif 2 (InterPro:IPR007201); contains InterPro do	38.24	34	21	0	862	963	251	284	7.9	28.5
MMN1.Contig_1389	GAACAAAAAACACACAGTTTACTCACAAGTCACAACACAAATTAGAAGAGACAGACAGAGAGATGGCGACGTCAGGAACATATGTAACAGAGGTTCCGTTGAAAGGATCAGCAGAGAAACACTACAAAAGGTGGAAGAGTGAGAACCACCGCTTTCCAGACGCCATAGGCCATCACATCCAAGGTGTCACAGTCCTCGAAGGCGATTGGGACTCTCATGGATCCATCAAGATTTGGAACTACACATGCGATGGGAAACCGGAAGTGTTTAAGGAGAGGAGAGAGATAGACGATGAGAATAATGCGGTCACGGTCAGAGGTCTTGAAGGCCACGTGATGGAGACTCTTAAGCTGTATGACACCACCATTCAGTTCATTCAAAAATCGCCTGATGATATCG…	655	1	AT2G01520.1	MLP328 (MLP-LIKE PROTEIN 328)		Identical to MLP-like protein 328 (MLP328) [Arabidopsis Thaliana] (GB:Q9ZVF3); similar to MLP329 (MLP-LIKE PROTEIN 329) [Arabidopsis thaliana] (TAIR:AT2G01530.1); similar to unknown [Populus trichocarpa x Populus deltoides] (GB:ABK96619.1); contains Inter	83.44	151	25	0	63	515	1	151	5e-75	277
MMN1.Contig_139	GATGAAAACTATAACAACCATAAAGAGAGATTTAATTTAATAGAAAAGAAAGAGATCAAAGATGGCAGGAATTATCAACAAGATCAGGTGATGCTCTCCATATCGTACGAGGCCACAAGGAAGAGGAGCACAAGAAGGAGGAACACAAGAAACACGCCCACAAGCACAAGAGTGGTGAGCACTAAGAAGGTATCGTTGATAAGATCAAAGACAATATCCACGGTGGACAAGGCCACAGCAGCGGATACCACAAACATGACTGTGAGAAGAAAAAGAACAAGGACAAGAACGAAAACAAACACCATGATGATGGTCACCACAACACCAGCAGAGACTGTTACAGCTATTAAGGRAAKAAAGTGAGGAAGACTATCMATGCAGCTGWTGTCTGTTCCTGTC…	587	2	AT1G54410.1	dehydrin family protein		similar to water stress induced protein [Brassica oleracea] (GB:AAS77419.1); contains InterPro domain Dehydrin; (InterPro:IPR000167)	81.25	16	3	0	192	239	45	60	0.47	31.2
MMN1.Contig_1390	AAAAAAATTATAATAAAGGAGGGCTTGTTCTTCCCCCCCCCCCCAACCAAACCCAACGCACACGCGGAGATCTAGTAGGAGAGGAGGAAGGAGCGCCCGCCTAATTCTCTTTATAGATATATCTATTATATCAAGAGTATATCTATTCCGAGCGGTGCGCGCGACATACTGCCTCGGCGAATTAAGCGCTTATCTACTTGCGCGGCGGGAGGACAATACAACATATCAGATTAATAATCGGCGTAAGAAGATATATACTCTATATACAACATACCCACCGGACGAGCCATCATACTGATGACTACGGTAGAATTCTGCCGCTTGTACAGCTCTAAGGTCACCTACCGTAAGTCTCATCTTCCTGCTCCGAGTAGTGGACGTCAACCTCGTCTAGGTAGC…	1120	1	AT5G37270.1	zinc finger (C3HC4-type RING finger) family protein		similar to zinc finger (C3HC4-type RING finger) family protein [Arabidopsis thaliana] (TAIR:AT5G37230.1); similar to hypothetical protein OsI_036181 [Oryza sativa (indica cultivar-group)] (GB:EAY82222.1); similar to Os12g0140600 [Oryza sativa (japonica cu	42.31	26	15	0	298	375	82	107	3.6	29.6
MMN1.Contig_1391	GGATGAAGCGCGTCATAGAAAAGCTACGTTTGGGTTTTTAAAGCATTTGATTCCCTTCGGAGCTGATCTGTGTTGGATTTGAGGCGAAGGAGAAGAAGACTGCTCCAATGGCTGGTCCTGAACTAGAAGCTATTCGACAGAGGAGAATGCAAGAGCTCATGGCTCAGCATGGCGCTCAGGGGAAGCAGGGGAGTCAGCAGAATCCAGATCAAGAGAGAGCACAGGAAGATGCTAAAAGGGAAGCTGATGAACGTAGACAAATGATGCTTAGTCAAATCTTGTCTTCCCAAGCCCGTGAGAGAATTGCTCGAATTGCCCTGGTGAAACCTGAGAAAGCTAGAGGTGTAGAGGATGTTATTTTGAGGGCTGCTCAAATGGGACAGATTGTTGAGAAGGTTT…	758	1	AT1G29850.2	double-stranded DNA-binding family protein		similar to unknown [Populus trichocarpa] (GB:ABK95623.1); contains InterPro domain DNA-binding TFAR19-related protein; (InterPro:IPR002836)	91.8	122	10	0	108	473	1	122	8e-56	213
MMN1.Contig_1392	GAAAGAGCGTATGATTGACGCTTCCGACAGCTCTCTGTATCCCTTTGAGAACTCTGCTTAGCCCGATATCCTCGTGGTTTCCCATTGCTGATTGGCGAAGAGGTGACATGGGGAACTATATACCACTTCTGAGACTGATACCGGCTCTGAATCTGATCCTTCCTCTGACTACCATCCTGATGAAAAGACCTGCTCTCCGGAGGTGCGGACGCTGGCACGACCGCCTGGAGGATTCACACGCTAGGGGAATATTGCTAGAACACGAAATAACTATCATTTAAACACGAAGACGACATTATTTGATTAAGCCTAAGAAAATCCTAGGGGTTATATGGCTGACGGATGACGTGATGCTAAAACTAACAAGGAAAAAGTAGAGTAAGCGGACTCGGAAACAAC…	760	1	AT1G53590.1	NTMC2T6.1/NTMC2TYPE6.1		Identical to C2 domain-containing protein At1g53590 (NTMC2T6.1) [Arabidopsis Thaliana] (GB:Q93XX4;GB:Q9C8L5;GB:Q9LPH4); similar to NTMC2T6.2/NTMC2TYPE6.2 [Arabidopsis thaliana] (TAIR:AT3G14590.2); similar to NTMC2T6.2/NTMC2TYPE6.2 [Arabidopsis thaliana]	37.84	74	45	3	179	397	650	718	0.022	36.2
MMN1.Contig_1393	TGGTTGGAGCATTCATGGAAGGAGGTAGTGGTGACGAGAACAAAGCCTTGGCGAAAGTGGCCAAAGCTAGACCTGCTGCAGAGAGCCTCGAGGATCTTACCAAACAAGGCATCTCCTTTGCTGCTAAGATCTGAGGAGAAGAAAGATGGGAGAGTTTAAACTTTTTTTCTATTCTATTACAATAAAAGATTATGTTAAGCAATGTGCTTGCACGTACATATGCTGAAATAAGTTGGGTGTTTGAATGAAACCTGATTGGATACTTGTAAACGCTATTCATCAAACTAGATAATGCGATTTTAT	303	1	no significant hit
MMN1.Contig_1394	GGAAGACGAACTGAGACGACTCAAGCAAGAAGAAGAAAAAATTCAACGCATAAAGGAACAATGGAAGAGCAACACACATGGATCTAAGCGTAAGGATAGAGCTGAAGATGATGATGGGGAAGGTAGGCCGAGCGAGCGGAAAAGAAAGAAAGGTGGGAAGAGAAGAAAGAAGGACAAAAGCTCAAGGGCTCGACATTATGAGGATGATGATGAAGAAGCACCTACTATGGATGATCATAATGAAGTGGAAGATGAGGACGCCAACACCAATTATAATAGGGAAGAGGAGAATCAAGAAGCTGAGGAGCCTGTGGATGATGATGATGCTCATGATCTTCTTGCTGCTGCTGGGCTTGAAGATCCTGATGCTGATGATGATGATGGGGTACCTGCTTCAGT…	518	1	AT2G06210.1	ELF8 (EARLY FLOWERING 8); binding	Encodes a yeast CTR9 homolog that is involved in the control of flowering time by elevating FLC expression to a level that creates the vernalization-responsive, winter-annual habit. Yeast CTR9 is a component of a five-member PAF1 complex that associates	similar to SEC (SECRET AGENT), transferase, transferring glycosyl groups [Arabidopsis thaliana] (TAIR:AT3G04240.1); similar to putative TPR-containing nuclear phosphoprotein [Oryza sativa (japonica cultivar-group)] (GB:BAC16228.1); similar to unnamed prot	73.41	173	44	3	2	514	906	1073	6e-21	97.1
MMN1.Contig_1395	GAGGGATTTGGCCGAAGAGAGAGCAATGGCGAAGAAGAAAGAGCTCTTATCCAAAGCCCCGTGGAGAGGCGACGACGATGACTCGGACAAGTTCAGCGGCGCAAAGCTCAAGGTCACCAAGGAATCTGACGGTATGTCCAAGATGCACGTCCCTAGCCGTGGAGCCGATAAGGTTAAGGGTAGTCTCTCCGATGACGAGGATTCCCTCGAGATCGATCCTCAGCTTCGCTACAGCTTCAATCGAAACTATCAGTTCCTGCAAAGAGTGTTCTCTATAGACACTGTGGTGAAGCCACTTCCTCCTGCCATGGCTTACAATGTCTCTCGCAACTTGGGCTTCTTCTTCCGCATTTTCACTCAGTTCTTTGATCCTGAAGGCATTGCAAATGCACAGAAGTC…	556	1	AT1G33810.1			similar to unknown [Populus trichocarpa] (GB:ABK94119.1)	85.61	139	19	2	26	439	1	138	1e-57	218
MMN1.Contig_1396	GACTAGGCGTGCCACTTGTCATAACTTCTTTGGCTGAATATCCCGGGGTCTATATCATCCCAAGTGACAATTCGTTGCTTGAGACACTAGGGTTCTTAATGGTAGGCTTGCTTTGGGCACTTGTGATAATGCCAAAGAAGAAGATGAGGCTTGATCGGCTTGTCGGTGGAGGGTTACTAGCTATTTACCTATGTTTCTTGTTCTTGAGATTGGCTAGGGTTTTCGGAGTGCTTGATATCGACCGGTGAAGTTTAAAGTCTTTGTGAATTTTGTAATAGTTGATTGTTAAAGAAGAAATTTGCAAATAGATTAAAGTTGTGGGTCTTATTAGTCCATAAATTTTATTTATTGTGAATACTATTGAGAGGGATGGCTAACTTTGTTTGTTGGTGAGTG	396	1	AT5G17860.1	CAX7 (CALCIUM EXCHANGER 7); calcium:sodium antiporter/ cation:cation antiporter		similar to cation exchanger, putative (CAX8) [Arabidopsis thaliana] (TAIR:AT5G17850.1); similar to unnamed protein product [Vitis vinifera] (GB:CAO67491.1); contains InterPro domain Sodium/calcium exchanger membrane region; (InterPro:IPR004837)	95.06	81	4	0	3	245	490	570	4e-38	153
MMN1.Contig_1397	GAGTCGGGGGAACGCAGAACAACTTTTGTGGAGGAGAGAAAGCGATATAACACACACACAGAGATATACATCTTCAATAGTTAAGAGTTTTCTATATACAGAAGAAGTGTGTGTGATAGAGAGACATCAGATACAAAAGCAAAAGAAATGCAACAGCACCTGATGCAGATGCAGCCCATGATGGCTGGTTACTACCCCAGCAATGGTCACCTCTGATCATATTCAGCAGTACTTGGACGAGAACAAATCGTTGATTCTGAAGATAGTTGAATCTCAAAACTCGGGAAAGCTCAGCGAGTGTGCCGAGAACCAGGCAAGGCTTCAACGCAACTTAATGTACTTAGCTGCAATTGCAGATTCTCAGCCTCAACCTCCAAGCATGCATAGCCAGTATGGAAC…	784	1	AT5G28640.1	AN3 (ANGUSITFOLIA3)	Encodes a protein with similarity to mammalian transcriptional coactivator that is involved in cell proliferation during leaf and flower development. Loss of function mutations have narrow, pointed leaves and narrow floral organs. AN3 interacts with membe	similar to GIF3 (GRF1-INTERACTING FACTOR 3) [Arabidopsis thaliana] (TAIR:AT4G00850.1); similar to unknown [Populus trichocarpa] (GB:ABK94681.1); contains InterPro domain SSXT (InterPro:IPR007726)	75.38	195	41	4	197	760	17	210	7e-34	140
MMN1.Contig_1398	GCTATTGAAGTTCCGCCACGGGATCCTAATGGTCCATTCAGGATGCCCATTATTGATAAATTCAAAGACATGGGAACTGTTGTTATGGGAAAAGTAGAATCGGGCAGCATTCGGGAGGGTGATTCCTTGATTGTTATGCCAAACAAGGAACACGTGAAAGTGGTTGCTATATATTGCGATGAAGACAAAGTTAAGCGTGCTGGACCTGGTGAGAATTTGAGAGTCCGTATAACTGGCATTGAAGACGAGGATATCCTTGCGGGTTTTGTTTTATCTAGCACGGTGAAGCCTGTACCTGCCGTTACTGAGTTCGTTGCCCAATTACAAATCCTTGAGCTGCTTGACAATGCGATCTTTACAGCTGGTTACAAGGCTATTCTCCACATTCATGCGGTTGTT…	772	1	AT1G18070.2	EF-1-alpha-related GTP-binding protein, putative		similar to elongation factor 1-alpha / EF-1-alpha [Arabidopsis thaliana] (TAIR:AT5G60390.1); similar to elongation factor 1-alpha / EF-1-alpha [Arabidopsis thaliana] (TAIR:AT1G07940.2); similar to elongation factor 1-alpha / EF-1-alpha [Arabidopsis thalia	93.17	205	14	0	1	615	319	523	3e-107	384
MMN1.Contig_1399	GATTTTCCTTGCCTCATCTCTCGTCTCTGCACGATCAGATCTCAAAATCGGATCGGATCGAATAAAATCCACGAGTTTGATCAAATATGACCCTTGGCTCCGGAGGAACGAGTGTTGTTGTACCGAGGAATTTCCGGCTGCTGGAGGAGCTTGAACGTGGGGAGAAAGGTATTGGAGATGGAACTGCGAGCTATGGAATGGATGATGGTGATGACATTTACATGCGCTCTTGGACTGGCACTATCATCGCTCCTCACAACACTGTTCATGAAGGTAGGATCTATCAGTTGAAGCTCTTTTGTGACAAAGATTACCCTGAGAAACCTCCCACTGTCCGGTTCCATTCACGTATCAACATGACTTGTGTCAACCATGAAACAGGAGTGGTGGATCCCAAGA…	699	1	AT3G52560.1	MMZ4/UEV1D/UEV1D-4 (MMS ZWEI HOMOLOGE 4, UBIQUITIN E2 VARIANT 1D-4); protein binding / ubiquitin-protein ligase	MMZ4/UEV1D encodes a protein that may play a role in DNA damage responses and error-free post-replicative DNA repair by participating in lysine-63-based polyubiquitination reactions. UEV1D can form diubiquitin and triubiquitin chains in combination with U	similar to MMZ3/UEV1C (MMS ZWEI HOMOLOGE 3), protein binding / ubiquitin-protein ligase [Arabidopsis thaliana] (TAIR:AT2G36060.1); similar to unknown [Populus trichocarpa] (GB:ABK93802.1); contains InterPro domain Ubiquitin-conjugating enzyme, E2; (InterP	94.52	146	8	0	87	524	1	146	1e-76	282
MMN1.Contig_14	GACAGATCGAAAACACACAAGCGAATCTCAATTTAAAACTTTCCGAGAAAAGAAAAATGTCTGGGCGAGGAAAAGGAGGAAAGGGATTGGGAAAGGGAGGAGCCAAGAGGCACAGGAAGGTCCTCCGTGACAACATCCAGGGCATCACGAAGCCTGCGATTCGTCGTTTAGCTAGAAGAGGTGGCGTGAAGCGTATCAGCGGTTTGATCTACGAGGAGACTCGCGGTGTTCTCAAGATCTTTCTCGAGAATGTGATTCGTGATGCCGTTACTTACACTGAGCACGCTAGGAGGAAGACGGTGACGGCGATGGATGTTGTCTACGCGTTGAAGAGGCAGGGACGAACTTTATATGGATTCGGCGGTTGATGGGATGATTTTGTAAATCGCGTTTGTCTTT…	489	3	AT5G59970.1	histone H4		Identical to Histone H4 [Arabidopsis Thaliana] (GB:P59259;GB:P02308); similar to histone H4 [Arabidopsis thaliana] (TAIR:AT5G59690.1); similar to histone H4 [Arabidopsis thaliana] (TAIR:AT3G45930.1); similar to histone H4 [Arabidopsis thaliana] (TAIR:AT3G	100	82	0	0	120	365	22	103	9e-41	162
MMN1.Contig_140	AAGCAGTGGTATCAACGCAGAGTGCCCATTACGGCCGGGATATTTTCRTACTTACCATTCCTGATCAAGCCAAACTAGTTTGATCAACAGCTAGGTAAATCAATCAAGCCACTTAATCGAATAATGAGCCGAGGTGGGAGCTCTGGAGGCGGAAAAAGCTCGCTAGGTTATCTTTTTYGGCCAGACAATGAGACTCCAAAAAGTGTCCCACCAGCTGCCCCAAAGCCTACACCACCGTACGGTGGTAGATTTCACCGACGGTGACAACAAATCTGACCAAAAGCCTACGTTGTCTGAAAACAACAACTACCCCAGAGCTCAGGGCCAAAACTCTGGCAACTTCGTCACAGCTCGTCCAACGACGAAGGTTAAATCGGTTCCTGGTGGAGGTTCATCGCT…	623	2	AT4G23496.1	SP1L5 (SPIRAL1-LIKE5)	Belongs to a six-member gene family in Arabidopsis; all members share high sequence similarity in amino- and carboxy-terminal regions. Regulates cortical microtubule organization. Mutant plants exhibit altered patterns of root, leaf and petal growth as a	similar to SP1L2 [Arabidopsis thaliana] (TAIR:AT1G69230.2); similar to SP1L2 [Arabidopsis thaliana] (TAIR:AT1G69230.1); similar to unknown [Populus trichocarpa] (GB:ABK92866.1)	79.66	59	12	1	245	421	42	99	1e-20	96.7
MMN1.Contig_1400	CGGTCCGTTTAGTGTCATGGCCTTAAAGCGCAAACCTGCAATGCCATTCTGGTCACATGGCAGGAAGAACATTGCGTAAAGAGAAGATGTAGACACTGCACATTTGCTTCTTCATAGAGGGCTCCTGACTCATAGGAGCAGAGAGGTCTCTGAAGAGATTTGTCAGATGCTTTTAATGTTGTTGTTTATGCCATAACTAGATACATAATAATGCAGCTGCTGGGTTTCGTGTATATATAAAGAACCATAAGCTGCATTTAAGCTCTACGTTGGGTTTCGTTGATGCAATGTTATGGAAGTATCCCTCTTATATTCTATGAAATGAAGTTCCAAAA	335	1	AT1G47128.1	RD21 (RESPONSIVE TO DEHYDRATION 21); cysteine-type peptidase	cysteine proteinase precursor-like protein/ dehydration stress-responsive gene (RD21)	Identical to Cysteine proteinase RD21a precursor (RD21A) [Arabidopsis Thaliana] (GB:P43297); similar to cysteine proteinase, putative / thiol protease, putative [Arabidopsis thaliana] (TAIR:AT5G43060.1); similar to unknown [Populus trichocarpa] (GB:ABK95	87.5	24	3	0	5	76	439	462	2e-06	47.4
MMN1.Contig_1401	GATTCTCATCCACAGACCACAAGAAGACGACGAAGATGAAGCTGAAAGTGTATGCGGATCGTATGTCACAGCCATCTCGTGCTATAATCATATTTTGCAAGGTTAACGGAATTGAATTCGATGAGGTTTTGATTATCTTGGCCAAGCGTCAACAGTTGTCCCCTGAATTCAAAGAGATTAACCCATTGGGGAAGGTTCCAAGTATTGTTGACGGCAGATTTAAACTCTTCGAGAGTCACGCCATCTTGATTTATCTTGCCTCAGCATTCCCAAGTGTAGCTGATCATTGGTACCCAAATGATGTTTCCAAGAGAGCCAAGATTCACTCTGTCTTGGATTGGCATCACACCAATTTACGCCCTGGTGCAGCTGGATATGTAATGAATACTGTTCTAGCTC…	699	1	AT5G41210.1	ATGSTT1 (Arabidopsis thaliana Glutathione S-transferase (class theta) 1); glutathione transferase	Encodes glutathione transferase belonging to the theta class of GSTs. Naming convention according to Wagner et al. (2002).	similar to ATGSTT3 (Arabidopsis thaliana Glutathione S-transferase (class theta) 3), glutathione transferase [Arabidopsis thaliana] (TAIR:AT5G41220.1); similar to unnamed protein product [Vitis vinifera] (GB:CAO62808.1); contains InterPro domain Thioredox	85.45	220	32	0	36	695	2	221	6e-108	386
MMN1.Contig_1402	TATTATAGTCATAACACTCCAACTTAATACTAAGTGAGGGCGTGCTCTGTCGTCCTGTCGTCCCCGCGCCAGCCACACNACAGCACAACCGCACGCAGGACGGCAGGCCACNACGCTACGATGCTAGGGAAGGACGGAGGGGAGNAGGACACGTCTCGCGCCTCAGTCTAATCATATCACTCTTCAGTTAAGTCAAGTCACTCATCTAATATGACTGAACAGGATATGATNTCACTGCACGCTGCGGAAGCTCAGCTCACGCAGCGTATCATTGACTCGCCGCGCAGGAGATTATATGTGCTCTGACTCGATATGAGCTGCGGGNCNGAGAGNCAACACACTANTGCGATTAGAGTCGGCAGAGACATTCTAACCCACATNTGCACTAGGAGCAGTACA…	1441	1	no significant hit
MMN1.Contig_1403	TTGCCCTTTCCGCCGGGGGTAAGCATTTTCTCCATGTGTATGAACAACATTGGATTAACGCATCTATTTGAATCCCTCTTTGTGTTCTCTTTGGCTTCATCAGGATTTCGACTAACATAATAAAAAATAAAAAAAAAAAAATTTGTTTTCCCGTGGGAAAACTTTTCCATTTTCACCGTTCTCCTG	186	1	AT5G41680.2	protein kinase family protein		similar to leucine-rich repeat transmembrane protein kinase, putative [Arabidopsis thaliana] (TAIR:AT1G64210.1); similar to unnamed protein product [Vitis vinifera] (GB:CAO65842.1); contains InterPro domain Protein kinase, core; (InterPro:IPR000719); cont	45.83	24	13	0	37	108	197	220	6.3	25.8
MMN1.Contig_1404	GATCTCAATCTCGATTTGAGACGAAAAGGAAGAGAAGCTGAAGCTAAAGATGGGTCAAGGAGAAGAAGACAAAAGCAAAGGCTTCGCTGATGAAGCAGGCACCCATCATCAGTACGGTACGTTTCAAGGCGTTTCCAATTACCCTCCTCCGCGGCCTCAGAACTCTCCTCCGGTCACTGGGTTTCCTCAGCCTTCTGCTCCGCCTCGAGTCTACGATTCCGCCCCTCCTCATTACGCCCATGGTTATCAAACCGTTCCGGTACATGGTATTGCTGAAGGAAGACCTGTGCATGTGCGACAACGCCGCCTTCCTTGCTGTGGAATTGGTCTTGGATGGTTCCTGTTCATAGTTGGGTTTTTCCTTGGAGCAATCCCTTGGTACGTCGGAATGTTCATCAT…	659	1	AT1G17080.1			similar to unknown protein [Arabidopsis thaliana] (TAIR:AT1G53560.1); similar to unknown [Populus trichocarpa] (GB:ABK95219.1); contains domain PTHR10052 (PTHR10052); contains domain PTHR10052:SF2 (PTHR10052:SF2)	77.78	9	2	0	490	516	146	154	6e-55	21.9
MMN1.Contig_1405	AATAATTGAATCGTGCAGTTACTGTTACTACAACATATTATACACATGTACATTACTGATTATAATGATCCAAATAAAATAATAATACCAGTGCGGTTTGTATATTTGTTAGACTTTCCCGCCAGTGTAAACGCGGATTAATTAGAGTTACTGGGCGTTCATACAGGCCCAATTAAAAAAAAAAA	185	1	no significant hit
MMN1.Contig_1406	GAACTTTCAAAAAGGCATTTTGTCGGCTGATTCTGCTTTCTTTGAGGCTTGTCATCGTCGATCCCTAGAAGCTAACGAAGATGGTTCTTCAAAACGATATTGATCTGCTAAACCCACCAGCTGAGCTTGAGAAGAGGAAGCACAAGCTCAAGCGTCTTATTCAGTCCCCTAACTCGTTTTTCATGGATGTGAAGTGCCAAGGCTGCTTTAACATTACGACAGTGTTCAGCCACTCGCAGACGGTTGTGGTATGTGGAAACTGCCAGACTGTGTTGTGCCAACCCACAGGAGGAAAGGCTAGGCTCACTGAAGGTTGCTCTTTCAGGAAAAAGTGAACAAGATGGCTCTCCACTCCCTCTTAGCCAGCCACATCTTTTCTTTTAGTTTCTTCTTCCTTTC…	512	1	AT3G61110.1	ARS27A (ARABIDOPSIS RIBOSOMAL PROTEIN S27); structural constituent of ribosome	Arabidopsis ribosomal protein	Identical to 40S ribosomal protein S27-2 (RPS27B) [Arabidopsis Thaliana] (GB:Q9M2F1;GB:Q9ZNS3); similar to 40S ribosomal protein S27 (RPS27A) [Arabidopsis thaliana] (TAIR:AT2G45710.1); similar to hypothetical protein [Vitis vinifera] (GB:CAN78160.1); cont	95.24	84	4	0	81	332	1	84	3e-36	147
MMN1.Contig_1407	GGCGCAAGTGAAATACCACTACTTTTAACGTTATTTTACTTACTCCGTGAATCGGAGGCGGGGTAACAACCCCTTCTTTTAGACCCAAGACTCGCTTCGGCGGGTCGATCCGGGCGGAGGACATTGTCAGGTGGGAGTGTCACCGAGGAAAACTATGACATATTACGATCCAAACCGGAAGCCCTAGCTAGTGGAAGAAGAGTGGCTAAAACAATTCGAGCTGTGATAGAGCCGATGCTAGAACCTACATTTGGTCATAATGTGATGGACGAACTTTTTGAAAGGTATGCAAAAATAGTGGGAGAGTACTCATATGTGAGCTCACCTCGATACGCTATTGTTAATATTTCGCTCGTAAAGATGGGTTGATCACTTGTACTTTTTAATTAATGGAGTATT…	453	1	AT1G19640.1	JMT (JASMONIC ACID CARBOXYL METHYLTRANSFERASE); jasmonate O-methyltransferase	Encodes a S-adenosyl-L-methionine:jasmonic acid carboxyl methyltransferase that catalyzes the formation of methyljasmonate from jasmonic acid. Its expression is induced in response to wounding or methyljasmonate treatment.	Identical to Jasmonate O-methyltransferase (JMT) [Arabidopsis Thaliana] (GB:Q9AR07;GB:Q9FWR8); similar to BSMT1, S-adenosylmethionine-dependent methyltransferase [Arabidopsis thaliana] (TAIR:AT3G11480.1); similar to jasmonic acid carboxyl methyltransfera	80.52	77	14	1	139	366	313	389	1e-29	125
MMN1.Contig_1408	GATCCCCAAAATTAAAATACAAAGTTCGCAAATCAAATGTATTCCGGTAGTGCTGGATCGATCAGACCATAAAAACTCTGTTCGATTGCAACTCCAGTGTACTAAAAGCCGATAAAATACTAAGCTGAGGGAACAAACATAGAAGCAAG	149	1	no significant hit
MMN1.Contig_1409	CAATGAAGATAGCGAGGAAGCTAATAGAGAAGAGGTTGCGAACAATGAAGATGGTGCAGTTGAAGAAACCGAGGAAAGAAATGTGGATTTTGCATCTGCTGGTGAAGAGAGTATAACAGCAGTTGAGGAGACTTCATCTGATGTCTTCTCAGATCCCAACAGTCCACTCAGACATTCAAACTCCATAGAGAATGATTCAGATAGCAGCACCGGGTCGATTCTGTTTGCCAATGAGAAAGTTGAAGATCAAGAAACAAGCGGAGTAGATTCGCCTCTTCCCGTTTCCTCTCAACCGAGCATTGAGTTTCCGGTAGTTCAGTCTAATGACGAAGAGAACACCACAGATTTAGATAAATCTGTGGCCGTGACTAAGGAGCGTAATAAGCCTTTTCCAGGGAA…	710	1	AT4G29950.2	microtubule-associated protein		similar to RabGAP/TBC domain-containing protein [Arabidopsis thaliana] (TAIR:AT2G19240.1); similar to unknown [Populus trichocarpa x Populus deltoides] (GB:ABK96719.1); contains InterPro domain RabGAP/TBC; (InterPro:IPR000195)	66.14	251	54	4	50	709	443	690	6e-74	273
MMN1.Contig_141	GATTATCTTCTAAACTTCATCAAAAAAGTTCTCCTTAAGTCTCACCTCTCGAAATCTTGAACATTGGTAAAATCATATATTCCATAAGATTTGTTCCAGATGGGTTTSGATGATTCATGCAACACAGGTCTTGTTCTTGGATTAGGTCTYTCACCAAGTTTCAAACAATTACAATAATACCATCAAACGTTCCTCCGGCTACAAGTCCGACCCATCGTTGACTCYAAGCCTCTCCGGCGATCCATCAATGATGGTGGTCGCCGGAGCTGACCTGCTCTGCCGTCAGACTTCATCTCACAGCGGAGTCTCTTCTTTCTCAACCGGAAGAGTAGTGAAGAGAGAGAGAGACGGCTGCGAAGAGTCGCAGGAGGAGGAGGAGAAGGAGAAGACGGAGAGACT…	831	2	AT2G22800.1	HAT9 (homeobox-leucine zipper protein 9); DNA binding / transcription factor	Encodes homeobox protein HAT9.	Identical to Homeobox-leucine zipper protein HAT9 (HAT9) [Arabidopsis Thaliana] (GB:P46603;GB:O82763;GB:Q0WP63); similar to HAT22 (homeobox-leucine zipper protein 22), transcription factor [Arabidopsis thaliana] (TAIR:AT4G37790.1); similar to hypothetica	81.82	209	38	2	158	784	20	225	1e-85	297
MMN1.Contig_1410	ATAATAATAATATTATTATTAATGACAGAAATAATAGTAATAATAATTATACTAATGATGAAAACTCTGGTAGTGACTCTGAGAGAATATAATGATAGGAATGTGAAGCTGTTGATTTGGTTTGTTTAAATCGCTTGTTATTATACTCTTGAAGATTTTTGTGTATATGGTAAAAAGCCTTTAATTGATTAATAAACTTAAATTAATCATATATTTTCAAAAAGATCTCTATAAATTAAAAAAAAGATGTATTTATGGCACATCGATCCTCAAAAAGATTTCTAAACAATTAATATGTCGCGTGGGATTTTTTTTTAGTGAACATGGATATAATTGATTTTAATTAGAACCTGTTCC	357	1	no significant hit
MMN1.Contig_1411	GGAAAAACAAAACAAAACCCTCAAATCGCTACTTGTTATCAATCATCGATGGCGGCCAAGAGATTCGGTGGAGCCGGTAAATCTGGCGGCGGAGATTCAAACATCATGGCGAAGATATCCAATTCCGAGATCGTCTCGCAAGGAAGACGCGTCGCCGGAGATGCCGTCGGAGTGTCGAAGAAACTGCTGTGGAGCACGGGAAAAGCGGCGTGGATCGCGGGCACGACTTTTCTGATCCTGGTCGTGCCGTTGATCATCGAGATGGATCGCGAAGCGCAGCTCAACGAAATAGATCTTCAGCAGGCTAGCCTCCTCGGAGCACCGGCGCAAAGGGGATTCTAGAAAACTTTTCTCTGTTTTATTTATCAGTTTTCTGTAATGGGTTTTATCATAAAGTTC…	514	1	AT5G43970.1	TOM22-V (TRANSLOCASE OUTER MITOCHONDRIAL MEMBRANE 22-V)	Subunit of the TOM complex, a translocase in the outer mitochondrial membrane that selectively allows proteins with a mitochondrial targeting sequence to enter the mitochondrion.	Identical to Mitochondrial import receptor subunit TOM22 homolog 2 (TOM22-2) [Arabidopsis Thaliana] (GB:Q9FNC9); similar to TOM22-I (translocase of the outer mitochondrial membrane 22-I) [Arabidopsis thaliana] (TAIR:AT1G04070.1); similar to unknown [Popu	80.81	99	16	2	49	336	1	98	3e-32	134
MMN1.Contig_1412	GGAACCAACTGTCCTCCGGGAACCCCTAAAGAGAAAAAAATCCTCATCAATTGCCTTCTTCCTCAAGAAACCTCTTTCCTCTTTCAATTTGAATTTCCCAAAAAAAAAAAAAATTCAAAATGGTGTTTAACTCTTCTAAAACCAGATCCAGCGGGCCGGTGCTACGCTCCGTATCACCGTCAGGTCGTTTCTACGGCGGCGTATCGTCTCCTTCCTCATCAGGCTTCGCTTCCTCCACAAGCTCGAGCTTCTCGTCTACATCCTTTTTCAGCAACCGCCGTCAACAGCAACATCCCCACCACAGATCCGCGTCTCCCGCCCGCGTGAACCTCTTCACCTCAACGCCGTTGAACCAGTCGTTCCGTTACTCGATCGATAACAGATCCGTCTCCCCCAACC…	727	1	AT5G25280.2	serine-rich protein-related		similar to serine-rich protein-related [Arabidopsis thaliana] (TAIR:AT5G11090.1); similar to serine-rich protein [Brassica rapa] (GB:ABL97972.1)	71.98	207	46	4	141	725	9	215	5e-68	254
MMN1.Contig_1413	CAATTAGGAGAGGAGCAAGAGAGGAGACGTGGTGGCCATCCATGGAGGAATATTTTAAAGGGTGGTTTTGGTGTGAGGATTTTAGGATGTAGACTCAATTTAGTTTTTCATGATAACCACAAATGAAACATATCTGCCAGGAGAATGGTTTTATTTAGGCCCTGACAGTAGTAACTGTGGTCTATTTTGGCTTCCAAACACTACTACTCTTTTTGGTGTTAATATGCTATTGTCTGAGACTTTTTTTTACCGACCCTCGTTCTTCTCTGCAAACATTCTCATTTTTATGACAGAAGAAGCCCCTTTCTTTG	311	1	AT4G31880.1	binding		similar to binding [Arabidopsis thaliana] (TAIR:AT1G15940.1); similar to unnamed protein product [Vitis vinifera] (GB:CAO44270.1); contains domain PTHR12663 (PTHR12663); contains domain SSF63748 (SSF63748)	47.06	17	9	0	12	62	610	626	3.7	26.6
MMN1.Contig_1414	GACATCAAAAGCTAATATGGCTACAAGGGAAGAGAAAGATAAGTATAGATCAGTCCTTAACGATGTAGGAGAGGTCCAATGGAGGTATGGTCACCCTCCAGCTTTTGCTCTTGTGAACCAGCTCTTTGAAGAAGGCCAGACCAAGGTATGGCCAGAAGGATCCTTGGAAGAGACGGTTCAAAACGCGATCAAGTCATGGGAGATGGAGTTCTCACACAAGATCCGTTTACAAGACTTCAAGACTATAAACCCTGATAAGTTTAAGCTATTTGTCAATGGGAGAGAAGGATTATCGGCTGAAGAAACGCTTAGGCTTGGGAGTTACAATGCTTTGCTCAAGACCTCTTTGCCTGGAGAGTTTCAGTACTATAAACCAGAAGAAGAAAGCTTTGAGTCATC…	770	1	AT1G78780.2	pathogenesis-related family protein		similar to hypothetical protein [Vitis vinifera] (GB:CAN63863.1); contains domain NTF2-like (SSF54427)	92.02	238	19	0	17	730	1	238	1e-127	452
MMN1.Contig_1415	GAGAAGATTAATGCACGAATGAAGCTACTACAGGAACTGGTCCCAGGCTGTGATAAGATTCAAGGTACTGCGTTGGTGCTGGATGAGATCATAAACCATGTCCAGTCTTTACAACGTCAAGTGGAGATGCTATCAATGAGACTTGCTGCAGTAAACCCCAGAGTAGACTTCAATCTCGACACCTTATTAGCCTCAGAAAATGGTTCTTTAATGGATGGGAGCTTTAATGGTACAGCAATGCAGCTTGCTTGGCCTCATCAAGTCACCGAGACTGAACAATCCTTTCATCACCGGCAACTGCAACTGCAACAACCACCACAACCGCAGCAATGGCCTTATGATGGCTTGATCCAGCCGGCTTGGGGAAGAGAAGATGATCAAGGTCATGGCAATGAACAC…	654	1	AT3G57800.2	basic helix-loop-helix (bHLH) family protein		similar to basic helix-loop-helix (bHLH) family protein [Arabidopsis thaliana] (TAIR:AT2G42300.1); similar to unnamed protein product [Vitis vinifera] (GB:CAO23529.1); contains InterPro domain Basic helix-loop-helix dimerisation region bHLH; (InterPro:IPR	82.39	159	28	1	1	477	224	379	6e-69	256
MMN1.Contig_1416	GGGTTTCACAGCTTCGGAGAAAAGAAAAAGAGCATTTCGTCGTTTCTGAAGCGAGAACCCAAAATCGATCGAAGAAATGGCGGATCAGCTAACGGACGAACAGATCTCCGAGTTCAAGGAAGCGTTTAGCCTCTTCGACAAGGATGGCGATGGTTGCATCACCACCAAGGAGCTGGGGACAGTGATGCGGTCCCTAGGACAGAACCCAACAGAAGCTGAGCTCCAGGACATGATCAACGAAGTGGACGCGGACGGGAACGGCACCATTGACTTCCCTGAGTTCCTAAACCTCATGGCCAAAAAGATGAAAGACACGGACTCGGAGGAAGAGCTCAAAGAAGCTTTCAGGGTGTTCGACAAAGACCAGAACGGGTTCATATCCGCTGCAGAGCTCCGCCA…	553	1	AT5G37780.1	CAM1 (CALMODULIN 1); calcium ion binding	encodes a calmodulin that is involved in thigmomorphogenesis. Gene expression is rapidly induced upon a variety of abiotic stimuli, including water spray, subirrigation, wind, touch, wounding, or darkness.	Identical to Calmodulin-1/4 (CAM4) [Arabidopsis Thaliana] (GB:P25854;GB:Q03510;GB:Q9FJ05); similar to CAM4 (CALMODULIN 4), calcium ion binding [Arabidopsis thaliana] (TAIR:AT1G66410.1); similar to Os05g0491100 [Oryza sativa (japonica cultivar-group)] (GB	99.33	149	1	0	77	523	1	149	4e-81	296
MMN1.Contig_1417	GAAATAAAAAAGATGCAAAGCCGTTTCTTCTTCTTCATCATTGTTATCTCTCTCTCCCCCATCTTCGTTTCCTCCCTGATCGCTACTTTCTGCAACGAAGACATGGCCATGCTCGGAGGCGTTCGCGATGTACCTGCTAACCAGAACAGTGGTGAGGTCGAGAGCCTCGCTCGTTTCGCTGTCGATGAACACAACAAGAAAGAGAATGCACTGCTAGAGTTCGCGAGAGTGGTGAAGGCGAAAGAGCAAGTTGTGGCGGGAACGATGCACCACCTGACTCTGGAGATCATCGAGGCTGGGAAGAAGAAGCTTTACGAGGCTAAAGGGTGGGTGAAGCCTTGGTTGAACTTCAAGGAGTTGCAGGAGTTCAAGCCCGCTAGTGATGATGGTGCCTCTTCT…	722	1	AT3G12490.2	cysteine protease inhibitor, putative / cystatin, putative		Identical to Cysteine proteinase inhibitor 6 precursor (CYS6) [Arabidopsis Thaliana] (GB:Q8H0X6;GB:Q8VZA2;GB:Q9FUB0;GB:Q9LHF9); similar to cysteine protease inhibitor, putative / cystatin, putative [Arabidopsis thaliana] (TAIR:AT5G05110.1); similar to At	82.77	238	38	3	13	717	2	233	1e-94	342
MMN1.Contig_1418	GGTATTTCACCATTCTCTCTCTCTCCTCCAAGATCTTCCAATCTCCCTTCATATCTTGTTTTTTTTTTTTTTTTTATGATTTTCAATATTCAAAAACAAAACTGTTTCCAAGAGCACCGTTAGTTTTCTATTTTCCCACGAGCTGACAGTGAATTTTCGTTGTTTTTAGCAAAATTTTGATCCGAACGATGCTCGAGAGAGCTAATTTACGATTTGTTTCTATCTGAATTTCCTCAAAGATTTTGTTTTTCTTACTTCCTCTTGCGCCAATTGCACTAAGCAATCCTCGGGGTTTGTGATTTTGTGTTCCGATTGGTTTTTAAATTTTTTAGGGTTTGATTGGATCGGATCCTCGAATTGGACTTTGATTTGGTTTTATTACTACTAGGATCGTCCCTC…	736	1	AT2G43220.1	DC1 domain-containing protein		similar to DC1 domain-containing protein [Arabidopsis thaliana] (TAIR:AT4G01910.1); similar to DC1 domain-containing protein [Brassica oleracea] (GB:ABD65623.1); contains InterPro domain Protein kinase C, phorbol ester/diacylglycerol binding; (InterPro:IP	39.47	38	23	0	182	295	310	347	9.9	27.3
MMN1.Contig_1419	AAGCACCGGCATCTACGCAAAGAGGCCATTACGTGCCGGTAAGCAGAGGTATCAACTGCAGAGTCACCATTACGGGCGGGGATACAAAAAAAGTTTAATTTTCTGTTCCCATTCCTACAAAAATGTCCGCTCTTGCACATTTAAACAATCTCGATCTCTCCGACTCCTCTGATAACATCATTGCCGAGTACATATGGATTGGTGAATCATGCTTGGATATGAGAAGCAAAGCAAGGACTTTGCCGGGACCAATGAAGGATCCATCGTAGTTACCGAAATGGAACTATGACGGTTCATGCACCGGCCAAGCCCCCAGCAATGACCGTGAATTCATCCTCTACCCTCCAGCTATCTTCAAAGATCCATTCACAAGAGGCTACAACATCCTTGTGATGTGTG…	756	1	AT5G16570.1	GLN1;4 (Glutamine synthetase 1;4); glutamate-ammonia ligase	Encodes a cytosolic glutamine synthetase, the enzyme has high affinity with substrate ammonium	Identical to Glutamine synthetase cytosolic isozyme 1-4 (GLN1-4) [Arabidopsis Thaliana] (GB:Q9FMD9); similar to ATGSR1 (Arabidopsis thaliana glutamine synthase clone R1), glutamate-ammonia ligase [Arabidopsis thaliana] (TAIR:AT5G37600.1); similar to ATGS	69.15	201	62	0	123	725	1	201	6e-70	260
MMN1.Contig_142	GATAATCKGAATCTATTACTTTAGTCATCTTCTTTGAYTCAAGAGCAAGTTTCCAAAGAAAAATGTCAGGAAGAGGAAAGGGAGGAAAGGGATTGGGAAARGGAGGAGCGAAGAGACACAGGAAAGTTCTGAGAGACAACATCCAAGGAAWTACCAAGCCTGCGATCAGGCGTCTTGCTCGCAGAGGAGGCGTTAAGCGAATCAGCGGTTTGATCTACGAAGAAACGAGAGGAGTTCTGAAGATCTTTCTCGAGAATGTGATCAGAGACGCCGTCACTTACACCGAGCACGCGAGGAGGAAGACGGTGACGGCAATGGATGTGGTTTATGCTTTGAAGAGACAAGGACGTACTCTCTACGGATTCGGTGGTTGAATCGTTTTCGATTTGTTGTGTTGTT…	499	2	AT5G59970.1	histone H4		Identical to Histone H4 [Arabidopsis Thaliana] (GB:P59259;GB:P02308); similar to histone H4 [Arabidopsis thaliana] (TAIR:AT5G59690.1); similar to histone H4 [Arabidopsis thaliana] (TAIR:AT3G45930.1); similar to histone H4 [Arabidopsis thaliana] (TAIR:AT3G	98.78	82	1	0	126	371	22	103	4e-40	160
MMN1.Contig_1420	GGAACGAAATTGATTTGAAAAAGGAGATTCTCTCTCCTCCAAAATACGCTCTCGCCTCTCTCCACCTTATCTCTTCGTTGAAAAGCTTGCGACTGTCTTGCCTCCGGCTCGGACGGCGCGTGGCGGCGCGTACCGGCGTCCGGAGGGCTCTCCTCCTAGATTAATCTCTTTTGCTTTGCTGTCGGCTCATCACCGGTCTTCCTCCCCTCCGATATGCACGGTGTCGTGGGCTAGGGTTTGATGCCGGAGAGAGCTCTGCTGCAGAGGCGTTTCTTCTCCGGTGGTCTCTCCGTTTCTCCGTGACTTCGGCGAGGAGGGCGAGAGGCTGGTGGAGGTTGCAGTCGGCTTTTTGGGTGTGGATCGAGTTCGATTTTCATCTTTAGATCTCGTCCGGTTCCC…	762	1	no significant hit
MMN1.Contig_1421	TTAAGGGGAGCATCATATCTCCGTAGCAATGACTATTGTTCCACAAATATCTTCTTCTATCCTCCTTACACTATGCCTCACTCTCTTCACAGGATCTGCCCTCTCAAACTACCTTAACCCCTTACAAGACTTCTGCGTAGCTGATCTCCCAACGACCCCATCCAACACTGGCTACCCATGCAAGTCACAAGTCACCTCTGAAGACTTCTACTACTCCGACTTAATGCTCTCCACTAATCACTTCAAACCCATAATGTGTAACCGCTAATATAGCCAAGCTCAATACGTTTCCGCGACTTAACACGTTGGGAATCTCCTTGTACAACGTTGCATTCACTGCACGAATAGCTAACCCGCCTCACTCGCACCCGGGTCTGATCTAAGTAAAGATCGTGATCG…	786	1	AT1G74820.1	cupin family protein		Identical to Germin-like protein subfamily T member 3 precursor [Arabidopsis Thaliana] (GB:Q9S772;GB:Q1PFD3); similar to germin-like protein, putative [Arabidopsis thaliana] (TAIR:AT1G18980.1); similar to germin-like protein [Ananas comosus] (GB:AAM28275.	43.33	150	80	4	246	680	81	224	8e-32	83.2
MMN1.Contig_1422	GACTTCTGTTGTGTAATCAATCAAGCTGCTGTGGGAGGTGGCTGAACAAAACCCTAATCTCCATTTCCCCCGAATATGCCATTTCTGAGGATTGTGAGACTTCTGCTGCCTGGGATCAGGATCTTGATTATAAGGTCGCTACTTTGGTTGCTGTAGATGCATATCCGTGAATATATTCCTTCTTGGATCTTCCAGTTATTTGGTTGCATGGGAGGTTGTTTTGGGAGCTGTAATAAACCACCACCGCTTATAGTTGCAGTGGATGAGCCTTCTAAAGGGTTAAGGATTCAAGGTCGTTTAGTCAAGAAGCCGAGCGTATCAGACGATTTCTGGAGCACGAGCACCTGCGATATGGATAACAACAGCACGATGCAGTCACAGAGAAGCGTGTCTTCTATT…	782	1	AT5G25360.1			similar to unknown protein [Arabidopsis thaliana] (TAIR:AT4G32342.1); similar to unknown [Populus trichocarpa] (GB:ABK93715.1)	83.72	172	28	3	157	672	1	169	1e-63	239
MMN1.Contig_1423	CAGGGCGGTGTTCTTGGACAGGATCAAGAAAGCTTACCAGAGGAACCCCAATCTTGCGAGCTTGGTGGTCGATCCTGATTTCGCTAAAGAGATGGTTCAGAGGCAGGCAGCGTGGAGGAGAGTCGTGGGTTTGGCCATCTCTGCTGGGATAAGCACGCCTGGTATGTGCGCGAGTCTTGCCTACTTTGATACTTACAGGCGTGCTAGATTGCCTGCGAATCTTGTTCAGGCGCAGAGAGATCTCTTTGGAGCTCATACGTATGAGAGGACCGATCGTCCTGGTGCGTACCACACTGAATGGACTAAGCTTGCTAGGAAGGGGAATTAGATTGTTGAGGTTATCCTCTCTTTCTCACGCTTTGTCTTGTGCTTAATTCTGAATTCAGTGTGCTTGATTTT…	563	1	AT5G41670.2	6-phosphogluconate dehydrogenase family protein		similar to 6-phosphogluconate dehydrogenase family protein [Arabidopsis thaliana] (TAIR:AT3G02360.2); similar to 6-phosphogluconate dehydrogenase family protein [Arabidopsis thaliana] (TAIR:AT1G64190.1); similar to 6-phosphogluconate dehydrogenase family	100	106	0	0	2	319	380	485	6e-57	216
MMN1.Contig_1424	GCTTCTTGCAGGTTTCTCCATCCCTTATCCCGAACGGAGCCCACAGGCCCTCCCTGCTACTTGCTTCCGCTCTGCGTACCGCATGCCTAAATCATTGTATTATCCCTACCAACTAATACGAGTTGATTCCCGGATGCTAGCTTTGCCGATGACAGATACGGACAAAATTGTCCTTTCTTATAAACTTTTGTAATTCTCATATCGCCTAGTTATATCTCTGCGACACAGAATTACGATCTCGTTATTTATTTGCTGAAACTATATCTATAATCGCTTGGACCATAAAATTTCAGACTATACCATTATTATGTACAATAGAAATCAACATGAACAAAAAAAAACATGTCCCCCGACTCGCTCCTCCACAACATTCCTACACTGTTGTGATCGAGGCCGGGA…	740	1	AT1G74820.1	cupin family protein		Identical to Germin-like protein subfamily T member 3 precursor [Arabidopsis Thaliana] (GB:Q9S772;GB:Q1PFD3); similar to germin-like protein, putative [Arabidopsis thaliana] (TAIR:AT1G18980.1); similar to germin-like protein [Ananas comosus] (GB:AAM28275.	45.86	133	72	0	294	692	94	226	1e-19	93.6
MMN1.Contig_1425	GAACAAACTTTGTTCCGGCCACGCTCTCTCTTCTCCGTCCGAGTGTCGTCTCTCTCTACTCTCTCTCTCCGTCGCCGAGTGACTCCATCTGAAGAAGATCGGAGTTTTGTAGCTGATTCGCTGTTGATACTAATTCAGCAGCCATGAGCTCGGTTTTGCAGGGTTTTACGAAGTCACTCGCCATGACTTTTGTCTCCGAGATTGGTGATAAGACGTTCTTCGCCGCCGCTATTCTGGCGATGCGTTATCCTAGGAGACTTGTGTTGGCTGGTTGTGTATCGGCTCTGATTGCTATGACTATCCTCTCTGCTACTGTTGGATGGGCTGCTCCAAATCTGATCTCTCGCAAATGGACCCATCGCATAACAACGTTGTCGTTCTTTGGTTTTGGGCTATGGT…	660	1	AT1G25520.1			similar to unknown protein [Arabidopsis thaliana] (TAIR:AT1G68650.1); similar to unnamed protein product [Vitis vinifera] (GB:CAO42107.1); contains InterPro domain Protein of unknown function UPF0016; (InterPro:IPR001727)	72.47	178	43	3	144	659	1	178	9e-63	236
MMN1.Contig_1426	GATCATCACAAACATCATCATCATATCTCCCTAGCAATGGCTAATGTTCCACAAATATCTTCTTCAATCCTTCTTACACTCTGCTTCACTCTCTTCACGACTCCACCCCTCCCATTCCACGAATTACACATTCAAATTCGATATAAGT	148	1	AT2G04620.1	cation efflux family protein		similar to cation efflux family protein / metal tolerance protein, putative [Arabidopsis thaliana] (TAIR:AT3G12100.1); similar to cation efflux family protein / metal tolerance protein, putative [Arabidopsis thaliana] (TAIR:AT3G12100.2); similar to unname	47.06	17	9	0	4	54	5	21	0.94	21.9
MMN1.Contig_1427	GACCAAGGAGAAGAGTCTCTCTCTCTCATAACTTTCTGAAGCAAACAGCTCGATCTGATTTCCCGAGATTTGATCGTTTCTTCTTGATCGTTTACCACGGATCTGGATCTGGAGCTGTGTTAAATGGCGTACGTGGATCATGCGTTCTCTATATCGGACGAGGACATGATGATTGGGACTGCATACGCCGTGAATAACCGACCGCCGGTTAAGGAGATCGCACTCGCGGTGGCGCTACTCGTGTTCGGAGCCTTAGGAATCGTCTCAGGCTTCTTCATGGCGTGCAATCTAGTTGGCGGTGATCGAGGCCACGGGATATTCTTCGTGGTCCTGGGGTGTCTGCTCTTCATTCCAGGGTTTTACTATACTCGGATCGCCTATTACGCTTACAAAGGATAC…	656	1	AT4G29850.1			similar to unknown protein [Arabidopsis thaliana] (TAIR:AT2G19350.1); similar to hypothetical protein [Vitis vinifera] (GB:CAN75495.1); contains InterPro domain Protein of unknown function DUF872, eukaryotic (InterPro:IPR008590)	90.29	103	10	0	124	432	1	103	1e-42	169
MMN1.Contig_1428	GATAAAAATTAAGCTCAGTGTCTTATAAGCAGCTTACCTCTCCACAGAAATCTAATTCAAAAAGTATCTGCCAATGAGGAGTCTTATATTTCTCGCAATTCTATCTCTCTTGGCTTTAACCCTTCCAATAGCCATTGCTTCTGACCCAAGCCCCGTTCAAGACTTTTGTGTCGGCGTAAACACCCCATCCAATGGTGTGTTTGTCAACGGAAAGTTTTGCAAAGACCCAAAGCTCGCCACAATAGACGACTTCTTTTTCACAGGGCTTGACAGGCAAAGAGTCGCAACTAATGCAGTCGGAACAAATGTGACAGCTGTCTTTGCTGATAACCTTCCTGGGCTCAACACCCTTGGAATAGCATTTGCTCGTGTAGATTATGCACCAAACGGGCTGATCCC…	761	1	AT5G38940.1	manganese ion binding / metal ion binding / nutrient reservoir		Identical to Germin-like protein subfamily 1 member 11 precursor [Arabidopsis Thaliana] (GB:Q9FMA8;GB:Q52K86); similar to germin-like protein, putative [Arabidopsis thaliana] (TAIR:AT5G38930.1); similar to germin-like protein 3 [Vitis vinifera] (GB:AAQ631	67.01	197	65	1	143	733	26	221	4e-74	274
MMN1.Contig_1429	TTTAAGGGGGAAGATAAATTAGATTGATCATCATAAAATTGACTGACCAATAAAACATTACCAACAGAATACTATATGAATACCGACGAAGGTTTCTGAATCCACGTTGACCTGTGAACCGAGATAATGATTCCTTTCCTCACCATCTCCAGAACACTCTTCCTCTTCTCTGTCTTCGCCGCTGATGAAGATTTTCCGTCCATTCCCACTACCTTCCACATAGTCATGACCTCCTCTGACGATCTTAATTCCATTCGACAGAAGATTTATAGCGAAAGGAAGATATTCGACATAACCCACCGGTACACTCAGGATAGGCCGGTCTGGGAATCGAGAGAAGGAGTTAAACCGCTCCTGCGTCTAACCACCACTTTGATCAATTAATCCCTCTCTAAAACC…	780	1	AT1G44542.1	cyclase family protein		similar to cyclase family protein [Arabidopsis thaliana] (TAIR:AT4G34180.1); similar to unknown [Populus trichocarpa] (GB:ABK95930.1); contains InterPro domain Putative cyclase (InterPro:IPR007325)	64.29	14	5	0	576	617	154	167	2e-25	21.9
MMN1.Contig_143	GCAGTGGTATCAACGCAGAGTGGCCATTACGGCCGGGGAGAAATAAACACACATGCATATATACAAACAGAAGAAAAATAAAAAGAACTGATCAGAAGAAAGAAAAAATGAAGAAGACAGGGAGATTAGGGAAAGAGAGAATAGCATCTCAAAAAGAAGAAGAAGGAACAGTGAGGAAAGGGCCATGGACAATGGAAGAAGATTTGATCCTCTTTAATTACATACTTAATCATGGTGAAGGTCTTTGGAACTCTGTCGCCAAAGCCTCTGGTCTAAAACGTACGGGAAAAAGTTGTCGGCTCCGGTGGCTGAACTATCTCAGGCCAGATGTGCGGCGAGGGAACATAACAGCAGAAGAACAGCTTTTGATCATTCAACTTCAGGCTAAGCTTGGAAACA…	785	3	AT3G01530.1	AtMYB57 (myb domain protein 57); DNA binding / transcription factor	Member of the R2R3 factor gene family.	similar to ATMYB21 (MYB DOMAIN PROTEIN 21), DNA binding / transcription factor [Arabidopsis thaliana] (TAIR:AT3G27810.1); similar to MYB24 (myb domain protein 24), DNA binding / transcription factor [Arabidopsis thaliana] (TAIR:AT5G40350.1); similar to My	78.54	205	42	5	108	716	5	204	3e-87	318
MMN1.Contig_1430	GTAAACAGAAACACGTCGACGATCTAACGGCTCAGATCAATCAGCTTTCGAACGACAACCGTCAGATCTTGACGAGTCTCACCGTCACAACTCAGCTTTACACGAAGATCCAAGCGGAGAACTCTATCTTGACCGCCCAGATGACGGAGCTGAGCACCAGACTCGAGTCGTTGAATGAGATCGTCGATCTCGTGACGGCCACCAACGGTGGGTGTCGATCAGATCGACGGCTGTGGATTCGATGATCGTACGGTTGGGATTAATTGCGACGGTTATTACGATGATATGATGAGCGGCGTTAATCCTTGGGGTGGTTCGGTTTACTCTAACCAACCCATCATGGCTAATGATATGATGAATATGTATTAAATTAAAATTAATTATAAAAACTAGTGTACT…	596	1	AT2G18160.1	ATBZIP2/GBF5 (G-BOX BINDING FACTOR 5); DNA binding / protein heterodimerization/ transcription factor	Encodes a b-ZIP transcription factor.	similar to ATBZIP44 (ARABIDOPSIS THALIANA BASIC LEUCINE-ZIPPER 44), DNA binding / protein heterodimerization/ transcription factor [Arabidopsis thaliana] (TAIR:AT1G75390.1); similar to bZIP transcription factor bZIP124 [Glycine max] (GB:ABI34666.1); conta	83.33	54	7	3	211	366	121	171	1e-46	88.2
MMN1.Contig_1431	TGATGTTAAAATTAAGTGGGACTATGGTCAACGTCAAATTTACATTTATCTATTGACTGATCTTCTGATGTCAATTTTTGGTAGCAAGCTGGTGGTTCCATTGTTATGGATGCTGATGCTACATCAAAATTGCACAAGGCTGGTGTTTTAGCAACAGATGACTCTTTTAAATACACTTGGTTCAAGGATCACGAGAGTGAAGTAAAGGCTATCTACACTGGCTCTGCTTTTCTGGAAAGTTCAGCTGCTGGCGATAATGTTGGACTAGTTTTGACGTCGTCTAGTTTCTATGCTGAGCAGGGTGGTCAGATTTTCGATACAGGACTTATTGAAGGCTCGTTTGGTACATTCAACGTATGTAATGTCCAAATATTTGGAGGCTTTGTTCTTCATATTGGT…	764	1	AT1G50200.1	ALATS (ALANYL-TRNA SYNTHETASE); ATP binding / alanine-tRNA ligase/ ligase, forming aminoacyl-tRNA and related compounds / nucleic acid binding		Identical to Alanyl-tRNA synthetase, mitochondrial precursor (ALATS) [Arabidopsis Thaliana] (GB:P36428;GB:O04159;GB:Q8GUG2;GB:Q9SX40); similar to EMB1030 (EMBRYO DEFECTIVE 1030), ATP binding / alanine-tRNA ligase/ ligase, forming aminoacyl-tRNA and relat	92.48	226	17	0	85	762	511	736	1e-118	422
MMN1.Contig_1432	CGAGGAAATACTCTTGCTACCGATGATTGATGTTATTATAAAGAAAATGGCTGAATGGTTTAACAAACATAGGAATAAGGCAGCTCAAATACGAGTCATAAAGAAGCTTGTGCCTACAGTGGAAAAGGAGTTGTCAAAAAGATGTTTGGAAGCGAGGTGTTTCGATTTTGTTGAGATAAACAGCTTCCACCTTGAGTACAATGTCAATGGTAGTGACAAAAAGGTTTATACGATTTATTTAGCAAGAAAAATGTGCAGTTGCATGTGTTTTGGTATAGAAAAATTATGTGTGTTCATGCAGCAGCTGCTGCCAAGTTCTTGAGCGTAGGAATGGACCTCCATCTACAAGAGTTTTGTTCAAAATACTATTTGGTGGAGCTGTGGGCATTGACATACTAT…	505	1	AT1G09820.1	pentatricopeptide (PPR) repeat-containing protein		similar to EMB2745 (EMBRYO DEFECTIVE 2745) [Arabidopsis thaliana] (TAIR:AT5G39710.1); similar to unnamed protein product [Vitis vinifera] (GB:CAO17433.1); contains InterPro domain Pentatricopeptide repeat (InterPro:IPR002885)	31.67	60	39	1	95	268	91	150	3	28.1
MMN1.Contig_1433	GAATAGTATGTTAAGATGACTACGGATACCTATGTTCCTTCCTGTCTCTCGGTTCTTGGTCCGAATGAAATTGCTGTCTAGATTTGATCTATGACGATGATTAAGACATTCTGAATAACATCGGATTTTTATATCTTGTTCATTATTTATACTATCTACATAAACATGAGCTTGATGTTGCAGCGTATTACTCAGACCATCAACATGATATTTCTCTTTTAGATTATCGATAAAACCTTCGTCGCCAGCACTAATCAAGCGATGTGCTTTTTTATGAAATTTTTGCTGTGTGGTTCGTGATCATTCTCTCATTGTAGATGACTCTCCTATATGATCTAGCTTGCATGAGCTGTTACTATCTGTATCTCATGCTTAAGCACAGATCAAATAATGACGTAG…	755	1	AT1G25520.1			similar to unknown protein [Arabidopsis thaliana] (TAIR:AT1G68650.1); similar to unnamed protein product [Vitis vinifera] (GB:CAO42107.1); contains InterPro domain Protein of unknown function UPF0016; (InterPro:IPR001727)	30.2	149	102	3	166	606	1	147	0.029	35.8
MMN1.Contig_1434	GACGCCTTCATTCTCGATTCCACTCAAAAAAAATAATCAATAAATCAACAAAACGATCTCCGATCTGTGATCTCTCATGGAAGAAGAATACGATTCTTTCTCCACCTGATGATCTCGTGTACCTGGCCGATCTCCCCAAGAAATCCCATAGGTACAAGGAAATGTTATATTTCATGGAGAAAGACACCTCCGCCATCCACAGAAATGAACTCACCAACGAGTAACGAAACCTCCTCTCCTGCGCTTATCTAAGCCTCATCTGCGTCCGACGAGCCTCCCGGATCATCATTTCGTCAATCCAATACAAGGAAGATAGCCGCGTCGACGACCACCACCTCTTACCCATCCGCAATAACTGATCTTACCATTCGCATACTGATCTCTCTGGAATCTGCGACT…	755	1	AT1G78300.1	GRF2 (GENERAL REGULATORY FACTOR 2); protein phosphorylated amino acid binding	G-box binding factor GF14 omega encoding a 14-3-3 protein	Identical to 14-3-3-like protein GF14 omega (GRF2) [Arabidopsis Thaliana] (GB:Q01525); similar to GRF4 (GENERAL REGULATORY FACTOR 4), protein phosphorylated amino acid binding [Arabidopsis thaliana] (TAIR:AT1G35160.1); similar to GF14 omega [Brassica nap	51.52	99	46	2	108	398	6	101	2e-42	71.2
MMN1.Contig_1435	GAAAGAAACATTACTTGCGACCAAAATTACAGATTCTTGAAACTATTAGTGTTGATACTTGATAGATACCATGGGCTTACTAGATCATCTCTGGGATGATACCGTCGCTGGTCCTAGGCCAGAGAACGGCCTTGGCAAGCTTCGGAGACACCATACCTTCAGTTTCCGGCCTAGCTCCGGTAATGATCAATCGGACGGTGGTAGCGTGAGATCGTACGGTGAAGAATCGCCGGAGGAGGCCGTGAAAGTGACACGTAGCATCATGATAATAAAACCACCGGGATACCAAGGTGGTTCAGCTCCGGTTTCACCGGCCGGTTCAACTCCGCCAGTGTCTCCTTTCTCTGAGCAAACGCAGGAGGAAAGGAACCCTTTCGGTTTAGGAGAAGGTCGACGTCG…	720	1	AT1G56220.4	dormancy/auxin associated family protein		similar to dormancy/auxin associated protein-related [Arabidopsis thaliana] (TAIR:AT1G54070.1); similar to putative auxin-repressed protein [Prunus armeniaca] (GB:AAB88876.1); contains InterPro domain Dormancyauxin associated (InterPro:IPR008406)	81.65	109	19	3	71	394	1	104	4e-45	177
MMN1.Contig_1436	GATCATCACTCAATTTTATATCTCCCATTTTGTTATTGGTGATAGTTCTTTCATTTCATTTCATCATAACTCTAATTCATCTGATTGATTTTACTAGCAAAACATTTCTCATCTATATGGTATTAAATCCCCAGATATTCCTGATAAAAAAAAATAAAAAATAAAACATAAAAAAATGGTTACAGGTGACATGCTTCTCATTCCTCCTGGTGACCCTCACTACGAGATGAACTCTGCGACTTGTCACCCTCGGCATAAGATTGTCCCGTGTAGAGAGTGGCCTAGAAAAATGTTTCGTTCTTGCCCTTTGTTTCTTGCAACTGCTGAATCTCCACTTTGATGTGCTAGAAATATTCAATACTCATCGTAAACCTTCACGTAACTCAGGACTGTTTCACT…	427	1	AT1G74820.1	cupin family protein		Identical to Germin-like protein subfamily T member 3 precursor [Arabidopsis Thaliana] (GB:Q9S772;GB:Q1PFD3); similar to germin-like protein, putative [Arabidopsis thaliana] (TAIR:AT1G18980.1); similar to germin-like protein [Ananas comosus] (GB:AAM28275.	68.75	16	5	0	185	232	154	169	4.6	26.9
MMN1.Contig_1437	ATAAACATACCAATATAGGCGCTCTCTCTCCCCCCACCCAACACACACCAAGCAACCAGGCCATGAGAGAGAGAAACCGCCCCTATATTTCATATAATACATTATATACAAAGTTATCACTACAGGGCCCCGAGATATGTCCCGGGAAATTGCCCCTATAGCGGCGGAGACTCACACACCTTATCATCACACTATCCAGAAAATCGAAAAATATCACTCGTGATGTGATCTACGGACTCTAAAACATTTTGATGCCCTTTCTATGGCACGCGTCCCCATCAAGAGCGGAATCAAGGCCGTAAATTTCTATCAAGAAATCAAAGATATAGAACGACGATAGGATTCGCGGGACTGCCAAGCCCCCGAGAGACAAACAGCCTTTTCAAAAGTCCCCAGGGA…	886	1	AT3G58040.1	seven in absentia (SINA) family protein		Identical to E3 ubiquitin-protein ligase SINAT2 (SINAT2) [Arabidopsis Thaliana] (GB:Q9M2P4;GB:Q0WNH5;GB:Q1ECQ0); similar to seven in absentia (SINA) family protein [Arabidopsis thaliana] (TAIR:AT2G41980.1); similar to SINA2p [Vitis vinifera] (GB:CAB40578	28.57	70	44	2	100	291	131	196	0.69	31.6
MMN1.Contig_1438	CAGAAACCCCCAGAACCCAACAACCCGAATACCGGCTTTATCCCCCGTTTATCCCCCCCGATAAAGGNNNNGACCCCATTTTAAAGAAACCCCCCCCTTCCCCTTTTAAAGTACCCTTTATCCAAATTTTTCGTCCCCCCTTTCGGGACATTTCCCGGGAAATTGGCCCTTTAGGCCGGGGAGAGACTAAAAGGCTACATCCCAAAGGATTACGTCATAAAGATAGCTAACAACGGGAGATCTCTGCTGCGTCAACTATAAAGGATATGTTTTTATCTCGTATCGATTGAAAGAGCTAATCACATACAAAACTCACCAGGTTCCTTAATCTGAACCAGAAGGCTCGTTGCTCTCTGCATCGTGAAATGGTTGATGCCACAGTGATTCGATTTTCAGACA…	752	1	AT1G20510.1	OPCL1 (OPC-8:0 COA LIGASE1); 4-coumarate-CoA ligase		Identical to 4-coumarate--CoA ligase-like 5 (4CLL5) [Arabidopsis Thaliana] (GB:Q84P21;GB:Q9C5H2;GB:Q9LMV8); similar to 4-coumarate--CoA ligase family protein / 4-coumaroyl-CoA synthase family protein [Arabidopsis thaliana] (TAIR:AT1G20480.1); similar to	47.27	55	29	0	191	355	408	462	1e-34	48.1
MMN1.Contig_1439	GGAAGCGTGAGAAATGAAGAAATCTGGAATTCTTGCAGCCTCTATCTCTGCAGTCGCTTCCGCCACGGCCATCTCCGCCGCGTCTACCAACAGCTCCCTATCATTCTCTTTGCCGGAAACCAATCCTTCCCGCCAGGATTCAAAAGAAAAACAGAGGAAGAAGAAAGGTTCGGAAGATGAAGGAGATGAAAAGTTTGCTCCAAGGTTTGATGGGTTAAGATTCATCGAGACGCTTGTTACTGCTCATCGGTGACCTTTTCCATTATTCTCATTTGTCAGAGTTTGCTATATTTTTTTCTCCAATTGATCAAAAAAACAACAAAAATTACTGATTTAAATGTTTCTTTTTTTTTCCATCTCATTATAGTAACTTTGGGTTAATATGTAACACCCTGGAAA…	433	1	AT4G28290.1	unknown protein			76.6	47	10	1	113	250	34	80	1e-08	55.8
MMN1.Contig_144	GGGSGCGAATTGGAAAAATTAACAGCGAARGAACATGGCCCTATCTCAAGTATCTGCGTCTCTCGCCTTCKCTCTTTCCAATCCTGGCGYCATCAAGCTAGGCAGAATCACAAACACATGTAGRGTTCATGTACCGCAGCTTGCTGGAARCMGATCCACTTTCGCTTCTGGTTCTCCTCTGTTGCCATTGAACTTGAGGTTACCTCGTGGAGGAGGAGGAAGTGGGAACAGAAGAGGCGCATCCGTTTCAGTTAGAAGCGASYAAAGTACAGAAGGAGGCAGCGGTTTGGACATATGGCTTGGTCGTGGCGCTATGGTTGGTTTTGCTGTCGCCATTTCTGTTGAGATTGCCACTGGYAAAGGACTTCTTGAGAATTTTGGGGTAGCGAGTCCATTGCC…	590	2	AT4G34190.1	SEP1 (STRESS ENHANCED PROTEIN 1)	Encodes a stress enhanced protein that localizes to the thylakoid membrane and whose mRNA is upregulated in response to high light intensity. It may be involved in chlorophyll binding.	similar to stress enhanced protein 1 [Brassica rapa] (GB:ABV89639.1); contains domain SSF103511 (SSF103511)	71.33	150	40	2	35	475	1	146	3e-27	118
MMN1.Contig_1440	GGCCTGTTCACAAGGTCCTCGGCGGTGGAAAACCGGCGGATATATTCATGTGGAAGAACAAGAAGATGTCTGGTGGAGTACTCGGCGGTGCTACAGCCGCTTGGGTTCTCTTTGAGTTGATGGAGTATCATTTTCTTACTTTGCTCTGCCACGTCATGATTGTTGTGCTCGCTGTGTTGTTTCTCTGGTCTAATGCCACCATGTTTATTAACAAGTCTCCACCGAAGATTCCTGAAGTTCATATCCCTGAAGAGCCTATTCTCCAGCTTGCGTCTGGGCTTAGAGTTGAAATCAATAGAGGATTCTCTTCTCTTCGTGAGATTGCATCTGGAAGGGATCTCAAGAAGTTTCTTGCTGCTATTGCTGGCTTGTGGTTGGTGTCGATCTTGGGCGGCTGGT…	738	1	AT4G23630.1	BTI1 (VIRB2-INTERACTING PROTEIN 1)		similar to BTI2 (VIRB2-INTERACTING PROTEIN 2) [Arabidopsis thaliana] (TAIR:AT4G11220.1); similar to unknown [Populus trichocarpa] (GB:ABK93406.1); contains InterPro domain Reticulon; (InterPro:IPR003388)	95.94	197	8	0	3	593	79	275	2e-106	382
MMN1.Contig_1441	GTGTCGGGAGAGAAGAAGAAGGTCATGAAGGAGGAGGCGCAAGATGAGTATATGATGACGCTTGAGGACTTCTTAGCGCAAGCAGCGGAGATGGACGGTAATGATGATGAAATCGATGTGAAGATTCCGATGAGTCTCTCCGGTACATTCGATTATCCGATGATGCCTCAGCAGCAGAACAATCAGGTGGAGATGGTTGAAGGATCGACGAGGAGAAAGAGAGGGAGAGTGATGGTGGAGGCGATGGACAAAGCAGCGGCGCAGAGGCAGAAGAGGATGATCAAGAACCGTGAGTCTGCCGCGAGGTCGAGAGAGAGGAAACAGGCTTATCAAGTGGAGCTTGAGACTTTGGCTGCGAAGCTTGAGCGAGAGAACGAGCAGCTTTTGAAGGAGATTGAA…	684	1	AT1G03970.1	GBF4 (G-box binding factor 4); transcription factor	encodes a basic leucine zipper G-box binding factor that can bind to G-box motifs only as heterodimers with GBF2 or GBF3. A single amino acid change can confer G-box binding as homodimers.	Identical to G-box-binding factor 4 (GBF4) [Arabidopsis Thaliana] (GB:P42777); similar to bZIP transcription factor family protein [Arabidopsis thaliana] (TAIR:AT5G44080.1); similar to unnamed protein product [Vitis vinifera] (GB:CAO43627.1); contains In	68.86	167	42	3	1	471	95	258	9e-53	203
MMN1.Contig_1442	TATAACGAATAAAGGATTACGGTGGATACTTACGTTCCCAAAGACGAGGAAGGGTGTAGTAAGCGACTAAATGCTTCGGGGAGTTGAAAATAAGTGTAAATCCGGAGATTCCCGAATAGGTTAACCTTTTGAACTGCTGCTGAATCTATGGGCAGGCAAGAGACAACCTGGCGAACTGAAACATCTGAGGAGAGATAGTAAAAGAACGCAAAAGTGATTCCCGTAGTAGCGGCGAGCGAAATGGGAGCATCCTAGACCGTGAAAACGGGGTAGTGGGAGAGCAATAAAAGCGTCTTGCTGCTAGGAGAAGCGGTGGAGTGCCGCACTCTATATGGCGATAGTCCAGCAGACGAAAGCATTAATATTTTATGCTATGACCCGAGTAGTATGGGAGCGGAG…	699	1	AT1G57600.1	membrane bound O-acyl transferase (MBOAT) family protein		similar to Os05g0144000 [Oryza sativa (japonica cultivar-group)] (GB:NP_001054621.1); similar to unnamed protein product [Vitis vinifera] (GB:CAO44765.1); contains InterPro domain Membrane bound O-acyl transferase, MBOAT (InterPro:IPR004299)	50	22	11	0	535	600	308	329	9.1	27.3
MMN1.Contig_1443	GAAGACACATTTCCTTTTTTCTCACCGCCTCCTCGTTTATACCAAACACTGTTCTTTTATCTTCCTGTCCGAATCATAACCAAAAAACCAGACTGAATGGGAGCTGGTACAGTTGTGAGAGATCGAGTACGGAAAGATCTCTCTGAGATTTCCAACAAAACGACGAAACCCATCGTTTCTGCCTCTCCGGAGATTCGTTCAAACTCACGGAAGAAGATCCAACGGCGGAGCAAGAAAGCTGTGATCTCTCCGGTGCAGAAGCTCTTCGAAACTTGCAAGAAAGTATTCGCTAATGGCAAATCCGGAGCCGTCCCGTCCCAAGAACACATCAACATGCTTCGAGCCGTTCTGGACGAAATCAAGGCTGAAGATGTTGATGTGAGCCCTAAGATGCCGTGT…	783	1	AT5G39890.1			similar to unknown protein [Arabidopsis thaliana] (TAIR:AT5G15120.1); similar to unnamed protein product [Vitis vinifera] (GB:CAO14912.1); contains InterPro domain Protein of unknown function DUF1637 (InterPro:IPR012864)	79.91	219	43	3	97	750	1	213	4e-96	342
MMN1.Contig_1444	TTTGATGGAGCCTTCGCGATGGGATTGGTCCTTGTGCTTGATCAGATCTACGGTGACGATTACGTTGAGGTTGGTGGGAACAGGTGCACCCTTCCGCAGTAGATCTTTGATTTCTTCGTCCCTCCCTTCCGTGTGGAAATATTAATAATTGTGAGTTTTTGTCGGCTTGAAAGGAACGATTTGGACAAATATTTTTCTCGGTCTGTCCCTTTTGATGTGATTTGATTTGAGCTAAAGTTGAATTACTCAATTACAGCTGTTTATTTTCAAGAAAGAAAGAAAGTAAGGTGTTAACTTTTAACACAGAGATTAGTTGTAGATAATGGGGAAAAATAAATTTTCCT	344	1	AT1G80120.1			similar to unknown protein [Arabidopsis thaliana] (TAIR:AT3G15810.1); similar to unknown [Populus trichocarpa] (GB:ABK95691.1); contains InterPro domain Protein of unknown function DUF567 (InterPro:IPR007612)	92	25	2	0	1	75	175	199	6e-08	50.1
MMN1.Contig_1445	CTTGTAACCCGTTCCTCCGAAGTTCGAATACAGATATTCGTCGGGCGTTAGGCATTTCAGAGACTGCAGATGATGCAGAAGCTTTAGGGATTATCCGAGAAGCTAAGGATAATTTCAAAGCTTAGGCTTCTAGTCCATAAATATGGTGAAGGTGGACTGCTTTTTTAAATTACTTTTCTTTAAAATACAAAAAGAGAAATATACTTTTTTTTACTTTTAATGTAAACCTTTTATTTTGGTACCCATTAACACCACAATTAGGTTTTTAGATTTTCTTCAAAATTTATGAATACATATAAAATATTTTTCCTTTTTTTTTACAGCAAAATATATTCACCTGTTATGTTATTCTCC	354	1	AT1G06130.2	GLX2-4 (GLYOXALASE 2-4); hydroxyacylglutathione hydrolase		similar to GLX2-5 (GLYOXALASE 2-5), hydroxyacylglutathione hydrolase [Arabidopsis thaliana] (TAIR:AT2G31350.2); similar to unknown [Populus trichocarpa] (GB:ABK93490.1); contains InterPro domain Beta-lactamase-like; (InterPro:IPR001279)	87.5	40	5	0	3	122	291	330	2e-14	73.9
MMN1.Contig_1446	GGCGCCGCCCGCGTCTCTCTCTCTTCGCTTGTTATCTCTTTCCACTCTCTGTAGAAACACAGAACCCTAATCATCAAAATCTCAAGATGAATCGCGAGAAGTTGATGAAGATGGCCAACACTGTCCGCACTGGCGGCAAGGGTACAGTTAGAAGGAAGAAGAAGGCTGTGCACAAGACCAATACAACTGATGACAAGAAGCTCCAAAGCACCTTGAAGAGAATTGGTGTTAACTCCATTCCAGCTATTGAGGAAGTTAACATCTTCAAGGATGATGTTGTTATTCAGTTCACCAACCCTAAGGTTCGAGCTTCAGTTGGTGCAAACACATGGGTTGTTAGCGGTTCTCCTCAGACCAAAAAATTGGAAGATATCCTTCCTCAGATTCTCAGCCATCTAG…	790	1	AT1G73230.1	nascent polypeptide-associated complex (NAC) domain-containing protein		similar to nascent polypeptide-associated complex (NAC) domain-containing protein / BTF3b-like transcription factor, putative [Arabidopsis thaliana] (TAIR:AT1G17880.1); similar to putative transcription factor BTF3-like [Solanum tuberosum] (GB:ABB87130.1)	84.87	152	23	1	87	542	1	151	3e-55	211
MMN1.Contig_1447	GAATCGGAATATGAGCGATCCAATGGGGGAAACTGGATTTTCTGGAGAATCGGCGGAGATGGTCTTCTCCGGGACGGAGATGGCGGCGGCAGAACTGCTTATGCAGCTGAGCGAGGAAGAAACGGTGAGCTGTAGCAGCAGCAACGTCGGAGAAAGTGGAGGAGGTGGCAAGAGAAGACACGAAGATGTTTGCTCGAGAATCAGAAACGACGGCGTAAAAGGCAATTGTAATCTCGGCCGGAAGATGAAGAAGATGAAGGAAAAAAAGTTTCGATCTCTCGAGAGTATTTACATGGCAACGAAGGAGATTAGGGCTTAATTAATGGAAGAAAGGGGATGGAATAATTACATGTTAATCGTTTTTAATAACCTGTGTCAATGGTTTTTGTGTGTATATGT…	539	1	AT2G21780.1	unknown protein			64.86	111	29	4	11	313	1	111	8e-18	86.7
MMN1.Contig_1448	GGGGGAAGCTATGGCGTCGTCTCCGTTGACTACGAATGTTCAGGGTGCCAAAACTAAGATACAATTGAGTGACCAAGAGGGAAATGACTATGCACCCAAGGTGAGGAAACCGTACACGATAACAAAAAAAAAAA	134	1	AT5G17300.1	myb family transcription factor		similar to EPR1 (EARLY-PHYTOCHROME-RESPONSIVE1) [Arabidopsis thaliana] (TAIR:AT1G18330.2); similar to myb family transcription factor [Arabidopsis thaliana] (TAIR:AT3G10113.1); similar to EPR1 (EARLY-PHYTOCHROME-RESPONSIVE1), DNA binding / transcription f	58.18	55	9	2	11	133	1	55	6e-09	55.8
MMN1.Contig_1449	GTAGTAAATTAATCTTCTTTTTTGGCTTCTGACCAAGAAAAAAAAATATTCTTTCAACAGAAGGAGAAAGTAGAGATTTTTTTGTAGTCGAATTCGGAAAAAAATGGCTCTAAGCTTTGGATTGATTTGAATTAAGAAAAACAAAAATGTTTGCAGCTCGGCGTCTTCTTCTTTCCTGCAAACAAGGTGCGAATCAAGCCGCCAGTTTTCTCCGAGGGTTAGTCTTTATTCTTCTTTCTTAAACTCGGTGAGGGGTTTTAACTTATAAAGATTGTTACTTACTTAGTTACTTCATCTCCGAACAATAAAGCTTCGATTTTTATATTTATTATTCTCTGATGGCGTTTTGGGTTTTCTCGAAAAGTTTCGATCTTTAAACATTGTAACGACTTTGAAG	397	1	AT4G39740.1	electron transport SCO1/SenC family protein		similar to electron transport SCO1/SenC family protein [Arabidopsis thaliana] (TAIR:AT3G08950.1); similar to unnamed protein product [Vitis vinifera] (GB:CAO48492.1); contains InterPro domain Electron transport protein SCO1/SenC; (InterPro:IPR003782); con	69.57	23	7	1	147	215	1	20	0.6	29.6
MMN1.Contig_145	GTTTGGAATCGTCAAGGGGACTATGACAACGACACACTCTTACACCGGAGACCAAAGGCTCCTAGATGCATCACACAGGGACCTAAGGCGTGCAAGAGCCGCAGCACTGAACATTGTACCGACTAGCACAGGTGCAGCAAAGGCGGTGTCGTTGGTGCTCCCCCAGCTGAAGGGTAAACTCAACGGCATTGCACTCCGTGTGCCGACCCCAAACGTCTCTGTGGTTGACCTTGTTATAAACGTTGAGAAGAAAGGTTTGACTGCTGAAGACGTTAACGAGGCCTTCAGAAAAGCGGCCGCTGGACCGCTCAAGGGCGTTTTAGAGGTTTGCGACACGCCACTTGTCTCTTGTGACTTCAGGTGCTCTGATGTCTCAACCACCATTGACTCTTCCCTCAC…	811	4	AT1G42970.1	GAPB (GLYCERALDEHYDE-3-PHOSPHATE DEHYDROGENASE B SUBUNIT); glyceraldehyde-3-phosphate dehydrogenase	Encodes chloroplast localized glyceraldehyde-3-phosphate dehydrogenase.	Identical to Glyceraldehyde-3-phosphate dehydrogenase B, chloroplast precursor (GAPB) [Arabidopsis Thaliana] (GB:P25857;GB:Q9C7S2); similar to GAPA-2, glyceraldehyde-3-phosphate dehydrogenase [Arabidopsis thaliana] (TAIR:AT1G12900.1); similar to unnamed	94.42	197	11	0	2	592	251	447	2e-93	338
MMN1.Contig_1450	GACAGACAACTATCTCAGCCCATTGCTGTGTGTATCTGCTATCAGAAAAATGGATAACTATGCTGATTTGTTGGACTGTCCGATTAACGATAATCGTCACTTTCTCCCTGTTGTATACCGCGTTGGCGATCTTGATCTTCCTATCCAGTTCTCCCCTGACTGCTTTGTCCTGAACCTGTTGAGGAAAAGAGATGTCCCTGACGACAAATACTCTCATGCTTTCCTTGTTTTTGGCTCCTGATACCTCCTACTTCCTTGTCGAGCTCACTTACCATTATGGTGAACTCTCGTATGACCTTGGAACTGGATTTGGGCATTTCTCTATGTCCACTCATGATGTTTCCCAGATAGTTGATGCGCCTCCTGCCTCCGGTGGAGATGTCACCAAAGAGCCTGGCC…	772	1	AT1G11840.4	ATGLX1 (GLYOXALASE I HOMOLOG); lactoylglutathione lyase	Encodes a glyoxalase I homolog ATGLX1.	similar to lactoylglutathione lyase, putative / glyoxalase I, putative [Arabidopsis thaliana] (TAIR:AT1G67280.1); similar to putative lactoylglutathione lyase [Brassica rapa] (GB:BAF81517.1); contains InterPro domain Glyoxalase/bleomycin resistance protei	59.68	62	25	0	50	235	1	62	2e-73	76.3
MMN1.Contig_1451	CCTCATGAGCCTCCAATGGTACATTATCATTCAGGTGGGATGCGACTGAATCCTAACCTGTACGAGTCAGGAAGAGTCTGCCTGAGTCTGTTGAATACATGGAATGGCTCTGGCACTGAAATGTGGAACCCAGGGAGCTCCTCAATCCTTCAAGTCCTTCTCTCGTTTCAGGCTCTTGTTCTGAATGAGAAGCCTTACTTCAACGAAGCTGGCTATGATAAGCAGTTGGGCCGAGCTGAGGGAGAGAAAAACTCTGTGAGTTACAATGAGAATGCATTTCTCATCACCTGCAAATCTATGATCTCGTTACTCCGCAAGCCTCCAAAGCATTTTGAGGTGCTTGTGAAGGACCACTTCACGCACCGGGCTCAGCATGTTCTGGCTGCGTGCAAGGCTTAC…	802	1	AT2G33770.1	ATUBC24/PHO2/UBC24 (PHOSPHATE 2); ubiquitin-protein ligase	Encodes a ubiquitin-conjugating E2 enzyme. UBC24 mRNA accumulation is suppressed by miR399f, miR399b and miR399c. Involved in phosphate starvation response.	similar to PFU2/UBC23 (UBIQUITIN-CONJUGATING ENZYME 23), ubiquitin-protein ligase [Arabidopsis thaliana] (TAIR:AT2G16920.1); similar to hypothetical protein OsI_020215 [Oryza sativa (indica cultivar-group)] (GB:EAY98982.1); similar to unnamed protein prod	91.76	182	15	0	1	546	722	903	1e-96	349
MMN1.Contig_1452	GACAAATGAAACCATCAACGCCGAAGGGTGGCTTAAAACAGGAGATCTTTGCTATATCGATGAGGATGGATTTGTTTTCGTTGTGGACCGATTGAAAGAACTGATCAAATACAAAGGCTATCAGGTGCCTCCAGCTGAACTTGAAGCTCTTCTAATCACTCATCCAGACATTCTCGATGCCGCCGTTATTCCGTTTCCGGATAAAGAAGCAGGACAATATCCAATGGCTTACGTGACAAGAAAGGTTGAGAGCAACCTCTCTGAGAAACAAGTTATTGAGTTCATCTCTAAGCAGGTGGCACCGTATAAGAAAATAAGAAAGGTCGCATTTATAAACTCCATACCAAAAACTGCATCCGGCAAAACACTTCGCAAGGATCTAATCAAACTGGCCACTTC…	534	1	AT1G20500.1	4-coumarate--CoA ligase family / 4-coumaroyl-CoA synthase family		Identical to 4-coumarate--CoA ligase-like 4 (4CLL4) [Arabidopsis Thaliana] (GB:P0C5B6;GB:Q9LMV7); similar to AMP-dependent synthetase and ligase family protein [Arabidopsis thaliana] (TAIR:AT1G20490.1); similar to unnamed protein product [Vitis vinifera]	95.56	135	6	0	2	406	416	550	9e-70	259
MMN1.Contig_1453	GAAAGATTGACCGATAAGGAGGGTGGGCATTGGAGGTGATGTCCCTTGGAGAAGAGAGGTTAGGATTCAAGGGTTTGTAGTTTTGGGTTCATTCGTGTTTCTTGTCCCCTCTGTTCGTTCGATTGCTAGGGGAAATAAAAAAGAGGAAGAGGTTTTGTGATTTAGGTTTTTTGGAGAAGAGAGGTTAGGATTCAAGGGTTTGTAGTTTTGGGTTCATTCGTGTTTCTTGTCCCCTCTGTTCGTTCGACTGCTAGGGGAAATAAAAAAGAGGAAGAGGTTTTGTGATTTAGGTTTTTTTTTTTTTTAGTGTGGGTCTGATTCCTAAGGTGAACAAAAGATGGCAATAGCGCGAACTGGAGTTTACGTTGATGATTACCTCGAGTATGCCAGCACTTTCCC…	799	1	AT1G54390.2	PHD finger protein-related		similar to PHD finger family protein [Arabidopsis thaliana] (TAIR:AT3G24010.1); similar to unnamed protein product [Vitis vinifera] (GB:CAO23491.1); similar to hypothetical protein [Vitis vinifera] (GB:CAN71661.1); contains InterPro domain Zinc finger, RI	92.9	155	10	2	338	799	1	153	1e-70	263
MMN1.Contig_1454	GGAAGACCTGTTTCACGAGGTTGTTTACTCCAACCCTGTTTCACTTGACCGTGATTTCTGGAAACAACTAAAGTCTGCGTTTCCTACACGGACCATGAAGGAGATTGTGAGCTATTATTTCAACGTCTTCATTCTTCGAAGACGAGCTGTTCAGAATCGTTCTAGAAGCCTGGACATTGATAGCGGCGATGACGAGTGGCAAGTGGAGTATGATAACACGTTTTATGGCTCTCAAACTCAAGATGAGAGAACCGGAATAAGCTTATCAGGAGATGAAGAGGAAGAGGTGAATGTTGAAGAAGATTCGTGCACGTCCGATGACTTCCTCCAGTCCAATGTAAACAGAGAAGAATCCGATGTTGGGAAGCACTGGCGCCACTGCAGTGATTTGTTGGAAGA…	770	1	AT1G13880.1	ELM2 domain-containing protein		similar to myb family transcription factor / ELM2 domain-containing protein [Arabidopsis thaliana] (TAIR:AT2G03470.2); similar to unnamed protein product [Vitis vinifera] (GB:CAO41886.1); contains InterPro domain SANT, DNA-binding; (InterPro:IPR001005); c	70.37	189	39	5	2	517	238	424	8e-67	250
MMN1.Contig_1455	TACAGAGTATGATGATAAGGTTGGTAGGAAGAGGAAGAAGGAGAAAGAGAGGACTAGTAGTGGCAGTGGGAAGGAGAAGAGGTATAAACTCCCAAGCCGCGGTGAGAGGAAGTCTGAAGAGATTGATGAGATGTGGAAATCTATTGCACGTAACCCTGAGAATGATGAAGAAGGTGTTAGGACTATGGATGACGACAATTTCATCGATGATACTGGTGTGGATCCTTCTGAGAGGTATGGAGGTGATGGGGGAGACCGCTCTCCAACTCATTATCCTCAGGCAGAGGAGGGTGAGGATGATGATGAGGTTAATAACCTTTTCAAGATGGGAAAGAAAAAGAAAAAGGCTG	350	1	AT1G32130.1			similar to IWS1 C-terminus family protein [Arabidopsis thaliana] (TAIR:AT4G19000.1); similar to hypothetical protein [Vitis vinifera] (GB:CAN83660.1); contains InterPro domain IWS1, C-terminal (InterPro:IPR008654)	91.82	110	9	0	2	331	107	216	4e-45	176
MMN1.Contig_1456	AAGCAGAGGTATCAACGCAGAGTGGCCATTACGGCCGGGGGACACGATCTAATAATCTCTCTTCAGTTTTCGAAAAAGCCTTCTTAAATCCTTCTAAAGATTCCTTTATCTAAGAATAAAGAAGAAATTTAACCAAAAGAGATGTGTTATCTGAACAAGGTTTGGATTGCAGCATCGTTCGTGGCTGCTCAAGGAAACCCCGATCACGGCGTCAAGTTGAAAACCGGTCTCAGCTCCGCACACCACCTTCAACGCCGGCTTTCCTCCGATATCCGCCCTCTCTCCGCCACAGCTGACCCCGTAGATGGTCCGCGTGTAGAAGAAAGACGGGTTACCTCTTCTTCCACTCCCGATGAATCTCTCCGTCAGATCATGTACCTCAACTGCTGGAGCCAAGGC…	552	1	AT4G28240.1	wound-responsive protein-related		similar to wound-responsive protein-related [Brassica rapa] (GB:ABV89634.1)	75.58	86	21	0	142	399	1	86	2e-31	132
MMN1.Contig_1457	GAAGTCCAGTCTTCTGCGAGAACCAGAAAAGCGAAAATCGATAGAAATGGATGCGAAGATCGGAAAATTCTTTGACTCCGTCGGCTCTTTCTTCAGCGGCGGCGATAAGATCCCGTGGTCTGAGGGAGATGTCATCGCTGGATGTGAAAGAGAGGTTCGAGAGGCCGCAAACTCTGGCAATGAAGGACTGAAGAAAGAGTGTCTTATGCGATTGTCATGGGCGCTTGTTCATTCCCATCAACAGGATGATGTTCAACGTGGGATAGACATGCTTGAAGCGTCTCTTGCGAACAGTGCTCCTCCGTTGGAAGACCGAGAGAAGCTCTATCTTCTTGCTGTTGGTTACTACAGGAGTGGGGATTGCTCTAAGAGCAGGCAGCTCGTTGACCGCTGTATCGA…	764	1	AT3G57090.1	BIGYIN; binding		similar to binding [Arabidopsis thaliana] (TAIR:AT5G12390.1); similar to unnamed protein product [Vitis vinifera] (GB:CAO63076.1); contains InterPro domain Tetratricopeptide-like helical; (InterPro:IPR011990); contains InterPro domain Tetratricopeptide re	86	150	21	0	47	496	1	150	4e-60	228
MMN1.Contig_1458	CAACTTGAAGAAACCCATAATAATAAAGATCACAACTTTCATTAAAAAAAGCAATTCGATACACCACAAAGATGATCACTTCTTGAGGCTTCCTCTGATTCCAGGTTTCGGTTTGGAAGACGACTCAGGAGCAGCAGCACCAAGAGCCTCGTGGAGATTCTTCGGCTCCTCGTAAGGCAGCTTTGGATGCTTCGACTCGTGATGGATCTGCATCGTCTTCAGATCCGGCGCCGTGATCTTGCAGTGAGGACACTCGTACTTCGCGTGGCCGCCTTTCTCCTTGCCCGTCCTGTCGGCGAGCCCCGCCTTTCCTCCGCCTCTGTTGGTCAGCGCTGCGTCGGCCTTGGCCTGGAGCTCCTTCGCCGCGTGCTTCTTCGGCTTCGCCTTGCCCGTCATCGT…	694	1	no significant hit
MMN1.Contig_1459	GAGAGGAATGGGTGCGTTTTGGGGAACACGGGTGATGGAGATTGTGAAGAAGCATGATTCGGGGGGTCTCATTTGGAAGCGAATCAAGCTTACCTCTACTCGTAAAGCCAATGCCAAAACCCGCCTCCGTCGCGTTTGGCAGGTATGAGAATGAAGCTGTTCTAAAGGCGTGCGGTGCATCAGATGCATCGGGATTTAGCAAGACAGAATGCTGTACCAGTGCGGTTAAAAAATGAGTAAGGCCGAAGATAAGCCTAGTAATTTACAATGGTAGATGAAGTCTCCTTCCTTCTTGACATGGGGTTTTTAACAAAAATAAAATATGAACATTGTCTTGTTGGGTTATTGTTTTTATATGTTGAATCTGCAACGAGTTTTACAAA	383	1	AT1G27435.1			similar to unnamed protein product [Vitis vinifera] (GB:CAO70078.1)	93.48	46	3	0	5	142	4	49	2e-24	95.5
MMN1.Contig_146	GACATCCACCATTCTCATAATAACTTCTCCAAAGCTTACATTTACGGTTACTAGCAACCAATCAAAATCAACTTCCCGATGACGAGTCCAGCGGTTGATCAAGAGAACATCCCTCCTATGGACGTAACCAACACGACGGTGACGGAGCCTGCTGCGAAGGGAGGCAAGACGAAGAAAGCTAAGGAAGTGAAGGCGAAGGCGAAGAAGCCTGCTGCCGCGGCTGCGAAGAAGAAGTCTGTTTCGACTCATCCTACTTACGAAGAGATGATCAAGGACGCGATTGTATCGTTGAAGGAGAGAACTGGATCTAGCCAGTACGCGATTCAGAAGTTCATCGAGGAGAAGCACAAGGTGCTCTCGCCTTCGTTCAGGAAGCTTCTGCTTCTCAATCTGAAGAGG…	1027	4	AT2G30620.1	histone H1.2		Identical to Histone H1.2 [Arabidopsis Thaliana] (GB:P26569); similar to histone H1, putative [Arabidopsis thaliana] (TAIR:AT1G06760.1); similar to histone 1 [Malus x domestica] (GB:BAD00018.1); contains InterPro domain Winged helix repressor DNA-binding	90.32	62	6	0	244	429	61	122	3e-18	89.4
MMN1.Contig_1460	GAACCTCCACGCACTTCCAAACACAGAAAGAGAGAAACAAAAACCATATGGACTTGTTCCTGAAGTCACGGCATATCTCCGTCTCAAGACCCTAAAGAACAAAAAAGATCAGATCTCAAAAATTTTGTGTCACTGTATATCAGATAAACATTTACATACCAATATTTGTGAGCATATATATAATAGAGAATACTATAGAACAACAACG	208	1	AT1G79730.1	ELF7 (EARLY FLOWERING 7)	Encodes a PAF1 homolog that is involved in the control of flowering time by elevating FLC expression to a level that creates the vernalization-responsive, winter-annual habit. Yeast PAF1 is a component of a five-member complex that associates with RNA po	similar to unnamed protein product [Vitis vinifera] (GB:CAO45818.1); contains InterPro domain RNA polymerase II-associated, Paf1 (InterPro:IPR007133)	40	35	21	0	17	121	191	225	6.5	25.8
MMN1.Contig_1461	GGCCGCAACAAAAAGAGAAACGCAATAGGCTTCTTGTAACTAACTCTTCACTGCAACATGACTTTCAAGCGTAGGAACGGTGGCAGGAACAAGCACAACCGTGGTCATGTGAAGCCCATCAGGTGTTCCAACTGCGGGAAATGCTGTCCCAAGGATAAGGCTATCAAGAGGTTCATCGTCAGGAACATCGTTGAGCAGGCTGCCATCAGAGATGTTCAAGAAGCCAGTGTCTACGATGGTTACACTCTTCCCAAGTTGTACGCTAAGACGCAGTACTGTGTCTCATGTGCTATCCACTCTCACGTTGTGAGAGTCCGTTCCCGCACCAACCGTAGGGTTCGTACCCCACCCCCACGTTTCGTCAGACGCAAGGAGGATGCTCCCAAGCCCGGACAACCT…	604	1	AT3G56340.1	40S ribosomal protein S26 (RPS26C)		Identical to 40S ribosomal protein S26-3 (RPS26C) [Arabidopsis Thaliana] (GB:Q9LYK9); similar to 40S ribosomal protein S26 (RPS26A) [Arabidopsis thaliana] (TAIR:AT2G40510.1); similar to ribosomal protein S26 [Pisum sativum] (GB:AAD47346.1); contains Inter	98.78	82	1	0	58	303	1	82	1e-33	139
MMN1.Contig_1462	GAACCGATTTTTTATCTCTTCAATCAATCTCAACCACAGAAATTCAGCGAGAGATTACACTTGTAAATGGCGGAGCAAACCACCGATTCAACCTCTCCTACGGCTCTTGTCTCCACATCGTCTCCGAAGAAAGAAAACACCAATCCTGTTGATTCCAAGCTCACTGAACTAAGCGAATCAAGGGCCGAGTTGCTTAACAGGATCCAAAATCTCAAGCAGGACTTGCAAAGTTGGAGAGGTAAGCTCGACACCCAAGTTCAAGTCTACCGTGAGGAGCTCTCTGGGCTGAAGAAGACTCTTAATCTTGAAGTTGAGCAGCTCCGTGAGGAATTCAAAGACCTTAAAACCACCTTGAATCAGCAGCAAGACGATGTCTCTGCTAGCCTCAAAAGCTTAGGC…	611	1	AT4G15790.1			similar to unnamed protein product [Vitis vinifera] (GB:CAO70981.1)	82.78	151	23	2	67	510	1	147	2e-55	212
MMN1.Contig_1463	GAGACAGCGTTTCATTATCACTTCCGACAAGACTCTTTATACCTTTCCGCACTCCCTTTCCGCCGACCTCCTCCATGGCTCCGATTGCTGTTGGCGATGGTGTACCTGACGGATCTATCTCCTTCTTCGACGAGAACGATCAGCTCCAGACTGTCTCCGTTCACTCCCTCGCCGCCGGTAAGAAGGTCATCCTCTTCGGTGTCCCTGGTGCTTTCACCCCCACCTGCAGCATGAAGCATGTGCCTGGATTCATCGAGAAAGCAGAGGAGCTGAAGTCAAAGGGTGTTGACGAGATCATTTGCTTTAGTGCGAATGATCCGTTTGTGATGAAGGCATGGGGGAAGACGTACCCAGAGAACAAGCATGTGAAGTTTGTGGCAGACGGTTCAGGAGAATACA…	784	1	AT1G65980.1	TPX1 (THIOREDOXIN-DEPENDENT PEROXIDASE 1); antioxidant	thioredoxin-dependent peroxidase	Identical to Peroxiredoxin-2B (PRXIIB) [Arabidopsis Thaliana] (GB:Q9XEX2); similar to TPX2 (THIOREDOXIN-DEPENDENT PEROXIDASE 2), antioxidant [Arabidopsis thaliana] (TAIR:AT1G65970.1); similar to type 2 peroxiredoxin [Brassica rapa subsp. pekinensis] (GB:	95.68	162	7	0	75	560	1	162	1e-75	279
MMN1.Contig_1464	GGGAAACAATTGGCGCCAAGAAGCATTTCTTCTTTTTAACTCGTACGGCTTCTCTGATCTGATGTATTGTTGTTTCGACGAAAGAGTAAAACGAGAAGGTTGAGAATGGAGAACGATGGGGGATGTAGTAGCGAGAGAAGTCTTTACGAGGTACTTGGAGTGGGAGCAACAGCGACTCAGCAGGAGATAAGGAAAGCTTACCATAAGTTGGCTTTGAGGCTTCATCCTGACAAAAACAAGGACGACCAGGAAGCTAAAGAGAAATTTCAGCAGCTGCAAAAGGTGATTTCGATTCTCGGTGATGAAGAGAAAAGGGCTGTCTATGATCAAACTGGCTCCGTCGACGATGCTGATCTCTCGGGAGATGTGGTTGACAACTTGAGGGACTTCTTCAAGGCA…	767	1	AT3G12170.1	DNAJ heat shock N-terminal domain-containing protein		similar to ATJ6 (ARABIDOPSIS J-DOMAIN PROTEIN 6), heat shock protein binding / unfolded protein binding [Arabidopsis thaliana] (TAIR:AT5G06910.1); similar to unnamed protein product [Vitis vinifera] (GB:CAO23538.1); contains InterPro domain Heat shock pro	88.18	220	26	1	106	765	1	219	9e-108	386
MMN1.Contig_1465	GACATGCTCGGACTCGAGACCTTCCCTGGTGTGAAGCGTATCACCATCAAGCCCCAAACCGACAGGTGGGTCTTCCCAGACACCAAGTCCGGAATCATTGTTTTGGCTGAGGGTCGTCTCATGAACTTGGGTTGTGCCACTGGTCACCCTAGTTTCGTCATGTCTTGCTCTTTCACCAACCAGGTGATTGCCCAGCTTGAGCTTTGGAACGAGAAGTCGAGCGGCAAGTACGAGAAGAAGGTGTACGTTCTACCCAAGCATTTGGACGAGAAGGTTGCAGCTCTTCACTTGGGAAAGCTTGGAGCTAAGCTCACCAAGTTGACAAAGGACCAATCTGACTACGTCAGCATTCCCATTGAAGGACCATACAAGCCTGCTCACTACAGGTACTGAGAGAAG…	783	1	AT3G23810.1	SAHH2 (S-ADENOSYL-L-HOMOCYSTEINE (SAH) HYDROLASE 2); adenosylhomocysteinase		Identical to Adenosylhomocysteinase 2 (SAHH2) [Arabidopsis Thaliana] (GB:Q9LK36;GB:Q8LPS8;GB:Q944K5;GB:Q949Z9); similar to HOG1 (HOMOLOGY-DEPENDENT GENE SILENCING 1), adenosylhomocysteinase [Arabidopsis thaliana] (TAIR:AT4G13940.1); similar to HOG1 (HOMO	96.15	130	5	0	1	390	356	485	2e-58	222
MMN1.Contig_1466	GGAAGAAGAGGAGAAGCAGTAGGCTGTTCAAGAAGAAGAAGAAATAGTTCGATGGCGATGACATTAGCAACTTCGGCCTCTGTGGTAGTGATGATTCCACGTGTCTCCACCGTCTCTTACCTTCCTCCGCTGCCTCCTCGCTCTTTTGGTCGATCATCTTTCACTGTTCCTCTGAAGCTAGTTTCAGGGAATGGTTTGCAGAAGGTTGAATTGATGAAGACGAGAGCTTCTTCATCAAACGAGACCTCAGCGTCCATTGACACCAACGAACTCTTTAATGACTTGAAGGAAAAGTGGGATGGTCTTGAGAACAAGACGACTGTGGTTATCTACGGAGGAGGAGCCATTGATGCTGTTTGGTTATCTTCCATTCTTGTTGGTGCCATCAACTCTGTTCCT…	717	1	AT4G01150.1			Identical to Uncharacterized protein At4g01150, chloroplast precursor [Arabidopsis Thaliana] (GB:O04616;GB:Q38835); similar to unknown protein [Arabidopsis thaliana] (TAIR:AT4G38100.1); similar to unknown [Populus trichocarpa] (GB:ABK95729.1)	82.05	156	24	2	82	537	11	164	5e-65	244
MMN1.Contig_1467	TCAGCGTTCTCAGGGAAACCAGTTGTTGGGAAGACTAAAATCCGCACAGAAGGTGGCAAAGGAAGTATCACGATCATGAGGACGAGAGGCTAAACTTTAAGATTTAAAGAAAATCTAAACTTTTTTGCCTTATTCTCATAGGCCCTTCGATAGTCAAAAAGGGTCTTTAATCAAAGTACAGCGGCTAATATTATGAATCAAGTTCTTGTTTTCATTTTGGTTAGGATATTTTTTGGTTTGTATAAAAAGTCTCTTTGTTCTTAAATGTTGTTGGAAACTTTTAATATCCAAAACTTTGTTCATGTATGTCTCTGAACTCTCTGATCTTTTCAACCTTATGTACATAAATTCGTCATTG	358	1	no significant hit
MMN1.Contig_1468	GTGTGTATTACCGAAGGAATCCCTCAACATGACATGGTACGTGTAAAGCATGCTCTTAACAGTCAGTCAAAAACTAGGCTGATTGGTCCAAACTGCCCTGGGATTATCAAGCCTGGTGAATGCAAGATTGGAATTATGCCGGGGTACATCCATAAGCCTGGCAAGATTGGGATTGTCTCTCGTTCTGGAACCTTGACCTATGAAGCTGTTTTCCAAACAACTGCAGTTGGTCTAGGCCAATCTACTTGTGTAGGAATTGGTGGAGATCCTTTTAACGGGACCAACTTTGTCGACTGCTTGGAGAAGTTCTTTGTTGATCCTCAAACAGAAGGTATCGTTCTCATTGGAGAAATCGGAGGCACTGCAGAAGAAGATGCTGCAGCTTTGATAAAGGCAAGT…	810	1	AT5G08300.1	succinyl-CoA ligase (GDP-forming) alpha-chain, mitochondrial, putative / succinyl-CoA synthetase, alpha chain, putative / SCS-alpha, putative		Identical to Succinyl-CoA ligase [GDP-forming] subunit alpha-1, mitochondrial precursor [Arabidopsis Thaliana] (GB:P68209;GB:O82661;GB:P53586); similar to succinyl-CoA ligase (GDP-forming) alpha-chain, mitochondrial, putative / succinyl-CoA synthetase, a	98.54	205	3	0	1	615	143	347	8e-115	409
MMN1.Contig_1469	GAATTCGATCAAAGAAATGCAAACACCATCTGTTCCTCCTGGAAGAAGTCTCTACCTCATCCTCATCATCGTCTTAGCGCTCTTTGCATCGATCACCATGGCTGAATCAACGGGAGAAGCATCGTCGGAAGCGAAGGTCCACATCATCTACACCGAGAAGCCCACCGATGAGGAACCTAAAGACTATCATCTCCGTACTCTCTCCTCCGCTCTCGGCAGTGAGGAAGCAGCAAAGGACGCTCTGATCTACAGTTACAAGGAAGCTGCTTCTGGTTTCTCAGCTAAGCTCACACCTGAGCAAGTCACCGAGATCTCCAAGCAACCAGGTGTGATTCAAGTTGTGCCGAGCCAGACCTACCATTTGCACAAACCTGTTGGTGCTGGTTTCAAGCTCACCTA…	537	1	AT1G71950.1	identical protein binding / subtilase		similar to subtilase family protein [Arabidopsis thaliana] (TAIR:AT1G32950.1); similar to unnamed protein product [Vitis vinifera] (GB:CAO49929.1); similar to hypothetical protein [Vitis vinifera] (GB:CAN68260.1); contains InterPro domain Proteinase inhib	79.37	126	16	3	38	385	6	131	5e-46	180
MMN1.Contig_147	GACTGGTCATAGAAACGAAATGGAAGAAAGTAAAAGAAACTTATTGGATGAAGAAGCTAAAGCTTCTCTAGACATTTGGAGATATGTCTTTGGCTTTGCAGATATAGCAGCTGCAAAGTGTGCCATCGATCTTAAGATACCAGAAGCCATTGAAAACCATCCGTCACAGCCAGTGACACTAGCCGAACTCTCCGGTGCAGTCTCTGCCTCTCCATCGCATCTCCACCGTATAATGAGATTTCTTGTGCACCAAGGAGTCTTTAAAGAAGTCCCCACAAAAGATGGTCTAGCCACAGGCTACACTAACACGCCACTCTCTCGCCGTATGATGATCACAAAATGTGACGGCAAGTCTCTGGCTCCTTTCGTTCTCTTCGAAACAAGTCCCCAACTACTAGC…	1345	6	AT4G35160.1	O-methyltransferase family 2 protein		similar to O-methyltransferase family 2 protein [Arabidopsis thaliana] (TAIR:AT4G35150.1); similar to unnamed protein product [Vitis vinifera] (GB:CAO47448.1); contains InterPro domain O-methyltransferase, COMT, eukaryota (InterPro:IPR016461); contains In	83.78	370	59	1	11	1117	12	381	0	641
MMN1.Contig_1470	GGTCAAGGAAGTTTTTCTGATGGTATGCCTCTAGGAATCTCTGGTACTTTCAACTTTATGATTGTATTCCAGGCTGAGCACAACATTCTTATGCACCCATTTCACATGTTAGGTGTAGCTGGTGTATTCGGCGGCTCCCTATTTAGTGCTATGCATGGTTCTTTGGTAACTTCTAGTTTGATCAGGGAAACCACAGAAAATGAATCTGCTAATGAAGGTTACAGATTCGGGCAA	234	1	ATCG00020.1		Encodes chlorophyll binding protein D1, a part of the photosystem II reaction center core	Identical to Photosystem Q (psbA) [Arabidopsis Thaliana] (GB:P83755;GB:Q33592); similar to photosystem II protein D1 [Buxus microphylla] (GB:YP_001294164.1); similar to photosystem II protein D1 [Nicotiana tabacum] (GB:NP_054477.1); similar to photosystem	100	78	0	0	1	234	164	241	1e-40	160
MMN1.Contig_1471	GAACACTTTGAGTCTTGAAGAAAGGTCATCATCATCAACGTCGAGAATAATGGCTTCTCTTTGTGCCTCCTCTGCCATCGCCGCCATTTCTTCTCCTAGTTTCTTGTGTGGCAAGAAGCTAAGGCTGAACAAGAAGCTGAGTGTTGCAGCTGTTTCCAAATCAGCTGCGTCTGTGCGGGCCGTTGCAGCGGATCCCGAGAGACCAATCTGGTTCCCTGGAAGCACTCCTCCAGAGTGGCTCGACGGTAGCCTCCCTGGTGACTTCGGATTTGATCCTCTTGGTCTTTCATCTGACCCGGATAGTCTAAAATGGAACGTACAAGCCGAGATAGTTCACTGCCGGTGGGCAATGCTAGGTGCCGCCGGAATTTTTATCCCGGAGTTTCTAACCAAGATCGG…	775	1	AT3G61470.1	LHCA2 (Photosystem I light harvesting complex gene 2); chlorophyll binding	Encodes a component of the light harvesting antenna complex of photosystem I.	similar to LHCA6 (Photosystem I light harvesting complex gene 6), chlorophyll binding [Arabidopsis thaliana] (TAIR:AT1G19150.1); similar to LhCa2 protein [Brassica juncea] (GB:ABO71660.2); contains InterPro domain Chlorophyll A-B binding protein; (InterPr	67.15	207	68	1	101	721	19	222	4e-63	238
MMN1.Contig_1472	ATTGGAGACCGGTATCTCAAGGAGTGGGTAATAGCTGAACCGGAAACAAAAACATTACGGATTAAACCGGAATTTGAGTTCTTGATCTTAGCATCTGACGGCCTTTGGGATAAGGTAACGAACCAGGAGGCGGTTGATGTGGTTCGACCGTACTGCGTAGATGTGGAGAATCCAAAGACACTCTCTGCTTGCCAGAAACTAGTCGAGCTATCCTGTAAGAGAGGGTCCTTGGATGATATTAGTCTAATCATAATTCAGCTACAAAAGTTTGTGACATGATTCATTAAACATCTAGTATTAAGCTAAACTTGATTAAATTCGTTAGGTCTTAAGTTATTGAAAATTTTTGTCGGTATTTACATGTAAATATATTTTAAACATTATTAACTAATATTATTA…	401	1	AT2G40180.1	ATHPP2C5; protein serine/threonine phosphatase		similar to protein phosphatase 2C, putative / PP2C, putative [Arabidopsis thaliana] (TAIR:AT2G30020.1); similar to unnamed protein product [Vitis vinifera] (GB:CAO21431.1); contains InterPro domain Protein phosphatase 2C-related; (InterPro:IPR001932); con	92	75	6	0	1	225	299	373	2e-35	144
MMN1.Contig_1473	ACAATCAAACACAAACAAAACCCAAAGAAGATCTAAGTTCATCATGTCTACGACCGGACAAATCATTCGATGCAAAGCTGCCGTTTGCTGGGAAGCTGGAAAGCCACTAGTGATGGAGGAAGTGGAGGTTGCTCCACCGCAGAAGCATGAAGTTCGTATCAAGATTCTCTTCACTTCTCTCTGTCACACTGATGTTTACTTCTGGGAAGCTAAGGGACAAACGCCTTTGTTTCCACGTATCTTCGGACATGAAGCTGGAGGTATTGTGGAGAGTGTTGGAGAAGGAGTGACTGATCTTCAACCAGGAGACCACGTTCTCCCCATCTTCACCGGAGAATGCGGAGACTGCCCTCACTGCCACTCGGAGGAGTCCAACATGTGCGACCTTCTCAGGATCAA…	807	1	AT1G77120.1	ADH1 (ALCOHOL DEHYDROGENASE 1)	Catalyzes the reduction of acetaldehyde using NADH as reductant. Requires zinc for activity. Dimer. Anaerobic response polypeptide (ANP). Fermentation. The protein undergoes thiolation following treatment with the oxidant tert-butylhydroperoxide.	Identical to Alcohol dehydrogenase class-P (ADH1) [Arabidopsis Thaliana] (GB:Q9CAZ2;GB:Q9CAZ3); similar to ADH2 (ALCOHOL DEHYDROGENASE 2), formaldehyde dehydrogenase (glutathione) [Arabidopsis thaliana] (TAIR:AT5G43940.1); similar to alcohol dehydrogenas	93.95	248	15	0	44	787	1	248	3e-120	427
MMN1.Contig_1474	GTTTATACCACCATTAACGATCCCACCAGAGGAGATTCTCATTCTACTCCACTTACCGTTGCCGTTAAGATACTCAAACAATTAAGTCAACAGGTATGTATAGCATTAGTTATGCAAATGATAGCATTCGAACTTTGTCCAAGAATGTTACCAAAAAGAAAACTTTGTCAAAGAAAAAAACGTTAGACCATCAATATTATTGATCCTCTGTTTGTAGTAAAAGAGGCACAAGCAATGGATAGCAGCGGTTCAGTTATTGCTCGTAGTTAATCATTCAAACATAGTGAGGCTCTTAGGATATTTCTCAGAGGACACATAGAAGATTTTGATTTACAATTTGCTGTCCAATGTCAGTTTAGAGGATCATCTCTTAACTCGAAGAACCTCAACTTTGTCGTG…	794	1	AT4G17660.1	protein kinase, putative		similar to protein kinase, putative [Arabidopsis thaliana] (TAIR:AT5G47070.1); similar to kinase domain containing protein [Brassica oleracea] (GB:ABD65075.1); contains InterPro domain Serine/threonine protein kinase; (InterPro:IPR002290); contains InterP	74.07	27	7	0	676	756	280	306	4e-31	40.4
MMN1.Contig_1475	GAATCTCTGTCTCTCTCTCTCTCTCTTCTGGTAGTCTTCGATTACGAAAAGTTCATCTCTTTTCAGAGATACGATGTCGACACCAGCGAGGAAGAGGCTGATGAGGGATTTCAGGAGGTTGCAGCAAGATCCTCCTGCTGGTATCAGTGGTGCTCCTCAGGACAACAACATCTTGCTCTGGAACGCTGTTATCTTCGGTCCAGATGATACTCCTTGGGATGGAGGTACTTTTAAGTTGACTCTTCAATTTACGGAGGATTATCCCAACAAACCACCTACTGTTCGTTTTGTTTCTCGCATGTTTCACCCAAACATCTATGCAGATGGGAGTATCTGTCTTGATATCTTACAGAACCAATGGAGTCCCATTTATGATGTTGCTGCGATTCTCACATCTAT…	758	1	AT1G14400.2	UBC1 (UBIQUITIN CARRIER PROTEIN 1); ubiquitin-protein ligase	ubiquitin carrier protein	Identical to Ubiquitin-conjugating enzyme E2-17 kDa 1 (UBC1) [Arabidopsis Thaliana] (GB:P25865); similar to ATUBC2 (UBIQUITING-CONJUGATING ENZYME 2), ubiquitin-protein ligase [Arabidopsis thaliana] (TAIR:AT2G02760.1); similar to ubiquitin carrier-like pr	94.08	152	9	0	74	529	1	152	1e-84	309
MMN1.Contig_1476	TTAAATTGGAAATTTATATGAAATAAATAAAATAAAACGCTCGTCGTCGTCGTCTTCCTCCGCACTCCGGTGATCGAACACCACGAAGAAGTAATCCCAAGGAGAAAAAAAAGGCTTAGAGATGCATTCATTTGGATACAGAGCAAATGCTCTGCTCACGTTCTCCGTCACGGCGCTGGCTTTCATCTGCGCAATCGCGTCCTTCTCTGACAAATTCAGCAACCAGAATCCCTCTGCTGAGATCCAGATACTTAACATCAATCGTCTTAAGAAGCAGTCTTATGGCAATGATGAGGTCAGCTTGACATTGGACATATCGGCAGACTTGCAGTCACTGTTTACTTGGAACACCAAACAGGTTTTCGCTTTCGTGGCAGCGGAATACGAATCCCCAATGAA…	770	1	AT3G05230.1	signal peptidase subunit family protein		Identical to Signal peptidase complex subunit 3A [Arabidopsis Thaliana] (GB:Q9MA96;GB:O65203;GB:Q0WTA7); similar to signal peptidase subunit family protein [Arabidopsis thaliana] (TAIR:AT5G27430.1); similar to Signal peptidase 22 kDa subunit [Medicago tr	91.02	167	15	0	122	622	1	167	4e-86	314
[truncated: 1,279 more rows]

## Sheet: Assembly info
Raw Sequence ID	EST CLONE ID	Genbank Accession	dbEST ID	MMN1 trimmed seqs	MMN1 Contig ID
Q1_Carter_MNA_01_A01_001.F_3073.ab1	MMN1_1	GR722560	66466035	GCTCACCGCTGGATTCACTGAGGAAGACGCCAAGAACTCCAAGTTCGTCCAGCAACACAGGCGGTGATCTACTCAAGTGAACTCTATTGCTGAGAGTGCTTTCAGACTTTATTATTCTAATAAACATAAAAGAGAGAATCCTACTTACATCTTGTTGATCTCTCGTTTCCTTTCATCTTTTGTCTTTTCACAACTCTCGAAACAGTGTTAAGTTTGAAATGGTTTGATTCCAATCTTTTCCCCCTTATGTTTGAAATGGATTGGCTCTATTTTTGTTATGTTGAATCGAATATAGATGGCTGACCATCATTAGTGAC	MMN1.Contig_221
[truncated: 2,825 more rows]
