# Supplementary material for: Identification of Differential Gene Expression in Brassica rapa Nectaries through Expressed Sequence Tag Analysis
Source: PLoS One. 2010 Jan 20;5(1):e8782. doi: 10.1371/journal.pone.0008782 (PMC2808342; doi:10.1371/journal.pone.0008782)
Supplement: Table S3 — MLN-2 EST and contig sequences with blastx results. The first tab contains MLN-2 contig sequences and blastx results for each contig. The second tab contains all MLN-2 trimmed ESTs, GenBank and dbEST accession numbers, and also indicates which ESTs formed which contigs. (4.97 MB XLS) [file pone.0008782.s003.xls]

## Sheet: MLN2 contigs and blastx results
Contig ID	Consensus contig sequence	Contig Length	No. of ESTs in contig	Top Arabidopsis protein hit (blastx)	Short_description	Curator summary	Description	% identity	alignment length	mismatches	gap openings	query start	query end	subject start	subject end	e-value	bit score
MLN2.Contig_1	AGTGGTATCAACGCAGAGTGCCATTACGGCCGGGGAAGCTAGATGGAGATGCAGCTATGAACAAGTTTTTCAGCGATATATACCAGAGTGCTGATGAGGACATGAGGCGAGCCATGAACAAATCATTTGCCGAGTCAAATGGGACAGTGCTGTCTACAAACTGGAAAGAGGTTGGAACTAAGAAAGTGGAGAGCACTCCACCAGATGGTATGGAGCTCAAGAAATGGGAGTATTAATGATCTTTTTAAATCCTTTTATCTGGTCTTGTTAAAAATCTCTGACAAATCTTTAAAGTTTCCTTTGGGTTTTCAAGTTCATTCGTCGTGGTCTGAGAAAACGTTATAATAGTGTACTAGAAAACATCTCAAGTTTGTGCTTTGTACTTTTTCTTCTCATTGT…	493	1	AT4G11260.1	SGT1B (enhanced downy mildew 1b); protein binding	Functions in plant disease resistance signaling, SCF(TIR1) mediated degradation of Aux/IAA proteins and HSP90 mediated degradation of R resistance proteins. AtSGT1a and AtSGT1b are functionally redundant in the resistance to pathogenes. AtSGT1b was more	similar to SGT1A (Suppressor of G2 (Two) 1A) [Arabidopsis thaliana] (TAIR:AT4G23570.2); similar to SGT1A (Suppressor of G2 (Two) 1A), protein binding [Arabidopsis thaliana] (TAIR:AT4G23570.1); similar to SGT1-like protein [Brassica oleracea] (GB:CAF06580.	98.48	66	1	0	36	233	293	358	4e-33	137
MLN2.Contig_10	GATTACAGAACAGAAGAGAAAAAACGAAACAGTTGTTTATTTGTCACGACAGATCGATTCCCACTTTCCCAAATCTTTCTTCCAACACACAGATTCTCCTCTCTCGGCACTCAGATATGAGTAGCCTCATCGCTTCATCCGCCACCGTTCTCCCTCCGTGCGGCCCCACGGCGCTCAAATCTTGCATCTCCCCACCTCTCGCCTCCCAATCCCGAACCAAACGCGCGAGCTCGAGAAGAGCTTCAACCATGACGGTTCGATGCGACGTAGCTACCAAAACAGCTGATTCGGTGAACGCTGAGGAGACCGAGCTGTCGGAAGAAGAAATGGAAGCGAAGGCGAAGGTTGGATCTTCGATCAGRGTGACTGCGCCGTTGAAGGTTTACCATGTGAACCGCG…	701	2	AT5G23440.1	FTRA1 (ferredoxin/thioredoxin reductase subunit A (variable subunit) 1); ferredoxin:thioredoxin reductase		similar to FTRA2 (ferredoxin/thioredoxin reductase subunit A (variable subunit) 2), ferredoxin:thioredoxin reductase [Arabidopsis thaliana] (TAIR:AT5G08410.1); similar to lipoic acid synthase-like protein [Brassica rapa] (GB:ABV89629.1); contains InterPro	58.19	177	65	3	75	578	7	181	4e-44	174
MLN2.Contig_100	TATCCCATGGGGTGAGGCTGGTGCTGACTTTGTTGTGGAGTCTACTGGTGTTTTCACTGACAAGGACAAGGCCGCTGCTCACTTGAAGGGTGGTGCCAAGAAAGTTGTGATCTCTGCCCCAAGCAAAGATGCTCCCATGTTTGTCGTTGGTGTCAATGAGCATGAATACAAGTCTGATCTTAACATTGTTTCCAACGCTAGTTGCACCACTAACTGCCTTGCTCCACTTGCCAAGGTTATCAACGACAGGTTTGGAATTGTTGAGGGACTCATGACCACCGTCCACTCTATCACTGCTACTCAGAAGACWGTTGATGGTCCATCAATGAAGGACTGGAGAGGTGGAAGAGCCGCTTCCTTCAACATCATTCCCAGCAGCACCGGAGCTGCCAAGGCTGT…	945	7	AT1G13440.1	GAPC-2; glyceraldehyde-3-phosphate dehydrogenase		Identical to Glyceraldehyde-3-phosphate dehydrogenase, cytosolic (GAPC) [Arabidopsis Thaliana] (GB:P25858;GB:Q42352;GB:Q9M8W8); similar to GAPC (GLYCERALDEHYDE-3-PHOSPHATE DEHYDROGENASE C SUBUNIT), glyceraldehyde-3-phosphate dehydrogenase [Arabidopsis th	97.6	250	6	0	2	751	89	338	2e-127	451
MLN2.Contig_1000	GACGGAGTTCAAGGTCCTCGAAACCTTGACCACCACCACCCCGACGCTCTGCTCCAACAACTGCGGCGTTACAGCGAATCCAGCGACCAACAACATGTGTCAGAAATGTTTCAACGCCTCCGCCGCCGCCGCCGGCGTAGACTCAACCTCGATCTTGAAGATCAGCCAGATCCGTCAACCTCCGATCGACGCCAGCCAAAGTCGTGATTCGTCCCAGGGAGATCGACCGGGTTAAGAGAGACCAACAGACGATAAACCGATGTTCCGGCTGTCGGAAGAAGGTCGGTTTGACCGGGTTCAGATGCCGGTGCGGCGACCTTTTCTGCGCCGAGCACCGTTACTCGGATCGCCACGAGTGCAGCTACGACTACAAAACCGCCGGACGCGAGGCGATCGCTA…	532	1	AT3G12630.1	zinc finger (AN1-like) family protein		Identical to Zinc finger A20 and AN1 domain-containing stress-associated protein 5 (SAP5) [Arabidopsis Thaliana] (GB:Q9LHJ8); similar to zinc finger (AN1-like) family protein [Arabidopsis thaliana] (TAIR:AT1G51200.2); similar to zinc finger (AN1-like) fa	90.59	85	7	1	159	410	66	150	4e-41	164
MLN2.Contig_1001	GTGTGGGGTTTGCAAAGGAGTCACATTGCAACTGCAGTCAGTAGTGATCAGATCAGACTTCATTGTTTTGGATCCAGGGGGAGCAGATGTGGTTTTGGGTATCCAGTGGCTCCGTACTTTAGGGAAGTGTGAGGTTGACTGGGAAAATCAAGAGCTATCGTTTGTGACTTCAAAAGGCAGAGTCACCTTAGTTGGAGATCGAGCTTTACATTCGAAGACATCATCGTTAGAGTCTATATCAACTGGATTCGAGTTACATGAGTTGGGTACTATAAATTCAGAAGTGGGGCCAATAACTCTCGACATGCC	309	1	AT3G29750.1	ATP binding / aminoacyl-tRNA ligase/ aspartic-type endopeptidase/ nucleotide binding		similar to ATP binding / aminoacyl-tRNA ligase/ nucleotide binding [Arabidopsis thaliana] (TAIR:AT3G30770.1); similar to RNA-directed DNA polymerase (Reverse transcriptase); Chromo; Zinc finger, CCHC-type; Peptidase aspartic, active site; Polynucleotidyl	35.37	82	51	2	5	244	180	255	1e-08	54.7
MLN2.Contig_1002	GGTTGGAGTTATGGGGTTCAAGTGCAAGTGCGGTAGCACGTTTTGCGGGAGCCATAGGTACCCGGAGAAGCATGACTGTAGCTTCGATTTCAAAGAGGTTGGACGCGGTGCAATCGCAAAGGCGAATCCTGTGGTCAAGGCCGATAAAGTCCTGAGGATTTGATGTGATGTGATCTGTCTATCTTTCAGTTTATTCGGAGAATGTTGATGTGATGTGGTCATGTTCCATGTTGGGTTTCTATGAATCAAAATGAAAATTGCTGCTATTGGTTTTCTCATGAATCCTTTTTAGTGCTTTTTAAGTCTATTGAAATGGAGTCTCTCTTTGCTTCTCAAGATTTGCTTCTTGGCTATGTTTTTATTCGCAGCTTGATATAGATGAGTTAAGAGATTACTGCC…	509	1	AT4G12040.2	zinc finger (AN1-like) family protein		Identical to Zinc finger A20 and AN1 domain-containing stress-associated protein 7 (SAP7) [Arabidopsis Thaliana] (GB:Q9SZ69); similar to zinc finger (AN1-like) family protein [Arabidopsis thaliana] (TAIR:AT4G22820.1); similar to zinc finger (AN1-like) fa	92.45	53	4	0	2	160	123	175	1e-24	108
MLN2.Contig_1003	GGCCGATCTTTTTCTCCCAACAGATTTTCATCTTTTTTACTCCGGTAATATGGGAGATTACTCAATCCAGATCACGCCGAAGCTGATCAATCAGTTAGCTCAAGGCAACGAAAAACCGAAGAGAAAGGCGAAGAGAACCAAACCCAAAGTCTCACCTCCACAGAACAATGCGGATCAAGCGAGATCACACCGTGATGCAGCAGAGAAACCGAAGCCAGTGGCAGAGTTACCGACCCAGACCCCACCATTCTTCTTCCCAATTCCGCAACAAGGAGCAGCAAACACGGAGCTGGAATCGATCAAATCCGTGTTGAAAGAGAGCGAGAAGGTTCTTGAGAAGGTGGAGAGACGAGAAAAGAACATTGTCGGTGAAGTGACAGAGAGGGCTAAAGATCTGAG…	472	1	AT4G12340.1			similar to unnamed protein product [Vitis vinifera] (GB:CAO70310.1); contains InterPro domain CHCH (InterPro:IPR010625)	72.34	141	39	2	50	472	1	136	1e-28	122
MLN2.Contig_1004	CGGCTGAAGAAACGCTTAGGCTTGGGAGTTACAATGCTTTGCTCAAGACCTCTTTGCCTGGAGAGTTTCAGTACTATAAACCAGAAGAAGAAAGCTTTGAGTCATCACATGACGCCTTTAGATCTGCTTTACCACGTGGGTTTGCTTTTGAGATACTTTCTGTGTACTCAGGGCCGCCTAATATAGCCTTCAAGTTTAGACACTGGGGATACTTTGAAGGAGATTTCAAAGGCCATGCTCCTACTGGGGAAATGGTTCAGTTCCTAGGCCTAGGAGTTCTAAAGGTTGATGAGCTGCTTAGAGCAGAGGAGATTGAGATTTACTATGATCCAGGAGAGCTGTTCGGGGGACTGCTCAAGGGACCTCCTGTATTAGAGACCAAAACCACAGACACTGGAG…	575	1	AT1G78780.4	pathogenesis-related family protein		similar to hypothetical protein [Vitis vinifera] (GB:CAN63863.1); contains domain SSF54427 (SSF54427)	92.41	145	11	0	3	437	91	235	2e-75	278
MLN2.Contig_1005	GTCATGAGTGAGATCGTATGCTTATGTTACAGAAAGTAATCAGATGAACGTTCAAGAATAACTGGAGAGTCAGAGGAAAAGACTTCATCTTGAAGATGATCAAGATCCTTACCTCAGTGGCAAGACAGAGTTGAGGACATTTGGCTTCTCCACACCTGCCACTACAAGGCATGTAACCAGCGCAGCAAGTGTACCTGTGAGACAAAGAAGCATCCTTTTTTAAAAAAACTAAGAAGATCGAATTGCAATGCATCTATGCAAAGGCACTTGAATGCGTTGAATACCTAGACATGTCATTGTAAAGCGCACGCTTGCGAAGCAAGTATGACGCACAAGGGGCACTGCAAGGTGAAGAAGAACACAAACAGATAAAGAATCACACAGTGATGAAGTTTTATT…	535	1	AT5G19310.1	homeotic gene regulator, putative		similar to ATCHR12, ATP binding / DNA binding [Arabidopsis thaliana] (TAIR:AT3G06010.1); similar to unnamed protein product [Vitis vinifera] (GB:CAO71127.1); similar to PREDICTED: similar to SWI/SNF-related matrix-associated actin-dependent regulator of c	29.63	54	34	1	309	458	188	241	1.5	29.3
MLN2.Contig_1006	TCCGGGAAAGGTCCGATCGACGTGTTCAAATCGAATCTCGGAGGTTGGGAGCAGGATCAGCTCGATGTTCGAGCTATCCTCGAGAAATACGGATTGAAATCAATCTTCGCTTTCAACGTCGACAAAGGTCGAGGCGTCCCGATCCGTTTTCAAAGGAATGGCCGGTCTGTGCTGACGTACAGAGATGGTGCCACCGTTTACATCGACGGCGAACCTCAGGATTCTATGATCCAACCGATCACAAGAATCGTGCTTGGAGTCGTGTTTGCTACGGCGTTAATAACGTTTCTAATGAAGGACCCGCCAGCGTGGATCAAGAACAACATCTCCATTGGAAACTTCCCTCCGTGGGTGCTCGCGTGCATAGTAATAGTATTCACCCGAGCGAGGAAGAGAACC…	563	1	AT1G71780.1			similar to unnamed protein product [Vitis vinifera] (GB:CAO67543.1)	84.51	142	21	1	4	426	56	197	1e-67	252
MLN2.Contig_1007	GATGATGCTCTTAATCTTATCATCCACCGCAAGAAGGAGAAGGCCATCCCCGTTTTAGACAGAGTCTACTGTCCCAAGCCTTCTTGGTAACTTTTTGATGTCCGACCGCGACCTCCCACTCGGCTTCTCCATTGATCCTCGCCAAAAGTCAGTAGCACGCACATGCGTCGAGTGCGGCTTGTGTTTCTGCAAAAAATGCCATGTTCCATGGCATTACAAGAAGACGTGCGATGAGTTCAAGAAGTCCCCGTCTTACCTGACATCTGACGCTGCGCTTTTTGAGTCGTTAGTCAAGACACAGGGATGGATCAAGTGTCCCCAGTGTGCCACCGTTGTTCAAAAAAATGGCGGGTGCCAACGCATTAGCTGCAGACATTGCAACCACAAGTTCTGTTACGC…	619	1	AT2G19610.2	zinc finger (C3HC4-type RING finger) family protein		similar to zinc finger (C3HC4-type RING finger) family protein [Arabidopsis thaliana] (TAIR:AT5G07640.1); similar to unnamed protein product [Vitis vinifera] (GB:CAO21795.1); contains InterPro domain Zinc finger, C6HC-type; (InterPro:IPR002867); contains	66.1	118	40	0	89	442	296	413	1e-55	186
MLN2.Contig_1008	TGGGGTTGAAGGAGCACTAGCTCTTCCCTCAAGTGGAAGGCATATTCCGAGGCGGTGCGTCTCTAAGCCCCGCCGTGATCGGAGAACTGATGATCGCCAACAGAAACTCGCCGAGCCGTGCGCTTAAATCGGTGATCAACGCGTTGCAAACGGACGGGGATCGGAGGGGAACTCCGGCGAGTACGAGACGGTTGTTTCACGAAAGAGCGTCGTCGGAAGATTACGAAGGAGATACGAATGGGCCTTTATGCGGCGGAGGAAGTTCGCCGGCGGTGAAGGAGTTCAAGAAGTTGTATGGACTATTGAGGTTGAAAAGCAACAGGAAATCTCAGTCGTTCAATCTGACTCGGGAGCTAAGGAACGGTTCGTGATCTGAAACTTTAAAAGCCAACTGCCAAG…	505	1	AT2G46620.1	AAA-type ATPase family protein		similar to AAA-type ATPase family protein [Arabidopsis thaliana] (TAIR:AT3G28580.1); similar to unnamed protein product [Vitis vinifera] (GB:CAO24289.1); contains InterPro domain AAA+ ATPase, core; (InterPro:IPR003593); contains InterPro domain AAA ATPase	70.08	127	32	3	3	365	368	491	2e-40	161
MLN2.Contig_1009	ACTACCAACTGTCTCTTTCCATTCGTCAAGGTTCTTGACCAGAAGTTCGGGATCATAAAGGGTACAATGACAACCACTCACTCATACACTGGTGACCAGAGGCTGGCTAGATGCTAGCCACCGTGATCTAAGGAGAGCAAGAGCAGCGGCTTTGAACATCGTTCCAACATCTACCGGAGCAGCTAAGGCCGTGGCGCTAGTGCTCCCTAACCTCAAAGGGAAACTCAACGGAATCGCGTTGCGTGTGCCAACTCCCAACGTCTCGGTGGTTGACTTAGTTGTGCAAGTCTCAAAGAAGACTTTTGCTGAAGAGGTCAACGCTGCTTTCAGGGATGCAGCTGAGAAAGAGCTTAAAGGTATACTCGATGTCTGCGATGAGCCTCTTGTCTCTGTTGACTT…	536	1	AT1G12900.1	GAPA-2; glyceraldehyde-3-phosphate dehydrogenase		similar to GAPA (GLYCERALDEHYDE 3-PHOSPHATE DEHYDROGENASE A SUBUNIT), glyceraldehyde-3-phosphate dehydrogenase [Arabidopsis thaliana] (TAIR:AT3G26650.1); similar to hypothetical protein [Vitis vinifera] (GB:CAN78872.1); contains InterPro domain Glyceralde	100	143	0	0	107	535	252	394	6e-78	234
MLN2.Contig_101	GGAGCTCCTCTGAGGAAGTCTCTGTTCTTGATGGTCACTTTACTAAGCTGGGTTTGGACAGCGTTGCCTACTTGATGGGTAAYGATGAYGAGACTAAGAAATGGCATGTCTAYGCTGCCTCCTCTKCCCAGTCCTCYAGCAACAAYAATGTYTACACGCTYGAGATGTGCATGACTGGTCTAGACAGGGAGAAAGCCTCTGTCTTCTACAAGAAYGGCGAGRCKGGWWCAATGRCYGACAACTCYGGAATCAGAAAGATCCTYCCTMAGTCCCAKATCTGCGACTTTGAGTTCGAGCCSTGYGGCTACTCTATGAACTCCATCGAAGGAGATGCRATCTCCACTATCCAYGTGACCCCTGAGGATGGGTTYAGCTACGCKAGCTTYGAAGCTGTGGGTT…	659	2	no significant hit
MLN2.Contig_1010	AACGAAGAAGGACACGTCTGAGCCTATCTGGGGGAAGAAAACACACCGAGCTAATAATAGCGAGTCAGACGAGTTGACTCACGGCTCCGTAGTGGGCTTCGACGTGGCCGAGCTGGACCCGGAGAACTCGCTGTCCGGGTTCATGGACCACGTCCCGGTAGCCTTGCGAGATGGGCCTGTTACCCAATGCTCCTCGGAAGACTCAGACGCAGCTTCAAGCACGTGATGCTCGTTGACGCGAAGATATCGTTAATCCTCGGTGACCCGTTAACCCGGGTTCGTAACCGGAGCCCCGAGTCAGTCCTCTTCTTCTCGGCCTCTAAACACAGCAGTAACAAGATTAACCCGGCGGTTATCATCGGTGGAGCGAAAGGGATCAGGAGGTTGTCGAGCGCCATG…	551	1	AT3G57400.1			similar to unknown protein [Arabidopsis thaliana] (TAIR:AT5G52500.1); similar to unnamed protein product [Vitis vinifera] (GB:CAO23601.1)	69.7	66	10	2	2	169	221	286	1e-68	90.1
MLN2.Contig_1011	AATAGTGGCCTTATTAAGGTTGATCGTGTCCTGTACTCATCAATTGTGTACCCACACAACTACGGCTTCATTCCTCGAACCATTTGTGAAGACAGTGATCCTATAGATGTCCTGGTACTCGTGCAGGAGCCTGTGCTAACTGGATCGTTCCTCCGTGCCCGTGCTATTGGACTAATGCCCATGATTGATCTGGGTGAAAAAGACGACAAGATCATCGCAGTGTGTGCTGATGATCCCGAGTTCCGTCATTACAGAGACATCAAAGAGCTTCCTCCCCACCGTCTAGCTGAAATTCGCCGCTTCTTCGAGGATTACAAGAAGAACGAGAACAAGAAAGTGGACGTTGAAGGTTTCCTCCCCGCTCAAGCTGCCATAGACGCGATTAAAGACTCCATGGAT…	587	1	AT2G18230.1	ATPPA2 (ARABIDOPSIS THALIANA PYROPHOSPHORYLASE 2); inorganic diphosphatase/ pyrophosphatase	Encodes a protein that might have inorganic pyrophosphatase activity.	Identical to Soluble inorganic pyrophosphatase 2 (PPA2) [Arabidopsis Thaliana] (GB:P21216;GB:Q8L988;GB:Q9ZPV6); similar to ATPPA4 (ARABIDOPSIS THALIANA PYROPHOSPHORYLASE 4), inorganic diphosphatase/ pyrophosphatase [Arabidopsis thaliana] (TAIR:AT3G53620.	97.24	145	4	0	1	435	74	218	5e-78	286
MLN2.Contig_1012	TGTCACTCTCTAAACTAGTCTGCAAAGCACAACAGACTCAAGAAGACGATACCTCCACCGTCTCTCGCCGTCTCGCTCTCACACTCCTCGTCGGCGCCGCTGCCGTTGGTTCCAAAGTGTCCCCCGCCGATGCTGCCTACGGTGAAGCTGCAAATGTGTTTGGGAAGCCAAAGACAAACACAGACTTCACTGCATACAGTGGAGATGGATTCCAAGTGCAGGTGCCAGCTAAGTGGAACCCAAGCAGAGAGGTAGAGTATCCAGGACAAGTCCTTAGGTACGAAGACAACTTTGACGCTACTAGCAATCTCAATGTCATGTCACTCCTACCGACAAGAAGTCCATCACTGATTACGGTTCTCCTGAAGAGTTCCTCTCTCAGGTCAACTATCTTCTAGG…	595	1	AT1G06680.2	PSBP-1 (OXYGEN-EVOLVING ENHANCER PROTEIN 2)	Encodes a 23 kD extrinsic protein that is part of photosystem II and participates in the regulation of oxygen evolution.	Identical to Oxygen-evolving enhancer protein 2-1, chloroplast precursor (PSBP1) [Arabidopsis Thaliana] (GB:Q42029); similar to PSBP-2 (photosystem II subunit P-2), calcium ion binding [Arabidopsis thaliana] (TAIR:AT2G30790.1); similar to Oxygen-evolving	95.65	92	4	0	320	595	96	187	2e-46	181
MLN2.Contig_1013	GGGTTGCTAACTCAACGGTAGAGTACTCGGCTTTTAAGTGCGACTAGCATCTTTTACACATTTGTATGAAGAAAAGGATTCGTCCAGATCCGCGGTAGAGTTTGTAAGACCACGACTGATCCTGAAAGGAATGAACGGAAAAAATAGCATGTCGTATCAAGGGAGAATTCAGATAAAAATTTTTTTTATTTTCTAATCGGTACAACCTTGTCGAAAAAAAAAAAAAAGAAGAATTCCAATTTGGGTCGAGTGAATAAATATAAATGGATGGATAAAAAACAAGTTTTCCTTATTCT	296	1	AT5G11510.1	MYB3R-4 (C-MYB-LIKE TRANSCRIPTION FACTOR 3R-4, myb domain protein 3R-4); DNA binding / transcription coactivator/ transcription factor	Arabidopsis thaliana putative c-myb-like transcription factor MYB3R-4	similar to PC-MYB1 (myb domain protein 3R1), DNA binding / transcription factor [Arabidopsis thaliana] (TAIR:AT4G32730.2); similar to Myb [Nicotiana tabacum] (GB:BAB70511.1); contains InterPro domain Myb transcription factor (InterPro:IPR015495); contains	35.48	31	20	0	100	192	802	832	8.4	25.4
MLN2.Contig_1014	GAAAAGTGGGGAGAAGAATCGAAGATGGGAGATTCGAGGTCGTTTGCGGATGGAATCAAGGGGTTCTGGGAGGAGAGGTTGTCGTTCCTGGAGAATTACACGAGGTTCACCAAACGCGACACGTCTCTTCCTTCTTGGTCTTCCTCCGACGTCGAGGAGTTTATAGCTTCCGATCCCGTTCATGGACCCACCCTGAAAACAGCTAGGGAAGCTGCGACTTTTGGTGTTACTGGAGCTGCACTTGGAGCTCTATCTACTGCTGCTTTTGCCTGGAGATACTCCTAAGAGTCCACACGGTGCTGCATTGTCCTTCTTAGGAGGAGGTGTTTTTGGTTGGACCTTTGGGCAAGAAGTGGCGAACCACAGCTTGCAACTCTATAAGCTGGACACAATGGCGGC…	562	1	AT1G08480.1			similar to unknown [Populus trichocarpa] (GB:ABK92625.1)	81.11	90	13	1	25	282	1	90	8e-55	121
MLN2.Contig_1015	CACGGCTGCAACCATTATCACCATCGCTTGAAGCTGATGCTGATGTTCATTCTCCGGCAGATCAGGAAGAAAACCGTTTTTTAAGAAACTTGGTTCGGGAAACTTCAGTACTGATGATAACTCGTTGAGGAGAAGCAATCTAATGCACATTCCACGACCACCTGGTGAGAGAAAGCAGCAGCAGCAAAAGAAGGTGATGAAGAACACAAACGCAACCCCTAGTCAAAAGACCAGGGCACTGGTCATCATTCGGCAGTGAACAAGCACACAACGGGATAAAGGCGCTGGGGGATGGGACTCACGAGCTATCTAACAGACGGGTACTACAGGGACCACCAACCGTGGCCTGCATACCGGTCAAACTAGTATTTAGCAGATTGCTGGAGAAAATAAATAGAC…	520	1	AT3G03140.1			similar to unknown protein [Arabidopsis thaliana] (TAIR:AT3G21295.1); similar to hypothetical protein [Vitis vinifera] (GB:CAN77845.1); similar to unnamed protein product [Vitis vinifera] (GB:CAO62215.1); contains InterPro domain PWWP (InterPro:IPR000313)	47.44	156	68	4	3	428	615	762	8e-23	103
MLN2.Contig_1016	GGTGGTCGCCGGGTTTGACGATTTGGTATTCACCGGATCAGCCGACGGAACGTTGAAAGTTTGGAAACGTGAGCTCCAAGGGAAAGAGACCAAGAAGCATGTTTTGGTACACGTGTTGATGAAACAAGAGAGCGCCGTAACGGCGTTAGCCGTTAATTTAAACGACGCTGTGGTTTATTGCGGATCATCTGACGGTTCCGTTAACTTTTGGGAACGGAAAAAATATTTGACTCACGGCGGGACAATTCAAGGTCATCGAATGGCGGTGCTATGCCTCACCTCCGCCGGGAGTCTGTTATTGAGCGGCGGAGCTGATAATAATATCTGCCTTTGGAGGAGAAACGGCGACGGATCTCACACGTGTCTTTCTGTTTTGATGGATCACGACGGACCTGTTAA…	553	1	AT1G49450.1	transducin family protein / WD-40 repeat family protein		similar to transducin family protein / WD-40 repeat family protein [Arabidopsis thaliana] (TAIR:AT3G18950.1); similar to unnamed protein product [Vitis vinifera] (GB:CAO47693.1); contains InterPro domain WD40 repeat-like (InterPro:IPR011046); contains Int	81.11	180	30	2	2	529	293	471	8e-69	256
MLN2.Contig_1017	GCTCAAAAAAAAAAAAAAAAAAATCTCTCGTGATTCGAAAGAGATATGAGCTACGAGAAAGTTCCACCGGAATCGTATCCTCCTCCTCCAGGATACCAATCTCATTATCCGCCTCCTGGTTATCCATCGGCGCCGCCGCCTCCGGGATATCCTCCGCCGCATCACGAAGGATATCCACCGCCTCAGCCTCACGGGTATCCACCGTACCCGCCACCGCGTCCTTACGAAGGCGGTTATCAAGGCTACTTCGCCGGTAACTACCCTCCTCCTCCTCCTCCTCCGCCGCAACAGTGCAACCACTACCAGCACGGTCACCACCATTACCAGGATTCGAACTCTGATGGCTCCTCTTTCCTCCGTGGCTGTCTTGCTGCTCTGTGCTGTTGCTGTCTGTTGGAG…	478	1	no significant hit
MLN2.Contig_1018	TCCCCTGCAACATCAAGCACTCAAACCCCATCAGTGGTAGATTTGGCTTCTTCTCAAGCATTTACTCCTCTAGTCAATTTCGTGAACACCATCACTCCAAGACACATTGGAGCCGCCATCGACGCCTCAGAATACGCAAGGATGTTCTCATCTCTCGTGATCGCACTTCTTGTGATACTATCTCACCTCGGGTTCTCTTCCCTAGGCAGCAGCATAGTAAGCTTCAGACCCGTTCTCTTACTTCTCTTGACCGACGCCACAATCGTGCTTGGACGTGTTCTGCTGACCCATCATGGAGCTCCTTCCTCAGCCTCGAGACGAGAGAACTCGGGACAAGGCATAGCGGACCAAGTGGGCAACGCACTGGAGACAGTCATGATGATAAAGAAGATAATGGAT…	622	1	AT4G32680.1			similar to unnamed protein product [Vitis vinifera] (GB:CAO44139.1)	80.13	156	31	1	4	471	127	281	7e-49	190
MLN2.Contig_1019	ATGTCTGTCAAGCTTACACACTGAAGAGGATCCGTGACCCGAGCTACAATGTGACTCTACGACCTCACATCTCTAAGGAGATTGCTGAATCGAGCAAAGAACTCATCGAGCTTAAGCCGACGATCGAGTACGCGCCTGTACTTGAATATACACTCATCCTGACCATGAGCGGTGTCGCTGCTGGTCTACAGAACACCGGTTGAGTGAAAAATAACAGAGATGAGCCTCTCTGTTTCTCCACACTCTGCTTTCGTATATCTACGGATTCAAAAATAATAAGTTATTGCGGTTGGGTTTATTGGTTTGTCTATGTAAATCCACCGTCACAGTGTTGATCTTGGTGTACGAATTACTCTTTCGAGATTATGAACGCATGCTCTGTTTTTTTATTGATCGAAT…	484	1	AT1G53310.3	ATPPC1 (PHOSPHOENOLPYRUVATE CARBOXYLASE 1); phosphoenolpyruvate carboxylase	Encodes one of four Arabidopsis phosphoenolpyruvate carboxylase proteins.	Identical to Phosphoenolpyruvate carboxylase 1 (PPC1) [Arabidopsis Thaliana] (GB:Q9MAH0;GB:Q546E4); similar to ATPPC2 (PHOSPHOENOLPYRUVATE CARBOXYLASE 2), phosphoenolpyruvate carboxylase [Arabidopsis thaliana] (TAIR:AT2G42600.1); similar to ATPPC3 (PHOSP	85.51	69	7	1	3	200	899	967	1e-25	112
MLN2.Contig_102	GGACGGCGTAAGCTACAAGAACAAGAGGCTCTTTCATATCCTTTACTTGCCCTAAACCATGTCGAGGAGAAAGACGAGAGAGCCTAAAGAGGAGACAGTGACACTTGGACCAGCTGTTCGTGATGGAGAGCAAGTCTTCGGTGTTGTCCACATCTTCGCTTCATTCAACGACACTTTCATCCACGTTACTGATTTGTCTGGACGTGAAACCCTTGTCCGTATCACCGGTGGAATGAAGGTGAAAGCTGACAGGGATGAGTCATCACCATACGCAGCTATGCTTGCTGCGCAAGACGTTGCTCAGAGATGCAAGGAGCTTGGAATCACAGCTATGCACGTGAAGCTCCGTGCAACTGGTGGAAACAAGACCAAGACACCTGGTCCTGGTGCTCAGTCTGC…	555	2	AT3G11510.1	40S ribosomal protein S14 (RPS14B)		Identical to 40S ribosomal protein S14-2 (RPS14B) [Arabidopsis Thaliana] (GB:Q9CAX6); similar to 40S ribosomal protein S14 (RPS14A) [Arabidopsis thaliana] (TAIR:AT2G36160.1); similar to cytoplasmic ribosomal protein S14 [Brassica napus] (GB:AAO41731.1); c	96.4	139	5	0	59	475	1	139	7e-63	236
MLN2.Contig_1020	TACAAGAGCTTGTGCCGATTGGCGTTAACGCAACGTACAAGAGTTTATCAGCCATTGCTTCCAACTGTGAGAAGCTCGAAAGGCTAGCGCTTTGCGGGAGCGGAACCATAGGTGATGCGGAGATCGCTTGCATCGCTAAGAAATGCGGGGCGTTGAGGAAGTTCTGTATCAAAGGATGTCCGGTGTCGGATCTAGGGATCGAGGCCCTCGCTGCTGGTTGTCCTAACCTGGTGAAGTTGAAGGTGAAGAAATGCAAAGTGGTGACTGGAGAGATTGGAGAGTGGCTTCGCGAACAGAGGAGGACGCTCGTGGTGAGTATGGATGGTGATGAAACGGAAGCAACGGTAGCTGTGGATGGTGACAGTGACACAGCGTTGGAGGAGCCGAGGGTGGGTCAAG…	411	1	AT5G67250.1	SKIP2 (SKP1 INTERACTING PARTNER 2); ubiquitin-protein ligase	Encodes an SKP1 interacting partner (SKIP2).	Identical to F-box protein SKIP2 (SKIP2) [Arabidopsis Thaliana] (GB:Q9FE83;GB:Q0WWL1;GB:Q940A1); similar to VFB2 (VIER F-BOX PROTEINE 2), ubiquitin-protein ligase [Arabidopsis thaliana] (TAIR:AT3G50080.1); similar to Avr9/Cf-9 rapidly elicited protein 18	87.41	135	17	0	3	407	344	478	2e-56	214
MLN2.Contig_1021	GAAGAGATGATCAAGGACGCGATTGTATCGCTGAAGGAGAGAACTGGATCTAGCCAATACGCGATTCAGAAGTTCATCGAGGAGAAGCACAAGGTGCTTTCGCCTTCGTTCAGGAAGCTTCTGCTTCTCAATCTGAAGAGGCTCGTTGCTTCCGAGAAGCTCGTGAAGGTTAAAGCCTCGTTTAAGATTCCGTCTGCTAAGCCGTCGTCATCTCCCAAGGCGGTTACGGAGAAGAAGAAACCTGCTGCCGCAGCGGCGGTTAAACCCAAGGCGAAGGGGAAGAAGGTTACCGCCGCAGCAGCTGCGAAGAAATCGGCGGCGGTTAAGCCCAAGCCGAAGGCGAAGGTAACTGTTGCGCCCAAGAGGAAGGCTGTTGCTGCTGCTGCGAAGCCCAAGGCT…	568	1	AT2G30620.1	histone H1.2		Identical to Histone H1.2 [Arabidopsis Thaliana] (GB:P26569); similar to histone H1, putative [Arabidopsis thaliana] (TAIR:AT1G06760.1); similar to histone 1 [Malus x domestica] (GB:BAD00018.1); contains InterPro domain Winged helix repressor DNA-binding	91.23	57	5	0	1	171	66	122	2e-15	78.6
MLN2.Contig_1022	TGGTCCGAGACCGTCATGGGAAGGTCAAGCACCATCGGGTTACGGTAACAACGTGGGATATGGAAATGCTGCTGCTGCTCCTTGGGGTGGTTCTGGTCCTGGTTCAGTAGGGATTGGTCAAGGAGGTGCAGCTGCGGGGTATGGCAGTCAGGGTTATGGCTATGGTGGAAATGATTCCTCTTATGGAACACAATCTGGTTATGGTGCAGTCGGTGGGCGGCCCAACAGCCATGGCGGTGGCTATGCTGATGTGTCAGATGGCTCTGGAGGGTATGGAAACCACCAAGTGAACGGGCAAGCTGGATATGGCGGAGGTTATGGTAGACAAGCTCAACAACAGTGATTGGAGGAATAAAGACTACTGCAATGGTGGTTTTGTCCCTGACCTCTGAAACCTCC…	489	1	AT2G33410.1	heterogeneous nuclear ribonucleoprotein, putative / hnRNP, putative		similar to heterogeneous nuclear ribonucleoprotein, putative / hnRNP, putative [Arabidopsis thaliana] (TAIR:AT4G14300.1); similar to hypothetical protein [Vitis vinifera] (GB:CAN68016.1); contains InterPro domain RNA recognition motif, RNP-1; (InterPro:IP	72.5	40	6	2	188	292	346	385	4e-09	57.4
MLN2.Contig_1023	GGTCCCATCGGTCGTGACCCTTTTGTTGCAATCCCAAATGGGTTTGGATGTGCTTTGGGGACAGTGCAGTTGATTCTCTACTTCATCTACTGTGGAAACCAAGGCGAGAAATCAACACATGATGCTGACAAGGATGACAAGAAGACGGTGGAGATGAAAGATGAGGAGAAGAACAAACAAAATGTGGTTAATGGAAAGCAGCAAGTTTACATCTTCGAATGATTGTTTAGCTCTTCTTCACTATAGTAATGCTTTTGTGTCTAGATGTGATGTAAAAAAGACAAAAACTATGCTGAAAAATGTAAGATTCCTACTGA	317	1	AT1G21460.1	nodulin MtN3 family protein		similar to nodulin MtN3 family protein [Arabidopsis thaliana] (TAIR:AT4G10850.1); similar to unnamed protein product [Vitis vinifera] (GB:CAO60898.1); contains InterPro domain MtN3 and saliva related transmembrane protein (InterPro:IPR004316)	78.87	71	15	3	1	213	180	247	6e-25	108
MLN2.Contig_1024	TCATGAGCTCGAGCAGGAGCGCGTTGACGCTCCGCCATGGCGGTTGCGGCCGGAGAAGGATCTTCTTCCGGGGGAGACTCGTCGCAGGGTTCGAGTCCGTCTCCTCCGAGGCAGAGACATCATCAGACGATGATGATGATGCTTCCTCCGTTGTATCCTAGGAGTCAGGGGTCTGTTGGTAATTTGAAGTCGTCTCAATCGTCGATGGAGTTTTGTGCCTTGAGATCGTACTCGGTGGCTGATATCTCGAGGTGTTTTCCGGCGAGTGGTCTTGGGTCAAGTGACGACTCGTAGGGATCATGACATTTGTTTTGTTGAAGTTATATTAATAACCCTTTTTAGGTTTTTGGATTTAACGTCCGGAGAATGTATAGACGAGTTTGAAAACTTTGAAATGGA…	523	1	AT5G21940.1			similar to unknown protein [Arabidopsis thaliana] (TAIR:AT3G43850.1); similar to unknown [Populus trichocarpa] (GB:ABK93792.1)	74.55	55	13	1	103	264	200	254	3e-17	84
MLN2.Contig_1025	AGCTGACGGTGGAATCAGTAGAGACTGTTAATAATCTGATATCGTGTACCGTTCAGAAGATTAAAGCTGCTCTTCATTGTGATAGCAACTGAGGTGAAATGGGACGGTGTGTGTCAGTGTGTGTGGATTGAGTCAAGAACGAACCTCATCTTTGTCAGGACTTCCTGGTGTTATGGTTCGGGTATTTACTCAATATTTAATTTGAAAAAAAAACAAACAACAAAGAACAAAAAGTTTTAGTTTTGGATGCTTTTACTTTGGATTATTGTTGATG	274	1	AT3G61150.1	HDG1 (HOMEODOMAIN GLABROUS1); DNA binding / transcription factor		similar to ATML1 (MERISTEM LAYER 1), DNA binding / transcription factor [Arabidopsis thaliana] (TAIR:AT4G21750.1); similar to ANL2 (ANTHOCYANINLESS 2), transcription factor [Arabidopsis thaliana] (TAIR:AT4G00730.1); similar to ATML1 (MERISTEM LAYER 1), DN	100	28	0	0	3	86	780	807	9e-10	58.5
MLN2.Contig_1026	GGATCTCCATTTCTAGAATCAGTGAAGATCTCGAGAGCTTCCTCCATCTCGTGCTCTCTCCATCTCAAGCTCTCTCTCCACCTCGTGGCTCTCTCTCCGTCACGAGCTCTCTCTCCATCTCGGGCTCTCTCTCCGTCACGAGCTCTCTCCATCTAGGGCTCCCTCTCCATCACGAGCTCTCTCCATCTCGGGCTCTCTCTCTTCTCCGAAGAAAACCCATCTCCGATCTCATCTCGAAGCTCTCTTCTCCGAGCTCATCTCATCTCCAAGCTCTCTCTTCTCCTTTTCTCGTTGAGAATCCTTCACATCTCCTTCAGAGGATAACCAGAGACTTTTCATCCGTCTTTACACACGAAAAGGACTCAGACCCTCTCAAGCTCACTCTCTCAAGCTCAGAAC…	535	1	AT4G30710.2			similar to unknown protein [Arabidopsis thaliana] (TAIR:AT2G24070.2); similar to unknown protein [Arabidopsis thaliana] (TAIR:AT2G24070.1); similar to unnamed protein product [Vitis vinifera] (GB:CAO66643.1); contains InterPro domain Protein of unknown fu	75	12	3	0	54	89	352	363	0.32	21.9
MLN2.Contig_1027	GGAGCTCAAGGGATTACTAACTACTGCAAAGCACATGGAGGTGGGAAACGCTGTATATTCTCAGGGTGTGGTAAAGGAGCAGAAGGGAGTACTCCTCTGTGTAAGGCGCACGGTGGTGGGAAGCGTTGTCAATCTGAAGGAGGTGGGATTTGCTCCAAAAGTGTGCATGGTGGGACTAACTTCTGTGTTGCTCATGGTGGTGGGAAGAGATGTGTTGTGTCAGGGTGTACTAAGAGTGCTCGTGGTCGCACTGATTGTTGTGTTAAGCACGGTGGTGGGAAACGGTGTAGGGTTGGTGAGTGTGGGAAGAGTGCTCAAGGGAGTGGTGAGTTGTGCAAAGCTCATGGTGGTGGGAAGAGGTGTTGTTGGGGAGGTGGGGAGTGTGAGAAGTTTGCTAGA…	556	1	AT5G09670.1	loricrin-related		similar to loricrin-related [Arabidopsis thaliana] (TAIR:AT5G64550.1); similar to hypothetical protein [Vitis vinifera] (GB:CAN82910.1)	81.97	183	33	0	1	549	291	473	9e-73	269
MLN2.Contig_1028	CGCAATGTGATTTCTGCCCAGTGCTCTGAATGTCAAAGTGAAGAAATTCAACCAAGCGCGGGTAAACGGCGGGAGTAACTATGACTCTCTTAAGGTAGCCAAATGCCTCGTCATCTAATTAGTGACGCGCATGAATGGATTAACGAGATTCCCACTGTCCCTGTCTACTATCCAGCGAAACCACAGCCAAGGGAACGGGCTTGGCAGAATCATCGGGGAAAGAAGACCCTGTTGAGCTTGACTCTAGTCCGACTTTGTGAAATGACTTGAGAGGTGTAGAATAAGTGGGAGCTCCGGCGCAAGTGAAATACCACTACTTTTAACGTTATTTTACTTACTCCGTGAATCGGAGGCGGGGTAACAACCCCTTCTTTTAGACCCAAGACTCGCTTCGGCGGG…	520	1	AT4G03550.1	ATGSL05 (GLUCAN SYNTHASE-LIKE 5); 1,3-beta-glucan synthase/ transferase, transferring glycosyl groups	Encodes a callose synthase that is required for wound and papillary callose formation in response to fungal pathogens Erysiphe and Blumeria. Mutants are resistant to P. parasitica and exhibit an exaggerated PR1 response.Contributes to PAMP-induced basal	similar to CALS1 (CALLOSE SYNTHASE 1), transferase, transferring glycosyl groups [Arabidopsis thaliana] (TAIR:AT1G05570.1); similar to ATGSL1 (GLUCAN SYNTHASE LIKE-1), 1,3-beta-glucan synthase/ transferase, transferring glycosyl groups [Arabidopsis thalia	24.32	74	56	1	134	355	1046	1103	9.2	26.6
MLN2.Contig_1029	GGGGGATAAACAGCAAACTTAAATAGATATTGAAAGAGTAAATATTCGCCGGCGAAAAATTGTTTTTTTTTTCAAATAAAAACAGTAATAAAAGATGAAAAAAACAATGAAAAAAATAAAATAAGGATTTGTTATAATATTCTAACTCTAATAAAAATTACATTTGTAATGATGATATTACGTTATTTTTAAATAAATCGAAATAAAATTGATCTTTGATTCTATTTCAAAAAAGACATACACAAATTTAGAAGAGATAAGATG	264	1	no significant hit
MLN2.Contig_103	GAGAGACGAAGCCATGGTTAAGTTCCTGAAGCAGAACAAAGCTGTGATCCTCCTTCAAGGCCGTCACGCCGGCAAGAAGGCTGTGATCATCCGTTCCTTCGACGACGGCAACCGCGAGCGTCCTTACGGACACTGCCTCGTCGCCGGGCTCAAGAAGTACCCCAGCAAGGTCATCCGCAAGGACTCAGCCAAGAAGACGGCGAAGAAGTCGAGGGTCAAGTGTTTCATCAAGGTCGTTAACTACCAGCATCTGATGCCTACTCGTTACACGTTGGACGTGGATCTGAAGGAAGTTGCGACTCTCGAGGCTCTGGCTTCGAAGGACAAGAAGGTGGCGGCTCTTAAGGAGGCTAAGGCTAAGCTCGAGGAGAGGTTCAAGTCTGGAAAGAACAGGTGGTT…	587	1	AT4G15000.1	60S ribosomal protein L27 (RPL27C)		Identical to 60S ribosomal protein L27-3 (RPL27C) [Arabidopsis Thaliana] (GB:P51419;GB:O23354); similar to 60S ribosomal protein L27 (RPL27B) [Arabidopsis thaliana] (TAIR:AT3G22230.1); similar to unknown [Populus trichocarpa] (GB:ABK92640.1); similar to u	94.07	135	8	0	14	418	1	135	1e-57	219
MLN2.Contig_1030	GGTCAGTCAGTTCCCCACACACACGAGCACACCAAAGCGGCCTCTTGCGACGACACCTAGGGTTTCACGAGTGAAATCTCAATTCCATGGCGGACGACGATTACCAAGATGTCGACGATTTGGGGTATGAGGATGAGCCAGCAGAGCCGGAGATTGAAGAAGGAGTAGAGGATGATGCCGAGATGAAGGAAAATGATGATGTGGATGGTGAACCTATTGAGGCAGAGGATAAGGTGGAGGAGGAAGCTGTGCCACGTCCGCGTAAAACATCAAAGTTTATGACCAAGTATGAACGTGCTAGGATACTAGGCACTCGTGCTCTCCAGATAAGCATGAATGCACCTGTGATGGTGGAGCTGGAGGGTGAGACAGATCCACTCGAGATAGCAATGAAGGAGC…	572	1	AT5G51940.1	DNA-directed RNA polymerase II, putative		similar to DNA-directed RNA polymerase II, putative [Arabidopsis thaliana] (TAIR:AT2G04630.1); similar to DNA-directed RNA polymerase, 14 to 18 kDa subunit [Medicago truncatula] (GB:ABN08140.1); contains InterPro domain RNA polymerase Rpb6; (InterPro:IPR0	96.43	112	4	0	183	518	33	144	2e-57	218
MLN2.Contig_1031	GAAGGAGAGGCAAGAGGCAAGTCGGAGCAAAGCAGAAGTGAGAAGAAGAGTCGCAAAGCCATGCTCAAACTCGGGATGAAACCCATCACTGGTGTCAGCCGAGTCACCGTCAAAAAGAGCAAGAACATAATGTTCGTCATCTCTAAACCCGATGTTTTCAAGAGCCCAGCATCAGACACGTACGTCATCTTTGGAGAGGCCAAGATAGAGGATTTGAGCTCGCAGATGCAGTCGCAGGCCGCAGAGCAGTTCAAGGCTCCGGATCTCAGCAACGTGATCAAGGGTGAGTCTTCGTCGAGCGCTGCTGCAGTGGTGCAGGATGATGATGAGGATGTTGACGAGGATGGTGTTGAGCCAAAGGACATTGAGTTGGTGATGACGCAAGCAGGAGTGACTAGG…	517	1	AT3G12390.1	nascent polypeptide associated complex alpha chain protein, putative / alpha-NAC, putative		Identical to Nascent polypeptide-associated complex subunit alpha-like protein 1 [Arabidopsis Thaliana] (GB:Q9LHG9); similar to nascent polypeptide associated complex alpha chain protein, putative / alpha-NAC, putative [Arabidopsis thaliana] (TAIR:AT4G10	85.9	156	22	1	1	468	50	203	2e-50	194
MLN2.Contig_1032	CCTTTGCTCGTATCATGGGAGGTGGCTATGCTCGGCGCCTTTTGCAGGTTGGGATCAGATCGATAAACAAGGAAGGACGAGAACAGGGCAAGAGATTTGGAGTAGAACAGTATGAGATGCGAACTTTCTCGAGAGATCGTGAAGTTTTGGAAAATCTGAAACTAGGGGAAGGAGTGAAGGGTGTGTACATCTCCATCGATGTTTACTGTCTTGATCCGGCGTTTGCACCTGGAGTGTCACACATCGAACCAGGAGGTCTCTCCTTCCGAGATGTTCTTAACATCTTACATAATCTTCAAGGAGATGTGGTCGGGGCTGATGTTGTCGAGTTCAACCCCCAGCGTGATACTGTCGACGGCATGACGGCCATGGTCGCCGCTAAGCTTGTTAGGGAACTAG…	558	1	AT4G08900.1	arginase		Identical to Arginase [Arabidopsis Thaliana] (GB:P46637); similar to arginase, putative [Arabidopsis thaliana] (TAIR:AT4G08870.1); similar to arginase [Brassica napus] (GB:AAK15006.1); contains InterPro domain Ureohydrolase; (InterPro:IPR006035)	94.93	138	7	0	3	416	205	342	1e-69	258
MLN2.Contig_1033	GGCCGCCGCGAAAACGAGTAAAGAAAAATCCAAGACTCGGCGAAGGTTGAGAAAGGAGAAAGGTGAGAGATGCAATCCCAAGGAATATGGAGCACACTATGGAGGAAATACGCAGATTATAAGTACAACAAGTTCGAGAGGTTCGCTGTCTGGGAGATGATCGAGCCTTACCGTCGACCCAAAACCTTCACAGCTTTGATTACTATCTACGTCGCCGCCTTTTACACCGGCGTCATCGGGGCTGCGGTTACAGAGCAGCTTTACAAGGAGAAGTTTTGGGAAGAGCACCCAGGCAAAACGGTGCCTCTGATGAAGCCATTGTACTATCGAGGACCATGGAGGGTTTATCGTGGCGAAGCTATTGCTTCTGATGCT	375	1	AT4G29660.1	EMB2752 (EMBRYO DEFECTIVE 2752)		similar to unnamed protein product [Vitis vinifera] (GB:CAO65369.1)	94.95	99	5	0	79	375	2	100	1e-54	207
MLN2.Contig_1034	GGCATAAGCTACTAGTCAGCGTCTCCTGCATATCTTCCCCTCTTTCTTCCAAGCACAACCCTAGAAACTCGAGTCATGAGGGGTCTGATCTCCGGCGCGAAGAGGCTATGGACAACACCACCACCGACGGCGATAGCCACCGCCATAGCGAGAAGAAGCTACAGCGTAATACCGATGGTTATCGAGACTTCATCGCGAGGCGAGAGAGCTTACGATATCTTCTCGCGCCTGCTCAAGGAGCGTATAATCTGCATCAACGGCCCCATAAACGACGACACGTCCCACGTCGTCGTAGCTCAGCTTCTCTACCTCGAGTCCGAGAATCCTTCGAAGCCGATTCACATGTACCTCAATTCACCGGGCGGACACGTCACCGCCGGTCTTGCGATTTACGATACT…	448	1	AT5G23140.1	CLPP2 (Clp protease proteolytic subunit 2); endopeptidase Clp	One of several nuclear-encoded ClpPs (caseinolytic protease). Contains a highly conserved catalytic triad of Ser-type proteases (Ser-His-Asp). The name reflects nomenclature described in Adam et. al (2001).	Identical to ATP-dependent Clp protease proteolytic subunit 2, mitochondrial precursor (CLPP2) [Arabidopsis Thaliana] (GB:Q9FN42); similar to CLPP5 (NUCLEAR ENCODED CLP PROTEASE 1), endopeptidase Clp [Arabidopsis thaliana] (TAIR:AT1G02560.1); similar to	88	125	15	0	73	447	1	125	1e-54	208
MLN2.Contig_1035	GGAAGAAGAGAAGAAGCACGCTCCTTCTCTCTTTCCCCTTTGATCAATTCTCCTCGATCGAAAGCATTTCAATCTCATAAATCCCCGATTCTCGAGGGATGGCGGCCGTAAATGGATACCAAGGAAATACCCCGGCGGAGACAACCCCGGCAGCCACCGGATCGAAACAACCTGCTCCTCCGTCTAAAACCGTCGATAGCCAATCCGTTCTCAAAAGGCTGCAATCTGAACTTATGGGCTTAATGATGGGAGGTGATCCGGGGGTATCTGCTTTCCCAGAGGAAGACAACATATTCTGCTGGAAAGGAACAATCACAGGGAGCAATGATACTGTCTTCCAAGGAACAAAGTACAGACTCTCACTCGCTTTCTCCAACGATTATCCTTTCAAACCTCCCG…	576	1	AT3G20060.1	UBC19 (UBIQUITIN-CONJUGATING ENZYME19); ubiquitin-protein ligase	Encodes one of two ubiquitin-conjugating enzymes belonging to the E2-C gene family (the other being UBC19). Transcript is always found in dividing cells, but also in other non-dividing cells. Protein is localized to the cytoplasm as well as to the nucleu	similar to UBC20 (UBIQUITIN-CONJUGATING ENZYME 20), ubiquitin-protein ligase [Arabidopsis thaliana] (TAIR:AT1G50490.1); similar to unknown [Populus trichocarpa] (GB:ABK93364.1); similar to unknown [Populus trichocarpa] (GB:ABK94306.1); contains InterPro d	91.19	159	14	0	99	575	1	159	4e-83	303
MLN2.Contig_1036	TGGCCACGCCTCTGACTCATTCACACTAGACTGGGGGGGCTACGACGCTGGAAACAATGGATTTAACATGAACGGATATTACTTCCCCGCCGCCGGAGGAAAGAGAGGATCCGCCGCGAGAGCAGCGGAGCATGAAAGGAAGAAAGGTGTTCCATGGACAGAAGAAGAGCACAGACAATTTCTGATGGGTCTGAAGAAATATGGAAAAGGCGATTGGAGAAACATAGCTCGAAACTTCGTGACCACACGGACGCCAACGCAAGTCGCAAGTCATGCTCAAAAGTATTTCATAAGGCAAGTCAACGGCGGCAAAGATAAACGCCGTTCAAGCATCCATGATATCACCACCGTCAACATCTCAGACTCTCCTGATTGTTGGAACCAGCTTGAAGATAGCTT…	538	1	AT2G38090.1	myb family transcription factor		similar to myb family transcription factor [Arabidopsis thaliana] (TAIR:AT5G58900.1); similar to MYB transcription factor [Hevea brasiliensis] (GB:AAU06309.1); contains InterPro domain Molecular chaperone, heat shock protein, Hsp40, DnaJ (InterPro:IPR0156	94.44	126	5	1	2	373	90	215	5e-49	190
MLN2.Contig_1037	GGTGGAAGATGAAGATGGAACTGAATCGGAGCTCAAGAGCGTGACTACGATGGAAAGTTCCGATTTGATTGGATCCGGTGGAGGTGAAGATGTCATGTTACCGACGGAGATTTCAAAGGGGAATCATATGCCACCGAGGATGACTGAATCGGAGAATATCCCTCCGGCTGAGAAACCTTTAGTTTCTTCAAGGTTTGGCCACCGTAAATCAGTTAAAGCTAGCCGAGAAGGCGGAAGATCGATGTTGAGGGTGACGAAGCCGAAGCGGAACGAAACACTGGAGAATACTTGGAAGATGATAACTGAAGGGAAGTCAACAACGTTAACCAAACAGTTATACCGGAGATCCGACACGTTTAGCCGTGGCGATTCCGGCCATAGCGGCGAGGCGAGACCAGT…	589	1	AT1G61260.1			similar to unknown protein [Arabidopsis thaliana] (TAIR:AT1G11220.1); similar to unknown [Populus trichocarpa] (GB:ABK92540.1); contains InterPro domain Protein of unknown function DUF761, plant (InterPro:IPR008480)	69.59	194	58	5	11	589	162	333	4e-66	247
MLN2.Contig_1038	ACCAAAACGAAAAATTCTCCGGTTTCTCCTCCGGCGGAAGAGACACAGAAAGCGGGTATCGGGTCTACCCGAATCTTCACGGGCTACTTCTCGACCACCGAGATGGAACTATCGGAGGACTACACGTGCGTGACGTGTCACGGGCCTAACCCGAAAACGATCCATATA	168	1	AT3G22550.1	senescence-associated protein-related		similar to MARD1 (MEDIATOR OF ABA-REGULATED DORMANCY 1) [Arabidopsis thaliana] (TAIR:AT3G63210.1); similar to unnamed protein product [Vitis vinifera] (GB:CAO71192.1); contains InterPro domain Protein of unknown function DUF581 (InterPro:IPR007650)	61.02	59	19	2	4	168	135	188	3e-14	73.6
MLN2.Contig_1039	CTATGATGAGCATCTTCAAATGAAAGTTTAATTTAAGAAGTTGTAAATGGAACGAAGATTGATGATGATAGCTCGATTCTTTTGGCTGGTTCTGGTTTTCGATTTGGTTCTCAGAACTTCTGGCAACGCCGAAGGTGATGCTCTGAGTGCTCTGAAGAACAGTTTATCCGACCCTAACAAGGTGCTTCAGAGTTGGGATGCTACTCTTGTTACCCCTTGTACTTGGTTTCATGTTACTTGCAATAGTGAGAACAGTGTTACCCGTGTTGACCTTGGGAATGCCAATCTATCTGGTCAGCTCGTAACGCAGCTTGGCCAGCTCCCAAACTTGCAGTACTTGGAGCTTTATAGCAATAACATCACTGGGCCAATCCCAGAGCAGCTTGGGAACTTGACGGA…	554	1	AT4G33430.1	BAK1 (BRI1-ASSOCIATED RECEPTOR KINASE); kinase	Leu-rich receptor Serine/threonine protein kinase. Component of BR signaling that interacts with BRI1 in vitro and in vivo to form a heterodimer. Brassinolide-dependent association of BRI1 and BAK1 in vivo. Phosphorylation of both BRI1 and BAK1 on Thr re	Identical to BRASSINOSTEROID INSENSITIVE 1-associated receptor kinase 1 precursor (BAK1) [Arabidopsis Thaliana] (GB:Q94F62;GB:Q9SZC0); similar to SERK1 (SOMATIC EMBRYOGENESIS RECEPTOR-LIKE KINASE 1), kinase [Arabidopsis thaliana] (TAIR:AT1G71830.1); simi	92.54	134	10	1	47	448	1	133	7e-63	221
MLN2.Contig_104	GAATGCTGTTGGTGGATTTGGCGAATGCTTTAACTGGGGTAGGGCAAACGATGGCATATCAAGTTGGGGGAAGGACAATTATTCTAGTGGGGGATCTAACTGGGGCAACCAGGTCGTTGGATCAAGCTGGGGTCAACAGGATGGTKGTGGTTTTGCTTGGGGTAGCCAGAACAACAACTATGGTGGTGGGGGTCCAAGCTGGTCCAGTCTAGGTGATGGCGGTCGTGGGTTTGGTGGACGAAGAGGATACTGGGGTAGCTGGGATTTTAGTTCCAAGAATACTGGTGGAGGCTGGGAAGCCAACACTGGTGGAGGCTGGGAAGCCAACACTGGTGGAGGCTGGGAAGCCAACACTGGTGGAGGCTGGGAAGCCAACACTGGTGGAGGCTGGGAAGCCAA…	737	2	AT5G04290.1	KOW domain-containing transcription factor family protein		similar to KOW domain-containing transcription factor family protein [Arabidopsis thaliana] (TAIR:AT4G08350.1); similar to unnamed protein product [Vitis vinifera] (GB:CAO68890.1); contains InterPro domain Transcription antitermination protein, NusG, arch	32.35	68	41	2	2	190	901	964	0.002	39.7
MLN2.Contig_1040	GCATCTCGTCCATGCTCACATCCGAGCGCCACGGTGTTCTTGTCCCTCCGGTGGTGGTGTTGCTGGCTTTCTTGCATTGGTTTTGAGGCTTCTTTTCAGGTTGTGGCGATGTATACAACCCGTCTTTCTGCAGGTTTCATAGACGGTTGAAGCGTGTGCTTGCTCGTTTTGGGATGCGGTTCAAAGCGTCGTGTGGCGTTTCATACATTCCGGCTTTGGTGGCGTTTGCAAGGCCTTGGTAAGTATTTGAATCCTCCCCTTCGATCGTTTCGAGCTTCATAGACAGAGAAAGTTGCAAGTTGGGTGGAGATCATCGGGAACTAGCTACTCCGGAGACGTTAAGGGAACTCCCGGCATCCTCGGCAACGAGGAGAACCTCACTTTCCCAAGAGTCACGTC…	564	1	AT2G30940.1	protein kinase family protein		similar to protein kinase family protein [Arabidopsis thaliana] (TAIR:AT1G01540.2); similar to unnamed protein product [Vitis vinifera] (GB:CAO49484.1); contains InterPro domain Protein kinase, core; (InterPro:IPR000719); contains InterPro domain Protein	29.09	55	37	1	254	412	111	165	2.8	28.5
MLN2.Contig_1041	GGCCGAACCAACTGTCCTCCGGGAACCCCTAAAGAGAAAAAAATCCTCATCAATTGCCTTCTTCCTCAAGAAACCTCTTTCCTCTTTCAATTTGAATTTCCC	102	1	AT5G52380.1	zinc knuckle (CCHC-type) family protein		similar to zinc knuckle (CCHC-type) family protein [Arabidopsis thaliana] (TAIR:AT3G43590.1); similar to unknown [Populus trichocarpa] (GB:ABK94395.1); contains InterPro domain Zinc finger, CCHC-type; (InterPro:IPR001878); contains InterPro domain Zinc fi	53.57	28	13	1	2	85	24	50	3.7	26.6
MLN2.Contig_1042	GTCTCCTCACCGTTAAAAGCAAGAGACCTACTCTGCATCAGAGGTGGGAAGGTTTTCTCGGGGAGAGATCGGACGGTCAGAAACCGATCTTCAGCGTTCGGAGATCGTCGATAATCGGACGGTGCACGATGGAAGTAGAAGTATACGACGAAAGCGGAAAAGAGTACACCATAGACGGCGACTTCTCCTTGCGAAGCTGTCTCATATACGACACGGAGAAGCGAACCGTGGCAGAGATCAAACGCAAAGTGGACATGTCAACGAACGTGATGCTTGGACGAGATGTGTTCACTCTCGAGATCAAACCCGGTTTCGACGGCGCTTTCGCGATGGGTTTGGTCCTCGTGCTTGACCAGATCAACGGTGATGATCCCGTTGAGATTGGTGATGAGCAAGTAC…	606	1	AT3G15810.1			similar to unknown protein [Arabidopsis thaliana] (TAIR:AT1G80120.1); similar to unknown [Populus trichocarpa] (GB:ABK95691.1); contains InterPro domain Protein of unknown function DUF567 (InterPro:IPR007612)	92.03	138	11	0	3	416	83	220	2e-69	258
MLN2.Contig_1043	GCAACATTGGTTGATTCCTCAAGACCCTTCGAGCCCCCAGTCTGTTGGTACAGTAGCAAGCCGAGTCGAAAACTTGGCTCTTGGTGAGAGCTCGGCAGGTCCAAATGGTGGCTCAAGCAGTCAGCTGCAACCTGCGGGAGCAGAAAACAAAGCTGTTTCAGATGGTCAGCAACAGTCTCCTGGTGGTGTTCCAGGGAGCAACCGCAATGGCTCGGATGGTGCAAACCGTTGAACCATCATGTTTGGAGCTGGTGGTTAGTGCTGGACATGAAATATGTATTATTTCGTCCTGCCTAAAATCAGGAAAAAAAACAATAATGAAGGGGGAATCCAAAAGAGAGAGAGAGAGAGAGAGAGAGAGAGAGAGAGATAAAGGTAAGGCATAAAACCA	391	1	AT4G35890.1	La domain-containing protein		similar to La domain-containing protein [Arabidopsis thaliana] (TAIR:AT5G66100.1); similar to unnamed protein product [Vitis vinifera] (GB:CAO23265.1); contains InterPro domain Winged helix repressor DNA-binding (InterPro:IPR011991); contains InterPro dom	51.85	81	34	3	2	229	447	523	2e-07	51.2
MLN2.Contig_1044	GAACACACTACTAAGGGAAAGAGAGAGAAGTCTTTTCTCCGATCCCCAAAACGCAGGAAAACAATGTCGTTTACCAGCTCCCACCTCCTTCCTCCGCAAGAAGACCTTCCTCTCCGACACTTCTCCGATCAATCCCACCAACACCCGCAGCCTCACTTCTCCGAAACACCGTCCCTCCTCACCGCCACCTTCCTCAACCTCCCTCCCGCCGCAGCCACGGCGGACTCCGATTTCGCGCCTCCGAATCGCGGCGGAGACAGCTCCTCCGCCGCCGCTGCTACGAACCGACGGTGGCTCTCCTTCGACTCCTCCGAGATCCAAAACACCGGGGAAGCCCCCTCTGAAGTCATCGACGGAGTCAACGCCGACGGAGGAGGCGAGGATTGGAAGAGCGCGAGC…	604	1	AT4G32040.1	KNAT5 (KNOTTED1-LIKE HOMEOBOX GENE 5); transcription factor	A member of Class II KN1-like homeodomain transcription factors factors (together with KNAT3 and KNAT4), with greatest homology to the maize knox1 homeobox protein. Regulates photomorphogenic responses and represses late steps in gibberellin biosynthesis.	Identical to Homeobox protein knotted-1-like 5 (KNAT5) [Arabidopsis Thaliana] (GB:P48002;GB:O49387;GB:Q548P2); similar to KNAT3 (KNOTTED1-LIKE HOMEOBOX GENE 3) [Arabidopsis thaliana] (TAIR:AT5G25220.2); similar to KNAT3 (KNOTTED1-LIKE HOMEOBOX GENE 3), t	78.8	184	31	4	64	591	1	181	1e-74	275
MLN2.Contig_1045	GCCGTTGCTTCAAGGTTGAACGTGGGCACACGATCCTTGTCCACGCTGCAGCTGGTGGAGTTGGCTCTCTGCTGTGTCAATGGGCAAATGCGCTTGGAGCTACCGTCATTGGAACCGTCTCGACCAATGAGAAAGCGGCTCAAGCCAAAGAAGATGGATGCCACCACGTTATCATGTACAAGAACGAGGACTTTGTTTCACGGGTGAAAGACATTACATCAGGCAAAGGAGTCGATGTTGTTTATGACTCGGTGGGGAAAGACACCTTCAAAGGATCGTTAGCGTGTTTAAAGAGCAGAGGATACATGGTGAGCTTTGGACAATCCTCCGGATCTCCTGACCCGGTTCCGTTGTCTGATCTTGCTCCAAAGTCGCTCTTCTTGACAAGACCTTCCATGA…	561	1	AT5G61510.1	NADP-dependent oxidoreductase, putative		similar to oxidoreductase, zinc-binding dehydrogenase family protein [Arabidopsis thaliana] (TAIR:AT4G21580.1); similar to Ted2 [Vigna unguiculata] (GB:CAA69914.1); contains InterPro domain Alcohol dehydrogenase GroES-like (InterPro:IPR013154); contains I	95.7	186	8	0	3	560	216	401	4e-101	363
MLN2.Contig_1046	GGGATTATTGGAAACTCAACTCTACACGCAATACTACTACTCCCCTTTGGTTGTCTGTGTGTTTTTATAAAGTTTGATACTTTAACCGTTTTTTCTTATTAATGGGGTATAATCAGCCTGATCCAGATGCTCTTCGTTGGGGTCTCCTCGATCTCGAAGTTTGCACCCTCACAAACGCTGGCTCTTGCGGCAGCGTTACGCGTTACGAGACAGATGATGCTGCTGTCGCTCAAGGCTACGTTAGAGAAGGTTACAACCAGCCTCTCACTGGCTACGCGGACAATGATGCGGTTATAGCTCAGTTTTACCAGGACGAGTTGTCTAGAGTTGAACGAGCTGAAGAAGCGTCTCGTCTGAGGCTTAGTGATAATCCTAGTCGGATCTCTGTTGTTTCACAAG…	622	1	AT5G04250.2	OTU-like cysteine protease family protein		similar to OTU-like cysteine protease family protein [Arabidopsis thaliana] (TAIR:AT5G03330.2); similar to OTU-like cysteine protease family protein [Arabidopsis thaliana] (TAIR:AT5G03330.1); similar to unnamed protein product [Vitis vinifera] (GB:CAO6891	65.76	184	44	8	102	596	1	173	3e-54	207
MLN2.Contig_1047	GGACAAACTTTGTTGACTGCTTGGAGAAGTTCTTTGTTGATCCTCAGACAGAGGGTATTGTTCTCATTGGAGAAATAGGAGGCACTGCTGAAGAAGATGCTGCAGCTTTGATAAAGGCAAGTGGTACTGAGAAGCCTGTTGTTGCTTTCATTGCTGGACTCACTGCACCACCGGGTCGTCGAATGGGTCATGCAGGAGCTATTGTTTCCGGTGGGAAAGGGACAGCTCAGGACAAGATTAAGAGTCTAAATGATGCAGGAGTGAAGGTTGTTGAATCACCGGCTAAGATAGGAGCGGCTATGTATGATCTCTTTAAAGAAAGAGGTCTTTTGAAGCAGTGAAGTTGAGTCTCACACTCACTAGCTCCTTCTTCTTGAAACCTTCAAGAAGAAAACAAAC…	405	1	AT5G08300.1	succinyl-CoA ligase (GDP-forming) alpha-chain, mitochondrial, putative / succinyl-CoA synthetase, alpha chain, putative / SCS-alpha, putative		Identical to Succinyl-CoA ligase [GDP-forming] subunit alpha-1, mitochondrial precursor [Arabidopsis Thaliana] (GB:P68209;GB:O82661;GB:P53586); similar to succinyl-CoA ligase (GDP-forming) alpha-chain, mitochondrial, putative / succinyl-CoA synthetase, a	97.32	112	3	0	3	338	236	347	2e-57	217
MLN2.Contig_1048	CACTGAAGTACCAGACGAGGTGTGTTACTGCCTTCCCTGATCAGCAAGGATTTTTGGTTGGTTCAATTGAAGGGCGAGTTGGTGTCCATCATTTGGATGATTCTCAACAGAACAAGAACTTCACATTCAAATGCCACAGAGATGGGAATGAGATCTATTCTGTCAACGCTCTGAACTTCCACCCGGTACAAGGAACTTTTGCCACTGCTGGCTCAGATGGGGCTTTCAATTTCTGGGACAAGGATAGTAAACAAAGACTCAAGGCCATGTCAAGGTGCAGTCAGCCAATTCCTTGCAGTTCGTTTAACCACGACGGGTCGATATATGCATATGCGTCGTGCTATGACTGGAGCAAATGTGCAGAGAATCACAACCCAGCAACTGCGAAAAGCAGCATCT…	545	1	AT1G80670.1	transducin family protein / WD-40 repeat family protein	This gene is predicted to encode a protein with a DWD motif. It can bind to DDB1a in Y2H assays, and may be involved in the formation of a CUL4-based E3 ubiquitin ligase	Identical to Rae1-like protein At1g80670 [Arabidopsis Thaliana] (GB:Q38942;GB:Q9SAJ0); similar to transducin family protein / WD-40 repeat family protein [Arabidopsis thaliana] (TAIR:AT1G15850.1); similar to unnamed protein product [Vitis vinifera] (GB:CA	94.16	154	8	1	3	461	196	349	3e-84	307
MLN2.Contig_1049	GAGGTCCTCTGTAAAAACTTGCCACCTGAGTTCACTTCCTACTTCCTCTATGTGAGCTCGTTACGGTTTGAAGACAAACCAGACTATTCCTACTTAAAGAGGCTTCTCACATCACTATTCATCCGAGAAGGTTATCAGTCTGACTATGTATTCGATTGGACTATCTTAAAGTATCCGCAGTTCGGGTCCAGCTCCAGTTCCAGTTCTAGTTC	212	1	AT1G04440.1	CKL13 (CASEIN KINASE LIKE 13); casein kinase I/ kinase		similar to CKI1 (CASEIN KINASE I), casein kinase I/ kinase [Arabidopsis thaliana] (TAIR:AT4G14340.1); similar to CKL10 (Casein Kinase I-like 10), casein kinase I/ kinase [Arabidopsis thaliana] (TAIR:AT3G23340.1); similar to CKL8 (Casein Kinase I-like 8),	88.71	62	7	0	1	186	238	299	1e-28	121
MLN2.Contig_105	TGATCTCTCTTTGCTCTGCTGCTASATTTYGGAAACTTCTAGCTAAGGCTTCTTCTTTCCAAAGCAAGACCACGATTTTTCTTCATGGCTACCGGAGAGGAGAAACCTGTTATGGTCGTCGGTATSGACGAAAGCGAGCAGAGCACTTACGCCTTGGAGTGGACCCTCGATCGTTTCTTCGCTCCTTATGCTCCTAATTTTCCTTTCAAGCTCTTCATCGTCCACGCCAAACCTAACGCCGTCTCTGCCGTTGGTCTTGCTGGTCCCGGAGCTGCGGAGGTTCTGCCGTATGTTGATACCGATTTGAAGCATATTGCTGCCAGGGTTATCGAGATGGCTAAAGGTATCTGTCAGAGCAAATCGGTTGATGGCGCTATGTTCGAAGTTTTTGAAGGTGAT…	701	3	AT2G47710.1	universal stress protein (USP) family protein		similar to unknown protein [Arabidopsis thaliana] (TAIR:AT5G49050.1); similar to universal stress protein family protein [Brassica rapa] (GB:ABV89633.1); contains InterPro domain UspA; (InterPro:IPR006016); contains InterPro domain Universal stress protei	85.81	155	22	0	85	549	1	155	2e-75	278
MLN2.Contig_1050	GCAGCTCAAGGATGTAGCTGAGAAGTTGCCTCCTGGTGAGAGCATCAAACTCGGATTAGACCAGAACGGTTTCCATTTCCCTGAAGAAAACGGTTTCCACTCTTCAAGATCAGAGTCAATGACATCTTCTATATCTTCAGTTGCTCCCTTTGACTTCGCCTTTGCGAATGCATCTTGGTCCAATCTCCAATCACCGAAGCACACGCCTAGAGCCGGCGAAAGAAACAACAACAACAACAACACCGCTTATCCCTCAGACCCACGGCTTAGCAGCAGCGGGTCAGTTATCAGTGAGAGACACGAGCCTTTCCAGTTCCATAACAATGGTTCTAGCCAAACAGGAGCTGAAAACAATACTGATCAGGTAGAAGCAGAGTGGATAGAACAGTATGAGCCCGG…	610	1	AT1G76950.1	PRAF1; Ran GTPase binding / chromatin binding / zinc ion binding		similar to Ran GTPase binding / chromatin binding / zinc ion binding [Arabidopsis thaliana] (TAIR:AT5G19420.1); similar to zinc finger protein, putative / regulator of chromosome condensation (RCC1) family protein [Arabidopsis thaliana] (TAIR:AT5G42140.1)	86.54	208	18	5	2	595	897	1099	1e-78	288
MLN2.Contig_1051	GCACTCCAGCAGCAACAACAACAACAGCAGCAGCAGCAGAATGATAATTCGGCGATGTGGCATCACGGCCATGGTTCTCGAACCATGTCAGGTGTTCCGGCTAACGCGTACTACAACCTCCAACAACAGCAGCAACTACAACAAGCTCAGCAAGCAGCAGGAGGGTATCGCCAGGCTCAGCAACAACAGCAGTATGGGTCTCATGGCTACCCTAATTTCTATCAGTCCCAAACAGAAATGTCGCACGAGCGTCAGCAGCAAAACCCTAGAGACGGTGCAGGAGCTCAGCCCTCGAACCAAACCCAGCAGCAGCTCTGGCAAAACTCTTACTAAAATAAAAGAAAGTTGAGTGATTTTCTTTAGCTCCTTTCTGTTATAGAGAGGTTTGTGTGGCGAGGC…	447	1	AT1G29370.1	kinase-related		similar to unknown protein [Arabidopsis thaliana] (TAIR:AT1G29350.1); similar to unnamed protein product [Vitis vinifera] (GB:CAO66902.1); contains InterPro domain Protein of unknown function DUF1296 (InterPro:IPR009719)	66.67	108	25	2	40	330	724	831	1e-24	108
MLN2.Contig_1052	TCCTCCCTCGAATCCCAACAACCCCCCCTCGCCACCCCCGCCTTCCGCGCTTTCATCAACCGCATCTCCGAAACCGTCTCCAACGGCCTCTCCCAGCGCCGCCCCTGGTCCGAGCTCGCCGACCGCTCCGCCCTTTCCAAGCCCGAGTCCATCTCCGACGCCGCCCTCCGCATCCGCAAGAACTACTCCTACTTCAAGGTCAACTACCTCGCCGTCGCCACGGGCATCGTCGGCTTCTCCCTCGTCACGCACCCCTTCTCCCTCGCCTTCCTCCTCTGCCTCCTCGCCTCCTGGCTCTTCCTCTACCTCTTCCGCCCCTCCGATCAGCCCATTGTCGTCCTCGGCCGCACCTTCTCCGATCGCGAGACGCTCGGATGCTTGATCTTGTTCAGCATCTTC…	480	1	AT2G38360.1	prenylated rab acceptor (PRA1) family protein		similar to prenylated rab acceptor (PRA1) family protein [Arabidopsis thaliana] (TAIR:AT3G56110.1); similar to unnamed protein product [Vitis vinifera] (GB:CAO48788.1); contains InterPro domain Prenylated rab acceptor PRA1 (InterPro:IPR004895)	88.12	160	19	1	1	480	23	181	8e-64	239
MLN2.Contig_1053	CATTTCGAAAAACGGATGATTTGAAGAAGGTCCACTAGTACTACCAGGCCCGACCACCGGAGTCATAATCCCACCGTTCATAGAAGACGACCACTCTCCTTTACCCGGTTGGATGGTGGAGTCTCTCAAAGCCGT	135	1	AT5G25460.1			similar to unknown protein [Arabidopsis thaliana] (TAIR:AT5G11420.1); similar to unknown [Ricinus communis] (GB:CAB02653.1); contains InterPro domain Protein of unknown function DUF642 (InterPro:IPR006946)	90.91	44	4	0	2	133	197	240	3e-18	86.7
MLN2.Contig_1054	GGTCACACTTTGGATTGTACACTTGCAAAGCCTCAAGCGGATCAAAAGGCGAATACACCAACAGGTCAGAACATGCAGAACTCACTGTTGCAACCAAACTATCCTCCTCTTCTTGGTTATGGCATGGCTCCTAGTCCCTTTGGTGCTCTTGGTGGATTTGGCGCTTCTCCTTACCCACAACCGTTAATGCATGCGGGAGGTCACGCAGCTGGTGGGATGGCGATGATGCCAATCATGTTACCCGATGGAAGAATCGGCTACGTCTTACAACAGCCTGGACTAGCAGCAGTGCCACAACCTCCACCAAGGCATTCACCACCGTATAGGGGAAGCGGTTCCAGCAGCAGTAGCAGCAGCAAAAGAAGTAGCAGCGACAATGGTAGAGGAAGAAGCCGTTAC…	539	1	AT3G52660.2	RNA recognition motif (RRM)-containing protein		similar to RNA recognition motif (RRM)-containing protein [Arabidopsis thaliana] (TAIR:AT4G00830.2); similar to RNA recognition motif (RRM)-containing protein [Arabidopsis thaliana] (TAIR:AT4G00830.1); similar to unnamed protein product [Vitis vinifera] (	87.63	97	12	0	1	291	336	432	1e-35	145
MLN2.Contig_1055	GGCCACATTTCAGATTTCTAGTAATTGGTTTTCAGAAATGGCGGAGGGAACGTTCAAGGTATTGCTGTGGGGTTTAGCGGCAATGGTGTTTGCAATGGCCGAAGGGGCTCGTGGACAGCGCGTGCCTTGCTATTTCGTTTTCGGAGACTCAGTTTTCAACAACGGTAACAACAATGACTTGAACACCTCCGCTAAAGTTAACCATTCACCTTATGGTATGGATTTAGCTAGAGGTCCCACGGGCCGGTTCAGCAATGGCCGTAATATTCCCGACTTTATCGCTGAACTAATGAGATTCAGTGATTACATTCCACCTTTCACCGGAGCATCGCCGGAACAAGCTCACACCGGTTTAAATTACGCTTCTGGCGGCGCGGGAATTCTCGAAGATACTAGCTA…	583	1	AT2G19050.1	GDSL-motif lipase/hydrolase family protein		similar to GDSL-motif lipase/hydrolase family protein [Arabidopsis thaliana] (TAIR:AT2G19060.1); similar to unnamed protein product [Vitis vinifera] (GB:CAO47979.1); contains InterPro domain Lipase, GDSL; (InterPro:IPR001087)	79.67	123	25	0	38	406	1	123	5e-53	203
MLN2.Contig_1056	GTTCTTCCACCAACTGAACTGGTTGATGTGGACATTGCAACACAAGTAAGCATTAAAGATGATGGACCAGACCGCAGTTTACTATACATAGAAACAGCAGATAGGCCTGGGCTATTAGTTGAGCTGGTGAAGATCATTTCTGATATCAGCGTTGCTGTCGAATCTGGAGAATTCGACACCGAGGGTTTGTTGGCTAAGGTAAAGTTCCACGTAAGCTACAGAAACAAAGCCCTTATCAAGCCTCTCCAGCAGGTTCTAGCTAATAGTCTGAGGTACTTCTTGAGGCGTCCATCCACTGACGAGTCAAGTTTCTGAAATGTAATCTACC	328	1	AT1G16880.1	uridylyltransferase-related		similar to ACT domain-containing protein [Arabidopsis thaliana] (TAIR:AT5G04740.1); similar to unnamed protein product [Vitis vinifera] (GB:CAO23176.1); contains domain ACT-like (SSF55021)	92.31	104	8	0	1	312	187	290	2e-49	190
MLN2.Contig_1057	TGCTGGTGTTGATATGGGAATGTGGGATCCTAATAGTGGAGGATGGGGTGGTGGTGGTGAAGATTTGAGTGCTGCCAGAGCTGCGGAATCGAGTTACGGGGAGGAAGCTGCATCGGATCATCAGTATGGAGAGGTTACTCACGATAGAGGGGCTCGTCCGAATCATGTAAAGGATAAAGAGAGGGCTTCAGAAAGGGAATGGTCTGGTTCATCTGATAGAAGGAATCGTGAGGATAAATATGCTGGTTATGAGAGGGACATACCGAGGGAGAAAGATGTTGGTCATGGTTATGATTTGCCAGAGAGAAGGCATCGTGATGATAGAGACACCGGTCGTGAGCGTGAGAGGGAACATCATCATAAGGAGCGTGAACGTTCCAGGGATCGTGACAGAGAAAT…	613	1	AT5G55670.1	RNA recognition motif (RRM)-containing protein		similar to RNA recognition motif (RRM)-containing protein [Arabidopsis thaliana] (TAIR:AT1G13190.1); similar to Os08g0490300 [Oryza sativa (japonica cultivar-group)] (GB:NP_001062111.1); similar to hypothetical protein OsI_030714 [Oryza sativa (indica cul	75.58	172	36	3	2	499	503	673	1e-44	159
MLN2.Contig_1058	GACACCAAAACAAAAACTTAATAAAAATATTAAAATCACAAAATTCTTAAAATCTCTTCTTCAATGGCGACGGGGAAAAGCTACAACGCACGGCCAAGCTACCGTTTCCTCGGCACCGATCAGCCGTACTACGCCGCCAACGATTCGGGATTCGAGTTCGACGAATCCGATCTCTACTCCGCTTCCGATTCCCCCGATTTCCGCCGGAAAATCCCTAAACCGGTCAGATCGGTGAAGAAATCGTCTAACCGTCCGTCCACGTGCGGCGCTTCCTCCGCCGCAGCGGCGTCGTCTCTCCCGGTGAACGTGCCGGACTGGTCCAAGATTCTCCGGGAGGAGCATCGCGATAACCGACGGAGAAGCATCGTGGATGACGACGGAGATTGGTTGGACGCTAGC…	523	1	AT5G60680.1			similar to unknown protein [Arabidopsis thaliana] (TAIR:AT3G45210.1); similar to unnamed protein product [Vitis vinifera] (GB:CAO21845.1); contains InterPro domain Protein of unknown function DUF584 (InterPro:IPR007608)	75.32	158	34	4	64	522	1	156	4e-55	210
MLN2.Contig_1059	GGAGGACTGGAGAAGCAGATCCAAGAGCTTGTAGAGGCTATTGTGCTTCCCATGACGCACAAGGAGCGTTTCGAGAAGCTTGGTGTACGTCCACCAAAGGGAGTGCTCTTGTATGGTTCTCCAGGGACTGGGTAAAACTCTAATGGCTCGTGCTTGTGCAGCACAGACCAATGCCACTTTCCTCAAATTGGCAGGCCCTCAATTGGTCCAGATGTTTATTGGAGACGGAGCAAAACTTGTGCGTGATGCCTTTCAACTAGCGAAAGAGAAAGCTCCATGCATCATCTTCATTGATGAAATCGATGCAATTGGTACAAAACGTTTTGATAGTGAAGTAAGCGGAGACAGGGAAGTGCAAAGGACTATGTTGGAGCTGCTCAATCAGCTTGATGGATTCAG…	538	1	AT3G05530.1	RPT5A (regulatory particle triple-A 5A); ATPase/ calmodulin binding	a proteasome non-ATPase regulatory subunit	similar to RPT5B (26S PROTEASOME AAA-ATPASE SUBUNIT RPT5B), ATPase/ calmodulin binding [Arabidopsis thaliana] (TAIR:AT1G09100.1); similar to 26S protease regulatory subunit 6A homolog (TAT-binding protein homolog 1) (TBP-1) (GB:O23894); similar to hypothe	100	38	0	0	1	114	174	211	5e-89	79
MLN2.Contig_106	AGAAACAGATCAGCGCTGAAGAATAGTTGATGGCTACCGGAGAGGAGAAGCCAGTGATGGTAGTGGGTGTGGACGAAAGTGAGCAGAGCACCTACGCACTGGAGTGGACTCTCGATCGTTTCTTCGCTCCCTACGCTCCCAATTTCCCTTTCAAGCYCATCATCGTCCACGCCAAACCTAACGCCGTCTCCGCCGTTGGTCTCGCTGGCCCCGGAACTGCGGAGGTTGTGCCTTATGTTGATGCTGATTTGAAGCATAYCGCTGTTAAGGTTATCGAGAAAGCCAAAGCACTCTGTCTGAGCAAGTCGGTTCATGGCGCAATGATAGAAGTTTTTGAAGGCGATGCAAGGAACATCCTGTGCGAGGTTGTTGATAAACACCATGCTTCTCTTCTCGTTG…	659	2	AT2G47710.1	universal stress protein (USP) family protein		similar to unknown protein [Arabidopsis thaliana] (TAIR:AT5G49050.1); similar to universal stress protein family protein [Brassica rapa] (GB:ABV89633.1); contains InterPro domain UspA; (InterPro:IPR006016); contains InterPro domain Universal stress protei	89.4	151	16	0	30	482	1	151	1e-76	282
MLN2.Contig_1060	GGAGAAAACAGAGCAAAATGGCACTGAGAATGTGGGCTTCCTCTACAGCAAACGCTCTTAAGCTCTCTTCTTCTACCTCCAAATCTCATCTCCTTCCTGCGTTCTCCATCTCCAGATGCTTCTCCTCAGTGTTGGAAGGACTCAAGTATGCAACTTCACACGAGTGGGTGAAACATGATGGCTCGGTGGCTACCATTGGCATCACTGACCATGCCCAGGACCATCTAGGAGAAGTTGTGTTTGTGGAGCTGCCAGAAGAGAAAAGCTCAGTGAGCAAAGAAAAGAACTTTGGAGCTGTGGAGAGTGTGAAGGCAACAAGTGAGATTCTATCTCCAATCTCTGGTGAAGTCATTGAGGTTAACACAAAGCTAACCGATTCACCTGGTTTGATCAACTCAA…	587	1	AT1G32470.1	glycine cleavage system H protein, mitochondrial, putative		Identical to Probable glycine cleavage system H protein 2, mitochondrial precursor [Arabidopsis Thaliana] (GB:Q9LQL0); similar to GDCH (Glycine decarboxylase complex H) [Arabidopsis thaliana] (TAIR:AT2G35370.1); similar to hypothetical protein [Vitis vini	93.98	166	10	0	18	515	1	166	3e-76	280
MLN2.Contig_1061	GGGCCCGGCGGACAACACCGGAACAAGCGTGACTCCGCCGTCAGACTTAAACACCTCCCCACCGGAATCGTGGCTCAGGCCGTCGAGGACCGTTCACAGCACAAGAACCGAGCTTCTGCTCTTAACCGCCTTCGCACTCTCCTCGCTGTTAAAGTGAGGAACAAGGTGGACATTGAAGCCTATTCTCCTCCGCCTGAGCTTCTGCAGATCCTACCTCCAAAGTCCACCATCAGAACTTCTTCTTCTGGTTCACAGATTGGTCCCAACAATCCTAAATTTGTACCTGGAATGCAAGCTTTGCTTGACGTTATCTCTGCTTCTGACGGTTCCATCGCTGATTCTGCCAAGTTGCTGGGTTTGAGCACTGGTGGCTTGTCTCGTTTGATACTCTCACATGAT…	554	1	AT1G33330.1	peptide chain release factor, putative		similar to peptide chain release factor, putative [Arabidopsis thaliana] (TAIR:AT1G56350.1); similar to unnamed protein product [Vitis vinifera] (GB:CAO44476.1); contains InterPro domain Helix-turn-helix, Fis-type; (InterPro:IPR002197); contains InterPro	97.37	152	4	1	1	456	107	257	8e-61	229
MLN2.Contig_1062	AGTCTCAGGCTGTTACGAAACCTGGTTTACATCCTGCGGATAGTTGGGCGGCCGAATTTGACCAGCATCAGCATGGGATGAATCATGGGGGTCCTGACGCATGGGTCAACTCTTTTGAGCAACAGCATGGTGTGAATGGGTGGGCCACCGAGTTTGAGCAGGGTCAATCTCAACTGATGTCAAACCAAATGAGAAGTATGAATATGCAAAATTTAGCTGCAATGGAGCAGACTCGTAAGCTTGCCCATACACTGTCTCAGGATGGCAATCCGAAATTTCAGAATTCAAGATTCCTCCAGTTTGTTTCAAAGATGAGCCGCGGTGAACTCATTATGGATGAGAATGAGGTCAAGCCTGGTCCAGCCCCTGGGGACTGGGCTACTGAATATGAACAGCAGT…	528	1	AT5G56290.1	PEX5 (PEROXIN 5); peroxisome matrix targeting signal-1 binding	Encodes the peroxisomal targeting signal type 1 receptor that facilitates peroxisomal protein translocation. It recognizes proteins with the PTS1 consensus sequence (tripeptide SKL or a conserved variant) at the extreme C terminus. The protein has severa	similar to SPY (SPINDLY), transferase, transferring glycosyl groups [Arabidopsis thaliana] (TAIR:AT3G11540.1); similar to peroxisomal import receptor PTS1 [Brassica napus] (GB:ABB92565.1); similar to peroxisomal targeting signal-1 receptor [Citrullus lana	85.71	175	25	1	3	527	226	398	1e-77	285
MLN2.Contig_1063	AACGATAAGAATACGAGTTTAGCTGCAGCAATACTCCAAACTACTCTTTCCCCTTTCCCAATATTGGTTTCATGAAGAAAAAGAGCCACAATAATCTCTTCGCGTGTGGTCAAACGCCGCAGACGCTCGACGACGACGCTGCCGCAGCTAGAGCAGTTCTTGAGCTTCTTAACGGCGTTGGTGACAAAGGAAACGTTACTCCCGCGTATTTGTCGGCGGCTTTGTCTCCTTACTTTCCAGGGTTTGGTCGGACTCCTTTGGTGAGGCCGCTGAGAGTAACGGACTCACCGTTTCCGTTAACACCGGAAAATGGTGGCGTGGCTAACGGACACGTGGACCAAGCGGCTGATGATTTCATAAAG	362	1	AT1G52140.1			similar to unknown protein [Arabidopsis thaliana] (TAIR:AT3G16330.1); similar to hypothetical protein [Vitis vinifera] (GB:CAN64915.1)	88.33	120	14	0	3	362	73	192	4e-54	206
MLN2.Contig_1064	CGGCGTCATCGCCGATTACGCGCTCGCCTTCGCGAAAACGTTCAGGTTTCCGGCGACGGCAAGGACGTCTGGATCTTCGATATCGACGAGACGCTCCTCACGAATTTAGACTACTACAAGGCTCATGGTTACGGGTCTGAACCGTTTGAGTCTAATAGCTTCAACGAGTGGGTGGTAGAAGGAACAGCTCCAGCTTTTGAAGCGAGCTTGAGACTGTACAATGCTCTCAAGAAACTCGGTTTCACCGTCGTTCTCCTAACTGGTCGAGACGAGCGCCAAAGAAGTGTCACCGAGACTAATCTCCGAGACGCCGGTTACTCCGGTTGGGAAAGGCTCCTCTTGAGAGGTCCTGAAGATCAAGGGAAGTCAGCTACGAACTACAAGTCCGAGCAGCGGTCG…	488	1	AT4G29260.1	acid phosphatase class B family protein		similar to acid phosphatase class B family protein [Arabidopsis thaliana] (TAIR:AT4G29270.1); similar to unknown [Populus trichocarpa] (GB:ABK92831.1); contains InterPro domain Vegetative storage protein/acid phosphatase (InterPro:IPR014403); contains Int	85.43	151	22	0	34	486	94	244	1e-75	276
MLN2.Contig_1065	GGGAAAAAAGGGAAAGAAAGAAAAGAGAGGATCAATGTTGATAAAAAGAATAGGGCTCTGTATAGAGATAGTGAAGAAAACAATGGATTTTGCGGTTGTGGTGGCTGAGGCCGCGAAAGTCTTCTTGAGGAACGCTCCTCAGGCTCCGCCCGCTCTCCTCCGCCAAGGCCCCTACTATTATTCCGCCTCGACCCCTCGCCCTTCCCCTTACATGATTGGCTATCTTCCATGAGATTATAATTCTTTATGAGATTTCTGTAAATTAATTACTTGGTTAAAAAGTTAATGTAAATTCTATGCTTTCTTTGCTTTTTTTTCAACATGTATTATACGGATTGAAACCTGGTCGGGGATGTTGCACCAGCTATAATCCCATAAACCGGAAGCTACATATCCAAG…	497	1	AT2G15830.1			similar to unknown protein [Arabidopsis thaliana] (TAIR:AT4G33960.1)	60.61	66	25	1	35	229	1	66	8e-11	63.2
MLN2.Contig_1066	ATCGACATCTACAGCAACAGTGCCGTCATCGGACTCACGCCTATAACTCCTGGATCTCAGCTATCATCAACTGGAGCCGAGGAAACCGTTCAGTTCATGATGGTAAACTCGCTTCTCTCGGAATCGTATGAATCATGGCTCCAACACCGTCGTGTCTTTCTCCAGCGCGGGATTTACCATACCTTCATGCAACACGCTCACGGTCGGGCAGCCTCTCGTGCTGCGGAATCATCCAGTTCAGGAGGCAAAAGCCAAGACGCAGCAGAAACCTTAACCGGCGATGAACTTCTCTCTATCGTCAAGCCAATGCTGGTCTACACCGGTATGATAGAACAGCTTCAACAATTCTTTAAACCAAAGAAACCAGCCAACGTCGAACCAAACAAGAAAGAAGGTACG…	621	1	AT3G02260.1	BIG (DARK OVER-EXPRESSION OF CAB 1); binding / ubiquitin-protein ligase/ zinc ion binding	Calossin-like protein required for polar auxin transport	similar to HAC12 (HISTONE ACETYLTRANSFERASE OF THE CBP FAMILY 12), H3/H4 histone acetyltransferase/ transcription cofactor [Arabidopsis thaliana] (TAIR:AT1G16710.1); similar to hypothetical protein OsJ_027370 [Oryza sativa (japonica cultivar-group)] (GB:E	90.62	192	18	1	40	615	4905	5095	7e-83	303
MLN2.Contig_1067	AGTTCCATCAGGATCAGACACATGTTCTTGTTGTCCATGCCAGCCAGTTGGCGATATATGAGGCTCCTAAATTAGAGAACGTGAAGCAGTGGATACCAACGGAGTCAAGTGGTTCAGTGACAGATGCTGTATACTCATGTGATAGCCAGTCTATCTACGCAGCCTTTGATGATGGAAGCGTGAGTATCTTGACGGCAACGACATTGCAACTGAAGTGCCGCATTGGTCCCAGTTCATATTTGCCTTCAAACCCGAGCTTGAGGTTATATCCAGCCACCATCGCAGCACATCCCTCTGAGCCAAACCAGTTTGCAGTTGGGCTTACTGATGGTGGAGTTCATGTGATCGAACCACCAGGACCAGAAGGGAAGTGGGGAATGTCTCCACCTCCAGAAAACG…	618	1	AT3G15880.1	TPR4/WSIP2 (TOPLESS-RELATED 4); protein binding		similar to TPL/WSIP1 (WUS-INTERACTING PROTEIN 1) [Arabidopsis thaliana] (TAIR:AT1G15750.3); similar to TPL/WSIP1 (WUS-INTERACTING PROTEIN 1) [Arabidopsis thaliana] (TAIR:AT1G15750.4); similar to TPL/WSIP1 (WUS-INTERACTING PROTEIN 1) [Arabidopsis thaliana]	93.96	149	9	0	3	449	987	1135	1e-71	265
MLN2.Contig_1068	CTCCCACCTTACCCTCGAATGATAATGGAAGCGATCGGAACGTCGAACGGATGCAACAAAACGGCGATCGTAAAGCACATCGAGTCAACTCAGATCACTTTGCCACCGTCTCACCTGACGCTTCTCAATTACCATCTCAACCGGATGAAACAGTCAGGGCAGATCGTGATTGTGAAAAACAATTACACGAAGCCAGATCCAAATGCTCCTCCTAAGCGTGGCCGTGGCCGTCCTCCGAAACCGAAACCTGAGGGATAAAACAAAGGCACCACCGGGAGACCACGAGGACGACCGCCCTAGAAGTAGATGGTTAAAGACGCAGCGACGGGTGAAGCTAATGACGGTGGGCGTCGAGGGCGTGGAAGGCCACAACATGTGATGGTGCCTACTGGTTGTTAG…	582	1	AT1G14900.1	HMGA (HIGH MOBILITY GROUP A); DNA binding	Encodes a protein belonging to the subgroup of HMGA (high mobility group A) proteins that interact with A/T-rich stretches of DNA.	similar to HON5 (HIGH MOBILITY GROUP FAMILY A 5), DNA binding [Arabidopsis thaliana] (TAIR:AT1G48620.1); similar to high mobility group protein I/Y [Brassica napus] (GB:AAF22135.1); contains InterPro domain Winged helix repressor DNA-binding (InterPro:IPR	72.22	72	17	1	1	207	23	94	9e-26	113
MLN2.Contig_1069	TACATACTGGGTAAAAACCCTCGGAAAATGAGTTATCTGGTGGGTTTTGGCACAAAATACCCGAAACACGTGCATCATCGAGGAGCCTCGATTCCCAAGAACAAAGTTAAATATAACTGCAAAGGAGGATGGAAATGGAGAGACAGCAAGAAACCAAATCCAAACACTGTTGAAGGGGCCATGGTTGCTGTCCTGACAAGCGGGATGGGTTCCGCGATGTCCGGACCAACTACAACTACACTGAACCGACTCTTGCAGGGAATGCTGGCCTGGTCGCAGCTCTCGTGGCATTGTCGGGTGAAGAAGAGGCATCTGGTACTATAGACAAAAATACGATCTTCTCAGCTGTTCCTCCGTTGTTCCCTACTCCGCCTCCCCCACCAGCACCGTGGAAACCTT…	632	1	AT5G49720.1	AtGH9A1 (ARABIDOPSIS THALIANA GLYCOSYL HYDROLASE 9A1); hydrolase, hydrolyzing O-glycosyl compounds	Encodes a membrane-bound endo-1,4-beta-D-glucanase, involved in cellulose biosynthesis. Loss-of-function mutants have severe cellulose-deficient phenotypes. During cell elongation, KOR1 is associated with Golgi apparatus and early endosome. Inhibition of	Identical to Endoglucanase 25 (KOR) [Arabidopsis Thaliana] (GB:Q38890;GB:Q56W54;GB:Q56WU0;GB:Q8H0S4;GB:Q94C24); similar to ATGH9A3/KOR3 (ARABIDOPSIS THALIANA GLYCOSYL HYDROLASE 9A3), hydrolase, hydrolyzing O-glycosyl compounds [Arabidopsis thaliana] (TAI	92.45	53	4	0	192	350	553	605	2e-44	57.4
MLN2.Contig_107	GAATTATATTAGTAGCCAATCACTTACCTTCGACCTKCCACCAGAAACCCTTTGAATAATTGAGGATCATCGGGAGATGGGCGGAGACGGCAAAGTGTTCACCTTGGGCGGAGGTTTCTCAGCACACTAGCAACCAGGACTGTTGGATCGTCATCGACGGCAAGGTATATGATGTGACCAAGTTCTTGGATGATCATCCTGGTGGTGACGAGGTCATCTTGACTTCCACAGGGAAAGACGCGACGGATGACTTTGAGGATGTGGGACACAGCTCCACTGCTAAAGCCATGCTTGATGAGTACTACGTTGGTGATATTGACTCCGCCACTGTCCCAACCAAAACCAAGTTTGTTCCTCCTCCTTCAAACCAGACCCAGTCTAACCAGAACAAGAGCTCGG…	622	3	AT5G48810.1	ATB5-B (Cytochrome b5 B)	Encodes a cytochrome b5 isoform.	similar to B5 #4 (cytochrome b5 family protein #4), heme binding / transition metal ion binding [Arabidopsis thaliana] (TAIR:AT2G32720.1); similar to Cytochrome b5 (GB:P49098); similar to cytochrome b5 [Nicotiana tabacum] (GB:CAA50575.1); contains InterPr	83.85	130	19	1	108	491	11	140	4e-42	164
MLN2.Contig_1070	GGGTTTATAAAGAGTTTAAGCTTGAAGAATATCATCCATGGCTTAAGACAAGGGTTATGGATGCTAATTATTGGTTGACTATAAAGACTTGTCTCTTGAGCTCACTCACTTGCTCCAAGCTCTCTCTTTGGACTCCTATTGATTATCTCCAAAAGGACTTGACTCCTCTACAGTCTGGATGCTGCAAACCACCGACGTCGTGTGTATACAACACGGAGACGCCAATACAACAAGAATCCGATTGTTACCGGTGGAACAACGCTGCAACGGTGCTATGCTACGACTGTGACTCGTGTAGAGCTGGCGTTTTAGAGACAGTGCGGCGCGATTGGCATAAACTCTCTATAGTTAACGTCGTCATTGTTCTCTTCCTCATCGCCATTTACTGCGTTGGGTGTT…	594	1	AT3G12090.1	TET6 (TETRASPANIN6)	Member of TETRASPANIN family	similar to TET9 (TETRASPANIN9) [Arabidopsis thaliana] (TAIR:AT4G30430.1); similar to unnamed protein product [Vitis vinifera] (GB:CAO68973.1); contains InterPro domain CD9/CD37/CD63 antigen; (InterPro:IPR000301)	49.7	169	85	1	3	509	108	275	1e-48	189
MLN2.Contig_1071	GAAGGTCCTCTTTGTGATGAGAACATGAGAGGGATCTGCTTTGAGGTCTGCGACGTGGTGCTCCACTCTGATGCTATCCACAGAGGTGGTGGTCAGGTTATCCCGACAGCGAGGAGGGTTATCTACGCCTCGCAGATCACCGCCAAGCCCAGGCTGTTGGAGCCGGTTTACATGGTGGAGATCCAAGCACCAGAAGGAGCTCTTGGAGGAATCTACAGCGTGCTGAATCAGAAGCGTGGACACGTGTCTGAGGAGATGCAGAGGCCAGGAACACCGCTGTACGACATCAAGGCGTACCTGCCAGTGGTTGAGTCATTTGGATTCTCAAGTCAGCTTAGAGCAGCAACCTCAGGACAGGCCTTCCCTCAGTGTGTGTTTGATCATTGGGAGATGATGTCG…	614	1	AT1G56070.1	LOS1 (Low expression of osmotically responsive genes 1); translation elongation factor/ translation factor, nucleic acid binding	encodes a translation elongation factor 2-like protein that is involved in cold-induced translation. Mutations in this gene specifically blocks low temperature-induced transcription of cold-responsive genes but induces the expression of CBF genes and muta	similar to MEE5 (maternal effect embryo arrest 5), translation elongation factor/ translation factor, nucleic acid binding [Arabidopsis thaliana] (TAIR:AT1G06220.2); similar to MEE5 (maternal effect embryo arrest 5), translation elongation factor/ transla	94.12	170	10	0	1	510	674	843	8e-90	326
MLN2.Contig_1072	CTACTAGTCAAGATCATGTAATGTAAAAAGCCTGAGACTCGTCCATGGCCAAAATAATGGGTTGAGATAATTCCCGCACGTATGCATGTGAACTCGTCTTTACTTTCATATTAAATCAAATAAGTTTGTGTC	132	1	no significant hit
MLN2.Contig_1073	GCAAGCTGCGCAGGGAAAGTCGTCTCTGGCTTCGTTGACCAGACGGACCAGAGCTTCTTAGACGATGACCAGATGAGCGAAGGGTATGTCCTTACCTGTGTGGCTTACCCAACTTCTGATGTCGTCATCGAAACCCACAAAAAAGAAGCCATTGTTTAAAAATTCTAAACCATCCTTAGGCATCATTTAACAGAATATAATAAAATGAGAAGAAGCCTGATGTACAAGTCATCTTTCTCTCTCTTTGTTACATTGCTAATTTGGCTTAACCTTTTGTATAAGATCAACTGATCACAAATTTCAGTATAATTTCTCCTTTTTTTTTTATTTTGGTTGTTTTATTTACATCCAATGTCAATTAGTGTAAAAAAATCATATCCTATGAAAAAACTAAGATAA…	409	1	AT1G10960.1	ATFD1 (FERREDOXIN 1); 2 iron, 2 sulfur cluster binding / electron carrier/ iron-sulfur cluster binding		Identical to Ferredoxin-2, chloroplast precursor (PETF2) [Arabidopsis Thaliana] (GB:O04090); similar to FED A (FERREDOXIN 2), 2 iron, 2 sulfur cluster binding / electron carrier/ iron-sulfur cluster binding [Arabidopsis thaliana] (TAIR:AT1G60950.1); simil	86.54	52	7	0	1	156	97	148	3e-21	97.1
MLN2.Contig_1074	TGGGAATTGGTCGCTCTATAGAGCGGTCATTGCTGAGTTTGTGGCTACACTTCTCTTCCTTTACGTCTCAATCCTCACCGTAATCGGGTACAAAGCTCAGACCGACGCAAGCGCCGGAGGAGCTGACTGGGCGGTGTTGGGATATTGGGGATTGCGTGGGCTTTCGGTGGAATGATCTTTGTTCTCGTTTACTGTACCGCCGGTATCTCCGGTGGTCATATAAATCCGGCTGTGACGTTCGGACTGTTCTTAGCTCGAAAAGTGTCATTGGTGAGGACAGTGTTATACATTGTGGCTCAGTGCCTTGGTGCCATCTGCGGTTGCGGTCTGGTTAAAGCGTTCCAAAGTTCTTACTACAACAGATATGGAGGTGGAGCCAACCAGCTTGCGGAAGGCTAC…	406	1	AT5G60660.1	PIP2;4/PIP2F (plasma membrane intrinsic protein 2;4); water channel		Identical to Probable aquaporin PIP2-4 (PIP2-4) [Arabidopsis Thaliana] (GB:Q9FF53;GB:Q0WQH7); similar to PIP2B (plasma membrane intrinsic protein 2,2), water channel [Arabidopsis thaliana] (TAIR:AT2G37170.1); similar to MipC [Mesembryanthemum crystallinu	79.59	49	10	0	8	154	35	83	4e-64	78.6
MLN2.Contig_1075	GACATTTCCCGAGTCTTCTCTCAGTTTCACTTCCGGGCTTTATCACTCTCTGAACCAACAAAGAAGAAAAAATGAGCTCCCAAATCTGCAGATCTGCTTCGAAAGCAGCAAGGTCTCTTCTCTCTTCAGCTAAGAATGCTCGTCTCTTCTCCGAAGGACGAGCCATTGGTGCGGCGGCTGCGGTTACTGCATCTGGAAAGATGCCTCTCTATGCATCTAACTTTGCCAGATCATCAGGTTCTTCAAAGAGTTGGATCACTGGACTCTTGGCTCTTCCTGCTGCAGCCTTCATGGTTCAAGATCAGGAGGTTTTTGCTGCTGAGATGGAACGCACTTTCATTGCGATCAAGCCTGATGGAGTCCAGCGAGGATTGATATCAGAGATCATTTCTCGATTTG…	575	1	AT4G11010.1	NDPK3 (NUCLEOSIDE DIPHOSPHATE KINASE 3); ATP binding / nucleoside diphosphate kinase	nucleoside diphosphate kinase 3 (ndpk3), located to the inter-membrane space in mitochondria	Identical to Nucleoside diphosphate kinase III, chloroplast/mitochondrial precursor (NDPK3) [Arabidopsis Thaliana] (GB:O49203); similar to nucleoside diphosphate kinase 4 (NDK4) [Arabidopsis thaliana] (TAIR:AT4G23900.1); similar to putative nucleoside di	92.98	171	9	1	72	575	1	171	7e-69	256
MLN2.Contig_1076	GACACACAGCATCTCCGCTCTCACACTTTCAACAACTATTCTCAATTCGATTTCTTCAATTTCGAGACGATGAGCACCGGCGCAGCAAGCGGCACGACCAAAGGAGGGAGAGGAAAGCCAAAGGCCACCAAGTCCGTCTCTCGTTCATCGAAAGCCGGTCTCCAGTTCCCCATCGGGAGAATCGCGAGATTCCTCAAAGCCGGTAAATACGCGGAGCGTGTCGGTGCCGGAGCTCCGGTTTACCTCTCCGCCGTTCTCGAGTACCTCGCCGCTGAGGTGTTGGAGCTAGCTGGAAACGCGGCGAGGGATAACAAGAAGACGCGTATTGTGCCGAGGCATATTCAGCTCGCGGTGAGGAACGATGAGGAGCTGAGTAAGCTTCTGGGAGCTGTGACGATT…	635	1	AT1G54690.1	G-H2AX/GAMMA-H2AX/H2AXB/HTA3; DNA binding	Encodes HTA3, a histone H2A protein. H2AX is a meiosis-specific isoform of histone H2A. Upon DSB formation, rapid accumulation of phosphorylated H2AX (&#947;-H2AX) occurs around the break site. H2AX foci accumulate in early G2. Immunolocalization stud	Identical to Probable histone H2AXb [Arabidopsis Thaliana] (GB:Q9S9K7); similar to G-H2AX/GAMMA-H2AX/H2AXA/HTA5, DNA binding [Arabidopsis thaliana] (TAIR:AT1G08880.1); similar to Histone H2A; Histone-fold [Medicago truncatula] (GB:ABN08174.1); contains I	96.83	126	4	0	118	495	17	142	7e-52	200
MLN2.Contig_1077	GAATATATTGATAGATAGTAACCTCTCTCCTCTCTCTGTTCTCTCTCTAGATCTTACACAGAGAGAGTGAGAGGGTGGTTCTTATTCGCCGATCATTTCCGAGCGAGCGAGAGAGTCTGTTCCAGCAGTCGATGGTCGCTTCAACATCGATTGGCTGGCTTATGTCTCTGACGGCGGGCTCTTCTTATGGTAACACCATTGGCTTGTGGCTCCGACGACACACCAGCGGCTCCGATGTACTCGTCGGCTCTTGGCTTCGCCTCTACCGTTCTCTGATGGAATACATGGCATATATCTCCACGGCTTTCCTGGGTTTGGTGATCTCTGCTTCTTCGGGTCTTCCCTGTTGCATTCAGTTTCATTTCGGTTGG	371	1	ATCG01010.1		Chloroplast encoded NADH dehydrogenase unit.	Identical to NAD (ndhF) [Arabidopsis Thaliana] (GB:P56752;GB:Q9MS93); similar to NADH dehydrogenase ND5 [Capsella bursa-pastoris] (GB:YP_001123422.1); similar to NADH dehydrogenase ND5 [Lepidium virginicum] (GB:YP_001123686.1); similar to NADH dehydrogena	36.11	36	23	1	264	371	121	151	7.2	25.8
MLN2.Contig_1078	GATAGAGAGAAATGGCTAGCTTCACCGCCTCCGCTTCCACCCTCTCGGTCGCTCGTCCTGCTCTCCTTCTCAAGCCCACCGTCGCCGTCTCTGCTCCTGTTCTTGGTTTGCCTCCAATGAGTAAGAGGAAGGGAGGAGTGAAGTGCTCGATGGAGACCAAGCAAGGAAACGTCTCAGCCGTGGGAGCTGGAGTTTCTGCGGCGGCTACAGCAGCTTTGACAGCTGTGATGAGCAGCCCGGCTATGGCTTCGGTGGACGACAGGATGTCAACTGAGGGAACCGGCTTGCCCTTTGGACTTAGCAAAAAACTCTTGGGATGGATTCTTTCGGGAGTGTCTGGTCCTGATCTGGACTTTCTACTCTACCTACACTTCATCTCTCGACGAGGATGAAGAATCT…	439	1	AT2G30570.1	PSBW (PHOTOSYSTEM II REACTION CENTER W)	Encodes a protein similar to photosystem II reaction center subunit W.	Identical to Photosystem II reaction center W protein, chloroplast precursor (PSBW) [Arabidopsis Thaliana] (GB:Q39194;GB:O04338); similar to component of 6.1 kDa polypeptide of photosystem II reaction center [Brassica rapa] (GB:ABL97943.1); contains Inte	86.36	110	15	0	12	341	1	110	2e-37	150
MLN2.Contig_1079	GATAAACATGTCCAAGAAATTAAAATAAGTCCAGGGATAATGTTGTTGATCTTCAAGAGAGCTACAAGTCACGTTCCTTTGAAGATTCTGTCGATAGAAGACGGCACAGTTCTCAAGTCCTTCAATCATTTACTTCACCGGAACAAGAAAGTTGATTTCATTGAACAATTCAACGAGAAACTTCTCGTTAAGCAAGAGAATGAGAATCTCCAAATACTCGACGTCAGAACCGCTGAACAAATGGAAGTTAGCAGAGCAGAGTTCACGACACCGTCTGCGTTCATATTTCTTTACGAGAACCAGCTGTTTCTAACATTCAGGAACCGGAACGTGTCCGTGTGGAACTTTCGTGGAGAGCTGGTGACTTCCTTTGAGGACCATCTTCTATGGCATCCGGAC…	608	1	AT3G54190.1			similar to unknown protein [Arabidopsis thaliana] (TAIR:AT2G38630.1); similar to unnamed protein product [Vitis vinifera] (GB:CAO41317.1); similar to hypothetical protein [Vitis vinifera] (GB:CAN75497.1); similar to unnamed protein product [Vitis vinifera	96.72	183	6	0	1	549	224	406	7e-99	356
MLN2.Contig_108	TGGCCACCGTAGCCATCGGTTCGACGGTGGTGATCCTCCGGAGATTCGAGCTCAACGACATGATGGCAGCGGTGGAGAAGTATAAAGCCACGACTCTGCTTTTGGTGCCGCCAGTTTTGGTGGCTATGGTCAACGAAGCAGATTCTATCAAGGCGAAGTACGATCTGAGCTCACTTAAGACAGTGAGGTGTGGTGGAGCGCCGTTGAGCAAGGAGGCAACGGAGGGGTTTTTAGAAAAGTACCCAACGGTCAATATATTTCAAGCGTATGCGTTGACGGAGTCAAACGGTGGTGGAGCTTTCATTGACACGGTGGAGGACAGCCGGAGATTCGGCACGTCGGGRCCGTTGACGTCTGATGTGGAGGCGAGGATCGTGGATCCGGATACGGGTCGGTTTA…	713	2	AT1G20500.1	4-coumarate--CoA ligase family / 4-coumaroyl-CoA synthase family		Identical to 4-coumarate--CoA ligase-like 4 (4CLL4) [Arabidopsis Thaliana] (GB:P0C5B6;GB:Q9LMV7); similar to AMP-dependent synthetase and ligase family protein [Arabidopsis thaliana] (TAIR:AT1G20490.1); similar to unnamed protein product [Vitis vinifera]	87.23	235	30	0	6	710	259	493	5e-113	403
MLN2.Contig_1080	TTCTCAGGGACTGTCCATGTCGAGCTGTCCTTCACCGATTGGTCATTCGGTTAGGTTGCGTCTCGGATTACCATGGTTTGAACACGTCATCCCAGCACTAGAACCAATCGCCCGGGCGATCTGCGTTTCTAGTGGATGTGTTCTTCCGGTTACTGCGATGGCTCCGGAGTGCTATGTTTGGAATGGCTGCTTCTTCTCAACCCGTTTTGTATGGGTTCTCTTGGTGTTTGTGGCTTCTCTGTTGTCCCCTCTCTGCAATAATGCTCGTCTTCTGTTATGCGAGTGAGGCCGCTCGGGTGTTGCTCTCTGTCCATGGTGGCTACAGTTAAGGACGTCTTTCACGAGCTGTTCTTGAGGACCCATTCTCTTAGATCTGATCATCGGGTACTGCCAATTCTC…	605	1	AT5G11840.1			similar to unknown protein [Arabidopsis thaliana] (TAIR:AT5G67370.1); similar to unnamed protein product [Vitis vinifera] (GB:CAO43828.1); contains InterPro domain Protein of unknown function DUF1230 (InterPro:IPR009631)	33.33	48	30	1	41	178	100	147	1.9	29.3
MLN2.Contig_1081	CACGCTATTAATCTCGGAGACAGTGGATTCACGGTGGTTAGAGACGGGACCACGGTGTTTCAGTCACCGGTTCAGCAGCACGGGCTCAACTTTACTTATCAGTTAGGGTGTGGAGACAGTGGTGGCGACATGCCTCGCTCCGGTCAGGTATTCATGATTGATGTGGAGGCTGGGGATGTGATTGTGGCGGGAACGGACGGTGTGTATGATAATCTATACAACGAAGACATCACAGGAGTGGTTGTTAGTTCGGTTAGAGCTGGACTGGACCCTAAAGGCACTGCTCAGAAGATTGCGGATTTGGCACGTGCGAGAGCTGTTGACAAAAAACGGCAGAGTCCTTTCGCCACCGCGGCTCAGGAGGCTGGCTACAGGTATTACGGAGGAAAGCTTGATGAC…	607	1	AT5G66720.2	5-azacytidine resistance protein -related		similar to catalytic [Arabidopsis thaliana] (TAIR:AT4G16580.1); similar to hypothetical protein [Vitis vinifera] (GB:CAN83089.1); contains InterPro domain Protein phosphatase 2C-related; (InterPro:IPR001932)	88.03	142	17	1	1	426	269	409	2e-66	248
MLN2.Contig_1082	GAAAAGAGTTTATCGGGTCTCTCTCACGAGTCACGGCGTCGACGAAACTGGAGGTGAAGCCATCTCCGATCGAGAGTCGCCGTCATCCCTATCCCACTCCTGCAATATCTACTCCGACGCTGTCGTCGTTAATTTCGGCACCTCCTCGCCAAGTCGCCATCGTCCCTGTCGTGTAAGCCCTAGGTCTGATTTGTCTTTCCTTTTAAATCGACGAAATTGAAATTGTGCGAGCTGTCACTGTCCATGCAACGAATAAATACTCTGTGTCTGCATCGCTTTGACAGTGCTTGGTGCTTCTATGATATGTCCTCCGGTTTATGCTTTGCCCAGATTCGGAAGAAGATGGGTTTGTTCTTGTTGATGTTTCATCTTCTAGGTCTCATGGAGAAAGGCTCGTCT…	574	1	AT3G56980.1	BHLH039/ORG3 (OBP3-RESPONSIVE GENE 3); DNA binding / transcription factor		similar to BHLH038/ORG2 (OBP3-RESPONSIVE GENE 2), DNA binding / transcription factor [Arabidopsis thaliana] (TAIR:AT3G56970.1); similar to hypothetical protein [Vitis vinifera] (GB:CAN64266.1); contains InterPro domain Achaete-scute transcription factor r	73.33	45	12	0	336	470	202	246	7e-13	66.6
MLN2.Contig_1083	GAGAACTCACACATAATCACATTAATAGTCCTCAAAAGGCAAACATCAATGGAAATTGCTGCAGAATGAAGATACTCAAGAAGCCAATCTTCCAGATCTTCTTCATCAGATTCCTCATCTTTACATCAACACATCATAATCAGATCTGATCATTACCCGACGAGTTTTGTCCAAACACACACTTCCTCTTTCAA	194	1	AT3G15300.1	VQ motif-containing protein		similar to VQ motif-containing protein [Arabidopsis thaliana] (TAIR:AT5G53830.1); similar to unnamed protein product [Vitis vinifera] (GB:CAO39301.1); contains InterPro domain VQ (InterPro:IPR008889)	75	24	6	0	121	192	24	47	5e-05	42.7
MLN2.Contig_1084	GAAGTCCAGTCTTCTGCGAGAACCAGAAAAGCGAAAATCGATAGAAATGGATGCGAAGATCGGAAAATTCTTTGACTCCGTCGGTTCTTTCTTCAGCGGCGGCGATAAGATCCCGTGGTCTGAGGGAGATGTCATCGCTGGATGTGAAAGAGAGGTTCGAGAGGCCACAAACTCTGGCAATGAAGGACTGAAGAAAGAGTGTCTTATGCGATTGTCATGGGCGCTTGTTCATTCCCATCAACAGGATGATGTTCAACGTGGGATAGACATGCTTGAAGCGTCCCTTGCGAACAGTGCTCCTCCGTTGGAAGACCGAGAGAAGCTCTATCTTCTTGCTGTTGGTTACTACAGGAGTGGGGATTGCTCTAAGAGCAGGCAGCTCGTTGACCGCTGTATCGA…	612	1	AT3G57090.1	BIGYIN; binding		similar to binding [Arabidopsis thaliana] (TAIR:AT5G12390.1); similar to unnamed protein product [Vitis vinifera] (GB:CAO63076.1); contains InterPro domain Tetratricopeptide-like helical; (InterPro:IPR011990); contains InterPro domain Tetratricopeptide re	86.67	150	20	0	47	496	1	150	1e-60	229
MLN2.Contig_1085	ACCAACGTATCTTCGAGAACAGACAAGTTTCATCTTCTGCGATCTTAACCAAAGCTCTACAAGCCGCACGAGAATGGGAGCTTGCACAATACCCCACCGGCCTCTCAATTGCGAAACCCCCGGCTGTCTCATCGCCAGGTAACCTCCCAACCACGACAATCATCTGCAACACGGACGGAGCCTGGAAAGAGGGATCGGCGGCGGCGGGAACAGGATGGATTTTCAGTAACTCGGAAGGCGAGATCGGTAGAGGAGGTAAGACCCACTACCGTGTTGCGTCACCTATCCTTGCGGAGGCTCTGGCCATAAGAGACGCTTTGCTTCATGGCCTCTCGCCTGGATTCACTTCAATCTGGCTACGATCAGATGCTTAAGCGCTTGTCACGGCGATCACCGCGA…	585	1	AT1G10000.1	nucleic acid binding / ribonuclease H		similar to beta-galactosidase/ nucleic acid binding [Arabidopsis thaliana] (TAIR:AT2G06845.1); similar to hypothetical protein 27.t00122 [Brassica oleracea] (GB:ABD65056.1); contains InterPro domain RNA-directed DNA polymerase (reverse transcriptase), rel	34.17	199	123	4	3	575	109	301	5e-19	90.9
MLN2.Contig_1086	CGATGCGACAAATGCCAACGACACGCTCCGAGTATCCACAGTCCAACCGAGCTACTGCGAACTTCCGCAGCACCTTACCCATTCATGCGATGGGGGATGGATATCATCGGACCAATGCCGAATTCTCGCCAACGTCGTTTCGTGCTGGTATTGACCGACTATTTCACCAAATGGATTGAAGCAGAAGCCTTCGCGCAGGTTACAGAGAAGGAGGTTCGCGGCTTTGTTTGGAAGAACATTATCTGTCGCCACGGCCTGCCATACGAGATCGTGACGGACAACGGATCACAGTTTATGTCCGGAAACTTTAAAGATTTCTGCAATAAGTGGAACATCCGACTAAGCCCTTCAACGCCGAGGTATCCTCAAGGAAACGGACAAGCAGAATCCTCGAATAAG…	569	1	AT5G41070.1	DRB5 (DSRNA-BINDING PROTEIN 5); double-stranded RNA binding	Encodes a double-stranded RNA binding protein.	similar to DRB3 (DSRNA-BINDING PROTEIN 3), double-stranded RNA binding [Arabidopsis thaliana] (TAIR:AT3G26932.1); similar to DRB3 (DSRNA-BINDING PROTEIN 3), double-stranded RNA binding [Arabidopsis thaliana] (TAIR:AT3G26932.2); similar to hypothetical pro	36.67	30	19	0	471	560	239	268	1.3	29.6
MLN2.Contig_1087	CACAACGGTCAAAACTACGTCTTTGCTCTTCTCACGGGTTACCGTGACCCTCCTGCTGGCATTTCGATAAGAGAGGGGTTACACTACAATCCTTATTTCCCTGGGGGAGCAATTGCTATGCCGAAAATGCTTAATGATGAAGCTGTTGAGTATGAAGATGGTGTCCCCGCCACAGAGGCACAGATGGGTAAAGATGTTGTGTCATTCTTGTCTTGGGCAGCTGAACCAGAAATGGGAAGAGAGGAAATTGATGGGTTTCAAGTGGATATTCCTACTATCTCTGGCTCTGCTCCAAGCAGCGTACTACAGGCGACTGAAATGGTCGGTTCTCAAGTCCCGGAAGCTGGTTCTTGACGTGGTGAACTAGAGCACCGCTTACTAAAGCTTTTGCAGTGGCTC…	617	1	AT5G40810.1	cytochrome c1, putative		similar to cytochrome c1, putative [Arabidopsis thaliana] (TAIR:AT3G27240.1); similar to unknown [Populus trichocarpa] (GB:ABK94651.1); contains InterPro domain Cytochrome c1; (InterPro:IPR002326); contains InterPro domain Cytochrome c, monohaem; (InterPr	100	43	0	0	236	364	265	307	1e-52	55.1
MLN2.Contig_1088	GACCAAAGCATCACATACAATATTACTTCTCTTCTCATTTTCTTTATAGTTTTCCTCTTTACCTTTGTCATTTCGAAATGGCCAACGTTGAGGTTGAACAAGTGATTGCTCCAGCAGCAGAGAACGTTGAGGTACCAACCAAGACAGTGGAGGAGCCAGTTGTGGTTACCGAACAGGCGGAAGAAGTCGTGGCCTCTGCTCCTGCTCCAGCCGCCGTAACTGAACAAGAATCCGAAGCACCAGTCGAAGAAACGAGCAAAGAAGTGGTTGTGGATGAGGCAGAGAAAAAAGATCAAGAAACTGAGAAGAAACCAGAGGAGCCAAAGGTAGAGGAGGAAGAAGAGAAGACAGAAACTCCGGTCGTTGTGGAGGAGGCAAAAACAGAAGAGAAGGAGGAGG…	615	1	AT1G12080.2			contains domain PTHR22683 (PTHR22683)	71.43	21	6	0	219	281	45	65	0.06	34.3
MLN2.Contig_1089	CATCTAGCTTCAAGCATGATGGCTGTTCTTGCCGTCTGTTGATAGGAGTTCTTTGCTCCCCTGTGGCTCACGATTCTGGAAGGAGATCGTCTGTCTGTGTTTCGTGACTCTTCCTCGTTCAGAAGCCGTTATCTTTTTGAGTCTCCTGGTTGTGTGAAGGGACCGGAGTCGAGTGCTGTGAACCTCCGCTTGCTTCCGCCAGGTTATCTCCGGGGTCCATTTGCTCGGTTCTCCTCGTTGGTTTAAGGTGTTCAGAAACTCGTCACGTTGATCCTGGAGCTACTTTCGGCGTCTGGAGTGGTTTTCCACTAGACGATGGCCGGACCGGGACCTAGTCAACCCCGCTTCGCCTATTGTTTAGCTCGGGATCGCCTTCGGGATAGGCTTCGGCCCCTAAGC…	565	1	no significant hit
MLN2.Contig_109	AGCCACAACCCCAACCTCCTCCCCAAAAGCCTAAAGATTCTCCCAAAGCTCCTGAGAAGCCTAAGGAGCCTGAGAAACCTAAAGAGCCTGAAAAGCCAAAGCAACCTGAAAAGCCTAAAGAACCCGAGAAACCTAAAGAACCTGAAAAGCCTAAGCAACCCGAGAAGCCTAAAGAACCCGAGAAACCTGCTGCGCCCAAAGCTGCACCCGCACCTGCTCCAGCACCAGCACCAGCACCGGCACCTGCTCCAGCTCCCGCTCCTGTCCCGAAGCAGCCTGGACCTCCGCCACAGATGGTGCCAATAATGCCGCAGGGGCAGCCAGCAGCCATGTGTTGTGGGCCCTACTATGGTGGTTATGGATGTGGGCCAACGTTCAATGGATATGGAATGCCGCCGC…	664	2	AT4G16380.2	metal ion binding		similar to heavy-metal-associated domain-containing protein [Arabidopsis thaliana] (TAIR:AT1G51090.1); similar to unknown protein [Glycine max] (GB:AAN03471.1); contains InterPro domain Heavy metal transport/detoxification protein; (InterPro:IPR006121)	71.43	84	21	3	291	533	153	233	3e-27	118
MLN2.Contig_1090	GGTGGCAAACGTCTTGATAGGGAACAAAAAGACATGGCTTCTTCTTCTTCTTTTTTCACTTACTCTACTCAGACCACACTGCGCTCCCATCTTCACAGAAACACCTTTCTCACCAAAACCCAATTTCCAGTTCCCACAAAATCATCAGAATCTAACTTCTTTGGTCTCAGACTCTCTCCCTCCACCTCTCGCTCTCCCCTCTCTCCCTGTTCTTTCAAAAGCTCAATCTTTGCTAACGTTAACAAGGGGCAGAGTGCACCAGACTTCACACTAAAGGATCAAAATGGAAAGCCGGTGAGCTTGAAGAAGTATAAAGGGAAGCCTGTTGTTGTATATTTCTACCCTGCCGAT	351	1	AT3G26060.1	ATPRX Q; antioxidant/ peroxiredoxin	encodes periredoxin Q which decomposes peroxides and plays a role in the protection of the photosynthetic apparatus	Identical to Peroxiredoxin Q, chloroplast precursor (PRXQ) [Arabidopsis Thaliana] (GB:Q9LU86); similar to 2-cys peroxiredoxin, chloroplast, putative [Arabidopsis thaliana] (TAIR:AT5G06290.1); similar to Peroxiredoxin Q, chloroplast precursor (Thioredoxin	73.63	91	24	0	79	351	16	106	6e-28	119
MLN2.Contig_1091	CTCGCTCCGCGCTCTATCTCCGCCGTCAAATTCCAGTTCCCACTTCGCCGGATTCGAACCGGAGACTTAAACCTTTCCTCGCTATCTTCATCAACTCGATCCACTCCTCGCCCTATTGAAGCAAAGAAGCAGACATATAACTCGTTTGATGATCTCCTTGTGAACTCTGAGAAGCCTGTTCTTGTCGACTTCTACGCGACCTGGTGTGGCCCTTGTCAGTTCATGGTTCCGATTCTCAGTGAAGTGAGTGAAACATTGAAAGACAAGATCCAGGTGGTGAAGATTGATACGGAGAAGTATCCGAGTATTGCTAATAAATACAAGATCGAGGCGCTTCCTACGCTTATCTTATTCAAAGATGGGGAGCCTTGTGACCGATTTGAGGGTGCTTTGGCGGCG…	580	1	AT1G76760.1	ATY1 (Arabidopsis thioredoxin y1); thiol-disulfide exchange intermediate		similar to ATY2 (Arabidopsis thioredoxin y2), thiol-disulfide exchange intermediate [Arabidopsis thaliana] (TAIR:AT1G43560.1); similar to unnamed protein product [Vitis vinifera] (GB:CAO43620.1); contains InterPro domain Thioredoxin family (InterPro:IPR01	85.62	146	21	0	4	441	26	171	4e-62	234
MLN2.Contig_1092	GGAGAGTTTGTAGTTGTGAACTCTCTCTTCCGTTTCAAGAACCTTTTGGATGAGACAGTTGTTCAACAGCCCTAGAGACGCGGTTTTGAAGCTGATAAGGAAAGCGAACCCTAGCGCCTTCATCCAGGCCGTGCTGAGCGGGTCCTACAACGCGCCGTTCTTTGTGACCAGGTTTAGAGAAGCTTTGTTTCATTACTTGGCGCTGTTTGATATGTGTGACTCGAAGCTGGCGAGGGAGGACGAGATGAGGCTGATGTTTGAGAAGGAGTTTTACGGGAGAGAGATCATGAACGTTGTGGCTTGCGAAGGGACGGAGAGAGTTGAGAGGCCTGAGAGTTATAAGCAGTGGCAGGCGAGGGTGATACGAGCTGGGTTTAAGCAGCTTCCGCTTGAGAAGGA…	590	1	AT1G07530.1	scarecrow-like transcription factor 14 (SCL14)		similar to scarecrow transcription factor family protein [Arabidopsis thaliana] (TAIR:AT2G29060.1); similar to unnamed protein product [Vitis vinifera] (GB:CAO21632.1); contains InterPro domain GRAS transcription factor (InterPro:IPR005202)	85.71	21	3	0	1	63	590	610	4e-84	40.8
MLN2.Contig_1093	CTAGACGGATTTATTGACGATATCATCGACGAACATATGAAGAAGAAAGAGAATCAAAACACTGTTGATGATGGAGATGTTGGTGATACCGATATGGTTGATGATCTTCTTGCTTTTTACAGTGAAGAGGCCAAATTAGTGAGCGAGACAACGGATCTTCAGAATTCTATCAAACTTACCCGTGACAATATCAAAGCAATCATCATGGACGTCATGTTCGGAGGAACGGAAACGGTAGCTTCTGCAATAGAGTGGGCCTTAACGGAGTTATTACGGAGCCCCGAGGATCTAAAACGGGTCCAACAAGAACTCGCTGAAGTTGTCGGACTTGACCGACGTGTGGAAGAATCAGACATCGAGAAGTTGACTTTTCTGAAATGCACACTCAAAGAAACCCTA…	558	1	AT4G36220.1	FAH1 (FERULATE-5-HYDROXYLASE 1); ferulate 5-hydroxylase	encodes ferulate 5-hydroxylase (F5H). Involved in lignin biosynthesis.	Identical to Cytochrome P450 84A1 (CYP84A1) [Arabidopsis Thaliana] (GB:Q42600); similar to cytochrome P450, putative / ferulate-5-hydroxylase, putative [Arabidopsis thaliana] (TAIR:AT5G04330.1); similar to cytochrome P450 [Isatis tinctoria] (GB:ABL07485.	93.01	186	13	0	1	558	246	431	4e-78	286
MLN2.Contig_1094	ATCTTTGTATGTATCGTACGAGTGGGTCACCACTGATAAGTTCAACGCCGAGGATGAGGAACACGTGGAGGTCATCCAAGGGATCGAGAGGGGTGACGCGCTTCCTGGCCTTAGGGCTTACTCCGATATAGCCCAGGCCGCCAAGAAAGTTGGGTTCCAAGTTGTCAAGGAGAAGGATCTTGCCGCTCCACCGGCTGAGCCCTGGTGGACTAGGCTTAAGATGGGTCGCCTCGCTTATTGGAGGAACCACGTTGTCGTTCAGATCTTGTCTGCCGTTGGAGTTGCGCCTAAGGGAACCGTCGATGTTCATGAGATGTTGTTTAAGACTGCTGATTTCTTGTCCAGAGGAGGCGAAACTGAAATTTTCTCTCCCATGCATATGATTCTCTGCCGGAAACC…	508	1	AT1G20330.1	SMT2 (STEROL METHYLTRANSFERASE 2)	Encodes a sterol-C24-methyltransferases involved in sterol biosynthesis. Mutants display altered sterol composition, serrated petals and sepals and altered cotyledon vascular patterning as well as ectopic endoreduplication. This suggests that suppression	Identical to 24-methylenesterol C-methyltransferase 2 (SMT2) [Arabidopsis Thaliana] (GB:Q39227;GB:Q8H155;GB:Q8L7L3;GB:Q8LCB0;GB:Q9LN25); similar to SMT3 (S-adenosyl-methionine-sterol-C-methyltransferase 3), S-adenosylmethionine-dependent methyltransferas	88.89	135	15	0	2	406	222	356	5e-69	256
MLN2.Contig_1095	GGCCTTCGAGATCTTCACGCAAGAAGCAGAAATGGCGGTTCCGTTGCTAACGAAGAAGGTCGTGAAGAAGAGGTCTGCCAAATTCATCAGACCCCAGAGTGATCGCAGAATCACCGTCAAGGAAAGCTGGAGGAGGCCAAAGGGTATTGATTCCAGGGTGAGGAGGAAGTTCAAAGGTGTCACCTTGATGCCCAATGTTGGTTACGGATCTGACAAGAAGACCCGCCACTATCTCCCTAACGGATTCATGAAGTTTGTTGTTCACAACTCTGCTGATCTCGAGTTACTCATGATGCACAACAGGACTTACTGTGCTGAGATTGCATCCAATGTATCAACAAAGAAGAGGAAAGCCATTGTGGAGAGAGCTTCCCAGCTTGACATTGTCGTTACCAACAG…	528	1	AT4G18100.1	60S ribosomal protein L32 (RPL32A)		Identical to 60S ribosomal protein L32-1 (RPL32A) [Arabidopsis Thaliana] (GB:P49211;GB:Q8LC86;GB:Q9SVW1); similar to 60S ribosomal protein L32 (RPL32B) [Arabidopsis thaliana] (TAIR:AT5G46430.2); similar to 60S ribosomal protein L32 (RPL32B) [Arabidopsis t	95.49	133	6	0	32	430	1	133	1e-68	255
MLN2.Contig_1096	GGGAAGCTGGAGGTTGAGCTCTTGTATAAGCCATTCACAGAGGAAGAAATGCCAAAGGGCTTCGAAGAATCGCAATCAGTGCAGAAGGCTCCAGAAGGCACACCGGCTGGTGGAGGAGTGCTTGCGGTGATAGTGCATTCGGCTGAAGACGTTGAAGGCAAGCACCATACCAACCCTTACGTGCGTATCTATTTCAAAGGAGAGGAGAGGAAAACCAAGCACGTGAAGAAGAACAGAGACCCGAGGTGGGAGGAGGAGTTCACCTTCATGCTCGAGGAGCCTCCGGTGCGCGAGAAGCTCCACGTGGAAGTACTGAGCACCTCTTCAAGGATAGGTCTCTTGCATCCCAAGGAAACACTGGGGTACGTGGACATTCCGGTGGTGGACGTGGTGAACAAC…	589	1	AT2G20990.1	ATSYTA/NTMC2T1.1/NTMC2TYPE1.1/SYTA		similar to ATSYTB/NTMC2T1.2/NTMC2TYPE1.2/SYTB [Arabidopsis thaliana] (TAIR:AT1G20080.1); similar to unnamed protein product [Vitis vinifera] (GB:CAO47374.1); similar to unnamed protein product [Vitis vinifera] (GB:CAO60961.1); similar to hypothetical prot	95.62	160	7	0	1	480	382	541	3e-87	317
MLN2.Contig_1097	CAACTTTTCTGTTCGTCGTCTTCTTTATCGGGACGCAAGCACATGCGCAGCTAGTACCGCCGGCGAGGCTCGATGGTTTCCTTTACCCACCGGGTCGTCGAGTTGACCCGGATACTATACTAATCGAGGCGTTTTTTGACCCGGTTTGCCCGGATAGCAGAGACGCTTGGCCGCCTCTGAAGCAAGTTTTTCAACGCTACGGATCTCGCGTTGCCCTTCTCCTTCACCTCCTTCCTTTACCGTACCATGACAATGCATATGTGAGCTCTAGGGCTTTACACATTGTGAATGCTTTGAACGCAAACGCTACCTTCTGTTTGCTGGAAGCCTTCTTTGAGCATCAGGCATTGTTTTACAACACCCAAACGCAACTCCTGTCTAGACCTGATGTTGTGGAGA…	586	1	AT1G76020.1			similar to unknown protein [Arabidopsis thaliana] (TAIR:AT1G20225.1); similar to unknown [Solanum tuberosum] (GB:ABB55396.1); contains InterPro domain Thioredoxin-like fold (InterPro:IPR012336); contains InterPro domain Thioredoxin fold (InterPro:IPR01233	80.73	192	37	0	9	584	7	198	2e-82	301
MLN2.Contig_1098	GATCGGGGAGGAGAAGTCTCCACCGTCGCACACCCGCCACTGATTCCAGATCCAACTAGCGTGGTTAACTTTTTCAAAGTATGGGATCTCATGGTAAGCAGAAGAAGAAGCGGAGAGATGAATCAGAGTCTGACTCTGACGGTTCTGATGATTTGTCTCCTCCCAGGAGTTCCAGGAGAAGGAAGGGAAGCAGCAGCAGCAGCAGTCGTAGACGCCGTCATTCGAGTGATGATGATTCCTCTGATAGCGATGGTGGACGGAAGAGTAAGAAGAGAACTTCCTCTAAGAAGCCCTCTGAGGAAGAAATCAAGGAGTATATGGCTAAAAAGGCTCAAAAGAAGGCATTACGTGCAGCAAAGAAACTGAAGACTCAGTCAGTGTCTGGCTACTCCAACGATT…	598	1	AT1G03910.1			similar to unnamed protein product [Vitis vinifera] (GB:CAO62957.1); similar to unknown protein [Oryza sativa (japonica cultivar-group)] (GB:AAO37540.1); similar to hypothetical protein [Vitis vinifera] (GB:CAN74141.1); contains domain PTHR21737 (PTHR2173	92.86	56	4	0	369	536	111	166	1e-24	109
MLN2.Contig_1099	CGGGACATGTTTCCTCTTCTCGGAGTCTGGTCTCCGGGAGCTCTAGCGGCTGCCTTAAGGCGAATGTTGGGGACGAGCGAGTATCGCGTAACGCGGAGTGCGATTTGCTTGTGAGAAACGGCGCCGTTGGTATCGCGGCGAGAGGAGAGCTCGCCAGAGACGTCTTGTCATTTGGATCTGTTTCTTCTCCGGGAACCGTTGACGTACTCTTCGCTTGTGCTCCTTCATGGCTGCTACGTGGGCTCGCTAGTGGGGTACAAGGAGTAATGGGCCTCGGAAGGGCCCAGATCTCTCTTCCCTCGCAACTCGCCGCGGAAACTAACGACCGACGTCGTTTAACGCTTTTCCTGTCGCAGTCGAACGGCGTCGTCTCAACGAGTTCGGTTGAAGATGTTTTCG…	634	1	AT5G19120.1	aspartic-type endopeptidase/ pepsin A		similar to extracellular dermal glycoprotein, putative / EDGP, putative [Arabidopsis thaliana] (TAIR:AT1G03220.1); similar to unnamed protein product [Vitis vinifera] (GB:CAO71101.1); contains InterPro domain Peptidase aspartic, catalytic; (InterPro:IPR00	74.75	202	43	1	51	632	92	293	6e-79	290
MLN2.Contig_11	TATGAAGTGAAGAAAGTTAATAAAATTTTTTTCTAATATAATCTAAATCTATCAGTATAGATTAATTAAATGAGCACTCTCATACGGATTTAAAACGTTAAATACAAAAAATTTTTCAAGAAAAAGGGAAAAAATAGTTGGGTTTTAAACTTTTGAATGTCTGTTTTGTTTGAAAAATAATATATAATAAAATTTGAAAGAAAAAATTTACTCAATATGGAGTACGAAAGAATAGAATAATAAATGTCTTTGACATCCAATTATACCACTGAAAAACTTTTTTTCATTTTTGAATGGCAGTTCCAAAAAAACGTACTTCTATCTCGAAAAAGCGTATTCGTAAAAAAATTTGGAAAAGGAAGGGATATTGGACATCGTTGAAAGCTTTTTCCTTAGGGA…	565	3	ATCG01020.1		encodes a chloroplast ribosomal protein L32, a constituent of the large subunit of the ribosomal complex	Identical to Chloroplast 50S ribosomal protein L32 (rpl32) [Arabidopsis Thaliana] (GB:P61847;GB:P42354); similar to ribosomal protein L32 [Capsella bursa-pastoris] (GB:YP_001123423.1); similar to ribosomal protein L32 [Arabis hirsuta] (GB:YP_001123248.1);	100	52	0	0	294	449	1	52	1e-10	62.8
MLN2.Contig_110	GGGAGATTTCTCGTCATAGCTCTGTTGAGGTTATTGACATTTGTGAGATAGACAAGATGGTTATTGATGTGTCTAAGAAGTTCTTCCCCGAGTTAGCGGTTGGATTTGAAGATCCTCGTGTTCAACTTCACATTGGTGATGCTGTTGAGTTCCTTCGTAAGTCCCCTGCAGGGAAGTATGATGCCATTATTGTCGATTCTTCAGATCCTGTTGGTCCTGCTCTGGCGCTTGTTGAGAAGCCTTTCTTTGAAACKYTAGCTAGAGCTTTGAAGCCTGGAGGAGTTCTTTGCAACATGGCKGAAAGYATGTGGCTCCACACTCATCTCATTGAAGACATGATCTCCATTTGCCGCCAGACATTCAAAAACGTTCAGTACGCGTGGAGCAGCGTCCCAACWT…	692	2	AT5G53120.5	SPDS3 (SPERMIDINE SYNTHASE 3)	encodes a novel spermine synthase and is a paralog of previously characterized spermidine synthases, SPDS1 and SPDS2. SPDS3 forms heterodimers with SDPS2, which in turn forms heterodimers with SDPS1 in vivo. The gene does not complement speDelta3 deficien	similar to SPDS1 (SPERMIDINE SYNTHASE 1) [Arabidopsis thaliana] (TAIR:AT1G23820.1); similar to spermine synthase [Malus sylvestris] (GB:BAE19758.1); contains InterPro domain Spermine synthase; (InterPro:IPR001045)	94.85	194	10	0	3	584	160	353	1e-104	375
MLN2.Contig_1100	GATCCAAATCCATTCCTTACTTAAGAAAAAAAAGAAATACAAAAAGTTAAGATTATGGAGGGGCTCCTTAAAGTTGTCGACGTTGGTGGTTGTGTGCATGCTAGTGTCCGCTCCAATGGCGACCGAGGCAGCAATATCGTGTGGCGCAGTCGCCAGCAACTTGGGCCAATGCATCAACTACCTGACAAAAGGTGGTTACATTTCTCCAGGGTGTTGTTCTGGCGTTCGGACGCTCAATAGCATGGCTCGGACCACCACTGACCGCCAGCAAGCTTGTCGTTGCATCCAAGGAGCAGCTAAAGCCTTGGGTTCTAGACTTAATGCACGCCGTGCTGCTGGTCTTCCTGGTGCTTGCCGCGTTAGGATCTCTTACCCCATCAGCGCAAGAACCAACTGTAA…	512	1	AT3G51600.1	LTP5 (LIPID TRANSFER PROTEIN 5); lipid transporter	lipid transfer protein 5	Identical to Non-specific lipid-transfer protein 5 precursor (LTP5) [Arabidopsis Thaliana] (GB:Q9XFS7); similar to LP1 (nonspecific lipid transfer protein 1) [Arabidopsis thaliana] (TAIR:AT2G38540.1); similar to lipid transfer protein [Brassica oleracea]	82.76	116	20	0	62	409	3	118	2e-51	197
MLN2.Contig_1101	CGCCGTCGATGGCTGCCGTGAGTTCATGGCGAGCAACGGAGAGGAAGGTTCGGTGGCAGCGCTAACGTGCGCCGCCTGTGGCTGCCACCGCAGTTTCCATCGTAGAGAAATCGAAACCGAGGTTGTTTGCGACTGTAATTCACCTCCTTCGACTGGAAACTAGACCAGTAAAAACTAGACCTAGGTAAGAGTTAATTGGTTGTGTCTTTGTGTGCTATATATTATACTATAATACACGGCTGAAATTCTTAAAATATATATATTATATTGTTTTAATACCTTCGTAGTGTCAAGGGTTTGTGTCTCGTTGAGAAGTAAAGCAGAAAATTTCAGAGATGTATAGATTGGAGGTTGTGGAAGATCTATAATAACAGGATGCTTTAAGCATGTCTCAGAAAA…	625	1	AT3G28917.1	MIF2 (MINI ZINC FINGER 2); DNA binding		similar to MIF3 (MINI ZINC FINGER) [Arabidopsis thaliana] (TAIR:AT1G18835.1); similar to unknown [Picea sitchensis] (GB:ABK25649.1); contains InterPro domain ZF-HD homeobox protein Cys/His-rich dimerisation region (InterPro:IPR006456)	96.23	53	2	0	2	160	48	100	5e-26	114
MLN2.Contig_1102	CAATAGCGTATATTTAAGTTGTTGCAGTTAAAAAGCTCGTAGTTGAACCTTGGGATGGGTCGCCCGGTCCGCCTTTGGTGAGCACCGGTCGGCTTGTCTCTTCTGTCGGCGATACGCTCCTGGCCTTAACTGGCCGGGTCGAGCCTCCGGCGCTGTTACTTTGAAGAAATTAGAGTGCTCAAAGCAAGCCTACGCTCTGTATACATTAGCATGGGATAACATCATAGGATTTCGATCCTATTGTGTTGGCCTTCGGGATCGGAGTAATGATTAACAGGGACAGTCGGGGGCATTCGTATTTCATAGTCAGAGGTGAAATTCTTGGATTTATGAAAGACGAACAACTGCGAAAGCATTTGCCAAGGATGTTTTCATTAATCAAAAACCAAAGGGGAGCAA…	568	1	AT5G17900.1			similar to microfibrillar-associated protein-related [Arabidopsis thaliana] (TAIR:AT4G08580.1); similar to unnamed protein product [Vitis vinifera] (GB:CAO43282.1); contains InterPro domain Micro-fibrillar-associated 1, C-terminal; (InterPro:IPR009730)	100	12	0	0	383	418	423	434	0.44	31.2
MLN2.Contig_1103	TCTTGAGACCATGGTCGAGTCCCGCCCCAACGTGGTGATCTTCACCACGGTGATCAGCGGATGGTGCGGCATCGGAAGCATGGACGACGCAATGAGGGTATTCAACAGGATGTGCGAGTTCGGCGTCTCGCCGAATATAAAGACCTTCGAGACGCTGATGTGGGGTTACTTGGAAGCCAAGCAGCCGTGGAAAGCTGAAGAGGTTTTGCAGATGATGAAAGGGTTTGGCGTGAAGCCTGAGAACTCTACCTACGTGCTGTTAGCTGAAGCGTGGCGCGTCGCGGGGCTCGGGGATGGGTCGAACAAAGCGATCGAGGCGTTGAAGTGTAGAGATATTGAGAAGTTGGAGAAGCTTTACCAGAAACAGGCATCGGCAGGGGGGTTTAGTCTTTTGCAGAT…	593	1	AT5G25630.1	pentatricopeptide (PPR) repeat-containing protein		similar to protein kinase family protein [Arabidopsis thaliana] (TAIR:AT5G21222.1); similar to hypothetical protein [Vitis vinifera] (GB:CAN61517.1); contains InterPro domain Pentatricopeptide repeat (InterPro:IPR002885)	85.64	188	24	3	2	556	388	574	3e-87	317
MLN2.Contig_1104	GACCCATCGTTTCATCAACGGAGATTTGATCCCAACGAAAACGCGTCTTCTTCTTCTTCATCTTCCTCCTTTCTTTTCTCTCGATTTTGGCTGAAAGCAGCTTTGTCTTTTTTTACTACAACCAAATATGGATGACTGGGAGGATGAACAAATTGCACCACTTCCAGCAAAAGTTGTGCTAAAAAGCAACTGGGATGATGAAGATGTAGATGAGAATGAGATTAAGGACTCCTGGGAGGATGATGATGACGACGACCAACCTGCTCCCCCGCCTCCGGTAAAGCCTGCTCCTCCGAAGAAAGCTGTTGAGAAAAAGGGCAAAGCAGCTGAGGCTCCAAAAGAAGAACCTCTAGATCCTCTCTCTGAGAAACTTCGCATGCAGAGGCTTGTTGAAGAAGC…	650	1	AT1G66070.1	translation initiation factor-related		similar to translation initiation factor-related [Arabidopsis thaliana] (TAIR:AT5G37475.1); similar to unknown [Populus trichocarpa] (GB:ABK92969.1); contains InterPro domain Translation initiation factor eIF3 subunit (InterPro:IPR013906)	67.76	183	50	1	128	649	1	183	2e-55	212
MLN2.Contig_1105	GAAAAATAAAATACTAATAAAAACCCAAACTTTTATTGCTGAGAAACCCTAATCCCCTTTGTGTTCAGATCTTCGAATCGCCATTTTCTCTTAAATATTATGCGAAACCCGTTCTGCTCGTAGTGATTATTTCTCAGTCATGACGATGTTCTTCTCCAAGCTCGGTCGCTCCTCCTTCTCTCGTTCGAGGGTCAGTTTCGATTTCTTCTCAGATTCGTCTTTCAATCGTGTGTTTTAATTATTGTTGTTTGATTTAGTTTTTGCACGGCGGTGGTGTGAGATCGGCGAGGCTGATTGGTCCGCCGGCTGTTGAGGCGGCGGCGTCGGTGAATCAAGAAGGTGGATTAGGGTTCTTGAGTCGGCACTTTGCTTCGTTAACTGGTAGAAAGGGACTTGTCG…	617	1	AT2G29080.1	FTSH3 (FtsH protease 3); ATP-dependent peptidase/ ATPase	encodes an FtsH protease that is localized to the mitochondrion	similar to FTSH10 (FtsH protease 10), ATPase [Arabidopsis thaliana] (TAIR:AT1G07510.1); similar to hypothetical protein OsI_019542 [Oryza sativa (indica cultivar-group)] (GB:EAY98309.1); similar to AAA-metalloprotease FtsH [Pisum sativum] (GB:AAK77908.1);	57.02	121	51	4	258	617	19	107	1e-25	112
MLN2.Contig_1106	AAATGACATTGAAGTTGATGGAACGTTTTGGTGTTAGTGCCGAGCATAGTGATAGCTGGGATCGTTTCTTTGTCAAGGGCGGTCAGAAGTACAAGTCGCCTGGTAATGCTTATGTAGAAGGTGATGCTTCTAGTGCTAGCTACTTCTTGGCTGGTGCTGCTATTACCGGTGAAACCGTCACTGTTGAAGGTTGTGGAACAACTAGCCTCCAGGGAGATGTGAAATTCGCAGAGGTACTTGAGAAAATGGGATGTAAAGTGTCATGGACAGAGAACAGTGTGACTGTGACTGGACCATCTAGAGATGCTTTTGGAATGAGACACTTGCGTGCTGTTGATGTCAACATGAATAAAATGCCCGATGTAGCCATGACTCTTGCCGTTGTTGCTCTCTTTGCCG…	534	1	AT1G48860.1	3-phosphoshikimate 1-carboxyvinyltransferase, putative / 5-enolpyruvylshikimate-3-phosphate, putative / EPSP synthase, putative		similar to 3-phosphoshikimate 1-carboxyvinyltransferase / 5-enolpyruvylshikimate-3-phosphate / EPSP synthase [Arabidopsis thaliana] (TAIR:AT2G45300.1); similar to 3-phosphoshikimate 1-carboxyvinyltransferase, chloroplast precursor (5-enolpyruvylshikimate-	98.87	177	2	0	3	533	289	465	4e-89	323
MLN2.Contig_1107	GATCACTTAGACAAGCCAACTGTGACCGCAAGCTTAGACAAAGAAACAGAGAGAGAGAGAGAAACAGAAAGATGGTGCTAAAGGTGTACGGACCTCACTTTGCTTCACCGGAGCGAGCTCTGGTAACGCTCATCGAGAAGGGCGTCGCCTTCGAGACCGTCCCCGTCGATCTCATGAAAGGAGAACACAAGCAGCCTGCTTATCTCGCCTTACAGCCTTTCGGTACCGTCCCTGCTGTTGTCGACGGCGACTACAAAATCTTTGAGTCACGTGCCGTCATGAGGTACGTAGCTGAGAAGTACAGGTCACAAGGACCTGACCTTTTGGGGAAAACCGTGGAAGAAAGAGGTCAAGTTGAGCAATGGCTAGACGTGGAGGCGACCACTTACCACCCACCGC…	623	1	AT2G30860.1	ATGSTF9 (Arabidopsis thaliana Glutathione S-transferase (class phi) 9); glutathione transferase	Encodes glutathione transferase belonging to the phi class of GSTs. Naming convention according to Wagner et al. (2002).	similar to ATGSTF10 (EARLY DEHYDRATION-INDUCED 13), glutathione transferase [Arabidopsis thaliana] (TAIR:AT2G30870.1); similar to putative glutathione S-transferase [Thlaspi caerulescens] (GB:AAY86780.1); contains InterPro domain Thioredoxin-like fold (In	97.28	184	5	0	72	623	1	184	1e-93	338
MLN2.Contig_1108	CCGGCGCAAACCATGAACGCGATTCAAGAAGTGTTCAAGATTGCACGTGCTCAAACCCTAATTGCCTTGTGCAGCACGGTACCAGGCTACTGGGTTCACAGTTGCGTTCATCGACGTCATTGGAAGATTCGCGATTCAGCTAATGGGATTCTTCTTCATGACGGTCTTTATGTTTGCTCTGGCTATTCCTTACAACCACTGGACTCACAAGGAAAACCGAATCGGATTCGTTGTCATGTACTCGTTAACATTCTTTTTCGCCAACTTTGGACCTAATGCTACAACCTTAGTTGTACCGGCCGAGATCTTCCCGGCCCGGTTCAGATCCACGTGCCATGGTATCTCTGCAGCATCAGGAAAATTAGGTGCGATGGTTGGTGCTTTCGGGTTCTTGTACTT…	601	1	AT2G38940.1	ATPT2 (PHOSPHATE TRANSPORTER 2); carbohydrate transmembrane transporter/ phosphate transmembrane transporter/ sugar:hydrogen ion symporter	phosphate transporter (AtPT2)	Identical to Inorganic phosphate transporter 1-4 (PHT1-4) [Arabidopsis Thaliana] (GB:Q96303); similar to PHT3 (phosphate transporter 3), carbohydrate transmembrane transporter/ phosphate transmembrane transporter/ sugar:hydrogen ion symporter [Arabidopsi	95.86	169	7	0	95	601	362	530	1e-93	296
MLN2.Contig_1109	GAGACTTCTTAAGACACCATTTCACAAGCATTGCCCGAGAGAGAGAAGAATCAAAAACGTAGAATCAAATCAATTATTAAGCAATGGCATCGATGACCATGACATCCACATTCCTCCCGGCCGTTGCAAAGCTCCCGTCAACCACCGGCGGACGAAGGCTCTCGGTGATCAGAGCTTCAACGAGCGACAACACAGCCAGCTTACAAGTCAAGGAGACACAGAACAGCACCACAATGAGGAGGGATCTCATGTTCACAGCTGCTGCTGCGGCCGTTTGTTCCTTGGCTAAGGTAGCCATGGCAGACGAGGAGGAGCCCAAACGAGGGACAGATGCAGCTAAGAAGAAGTACGCTCAAGTTTGTGTCACAATGCCGACAGCCAAGATCTGTCGCTACTGAT…	503	1	AT3G21055.1	PSBTN (photosystem II subunit T)	Encodes photosystem II 5 kD protein subunit PSII-T. This is a nuclear-encoded gene (PsbTn) which also has a plastid-encoded paralog (PsbTc).	Identical to Photosystem II 5 kDa protein, chloroplast precursor (PSBT) [Arabidopsis Thaliana] (GB:Q39195;GB:Q41925;GB:Q9LJC7); similar to photosystem II 5 kD protein [Arabidopsis thaliana] (TAIR:AT1G51400.1); similar to unknown [Brassica rapa] (GB:ABD91	89.42	104	11	1	84	395	1	103	5e-37	150
MLN2.Contig_111	GACGAACAAAAGCTCAGAAGAAGAGAAAACAGAGAGAGAGAAGAAAACAATCTAAGCCGTCGGAGAAGAAGCAAAGAAAAGAAAAGATGTCGTGGCAATCATACGTCGATGACCATCTCATGTGCGATGTGGAAGGCAACCACCTCACATCCGCCGCCATCCTCGGCCAAGACGGCAGTGTCTGGGCCCAAAGCACCAACTTCCCTCAGTTGAAGCCTGCTGAGATAGAGGGAATCAAGAAAGACTTTGAGGAGCCTGGGCACCTTGCACCCACCGGTCTATTCCTCGGCGGAGAGAAGTACATGGTTGTCCAAGGTGAAGCCGGAGCTGTCATCCGAGGCAAAAAGGGACCTGGTGGAGTTACTATCAAGAAGACTAATCAAGCCTTTGTCTTTGGCA…	681	2	AT2G19760.1	PFN1/PRF1 (PROFILIN 1); actin binding	first member of the Arabidopsis profilin multigene family, expressed in all organs of Arabidopsis. Binds poly-L-proline. The first intron of PRF1 enhances gene expression in vegetative tissues.	Identical to Profilin-1 (PRO1) [Arabidopsis Thaliana] (GB:Q42449); similar to PFN2/PRF2/PRO2 (PROFILIN 2), actin binding / protein binding [Arabidopsis thaliana] (TAIR:AT4G29350.1); similar to profilin-like protein [Solanum tuberosum] (GB:ABB16985.1); si	91.6	131	11	0	87	479	1	131	7e-68	253
MLN2.Contig_1110	CATGGTGGCTGAGCAGTTCTTAAACGATGTCGTTGAGCCAAAGATCGAGTTTCCTATGATTACAATCGATGATCAAGAGGACGAAGACAACGCTGAAAGTTGTCTGAATGGTTTTTTCCCGACCGACATGGAGCTTGAGGAGTTCGTGCTGACGTGGAGATTCTACTCGGTCGCGGGTTAGACGTCACAGAGTCCTATGCGATGGAGGAGCTAGGGTTGTCTAATACAGAGATGTTTAAAATCGAAAAAGACGAGATAGAGGAAGAGGAAGGAGAAGAAACAAAAGCCATGAACATGGGAATATGCTGCGGTGAGGATCGGGGCGATGGGGATGGAACTGTGGCGTTTGAGCTGAGGTTTGATCACGACTCACACAACACGTACGAAGAAGAGGCGATA…	560	1	AT1G25440.1	zinc finger (B-box type) family protein		Identical to Zinc finger protein CONSTANS-LIKE 16 (COL16) [Arabidopsis Thaliana] (GB:Q8RWD0;GB:Q9C6L4); similar to zinc finger (B-box type) family protein [Arabidopsis thaliana] (TAIR:AT1G68520.1); similar to unnamed protein product [Vitis vinifera] (GB:C	65.81	155	47	5	112	558	178	329	6e-35	143
MLN2.Contig_1111	TTGCCTGTGGTTATACCGATATGGTTTTTAGCTATTATATTCCCGTTCTTCGGTCCAATCAATTCAGCGGTTGGTGCTCTTCTGGTTAGCTTCACCGTCTATATCATCCCTGCCCTCGCTCACATGCTCACTTACCGATCTGCCTCCGCTCGTCAGAATGCGGCGGAGAAGCCACCGTTCTTCATGCCAAGCTGGACGGCGATGTACGTGTTGAACGCTTTCGTGGTAATTTGGGTTCTAATAGTCGGGTTCGGGTTTGGTGGATGGGCGAGTGTAACCAACTTTGTTCGTCAAGTCGACACTTTTGGTCTCTTTGCTAAGTGTTACCAATGTAAATCACCGGTTCCAGCTGGCGCGGCTCATGCCCCGGTCTCCGCTTTACACCACCGCCTTTGAGAG…	524	1	AT2G38120.1	AUX1 (AUXIN RESISTANT 1); amino acid transmembrane transporter/ transporter	Encodes an auxin influx transporter. AUX1 resides at the apical plasma membrane of protophloem cells and at highly dynamic subpopulations of Golgi apparatus and endosomes in all cell types. AUX1 action in the lateral root cap and/or epidermal cells infl	Identical to Auxin transporter protein 1 (AUX1) [Arabidopsis Thaliana] (GB:Q96247); similar to amino acid permease, putative [Arabidopsis thaliana] (TAIR:AT2G21050.1); similar to amino acid permease, putative [Arabidopsis thaliana] (TAIR:AT5G01240.1); si	94.66	131	7	1	1	393	357	485	4e-68	253
MLN2.Contig_1112	GATAGAGCGGGTTTGCATTTGGAGGAGTATGAAAGCAACTATGAGAATTACAGCAAACCATTTGAATGGACTTCAGAAGGAGCTCCAACATTTCATGTGCGTGAGTATGAGTCAAAGCTAGGGATGATAAATGAACCAGAAGAGGAGGCTGATGGAAGATTGGAATCCAGTTCAAGGGGTTCCTTCAGTGACCATGAAAGTTCAGAAGAGAGTGCTGTATTTCAGGAACCTCAAGATGCTAAATATGAGTATGAGATACCAATCGAAAGACAAGAGTTGAGCAACACCGTTTTTGACACAGAAAGGCATGAGGATAGATACGAGATAAATGAAACGTTTGAGCCAGCCGAGATTGTCGGAGATGAATCTGTTGCTTCTCTTGAGAAGGCGAGTGAAACA…	593	1	AT3G56410.2			similar to unknown protein [Arabidopsis thaliana] (TAIR:AT5G05190.1); similar to unknown protein [Arabidopsis thaliana] (TAIR:AT3G61670.1); similar to hypothetical protein Kpol_1058p4 [Vanderwaltozyma polyspora DSM 70294] (GB:XP_001645325.1)	54.63	227	71	5	1	585	869	1092	3e-49	191
MLN2.Contig_1113	AAGCCATCAAATCTTCACCATCCACCACAAACAACCAAACTCAAGAACAGTTACAAAGATGAACAAACTACTATGGCTTTACTCATAATTATCCATGTAATTAGTTTCAAATGTCTCCATAATATTGACTTTTCAGGTTTGTTGGTTAGTTAGTGTTCTTGCTGATTATTGTTTAAGGTTTCAGCAGTGGTATTAGGTCTTGGAATGTAGTCTTAGTTTGAAGATTGTTAAGATAATGACATTGGTAAGAAATAAAGTTTGTATAAGCAAATCTCAAGAGTGAATAAGCAACACGACCATGACTGTTTAGTGAAACCACCCTACCATCAA	330	1	AT5G27030.1	TPR3 (TOPLESS-RELATED 3)		similar to TPR1 (TOPLESS-RELATED 1) [Arabidopsis thaliana] (TAIR:AT1G80490.2); similar to TPR1 (TOPLESS-RELATED 1) [Arabidopsis thaliana] (TAIR:AT1G80490.1); similar to TPR2 (TOPLESS-RELATED 2) [Arabidopsis thaliana] (TAIR:AT3G16830.1); similar to Lissenc	81.25	16	3	0	12	59	1093	1108	0.34	30
MLN2.Contig_1114	GGGATTATGATGGACAACATAGAGAAGGTTCTGGACAGGGGAGAGAAGATAGAGCTTCTGGTTGACAAAAGCGAGAACCTACAGTTCCAAGCAGATAGCTTCCAGAGACAAGGGAGGCAGCTAAGAAGGAAGATGTGGATACAGAGCCTGCAGATGAAGCTGATGGTGGGAGGTGCGATTCTCTCCTTTATTCTTATCGTTTGGGTTGTTGCTTGTGGAGGTTTCAAATGTTCGTCATGATGTTTGGTTTCTTTTGTATCTGTTTGATCATCATTCATCACCTTGTTTACGCACGTAATACACATGCTCATGTTTGTAAATGTTGGAACTTGTAATAACATATCATCATCATTATTGCCACAAGCTATCTTTAATGTTN	379	1	AT3G54300.2	ATVAMP727 (Arabidopsis thaliana vesicle-associated membrane protein 727)	member of Synaptobrevin -like protein family	Identical to Vesicle-associated membrane protein 727 (VAMP727) [Arabidopsis Thaliana] (GB:Q9M376;GB:Q53XE0); similar to ATVAMP725 (Arabidopsis thaliana vesicle-associated membrane protein 725) [Arabidopsis thaliana] (TAIR:AT2G32670.1); similar to unnamed	93.42	76	5	0	1	228	162	237	4e-36	146
MLN2.Contig_1115	CTCCACCGATCTTTGTGATATGTAACCAATGGTCTCAAGCTCTGGACAGGATATCAGAGAAGAATTTATCGAGGCGATGCGTAGCTTCACCACAAGCGTGCTTCAGCTCTGGGAGCAATATCGGTTGGAGACGACGGCGATGGGGCAGGGGGATGCGGAGAAGAGAGGTAGGAACATGGACAGGGAGGAGCAGAGGATACATAGAGAGATTCAAGCGCTGGAGAAGAAGATGGTTCTGGTGGCGCCTGGTGATAGTCTTTCTTTGTCTGGGAACGTTGTCTACCAGAGTGATACTAGCAACGATAGCTTGCAAGGGAGTTTGCAGCGGATTTTTGAAGCTATGGAGAGGTTCACTGGTGAATCTGTGAGGGCTTATGATGATCTCTTGGTGCGCGCTGA…	609	1	AT4G35240.1			similar to unknown protein [Arabidopsis thaliana] (TAIR:AT2G17110.1); similar to unnamed protein product [Vitis vinifera] (GB:CAO47469.1); contains InterPro domain Protein of unknown function DUF632 (InterPro:IPR006867); contains InterPro domain Protein o	90.91	22	2	0	3	68	680	701	1e-58	47
MLN2.Contig_1116	GCTTCTCGTTGGCCGTCATGGTGAAGTACTCGCAAGAACCCGACAATTTCACCAAATCTTGCAAGGCGAGGGGAGCAGATCTCAGGGTACACTTTAAGAACACTAGGGAAACAGCGCATGCTATAAGGAAGCTACCCTTGATCAAGGCGAAGAGGTACTTGGAAGATGTGATAGCTCACAAGCAAGCTATCCCCTTCACACGTTTCTGCCGTGGTGTTGGGCGTACTGCTCAGGCGAAGAACAGGCATTCAAACGGTCAAGGTCGTTGGCCTGCCAAGTCTGCTCAGTTCGTTCTTGATCTTCTCAAGAATGCTGAGAGCAATGCTGAGGTCAAAGGGTTGGATGTTGATGCACTTTTCATTTCTCACATCCAAGTGAACCAAGCAGCAAAGCAGAGGC…	589	1	AT1G67430.1	60S ribosomal protein L17 (RPL17B)		Identical to 60S ribosomal protein L17-2 (RPL17B) [Arabidopsis Thaliana] (GB:P51413;GB:O64803); similar to 60S ribosomal protein L17 (RPL17A) [Arabidopsis thaliana] (TAIR:AT1G27400.1); similar to hypothetical protein [Vitis vinifera] (GB:CAN74145.1); simi	98.8	166	2	0	18	515	1	166	4e-84	306
MLN2.Contig_1117	CAAAAGGAAAAGTTCTAATGACCACACATCGAAGAGTAATATTGCTACAACAACCGTCCAACATAATGGGTCAAAGAAAATTCATCCCGGCCAAAGATGCGTGCTCTTTACAGTGGGACGTTCTATGGACTGATCTTGTATTTATGGAACTGACTGAGGCGAAAAAGGACCAGCCTAACTCCCCACCGTCACGGCTTATTCTCTATCTGAAATCAAAGCCAAATGATTCGAAGGAACAAGTCCGTGTTGTCAAATGCAGTCCCAACACGAAGCAGGCCCTTGATGTTTACTCAGCCATCGATACAACCATTAACTTGTACGGGCAAAATGATTCAAAGGCATTGGTGAAAAACAAAGTGACAAGGCCGTATTCCCCGATATCTGAGAGTTCTTGGGCTG…	626	1	AT1G48090.1	C2 domain-containing protein		similar to unknown protein [Arabidopsis thaliana] (TAIR:AT4G17140.1); similar to hypothetical protein OsI_007039 [Oryza sativa (indica cultivar-group)] (GB:EAY85806.1); similar to vacuolar protein sorting 13C protein-like [Oryza sativa (japonica cultivar-	83.45	145	24	0	3	437	3972	4116	4e-67	250
MLN2.Contig_1118	CACTGTGGCTCAGTATAACTCACCGTTCGAGTTCATTGGTCGTGTCAATGAGATTTGGTTACCCTTTCAAATGGATGATTAAGTGAAACTCTTTTTTTTTTTTAATTATGTAATAAATAAAAATCAGACAAGATGTTGATTATCATGAAAAGACAAAATGTTTCGGGTTAGGGAACTCGAGTTAAGTTACCCCTAAAGAGATTTTAAAGACAAAAAAAAAAAAAAAAAAAAAAAAAAAAAAAAAAAAAAAAAAAAAAAAAAAAAAAAAAAAAAAAAAAAAAAAAAAAAAAAAAGG	295	1	AT1G17100.1	SOUL heme-binding family protein		similar to SOUL heme-binding family protein [Arabidopsis thaliana] (TAIR:AT1G78450.1); similar to unnamed protein product [Vitis vinifera] (GB:CAO15487.1); similar to hypothetical protein [Vitis vinifera] (GB:CAN68405.1); contains InterPro domain SOUL hem	88	25	3	0	2	76	207	231	5e-08	52.8
MLN2.Contig_1119	CACAACAGCAATATGGTTATGCATCAAGTACTCCTGGTCAGCAAACTTACCCTCCATACAACTCTGCAGCACCATCCGATGGTTATAATAGTACACAAGCAGCAGCAGTTACCCCAGCTTATGAACAGCATGGTGGAACACCAGCTTCTGGGTGTGCAGCAAACTTCAGCTGGATATGGGCAAGCACCTCAAACCGGTGGTTATAGCTCATATCCCTCTACACAGCCGGCTTATGGTAATGCCCCGGCTCAGAGCAATGGAAACTATGGCTACGGCTCTCAGTATCCTAGCTATGGAGGTGGAAACGCATCAGCATATGCGGCACCTGTTGGCCAAACTGCTTATTCCCAGACTGCACCAGCCCAGGCGGGATATGATCAGTCTGCAACTCAGCCAGCG…	549	1	AT1G33680.1	nucleic acid binding		similar to KH domain-containing protein [Arabidopsis thaliana] (TAIR:AT4G10070.1); similar to unnamed protein product [Vitis vinifera] (GB:CAO16270.1); contains InterPro domain K Homology; (InterPro:IPR004087); contains InterPro domain K Homology, type 1;	81.91	94	16	1	151	429	670	763	1e-44	110
MLN2.Contig_112	CTCGAGAGAACGTCGCCTCTCATCTCCAGAAGTACAGGCTCTACCTCAAACGGATGCAGGGGTTGACGACCGAAGGTCCGTCTTCTTCCGACAAGCTCTTCTCCTCGACCCCTGTGCCTCCACACAGCTTCCAAGAAATCGGAGGCGGTAACGGCCAAGGGAACGGTAACGGCCAAGGGAACGTATCCGCGGGTGTGCCCTACGGAGGGCAGCCGATGATGCAGATGCCTGTCTATGCCCATCATATGGGTATGCAAGGCTATCATGATCCTTATCATCAGAACCTTCAGCATCATCATGGAGCTGGAGGGTTCGAAGCTAATCCATATATGATGCAGCAGAACAAGTTCGGGTCCATGGCGTCTTACCCTCCTGTTGGGGGTAGAAGTGCGCATGAGA…	518	1	AT3G46640.2	PCL1 (PHYTOCLOCK 1); DNA binding	Encodes a myb family transcription factor with a single Myb DNA-binding domain (type SHAQKYF) that is unique to plants and is essential for circadian rhythms, specifically for transcriptional regulation within the circadian clock. LUX is required for no	similar to myb family transcription factor [Arabidopsis thaliana] (TAIR:AT5G59570.1); similar to hypothetical protein [Vitis vinifera] (GB:CAN81044.1); similar to unnamed protein product [Vitis vinifera] (GB:CAO21613.1); contains InterPro domain Homeodoma	73.97	146	25	4	3	401	185	323	2e-51	197
MLN2.Contig_1120	CGGGAGATACTTCCGGTCTCCAGGAGAGGCTGAGAACCGAGGTGAGGAAGGTTTGCGGGTCCGGTTCGGGTCTGAATTTCAGGACGGTTAACGAAATGGAGCTGGTTAAGTCCGTGGTTTACGAAACGCTGCGTTTGAATCCGCCGGTTCCGTTGCAGTACGCACGTGCGAGGGATAATTTCAAGATAAGCTCGCACGACGCCGTTTACGAGGTCAAGAGAGGAGAGCTTCTCTGCGGTTACCAGCCGCTGGGTGATGAGAGACGCTAACATATTTGAGGATCCGGAGGAATTTAAACCGGATCGGTTTGTTGGTCAGACCGGGGCCAAGTTGCTTAATTATCTGTTCTGGTCTAATGGTCCACAAACCGGTACGCCGAGCGTGTCGAACAAACAGTGT…	607	1	AT4G15440.1	HPL1 (HYDROPEROXIDE LYASE 1); heme binding / iron ion binding / monooxygenase	Encodes a hydroperoxide lyase. Also a member of the CYP74B cytochrome p450 family. In the ecotype Columbia (Col) the gene contains a 10-nucleotide deletion in its first exon that causes it to code for a truncated protein that results in a non-functional	similar to AOS (ALLENE OXIDE SYNTHASE), hydro-lyase/ oxygen binding [Arabidopsis thaliana] (TAIR:AT5G42650.1); similar to hydroperoxide lyase [Citrus jambhiri] (GB:BAC55161.1); contains InterPro domain Cytochrome P450; (InterPro:IPR001128); contains Inter	84.34	83	13	0	3	251	215	297	2e-75	148
MLN2.Contig_1121	ACAGTCTCGGTGTCCACGTCCTCCCGTTTTTCAGATTCTACCGTGGCGCTCATGGTCGTGTCTGCAGCTTCAGCTGCACCAATGCTACGATCAAGAAGTTCAGAGATGCATTGGCAAAGCATAGTCCGGATAGGTGCAGCCTGGGACCGACCAAAGGGCTTGAAGAGAAGGAGCTTGTGGCACTTGCAGCCAACAAAGAACTCAACTTTAGTTACACACCGAGGGCTGTACCAGTTGAGGAAGAAGCAGCTTCAGTCCCCGCTTCAAACCCTGGTCTCCCTGTTGCTCATCCGTCGATGAAGGCCAATGATGGAAAGACATTGGTCTCCGCTGGGAGATGAGATATGGTTCTCTGTGAGCGAATAAACATTTCTCTGTACAGTTTGGGTGATGGTAGTA…	630	1	AT1G08570.4	thioredoxin family protein		Identical to Thioredoxin-like 1 [Arabidopsis Thaliana] (GB:O64654); similar to thioredoxin family protein [Arabidopsis thaliana] (TAIR:AT2G33270.1); similar to Thioredoxin domain 2; Thioredoxin fold [Medicago truncatula] (GB:ABN09825.1); contains InterPro	85.71	112	16	1	3	338	67	177	6e-50	193
MLN2.Contig_1122	GGAGAGAGGAGGAAGGCACTGATCCGACAGCAAGTAGGAACGGCCGCCTCCCTCATCATTTCTGGGGTTTCTAATCTCCAATGGCGAATCTGATGCAAAGATTCATCAGGAACCAGTCCTGTTTAAGAGCAATCCCGAGGCTTACCCCCAATCTCATACCACATCAGAAGCCTTGCATCATCGAGTCTCTCTCTGATCCATTTCCTCTCACTAATCCTGTGATTACCTTCTCCGGGTCCGGAATCAAACCCGATGAAGCTCTGCGGTTTTACCCTAGCTTCCCAATCGGATACGGGCTTAACCCGAGCGTGGTTCATGGTTCGGTGGTGGAGGAGAAAGAGAAGGAGGTGGTGATTCACGCGGATAGTGTGAAGAAGAAGAGGAAGAAGAAGATGAGCA…	616	1	AT5G63150.1			contains InterPro domain Protein of unknown function DUF1713, mitochondria (InterPro:IPR013177)	45.05	91	39	4	81	320	1	88	3e-13	72
MLN2.Contig_1123	GGCTGAGTTCTCCATCTCGTACAAGCCGGTTAAGCACGGTAGGCCTGGTGTTGGTGCTACCCACTCCTCCAGGTTCATCCCCCTCAAGTGAAGAAGAGCTTGTTATACTTTGGGGAATGCGTTCCATCTTTTTACATGGTCTCTTGCCTTTGGTTTCTCAAAGTTTGTTTGACCCTTTTTGTTGTTGCTTTATGATGAAAACTTCGTTAGATACTTTCTCAACTATTATGTGATCAGGATCTTAAAAATCAAATTGTTTTGAGTTTAATTTT	272	1	AT5G09510.2	40S ribosomal protein S15 (RPS15D)		Identical to 40S ribosomal protein S15-4 (RPS15D) [Arabidopsis Thaliana] (GB:Q9FY64); similar to RPS15 (CYTOSOLIC RIBOSOMAL PROTEIN S15), structural constituent of ribosome [Arabidopsis thaliana] (TAIR:AT1G04270.1); similar to ribosomal S15 protein [Retam	100	29	0	0	2	88	90	118	3e-11	63.5
MLN2.Contig_1124	GAGAGACGAGCCGTGTGTGAGAGAGAGATTTAAGGAGAGACTGAGGAGGATGGAGAATCTATGGCGAATCGCGACGGGTCAAGATCCGAACCGAGAAGATTACGAAGGGATCGAGTTCTGGTCCAACCCAGAGCGATCCGGTTGGCTAACCAAGCAGGGCGATTACATAAAGACCTGGCGCCGACGCTGGTTCGTGCTCAAGCGAGGGAAGCTCCTCTGGTTCAAGGACCAAGCCGCCGCCGAAACATGCGGATCCACGCCGCGCGGCGTGATCTCCGTGGGGGATTGTCTGACAGTCAAAGGAGCTGAGGACGTGGTGAACAAGCCTTTCGCCTTCGAGATTTCCAGCGGGAGCTACACCTTGTTCTTCGTGGCGGATAACGACAAGGAGAAAGAGGA…	564	1	AT2G29700.1	ATPH1 (ARABIDOPSIS THALIANA PLECKSTRIN HOMOLOGUE 1)	Encodes a protein containing one PH (pleckstrin homology) domain with a short N-terminal extension	Identical to Pleckstrin homology domain-containing protein 1 (PH1) [Arabidopsis Thaliana] (GB:Q9ST43;GB:O82386); similar to pleckstrin homology (PH) domain-containing protein [Arabidopsis thaliana] (TAIR:AT5G05710.1); similar to hypothetical protein [Vit	92.36	144	11	0	50	481	1	144	3e-78	287
MLN2.Contig_1125	GAGCTCTCCCATGAATCCCGAGAAGATTCATCATATTAAACACCTCTTCTTCTGATTCACATTATCGGAGACTCAGATCTGCAATCGAAGGAGAAGGAAGAAGCATGGACACTTTTACGGCGGAGGATCTGTCGACGATCGGCGGAATCGCCACCGTGTCGCTCCTCCATTCGTTTATTCCGACGCACTGGCTACCTTTCTCAATCGTCGGACGCGCGCAGAAATGGACGCTTTCCAGAACGCTCTTCGTCACTGCATTTGGAGCAGTTCTGCATGTCATATCCACTTCCCTTCTTGGTATAACAGCGATCACAATGGCGAATACCATCGCCGGTGAAGAGACTGTTCACAAGCTTGCTTCCCTTTTGCTTGTGATTCTCGGTGGAAGCTATGTCTTGC…	629	1	AT5G21070.1			similar to unnamed protein product [Vitis vinifera] (GB:CAO67366.1)	97.14	175	5	0	105	629	1	175	2e-90	328
MLN2.Contig_1126	TGAAGAACGGATCATTCGCTAACGTGTCGGAGATGAAACTGTCTGTTCACTCCGGAACACACGTGGATGCTCCAGGCCACTTCATTGACGAGTATTACGACGCTGGTTTCGATTGCGATTCGCTCGACCTCCAAACTCTAAACGGTCCTGCTTTGTTGGTTGATGTTCCGAGAGACAAGAACATAACTGCTGAGGTAATGGAATCACTTCATATTCCAAGGGGAGTTCGTCGTGTGCTCTTCAGAACATCCAACACTGACAAGCGGCTTATGTTTAAGAAAGAGTTCGATTCAAGCTTTTCTGGATTCATGACTGATGGGGCCAAGTGGTTGGTTGAGAACACAGACATCAAACTTGTTGGTCTTGATTATCTTTCCTTTGCTGCTTTTGACGAGTCAC…	583	1	AT4G34180.1	cyclase family protein		similar to cyclase family protein [Arabidopsis thaliana] (TAIR:AT1G44542.1); similar to unnamed protein product [Vitis vinifera] (GB:CAO47855.1); similar to hypothetical protein [Vitis vinifera] (GB:CAN60920.1); contains InterPro domain Putative cyclase (	92.93	184	13	0	3	554	72	255	2e-96	347
MLN2.Contig_1127	GCTTCTTAGGTTTGCTGGTGATTCCTACCTGGATAGCTACATCAGCACCATTGGTGTTGACTTTAAAATCCGCACCGTCGAACAAGATGGAAAGACCATCAAACTCCAGATTTGGGATACGGCAGGTCAAGAGCGTTTCAGAACCATCACTAGCAGTTACTACAGAGGAGCTCATGGCATCATTGTGACTTATGATGTAACAGACCAAGAAAGCTTCAACAATGTCAAGCAATGGCTGAATGAAATCGACCGCTACGCTAGTGAGAATGTGAACAAGCTACTGGTAGGGAACAAGTGTGATCTCACTTCACAGAAAGTTGTCTCCACTGAAACTGCCAAGGCTTTCGCAGATGAACTTGGGATCCCATTCCTGGAAACGAGTGCCAAGAATGCTACCAA…	600	1	AT4G17530.1	RAB1C; GTP binding		similar to AtRABD2b/AtRab1A (Arabidopsis Rab GTPase homolog D2b), GTP binding [Arabidopsis thaliana] (TAIR:AT5G47200.1); similar to GTP-binding protein, putative [Brassica oleracea] (GB:ABD65068.1); contains InterPro domain Ras GTPase; (InterPro:IPR001806	98.31	178	3	0	2	535	25	202	2e-96	347
MLN2.Contig_1128	GGTGCTCGTCGCTTACAAACGTTCAAAGAGGCAGCAACTCCGGAAACCACCTTCTCCTCCAGGCTATCCGATCATCGGAAACTTACACCAGCTGGGAGTGTTACCACATCAATCTCTATGGACTCTGTCAAAGAAGTATGGTCCTGTGATGCTTTTGAACCTTGGAAAAGTCCCCATGGTCGTACTTTCTTCTGTTGAAACCGCAAAACAAGCTCTAAGAGACCATGACATCCATTGCTGTAGCCGTCCTACAGCGGCGGGTAATTAATGTAAATCTCACAACACATAGTAAGGTTTTAAATTTTTACATCGTTGATGTTTTGTCTCTCCTTTAGGGCTTAGAGAACTGTCTTATAACAACCTGGACATAGCTTTCTCACCTTTTAGTGAGTACTGGAA…	576	1	AT3G26300.1	CYP71B34 (cytochrome P450, family 71, subfamily B, polypeptide 34); oxygen binding	putative cytochrome P450	Identical to Cytochrome P450 71B34 (CYP71B34) [Arabidopsis Thaliana] (GB:Q9LIP6); similar to CYP71B35 (cytochrome P450, family 71, subfamily B, polypeptide 35), oxygen binding [Arabidopsis thaliana] (TAIR:AT3G26310.1); similar to CYP71B37 (cytochrome P45	63.35	191	70	2	2	574	17	182	2e-61	231
MLN2.Contig_1129	TTTTCAAGAGGATGTCGACCGGGAAACCTACGCAAGAAGGCGATACGAGATTGGTGGTTGCCGCCACGACGGCGTCGGCATTAATGGAGGCAAAGAAAGCTGATAACGGAGGAGGATCTACATCTATCGTGGAGTATAAACCTCCGGTGATGCTCGAAGACGAAGAAGATCTAGAGATAAAGCTTATAAGAATCCTGGAGAACGTCCCCGTCCGCGTTAGCAACACCTCTGGTAGTTCCGCTGGTTCTGGATCCGGTGATTTCCACCAGTACCGGCAAATGAGGCGAAGAGAGCAAGACCGACTCACAAGGATGGATATTGACTACAACAAGCGTTTGAAAATGGCGGAATTTACTATAAGAAGAGAAGAGAAACTGAAAGCTGCAGAGGAAAAAACAT…	556	1	AT2G15270.1			similar to unnamed protein product [Vitis vinifera] (GB:CAO47864.1); contains InterPro domain Protein of unknown function DUF1168 (InterPro:IPR009548)	86.19	181	22	3	12	545	1	179	5e-39	157
MLN2.Contig_113	GTACACAAACAACTTGTTTGGTCTGGTTTCTTCGATCGATCATGGCTAACTCCGCGACGGCCGCTGAGCAACTTTGCTATATTCCTTGTAACTYCTGCAACATAGTTCTTGCGGTAAGTGTCCCATGCAGCAGTCTGTTCGACATCGTGACCGTCCGATGCGGCCACTGCACCAATCTGTGGTCTGTAAACATGGCAGCTGCTCTTCAGTCGCTTTCACGCCCTAATTTCCAGGTAACACCTTATGCAATGCCAGAGTATGGATCTTCCTCAAGAGGCAACACCAAAATTTCTTCCAGAATTTCAGCTCGTACCATTTCTGAGCAGAGAATTGTAAACCGTCCTCCGGAAAAGAGGCAGAGAGTACCTTCAGCCTACAACCAATTTATAAAAGAGGAAA…	674	2	AT2G26580.2	YAB5 (YABBY5); transcription factor		Identical to Axial regulator YABBY 5 (YAB5) [Arabidopsis Thaliana] (GB:Q8GW46;GB:O48725); similar to YAB2 (YABBY 2), transcription factor [Arabidopsis thaliana] (TAIR:AT1G08465.1); similar to unnamed protein product [Vitis vinifera] (GB:CAO65700.1); conta	90.85	164	15	0	42	533	1	164	9e-85	309
MLN2.Contig_1130	GTTGCTAGGTTTACAGGTGAGGTCGTGATTGCCGCCACGAGCTGCTGCTGCGATGGCGATGGCGATGGGGATGGTGATCCGTCGATTTCCAAGGCGTTCTTGGGTGGCGCTCTCTCAGAATTTTCCGTCGATTCTGCAGTCTGATGGGGATAAGTTGATCACAATGTTGCTTGATCAGTTTGTTGTGAGCCGTGCGCCTCTGAACTCGGCGAACTCTGAAACTTCCTCGGCTCAGAGCTCTCCCGTTAGCACGAATCGTTATCCCTCAGGAAAAACGGAGGAGTCTAGTCCTGGCGACGGGTCCACCGCGTCCTCTAAGAGTTCTTCGTCTGTTGTGGTGAATGGGGGTAGTATCGTGTGGAAGACTGGGGTTGATCAGCTGAGCTTTGGATTTAGTGA…	507	1	AT1G49340.1	ATPI4K ALPHA (Arabidopsis thaliana phosphatidylinositol 4-kinase alpha); inositol or phosphatidylinositol kinase	Encodes a phosphatidylinositol 4-kinase that is expressed in inflorescences and shoots.	similar to phosphatidylinositol 4-kinase, putative [Arabidopsis thaliana] (TAIR:AT1G51040.1); similar to unnamed protein product [Vitis vinifera] (GB:CAO47656.1); similar to hypothetical protein OsI_012841 [Oryza sativa (indica cultivar-group)] (GB:EAY916	70.59	34	10	1	1	102	122	152	2e-32	30.4
MLN2.Contig_1131	AAGCTCTCGCTCTCTCAGGCTTGGTTCAGAGACTTGTTGCTGAGATTTCCGATAAGCGGGCCGCGTCTGCACTCGCTGTTCACTGGAGGAAGACCTCATGCGACGGCTATGAAGCTGAGTGAATCAGGAGAGGTTTTGGAGGTGCTTGAGGATAGAGAAGGGAAGAGGTTGAGGTTTATAAGTGAAGTGGAGGAGAAAGATGGTAAGCTTTGGATTGGTTCTGTTCTTATGCCTTTTCTTGGTGTTTATGATTTGTAGTTTTCTACTCTGTTAAATACTTAAATGTCTGTGCTTCGTTATAATCTTAAATAGCGTGGATCATATTGTCACAAGTATGTCTATGTGACATGGTTGTGATAATAAACTATGTCTATGTTCACGTTAACTCTCTCCTTCTTA…	481	1	AT3G57030.1	strictosidine synthase family protein		similar to strictosidine synthase family protein [Arabidopsis thaliana] (TAIR:AT5G22020.1); similar to unnamed protein product [Vitis vinifera] (GB:CAO63060.1); contains InterPro domain Strictosidine synthase; (InterPro:IPR004141); contains InterPro domai	85.88	85	12	0	1	255	290	374	2e-29	125
MLN2.Contig_1132	GGATGTTATTACAATTTGTCAGATTGTAGTCTTGAGAAGTGGAGGCTCAGTTCAGACAAGAATAGCAATGAATTCTATGTTTCAGACAAAGAGATATGGAACTGAGAAAATGTACAACAACTATCAGTTCTAACGTCCAAATGTGCCTTTGTATATGTAAACCTAATGCAATTTACTGTAAATAAGTATTTGTATAGTCTGGAAGGAAAACAAAATAAATTTCAGTGAGG	230	1	AT1G58180.3	carbonic anhydrase family protein / carbonate dehydratase family protein		similar to carbonic anhydrase family protein / carbonate dehydratase family protein [Arabidopsis thaliana] (TAIR:AT4G33580.1); similar to unnamed protein product [Vitis vinifera] (GB:CAO70725.1); contains InterPro domain Carbonic anhydrase, prokaryotic-li	79.41	34	7	0	1	102	206	239	3e-12	66.6
MLN2.Contig_1133	ATCATGGAAGGAGTCATTGTGAGGAGAGTTATACCGTCTGACAACAGTTGTCTCTTCAACGCAATCGGTTATGTCATGGACAAGGACAAGAAGAAAGCTCCTGAGCTAAGACAGGTGATAGCTGCAGCAGTTGCAAGCGACAAGGAGAAATATAACGAAGCATTTCTAGGGAAGCCTAATGAAGAATACTGTACTTGGATTCTCAATCCAGAGAAGTGGGGAGGTGCGATTGAGCTTTCGATATTGGCAGATTATTATGGTCGAGAGATTGGAGCTTATGATATTCAAACTAGTCGATGTGACTTGTATGGACAGACCAAAAACTACAGCGAAAGAGTTATGCTGATCTATGACGGTCTTCACTATGATGCTCTCGCTTTGTCTCCATTTGAAGATGCT…	535	1	AT1G50670.1	OTU-like cysteine protease family protein		similar to hypothetical protein OsI_005843 [Oryza sativa (indica cultivar-group)] (GB:EAY84610.1); contains InterPro domain Ovarian tumour, otubain (InterPro:IPR003323)	93.22	177	12	0	4	534	1	177	7e-94	339
MLN2.Contig_1134	AAGGAGATGACAAGTACCTTATTGCTACTGCTGAGCAACCTCTTTGTGCATACCATATAGATGAATGGATCCCTCCGAACGACCTTCCCATAAGATATGCTGGTTACTCGTCCTGCTTTAGAAAGGAGGCTGGTTCCCACGGAAGAGACACACTTGGCATCTTCCGTGTTCACCAGTTTGAGAAGATTGAACAGTTCTGCATCACTAGTCCTAACGATAATGAGTCGTGGAAAATGCTTGACGAGATGATGCAGAACTCGAAAGATTTTTACCAAGAGCTAAAGCTTCCATACCGAATCGTTACCATCGTCTCGGGAGCATTGAACGATGCAGCTGCTAAGAAGTACGACTTGGAAGCTTGGTTTCCTTCGTCGGAGACTTACAGAGAGCTCGTGTCGT…	619	1	AT5G27470.1	seryl-tRNA synthetase / serine--tRNA ligase		Identical to Seryl-tRNA synthetase [Arabidopsis Thaliana] (GB:Q39230); similar to AtSRS (OVULE ABORTION 7), serine-tRNA ligase [Arabidopsis thaliana] (TAIR:AT1G11870.2); similar to AtSRS (OVULE ABORTION 7), serine-tRNA ligase [Arabidopsis thaliana] (TAIR	91.22	205	18	0	3	617	230	434	2e-111	397
MLN2.Contig_1135	GAAACTAAAAAAACTTCAAATGAATGTCTGAAGGCGAAGTTTCTTCCATTCGAAGAAGATGGCTCTTCTCTGTTTCAATCCTCTCGCTCCCCTCTCTTCTCAAAGGCTTCAACTTTCGTCCTTCGCTTCACCAGTTCTCAGCCTTAAACCTAACACCGTCGAGTCTAAGAACAGAGCCTCTCTCAGTGCTTACAACTTGAGCAGTGGTTATAAAAGAGCTGTGATTGTGAAGGCAGCTGCTTCTGGAGTTGACGGAGCTGAGCCCGAGAGCAATGAGGAACCACCTAAGACTGTCGTCGCTGCTGTTCCAGTTGATAAACTACCGTTGGAATCAAAAGAAGCTAAAGAGAAGCTACTCCTGGAACAGAGGATGAAGATGAAGCTGGCCAAGAAGATTAG…	585	1	AT3G56910.1	PSRP5 (PLASTID-SPECIFIC 50S RIBOSOMAL PROTEIN 5)		Identical to Plastid-specific 50S ribosomal protein 5, chloroplast precursor (PSRP5) [Arabidopsis Thaliana] (GB:Q9LER7;GB:Q94B31); contains domain PD031914 (PD031914)	79.33	150	24	3	59	487	1	148	9e-32	133
MLN2.Contig_1136	GGTCATAGAAGGTTGGGTTTGGAGACGGCAATCTTCAAGTCTGCTTTTCGAACGACGACATCGTCGTGTAGAGGTTCTCTCTTGCCGTCGAATATGCGTTTGTCTGGTTTGGTGGTTTGGTCCGTGCTTGGATTCTTTGGTTGGTTTGTGTCGGGTTGAGTTGTCGGAAGCTGCAGGGGATCCGTAGCTTTTAGGTTTGAGGACGCCTATCTTTCGGTAGCTTGCGGCAACCGGTTTCTTTTTCTCTGGTTTTTCTTGCTCGCTTGGTCCTGGTCCGTCTCCCTGTTTAGCTAGCTTCTATGACAGCTTCTCTACTCGGTTTTCTTTTCAATGTTGCTTATTGTTGTTAGTTTGTGTGTTTAGTTTCGTTTTTGTATTATGCTACTAGTGGTGTTTTGT…	447	1	AT5G11890.1			similar to unknown protein [Arabidopsis thaliana] (TAIR:AT1G17620.1); similar to unknown [Populus trichocarpa] (GB:ABK93997.1); contains InterPro domain Harpin-induced 1 (InterPro:IPR010847)	47.83	23	12	0	47	115	63	85	0.46	30.4
MLN2.Contig_1137	GGATTGAGAGAGAGAGATCCGAATCTGATCAGAGAATTGTAGATTGATCGAAGAAGATGAACACTGACATCACTGCCTTGGAGAAGCCCCAGTACCCCGTCGTTGATCGGAATCCTCCATTCACAAAAGTCGTCGGAAACTTCAGCGTCCTCGATTACCTCCGTTTCTCCACCATCACCGGCGTTTCCGTCACCGTCGGCTATCTATCAGGGATTAAGCCTGGGATCAAGGGACCGTCAATGGTGACTGGAGGGCTGATCGGACTCATGGGTGGGTTCATGTATGCGTATCAGAACTCGGCGGGGAGGCTCATGGGTTTCTTCCCCAACGAAGGCGAGGTCGCTAGCTACCAGAAGCGTGGTGGGTTCTCCAAATGAGTCCAGGGTTTTTGCTGGATCT…	561	1	AT4G16450.1			similar to unknown [Populus trichocarpa] (GB:ABK93272.1); contains domain PD104546 (PD104546)	95.28	106	5	0	57	374	1	106	2e-54	208
MLN2.Contig_1138	GATGATAGAAGAAACAAAGCGTAGTATCCACGATGCTCTGTGTGTGGCAAGGAATCTCATCCGCAATAAGTCAACTGTATATGGAGGTGGTGCAGCTGAAATCGCATGCTCACTTGCGGTTGATGCAGCTGCTGATAAATACCCTGGCGTCGAGCAGTACGCAATAAGGGCATTTGCAGAAGCGTTGGACTCTGTACCTATGGCTCTTGCAGAGAACAGTGGATTACAGCCCATTGAGACACTCTCTGCGGTTAAATCTCAGCAACTTAAGGAGAACATTCCTTTCTATGGGATAGATTGCAATGACGTGGGAACAAACGATATGAGGGAGCAAAATGTGTTTGAAACATTGATCGGGAAGCAGCAGCAGATTTTGCTTGCAACTCAAGTCGTTAAGAT…	587	1	AT1G24510.2	T-complex protein 1 epsilon subunit, putative / TCP-1-epsilon, putative / chaperonin, putative		Identical to T-complex protein 1 subunit epsilon [Arabidopsis Thaliana] (GB:O04450); similar to chaperonin, putative [Arabidopsis thaliana] (TAIR:AT3G18190.1); similar to T complex protein (GB:2206327A); similar to unnamed protein product [Vitis vinifera	98.63	146	2	0	2	439	314	459	1e-76	282
MLN2.Contig_1139	CGAGCAATCCGACATGGGGTTGGAGCTGGTTAGAGAGATGGATGGCTGGTCCTGGTCGGCCATTGGAAGAACCAAACAATAACTTAACTCAACCAAACACACCATCATCCGCAAGAGGTGGCACTACTCCAAGAAACAAAAACAAAAACAAAAACAGTTTCTTCTCTCCTCCAACTCCCTCAAGACTAAACCAATCCTCCAGAAAATCCAAAGACGAGGACGACGCCAAAAGCACGATCTCGGTCCTGTCCGAGAGGAACCGAAGACACAGCATCGGTGGTTCGTCAGTCAAAGATGACGAGAGTCTGGCTGGATCACAGGCTCTACCGAGCTATATGGTTACCACTAAATCAGCTAGAGCTAGGCTGAAGCCGCAGAGTCCGTTAAGTGGTGGTACCA…	571	1	no significant hit
MLN2.Contig_114	GARGYTGCACACAATTTTSCTCTGATCTCACGGAGACGACGACGGAAGAATGCAGTTCTTCGGTGGATCGGAGATAAATCCGTCGCCACAGGTTCCGACGGCGAGTGGAAACAACGCGCACATGATGTACGTTTTCAACCGTAACGGCGTCTGTCTCCTCTACAAAGARTGGAACAGGCCTCTTCWCACGCTCAACCCTCAGCAAGAYCACAAGCTCATGTTCGGTCTTCTCTTCTCCCTCAAATCWCTCACCGCCAARATGGATCCCGTCAATGCGGATRAGGGGAATCTAGGTGTTCCACAGTTRCCAGGACAAGGGTGCTCTTTCCATAGTTTTCGAACTAATACTTACAAGCTTAGCTTCATGGAGACTCCCTCTGGTATTAAGATTATCTTRGT…	639	2	AT1G51160.2	synbindin, putative		similar to synbindin, putative [Arabidopsis thaliana] (TAIR:AT5G02280.1); similar to hypothetical protein [Vitis vinifera] (GB:CAN66358.1); contains InterPro domain Longin-like; (InterPro:IPR011012); contains InterPro domain Sybindin-like protein; (InterP	96.45	169	6	0	50	556	1	169	2e-93	338
MLN2.Contig_1140	GTTGATGCTGTTCCAGCAAATGGAGTCCCTCCTTGGAACTGGAGAGAGACTCCTGGAAACGGTGGTGATGCTCATGGACAGCCTTTTGGTGGGAGGGTCATAACTGTGAAATTTGGCGACTATACAAGAAGAATCGGCGTTGATGGCACTGCTGAAGCAATCAAAGAGACAATCAGGTCTGCTTTTAGCCTAAGAACCAGGCGGGCCTTTTGGTTAGAAGATGAAGATCAGGTTGTTCGTTGTCTTGACCGAGACATGCCCTTAGGGAACTACCTACTCCATGTCGATGGTGGAGTGGCCATTAGGGTTTGCCATTACGATGAATCCAACCAGTTACCAGTCCATACAGAAGAGAAGATCTTCTACACGGAAGAAGATTACCGCGATTTTCTGGCTAGA…	569	1	AT1G13450.1	DNA binding protein GT-1		similar to DNA-binding protein GT-1-related [Arabidopsis thaliana] (TAIR:AT3G25990.1); similar to DNA binding protein GT-1 [Brassica rapa] (GB:ABV89646.1); contains InterPro domain SANT, DNA-binding; (InterPro:IPR001005)	87.73	163	20	0	1	489	244	406	6e-85	309
MLN2.Contig_1141	AGCTCGAGAAGGCCTACATCCGCGACCTCATCTCCCCTTCCGACTACGACACCGAGTGTCAAAAACTCATCGTCCACTTCAAGACCCTCTCCGCATCCCTCAAGGACCTTGTCCCCAACATCGAGAGGTTCGCCGAGACCTACAAGATGGACTGCTCAGCTGCTGTCTACCGCCTCGTGACCTCCGGCGTTCCTGCTACCGTGGAGCATCGTGCTGCTGCGGTGGCGTCTACTTCCAGCTCTGCTTCCGTTGTGGCTGAGTGTGTGCAGAATTTTATCACTTCGATGGATTCGTTGAAGCTTAATATGGTGGCTGTAGACCAGGTGTATCCGTTTCTGTCTGATCTCTCGGCTTCGCTTAGTAAGCTGAGTATTTTGGCGCCGGATTTTGAAGGGAAGG…	556	1	AT4G21560.3	vacuolar protein sorting-associated protein 28 family protein / VPS28 family protein		Identical to Vacuolar protein sorting-associated protein 28 homolog 2 [Arabidopsis Thaliana] (GB:O65421); similar to vacuolar protein sorting-associated protein 28 family protein / VPS28 family protein [Arabidopsis thaliana] (TAIR:AT4G05000.2); similar to	94.41	179	10	0	3	539	31	209	2e-75	278
MLN2.Contig_1142	GGTTCTTCTTCTTCTCCGCCTCCTAATTACGCGAAGAAGAAGGCGAAAACCTCGCCAAGTCTGAGATACGCAAAGATCGTATCGTGGGTTTTGGATATGGCGTCGAAGCGGATCTTGAAGGAGCTGAAGGATCTGCAGAAGGATCCACCCACCTCTTGTAGCGCAGAACCTGTCGCTGAAGACATGTTTCATTGGCAGGCAACGATAATGGGTCCTTCAGACAGTCCTTACGCTGGTGGTGTTTTCCTTGTTACCATTCATTTCCCTCCTGATTACCCTTTCAAACCTCCTAAGGTTGCCTTTAGGACGAAGGTGTTCCATCCCAACATCAACAGCAACGGAAGTATTTGCCTTGACATCTTGAAGGAGCAATGGAGTCCTGCTCTCACCATCTCCAAG…	614	1	AT4G27960.2	UBC9 (UBIQUITIN CONJUGATING ENZYME 9); ubiquitin-protein ligase	ubiquitin conjugating enzyme	Identical to SUMO-conjugating enzyme UBC9 (UBC9) [Arabidopsis Thaliana] (GB:P35132;GB:Q42014;GB:Q8RXQ0;GB:Q9FPH9); similar to UBC10 (UBIQUITIN-CONJUGATING ENZYME 10), ubiquitin-protein ligase [Arabidopsis thaliana] (TAIR:AT5G53300.2); similar to UBC10 (U	96.03	151	6	0	88	540	28	178	1e-84	309
MLN2.Contig_1143	GGCCAACAAACAAATTCTCTTAAGAGCTGTTCAACCTCACGAGAATCTCGGAATCTCCGGCGACAAAATTCAATCAAAGCGGAGGAGGAGGAGGATGTGTTGTGGAAGGATATGCATGCTGTGCACGTGTTTGATTCTGGTGGTGATCGCGATCGGGTTCCTATTCGGATTCGGAGTTTTCAAGGATGGTTTCCACAAGATCCAACAGTCCGTCCATCTCGAATGCGATCAGAGATCCGGCTGCGGAGGTGGACGTCGCGGTTACGGTTTCCCCGGTAATAACTAGCTGTGTCATCTGATATGATCAATTCTTATTCGAACCAGCAGCGTTTGCTTTTGGAATTCGAATTTGGATATATATCGATTCTTACTTAGGTTTGGTTTTTTTTTTTTTTTTTA…	527	1	AT3G13275.1			similar to unnamed protein product [Vitis vinifera] (GB:CAO45215.1)	88.57	35	4	0	125	229	11	45	2e-13	72
MLN2.Contig_1144	TACCCTCCTTGGCGTCCTCGGACTCACCTTCTCCTGTGTATTTCCCGAGCTGAGCCAGCGAATTGGCTTTGGCACGGGTCAAGAGTGTCTCCTGAGCCGCCTTCACGTTCTCTTCTCTGCCTGCCCATGTCTTCAAGCAAGTGTTCTGCAACGCACGTGCGTAGGAGAAGGACACGTGCCATGGGTTCGGTCCTTGGTTCATTGCGTTCAGGTTCAAAGTCGCCTCCAACTCGGACTGTCCACCGGACAGGAACTGCGTACGTAGATGAAATAACATCAAAATCACTGGTTCAAGTCTTGTTTACTAGTTTCTTGATCTGCAAGGAAAAAAAAACATACCATGATTCCGGGAACAGCAGGAGGGATTCTGTTGCGAAGGAGCTTGAGAGTGTAGGAAGC…	565	1	AT3G14570.1	ATGSL04 (GLUCAN SYNTHASE-LIKE 4); 1,3-beta-glucan synthase/ transferase, transferring glycosyl groups	encodes a protein similar to callose synthase	similar to ATGSL03 (GLUCAN SYNTHASE-LIKE 3), 1,3-beta-glucan synthase/ transferase, transferring glycosyl groups [Arabidopsis thaliana] (TAIR:AT2G31960.1); similar to CALS1 (CALLOSE SYNTHASE 1), transferase, transferring glycosyl groups [Arabidopsis thali	43.59	39	22	0	131	247	1568	1606	2.9	28.5
MLN2.Contig_1145	GACTCCGTCTCCGACGAAAGGCGTTTTGATTAATTTGGAAGACAGGACGGGGAAGGTGTGGCGGTTCCGTTACTCGTACTGGAACAGCAGTCAAAGTTACGTGTTGACCAAGGGCTGGAGCCGGTTCGTTAAGGAGAAGAATCTCAGAGCCGGCGATGTGGTTTGCTTCGAGAGGTCGACCGGTCCAGACCGGCAGTTGTATATTGACTGGAAAGTTCAGTCCGGTAAGGAGGAAATTACACCGGTTCAGAGTGTGGTTAGGCTATTCGGGGTCAACATTTTTAATGCGACGACTAGCGCTAAACCAAACGACGTCGCAGTAGAGTGCGGTGGCAAGAAGAGATCTCGGGAAGTTGATTTGTTTGCGTTGGGGTGTTCCAAGAAGCAGACGATGATGAT…	539	1	AT1G25560.1	AP2 domain-containing transcription factor, putative		Identical to RAV1-like ethylene-responsive transcription factor At1g25560 [Arabidopsis Thaliana] (GB:Q9C6M5); similar to RAV2 (REGULATOR OF THE ATPASE OF THE VACUOLAR MEMBRANE), DNA binding / transcription factor [Arabidopsis thaliana] (TAIR:AT1G68840.1);	84.73	131	20	2	5	397	234	358	3e-59	224
MLN2.Contig_1146	GGACTTTTCAAAGGTATCGCCGGACTTCTAGGGCTTGGCCGCGGCAAATTCTCATTTCCTTCGCAGACAGCGATGACGTACAATAATATATTCTCCTACTGCCTCCCTTCCTCCCCAGAGTACACTGGCCATCTCACTTTCGGATCAGCTGGATTATCTAATGCCGTCAAGTACACTTCGATTTCCTCAGTCGTCCATGGGAGTGCATCCTTTTATGGCCTCGATATCGTAGGTATCTCCGTCGCCGGCAAGGAACTGGAGATTCCTTTAACCGTGTTCTCCACTCCCGGTGCTATAATCGACTCCGGTACCGTGATTACTTACCTCCCTTCACAGGCCTACGCGGCACTTCGAGCCGCGTTCAAGGAAAAGATGTCGAATTATAAGACTACGGTGGGA…	494	1	AT5G10770.1	chloroplast nucleoid DNA-binding protein, putative		similar to aspartyl protease family protein [Arabidopsis thaliana] (TAIR:AT5G10760.1); similar to unnamed protein product [Vitis vinifera] (GB:CAO44388.1); contains InterPro domain Peptidase aspartic, catalytic; (InterPro:IPR009007); contains InterPro dom	69.51	164	50	1	1	492	253	415	1e-60	228
MLN2.Contig_1147	ACGAACACATAACATTCATCTCGTTTCCCTATAGAGAATCTAGGCATGACGTCTCCTGAAAAAACTGGCTCAAGCAGTGTTTCCAAGAAAGTTTCGGAGATCTGGGAGCGAATGAACGAAGGAGTACCAAACAAGCGATTCAATTTCGTCTCAAAGACTTCAACCTCTTCGCCTCCCGCTAAAAAAACAGCTAACAGCAACTGGAAAAGTTATCTTGGTATTGACGCGAAGAAGAGGGACAAAGCTGTACAAAAGGAAGACAGCGTTTTGGATAGTAGCTGTAGCGAGGAGGCTAAACGCATTGCTGCTGCCGCCTTAGCTGCTGTCAGAAACGCAACCGCAACCGCTGCAGCTGCTTCGAGCCGTGGCAAGATTGAGATAACTGAGGTCAAGGACTTT…	527	1	AT5G30490.2			similar to unknown [Populus trichocarpa] (GB:ABK95758.1); contains InterPro domain Bucentaur or craniofacial development (InterPro:IPR011421)	68.07	166	45	3	52	525	7	168	1e-25	112
MLN2.Contig_1148	TCAAGGCTAGCGAACGCGTCGTCTGCCATTTCTACCGCGAGAATTGGCCCTGTAAAGTGATGGATAAGCACTTGGGTATATTGGCAAAGCAGCACATTGGGACGCGTTTTGTGAAGACCCAAGCTGAGAAAAGTCCCTTCTTGGCTGAGAGGCTCAAGATTGTTGTTCTTCCCACTCTTGCCCTCATCAAGAACACTAAAGTGGATGATTACGTGGTTGGGTTCAATGAGCTGGGAGGGAAAGACGATTTCAGCACTGAGGATCTGGAAGAGGGATTAGCTAGAGCTCAAGTCATCCATTACGAGGGAGAATCATCTCATAAACCAAAGTCTACCACACAAACCAAGAGGAGCGTAAGGCAGAGTGCTAGATCAGATTCTGACTCTGAATAAATCCAAA…	538	1	AT3G25580.1	thioredoxin-related		similar to TXND9 (THIOREDOXIN DOMAIN-CONTAINING PROTEIN 9 HOMOLOG) [Arabidopsis thaliana] (TAIR:AT2G18990.1); similar to unknown [Populus trichocarpa] (GB:ABK93948.1); contains InterPro domain Thioredoxin-like fold (InterPro:IPR012336); contains InterPro	90.7	129	12	0	3	389	82	210	8e-63	236
MLN2.Contig_1149	GGCTGCGACAGAGCTAGAGAGAGAGAGAGATAGCGATGGGAGTGGAGAAGCAAGTCATCAGACCCGGCACCGGACCCAAACCCACTCCGGGTCAAACAGTCACCGTCCACTGTACCGGATTCGGGAAAGGTGGTGATCTATCCCAGCAGTTCTGGAGTACAAAGGACGCTGGGCAAGAACCTTTCTCCTTCCAAATCGGTAAAGGTGATGTCATCAAAGGATGGGATGAAGGCGTTATGGGGATGCAAATTGGAGAGGTTGCTCGCTTGCGGTGCTCACCGGATTACGCGTATGGTGCTGGTGGGTTTCCAGCATGGGGAATCCAACCTAACTCGGTTCTTGACTTTGAAATCGAAGTACTCAGCGTGAAGTGATCATGATGATCTCTCTAGCTCAAAA…	622	1	AT5G64350.1	FKBP12 (FK506-binding protein 12 kD); FK506 binding / peptidyl-prolyl cis-trans isomerase		Identical to Peptidyl-prolyl isomerase FKBP12 (FKBP12) [Arabidopsis Thaliana] (GB:Q8LGG0;GB:O04263); similar to immunophilin-related / FKBP-type peptidyl-prolyl cis-trans isomerase-related [Arabidopsis thaliana] (TAIR:AT4G25340.1); similar to ROF1 (ROTAM	91.07	112	10	0	36	371	1	112	1e-47	186
MLN2.Contig_115	GTTTGGCATCTCCTGGTTACCTCAACGGCAGTCTTGCCGGGGACAATGGGTTTGACCCATTGGGACTTGCAGAGGATCCAGAGAACTTGAAGTGGTTCATCCAGGCAGAGCTTGTCAACGGACGGTGGGCCATGCTTGGCGTCGCAGGGATGCTTTTGCCGGAAGTTTTCACCAAGATCGGAATCATCAACGTTCCTGAGTGGTATGATGCTGGAAAAGAGCAGTATTTTGCATCATCGYCGACATTGTTCGTGATCGAATTCATATTGTTTCATTACGTTGAGATCAGACGAYGGCAAGACATTAAGAACCCAGGAAGTGTGAACCAAGACCCTATCTTCAAGCAATACAGCTTGCCTCCAAATGAAGTTGGTTACCCTGGAGGAATCTTTAACCCGC…	776	3	AT3G47470.1	LHCA4 (Photosystem I light harvesting complex gene 4); chlorophyll binding	Encodes a chlorophyll a/b-binding protein that is more similar to the PSI Cab proteins than the PSII cab proteins. The predicted protein is about 20 amino acids shorter than most known Cab proteins.	Identical to Chlorophyll a-b binding protein 4, chloroplast precursor (CAB4) [Arabidopsis Thaliana] (GB:P27521); similar to LHCA2 (Photosystem I light harvesting complex gene 2), chlorophyll binding [Arabidopsis thaliana] (TAIR:AT3G61470.1); similar to c	93.72	191	12	0	3	575	61	251	1e-103	372
MLN2.Contig_1150	GACCTAGTTGACGCAACGGTAGGACAAAATCTCAACGAGGTGAAGCACCAACACTAGGAACAAGAGAGGAAGCCTTGAATCTGAAGCAAAAGCTTAGGTTGTTTTGGTCTTTTGTTTATTATCGTTCATATAGTAATAATGAATGTGGATTACATTTTTCTTGGTAGGGGTTTCCTTAGCTTTATTTTGTTAATGCTTTTGGAATTGAATTTCTTTTGTTTTCTGCTTTGGATTTGAACATAAGGGAATGGTAATGCATAGTTCCTGGTTGTTAAAAAAAAAAAAAAAAAAAAAAAAAAAAAAAAAAAAAAAAAAAAAAAAAAAAAAAAAAAAAAAAAAAAAAAAAAAAAACC	353	1	AT1G71280.1	DEAD/DEAH box helicase, putative		Identical to Putative DEAD-box ATP-dependent RNA helicase 55 (RH55) [Arabidopsis Thaliana] (GB:Q9FVV4); similar to DEAD/DEAH box helicase, putative [Arabidopsis thaliana] (TAIR:AT1G71370.1); similar to unnamed protein product [Vitis vinifera] (GB:CAO4143	43.33	30	17	1	81	170	325	352	3.8	26.6
MLN2.Contig_1151	GACATTACGTAGAGCTTCTTCTCTCCATCGAATCCAGCAACGACGACGATGATGATCTCTCGTCGATTAGCTTCCAGATTCCTTAGACCCACGTCTTCCTCATCCCTCATCACCTCCCTTCACCATCTCCACTCTTCTTCTCCCATAAGAAACCATTTGATCCACAGATCAGAACAACTTCAAGAGCTGGGTCTCTTTAGATCCTTCTCTGCTTTCATCACCAATCCCAACACCGAGAAGCTCCGATCTCAGACACGGTCAACGAGGTACTTCTCAACACCAAGCCAAGAGGTCAGTCCGAAACCAGAGGAGGAGTCCAAGATGAAGCACCAGGAGATCGAAGGCCCGACGGTGGAGCGCGACGTGTCGGCTTTAGGTAACGAGACGAGAAAAGTGTTC…	594	1	AT3G12650.1			similar to unnamed protein product [Vitis vinifera] (GB:CAO15069.1)	70.9	189	48	4	49	594	1	184	5e-51	197
MLN2.Contig_1152	GGTTGGCCTCAACAGAACAACATACCTGCGTTGCATCTCCCTGGTAGCAATGTGCAGTTGAGCCGTCTGAGATCTTCTCTGAACGCTAGAGATATTATTCCTTCTGAGCAACTTAGCATGATGCAAGAGTTTGAAATGCAGCGTATGTCAAGTCCACGCTTTATGAATCATCATCACTCCGCTCGTCCCAAGACGCTCCTGACCCCTTCGAATCTAGAGGAGCTTTTCTCAGCCGAGGTTGCATCATCCCCACGCTTCTCTGATCAACTTGGCGTCTCGTCTGTTCTATCGCCTTCCCACAAATCAGCTCTTCTTAACCAGCTGCAGAGTAATAAGCAGCAGAGCATGCTTTCTCCTATCAAGACGAATCTAATGTCTTCTCCAAAGAATGTGGAGCAT…	540	1	AT5G12850.1	zinc finger (CCCH-type) family protein		similar to zinc finger (CCCH-type) family protein [Arabidopsis thaliana] (TAIR:AT2G41900.1); similar to Zinc finger, CCCH-type [Medicago truncatula] (GB:ABN08215.1); similar to hypothetical protein [Vitis vinifera] (GB:CAN74402.1); similar to unnamed prot	80.73	192	25	8	1	540	421	605	7e-65	243
MLN2.Contig_1153	AGCCCGGATTCGCCTGTCCGCCGAGTGGCTAGAAAGGGCGAGGAGAGAGTTGGAGGAGGTGGTGGAGAGAGACCCGGGTCGGGTCATGGAGTATTCGCAGGTGGTCGACGAGCTGATGGATCTTCTCAAGGATATGGAGGTTTATGTGGATCAGTGCGAAAAGGACAAGGTTAAGGGTTACCTTAGATCTTGCAATCGGTTGCTTGCCCGTGTCAGGAAAATGGAAGCTCGGATTCTCAATGCCCTCCAAGAGTTTCACGATGATGAACCAAGAGGAGGAGACAACTAGCTTTAGCAAGGAGGACCCTCTCACTCTTGTCTTGTCTCTTGTCATTTCATTTGCTTTCTTTTTTTTGAGAGTTATGCTTTGCTTCTATGAATGAATCTCTGTAGGATGGT…	440	1	AT1G01990.1			similar to chloroplast lumen common family protein [Arabidopsis thaliana] (TAIR:AT2G37400.1)	83.87	93	15	0	2	280	147	239	2e-30	127
MLN2.Contig_1154	CACGGGGATAACACTCTTGCAGAGGATTGGAACCGGTATTTTCTTCGCCTTTGTTAGCTTGATAGTCTCAGGTTTCGTCGAGGAACGGAGGAGAACGTTCGCGCTGACTAAACCAACACTTGGTATGGCTCCAAGGAAGGGAGAAATCTCCTCAATGTCAGCTATGTGGCTAATCCCACAACTCGCCCTTGCGGGTATAGCCGAGGCGTTTGGAGCTATTGGACAGATGGAGTTTTACTACAAGCAATTCCCTGAGAACATGAGGAGTTTTGCTGGTTCGATCTTCTATGTAGGAGCAGGAGTTTCGAGCTACCTCGGTAGCTTCTTGATTGCAATGGTTCACAGGACGACGCAGAACTCGGCTGGTGGTAATTGGTTGGCTGAGGATTTGAACAAAGG…	538	1	AT5G62680.1	proton-dependent oligopeptide transport (POT) family protein		similar to proton-dependent oligopeptide transport (POT) family protein [Arabidopsis thaliana] (TAIR:AT1G18880.1); similar to proton-dependent oligopeptide transport (POT) family protein [Arabidopsis thaliana] (TAIR:AT3G47960.1); similar to unnamed protei	93.71	175	11	0	2	526	430	604	4e-92	333
MLN2.Contig_1155	AGGCGGTGGAAACTACCAAGCTTGAGTACGGTAGGGGCAGAGGGAATTTCCGGTGGAGCGGTGAAATGCGTAGGGACCGTCTATTCGAAGCAGTCAACAGGAGACGAAGATTCGGAGAGAAATGAGGTTGTTCGATCCATGGCCCGTGTTCTTCAAGAGGGAATGGAAACGTACCTGGCCGTTCCTCACCGGTTTCGCCGTAACCGGCGTCCTCATCACCAAGCTCACCGCTGGATTCACTGAGGAAGACGCCAAGAACTCAAAGTTCGTCCAACAACACAGGCGGTGATCACTTGTTTATGAAAACTATTGCGCCTGTGCTTCCGCTTTCAAACCCTATTCTAATAACATCAAAAGAGAAGTGTTCTCTCTTGTCCTTTCATCATTTTGTTTTGTACT…	476	1	AT5G59613.1			similar to unknown protein [Arabidopsis thaliana] (TAIR:AT3G46430.1); similar to mitochondrial ATP synthase 6 KD subunit [Oryza sativa (japonica cultivar-group)] (GB:BAB21526.1)	96.36	55	2	0	122	286	1	55	7e-27	116
MLN2.Contig_1156	AGCTTGCTGTCTTTGTGTCGGGAGGTGGTTCGAATTTCAAGAAGATTCACGAGGGATGCCTTGGTGGTTCAGTTCAAGGGGATCTTGTCTTATTGGTCACTAACAAGAAAGATTGTGGAGGTGCTGACTATGCAAGAAGCAATGGGATTCCTGTCTTACTATTCCCAAAACCGAAACGAGAATCATCCGATGGACTCTCTCCTACAGAGCTTGTGGATGTTCTTAGGGAGTATGGTGTAGACTTTGTTCTGTTAGCTGGATATTTGAAACTTATACCGGCTGAGCTCGTCAAAGCTTTTCCTAAACGGATTCTGAATATCCATCCTGCTTTACTTCCGGCTTTTGGAGGTAAAGGGCTTTATGGTATGAGAGTGCATAAAGCTGTTCTAGCCTCAGGAG…	637	1	AT1G31220.1	phosphoribosylglycinamide formyltransferase	N10-formyltetrahydrofolate-dependent phosphoribosylglycinamide formyltransferase that catalyzes the conversion of phosphoribosyl glycineamide to phosphoribosyl N-formylglycineamide	Identical to Phosphoribosylglycinamide formyltransferase, chloroplast precursor (PUR3) [Arabidopsis Thaliana] (GB:P52422); similar to formyltetrahydrofolate deformylase, putative [Arabidopsis thaliana] (TAIR:AT4G17360.1); similar to Phosphoribosylglycina	84.54	207	32	0	3	623	80	286	1e-97	352
MLN2.Contig_1157	GGAGCAAAACGGCTTTGGGGAGCTGTTAACTTCATCCTTGCTATTTGCTTGGCCATGACTGTTGTGGTGACTAAACAGGCGGAGAATCACCGGCGAGATCACGGCGGTGCTAAAACAGGACCGCCTGGTAACGTTACCGCTGGTGCTTTAACTCTCTTTGCTGTTCTCGGTATTCCCCAAGCGATTACGTTCAGTATTCCTTTTGCACTAGCTTCCATATTTTCAACCAATTCTGGTGCCGGCCAAGGACTTTCTCTAGGTGTTCTGAATCTGGCTATTGTCGTCCCACTGATGGTGGTATCTGTGGGAGGTGGACCATTCGATGAACTATTCCATGGTGGAAACATTCCGGCATTTGCGCTAGGAGCAATTGCGGCCGCGGTGAGTGGCATATTGGCT…	596	1	AT1G22710.1	SUC2 (SUCROSE-PROTON SYMPORTER 2); carbohydrate transmembrane transporter/ sucrose transmembrane transporter/ sucrose:hydrogen symporter/ sugar:hydrogen ion symporter	Encodes for a high-affinity transporter essential for phloem loading and long-distance transport. A major sucrose transporter, AtSUC2 can also transport a wide range of physiological and synthetic glucose conjugates with both &#945;- or &#946;-linkage.	Identical to Sucrose transport protein SUC2 (SUC2) [Arabidopsis Thaliana] (GB:Q39231;GB:O80550;GB:Q8RWQ6); similar to ATSUC8 (SUCROSE-PROTON SYMPORTER 8), carbohydrate transmembrane transporter/ sucrose:hydrogen symporter/ sugar:hydrogen ion symporter [A	93.55	155	10	1	1	465	359	512	1e-66	248
MLN2.Contig_1158	GGTCTTCTCCATTACTTCAAGAGAACACATCGCGTGCCTTCCTTCCATCAACCATGGCTTACTCAGCTCCCATATCTCCATCCCTATCCTTCTTCAAAAACCCCCAACTCACCAGATTCTCGTTCCCTTTCTCCCCACTTTACTCTCGCCCTAGGATTCAGAATCCAAGTCTGCTCACCAAGAACAAGACGTGGTCTTCGTCCGTGGTGGTGGCGGCGACGGCGGCGGAGAAGCAGAAGAAGAGATACCCTGGAGAATCGAAAGGGTTTGTGGAGGAGATGAGGTTTGTGGCGATGAGACTTCACACGAAGGAGCAGGCGCCCAAGGAAGGTGAGAAAGAGACAAAAGCTCCCGAGGAACGTCCTGTCGCTAAATGGGAACCGACTGTTGAAGGTTACT…	598	1	AT2G26670.1	HY1 (HEME OXYGENASE 1)	Encodes a plastid heme oxygenase necessary for phytochrome chromophore biosynthesis and for coupling the expression of some nuclear genes to the functional state of the chloroplast.	similar to HO3 (HEME OXYGENASE 3), heme oxygenase (decyclizing) [Arabidopsis thaliana] (TAIR:AT1G69720.1); similar to heme oxygenase 1 [Lycopersicon esculentum] (GB:AAK63012.1); contains InterPro domain Haem oxygenase-like; (InterPro:IPR016053); contains	78.32	143	28	3	54	473	1	141	2e-48	188
MLN2.Contig_1159	ATACTGAAGTACCAACAGTCACAACTGACAGCTCCTCCAACCCGTGGCCTCGGAACTCCTGCAGCTGGAACAAGTGCGGCTTTGCCTCCAGGATTGGCCACCATGGATAGATACGCAGGGGAGGATGAAGGAGGAGGGCCACCTATGGATTCATCAAGAAGGAGAACGTCAGGTGCTCTTGACAACTTGAGAGCCCCAATGATGCATAGCTCGTCGGTGTTCGCGCAATCAGCAGGATCATCAAGGAGATTAACATCGGAGGAGCTACAGAGGTCCCGTACGGGCAGCGGATTAAGAAACACAGCGGTGGTTACAACGTCGGAAGGGAAGAGGTCTTCTTCCACCCGAAAACATTACGACTCTGCGATCAAAGGCATCGAGACTCTTCAAGTCTCCAGC…	501	1	AT5G57015.1	CKL12 (Casein Kinase I-like 12); casein kinase I/ kinase		similar to CK1 (casein kinase 1-like protein 1), casein kinase I/ kinase [Arabidopsis thaliana] (TAIR:AT4G26100.1); similar to unnamed protein product [Vitis vinifera] (GB:CAO65329.1); contains InterPro domain Protein kinase, core; (InterPro:IPR000719); c	79.86	144	24	1	1	417	292	435	3e-52	201
MLN2.Contig_116	CTGCAGCGACACGTGGCACCACGAGCCTTGTGTGACAAGCCATGGCCTCGTTGATCACATCGTTGAAGCACGGGTTATCCTCTGCTAAAGCCCACAGATCCTTACCGTGCACGGTATCAAACGGTGGTGGATGTGAACCGTTGGCCGGAGAAGAGACGACTGAACTCAGCCTTAACCATGGAGCTAGTAGTTGGGGACTTGTTTCGAAGAGAACGAAAGGAGCCAGAGACTTGCCGTCACATTTTGTGATCATCATACGGCGAGAGAGTGGCGTGTTAGTGTAGCCTGTGGCTAGACCATCTTTTGTGGGGACTTCTTTAAAGACTCCTTGGTGCACAAGAAATCTCATTATACGGTGGAGATGCGATGGAGAGGCAGAGACTGCACCGGAGAGTTCGG…	643	2	no significant hit
MLN2.Contig_1160	GACCATGGAGTTGTGGCGGTCGGATACGGAACAGAGAATGGCAAAGACTATTGGATTGTGAAAAACTCATGGGGAACAAGTTGGGGAGAGAGCGGATACATAAGGATGGAGCGCAACATTGCGTCTTCGGCAGGAAAATGTGGAATCGCTGTTGAGCCTTCTTATCCGATCAAGAATGGCCAAAACCCACCAAACCCTGGACCTTCACCTCCATCTCCCGTTACGCCTCCGACCCAATGTGACAGTTACTACACATGTCCTGAGAGCAACACTTGTTGTTGTCTTTTTGATTATGGAAAGTATTGTCTTGCTTGGGGATGTTGCCCACTAGAAGCAGCCACATGTTGTGATGACAACTATAGTTGCTGCCCTCACGAGTACCCCGTTTGTGACCTTGAT…	557	1	AT1G47128.1	RD21 (RESPONSIVE TO DEHYDRATION 21); cysteine-type peptidase	cysteine proteinase precursor-like protein/ dehydration stress-responsive gene (RD21)	Identical to Cysteine proteinase RD21a precursor (RD21A) [Arabidopsis Thaliana] (GB:P43297); similar to cysteine proteinase, putative / thiol protease, putative [Arabidopsis thaliana] (TAIR:AT5G43060.1); similar to unknown [Populus trichocarpa] (GB:ABK95	90.42	167	16	0	1	501	296	462	3e-85	310
MLN2.Contig_1161	CTGGAAGAGTGACGACCAAAGTCGACATCTTCAGTCTTGGGGTTATACTTATGGAGCTGATCACTGGACGTAAAGCTCTTGATGAGACGCAACCTGAGGACAGCGTCCATCTAGTCACATGGTTCCGTCGTGTAGCAGCAAGCAAAGAGAGAGACGAAAACGCCTTCAAAAACGCTATAGACCCAAACATCAAGCTGGACGAAGAGACCTTAGCCAGTGTTCAAAAAGTTTGGGAGCTTGCTGGTCATTGCTGTGCACGTGAGCCTTACCAAAGACCTGACATGTCTCACATTGTTAACGTTCCTTCTTCGCTCACAGTCCAATGGAAACCCACTGAGGTTGATCCTGATGACCTCTACGGTATAGACTACGATCTTCCGCTTCCGCAGGCGGTTAAGA…	544	1	AT2G01820.1	leucine-rich repeat protein kinase, putative		similar to leucine-rich repeat family protein / protein kinase family protein [Arabidopsis thaliana] (TAIR:AT1G24650.1); similar to TMK1 (TRANSMEMBRANE KINASE 1) [Arabidopsis thaliana] (TAIR:AT1G66150.1); similar to unnamed protein product [Vitis vinifera	90	180	18	1	3	542	765	942	1e-79	292
MLN2.Contig_1162	CGGTGAGACAGTTTTTGACAAAGAGACAGAACCGAGCTGTGCCGTTAAAGCTGGCTGTTAAGCAAGCGTTGGATGTTGCTAGAGGCATGGCGTATGTACATGAGCGGAACTTTATACACCGTGATCTGAAGTCGGATAACCTCCTCATATCAGCTGATCGCTCCATCAAGATTGCTGATTTTGGCGTTGCGAGAATCGAAGTTCAAACCGAAGGGATGACTCCAGAGACAGGGACTTACAGATGGATGGCCCCAGAGATGATTCAGCATAGACCCTACACTCAGAAAGTAGACGTCTATAGTTTTGGAATCGTGCTGTGGGAGTTGATAACGGGCCTTTTACCGTTCCAGAACATGACTGCGGTTCAAGCTGCTTTCGCGGTGGTGAACCGAGGAGTGC…	628	1	AT4G31170.3	protein kinase family protein		similar to serine/threonine/tyrosine kinase, putative [Arabidopsis thaliana] (TAIR:AT2G24360.1); similar to flag-tagged protein kinase domain of putative mitogen-activated protein kinase kinase kinase [synthetic construct] (GB:ABK06448.1); similar to flag	95.41	196	9	0	3	590	217	412	7e-107	382
MLN2.Contig_1163	GCAGCTACCAGAGGTTTACATGGGAGCTAAAGAATGGGGCTCTCTCCCTTACAACAGAGTAGCTTCCGTGGCGATGAAGTCTTACAAGGAGATATTCTTAAACCACGACGCGGAGAGGTTTCGGAAGTATCTAGCCGACGCGAGAGAAGGGAAGACCAAGATCGCCGCCGGCGCCGTCTTACCTCACGAGATCATCGGCGAGCTAGACGGAGGAGACGGCGGACAAGTCGCCGAGCTTCAGTGGAAACGAATGGTGGACGATTTAAAGAAGAAAGGCTCCTTAACGAGCTGCATCGCGATCTCCGACGTCTCGGGGTCCATGACCGGGGATCCGATGGAGGTCTCCGTCGCCTTGGGGCTTCTCATCTCGGAGCTGACGGAGGAGCCGTGGAGAGGGAA…	577	1	AT5G13210.1			similar to unknown protein [Arabidopsis thaliana] (TAIR:AT3G24780.1); similar to unknown protein [Arabidopsis thaliana] (TAIR:AT5G43400.1); similar to unnamed protein product [Vitis vinifera] (GB:CAO70061.1); contains InterPro domain von Willebrand factor	77.6	192	43	0	2	577	358	549	3e-77	284
MLN2.Contig_1164	GGCATGAGGACAAGAATCGCGCTGAGGGAGAAAGGTGTCGACTTCGAGTACAGGGACGAGAATCTGAGGGAGAAGAGCCCTCTGCTCCTCCAGATGAACCCGGTTCACAAGAAGATTCCGGTCCTCATCCACAACGGTAAACCGGTCTGCGAATCAGCCATCCAGGTTCAGTACATCGACGAGGTGTGGCCTCACAAGAACCCTATCCTCCCTTCTGATCCTTACCAGAGAGCTCAGGCTAGGTTCTGGGTTGATTTCATCGACAAGAAGATGTACGAGGCACAGAGGAAGGTGTATGCGACCAAGGGTGAGGAACAAGAGACAGGCAAGAAGGAGTTTATTGAGATTCTCAAGACTCTTGAAACCGAGCTTGGAGACAAGCCTTACTTTGGTGGGGAT…	564	1	AT1G78380.1	ATGSTU19 (GLUTATHIONE TRANSFERASE 8); glutathione transferase	Encodes a glutathione transferase that is a member of Tau GST gene family. Expression is induced by drought stress, oxidative stress, and high doses of auxin and cytokinin. naming convention according to Wagner et al. (2002) The expression of this gene is	similar to ATGSTU25 (Arabidopsis thaliana Glutathione S-transferase (class tau) 25), glutathione transferase [Arabidopsis thaliana] (TAIR:AT1G17180.1); similar to glutathione transferase [Carica papaya] (GB:CAA04391.1); contains InterPro domain Thioredoxi	86.7	188	25	0	1	564	16	203	1e-88	322
MLN2.Contig_1165	CTCCTCAAGGCTTTAGACAAAGAGCTCTCTAGCGACTTTGAGAGAGCTGTGATGTTGTGGATGCTTGATCCAGCGGAGAGAGATGCTTATCTGGCCAAAGAATCCACCAAAATGTTCACCAAGAACAACTGGGTTCTCGTCGAGATCGCTTGCACAAGGTCTGCTGTTGAGCTTTTCAAGGTCAAGCAAGCTTACCAAGCTCGCTACAAGAAATCGCTCGAGGAAGATGTTGCTCAACACACTTCCGGTGACCTTCGCAAGCTATTGCTTCCTCTGGTTAGCACTTTCAGGTACGAAGGAGACGATGTGAACATGATGCTCGCAAGATCCGAAGCCAAGTTGCTTCACGAGAAGGTCTCAGAGAAAGCTTTCAACGATGATGACTTCATCAGAATCTTG…	553	1	no significant hit
MLN2.Contig_1166	AGGCGTTGCAAGTTGGATCTTTGTTGAAAGGTGGTGACTTTGGTGCGATCAAGGGAGCTTTGGTCAAGGCCTTTGAGAGTGTGGATCAGAGTTTGCTTAAATGGCTAGAAACAAAAGGTGAAGAAGATGAGTCTGGTTCAACGGCTACTGTGATGCTCATTAGAAATGATGTTTCCTACTTTGCACATATTGGGGATTCTTGCGCTGTCTTATCTCGATCTGGACAAATCGAGGAGTTGACTGATTCTCATCGTCCATATGGAAGCAGTAAAGCAGCTGTTCAGGAAATGAAGAGGATCAAAGATGCAGGTGGATGGATTGTCAATGGAAGGATTTGTGGAGACGTAGCTGTATCTCGTGCTTTTGGTGACATCCGGTTCAAGACAAAGAAGCATGAGA…	567	1	AT4G27800.3	protein phosphatase 2C PPH1 / PP2C PPH1 (PPH1)		Identical to Protein phosphatase 2C PPH1 (PPH1) [Arabidopsis Thaliana] (GB:P49599;GB:Q9M0J6;GB:Q9STP6); similar to protein phosphatase 2C, putative / PP2C, putative [Arabidopsis thaliana] (TAIR:AT4G31860.1); similar to unnamed protein product [Vitis vini	87.83	189	22	1	3	566	115	303	1e-93	338
MLN2.Contig_1167	TGATGGACCGCGTAAACTCCGGTACCGGAACGCCGCTGATGCCTACCCGGACTTTCGAGACGTACATTTTCGCGCTATTCAATGAAAATCTCAAACCGGGACCGGTTAGCGAGCGTAATTTCGGTCTTTTCCGGTCCGATTTAACACCGGTTTACGACATTGGTATCCTCCGGCCGACGGTTAGAACATCGGATCCACCGGAGAACAACCGGCGATCACCGGTCGGAGGATCTTCGGGGAAGCGGTGGTGCGTTACAAAGGCTGGCGCGGAGACAGAGGCTTTACAGAGGAACATAGATTACGTATGTGGATTGGGCTTAGACTGTGAGCCCATTATCGAAGGTGGGCCTTGTTTTCTCCCCAACACAGTGGAAGCCCATTCAGCGTACGCCATGAACT…	638	1	AT5G24318.1	catalytic/ cation binding / hydrolase, hydrolyzing O-glycosyl compounds		similar to glycosyl hydrolase family 17 protein / beta-1,3-glucanase, putative [Arabidopsis thaliana] (TAIR:AT3G55430.1); similar to unnamed protein product [Vitis vinifera] (GB:CAO48626.1); contains InterPro domain Glycoside hydrolase, family 17; (InterP	83.03	165	28	1	9	503	294	457	2e-78	288
MLN2.Contig_1168	GGGTTGGTCGGAGGAATCGAAAGACGAGATAGAGTCTCCTCGTTAAGTGCGGTGGGGATGGGATTGGGTAGTCGAAAGCGATCTCTTTTGATATGCAACTCTGCCGCTAACGCGAAGTGCAGTGAAAGTCAAGGTCAAACACAGACCGTTACTCGGGAGTCTCCGACAATAACACAAGCTCCTGTCCACTCTAAGGAGAAATCACCAAGCCTGGATGATGGAGGAGACGGGTTCCCACCGCGAGATGATGGAGATGGAGGTGGAGGAGGAGGCGGTGGTGGCAACTGGTCTGGTGGCTTCTTCTTCTTTGGTTTTCTCGCTTTCTTGGGTTTACTGAAGGACAAAGAGGGTGAGGAGGATTATCGAGGGGGCAGAAGACGATGATGATGTGTATGCTTC…	551	1	AT1G56200.2	EMB1303 (EMBRYO DEFECTIVE 1303)		similar to unknown protein [Arabidopsis thaliana] (TAIR:AT1G30475.2); similar to unknown protein [Arabidopsis thaliana] (TAIR:AT1G30475.3); similar to unknown protein [Arabidopsis thaliana] (TAIR:AT1G30475.1)	77.78	72	14	2	1	210	25	94	3e-23	104
MLN2.Contig_1169	GATCATCACCATCACGACCACGAGCAAGGCCACAAGAAACCAGAAGGCGGCGGTGGTGACACGTCATGGGTAGGACCGGACGGGAGGGTGTACCATAGCCACGATGGACTCGCACCGCACTCACACGAACCCATCTACTCTCCTGGATACTTCAGCCGCCGAGCTCCTCCTCTTAACGACCGTAACTTCTCCGAGAGAGCTTTCACCGTCGGTATTGGCGGTCCTGTTGGCACCGGGAAAACAGCATTGATGCTTGCTCTTTGTAGAGTCTTGAGGGACAAGTACAGTCTTGCTGCTGTGACAAATGATATATTCACAAAAGAGGACGGTGAGTTTCTGGTGAAGCATGGGGCTCTTCCAGAAGAAAGGATCAGAGCCGTTGAAACCGGTGGATGTCCC…	576	1	AT2G34470.1	UREG (urease accessory protein G); metal ion binding / nucleotide binding	Encodes a urease accessory protein which is essential for the activation of plant urease.	similar to urease accessory protein G [Solanum tuberosum] (GB:CAC33001.1); contains InterPro domain Urease accessory protein UreG; (InterPro:IPR004400); contains InterPro domain [NiFe]-hydrogenase/urease maturation factor, Ni(2+)-binding GTPase; (InterPro	91.89	185	15	0	22	576	14	198	2e-97	351
MLN2.Contig_117	GTTSGTCACATCGTGTTTGATCCTTATCAACTTGCAGATATTTTCACAGGCCCAAAGATCTAAGATCCGAGTTACAAAGCAAAATGGCGATGGTTTCAGGAAGACGTTCTACGCTAAACCCCAACGCGCCTCTCTTTGTCCCAGCAGCCGTTAGACAAGTGGAAGATTTCTCTCCGGAGTGGTGGCAGTTGGTGACGACCTCCACTTGGTACCACGACTACTGGATCAGCCAGCACCAAGGAGCTGACGGATTCTACGACAACGGAGAGAGTGGTGAAGTCGATGTAGCTGATCTTCTTCCGGAGTCGTTTGATTTCGATGACATTGAAGATGTCTTTGAATCCGTGTTTGATCATCAAGGTTACGGTGGATATGTTGGACAACAGATGTATCATGCAC…	570	3	AT2G41430.2	ERD15 (EARLY RESPONSIVE TO DEHYDRATION 15)	Encodes hydrophilic protein lacking Cys residues that is expressed in response to drought stress, light stress and treatment with plant-growth-promoting rhizobacteria (Paenibacillus polymyxa), possibly revealing a connection between responses to biotic an	similar to unknown protein [Arabidopsis thaliana] (TAIR:AT4G14270.2); similar to unknown protein [Arabidopsis thaliana] (TAIR:AT4G14270.1); similar to ERD15 protein [Brassica rapa] (GB:ABV89651.1)	77.84	167	27	5	84	554	1	163	3e-66	247
MLN2.Contig_1170	GGGCTCCCCATTCGACCCGTCTTGTAACACGGACCAAGGAGTCTGACATGTGTGCGAGTCAACGGGTGAGTAAACCCGTAAGGCGCAAGAAAGCTTGACTGGAGCGTGAACGGAGACGAGCTACAAGAGCTCAGGAACTCTACTTCTTTCCGTCTCAGAGCTGGTAGCATGGAATCAAGAACCCCCACGGAGCTTGAGGAACCAGATGTCTCGTGGGTGGAGCCGCTGGTGAAAGAGCCACAGGAGACAAGGGTGGCTCCGGTTTGGATGGAGCAATCATACATGGAGACAGAACAGACCGTTGCTTGAATCAAAGTTTTGAAACATCATTAACAAGAAGCAGAAGAAGAAGAAGAAAAAAAGAGAAGTCTAAACAAATTTCTGAGGTCGTTGCTAATC…	525	1	AT5G58620.1	zinc finger (CCCH-type) family protein		similar to CZF1/ZFAR1 [Arabidopsis thaliana] (TAIR:AT2G40140.2); similar to CZF1/ZFAR1, transcription factor [Arabidopsis thaliana] (TAIR:AT2G40140.1); similar to hypothetical protein [Vitis vinifera] (GB:CAN78824.1); contains InterPro domain Zinc finger,	86.67	75	7	1	91	306	533	607	5e-31	130
MLN2.Contig_1171	AGGCCAAGGTTTTGGAGAAGGCCTGGAAAATCCCCAAAAACTGGAAGAATTCCACCCACCTCCCGAAGTTTAATTTCCTTAACTGGTTAACCCCTTCAATTCTAACTTAATAAAATCTTTGGTTAATGTTTAACCCATGGGTTACTCCCCCCTTAAATTAATTAATGTTAAATTCTAATAATCCATGTTTTTGGGTCCGGGTAAGGAACCGGGGGTGGGGTTAACCAATTAATAACTTCCCCGTTGGGTTTTAATGGCAATTAACTTCTATTCTCCCTGATTCTGCGAAAAAAAAGGCCGCCTCG	305	1	no significant hit
MLN2.Contig_1172	GCTCAGAGGAAATAAAATATCTTGAATCTTAGAGAAGAAGGAAAAGAGAAGAGAAGATGACGACCGAGAAGAAAGAGATGGAAGTGGTGAAAGGTCTAGACTTGGAGAGGTACATGGGCCGTTGGTACGAGATTGCTTCTCTCCCTTCCAGGTTCCAGCCCAAGAACGGTGCAGACACTCGCGCCACCTACACCCTTAACCCCGACGGCACCGTTAAAGTCTTGAACGAGACGTGGGACGGAGGCAAGAGAGGTTTCATCCAAGGCTCAGCTTTCAAAACCGATCCTAAGAGCGATGAGGCCAAGTTCAAAGTCAGGTTCTACGTTCCTCCTTTCCTCCCTATCACTCCCGTTACTGGAGATTACTGGGTGCTGTATATCGATCCTGAGTACCAGCATG…	580	1	AT5G58070.1	lipocalin, putative		similar to temperature-induced lipocalin [Brassica napus] (GB:ABB02398.1); contains InterPro domain Lipocalin-like (InterPro:IPR013208); contains InterPro domain Lipocalin, bacterial and plant; (InterPro:IPR002446); contains InterPro domain Calycin-like (	85.19	162	24	0	93	578	12	173	1e-82	302
MLN2.Contig_1173	GATTGAGATTCTGAACCCTGATAATAAACCCGGGAGGATAACTATAATCACGAGAATGGGTGCAGAGAATATGCGTGTGAAACTTCCTCATCTAATAAGAGCGGTTCGTGGGGCTGGACAGGTTGTGACTTGGGTTAGTGATCCTATGCAGGGTAACACCATCAAGGCTCCTTGCGGTCTCAAGACACGTCCGTTTGACTCCATCCTGGCTGAAGTGAGAGCGTTCTTCGACGTGCACGACCAAGAAGGAAGTCATCCAGGAGGTATTCACTTGGAGATGACAGGTCAGAACGTGACCGAGTGTATCGGTGGGTCCCGCACAGTGACCTTTGACGACTTAGGTTCGCGTTACCACACGCACTGTGACCCACGTCTCAATGCGTCGCAGTCCCTTGAGCT…	636	1	AT1G22410.1	2-dehydro-3-deoxyphosphoheptonate aldolase, putative / 3-deoxy-D-arabino-heptulosonate 7-phosphate synthase, putative / DAHP synthetase, putative		similar to DHS2 (3-DEOXY-D-ARABINO-HEPTULOSONATE 7-PHOSPHATE SYNTHASE), 3-deoxy-7-phosphoheptulonate synthase [Arabidopsis thaliana] (TAIR:AT4G33510.1); similar to DHS1 (3-DEOXY-D-ARABINO-HEPTULOSONATE 7-PHOSPHATE SYNTHASE 1), 3-deoxy-7-phosphoheptulonate	93.51	154	10	0	2	463	374	527	2e-81	298
MLN2.Contig_1174	CCATGGGAGATGGGCAATGTTGGGAGCATTGGGTTGCATAACCCCTGAAGTTCTTCAGAAATGGGTCCGTGTGGACTTCAAAGAGCCGGTCTGGTTCAAAGCCGGTTCACAAATCTTCTCTGAAGGCGGTTTGGACTACTTAGGCAACCCAAACCTTGTCCACGCCCAAAGCATTTTAGCCGTCCTTGGCTTCCAAGTTATCCTAATGGGATTAGTTGAAGGTTTCCGCATCAACGGTCTTGATGGTGTTGGTGAAGGCAATGACTTGTACCCGGGCGGGCAATACTTTGACCCGCTGGGTCTCGCGGATGACCCGGTTACTTTCGCCGAGCTTAAGGTGAAGGAAATCAAGAATGGAAGGTTGGCTATGTTCTCAATGTTTGGCTTCTTTGTTCAAGC…	557	1	AT5G54270.1	LHCB3 (LIGHT-HARVESTING CHLOROPHYLL BINDING PROTEIN 3)	Lhcb3 protein is a component of the main light harvesting chlorophyll a/b-protein complex of Photosystem II (LHC II).	similar to LHCB2.1 (Photosystem II light harvesting complex gene 2.1), chlorophyll binding [Arabidopsis thaliana] (TAIR:AT2G05100.1); similar to LHCII type III chlorophyll a/b binding protein [Vigna radiata] (GB:AAD27877.1); contains InterPro domain Chlor	98.8	167	2	0	2	502	99	265	3e-95	343
MLN2.Contig_1175	TCATGCAGTACTCTCCAGTTCCAATGTCCCCGCTGGAGTCACTGGCCTCCTCTGCGGTCAGAACGGCTAACTCGGCTAGAGCCACGCTCATCATGGTCCTAACCAGGGGAGGAAGCACGGCGAGGCTTGTGGCTAAGTACAGACCAGGGATGCCTATTTTATCTGTCGTTGTTCCCGAGATGAAAACCGACTTCTTTGACTGGTCTTGCAGCGACGAATCGCCGGCGAGGCACAGCCTCATCTTCCGTGGGTTGATCCCGGTGCTGTACGCAGGGTCTGCAAGAGCCTCGCATGATGAGTCGACGGAAGAAGCTATTGAGTTTGCGACTCAGCATGGGAAAGAGAAGCAGCTGTGTAAGACTGGAGACTCTGTTGTTGCTCTGCTCCGTGTTGGTAATG…	605	1	AT5G56350.1	pyruvate kinase, putative		similar to pyruvate kinase, putative [Arabidopsis thaliana] (TAIR:AT5G63680.1); similar to pyruvate kinase, putative [Arabidopsis thaliana] (TAIR:AT4G26390.1); similar to pyruvate kinase, putative [Arabidopsis thaliana] (TAIR:AT5G08570.1); similar to pyru	96.48	142	5	0	3	428	357	498	1e-72	268
MLN2.Contig_1176	GGTGGCATTGTCTAATTGTATCCACTGAAAAAGCGCGATAAAAAGCGAGTCACCGACCAAGCAAGTCGCCGGTGAAAATCCGATGCAGTCCACTGACAACGGCGGCGGAAAAGGAGGAGGTGGTGAGGTGAGTCGAGGTGGGTTGTCTCGGATCCGTTCAGCTCCGGCGAATTGGATTGATACCCTACTCCAGGATGATGAAGAAGATGATTTGAAACCTGACCTCTGTTTAACTGAGCTTCTCACCGGAAACTCGTCCGGACTAACGAGTCGTGACTTGTTTGAGTTCCCGAGTGCTGTTGACCAGGGATTGTACACTAACCAAGGTGGGTTTCACCGCCAGAACAGCTCTCCTGCGAATTTTCTCGGTGGCTCTGCTGCTGGGAGTGATGGGTTTTT…	608	1	AT1G35460.1	basic helix-loop-helix (bHLH) family protein		similar to basic helix-loop-helix (bHLH) family protein [Arabidopsis thaliana] (TAIR:AT4G09180.1); similar to unnamed protein product [Vitis vinifera] (GB:CAO64707.1); contains InterPro domain Basic helix-loop-helix dimerisation region bHLH; (InterPro:IPR	70.24	168	37	7	143	607	26	191	3e-37	151
MLN2.Contig_1177	CGCCTCCGATCGGATAAACAAAAGAGGAGAAACAGTGGAGGATAAGATAAAGAAGCTTGATGTTGATCTCTGCAAATACAGAGAGCAGATTCAAAAGACGCGTCCTGGTCCTGCTCAACAAGCTCTCAAAGCTCGTGCCATGAGGCTTCTCAAGCAGAAGAAAATGTATGAAGGACAACGCGACATGCTCTATAATCAAACATTCAATCTCGATCAAGTCTCATTCGCTGCTGAAGGACTCAAAGATGCTCAACAAACTATGACGGCGCTAAAGTCTGCTAACAAGGAGCTTAAAGGGATGATGAAAACCGTACAGATTCAAGATATCGATAATATGCAAGATGAGATGATGGATCTGATGGATGTGAGTTCCGAGATTCAAGAAACGCTTGGTAGGAG…	581	1	AT3G10640.1	VPS60.1		similar to VPS60.2 [Arabidopsis thaliana] (TAIR:AT5G04850.1); similar to unnamed protein product [Vitis vinifera] (GB:CAO15822.1); contains InterPro domain Snf7; (InterPro:IPR005024)	85.57	194	27	1	2	580	20	213	4e-94	340
MLN2.Contig_1178	GTCTGTTGGTGGTTTTGATCAAATTAAACATAAGAGGATAGGGTTTGGTTCCATGATTAGTTAGTGGTTGCTTGTTTTGGTTTTAGGTTCTTAGAGACAGTTAAATAAAACAAACTTGCTTTGCGTATTCCATTCATAAATTTTTCATTTGATATTTTCTTGAAGCTATTTGACGACTGTGATGGCTTTTGTAACTCCATGGAGCATCTCACTTGCACTGGCCGATTCATACTCTGTTTTACTCAAACAACTTCCGCATGAACCAAGACTTCTATCCATGGTTCTCGCCGGTGATACCGTAAGC	304	1	AT3G50810.1	integral membrane protein, putative		Identical to UPF0497 membrane protein At3g50810 [Arabidopsis Thaliana] (GB:Q9SVL7); similar to unknown protein [Arabidopsis thaliana] (TAIR:AT4G37235.1); similar to unnamed protein product [Vitis vinifera] (GB:CAO41610.1); contains InterPro domain Protein	68.89	45	14	0	167	301	45	89	1e-10	61.6
MLN2.Contig_1179	GAAGGAACGAGGTTCTTGAAGAATCTACAAGAAGTGGAGATTGGGAACATGACAAAAGCATTCAAAGACAAGCTGGCGTCTGGTGGTGAAGACTTTTACAAGATTCAACATGTGCCTTGTGTTGTTTTTGAGTATTGTGACCTTTAAGAATTTGGATGTTATGATCTTGGTAGAGTTTTCCCCTTTTAGGTGGAAAATTGGCAAAAACCTGCTAAACTATAGCGAAAATGTCTTACGGTATAAATAAATAGTTAATAATATT	262	1	AT1G50180.1	disease resistance protein (CC-NBS-LRR class), putative		Identical to Putative disease resistance protein At1g50180 [Arabidopsis Thaliana] (GB:Q9SX38); similar to disease resistance protein (CC-NBS-LRR class), putative [Arabidopsis thaliana] (TAIR:AT1G53350.1); similar to LOV1-like protein [Olimarabidopsis cabu	89.58	48	5	0	1	144	810	857	2e-20	94
MLN2.Contig_118	GTAAATCTCAAAGCCATCGAAGAAGAAATTGCCAAACAGTGCAATAGCCTTCCTAGAGGAGAGTTTGCTTCAAAAGCCCTAAGCCATAGCTTCACAGTATTTGCTCGAGATATGATTGAGGCAATAACTTTCTCGAACCTGTATGCACCTGAACACTTGATCATCAATGTCAAAGACGCTGAGAAATGGGAGGGACTGATCGAGAACGCAGGTTCTGTCTTCATAGGGCCGTGGACTCCAGAGAGTGTTGGTGATTACGCCAGCGGGACAAACCACGTTCTTCCAACGTACGGGTATGCGAGAATGTACAGTGGCGTCTCTCCCGACTCTTTCCTGAAGTTCATGACTGTACAGTCCTTGACAGAGGAAGGTCTGCGTAAGCTTGGTCCCTATGTGGCT…	540	1	AT5G63890.2	ATHDH (HISTIDINOL DEHYDROGENASE)	Encodes histidinol dehydrogenase. Up-regulated in response to UV-B.	Identical to Histidinol dehydrogenase, chloroplast precursor (HDH) [Arabidopsis Thaliana] (GB:Q9C5U8;GB:Q8LA77;GB:Q9FN00); similar to Histidinol dehydrogenase, chloroplast precursor (HDH) (GB:P24226); similar to unnamed protein product [Vitis vinifera] (	96.23	159	6	0	1	477	306	464	9e-84	305
MLN2.Contig_1180	AACTGTACCATTGAAGAGAGTCTCTTGAGATATCGTGCTGTTGTCACTGCTGCAAAGGAGCATTCCATTCCTGTCCGTGGGTATGTATCTTGCGTTGTCGGGTGTCCAGTAGAGGGGGCGGTTCCACCCTCAAAAGTGGCGCATGTTGTAAAAGAGCTCTATGACATGGGCTGCTTTGAGATTTCTCTTGGTGATACAATAGGAATCGGCACTCCCGGTACTGTGGTTCCGATGCTTGAAGCTGTGATGGCAGTTGTGCCAGCAGAAAAGCTGGCTGTTCATTTCCACGATACCTACGGCCAAGCTCTTGCAAACATTTTGGTGTCTCTCCAAATGGGAATAAACATAGTAGACTCATCAGTCGCTGGATTAGGCGGATGCCCATATGCAAAAGGAGCT…	578	1	AT2G26800.2	hydroxymethylglutaryl-CoA lyase, putative / 3-hydroxy-3-methylglutarate-CoA lyase, putative / HMG-CoA lyase, putative		similar to MAM1 (2-isopropylmalate synthase 3), 2-isopropylmalate synthase [Arabidopsis thaliana] (TAIR:AT5G23010.1); similar to unnamed protein product [Vitis vinifera] (GB:CAO67270.1); contains InterPro domain Pyruvate carboxyltransferase; (InterPro:IPR	93.23	192	13	0	1	576	275	466	3e-100	360
MLN2.Contig_1181	GATACTCATAAATCTGCAACACAGATCGCCCAAGATAATACAAGTTTTTTTCTTTTCACGAAAATAAGTCAGAAGAAAATGGCGAGCACTGTGATGACTACACTGCCTCAGTTCAATGGTCTTAGAGCCAGCAAGATTTCTGCAGCTCCTGTTCAAGGCCTGGTAACTGTTCAGCCCATGAGACGCAAGGCAAATGGAGCTTTGGGTGCAAAGTGTGGTGACTTCATTGGTTCATCAACAAATCTGATAATGGTAACGTCGACAACCCTGATGTTGTTCGCGGGAAGATTCGGACTTGCACCATCAGCGAATAGAAAAGCAACCGCTGGACTTAAGCTGGAGGCACGTGACTCGGGTCTACAAACGGGTGACCCAGCCGGGTTCACGCTCGCTGACACT…	575	1	AT1G30380.1	PSAK (PHOTOSYSTEM I SUBUNIT K)	Encodes subunit K of photosystem I reaction center.	Identical to Photosystem I reaction center subunit psaK, chloroplast precursor (PSAK) [Arabidopsis Thaliana] (GB:Q9SUI5;GB:Q9C8G7); similar to unknown [Brassica rapa] (GB:ABB97030.1); contains InterPro domain Photosystem I reaction centre, PsaK subunit (	94.66	131	7	1	79	471	1	130	3e-55	211
MLN2.Contig_1182	GATGAAGCTTGCTAGAGCTATTCAGGAAGCTGAGGCAAGGGAAATGGCTGATAGGTTGTCTGCCTTGACTGGGTTAGCTAATCGGGTTGAAGTTCTAGAGGATGATGATCATACTTCTGAGGATGCCTGGGATGAGATGGATCCTGATGAGCTTTCGTATGAGGAGTTGCTTGCGCTTGGCGACATTGTGGGAACGGAGAGTAGAGGGTTGTCTGCTGATACAATTGCATCTTTGCCTTCAAAAAGATATAAGGATGGAGAAAACCAGAACGGAACCAATGAGTCGTGTGTTATATGTCGTCTAGACTATGAGGATGACATGACTTGATACTGCTTCCATGCAAACATTCTTACCACTCGGAGTGCATTAATAACTGGTTGAAGATAAACAAGATTTGC…	647	1	AT3G19910.1	zinc finger (C3HC4-type RING finger) family protein		similar to BB (BIG BROTHER), protein binding / zinc ion binding [Arabidopsis thaliana] (TAIR:AT3G63530.2); similar to BB (BIG BROTHER), protein binding / zinc ion binding [Arabidopsis thaliana] (TAIR:AT3G63530.1); similar to Os09g0535100 [Oryza sativa (ja	88.46	104	11	1	11	319	195	298	4e-67	184
MLN2.Contig_1183	GAACAATTTCACAGAGTTGTCTCTCTCTCTCTGTTTCTCACTTTTCCAGATTTTAGTAGCTTCTGAAATTTCCTTTTAAAAAATAAGAGAAAAATGACTAAGTTTTGACTTTGCTCACTGCTCTTCATACGGGCGCTGGGCCTGTGGTGATGTTAGTGTATCCACTATACGCATCGGTGGTAGCGTTGGAGACCGCAACGAAAGTAGACGATGAACAGTGGTTATCCTACTGGATCATATACTCGTTCCTCACACTCACGGAGCTGATTCTGCAATCCCTTATTGAGTGGATTCCTATTTGGTACTCGGTCAAACTTTTGTTTGTAGCTTGGTTGGTTCTGCCTCAGTTCCATGGTGCAGCTTTCATCTACAACCGTTTGGTTAGAGAACAGTTCAAGA…	504	1	AT4G24960.1	ATHVA22D (Arabidopsis thaliana HVA22 homologue D)	Homologous to a eukaryote specific ABA- and stress-inducible gene first isolated from barley. Groups in one subfamily with ATHVA22E.	Identical to HVA22-like protein d (HVA22D) [Arabidopsis Thaliana] (GB:Q9S760;GB:Q9SW30); similar to ATHVA22E (Arabidopsis thaliana HVA22 homologue E) [Arabidopsis thaliana] (TAIR:AT5G50720.1); similar to hypothetical protein OsI_034972 [Oryza sativa (ind	84.87	119	18	0	141	497	17	135	3e-58	220
MLN2.Contig_1184	CAACCGCAGAGCGGAACTGGGGGCTTTTCTGGCCAGATTTTTCACCGGTTTACGACGTTGGCCTCCTCAGAAACAAACAAGCTGGTGGTGGTGGTGGACGTCCAGCACCAGCATTGCCAGCGCCTAGTGGTGGTGGTAAATGGTGTGTGGCCAAGTCGGAAGCTACTGATGCGCAGTTACAGGGAAATATTGACTGGGTGTGTAACCAGGGAGGCGTTGACTGTAAACCGATCCAAACCGGTGGTTCGTGCTCTAACCCGAACAGTTTGAGGACACAAGCGTCTTTTGTGATGAATGCTTATTTCCAGAAAAACGGTCGAACTGACCAGTCATGTTATTTCAGTGGAAGCGGAGTCATCGTAGGGGAACAACCCAAGCAATGGTGCGTGTAAGTACTAT…	603	1	AT3G55430.1	glycosyl hydrolase family 17 protein / beta-1,3-glucanase, putative		similar to glycosyl hydrolase family 17 protein [Arabidopsis thaliana] (TAIR:AT2G39640.1); similar to unnamed protein product [Vitis vinifera] (GB:CAO69211.1); contains InterPro domain Glycoside hydrolase, family 17; (InterPro:IPR000490); contains InterPr	67.74	124	40	2	3	374	323	442	7e-42	158
MLN2.Contig_1185	GGAATGGTTACATACCCTGGTTGGAATCCTTACCAGCCTTCTTTAACTGCAATGCCTTCACCTGGAACTCAACCGTCTATTGGACCGAGCTCGGTTTACGGAATGGCGCCGTTATCTCCTTCAGGGACTGCTTATACAGGAACATACCAATCTGGTGGGCCTTCCTTGACTACCTCAAAAGAAGAGTCGTTTCCTCAGCGACCTGATCAGCCTGAGTGTCAATACTTTATGAGAACCGGAGACTGTAAATTCGGATCTTCATGCAGATACCATCATCCTCTAGATGCAGTTCAGCCTAAAACCAGTGTTCTCTTCAGCTCCATTGGCCTTCCTCTTCGTCCAGGCGTAGCGCAATGCACTCACTATGCCCAACACGGAATCTGCAAGTTTGGACCAGCG…	638	1	AT3G06410.1	nucleic acid binding		Identical to Zinc finger CCCH domain-containing protein ZFN-like 2 [Arabidopsis Thaliana] (GB:Q9SQU4;GB:Q0WKX1); similar to nucleic acid binding [Arabidopsis thaliana] (TAIR:AT5G18550.1); similar to unnamed protein product [Vitis vinifera] (GB:CAO71001.1)	83.72	215	32	2	1	636	243	455	1e-92	335
MLN2.Contig_1186	TGGATTCATCGGCAAATCAGCAATCTCCGTTCGTCTAGATTTCTACTGTAAACCTGCCAAATTCGCATACTCGAAACGTCCCTTCTCTGCGTCAAAGCCTCTGGTGGTGGTTCGTTCCGTGGCCTTATCTCCGCCGGCGAGGACAGTTGAGTCGCCGCCGGTTGGTTACCGGAAAAACGTTGGCATTTGTCTCGTTAGTCCGTGTAGAAAGATATTTACTGCATCGAAGATTCACGTTCCGGATACGTGGCAGATGCCTCAGGGTGGTGCTGATGAGGGAGAAGATCTTAGAAATGCTGCTTTTAGAGAGCTGAGAGAAGAAACAGGGGTTACCTCTGCTGAATTCATTGCCGAGATACCAAACTGGCTGACCTATGATTTCCCCCGGGATGTAAAAGA…	572	1	AT5G06340.1	diadenosine 5',5'''-P1,P4-tetraphosphate hydrolase, putative		similar to diadenosine 5',5'''-P1,P4-tetraphosphate hydrolase, putative [Arabidopsis thaliana] (TAIR:AT3G10620.1); similar to bis(5'-nucleosy1)-tetraphosphatase [Brassica rapa] (GB:ABL97947.1); contains InterPro domain NUDIX hydrolase, core; (InterPro:IPR	90.05	191	18	2	2	571	7	196	4e-96	347
MLN2.Contig_1187	GATTTTTGGTAAAGCATCTTCTTCTGTTCTTTTGGAACCATTAGCTTCGTATTCGATCCGAACCTTGTCGCTAACATCCAAGAGCTTATCGAGGAACAGGAACCGTCGCATCCCGAACTTCCTCGACCAATAGGAGAGGCTAACGAACGAGATTCCGGCGAAAATCGAGAGAGAAAGCTGAACCACGGCGTCGTAAGGGCGTCGGTGGTGGAAATCGCAGTCGGAGCATACGAGGACGAAGTGGGAGATGATCGGGACGCCGACGACGAGAATGAAGAAAACGGACCAGGAAAGCAGAGCGGTGCCGCGACTAGACTTGTCGAACCAGAGGACGGTGCTCAAGAAGGGGAAACGCGACGGCGGAAACTCAGGATGGAGTAGATGTTCCCGAGATCCTTG…	542	1	AT3G43590.1	zinc knuckle (CCHC-type) family protein		similar to zinc knuckle (CCHC-type) family protein [Arabidopsis thaliana] (TAIR:AT5G36240.1); similar to unnamed protein product [Vitis vinifera] (GB:CAO67412.1); contains InterPro domain Zinc finger, CCHC-type; (InterPro:IPR001878); contains InterPro dom	25.56	90	64	2	158	418	378	467	1.2	29.6
MLN2.Contig_1188	GATTAATAAAGGAAATTAAATTATTTTTTTAACCAAACACTAAAAAAAGGATTATTGAGGGAACAAAACAAATTAACATCAACCACAAAGCGTGACCAATCTCACCTTCTCTCTCGCTGTGTTCTTACAAGACACACCGAGGATGTCGGATCCCGATTTATCGTCTCCGCTGATCCAGCGTCAACCAGAGGTCGTCATCTCAATCCACGACAACGGAGAAGAAGACTATAATCATCCCTCCGCTGGTCAACAAAACCAACCTCCACGTGTTCCACGTCATGACCATCTCAACCCTCCTTTCGGCTTCCTCAGCGACGCCGAGCCTCCTCCGACGACGGTGGATCCGTTCCGGAACGATACGCCGGGAGTCAGCGGACTGTACGAGGCGATAAAGATCGT…	578	1	AT2G45670.2	calcineurin B subunit-related		similar to unnamed protein product [Vitis vinifera] (GB:CAO24449.1); contains InterPro domain Phospholipid/glycerol acyltransferase; (InterPro:IPR002123)	69.81	159	34	6	143	577	1	153	5e-54	207
MLN2.Contig_1189	ACCAAAGCATCACATACACTTTTATTTCTCTTCTCATCTTTATATTTTTCCTCTTTTACTTTGTCATTTCGAAATGGCCACCGTTGAGAATGAACAAGTGATTGCTCCAGCAGCAGAGAACGTTGAGGTGCCAACAAAGACGGTGGAGGAGCCAGAAGTGACGGAACAGCCGGAAGAAGTCGTCGCCACGACAGAGTCTGCTCCTGCTCCAGCCGCCGTAACAGAAGAAGAATCTGAAGCACCAGTGGTAGAAACGAGCAAAGATGTGGTTGTGGAAGAGGCAGAGGAAAAAGAAGAAGAAGCAGAGAAAGAAACGGAGGAGCCAAAGGTAGAAGAGGAAGAAGAGAAGACAGAAAATCCAGCGGTTGTGGAGGAGCCAAAGGAAGAAGAGAAAGAGGA…	638	1	AT1G12080.2			contains domain PTHR22683 (PTHR22683)	64.71	17	6	0	215	265	43	59	3.5	28.5
MLN2.Contig_119	GAACAATGCTATTGTTTGCAACATTGGTCACTTTGACAACGAGATCGACATGCTCGGACTCGAGACCTTCCCTGGTGTGAAGCGTATCACCATCAAGCCCCAAACCGACAGGTGGGTCTTCCCAGACACCAAGTCCGGAATCATTGTTTTGGCTGAGGGTCGTCTCATGAACTTGGGTTGTGCCACTGGTCACCCTAGTTTCGTCATGTCTTGCTCTTTCACCAACCAGGTGATTGCCCAGCTTGAGCTTTGGAACGAGAAGTCGAGCGGCAAGTACGAGAAGAAGGTGTACGTTCTACCCAAGCATTTGGACGAGAAGGTTGCAGCTCTTCACTTGGGAAAGCTTGGAGCTAAGCTCACCAAGTTGACAAAGGACCAATCTGACTACGTCAGCATTCC…	588	4	AT3G23810.1	SAHH2 (S-ADENOSYL-L-HOMOCYSTEINE (SAH) HYDROLASE 2); adenosylhomocysteinase		Identical to Adenosylhomocysteinase 2 (SAHH2) [Arabidopsis Thaliana] (GB:Q9LK36;GB:Q8LPS8;GB:Q944K5;GB:Q949Z9); similar to HOG1 (HOMOLOGY-DEPENDENT GENE SILENCING 1), adenosylhomocysteinase [Arabidopsis thaliana] (TAIR:AT4G13940.1); similar to HOG1 (HOMO	96.55	145	5	0	2	436	341	485	3e-68	254
MLN2.Contig_1190	GATTGATTTGCTTCCTCTAATTCCTCTCGTCACGTTCTCCATTTTTGGGGTTGTTTCCTCTACGCTCACCAAGATCTCCAATTGTCTACCTCTTTCTCTCTTTCAAGATTCTTTAATGGTAAAAGCATATAAACAAGAGCATGTCTACAAGCATCCATGGGAGCGGGTGAGTGCTGCCTCATGGAGGAAGTTTGCTGACCCTGAAAACAAACGCATCCTTTCTCATATCCTCGAAGTCGACACCTTGAACCGCAAACTCGACACTGACACCGGGAAGCTCCACACCACACGTGCTCTCACCATTCACGCTCCCGGTCCATGGTTCCTTCACAAGATCATAGGCCAAGACATCTGTCATTGTGTTGAGTCAACTGTTGTCGATGGCAAGTCACGTTCTAT…	602	1	AT5G13070.1	MSF1-like family protein		similar to unnamed protein product [Vitis vinifera] (GB:CAO21938.1); contains InterPro domain MSF1 (InterPro:IPR006797)	96.3	162	6	0	116	601	1	162	6e-90	326
MLN2.Contig_1191	ACTGATGAGTTGGTTGTTGGTATAATTGATGAAGCCATGAACAAGCCAAAATGTCAGAAAGGTTTCATCCTTGATGGGTTTCCCAGGACTGTTGCTCAAGCAGAGAAGCTAGACGAGATGCTTAAGAAGCGGGGGACTGGAATCGACAAAGTCCTCAACTTTGCCATCGATGACTCAGTCCTGGAGGAAAGGATCACCGGGAGATGGATCCACCCATCTAGTGGCAGGAGTTACCACACCAAGTTCGCGCCTCCCAAGACCCCTGGAGTTGATGATATTACCGGAGAGCCTCTGATCCAACGCAAAGATGATAATGCTGAGGTTCTAAGGTCGAGGCTTGCTGCGTTCCACACTCAAACTGAACCGGTGATCGACTACTACGCGAAGAAGTCTGTTCTT…	573	1	AT5G63400.1	ADK1 (ADENYLATE KINASE 1); adenylate kinase	encodes a protein similar to adenylate kinase.	Identical to Adenylate kinase 1 (ADK1) [Arabidopsis Thaliana] (GB:O82514;GB:Q9FMW2); similar to adenylate kinase, putative [Arabidopsis thaliana] (TAIR:AT5G50370.1); similar to Os11g0312400 [Oryza sativa (japonica cultivar-group)] (GB:NP_001067759.1); si	88.67	150	17	0	1	450	93	242	8e-75	276
MLN2.Contig_1192	AGAGCCGCAGCCGTGGGCGGAGCCACAGTCGTAGCCGCAGCAGAAGCACGAGCAGGAGCCCAAAGGCTAAATCTTCGCGTAGATCGCCTGCAAAATCTATGTCAAGATCCCCTCGTTCCCGCTCAAAGTCAAGGTCACCACCTCCGCGAGGATCTCGTTCAAGGTCAAGATCTCCTCTGCCTTCTGTTCAGAAGGAAGCAAGTAAGAGCCCTAGCAAGCTGAGTCCAGCCAAGAGCCCTATGCGTAGCAGGAGCAAGAGCAGAAGCAGGAGTCCATCTCGGTAAACAAACAGAGTAAAGTTATCTCATAATCAGGTAAAAGAAGCTTGGTTTTGTAGGAAGATTCTCCGAAGGATCATATCTATGTTATGTTGTTTCGTTTGGTTATAACTCATGTACG…	487	1	no significant hit
MLN2.Contig_1193	GTCCTCAACATATTGTTTTCCCTATCGAAGGCACATTCGGGTATCTAGCTCCAGAGTACTTTATGCATGGGGTTGTTGATGAGAAGACGGATGTGTTTGCTTTTGGGGTGTTGCTTCTAGAGATCATAACTGGTCGTCGAGCGGTTGATACAGATAGCAGGCAAAGCATTGTGATGTGGGTGAAACCGCTTCTGGAGAAGAGCAGCTTGGAGAAAATAGTTGATCCTAAGCTAGGAAATGACTTTGATGAAACTGAGATGAGAAGGGTGATGCAAACAGCTTCAATGTGCATACACCATGTAGCCACTATGCGTCCTGATATGAACCGGTTGGTGCAGCTATTGCGTGGGGATGACCGGTTAGCTGAGCCGCACGGCGGAGCAAGAACAGTGAGTCTCG…	624	1	AT5G65530.1	protein kinase, putative		similar to RBK1 (ROP BINDING PROTEIN KINASES 1), kinase [Arabidopsis thaliana] (TAIR:AT5G10520.1); similar to unnamed protein product [Vitis vinifera] (GB:CAO23655.1); contains InterPro domain Serine/threonine protein kinase; (InterPro:IPR002290); contain	88.05	159	18	2	3	476	299	456	4e-76	280
MLN2.Contig_1194	GCGTGACGGAGCAGTCCAGGGCCTTCGCCACAACCTCTGCTTCTGCCTTGGAGGAGCTTACAGAGTGGAATGCACTCTACAGAGAAAGATTTGGCTTTATCTTCATTATTTGCGCCTCCGGCAGGACTCACGCCGAGATGCTCGCCGAGTTAAAGGGAAGGTATGCAAACAGACCGATAGTGGAGCTCGAGATTGCTGCTAAGGAGCAGATGAAGATAACTGAGCTCCGGATGGCAAAGCTCTTCTCCGAGAAGGCTAAAGCTGTTTCACAAACTGAGTCCACAAAACCTCAAGAAGGTCCCAAGAGAAGCAGGCCACCCATCACCACTCACGTCTTAGACGTCTCACGTGGTGCTCCAGCCGCAGGTGTTGAAGTGCACTTGGAGGTGTGGAATGGTA…	577	1	AT5G58220.3	TTL (TRANSTHYRETIN-LIKE PROTEIN); steroid binding		Identical to Bifunctional hydroxyisourate hydrolase/2-oxo-4-hydroxy-4-carboxy-5- ureidoimidazoline decarboxylase (TTL) [Arabidopsis Thaliana] (GB:Q9LVM5;GB:Q2V2X6;GB:Q2V2X7); similar to unnamed protein product [Vitis vinifera] (GB:CAO23132.1); contains I	78.5	200	34	2	3	575	78	277	1e-84	308
MLN2.Contig_1195	GACACCTTTCCCCGAGTTCCGACAATGGCTTCAGCATCAGCGACAGCCACTCTTCTGAAGCCCAGTCCTCTTCCACCCTATAAACCGATCATCACCGCCTCCGTATCTCCTCCTCTCCCTCCTCCTCGTCGCCACAACCTCCTTCGCCGCGATGTACTCTCCTTATCCGCCGCATCGACGCTTCTTCTAACGCAATCTCTCCCGTTTCTAGCTCCGCCGCCGGCTTCTGCCGCCGAAGACGAAGAGTACGTGAAAGATACGTCGGCGGTGATCTCCAAAGTTAGGACGACGCTCTCGATGGAGAGGACAGATCCGAATGTGGCGGATGCGGTGGCGGAGCTGAGAGAAGTGTCGAACTCGTGGGTTGCTAGGTACAGGAAGGAGAAAGCTCTTCTCGGG…	566	1	AT1G03600.1	photosystem II family protein		similar to unknown [Populus trichocarpa x Populus deltoides] (GB:ABK96761.1)	93.07	101	7	0	247	549	74	174	2e-48	188
MLN2.Contig_1196	TGCCTTATAAGTATGACCTGCACAAGTTCTGTCCATACAACACTGTCCTTGTAGACCATGGAGATCCATCTGTAAATACAGTTCTGACAGCACCAACGGATAAACCTGGTGTGGCCTTGCTTGATTTTGTCATATTCCCTCCTCGTTGGTTGGTTGCTGAGCATACCTTTCGACCTCCTTACTACCATCGTAACTGCATGAGTGAATTTATGGGCCTAATCTATGGTGCTTACGAGGCCAAAGCTGATGGATTTCTACCTGGTGGCGCAAGTCTTCACAGTTGTATGACACCTCATGGTCCAGATACAACCACATACGAGGCGACGATTGCTCGTGTAAATGCAATGGCTCCTTATAAGCTCACAGGTACAATGGCTTTCATGTTCGAATCAGCATTGA…	634	1	AT5G54080.2	HGO (HOMOGENTISATE 1,2-DIOXYGENASE); homogentisate 1,2-dioxygenase	homogentisate 1,2-dioxygenase	Identical to Homogentisate 1,2-dioxygenase (HGO) [Arabidopsis Thaliana] (GB:Q9ZRA2;GB:Q8L9I0;GB:Q9LDB8); similar to unnamed protein product [Vitis vinifera] (GB:CAO39358.1); similar to homogentisate 1,2-dioxygenase [Lycopersicon esculentum] (GB:AAF73132.	96.02	176	7	0	3	530	280	455	1e-102	368
MLN2.Contig_1197	GATTGAGAACCCTAAACCCTAAATCAGTTGGCGAGCGATGGAGGGAGTAGAGAAGTTTTTCAGCAAGATGGTGACAGATGCGAAATCGGCAGCTTCTTCTTCTTCCTCTTCTCTTTCTGATTTCGCGGATAATCTAATCCAGGAGAAACGAGCCGGCGGCGGCGGCGGCGGCGGAGGTAACTCCAACTTCATACGACACTTCCGCAGTTTTGGTCAAAAGAACTCCCAGTGGAGTATCGGCCTGGACGTGTACAAAACTGTGCGCTGTTTTCTTTGTCGCTGGAGTGTTTGTGGGTTATACGCTTAAGAGACGGGTCCGAAGCTGGGCTTCTAAGCTTCTCAGAAAAATCAGAGATGATTAAACTCCATACCTCTCTTCTGCTTCTTGAATGTGTTTTA…	552	1	AT1G19240.1			similar to unnamed protein product [Vitis vinifera] (GB:CAO65194.1)	84.62	39	6	0	38	154	1	39	4e-21	45.8
MLN2.Contig_1198	ATGGTTGGATGCAGTACTTGTCCCGGCGGGTCTCGCCGTGATGGTCGCCTACCACGTCTGGCTCGGCTACGCTATAATCCACCGTCCCAAGCTCACTGTAATCTCCCTCAACGCTGAGTCTCGACGGCAATGGGTCTTCTCTATGATGACCGAGCCGCTGAAAAACGGTACACTGGCAGTACAGACAATAAGGAACAACATAATGGCATCAACGCTTTTAGCCACAACAGCAATCACTCTCTGTTCCATCATCGGCGTCTTCGTAAGCAACACCTCTGCTTCCAAATCCACAGCCTCGCCTATCATATTCGGAAACAAAAGCCCTCTCCTTGCAACCATCAAGAACTTTGCGATCCTCGTATGTTTCCTCATGGCCTTTCTCTGCAACGTCCAGTCCAT…	640	1	AT3G18215.1			similar to unknown protein [Arabidopsis thaliana] (TAIR:AT5G24600.1); similar to unnamed protein product [Vitis vinifera] (GB:CAO68116.1); contains InterPro domain Protein of unknown function DUF599 (InterPro:IPR006747)	89.15	212	23	0	5	640	7	218	1e-98	355
MLN2.Contig_1199	GTCTACGTTTCCATTTTCACCGTTGTCTTCGGTAGTTCTAGCTTTAACCCTACCGGAAACGCCGCCTTTTATGCCGCCGGTGTCCCCGGAGATACTCCTTTTCACCTTGGCGATCAGGTTACCTGCTCAGGCAGCTGGTGCGGCAGGAGGTGCATTGGCCATCATGGAGTTCATACCAGAGAAGTACAAGCATATGATATCAGGACCTTCCCTTCAGGTTGATGTGCACACCGGAGCTATTGCTGAAACCATCTTAAGTTTCGGTATTACCTTTGCGGCTTTGCTTATTATCATCAGGGGTCCACGAAGATTACTCGCTAAGACCTTCTTGCTCGCTCTTGCAACCATTTGCTTCGTTGTTGCTGGCTCTAAATATACCGGACCAGCCATGAATCCCGC…	608	1	AT3G04090.1	SIP1;1 (SMALL AND BASIC INTRINSIC PROTEIN 1A)	Belongs to a family of plant aquaporins. Similar to yeast and radish aquaporins. Located on ER.	Identical to Aquaporin SIP1-1 (SIP1-1) [Arabidopsis Thaliana] (GB:Q9M8W5;GB:Q0WWC3); similar to SIP1,2 (SMALL AND BASIC INTRINSIC PROTEIN1B) [Arabidopsis thaliana] (TAIR:AT5G18290.1); similar to small basic intrinsic protein 1 [Vitis vinifera] (GB:ABD467	94.17	120	7	0	161	520	108	227	8e-60	182
MLN2.Contig_12	GACATCCAACAGCGAAACAAAATCTTAGTAAACACAACTCAACAAAATCGCCTTATCACAAAAAAAAAGAGAAAATCAAAACACATGACTATGGGTCTGAAGTTCTTTACATGCCTTGTTTTGACGGTCTGCATTGCCGCATCAGTAGATGCAGCACTCACATGTGGTACAGTGACAAGTAGCTTGGCTCCATGTGCCACCTACCTATCGAAAGGTGGGGCGGTGGTGCCGGGTCCATGTTGTGCGGGAGTAAAAAAATTGAATGATATGGCTCAAACCACACCGGACCGCCAACAAGCATGCAAATGCCTAAAGGCCGCTGCAAAAAGCATCAATCCAAGTCTAGCCTCCGGCCTTCCTGGAAAGTGCAGTGTTAGCATTCCCTATCCTATCTCCATG…	608	3	AT5G59320.1	LTP3 (LIPID TRANSFER PROTEIN 3); lipid binding	lipid transfer protein 3	Identical to Non-specific lipid-transfer protein 3 precursor (LTP3) [Arabidopsis Thaliana] (GB:Q9LLR7;GB:Q9FIE6); similar to LTP4 (LIPID TRANSFER PROTEIN 4), lipid binding [Arabidopsis thaliana] (TAIR:AT5G59310.1); similar to lipid transfer protein 4-lik	76.72	116	24	2	85	423	1	115	1e-41	166
MLN2.Contig_120	CGACCCAGCCGCGAACTTCCACACTTACTCAATCCTCTGGAACCCTCAAAGAATCATATGGACCGTCGATAATRCACCGATTAGAGAGTTTAAAAACTCTGAGCCTCTCGGTGTTTTGTTTCCAAAGAGCAAGCCGATGAGGATGTACGCGAGTTTATGGAACGCAGRTGATTGGRCAACGAGAGGCGGTCTGGTTAAAACGGATTGGTCCAAAGCTCCATTCGTGGCTTCTTACAGGCACATTAAATGTGATGGGTGTGTTCATGCTAACGGCCGGTCGTCTTGTAGCTCGACGAGACCAACCTCTAATTGGTACACTCAACAAATGGATTCGACGAGCCAAGCTAGGCTCAGATGGGTCCAGAAGAATTATATGATATACAATTATTGTACGGATAG…	576	2	AT4G30270.1	MERI5B (MERISTEM-5); hydrolase, acting on glycosyl bonds / xyloglucan:xyloglucosyl transferase	encodes a protein similar to endo xyloglucan transferase in sequence. It is also very similar to BRU1 in soybean, which is involved in brassinosteroid response.	Identical to Xyloglucan endotransglucosylase/hydrolase protein 24 precursor (XTH24) [Arabidopsis Thaliana] (GB:P24806;GB:O64956;GB:Q39148;GB:Q39149;GB:Q41904;GB:Q8LDQ0); similar to TCH4 (TOUCH 4), hydrolase, acting on glycosyl bonds / xyloglucan:xylogluc	75.68	148	36	1	2	445	135	269	4e-64	240
MLN2.Contig_1200	AGGTTATCATTGGGCTTCTTGTTGGTGCCATGCTTCCTTACTGGTTCTCAGCCATGACGATGAAGAGTGTGGGAAGTGCAGCGCTTAAGATGGTTGAAGAAGTTCGCAGGCAGTTCAACACCATACCTGGACTCATGGAAGGTACCGCAAAACCAGACTACGCCACGTGCGTCAAGATCTCCACCGACGCTTCCATCAAGGAAATGATTCCTCCTGGTTGCCTTGTCATGCTCACACCTCTCATTGTTGGTTTCTTCTTTGGTGTTGAGACTCTCTCTGGTGTTCTCGCTGGCTCCCTTGTTTCCGGTGTTCAGATTGCTATTTCTGCTTCCAACACTGGTGGCGCCTGGGACAACGCCAAGAAATACATTGAGGTACAGAACTGATTGTTATCACCAC…	570	1	AT1G15690.1	AVP1 (vacuolar-type H+-pumping pyrophosphatase 1); ATPase	Encodes a H(+)-translocating (pyrophosphate-energized) inorganic pyrophosphatase (H(+)-PPase; EC 3.6.1.1) located in the vacuolar membrane. Expression is found in all tissues examined, including meristems and floral organ primordium. Expression is particu	Identical to Pyrophosphate-energized vacuolar membrane proton pump 1 (AVP1) [Arabidopsis Thaliana] (GB:P31414;GB:O80390;GB:Q41919;GB:Q41920;GB:Q56WP6;GB:Q8RY20;GB:Q8VZE3); similar to AVP2 (ARABIDOPSIS VACUOLAR H+-PYROPHOSPHATASE 2) [Arabidopsis thaliana]	86.77	189	25	1	3	569	579	742	1e-85	312
MLN2.Contig_1201	GAGCTCAGGCGGCCCTTTCAATCTCAAAAAGAAAAAAACAAATCGTCTTGATTGGAGACGACGACAATGCAGAGGCTTTGCACTAAGCTCCGTTCCATTTCACTCCGTTCTAACCGGAACCTCTCTTTAATCGGCGCTCCTCACCGTCTCATCCACCATTCCCCGACTTCTCAGCTAACCCTAGGTTTCGCCACGCCCACGCCGAGCAAATGGAGCTTCCTCCCCGCCACCTCGCTCGCCGGAGCTTCTCCCTTCGTTCCTCATCATTTTGTTCAAGTACGGAGCATCACTTCCAAGGACAAGATGGCAAAGTGGAAGAAGAAGTGGAGGCCTAGGACTCCAATCACCTCTAAAGTCAAGAAAGTCAAGATCAAGTTCGATTCGTCATACAAAGACAGG…	593	1	AT5G45590.1	structural constituent of ribosome		similar to Os10g0579500 [Oryza sativa (japonica cultivar-group)] (GB:NP_001065508.1); similar to unknown protein [Oryza sativa] (GB:AAG46165.1); contains InterPro domain Ribosomal protein L35; (InterPro:IPR001706)	77.14	175	28	4	67	555	1	173	5e-56	213
MLN2.Contig_1202	CACACTCCATGGGATGCATCGTTGCAGTAGCCTTAGCTGCCAAATTCTCCGGTAGTGTCAAGTCCGTCGCTTTAGTAGCTCCGCCGTACTTTGGTGATAAAGAAGGAGCAAGTTGTGATGCTCTTGATGTGATAGCCGAGAAGAAACTTTGGCCTCCAACTTCGTTTTTCTCAGCGATGATGGCTTGGTACGAACACATTGCACGTGGGGTTTGCTTTGTTGTGTGTAGGCACCACCGTACATGGGAGAAGATCATCAAAATTATAACTTGGAGAAGTAAACTACCAATGGCGATAACCGAACTGACCAAGCACACGCATCAGTCGTCATGGCATAGCATGCACAATGTGTTATGCGGAGGAGCAAAATTCACGGATAAACACCTTGAAGGTTTGATAA…	567	1	AT5G17720.1	hydrolase, alpha/beta fold family protein		similar to hydrolase, alpha/beta fold family protein [Arabidopsis thaliana] (TAIR:AT5G17780.1); similar to unnamed protein product [Vitis vinifera] (GB:CAO45431.1); contains InterPro domain Alpha/beta hydrolase; (InterPro:IPR003089); contains InterPro dom	79.37	189	38	1	3	566	241	429	8e-88	319
MLN2.Contig_1203	GAGAAACGAGAAACGACGATGGCGACGAGTCTCCTGAAACTCTCCTCTCAAATCCGCCGCCTCTCTCCACTCACCAGATCCCTAACCGTCCGCACCTCCGCCACATCCACCGGATCGAAGAAAGTCTCCGACCGAATCGTCAAGCTCTCCGCGATCGACGCCGACGGAGACAAGAAGGACATCATCGGCCTCTCCGGCCAGACTCTCCTCCGCGCGCTCACCCACACCGGCCTGATCGATCCGCTGTCGCATCGCTTGGAGGATATCGACGCTTGCTCGGCCGAGTGCGAGGTCCAGATCGCTGAGGAATGGCTCGAGAAGCTTCCTCCGCGTACCTACGACGAGGAGTACGTGCTGAAGCGTAACTCGAGATCACGTGTGCTGAACAAGCACTCGCGT…	591	1	AT3G07480.1	electron carrier/ iron-sulfur cluster binding		similar to unknown [Populus trichocarpa] (GB:ABK94264.1); contains InterPro domain Beta-grasp fold, ferredoxin-type (InterPro:IPR012675); contains InterPro domain Ferredoxin; (InterPro:IPR001041)	88.05	159	14	1	19	480	1	159	3e-66	247
MLN2.Contig_1204	CTTCTGTCCGTATCCGCTTATTTTTCTCGACAAGTCATGCGTTTGACGCTTTTCACCTCAGGTGAGAAATGAATTGACATCTCTGCCCTTTCTTGTGTACATTGACCATTATCACCCTGATCCGATAACCACGTGCCATCATCTGAAGAAAAGTAATCAAATGAGTCAAAACCACCACGCGCATGCAGTTCAAACGACGGGCGCGTCGAGAAAACGCAAGGACATGACGGAGAGTGGTTTAGATTTTGATCCAAGAGCCGCTTCGGCTACATCGAACCTGGTCTTGGCCGGCTACATGGCTCACGAGTTCCTCACGTGCGGGACGATGTTGGGCCGGAAGCTATATCCTGGATGGGCTGAAGTTGGGCCGTTGGACACGCCGTCGCCGCAACAACACAG…	622	1	AT3G23440.1	EDA6/MEE37 (EMBRYO SAC DEVELOPMENT ARREST 6)		similar to unknown protein [Arabidopsis thaliana] (TAIR:AT5G44060.1); similar to unnamed protein product [Vitis vinifera] (GB:CAO71442.1); similar to hypothetical protein [Vitis vinifera] (GB:CAN78966.1)	78.57	28	6	0	435	518	81	108	2e-34	52
MLN2.Contig_1205	AACCAAAGCGAGGATGAAGAGAGTTTGACTTCTGAGGCTTGTGGGGAGTTGGAGTCGGCATGTGTGTATGGTCCCAACTCGCCTAGAGCAAAGAACAGCTCGAGCTTCTCTGACAGCACTATTGCTTCTGCCTTCTCGGAGTATGGTTCTCAGAAAGCTCCTCAGAATGCTGATGATACTGTGAAAGGAAGCATTTGTCATCCACATGAGGCAGAAAATGCTTGCGGTTCAAATGCAAAAAGGAACCCAGGACAGCGTTCAAGAGTTCGTAAGCTCCAGTACATTGCTGAACTTGAGAGGAGAGTCTCCATGCTGCAGGCAGTGGAAGCGGATTTATCAGTGAGGGTGGCTTCACTTCTTCAGACACGTGCAACACTGTCTTTGGAGAACAGCCAGATG…	634	1	AT5G04840.1	bZIP protein		similar to bZIP transcription factor family protein [Arabidopsis thaliana] (TAIR:AT2G42380.2); similar to unnamed protein product [Vitis vinifera] (GB:CAO66011.1); contains InterPro domain Basic-leucine zipper (bZIP) transcription factor; (InterPro:IPR004	77.21	215	45	3	1	633	96	307	4e-71	264
MLN2.Contig_1206	TGCACTTTCGATGGTAAACGTGGTGTCAGTATGGGCATTGAGTCAGTGGTGGACCAGGAAAACGTCAAATCGTCCAATGGTGTCGGAGATGCCGCGTGTTCTGCATGTGAGATGGCAGTTGTTTGGATACAGAGCCAGTTGAGGCAGAACATGACCCAGGAACGCATATTGGACTACATCAACGATCTATGCGAGCGTCTTCCCAGCCCAATGGGAGAGTCTGCAGTGGACTGTGCTCAACTCTCGACCATGCCCACTGTTTCGCTCACCATTGGAGGCAAAGTCTTTGATCTCGCTCCAGAGGAGTATGTTCTGAAGGTTGGTGAGGGCCCTGCGGCACAGTGCATCAGTGGCTTTATTGCACTCGACGTTGCTCCACCTCGTGGTCCTCTCTGGATC…	583	1	AT1G11910.1	aspartyl protease family protein		similar to aspartyl protease family protein [Arabidopsis thaliana] (TAIR:AT4G04460.1); similar to aspartyl protease family protein [Arabidopsis thaliana] (TAIR:AT1G62290.1); similar to aspartyl protease family protein [Arabidopsis thaliana] (TAIR:AT1G6229	94.3	158	9	0	1	474	348	505	1e-84	308
MLN2.Contig_1207	GGCTCGGTTGGGTTCCTCATCGGTTCGAAGTTGTGTTTTAAAAATGTCTTTTGTTTTTCATGGATCTCGCTTTGCCCAATATGTTTTAGTTTTGGGTTGGGCGAAATCATCACAAACTGTTTACATGTATTGTTCCATTGAGAAAGGAACAAGTATCTGCT	161	1	AT5G05130.1	SNF2 domain-containing protein / helicase domain-containing protein / RING finger domain-containing protein		Identical to Putative SWI/SNF-related matrix-associated actin-dependent regulator of chromatin subfamily A member 3-like 1 [Arabidopsis Thaliana] (GB:Q9FF61;GB:Q8RWB4;GB:Q8RWC7); similar to RAD5, ATP binding / DNA binding / helicase/ protein binding / zi	52.63	19	9	0	73	129	616	634	6.5	25.8
MLN2.Contig_1208	TTCTTGAGTGCTTCTTTCCTTACCACATACATCTTCACAATGTCTTTACGTGCGGTTCTTCTTGAAAGAGGAGTGAACAAGGTTGTCTACAAACAGGAAACATATTATATTAGTTACAACAAATGATAACAGAAAAAAAAACATACAGATTAGAGAAGCAGGGAATTTACCTTCTCTACGAAATGTTTCCATGCTGCACTCTCAACAAATGATAAAGGCAATTGCCCTATCACCAGCATTTGATTGGTAGCTTCTCTAAACTGAGCTTCAGTCACCTTTGCCTTCTTAAGTTTCCCCTCATCATCAATAACGGGCTGCTTATTTTTCTGTCCAGCTAACCAAGCATGATGGTTCTTGCATACTTCAAGATGTTTCTTCAGATTTGATGTTCCTGAGGAG…	539	1	AT2G17740.1	DC1 domain-containing protein		similar to DC1 domain-containing protein [Arabidopsis thaliana] (TAIR:AT2G44370.1); similar to unnamed protein product [Vitis vinifera] (GB:CAO67189.1); contains InterPro domain C1-like (InterPro:IPR011424); contains InterPro domain DC1 (InterPro:IPR00414	38.89	36	22	2	307	414	36	67	1.5	29.3
MLN2.Contig_1209	TGACACGGCGGAGGAAGCAGCCTTGGCTTACGACAAGGCGGCGTATAAGCTGCGCGGCGATCACGCCCGGCTTAACTTCCCTAACTTACGTCACAACGGTTCCCACATCGGCGGCGAGTTCGGCGAGTACAAGCCTCTTCACTCAACGGTCGACGCTAAGCTCGAAGCTATTTGTCAGAGCATGGCGGAGACGCAGAAACAGGACAAAACAGCGAAAGCTTCGAAGAAACGTGCCTCGACGGTGAAGAAAACTGAGAAGGTTGATTTGTCGGAGAAAGTCAGTCCGGTGACGGAGTTCGTTGAGTCCGCCGGGTCTTCGCCGTTGTCGGAGCTGACGTTCGCTGACACCGAGGAGCAGCCGCGGTGGAACGAGACCTTCTCGTTGGAGAAGTATCCGTC…	547	1	AT1G78080.1	RAP2.4 (related to AP2 4); DNA binding / transcription factor	encodes a member of the DREB subfamily A-6 of ERF/AP2 transcription factor family (RAP2.4). The protein contains one AP2 domain. There are 8 members in this subfamily.	Identical to Ethylene-responsive transcription factor RELATED TO APETALA2 4 (RAP2-4) [Arabidopsis Thaliana] (GB:Q8H1E4;GB:O23106;GB:Q94K95;GB:Q9C9S5;GB:Q9SGZ3); similar to AP2 domain-containing transcription factor, putative [Arabidopsis thaliana] (TAIR:	71.94	139	26	3	53	430	199	334	2e-45	178
MLN2.Contig_121	GACTTGCTAAGGATTTGGTTGATAAATGGTCTCGTCCAATTTTCAACAAGAGCACAAGGTTTGAAGACATGAGAAATCTTGATGAAGATAGGGCTCCCTATAGAAGGCCACCAGTGAAGAAACCTGTCAACAAAGCTTCGACAATGGAGTCAAGAGATGGTGACTTTGACTTAGATATTCGGCAACGARAATCTGGTCTGACTTCGGGTCAGAGTTCGAGGGGAGACTCGTCCAGGAACATGACCATGAGACCAGAAGCAACTCCAATGGACTTTCTGATTCGTCCTCAGTCCAAGATTGACCCAGATGAGGTCAGAGCCCGTGCTAAGCAGGTTTCTCAGGACCAGCGTCGAGTGAAGATGAACAAGAAGCTCCAGCAGCTAAAAGGACCAAAGAAGA…	643	2	AT1G32130.1			similar to IWS1 C-terminus family protein [Arabidopsis thaliana] (TAIR:AT4G19000.1); similar to hypothetical protein [Vitis vinifera] (GB:CAN83660.1); contains InterPro domain IWS1, C-terminal (InterPro:IPR008654)	88.74	151	17	2	3	455	355	502	1e-60	229
MLN2.Contig_1210	CAGTGGTATCAACGCAGAGTGGTCATTACGGCCGGGGAAGCTTGTTATAGAACGCAAAATCATGTGTACATTGTTTAAGTTTGTGTGTCATGAGAGGCAATAAAAGTGTGTTAGAAATCAAACTAATATTGATACATATACACTGAAGTGAATTTGTAATGCCAGTGATGTTTAAGTCT	179	1	no significant hit
MLN2.Contig_1211	GTGGCAAGTACTAAGATGTTTATTGAGAAATGGGAGGAGATGAGAAACGGAGAAGAGGAGATTGAGCTAGATGTACACAGAGGGGTACACAGTTTGTCTGCACATATGTTATCAAGAACAGCTTTTGGTAACAACGTAGAAGAAGGGAAACGAATCTTTGCCTTGCAAGAGCGTATGATGCGTCTCTTCTATCTAGTCCGATGGAGCATTTACATCCCTGGGTACAGATTCTTGCCTTCCAAGACTAATAGAGAGATATGGAGGATTGAGAAACAAATCCGTGGTTCTATCCTGGGACTCATCGAGA	307	1	AT1G75130.1	CYP721A1 (cytochrome P450, family 721, subfamily A, polypeptide 1); oxygen binding	member of CYP721A	similar to BAS1/CYP734A1 (PHYB ACTIVATION TAGGED SUPPRESSOR 1), oxygen binding / steroid hydroxylase [Arabidopsis thaliana] (TAIR:AT2G26710.1); similar to unnamed protein product [Vitis vinifera] (GB:CAO61188.1); contains InterPro domain Cytochrome P450,	80.39	102	20	0	1	306	170	271	4e-43	169
MLN2.Contig_1212	GAAGCACGAGTGCAGCAAGGGACTGCAGCTAGGTGTTAGTTTTGCTGGAGGGTATGTTGCTGGAGTGTTTTGTGCTATTGTGTCTCACCCTGCTGACAATCTCGTGTCGTTCCTCAACAACGCTAAGGGAGCAACCGTTGGAGATGCTGTGAAGAAGATCGGAATGGTGGGTCTGTTCACGAGAGGGCTTCCTTTGAGAATTGTGATGATAGGGACATTGACCGGAGCTCAGTGGGGTTTGTACGATGCCTTCAAAGTGTTTGTTGGCCTGCCAACCACTGGTGGTGTTGCTCCAGTCCCTGCCGCCAAAGCCTAAAGAATTAAATGATGATGAAAATGGTTAGGATTTTTGTTTGGAAAGAAACAAATAAAAAAAAACGTATGATGAGGAAGAGTGAG…	598	1	AT5G14040.1	mitochondrial phosphate transporter		similar to mitochondrial phosphate transporter, putative [Arabidopsis thaliana] (TAIR:AT3G48850.1); similar to unnamed protein product [Vitis vinifera] (GB:CAO49083.1); contains InterPro domain Adenine nucleotide translocator 1; (InterPro:IPR002113); cont	98.92	93	1	0	2	280	267	359	5e-48	187
MLN2.Contig_1213	GACACGCCATTTGCATTTTCTCTCGAGTGTTGTTTTTTTCCTTTCTCTCAAAGATGGCTCAGGAAGATGTTGCTTCGGTTGTTGAGAAGTCTGTTCCTTTCACCGCGTACAAGCCCCAGCTGATCGTGGAGTCTCAGAGGGTCGGTGACGCTGTTGCCTTCTACAAGACCGTGTTTGGTGCGGAGGAGACTGGACACTCTCTCTACCCTAAGCGTAAGGCTGACCAAGAGCTTCCTCACCTTGTCTCTGCCGAGCTCAAGCTCGCTGGCACTACCGTCGTTGTTTCTGACGTCTCCGTTAACTCTAATGCGAAGATAGGGACTATGCCTGCGATTCTCGAAACTGATGACGTGGAAGCTGCTGTTATGAAAGCCGTTGGCGCCGGAGCTGTCAAAGTGG…	596	1	AT5G48480.1			Identical to Uncharacterized protein At5g48480 [Arabidopsis Thaliana] (GB:Q9LV66); similar to unknown [Populus trichocarpa] (GB:ABK95611.1); contains domain SSF54593 (SSF54593)	47.31	167	73	4	54	509	1	166	1e-21	99.4
MLN2.Contig_1214	CATCAAAATTCGACTGTGACTATGCCTATGTCCTTGGGCGTATATGTTACCACATCCTTGCAGCTGGTTTGAACGGCTACATGGCAACTGTGACTAACCTAAAGAGTCCTGTAAACAAATGGAAGTGTGGCGCCGCACCTATGACGGCAATGATGACGGTTAAGCGCTGGTCCCAAAACTCTGGTTCAACCTCGATAGGAAGACCAGCGATTCACCCAGCTACGGTGGACTTAAAAGGCAAAGCATACGAGCTATTGAGACAAAATGCGCAGAAGTTCTTGATGGAAGACACGTACAGAAACCCAGGACCGGTTCAGTATGATGGACCAGGTGCAGATGCAAAGGCGGTAAGCCTGTGTGTTGAAGACCAAGATTACATGGGGAGAATCAAGAAGCTGC…	623	1	AT1G76550.1	pyrophosphate--fructose-6-phosphate 1-phosphotransferase alpha subunit, putative / pyrophosphate-dependent 6-phosphofructose-1-kinase, putative		similar to pyrophosphate--fructose-6-phosphate 1-phosphotransferase-related / pyrophosphate-dependent 6-phosphofructose-1-kinase-related [Arabidopsis thaliana] (TAIR:AT1G20950.1); similar to Pyrophosphate--fructose 6-phosphate 1-phosphotransferase subunit	93.33	180	12	0	3	542	438	617	1e-87	319
MLN2.Contig_1215	AGATTACTCAAGAACCAGCTGAAGCAGGCAACCGGTTACTGCAAAACCTCAATTGTGTGGGTTGCCCCAATATCAAAAAAGTGTTGATACCACCAGCAGCTCGATTTTATCATTTATCAACACTGAACCTTTCACTATCGGTCAATTTAAAGGAGGTTGATCTTGCCTGTTCCAACCTGGTTTTGCTTAATCTAAGCAACTGTTGCTCTCTGGAAGTACTGAAGCTTGGCTGCCCAAGATTGGCTAGTCTCTTTCTTCAGTCTTGTAACATGGATGAAGCAGGAGTTGAAGCAGCTATATCAAGATGCTGCTCGCTAGACACTGGATCTCCGTTTCTGTTCAAAGTAACCAAGCCAAAGGAAGAACGGACTGCGTCCGGCCCAAGACCGCGTCCGCATA…	632	1	AT4G33210.1	F-box family protein (FBL15)		Identical to F-box/LRR-repeat protein 15 (FBL15) [Arabidopsis Thaliana] (GB:Q9SMY8;GB:Q8GY34); similar to F-box family protein (FBL3) [Arabidopsis thaliana] (TAIR:AT5G01720.1); similar to F-box family protein, putative, expressed [Oryza sativa (japonica c	91.18	34	3	0	222	323	873	906	1e-11	65.5
MLN2.Contig_1216	GCTTATTGTCAGCATGTCCGCAAGTAAAGACGTCCTCGCACTTGCATCCCTCGAGGTTGACCTCGGTAGCATCGAACCGGGAACTACTGTGACAGTGAAGTGGCGTGGAAAGCCTGTTTTCATCAGGAGAAGGACGGAGGATGACATCAAGCTGGCTAATAGTGTGGATCTTGGAACTCTGAGGGACCCGCAAGAAGATGCTGTCAGGGTGAAGAATCCGGAGTGGTTAGTGGTGGTTGGAGTCTGCACTCCACTTGGGATGCATCCCTTTGCCGAATGCTGGTGATTACGGTGGTTGGTTTTGTCCGTGTCATGGTTCGCATTACGATATCTCAGGAAGGATCAGGAAAGGTCCTGCACCGTATAACCTGGAAGTACCAACCTACAGCTTCTTGGAAG…	511	1	AT5G13430.1	ubiquinol-cytochrome C reductase iron-sulfur subunit, mitochondrial, putative / Rieske iron-sulfur protein, putative		similar to ubiquinol-cytochrome C reductase iron-sulfur subunit, mitochondrial, putative / Rieske iron-sulfur protein, putative [Arabidopsis thaliana] (TAIR:AT5G13440.1); similar to unnamed protein product [Vitis vinifera] (GB:CAO68700.1); contains InterP	93.26	89	6	0	2	268	134	222	4e-74	165
MLN2.Contig_1217	CGAATCCGCTCATTACTTATCCGCCACCCTGACGTGTCTAATGCTGTGCTGACTCCTTACGTATCTATGTACGAGTATGTTAGTGACTCTGACGATCCCACTCATTTGTACGTCATCGGCTTACCCTACGATGCTCCGTTGACG	144	1	AT1G23010.1	LPR1 (LOW PHOSPHATE ROOT1); copper ion binding / oxidoreductase, acting on diphenols and related substances as donors, oxygen as acceptor	Encodes a protein with multicopper oxidase activity.	similar to LPR2 (LOW PHOSPHATE ROOT2), copper ion binding [Arabidopsis thaliana] (TAIR:AT1G71040.1); similar to hypothetical protein [Vitis vinifera] (GB:CAN78466.1); similar to hypothetical protein OsJ_000201 [Oryza sativa (japonica cultivar-group)] (GB:	73.33	45	10	1	16	144	399	443	1e-12	68.2
MLN2.Contig_1218	GTTTGCGGGTCACAATCAAAGTGTTACTTGCGGTGACTTCACCCCTGATGGTAAACTTATATGTACTGGCTCTGATGATGCTAGTTTGATAGTATGGAGCCCGAAGACTTGTGAAAGCATTCATGTGGTTAAAGGTCATCCGTATCATACGGAAGGGCTGATATGCTTGGATATTAACTCGAGCTCCAGTCTTGTTATCAGTGGCTCAAAAGATGGTTCTGTTCACATTGTGAACATAGTCACCGGAAAGGTGGTGAGCTCTCTGACTTCTCATACAGAGTCAGTTGAATGTGTGAAGTTTTCACCAAGCTCAGCAACTATCCCTATGGCTGCAACCGGTGGGATGGACAAGAAGCTTATCATCTGGGATCTGCAGCATTCAACTCCCAGGTTCATCTG…	572	1	AT1G71840.1	transducin family protein / WD-40 repeat family protein		similar to transducin family protein / WD-40 repeat family protein [Arabidopsis thaliana] (TAIR:AT4G02730.1); similar to unnamed protein product [Vitis vinifera] (GB:CAO64637.1); contains InterPro domain WD40/YVTN repeat-like (InterPro:IPR015943); contain	89.47	190	20	0	2	571	193	382	5e-91	330
MLN2.Contig_1219	GTCCACCAGAAACTTTAAGAAAGCTGCCAGCTTATTTCTGGATTCTATATCAACCTTCACCACTTATGAGATCTTCCCCTACGAGACCTTCATTTTTTACACCGTCCTGACGAGCATCATAACTCTCGACAGAGTTTCGCTTAAGCAGAAGGTTGTTGATGCACCTGAAATCTTGACCGTGCTTGGGAAGATTCCATTCCTTTCTGAATTCCTGAACTCCCTGTACGAGTGCCAGTACAAGGCGTTTTTCTCAGCATTTGCGGGAATGGCAGAGCAGATAAAGTTTGACCGTTACTTGAACCCACATTTCCGATTCTACATGTGGGAAGTGAGAACGGTGGTGTACTCTCAGTTTCTGGAATCTTACAAGAGCGTTACTGTCGATGCGATGGCAAATGC…	623	1	AT4G24820.2	26S proteasome regulatory subunit, putative (RPN7)		Identical to Probable 26S proteasome non-ATPase regulatory subunit 6 [Arabidopsis Thaliana] (GB:Q93Y35;GB:Q9SZX2); similar to FUS6 (FUSCA 6) [Arabidopsis thaliana] (TAIR:AT3G61140.1); similar to 26S proteasome subunit RPN7 [Capsicum annuum] (GB:ABK42076.1	96	200	8	0	2	601	188	387	1e-104	375
MLN2.Contig_122	ATAACCTATAACTATATACTATACCATATAAAACTTTTATAATAAGATTTTATAGATTTCTAAAACCCTAACTTGGGTCCTGCGTCTTTCATTTGTATTAGTATTTTCTGTGTGTGTTTTCGATATATAAAATATGAATAAAACTGAACTCGGATCTCCGACAAGCAACTCGTCTGTTTCAACGACCGGTTTACTAAACTCCGGTTCGGAGACTGATCTCCAACAACGTGATCTACTCGACGAGCGGAAGAGAAAGAGGAAGCAGTCGAACAGAGAGTCGGCAAGGAGGTCGAGGATGAGGAAGCAGCAGCACTTGGACGATCTAGCAGCTCAGGTCACGCATCTACGTAAAGAAAACGGCCATTTCATCGCCGGGATCGCCGTCACGACGGAGCACTA…	780	7	AT1G75390.1	ATBZIP44 (ARABIDOPSIS THALIANA BASIC LEUCINE-ZIPPER 44); DNA binding / protein heterodimerization/ transcription factor		similar to GBF6 (ARABIDOPSIS THALIANA BASIC LEUCINE-ZIPPER 11), DNA binding / protein heterodimerization/ transcription factor [Arabidopsis thaliana] (TAIR:AT4G34590.1); similar to bZIP transcription factor bZIP124 [Glycine max] (GB:ABI34666.1); contains	76.92	182	38	3	137	670	3	173	3e-60	228
MLN2.Contig_1220	CTACTATGTTGGCGATGATGTCGCGTGGGATGTTCGTGAAGCCAGCGAGGACGAGTCACCAGATGGTGAGGAAGGAGAAGATTGGTCTGAGAATCGCTTGTCAGGCGACGAGTATACCAGCGGACAATGTTCCAGACATGGGAGAAGAGGAAGCTTTTGAATCTTCTTCTTGTCGGAGCTCTTTCTTTACCTACTGGCTTTATGCTTGTGCCTTACGCTACCTTCTTTGCTCCTCCTGGATCAGGAGGGGGAGGTGGTGGTACACCAGCCAAGGATGCACTTGGGAAACGATGTCATTGCAGCGGAACGGCTTAAGACTCACGGTGCTGGTGATCGAACCTTGACCCAAGGATTGAAGGGAGATCCAACTTATCTAGTTGTGGAGAACGACAAGACACT…	642	1	AT4G03280.1	PETC (PHOTOSYNTHETIC ELECTRON TRANSFER C)	Encodes the Rieske FeS center of cytochrome b6f complex. Gene is expressed in shoot but not in root. Mutant has reduced electron transport at saturating light intensities and Q-cycle activity is hypersensitive to acidification of the thylakoid lumen.	Identical to Cytochrome b6-f complex iron-sulfur subunit, chloroplast precursor (petC) [Arabidopsis Thaliana] (GB:Q9ZR03;GB:Q94EI4;GB:Q9FYB6); similar to ubiquinol-cytochrome C reductase iron-sulfur subunit, mitochondrial, putative / Rieske iron-sulfur p	75	44	11	0	9	140	19	62	3e-91	71.6
MLN2.Contig_1221	GGTTTGAGGCGTCTCCGTCGTGTTCTCTGATGGTGGCTGCGCGGGGGTTGTTGGTGACTGGTGGAGACGTCTGTCTGTTCTCTGACCTCCCCTGTGGCTCGCGTAGTAGTGTGTGGGTTCCCGTGTGTTCCCTTCACCGCTCAGATCTTATGGCGTCGACTGTGTGGCCTGCTCCGTAGCCATCTTCTTCTCAAATAATCTCAGCAGCTTTGTTTTGTGGCTAGGCAGTGTCTTCCGGCTGGTCTTTTACTCGGAGTAATAGCTAGGCAGCGGCTCATTTGCGTGGTGTCGGTTTTGTCTCCTCCGGAGGAGTTGTGCGTTTACCGATCCATATTCTCTTCGGGTTTGTGGTTAAATGGGTGTAGACGGTCCTGGTGGAATGCAATGGAGGCGGTAATC…	615	1	AT2G15900.1	phox (PX) domain-containing protein		similar to phox (PX) domain-containing protein [Arabidopsis thaliana] (TAIR:AT1G15240.1); similar to hypothetical protein [Vitis vinifera] (GB:CAN82375.1); similar to phox domain-containing protein, putative, expressed [Oryza sativa (japonica cultivar-gro	27.12	59	43	2	364	540	17	66	4.3	28.1
MLN2.Contig_1222	GAGTTTTAGGGATTTCAAGAAACAATATGTTCAAGGTTTGCTTAGGTAGTGATCTCTTTCTTGTGTGTTGACTTGCAGGAGAAGGCAGCTTTCATATTCTGTGTTGAGATAGAGCTCTTCTCTGTAGAGACTGCGATGAGGCGACCCATGCGCCTAATACTCGCTCTGCTAACCACCAGAGGTTCTTGGCTACTGGAATTCGAGTCGCTTTGAGTTCCACTAGTTGCAGCAAAGAAGTGGAGATGAATCATTTCGACCCACCTAACCAGCAGATTCTCTCTAAACCAACAATTCAACAGTCTGCTGCTCCATCTCCTCCATGGGCTAGCGATGAGTTCTTCCGTTACTCTGATCTTGAGTGCAGTAACAAGGTGAGAAATGGTTTACCAAATATGTGAG…	563	1	AT2G31380.1	STH (salt tolerance homologue); transcription factor/ zinc ion binding	a B-box zinc finger protein that interacts with COP1. contains a novel 11 amino acid motif at the C-terminus (also found at the N-terminus of HY5) that is involved in the COP1 interaction.	Identical to Salt tolerance-like protein (STH) [Arabidopsis Thaliana] (GB:Q9SID1;GB:Q9C558); similar to STO (SALT TOLERANCE), transcription factor/ zinc ion binding [Arabidopsis thaliana] (TAIR:AT1G06040.1); similar to salt tolerance protein [Brassica rap	66.47	173	57	2	48	563	51	198	1e-56	215
MLN2.Contig_1223	CGTCCACGAGCACGTGACAAGAAGCTTCAACAAGAATGGGTTGTCCCACTGAAAAGCGTTGAAGATATTCAGGAGAAATTCAAGGAGCTGTGCCTTGGAAACTTGAAAAGCAGTCCATGGTCTGAGCTGGACGGACTCCAGCCAGAGACAAAGATCATAAACGAGCAGCTGGTGAAAATCAACTCCAAAGGCTTCTTGACCATCAATAGCCAACCATCAGTCAACGCAGAGAGATCTGATTCCTCAACTGTTGGATGGGGCGGTCCTGGTGGGTATGTATACCAAAAGGCTTACCTAGAGTTCTTCTGCTCAAAGGAGAAGTTAGATGCAATCGTTGAGAAATGCAAAGCTTTGCCATCTATAACTTACATAGCTGTCAACAAAGGAGACAACTGGGTA…	536	1	AT2G44160.1	MTHFR2 (METHYLENETETRAHYDROFOLATE REDUCTASE 2); methylenetetrahydrofolate reductase (NADPH)	methylenetetrahydrofolate reductase MTHFR2 mRNA, complete	Identical to Methylenetetrahydrofolate reductase 2 (MTHFR2) [Arabidopsis Thaliana] (GB:O80585;GB:Q56ZL2;GB:Q94JZ1;GB:Q9SE59;GB:Q9SUJ0); similar to MTHFR1 (METHYLENETETRAHYDROFOLATE REDUCTASE 1), methylenetetrahydrofolate reductase (NADPH) [Arabidopsis th	93.82	178	11	0	1	534	372	549	1e-97	351
MLN2.Contig_1224	GCCGCTTGCTTAGCGTTACACTACGCTAATGTCATCATCGTGATAGAGAGATTCGTTGCATCTCCCCACTTGATAGGCGACGATGCGAGAGACGACCTTTACAACATGTTACCAGCGAGCGTGAGAAAATCGCTGAGAGAGAGGCTAAAGCCGTACTCGAAAAACTTAAGCTCTTCCGCGGTTTATGATCCAGGGCTAGCGAAGGAGTGGACAGACGCAATGGCGGGCATCTTGGAATGGTTGGGTCCGTTAGCTCACAACATGATAAAATGGCAGTCCGAGAGGAGCTACGAGAACCAGAGCTTGGTTTCGAGGACGCACATAGTTCTTGCGCAAACTCTCTTCTTTGCGAACCAGCAGAAAACAGAAACCATCATCACGGAGCTTCTTGTCGGGCTC…	540	1	AT5G04550.1			similar to unknown protein [Arabidopsis thaliana] (TAIR:AT3G23160.1); similar to unnamed protein product [Vitis vinifera] (GB:CAO46545.1); contains InterPro domain Protein of unknown function DUF668 (InterPro:IPR007700)	95.15	165	8	1	4	498	436	599	1e-86	315
MLN2.Contig_1225	TCAAGAACCACGCTATTAAAATCTCACAGCTTGACCCTGGTTTCAAAACCCTTATACCTGACTTATATAGAGGAAAGGTTGGTCTTGATGCTGCAGAGGCAAAGCATTTAATGGATGGCCTTGACTGGCCAGGTGCTGTCAAAGATATCAGCGCTTCTGTTAATTGGCTTAAAGCTAATGGCTCCAAAAAGGTTGGTGTGACTGGAATGTGCATGGGAGGTGCACTAGCTATAGCTAGCTCTGTTTTGATTCCAGAGGTTGATGCTGCTGTTGGATTCTATGGAACTCCTTCCTCTGAGCTTGCAGATCCAGCACAAGCCAAGGCACCTATTCAGGCCCATTTTGGAGAGCTTGACCATATTGTTGGTTTCTCTGATGTCACGGCAGCAAGGAATCTCG…	565	1	AT2G32520.1	dienelactone hydrolase family protein		similar to dienelactone hydrolase family protein [Arabidopsis thaliana] (TAIR:AT1G35420.1); similar to hypothetical protein [Vitis vinifera] (GB:CAN60148.1); contains InterPro domain Dienelactone hydrolase; (InterPro:IPR002925)	90.86	186	17	0	3	560	45	230	4e-96	347
MLN2.Contig_1226	ATCGAAGTCGGTGATCTTTATGCAGAGGAGGAGAGGAACTTCTTGGTGGATCTTGATGTTCCCGTTGTGGATGGGGTTTTGGATTCAATGTCGTTGCTCAAGGTTGGATGCGTTTACAGAGACCCCGTGACGAAAGAGACGGTTGATTTGAGTAATTCCGGCGAAGTGAAGATTCTCAGACCGGTGTTGGAACATAGACCTGTGGTGTCTGTTGAAGTTGACAGGCAAAAAATTAGGTTGCGTGCGGGGGAAGCAATCTCTGAAGCTAGGGTTTTAGCTGAGCGGGGGGATTTAACCGGAGCTGTTCCGGTTTTAGAGACTTGTCGTGGGGTTTTGTCGGAGACTGTGTCGGGAAGAGCGGGAGATGCGTTGTGTGTGTCGCTGTGTGCAGAGCTGAAG…	584	1	AT5G60710.1	zinc finger (C3HC4-type RING finger) family protein		similar to zinc finger (C3HC4-type RING finger) family protein [Arabidopsis thaliana] (TAIR:AT3G54780.1); similar to zinc finger (C3HC4-type RING finger) family protein [Arabidopsis thaliana] (TAIR:AT2G38970.1); similar to hypothetical protein [Vitis vini	85.71	196	26	1	1	582	477	672	1e-81	298
MLN2.Contig_1227	AAGATAAGGAGAAGAAAGATGAAGATGTATCACAAGAAGAAGAAGAAGGTAATAAAAAGAAGAAGAAAGAGAAGGATGAATCAGGTGCAGACGGAAAAGACAAGAAGAAGGATAAAGAGAAGAAACCGAAAGAAGAATCC	140	1	no significant hit
MLN2.Contig_1228	TACGAGTACATGCCTAATGGGAGCTTAGCTGATGTGTTACACAGCCACTGCAAAGGCGGGGTGTTGTTGGGCTGGCCTGAACGGTTAAGGATCGCTTTGGACGCAGCTGAGGGTTTGTCATACTTACACCACGATTGTGTTCCTCCGATCGTGCACCGTGACGTGAAGTCTAGTAACATATTGCTAGATGCAGATTATGGAGCCAAAGTAGCTGACTTTGGGCATTGCAACAATCGGTCAAATGAGCGGTACTAAATCGCCAGAAGCTATGTCTGGAATCGCTGGTTCTTGCGGTTACATTGCACCAGAATACGTATATACACTCAGGGTGAATGAAAAGAGTGATATCTACAGTTTTGGTATCGTGCCTTTGGAGTTGGTAACGGGGAAGCAACCAAC…	592	1	AT4G28490.1	HAESA (RECEPTOR-LIKE PROTEIN KINASE 5); ATP binding / kinase/ protein serine/threonine kinase	member of Receptor kinase-like protein family	Identical to Receptor-like protein kinase 5 precursor (RLK5) [Arabidopsis Thaliana] (GB:P47735); similar to leucine-rich repeat family protein / protein kinase family protein [Arabidopsis thaliana] (TAIR:AT5G25930.1); similar to HSL2 (HAESA-LIKE 2), ATP	93.24	74	5	0	1	222	766	839	5e-94	147
MLN2.Contig_1229	GATCGTCAAAGCAGTCATCTGAAACCAAAGCTTTAGAGAAAGAGAGTAGAGATGAGGTTGTTCGATCCATGGCCAGTGTTCTTCAAGAGGGAGTGGAAACGTTGCTGGCCCTTTCTCACCGGATTCGCCGTAACCGGCGTCCTCATCACCAAGCTCACCGCTGGATTCACTGAGGAAGACGCCAAGAACTCCAAGTTCGTCCAGCAACACAGGCGGTGATTTACTCAAGTGAACTCTATTGCTGAGAGTGCTTTCAGACTTTATTCTAATAAACATAAAAGAGAGAATCCTACATACTTCTTGTTGATCTCTCGTTTCCTTTCATCTTTTGTCTTTTCACAACTCTCGAAACAGTGTTAAGTTTGAAATGGTTTGATTCCAATCTTTTCCCCCT	394	1	AT5G59613.1			similar to unknown protein [Arabidopsis thaliana] (TAIR:AT3G46430.1); similar to mitochondrial ATP synthase 6 KD subunit [Oryza sativa (japonica cultivar-group)] (GB:BAB21526.1)	98.18	55	1	0	52	216	1	55	3e-28	120
MLN2.Contig_123	GCTCTCCGTCGCGCTTCATTCTTCCTCTCTCTCAAACTCGCCCATCCTCTATCGATTCCGATTTCGATTTCCCAGATGGGAACTCCGGAGTCATCACGAGAGCCGTGCCCTGACCGTATCCTCGACGACATCGGCGGCGCCTTTGGTATGGGAGCCGTTGGAGGATCCGCCTTTCACTTCCTCAAAGGAACCTACAACTCCCCCAAAGGCAGTCGCTTTCTCGGCGGCAAACAAGCTGTGGCCATGAACGCTCCTCGTTTGGGAGGGAGTTTCGCCGTCTGGGGAGGTCTCTTCTCGACGTTTGATTGCTCCATGGTGTACCTTAGGCRGAAGGAGGATCCGTGGAACTCGATTATAGCAGGCGCTGCCACCGGTGGGTTTCTGTCTATGCGTCAGGGG…	793	2	AT2G37410.2	ATTIM17-2 (Arabidopsis thaliana translocase inner membrane subunit 17-2); P-P-bond-hydrolysis-driven protein transmembrane transporter	Mitochondrial inner membrane translocase. Together with AtTIM17-1, TIM17-2 has a long C-terminal extension not present in other TIMs. The extension is located in the outer membrane and so TIM17-2 links the inner and outer mitochondrial membranes. The C-te	Identical to Mitochondrial import inner membrane translocase subunit Tim17 (TIM17) [Arabidopsis Thaliana] (GB:Q9SP35;GB:Q9ZUS5); similar to ATTIM17-1 (Arabidopsis thaliana translocase inner membrane subunit 17-1), P-P-bond-hydrolysis-driven protein transm	66.8	244	54	3	76	726	1	243	2e-59	225
MLN2.Contig_1230	CCCTCAGCTTATTCCGCAAACTGGGTTTTGAGGACTCTTCTCACAGTGAAATCTTCAAAGAGGTTACACTAGAGTACACGGTGACAAATCTCCGTCGAGCAGAGCTCTTGAAGTCATTGGATGATGTTGTCACGCGCACACAATCTTCGGACAACAAATCAGTTCCGCTGCTAACAGGAGAAGCTATTGGATAATGTGCTTATTATTTGTTAGAGAATAGAGATCATGTATCGTGCCTGATGTTAGCAGGAAGGACGACTTTATGGAGCTTCTAACGAACCATAATATGTGAGGTTATGAACAAGAGAAAACTCTATTTTATAAGCCATAATAAGAAGCTTAAAACAATTGCAAACTANN	360	1	AT2G04845.1	GCN5-related N-acetyltransferase (GNAT) family protein		similar to unnamed protein product [Vitis vinifera] (GB:CAO41210.1); contains InterPro domain Acyl-CoA N-acyltransferase (InterPro:IPR016181); contains InterPro domain GCN5-related N-acetyltransferase; (InterPro:IPR000182)	73.77	61	16	0	3	185	156	216	4e-18	86.3
MLN2.Contig_1231	GGGGTCCAAACCACTATGACAGAGTACACGACCGGGAAAGTAATAGTGACCGGGACAATGGACGAAGAGAAACTTGTTGATTACGTCTACCGTCGGACCAAAAAGCAGGCCCGAATCGTACCCCAACCCGACCCGGAACCTGAAAAGTCTGCGGCCGAGGAAGACAAGAAGGAGGAGAGCGGTGAAGGACCTGAGAAACCCGCGGAAGAAACCGGAGGCGAGAAGGAGGAGGAGGAGAAGAAGGAAGAAGAAGACGGTGGCGGAGAAGAGACGGAGGTTACCGAGGAGATGGCTATGAAGAAGATGACAGGGGTGAAGAGTAAGCAGATGTTTATGTGGGTTCCGATTGTGGAGATGAGTATGGAGGAGCCAAAGAGCAAGAAGATCTACTTCAAGACT…	480	1	AT4G24130.1			similar to unknown protein [Arabidopsis thaliana] (TAIR:AT1G56580.1); similar to unnamed protein product [Vitis vinifera] (GB:CAO62919.1); contains InterPro domain Protein of unknown function DUF538 (InterPro:IPR007493)	91.94	62	5	0	295	480	94	155	8e-29	122
MLN2.Contig_1232	GACGTTAAATAACCTGCCGCCACCATTCGCCAAAGCGAGCCAGCTCATAACCGACTTCGCCAATAGAAACCTCAACATCACCGACCTAGTTGCACTTTCAGGTGGCCACACCATCGGAATTGCGCATTGTCCCTCGTTCACAGGCCGGCTCTACCCGAACCAAGACCCAACCATGAACAAGTTCTTCGCCAACAGCCTCAAACGAACGTGTCCCACCGCTAACTCGAGCAACACACAAGTGAATGACATAAGAAGTCCCGATGTTTTCGACAACAAGTACTACGTTGATCTCATGAACCGACAAGGGTTGTTCACTTCTGACCAGGATCTGTTCGTGGACAAGAGGACACGTGGTATTGTGGAGAGCTTTGCGATTGATCAAAGGCAGTTTTTTGATCA…	646	1	AT1G71695.1	peroxidase 12 (PER12) (P12) (PRXR6)		Identical to Peroxidase 12 precursor (PER12) [Arabidopsis Thaliana] (GB:Q96520;GB:Q43734); similar to peroxidase, putative [Arabidopsis thaliana] (TAIR:AT4G08770.1); similar to peroxidase [Nicotiana tabacum] (GB:AAK52084.1); contains InterPro domain Plan	92.86	182	13	1	2	547	178	358	4e-93	337
MLN2.Contig_1233	AGTCGTCTCCGGCTTCTTCGTCTCTCCCGGGGAACACCGTCCTCGCTCCACGGAGGATTACCCTCAGCCGGAGCCCCTTCCGCCTCCGGTTCAGCTCGGAGAAATCACGGAGGAGGAGCTTAAGCAGTACGACGGCTCAGATTCAAAAAAGCCCCTTCTCATGGCCATCAAAGGCCAGATCTACGATGTTTCCCAGAGCAGGATGTTCTATGGACCAGGTGGACCATACGCTCTGTTTGCAGGGAAAGATGCAAGCCGAGCTCTTGCTAAGATGTCCTTTGAGGAAACCGATTTGACCGGAGACATCTCTGGTCTTGGTCCATTTGAGCTAGATGCGTTGCAAGACTGGGAGTACAAGTTCATGAGCAAGTATGTCAAAGTCGGGACCATTCAGAAGAA…	570	1	AT3G48890.1	ATMP2 (MEMBRANE STEROID BINDING PROTEIN 2); heme binding / transition metal ion binding	putative progesterone-binding protein homolog (Atmp2) mRNA,	Identical to Putative steroid-binding protein 2 (MP2) [Arabidopsis Thaliana] (GB:Q9M2Z4;GB:Q9XFM5); similar to MSBP1 (MEMBRANE STEROID BINDING PROTEIN 1) [Arabidopsis thaliana] (TAIR:AT5G52240.1); similar to hypothetical protein [Vitis vinifera] (GB:CAN6	80.3	198	26	3	2	556	37	233	6e-68	253
MLN2.Contig_1234	GAATCACAACAAGTTCAATCGGATCTTCTTGAGAAGAGAGAGAGAATCAACGAACTGACCAGAGGGACCAATGATGGTGGCGATCCAATGGTAGAGATTATCTCCTTTGGGTCCAGCTGAGCATTCGGGAGGCGGATCGACGTTAAGTTCAGCCATCTCTCTCTGTATCCTCTTCCCAGACGCGGAAACCGATGTCTTCGCTACCCAAGACGACGCCGTTCCTGAGTATCCGGCGTACATCGCCGTCGGTAACGGCTTAAATCTCCCGCTTCCGCCTGGTGTTGTCATCATCTCTTGTCCTCTTCGTCCCTAGTCCTCCTCTGCTTATCCAATCCATTTACTTCTTCACCGTTTCGCTTCAACTCCATCGAGAGAATAATGTTCGAAACGCTGCGTTTC…	544	1	AT2G27510.1	ATFD3 (FERREDOXIN 3); electron carrier		similar to ATFD1 (FERREDOXIN 1), 2 iron, 2 sulfur cluster binding / electron carrier/ iron-sulfur cluster binding [Arabidopsis thaliana] (TAIR:AT1G10960.1); similar to non-photosynthetic ferredoxin [Citrus sinensis] (GB:CAA87068.1); contains InterPro doma	35.42	48	31	1	125	268	51	95	0.32	31.6
MLN2.Contig_1235	CTAGGTTGAGAGTTGTCTACGTTGATCCACCACGACCACCGTCACCGGTGCGTGAAGGGTCAGAAGAGGGCTCTTCGCCAAGAGCTTCCGTTTCTGACAATGGGGCTTCTGATTTTACTGCTGCTCCAAGATTTAGCGTGGACAGGCTTGAACCTCAGGAAAACTCAACTGAGGCGAGAGCTCTCATCACAAGGCTCACGGAGGAAAAGAACTCTGCGATTCAACTGAACAACAGACTTCAACAAGAATTGGAGAAGTTGAAGCGTGAAAGCAAGAGAAGTCAGAGTGGTGGTGGGATACCGTTCATGTACGTTCTTCTGGTGGGACTAATCGGCTTAATCTTGGGATACATTATGAAGAGGACATGATCTCGTTTGAAAAATACAAAGTATTCGACAA…	443	1	AT2G45140.1	vesicle-associated membrane protein, putative / VAMP, putative		similar to VAP27-1 (VAMP/SYNAPTOBREVIN-ASSOCIATED PROTEIN 27-1), protein binding [Arabidopsis thaliana] (TAIR:AT3G60600.1); similar to unnamed protein product [Vitis vinifera] (GB:CAO24545.1); contains InterPro domain VAMP-associated (InterPro:IPR016763);	86.07	122	16	2	3	365	119	239	3e-43	170
MLN2.Contig_1236	AGCTCACATCCCACTGTACCTTTACCCCTTCCTGAACACAACGAGTAAGTCAAGACCTTTCGAGTACTTGCGCCTTACTAGCTTAGGTGTCATTGGTGCTCTTGTTAAGGTTGATGATACAGAGGTCATTAGCTTCCTTCTATCAACCGAAATTATTCCTCTGTGCCTCCGCACCATGGAGATGGGGAGCGAGCTGTCGAAAACTGTTGCCACATTCATAGTTCAGAAGATCTTGTTGGATGATGTGGGGATGGATTACATCTGCACAACAGCGGAGCGCTTTTTCGCTGTTGGTCGAGTGTTGGGAAACATGGTTCAGTCACTTGTGGAGCAGCCTTCTCCACGCCTTTTGAAGCATATCATTCGTTGTTATCTCCGTTTATCAGACAACCCAAGGGC…	591	1	AT3G20800.1	rcd1-like cell differentiation protein, putative		similar to rcd1-like cell differentiation protein, putative [Arabidopsis thaliana] (TAIR:AT5G12980.1); similar to unnamed protein product [Vitis vinifera] (GB:CAO38914.1); contains InterPro domain Cell differentiation proteins, Rcd1-like (InterPro:IPR0072	97.34	188	5	0	2	565	129	316	6e-103	369
MLN2.Contig_1237	GGATTCAGCCCGAGTCCAGTCTCCGGTTATGGAGTTAAACCTGAAGTTAGGTACAGTCCAGGATTAGGTAATAGGGGTGGTGGATTCTCACCGTTTGGACATGGATATGGAATTGAGCTGAACTTTGAGCCAGATCAGAGCCAGAACTTTGGATCTGGTTCCAGTGCAGGCTTTGGACGTCCCTTTAGCCCAGGATATGCCGCGAGGCTTGGCAGGTACGGTAGCCAGATTGAGTCAGGAGGAGTTGGAAAGGCTCTGTGTTAAATGCAGCAACAAAGAACAGTTATGGGGTAATGGTGGTGGTCTGGGTTACATGTCAAACTCACCAATATCTAGAAGCAGCTTCAGTGGAACGTCTTCACTAGGCAGCATCGGAGACAACTGGGGACGTAATAGCTA…	599	1	AT5G47620.2	heterogeneous nuclear ribonucleoprotein, putative / hnRNP, putative		similar to heterogeneous nuclear ribonucleoprotein, putative / hnRNP, putative [Arabidopsis thaliana] (TAIR:AT3G07810.1); similar to heterogeneous nuclear ribonucleoprotein, putative / hnRNP, putative [Arabidopsis thaliana] (TAIR:AT3G07810.2); similar to	75.31	81	20	1	1	243	215	294	3e-41	114
MLN2.Contig_1238	GATTATCGTTGGGATGCGATGATAAGGGTGGAATCGAGCAAGAGGAATCATCCGGCAGCGAGGTTGATGTCGGCGTTGATGGATCTGGAGCTTGAGGTGAACCACGCGAGTATGTCGGTGGTTAACGATCCGATGATACAGCAAGCGACGGTGAAGATGGGATTCAGAATATACACGCAGGAACAGCTCCGGGCGAGTTTAATCTCAAAGATTGGTTAAAAGTAAAGATTAAGAAAGTGATGGGGTCAAAATCATAAGTAATTCGTTTTAGTTGGGGTTCCAGTAATTTTGTAGCTTGTAGCTATTATGTAAGAAAGTCCAAAAGTAGAGCGACAAGTTTGTTTCGCTCTCTCTCTCTTAGTCTGTATCGTTTGTTGTTTCGTCTCCAATATGTAACGT…	433	1	AT1G32640.1	ATMYC2 (JASMONATE INSENSITIVE 1); DNA binding / transcription factor	Encodes a MYC-related transcriptional activator with a typical DNA binding domain of a basic helix-loop-helix leucine zipper motif. Binds to an extended G-Box promoter motif. Its transcription is induced by dehydration stress and ABA treatment. Negative r	Identical to Transcription factor AtMYC2 (BHLH) [Arabidopsis Thaliana] (GB:Q39204;GB:O48644;GB:Q8W2F4;GB:Q9LPJ8); similar to basic helix-loop-helix (bHLH) family protein [Arabidopsis thaliana] (TAIR:AT4G17880.1); similar to phaseolin G-box binding protei	98.55	69	1	0	10	216	555	623	8e-32	132
MLN2.Contig_1239	GTCATTCTCAATCTGATTCATTCTCCAATCTAATATCCATCTCTCTCTCTCGAAACATGTCTGACGAAGAGCACCACTTCGAGTCCAGCGACGCCGGAGCTTCCAAGACCTACCCTCAGCAGGCTGGTAACATCCGTAAAGGTGGTCACATCGTCATCAAGGGCCGTCCCTGCAAGGTTGTTGAGGTTTCGACTTCGAAGACTGGTAAGCACGGTCACGCGAAGTGTCACTTCGTTGCTATTGATATCTTCACTGCTAAGAAGCTCGAGGATATTGTTCCCTCTTCCCACAATTGTGATGTTCCACATGTGAACCGTATTGACTACCAGTTGATTGATATCTCTGAGGATGGCTTTGTTAGCCTTTTGACCGACAGTGGTGGCACCAAGGACGACCTCA…	600	1	AT1G26630.1	FBR12 (FUMONISIN B1-RESISTANT12); translation initiation factor		Identical to Eukaryotic translation initiation factor 5A-2 [Arabidopsis Thaliana] (GB:Q93VP3;GB:Q9LQY9); similar to eukaryotic translation initiation factor 5A, putative / eIF-5A, putative [Arabidopsis thaliana] (TAIR:AT1G69410.1); similar to eukaryotic	90.57	159	15	0	57	533	1	159	1e-77	285
MLN2.Contig_124	CGTCTGGTTTCACATTCCACGTTGAGGTGGCCAAAGAGAACTGGCAAGAACTTGTGAGTAAGATTAAGTCTGCAGGGATGAGGCCAGGTGTGGCTCTAAAACCTGGAACACCTGTTGAAGAAGTCTATCCCCTGGTTGAAGGGGAAACTCCGGTAGAAATGGTGCTAGTGATGACAGTGGAGCCTGGATTTGGAGGTCAGAAGTTCATGCCCAGCATGATGGACAAGGTCCGGGCACTGAGGCAGAAGTACCCAACGCTAGATATTGAGGTGGACGGAGGGTTAGGGCCTTCGACTATAGAAGCAGCGGCTGAAGCAGGGGCCAACTGTATCGTAGCTGGAAGTTCAGTGTTTGGAGCTCCGGAGCCAGGGAAAGTCATTTCCCTTTTGCGGACCAGTG…	541	1	AT3G01850.2	ribulose-phosphate 3-epimerase, cytosolic, putative / pentose-5-phosphate 3-epimerase, putative		similar to ribulose-phosphate 3-epimerase, cytosolic, putative / pentose-5-phosphate 3-epimerase, putative [Arabidopsis thaliana] (TAIR:AT1G63290.1); similar to unknown [Populus trichocarpa] (GB:ABK96131.1); contains InterPro domain Ribulose-phosphate bin	90.65	139	13	0	3	419	86	224	3e-69	257
MLN2.Contig_1240	GGACGGTTAAGCGAAATCTCCGGCGAAGCTATGACGACAATCAGTCTCCGCAAGCAAAACACGAGACTCCCACCGGAGGTGAACCGCGTGCTCTACGTCCGTAACCTCCCATTCAACATAACGAGCGAGGAGATGTACGATATCTTCGGCAAGTACGGCGCGATTCGCGAGATTCGCATCGGATGCAACAAGGACACGAAAGGTACTGTCTTCGTCGTTTACGAGGATATCTACGATGCTAAGAACGCCGTCGACCATCTCTCGGGCTTCAACGTGGCGAATCGGTACTTGATTGTGCTGCACTACCAGCACGCGAAGATGAGCAAGAAGTTCGATCAGAAGAAGAATGAGGAAGAGGTTGCTAAGTTGCAGGAGAAGTATGGTGTCTCTACTAAAGAT…	560	1	AT5G12190.1	RNA recognition motif (RRM)-containing protein		Identical to Pre-mRNA branch site p14-like protein [Arabidopsis Thaliana] (GB:Q9FMP4); similar to RNA recognition motif (RRM)-containing protein [Arabidopsis thaliana] (TAIR:AT2G14870.1); similar to hypothetical protein [Vitis vinifera] (GB:CAN62387.1); c	91.94	124	10	0	31	402	1	124	1e-62	235
MLN2.Contig_1241	GGAGGACATTATCTGGTGGCGATGGATCAGGAAGATTGGAGATCACAGAGATTCAAGAGGAAACAGAACATCAACATATCGGACAAGAAGGGAACTAGGAAACTCAAATACTTAATGATGTTTGCTTGTAAGAAACTTATACGTACGTACCTTAATTTAATGATAGTTATAAATCAAACCCTTGTTACACAATTAGAGCTCAGTCATTGTGGTTGCTTACCTTATTAAGTAGTATATTGAAACTTTTATG	250	1	AT5G41540.1	disease resistance protein (TIR-NBS-LRR class), putative		similar to disease resistance protein (TIR-NBS-LRR class), putative [Arabidopsis thaliana] (TAIR:AT5G41750.2); similar to disease resistance protein (TIR-NBS-LRR class), putative [Arabidopsis thaliana] (TAIR:AT5G41750.1); similar to disease resistance pro	45.95	37	16	2	97	195	673	709	0.45	29.6
MLN2.Contig_1242	GAAGCTTATCTTCATGGCATCTCTCTCCATGGCTTCCGTGATCCTCAGATTCTCTCCTCTACGCTCTTCTTCCCCAAAGATTCCCACTCACGGCGGGTCCGTTCAATTCGCTCGACTCAGCTCCTCGAGCCTCGCCTCGACTCACAGCATATCTGGGCTTCGTGCGGTTCTTCCTCAGAAGATATCCACAGTCGTTTCTCAGAATCCTCAAAGGCTTCGGTCTCTTACTGTCTTCGCTCATAAGGGATATAAGATGAAGACCCACAAGGCGTCAGCGAAACGGTTTAGAGTAACGGGGAGGGGGAAGATAGTGAGGAGGAGATCGGGAAAGCAGCATTTGTTAGCTAAGAAGAACAACAAGAGGAAGCTCCGTCTTTCCAAAATGCACGAAGTTAGCAG…	578	1	AT2G24090.1	ribosomal protein L35 family protein		similar to unknown [Populus trichocarpa] (GB:ABK93832.1); contains InterPro domain Ribosomal protein L35; (InterPro:IPR001706)	77.33	150	33	3	14	460	1	145	2e-42	168
MLN2.Contig_1243	CTATTGGGATCTCTTTCTCCGCCGTGATCTTTGATTCATCGGTGGAACATAAGACTAGCGAGCTGGATCGTGGTTTGGGACGCAGCGCGACGGAGCTTGATCTGTTGAGTGGAAGACTCAACGGCGGCGATAAGGACTGGTTAAGAGAGATACGTGCAACATTTCCCGACGGAGAGATGGTGAAAATGGAGTTAGAGGCAGCCATTTTCGATTGATCTCGAGAGAAGGGGACGGAGACTTCGAAGAGTGTTTCGAAAGAGCTTCCAACGGAAACGATGGTGTGTGATATATTGGGCCTTTTCTTTAGTAGGCCTATATTGGGCTTTTTGTTCAACGCAGCTAAGCCCACGAAATTTTATTAGTATTTTACTATTTTTCAACTATTTCTATTGTGGTTTT…	492	1	AT5G41790.1	CIP1 (COP1-INTERACTIVE PROTEIN 1)	encodes a protein that physically interacts specifically with the putative coiled-coil region of COP1 in vitro. In hypocotyl and cotyledon protoplasts, it is associated to the cytoskeleton, but not in the root. expression is not regulated by light.	similar to myosin heavy chain-related [Arabidopsis thaliana] (TAIR:AT1G64330.1); similar to unnamed protein product [Vitis vinifera] (GB:CAO65832.1); contains InterPro domain Prefoldin (InterPro:IPR009053)	26.92	78	57	1	51	284	1076	1139	4.8	27.3
MLN2.Contig_1244	GAACCAAGGCTGCGTTTCTAGCAGCCAAACTCTCATCTTTATGAATATCAGTTTTATAAACATTTAACTCTTGCAGACAATCTCAGCTTCCTTCTTCTCTTTACTTTCTTGTTCAATAAAGCTTTAATAAGCTATCTCCATTTCTGTTTAAATAAAGCTCTTTGAGCATTTTGTACATTTGTTCTCAACCGCATCCTCCATTTTTTCCAGTCGCTGCGTCAACTTCAACCCAGCAAATACGACGCTCGAAATTTCAGCGGCAACAGCGATTCCGTTTTCATGTCTCCGATTGTCCGTAGCGGCTGTTTTTAATCAGAACATCAAAAAATTTCCTCCTGCTCTAGCTTTATTTTCTGCCGCTGTCGCTAGTCGTGGCGTTTACTAGCGGCGTTTATAAAA…	503	1	AT1G07160.1	protein phosphatase 2C, putative / PP2C, putative		similar to protein phosphatase 2C, putative / PP2C, putative [Arabidopsis thaliana] (TAIR:AT2G30020.1); similar to protein phosphatase 2C [Medicago sativa] (GB:CAA72341.1); contains InterPro domain Protein phosphatase 2C-related; (InterPro:IPR001932); con	37.5	32	20	0	179	274	12	43	6.7	26.9
MLN2.Contig_1245	GCCGATGAATACTTCCAATTAGCGGATTTATCTCTATTCCGGTAGCGGAATTATTTTCGCGTTGGCGACTTTTGAAGTGTCTTCTTCAATCACCATCGAGCTGATCTTCACTCTCATCCTTCTCGGATCGTGGTTGAAGATAATAATCTCCAATCATTTGATCGATGATAGTACTATATGTCGCTTTCCATCAACTTTCTTCTATATCCTGTTGGTGATTGATCGGAATCACTTGGTTTCACCGCTCATCTTGCCAACTTCCTAAGAGAATTAGTCTCTCTCTGTTGATTTAGCCGGCTTGGCTTTAAAGAGAGCTTCTCAGATCGGGAGCTGTGTGGGTTTGAAGGATTATGTAGTTAGCCTTGGAGTAGATCAAGAAGAGTTGGCGTCTATGACGGT…	501	1	AT2G24130.1	leucine-rich repeat transmembrane protein kinase, putative		similar to leucine-rich repeat transmembrane protein kinase, putative [Arabidopsis thaliana] (TAIR:AT3G47580.1); similar to unnamed protein product [Vitis vinifera] (GB:CAO66636.1); similar to putative protein kinase Xa21, receptor type precursor [Oryza s	30.59	85	57	2	206	454	446	529	0.78	30
MLN2.Contig_1246	GGAGGACAATCTTGGAGGTTTCCCCTCCGGTCGGAAAGAGAAAGACGTTGGATTCTAAAAAACTGGATAAGGAAAGAAAGATCGACTAGTTCCGAGAGAAATGACCATGGTTAACGTTGAAGATGAGTCCGTCCATGGTGGTGCTGGCGACGGTGACGGCACCGTGAATGATGACATCGCCGGATCTGTCGCTGGAGAAATTGGATTATCAGCTAAGAAGCTGATTCATGAAGCTTCTAGGTCCATGGAACTCGCTTCCTCTCAGCCAGATGCTTCAACAATCCTTCCTACTCAACTTACTGTTTTATTTGGTAGGAAAATTCAAAATCATCCGTATTGTTACTGCTGCTGCTAAATCCATTGAGACAAAGACTTCTGGTCCTGTCGCTTCTCCAGCAC…	632	1	AT5G20900.1	JAZ12/TIFY3B (JASMONATE-ZIM-DOMAIN PROTEIN 12)		Identical to Protein TIFY 3B (TIFY3B) [Arabidopsis Thaliana] (GB:Q9C5K8); similar to JAZ11/TIFY3A (JASMONATE-ZIM-DOMAIN PROTEIN 11) [Arabidopsis thaliana] (TAIR:AT3G43440.1); similar to ZIM [Medicago truncatula] (GB:ABN08340.1); contains InterPro domain	38.67	75	43	5	107	322	1	66	3e-06	36.6
MLN2.Contig_1247	GTGGTGGTCATCTTCCTCCCAAGCCACAAAAGGTTGGTCCATCGGTAGAGTCAGGACAACCCTCGCGACAGCCTGAGACTCCCTCAAAACCAAAGAGACATAACGATGCGTCGATGGAAGTGGATGGAGAAGAAGGACGGTGTTCAAAAGATCTCGAACTCAAGCTCTAGTACATATAAAAGGTCATGTTTGGAGTTTAACTTATTTAGGATTCGAAGCCACATAATAAATGTTTAGATTCTTTGAGGTTGTATTACGTAGTCATACATACATACTCGTTTCG	283	1	AT1G72450.1	JAZ6/TIFY11B (JASMONATE-ZIM-DOMAIN PROTEIN 6)	JAZ6 transcript levels rise in response to a jasmonate stimulus and a GFP:JAZ6 fusion protein localizes to the nucleus. Application of jasmonate methyl ester to Arabidopsis roots reduces the levels of a JAZ6:GUS fusion protein, presumably by stimulating	Identical to Protein TIFY 11B (TIFY11B) [Arabidopsis Thaliana] (GB:Q9C9E3); similar to JAZ5/TIFY11A (JASMONATE-ZIM-DOMAIN PROTEIN 5) [Arabidopsis thaliana] (TAIR:AT1G17380.1); similar to hypothetical protein [Vitis vinifera] (GB:CAN83805.1); contains Int	61.82	55	21	0	3	167	215	269	3e-14	73.6
MLN2.Contig_1248	GACTGTTGGAGCCTAAAGATGCGGATTTTGTGCGATGCATGCGAGAACGCAGCCGCTATCGTCTTCTGCGCCGCCGATGAAGCTGCCCTTTGCCGCCCCTGCGATGAAAAAGTACATATGTGCAATAAGCTAGCTAGTCGGCATGTACGTGTAGGTTTAGCCGAACCAAGCAATGCCCCTTGCTGCGATATTTGCGAAAATGCACCTGCCTTCTTTTACTGTGAGATAGACGGTAGTTCGCTTTGTCTGCAATGTGACATGGTAGTACATGTTGGAGGCAAGCGAACGCACGGGCGGTTTCTTTTGCTCAGACAGAGGATAGAGTTTCCAGGGGACAAGCCTAAACAAAACAATACGAGAGACAATATGCAAAACCAAAGAGTCTCTGCAAGTGCAAAC…	598	1	AT4G38960.1	zinc finger (B-box type) family protein		similar to zinc finger (B-box type) family protein [Arabidopsis thaliana] (TAIR:AT2G21320.1); similar to unnamed protein product [Vitis vinifera] (GB:CAO47249.1); contains InterPro domain Zinc finger, B-box; (InterPro:IPR000315); contains InterPro domain	72.73	22	3	1	489	545	158	179	7e-91	31.6
MLN2.Contig_1249	CTAATTGAAGTAGCCGTTGCTCTGGAGAAGGCAGCTCTTTCTGATGATTACTTTGTTAAGAGGAAGCTTTATCCAAATGTTGATTTCTACTCTGGTTTAATATACAGAGCAATGGGGTTTCCACCAGAGTTCTTTACCGTCTTGTTTGCTATTCCTCGCATGGCTGGATACTTGTCTCATTGGAAAGAGTCGTTGGATGATCCTGACACCAAGATCATGAGGCCACAACAGGTGTACACCGGAGTGTGGCTTAGGCATTACACACCAGTTAAAGAGAGGGATGAGCCAAAGGAGTCAGACAAGTTGAGTCAAGTCTCGACTTCTAATGCATCAAGAAGACGTTTGGCTGGATCTTCAGTTTAGGTCCATTATCATATACCTTACAGTTACAACACACTG…	575	1	AT2G42790.1	CSY3 (CITRATE SYNTHASE 3); citrate (SI)-synthase	Encodes a peroxisomal citrate synthase that is expressed throughout seedling and shoot development.	Identical to Citrate synthase 3, peroxisomal precursor (CSY3) [Arabidopsis Thaliana] (GB:Q9SJH7;GB:Q56YQ7); similar to CSY2 (CITRATE SYNTHASE 2), citrate (SI)-synthase [Arabidopsis thaliana] (TAIR:AT3G58750.1); similar to CSY1 (CITRATE SYNTHASE 1), citra	93.5	123	5	1	1	360	387	509	2e-61	231
MLN2.Contig_125	GGGCGTCTTCGGTTAACGAGAAAAAATCTGAAAATGACGAGCAGATTGTCACTCTTGCTGAACATCTTTCAACTGACTACTGCTACACCTTTGCTGTCAAAAAGCCTGCAGCGGTGCCTCCGGTGAGAGAGCTCCGKAAGCTGCTGAGGATCCAGGCCTTGCGTTGTCATGTCGTTTATAGTCAGAACGGCACTCGAATAAACGTGATMCCKGTGCTGGCTTCTCGTATACAAGCCCTAAGGTACTTGTTCGTTCGGTGGGGCATTGACATGGCGAAGATGGYGGTGTTCGTGGGAGAATCAGGTGACACAGATTRCGAAGGATTGCTCGGAGGACTTCACAAGAGCGTTGYTCTAGAGGGGGTATCGTGCAGCGCAAGCAACGCCTTGCACGCTAACA…	628	2	AT5G20280.1	ATSPS1F (SUCROSE PHOSPHATE SYNTHASE 1F); sucrose-phosphate synthase/ transferase, transferring glycosyl groups	Encodes a protein with putative sucrose-phosphate synthase activity. When the gene was expressed in transgenic tobacco plants, a clear trend for increased SPS activity was noted.	similar to ATSPS3F (sucrose phosphate synthase 3F), sucrose-phosphate synthase/ transferase, transferring glycosyl groups [Arabidopsis thaliana] (TAIR:AT1G04920.1); similar to ATSPS2F/SPS1 (SUCROSE PHOSPHATE SYNTHASE 1), sucrose-phosphate synthase [Arabid	91.25	160	14	1	3	482	877	1034	1e-73	272
MLN2.Contig_1250	GTTTCTAAGGTTACGTTCTGAAGAAATTGTCTCTAACGGACGCATGGTTCTCACCTTGATTGGTAGAAACACTCTTGACAGTGATCCATTGTATAGAGATTGTTGTCACTTTTGGACATTGCTATCCAAATCTCTCCGTGACCTAGTCTTCGAGGGCCACGTGAGTGAATCAAAACTGGATGAATTCAACATGCCGTTTTATGATCCAAACGAACAAGAACTAGAAGAAGTGATACGAAACGAAGGCTCTTTTGAAATCAATGACTTAGAGAAACATGTATTCGACCTTGGCCTTAGTAACAACAACAACGAAGAAGATGACTATGAGGCAGGATACAATGAAGCTAATTGTATAAGAGCGGTTACTGAACCAATGCTCGTTGCTCACTTTGGAGAAGA…	654	1	AT3G11480.1	BSMT1; S-adenosylmethionine-dependent methyltransferase	The gene encodes a SABATH methyltransferase that methylates both salicylic acid and benzoic acid. It is highly expressed in flowers, induced by biotic and abiotic stress and thought to be involved in direct defense mechanism.	similar to NAMT1, S-adenosylmethionine-dependent methyltransferase [Arabidopsis thaliana] (TAIR:AT5G04370.1); similar to methyl transferase [Arabidopsis lyrata subsp. lyrata] (GB:AAP57211.1); contains InterPro domain SAM dependent carboxyl methyltransfera	80.24	167	33	2	2	502	217	379	5e-72	267
MLN2.Contig_1251	GGCAGACAAGGGCTGGTCAGAGACGAGGTTCAAGGCCGTCGTCGTCGTCGGGGACACGAACGGGCACGTGGGATTGGGTGTGAAGTGCTCCAAGGAGGTTGCTACGGCGATTAGAGGAGGGATTATATTGGCGAAGCTGTCGGTGATTCCGGTGAGGAGAGGATACTGGGGGAACAAGATTGGGAAGCCGCATACGGTTCCTTGTAAGGTTACGGGGAAGTGTGGGTCCGTGACGGTGAGGATGGTGCCGGCTCCGAGAGGTGCGGGGATTGTGGCGGCTAGGGTTCCTAAGAAGGTGCTTCAGTTCGCTGGGATTGATGACGTGTTCACTTCTTCCAGGGGGTCTACTAAAACTCTTGGAAACTTCGTTAAGGCTACGTTTGATTGTCTACAGAAGAC…	620	1	AT1G58684.1	40S ribosomal protein S2, putative		Identical to 40S ribosomal protein S2-2 (RPS2B) [Arabidopsis Thaliana] (GB:Q93VB8;GB:Q8L861;GB:Q9SM06); similar to XW6, structural constituent of ribosome [Arabidopsis thaliana] (TAIR:AT1G58380.1); similar to 40S ribosomal protein S2, putative [Arabidopsi	88.76	169	17	1	23	523	115	283	2e-83	304
MLN2.Contig_1252	TAGAGAAACTCGGCGAGCCTGGTCAATCCCATGATGACTTTGCAGCTAGTCTTCCTGCTGATGAATGCCGATACGCCATTTTCGATTTTGATTTCGTCACTGCTGAGAATTGCCAGAAGAGCAAGATCTTCTTCGTTGCATGGTCTCCGGACACGGCTAGAGTGAGAAGCAAGATGATCTACGCGAGCTCTAAGGACAGGTTCAAGAGAGAGCTAGACGGGATTCAAGTAGAGCTTCAAGCAACCGACCCAACCGAGATGGATCTCGACGTTTTCAAAAGCCGAGCCAATTGAGGAACCGGTTGAATCGAACTTCTTTCATCTACTATTGCCGAGTGATATGCTTTTACTTAAGGTTTGCTGTGACGGCACCAACCAAAAAAACAGCTTCATTTTTATC…	519	1	AT3G46000.1	ADF2 (ACTIN DEPOLYMERIZING FACTOR 2); actin binding	Encodes depolymerizing factor 2.	Identical to Actin-depolymerizing factor 2 (ADF2) [Arabidopsis Thaliana] (GB:Q39251;GB:Q9LZT2); similar to ADF4 (ACTIN DEPOLYMERIZING FACTOR 4), actin binding [Arabidopsis thaliana] (TAIR:AT5G59890.1); similar to unknown [Populus trichocarpa] (GB:ABK9257	89.58	96	10	0	3	290	42	137	3e-46	181
MLN2.Contig_1253	GATCATCGTTTGGATTTAATTGAGTTTTGTTCTTTATATCGAAAAGCTTCTTCCTTTCCATCTCAGATGGTTCAGTCATCTTCAAGCTTATTTGGATTTATAAAGATGACTGTGGTTGCATGTTCTGGAATTGAAGCTTTGTCGGTGTTGAGATCGTCTTGGATTCATTTGAATCTGGTTTTCTCTCCAATCTTATAAAGCGATGGTCTTTCTCACTTTGGGCGCCTTCATTTTAGATCGAGTTGTCGTGGTGGCTCCAATCCGTGCTTCCTGTCTCCGGTGTGTTCCGGTGGAAGCACGATCAAGCTTCCCGGCGACGACTTTCCACGCGATGAAGTTGGATGACGTCTTGGCAAACACGTGTTCTCTTTAGGGTCTGAGTTCAACACGTGGTAGAGC…	534	1	AT2G04070.1	transporter		similar to ATDTX1, antiporter/ multidrug efflux pump/ multidrug transporter/ transporter [Arabidopsis thaliana] (TAIR:AT2G04040.1); similar to MATE efflux family protein [Arabidopsis thaliana] (TAIR:AT2G04080.1); similar to MATE efflux family protein [Ara	44.83	29	14	1	445	525	179	207	2	28.9
MLN2.Contig_1254	TGTCTCCGAGCTCTTGAACGGATCTTGGATAGTCATCGCTGGGGACTCTCAGGCGAGGTTCGTGGCGTTGTCGTTATTGGGCCTGGTGTTGGGCTCGGGGTCTGAAGCTATGGGCTCGGTTAGAGAGGAGCTTTTCAAGAGGCATAGTGATTACAGTATTATGGTTAAAGAGATTGGGATGAAGGTGGAGTTTGTCTGGGCTCCTTACGAGAAAGATCTTGATGATCTTGTCGTGTCGTATAAGAAAAAGAACAAGTATCCAGACGTTGTGATTATGGGGAGTGGGTTGTGGCATATGCTTCACGTCAACAACGCGTCAGATTTTGGATCTCAGCTTAAGGAGCTGAGGAGTCATGTTGAGTTGTTAGTCCCCGTGAGGACCAAGGGGGAAGAAGGAGG…	669	1	AT3G03210.1			similar to unnamed protein product [Vitis vinifera] (GB:CAO22195.1)	84.31	204	32	1	2	613	132	334	5e-91	317
MLN2.Contig_1255	AAGTGGCGGCTGCGCCTGGCTCAGGTGGAAGCAGTGAGAGCTAGCGAAAACGAGACGCTGAAGAAGTTGGAGACGACGCAAGAGGAGATCGAGAAGCTAAAGACTGCAACGGAGGAGGCACTGAAGAAAGCAGCTATGGCTGATGCTGCAAAGAAAGCGGTCGAAGGAGAGCTCAGGAGGTGGCGGGAAAGAGATCAGAAGAAAGCAGAGGAAGCAGCGTCGAGGATTCTTGCGGAGGCTGAGGCCAGGATGTCTGTTGAATCATCACCGCAGCATCTCTACTACAAAGACACGAAACAGAAACCTGTTCACAAGAAGAAGCTGGAGAAGACGAGAACTAGTGTGGTGTCAAAGAAAGTGTTGATGCCGAATCTAAGTGGAATCTTTAGTAGAAAGAAG…	589	1	AT5G55860.1			similar to unknown protein [Arabidopsis thaliana] (TAIR:AT1G12150.1); similar to unnamed protein product [Vitis vinifera] (GB:CAO45150.1); contains InterPro domain Protein of unknown function DUF827, plant (InterPro:IPR008545)	88.19	144	17	2	16	447	507	648	6e-39	157
MLN2.Contig_1256	GGTTCATCAAATGGCGGAATCAAAGACAAAGTTTGCAGAAATCAGGGAATGGATCGTCGACCACAAGCTCCGTACCGTTGGTTGTTTATGGCTGAGTGGTATCTCTGGTTCGATCGCCTACAACTGGTCTAAACCTGGCATGAAAACCAGTGTCCGTATCATCCACGCCAGGCTACACGCTCAGGCCCTGACGTTGGCCGCTCTAGCTGGAGCAGCCGCGGTGGAGTACTATGATCACAAAACTGGAGCCACCGATCGCTACCCCAAATTTCTCAAGCCTGATAACTTGAATAAAGACTAAACAATCTTTGGCTAATAATGCCTATTGTAGGCATATTATAGCTAGTGAGATTTTTTTTTTTAATGTTTATTGAATCCTTCTTTACTACTTTGAAATGG…	516	1	AT5G27760.1	hypoxia-responsive family protein		similar to hypoxia-responsive family protein [Arabidopsis thaliana] (TAIR:AT3G05550.1); similar to hypoxia-responsive family protein [Citrus sinensis] (GB:AAZ05072.1); contains InterPro domain Hypoxia induced protein conserved region (InterPro:IPR007667)	92.71	96	7	0	11	298	1	96	3e-36	147
MLN2.Contig_1257	CCGTCTTAATTTTCTCCCCAGCGAAAATGGCGTCGTTCGATGAAGCACCACCAGGAAACTCCAAGGCCGGTGAGAAGATCTTCAGAACCAAGTGCGCTCAGTGTCACACCGTCGACAAAGGCGCCGGTCACAAACAAGGACCGAACCTAAACGGGCTGTTTGGAAGGCAGTCTGGAACAACAGCCGGTTACTCTTACTCTGCGGCTAACAAGAACAAGGCTGTTGAATGGGAAGAGAAGACCTCGTACGATTACTTGCTCAACCCCAAGAAGTACATTCCTGGAACGAAGATGGTCTTCCCTGGGCTCAAGAAGCCACAAGATCGCGCTGATCTCATCGCCTACTTGAAGGAAGCTACTGCTTAGTGAAATCTATCAACCAATGGTGTTGTGGGAACAT…	540	1	AT1G22840.1	ATCYTC-A/CYTC-1 (CYTOCHROME C-1); electron carrier	Encodes cytochrome c. Contains two site II (TGGGCC/T) elements, which interact with a TCP-domain transcription factor, and a downstream internal telomeric repeat, and are required for expression of the Cytc-1 gene. Promoter directs preferential expressi	Identical to Probable cytochrome c At1g22840 [Arabidopsis Thaliana] (GB:O23138); similar to CYTC-2 (CYTOCHROME C-2), electron carrier [Arabidopsis thaliana] (TAIR:AT4G10040.1); similar to Cytochrome c (GB:P62772); contains InterPro domain Cytochrome c, cl	94.64	112	6	0	27	362	1	112	1e-59	225
MLN2.Contig_1258	GGGTCGCTGTCACAGTACGGTATCAAGCACATGAGGTCCTTTGCAAACATCTGCAACGCAGGGATCCAAATGAGGCAAATGGAAGAGGCAGCTTCACAGGCTTGTACATCAATCCCATCTGGTCCTTGGAGCTCTCTTCACCGTGGATTCAGTGCTTAAAACCCCTAATCCATCTTTGCATTTGTTTAATACCCAAATATTCCTATTTCGATTCCCCTGTATATCTCATTATCATTTCCCTCTTGATTGTGTAATTACAGATTATCTACTTGCTTTGTACAAATGCTTGTAGAAACTCAAGTTAATGTAAACAAAGGTTTGCTT	324	1	AT4G32940.1	GAMMA-VPE (Vacuolar processing enzyme gamma); cysteine-type endopeptidase	Encodes a vacuolar processing enzyme belonging to a novel group of cysteine proteinases that is expressed in vegetative organs and is upregulated in association with various types of cell death and under stressed conditions. They are essential in processi	Identical to Vacuolar-processing enzyme gamma-isozyme precursor [Arabidopsis Thaliana] (GB:Q39119;GB:Q93VM0;GB:Q9SB73); similar to ALPHA-VPE (ALPHA-VACUOLAR PROCESSING ENZYME), cysteine-type endopeptidase [Arabidopsis thaliana] (TAIR:AT2G25940.1); simila	90.38	52	5	0	1	156	443	494	5e-23	102
MLN2.Contig_1259	GGATAACTTCCCCATCGAGAAACCTCGCCAAATAAAAAACCGAAAAAGCGCGTGCGTCGGTGACTTGTAACTCTCAATCTCTTCTTCGAAAACATCATCAGAGCCGAGCCATGTCTTACGATTACCTCTTCAAGTACATAATCATCGGCGACACAGGTGTGGGGAAATCGTGCCTGCTTCTGCAGTTTACTGATAAGAGGTTCCAGCCAGTCCACGATCTCACCATTGGTGTCGAGTTCGGTGCTCGTATGGTCACCGTCGATGGTCGTCCTATCAAACTCCAAATTTGGGATACCGCTGGACAAGAGTCGTTTAGATCCATCACTAGGTCGTATTACAGAGGAGCAGCTGGAGCTTTACTTGTCTACGACATCACCAGGAGAGAGACGTTTAACCATC…	615	1	AT4G35860.1	ATGB2/ATRAB2C/ATRABB1B (GTP-BINDING 2); GTP binding	GTP-binding protein ATGB2	similar to AT-RAB2 (Arabidopsis Rab GTPase homolog B1c), GTP binding [Arabidopsis thaliana] (TAIR:AT4G17170.1); similar to unknown [Populus trichocarpa] (GB:ABK92828.1); contains InterPro domain Ras GTPase; (InterPro:IPR001806); contains InterPro domain R	98.21	168	3	0	111	614	1	168	4e-92	333
MLN2.Contig_126	GTTTCAAGTATCATTTCCATGGCTCTCTTCTGTCCATATGGTTCAGTTCTCTATCTATTTCAATTAGGGTGATTGGAGGCTTAGGGTTCTTTGAGGACAGTCCCGATGTCTCTATCTCTTGATATCTGACGATTGAGACTTGCCATTGGTGGGTCTAGCCTGTTTTGAGAGTCCTTGGACTTCTCCTGTTCTTCATCTCCGTCTGCAAGCTCCGGTTTGTCTCTTCAGACAGCTTTGATGTGTTAGCTTATTCTTTGGGTCGCGTGGTCGGATTGGGGAGCGTTATACCGACTGCGCTTGACCATCGTTCTTGTGCTCTATTTTCAAGTGAAGACAACTAGGCACAGTCAGAAAGCTACTTTCCGAGTGGCTTTGGGTTTGGTTTCAACGAAGTCCCTC…	614	2	AT4G24500.1	hydroxyproline-rich glycoprotein family protein		similar to unnamed protein product [Vitis vinifera] (GB:CAO61596.1)	33.33	45	30	0	315	449	68	112	9.6	26.9
MLN2.Contig_1260	ATCGAGGAGAGACAAAATCGCCGAGCTTCTCTTCTCCTGCAGAGTCAATCGCTGCACCGGTTGCGACCACGTGGAGCTATCTGTCCCCGGAGGAGACGGCGAGGAGGAGGCTAATAATATTGGAGATGCGGCGGTTGATGGTGGCGAAGAAGCTGGTGGGAGTAAAGAGAGCAAAGCTAATAGCAGCAGAGGAGATAACAATCATACTTATGATGACGAAGCTGAGGCTTTGAGCGATGCGATTGAGGAGTTTTCTATGGTGTCTAAGGAAGTTTGTAGGATTAAAGAGATCCTGCTCAACAAAGACGTTGAGTCACACTCTGTGATACTTGAATCCCTAAGGAAGCTGAAGCTGATGTCTTTGAATGTGGATATCCTCAAGAGTACTGAGATCGGAAA…	563	1	AT5G05140.1	transcription elongation factor-related		similar to DNA binding / protein binding / transcription regulator [Arabidopsis thaliana] (TAIR:AT3G10820.1); similar to unnamed protein product [Vitis vinifera] (GB:CAO18227.1); contains InterPro domain Transcription elongation factor, TFIIS/elongin A/CR	77.44	195	36	2	2	562	43	237	4e-68	253
MLN2.Contig_1261	GCTTCCGAAGGAGAGCTGCTACTCTGCAACCATGTCGAAGCGAGGAAGAGGAGGAACCTCTGGTAACAAGTTCAGGATGTCACTGGGTCTTCCAGTGGCAGCCACCGTGAACTGTGCTGACAACACCGGAGCCAAGAACCTTTACATCATCTCCGTGAAGGGTATCAAGGGTCGTCTCAACCGTCTGCCATCCGCCTGTGTTGGTGACATGGTTATGGCTACCGTCAAGAAGGGTAAACCTGATCTCCGTAAGAAGGTTCTGCCTGCTGTCATTGTTAGGCAGAGGAAGCCTTGGCGCCGAAAGGATGGTGTCTTCATGTACTTCGAGGATAATGCTGGTGTCATTGTCAATCCCAAGGGTGAAATGAAGGGATCTGCTATCACTGGACCAATCGGAAA…	591	1	AT3G04400.1	EMB2171 (EMBRYO DEFECTIVE 2171); structural constituent of ribosome		Identical to 60S ribosomal protein L23 (RPL23C) [Arabidopsis Thaliana] (GB:P49690;GB:Q8L8P0;GB:Q9SDB5); similar to 60S ribosomal protein L23 (RPL23A) [Arabidopsis thaliana] (TAIR:AT1G04480.1); similar to 60S ribosomal protein L23 (RPL23B) [Arabidopsis tha	100	140	0	0	32	451	1	140	3e-77	284
MLN2.Contig_1262	GGGAGACATCGGAGGAACCCTAGATTAAATGAGAAGGAGAGAGTGAGGAGAGGAGAGAGAGATTGAGTAAACTCATGGAGGAGGAGAAGAAGAAAGAGGGATCGTATAGGTACTGGGTGAGAGAAGCCACAGCGGACGCAGCTCCTCCTCCTCAGCCACAGAAGCTCACCAACAACGACGTCGCTTCCAATGCTCCTGCCCTCGGCTCCCTATGGAATCAGGCTGGCACTTGGGAGGAAAAAAATATCACGAAATGGGCCACTGATCGATTAAAGGAGCTGCTGGGATCAGTGGGTTCATTGCAATTCTCTTCTGGAAAAGCTGAGATTATAGATGTTAACCGATGTGTTGGAGATGCTTTCTTGGTCACAGTTCGGAACAAGAAAAGAGTTGGCTATA…	686	1	AT5G58110.1	ATPase activator/ chaperone activator/ chaperone binding		similar to hypothetical protein OsI_005644 [Oryza sativa (indica cultivar-group)] (GB:EAY84411.1); similar to Os06g0703800 [Oryza sativa (japonica cultivar-group)] (GB:NP_001058502.1); similar to hypothetical protein OsJ_005168 [Oryza sativa (japonica cul	89.07	183	18	2	105	647	14	196	4e-82	300
MLN2.Contig_1263	GAGACGCAGTGTGTGTGATTCGTGGAGGAGAGTGACGATGGAGAATAATGACAAGAGATGGTCCCTCGCCGGAAAAACCGCTCTAGTAACCGGTGGTACTCGCGGAATCGGGCGAGCGGTCGTGGAGGAGCTAGCGAGATTCGGGGCAACGGTTCATACATGTTCAAGGAGCCAGGAGGAGCTCAAATCATGCTTGGATGATTGGAAGTCCAATGGTTTAGTGATAACCGGTTCGGTTTGCGATGCTTCGGTTAGGGATCAGAGGGAGAATTTGATCCAGGAGGTTTCGTCCGTCTTTAGCGGCAAGATTAACATCCTTGTAAACAATGTTGGAACTAATTTAAGGAAGCCAACGGTCGAGTACACGAGTGAGGATTATGCTAAAATCATGTCGACCAA…	590	1	AT5G06060.1	tropinone reductase, putative / tropine dehydrogenase, putative		similar to tropinone reductase, putative / tropine dehydrogenase, putative [Arabidopsis thaliana] (TAIR:AT2G29290.1); similar to tropinone reductase, putative / tropine dehydrogenase, putative [Arabidopsis thaliana] (TAIR:AT2G29260.1); similar to tropinon	87.78	180	22	0	50	589	4	183	9e-80	292
MLN2.Contig_1264	TCAGAGATGACGCAGATGCTTTCCATACTCCGCCGCAACCTCCAAAACCTTCGTAAGAGCCCACGCGTAGCTGACGAGACTGAGATGGCTTCGACGACACAAGAAGCAAGAGTAGTAGCTCATAACGAAAGACGAGACGGGGCTAACGCCGTTATGATGCGATTCCCTTTCTCGATCATTTCGTGCTTTGCCGTGCCACGTGTCAGCGGGACAGATGGACTATGGATGTCTGGAGATTATGCCAGCGTCTCAGAGGTTAACCATCTCATGGTTAGTGATGGCATGAGATACGCCATTTTAATGTAATAACCCAAGTCCAAACATGTTCGTAGTGTTTCGTTTTTTTTCTTATGTTAACGATACAATTACTTAGCTTCTCGATCCTACATGTGTACAGTA…	496	1	AT5G35732.1			similar to unknown protein [Arabidopsis thaliana] (TAIR:AT2G04795.1); similar to unnamed protein product [Vitis vinifera] (GB:CAO24128.1)	80	100	19	1	7	303	1	100	2e-39	157
MLN2.Contig_1265	GCACACCAAGATGTTCAGTGCGCTGAGAGGTGAGTGGAACATGATGATGAAACACCGTGACATCATCACAGCTGTTCGTCGTCACTACAACAACGCTTATCAGACGGCGAAAAGCAGAACGCCATCAATGTGTTCTTGGGGAAATCCGGGCCTCAACTGGGGAGGCAAGCCCCGTGGGAGTTGGGTTCTGACCAACGCAACACTAGAAGAACTAGTTCTAACCTAGACATCGAAACCCTGAGGCCAAAAATTTCAAGATCCTTATCGGATAACCTTCTCTTATTGGGTGAACTGAATCTGGAGGAGCCGATACTCGAAAATCCTGAGCCTTCACGTGAAGGGTTAAACGGTGTTATATGGGAAACAACTTCAGAATCTGGATTCATTGAAGCTGAACCA…	612	1	AT1G17340.1	phosphoinositide phosphatase family protein		similar to phosphoinositide phosphatase family protein [Arabidopsis thaliana] (TAIR:AT3G14205.1); similar to unnamed protein product [Vitis vinifera] (GB:CAO65182.1); contains InterPro domain Synaptojanin, N-terminal (InterPro:IPR002013)	70.59	34	10	0	2	103	537	570	4e-47	57.4
MLN2.Contig_1266	ACTGATGTATTCAACGAGTTCACACCTTGGCCGACAGGCCCGGGTAATCTTTAAAATTTCATCGTGATGGAGATCGGTGTTTACACTGGCTACTCTCTCCTCGCCACCGCTCTTGCTCTCCCCGAAGACGGCAAAATTCTGGCTATGGATGTTAACAGAGAGAATTACGAATTGGGTTTGCCGATCATCGAGAAAGCCGGCGTTGCTCACAAGATCGATTTCAGGGAAGGCCCTGCTCTACCTGTTCTTGATCAACTTGTTGCTGACGAGAAGAACCATGGAACATATGACTTTATATTCGTTGATGCTGACAAGGACAACTATATCAACTACCACAAGCGTTTGATTGATCTTGTGAAAGTTGGAGGAGTGATTGGCTACGACAACACTCTGTGGAAC…	593	1	AT4G34050.1	caffeoyl-CoA 3-O-methyltransferase, putative		Identical to Probable caffeoyl-CoA O-methyltransferase At4g34050 [Arabidopsis Thaliana] (GB:O49499;GB:Q8L989); similar to caffeoyl-CoA 3-O-methyltransferase, putative [Arabidopsis thaliana] (TAIR:AT4G26220.1); similar to caffeoyl-CoA 3-O-methyltransferas	98.17	164	3	0	67	558	96	259	6e-92	333
MLN2.Contig_1267	GCCCAGCTCTTGGAACTATTAGAGGCAAATGCATCACACAATTACTACTACTTGGTGCTATCAACAGTATCCAGAAAAAATACTGGAGTAATTTGAAAACAGCACAGAAGATTGCGATCATGGACATCTTATTCTCTTTCATAGAATTCGCCGCTTCCTACAATTCATATTCTAACCTCAGAACACGAATGATTCACATTTCCGCGGAAAGGCCACCTCTAAACCTTCTCCGACAAGAGCTGGAAGGAACCAACATATATATGGATGTCTTACATAAGACTACAACTGGGCTTGGGGATGCTGCATCCGACACGGAAGATAAACTCGAAGGTGCAGCTGAAGGAAAGCTGGTGTCGTTCTGTGAACAGGTGCTGAAAGAAACATCTGATCTCCAGTCCT…	605	1	AT3G43300.1	ATMIN7 (ARABIDOPSIS THALIANA HOPM INTERACTOR 7); guanyl-nucleotide exchange factor/ protein binding	AtMIN7 is an immunity associated Arabidopsis protein targeted by HopM1, a conserved Pseudomonas syringae virulence protein. AtMIN7 encodes one of the eight members of the Arabidopsis adenosine diphosphate (ADP) ribosylation factor (ARF) guanine nucleotid	similar to guanine nucleotide exchange family protein [Arabidopsis thaliana] (TAIR:AT3G60860.1); similar to EDA10 (embryo sac development arrest 10), guanyl-nucleotide exchange factor [Arabidopsis thaliana] (TAIR:AT1G01960.1); similar to guanine nucleotid	89.05	201	22	0	3	605	1551	1751	5e-99	356
MLN2.Contig_1268	ATCTGATGATATCTGAGAATAGAACCGACTCTATGCGATTTGGAGGAAGTGATAGTAGTAGAGGCTTGTGTTCTGCTGGTCAAAGACATGGGTTTCCTGACAACCATGCTCCTGTTTGGAGACCGCACCGGGGCTTACCCGAACGCGCAGTCACCGTTCTAAGGGCTTGGCTCTTCGATCACTTTTTGCATCCTTATCCAACTGATACAGACAAACTCATGTTGGCTAAACAGACAGGTCTCTCCAGAAATCAGGTATCGAATTGGTTCATAAACGCACGAGTTAGGGTATGGAAGCCGATGGTGGAAGAGATTCATATGCTAGAGACTCGACAATCTCAGAGATCTTCTTCTTCTTCTTGGAGAGACGAACGTAACACCACCACCGTCTTCCCCGATA…	624	1	AT5G02030.1	LSN (LARSON); DNA binding / transcription factor	Mutant has additional lateral organs and phyllotaxy defect. Encodes a homeodomain transcription factor. Has sequence similarity to the Arabidopsis ovule development regulator Bell1. Binds directly to the AGAMOUS cis-regulatory element.	Identical to BEL1-like homeodomain protein 9 (BLH9) [Arabidopsis Thaliana] (GB:Q9LZM8;GB:Q8H147;GB:Q8LGJ2); similar to BLH8 (BEL1-LIKE HOMEODOMAIN 8), DNA binding / transcription factor [Arabidopsis thaliana] (TAIR:AT2G27990.1); similar to unnamed protei	84.06	207	32	3	6	623	312	513	6e-85	310
MLN2.Contig_1269	GATTGGCTCCCTTTCTCCCCTGGCTCCTCCTTCTGGGTCCCTCCGCACCAGAACACCGCCGCCAAGATCGCTAATTTGGTCGACCAGGTGACGCATCCGTTGACGGAGGAGGAGGTTCTCTCTCTGTCTTCTCCTTCTGGCTGGCCTTGCTCCTCTTTCTTCACTCCTCCTCCAGATGATGATTCTTCATCTAACCAAGAGGTGGAAAGGAGCACGGAGTTGAACGTTCCGGGGAATGAGATGCTGGAAGTCAAGCTAGCGCAGTTTCCAGATCCAATCTACTTGTTGAAACACGGAGACGATGATGAGTGATTTTTCTTTTCCAGCTCACGTGGAAGGCCAGTCCTGTTGCATGGTTTGCGTTGACAGGCTTTGGAAAAAAAAAACGGATGATTCTCG…	531	1	AT2G19180.1			similar to unknown protein [Arabidopsis thaliana] (TAIR:AT1G78890.1); similar to unknown [Populus trichocarpa] (GB:ABK96198.1)	79.38	97	20	1	1	291	78	173	5e-31	130
MLN2.Contig_127	GCCCGCTCACACCATCAAGACAAGCCGTCTCTGCGTCTGTCCGTTTCTACGCAGGAGAATGGGAAGAGCTTCCTACCGTTTTATCCATCATACGAACCGATGTCTTCGAACCAGCTGCGATGAGCTTGAGTTTCTCAGAGGAAGATTTCAACGACGGATGCAGCAGCCAAGACGGGAGCATTACAGGACAACAACRGCAAGACTTCTTCTCGAGGCGGTCGAGGAAGCTCTCGGGGAGCAGAGCGTGGGAGAGAGCTAACGAGAGTGATCAAGGAGGAGAGTGTGGGTATGATGTTATACTAATGACTGAGATTCCATACTCGGTTACATCTCTCAAGAAACTATATTCTCTCATCAAGAAGTGCCTGAGACCGCCTTACGGTGTGGTGTATTTGGCGG…	605	2	AT2G43320.2			similar to unknown protein [Arabidopsis thaliana] (TAIR:AT4G14000.1); similar to unnamed protein product [Vitis vinifera] (GB:CAO64780.1); contains domain SSF53335 (SSF53335); contains domain PTHR21095 (PTHR21095)	87.01	177	21	2	3	527	176	350	6e-84	306
MLN2.Contig_1270	CTTCAAATCACATCCACTTCTCCGATTCTCTTCACTAAAGTGACTCCCGCAAACCAAATCCAATTCAACCAGAGAACAACGTCAACATGCACATCCAACAAACTCCGTCTCCTCCGCCGTTCCGCTGCCGCTGGTACCGTCGTGACGGATCAGACAGAAGGAGGAGAAGAGGTTCTGATAAACCCCACGCCTGAAGAGGAGAAACGTGAAGAGGTGGTGGATTACGATTGGACAGAGGAGCGGTACCCTCTGTACCTCACCAGAGACGTTCCCGACGATTCGCCGCTTGGTCTCACCGTCTTCGATCGCCAAATCGTGTTGTACAGAGACGGCGAGGGTACGCTTCGCTGTTACGAAGATCGGTGTCCACATCGGTGAGCGAGAACCACTCGTTTTTTA…	542	1	AT2G24820.1	TIC55 (TRANSLOCON AT THE INNER ENVELOPE MEMBRANE OF CHLOROPLASTS 55); oxidoreductase		similar to ACD1 (ACCELERATED CELL DEATH 1) [Arabidopsis thaliana] (TAIR:AT3G44880.1); similar to hypothetical protein OsI_009063 [Oryza sativa (indica cultivar-group)] (GB:EAY87830.1); similar to Rieske iron-sulfur protein Tic55 [Pisum sativum] (GB:CAA041	71.88	128	36	1	1	384	10	135	6e-48	186
MLN2.Contig_1271	GGGAGAGTACGATGAGTCAGGTCCATCCATTGTTCACAGGAAGTGCTTCTAAGGGCTCTGCTCCCTTCTTCGTGGTGTGGTGAGTCTGTTTACAAGTCTCTTTCCCTAGCTGATATGGGAATTGGAACTATATGTTGTTATGTGGTTCTTTGGAACCTTCTGGATGTGTCAAGAGTCTCTGTGTACTTTAGTTCTATCTGTGTCTTTTATTTCTCTTTAGGATTCTTGTGATGCTGTTTTTTGTCCTTAAGCAAAAAATATTATATTATGTTTTGGCG	278	1	AT5G59370.2	ACT4 (ACTIN 4)	Encodes one of eight Arabidopsis actins. ACT4 belongs to the reproductive actin subclass which is predominantly expressed in developing and reproductive tissues, such as pollen, pollen tubes, ovules, and developing seeds. Expression of the ACT4/GUS fusi	Identical to Actin-4 (ACT4) [Arabidopsis Thaliana] (GB:P53494); similar to ACT3 (ACTIN 3), structural constituent of cytoskeleton [Arabidopsis thaliana] (TAIR:AT3G53750.1); similar to ACT12 (ACTIN-12), structural constituent of cytoskeleton [Arabidopsis t	100	15	0	0	5	49	363	377	0.002	37.4
MLN2.Contig_1272	ATCGAAGAGAATCTCAAGAAAGCGGTTAAAGCCGCGGTGAGCCAGGTGGCGAAACGGGTGTTAACGGTCGGTGTTAACGGCGAGCTGCATCCGTCTAGGTTCACGGAGCGGGATGTTCTCCAAGTGGTTGATAGAGAGTACGTGTCCTCCTACGCGGACGATCCTTGCAGCTTTGCTTACCCGTTGATGCAGAGGCTTAGGCACGTTCTTGTGGACCACGCTTTGGAGGATCCGGAGCGCGAGGCTAATGCTGCCACGTCGGTTTTTCAGAAGATAAGAGCGTTTGAGACGGAGCTGAAGGTGGTTTTACCTAAGGAGGTGGAGCGTGTTAGGAGTGAGTATGAGGAAGGGTGTTCGGTTATGGGTAACCGGATTAAGGAATGTCGGTCTTATCCGTTG…	533	1	AT3G10340.1	phenylalanine ammonia-lyase, putative		Identical to Phenylalanine ammonia-lyase 4 (PAL4) [Arabidopsis Thaliana] (GB:Q9SS45;GB:Q53ZM8); similar to PAL2 (phenylalanine ammonia-lyase 2), phenylalanine ammonia-lyase [Arabidopsis thaliana] (TAIR:AT3G53260.1); similar to PAL3 (PHENYL ALANINE AMMONI	84.18	177	28	0	1	531	519	695	8e-69	256
MLN2.Contig_1273	GAAACGGAATTCACCACAAATCCCAAAAATACAATAATTCAGCTACAATATTTTAGTTTATTCAGCTACAATATTTTTTAGTTTTGAGTTTTTGACACGAATTCGACATATATACGAAAACTAATTATTATTTTCTGACATCTTGGTGTATATATAAGAGAACCATAACTCTCTAACCACAAAGACAAAGAAAAATGATGAAACTCTTCTTGGTGGTGGCGATATGTGTTGCCCTTTTCTTGAGCCTCACAGATTTTTCCGGCAAGAGTCCAAAACATGGGGAGTCAATGCTGACTGTTCATTTCCCTGAGTTCCGTCTGATTCCGACCACTGGAGCTTCAGGACCAGAGAGTTTTGTCTTTGATATCTCCGGTGAAGGTCCTTACACAGGTTTATCTG…	523	1	AT2G41290.1	strictosidine synthase family protein		similar to strictosidine synthase family protein [Arabidopsis thaliana] (TAIR:AT3G57030.1); similar to unnamed protein product [Vitis vinifera] (GB:CAO63059.1); contains InterPro domain Strictosidine synthase; (InterPro:IPR004141); contains InterPro domai	80.91	110	20	1	195	521	1	110	2e-47	184
MLN2.Contig_1274	GGAGTTTCACTTTCCTCGTCTCTTCTGTTCTCTCTCACGGTGATTGAAAGGGGGATTTTGTCTCAACGGCGCATCTCCTCTCCGACGGTTCTCCTCCCGACGGATCTCCTCCCGAGACATCTCCTCCCGACTCTGAATCTCTCGACGGTTCTCCCGACGGATCTGTTGACGGTTCTGTCGACGGTTCTCTTCTCTCATCAACATCGTATTCCGTGATTCGAAGGTGAAAGGGTGAGGTGAGGTTCAACTACAATAACCCGGTTTCTATTAGTAAACAGCTCTAAGAGAAACAACCATTTCGTCCACAGCTAAAGAAAACGGTGTTGTAGTGGAAATACACACAGTTTCGATGGTGGACTTAGGAAAGGTTTTCAAACCGAGATCGAGCTAAGCGAAGAC…	585	1	no significant hit
MLN2.Contig_1275	ATTTCATGATATCCTTGGACAATTTCACCAGTGGACGTCTGCACACTCTGATAACTTCAGCTTTCAGTCATATTGATATTGGACATATCGTCTCAAACATGATTGGACTCTATTTCTTTGGAACCAGTATCGCAAGAAACTTTGGCCCTCAGTTCCTTCTGAAGCTGTACCTTGCTGGAGCGCTTGGCGGATCTGTGTTCTACTTGATTCACCATGCTTATCTAGCGGCGTCATCTCCCAAGGGCCAAGGAGCTTTCGTGAGGGATCCATCCAGAACCCCAGGACTGGGTGCGAGTGGAGCTGTGAATGCCATCATACTGCTCGATATCTTCCTCAACCCAACAGCTACTCTTTACTTTGAATTTTTCATTCCAGTTCCCGCAATGCTGCTTGGAATCT…	605	1	AT1G18600.1	rhomboid family protein		similar to rhomboid family protein [Arabidopsis thaliana] (TAIR:AT1G74130.1); similar to unnamed protein product [Vitis vinifera] (GB:CAO62451.1); contains InterPro domain Peptidase S54, rhomboid; (InterPro:IPR002610)	94.74	152	8	0	3	458	162	313	2e-70	261
MLN2.Contig_1276	ATCTCCAATCCCATTCAGCTTCTCGGTCAAATCGGAGGCCTAGCCACAACTCTACTCGCTATCCTTGGAATCTCTCTCGCCACAATCACCACAAACATAGCTGCAAACGTGGTCGCACCAGCAAACGCCCTGGTGAACCTAAACCCTAAGGTTTTCACATTCGGAAGAGGAGCCTTGTTGACCGCGGTTCTTGGAATCGTGTGCCAGCCTTGGAGATTGCTCAAGTCGAGTGAGAGCTTTGTCTACACATGGCTCATCGGTTACTCTGCGCTTCTTGGTCCTATTGGTGGTATAGTTCTTGCTGATTATTATCTGATCAAGAAGATGAAACTGAACATTGGAGATTTATACTCTTCGAGTGCCTCCGGAGAATATTATTATTCCAAGGGTTATAATGCG…	572	1	AT5G03555.1	permease, cytosine/purines, uracil, thiamine, allantoin family protein		similar to unnamed protein product [Vitis vinifera] (GB:CAO62981.1); similar to hypothetical protein [Vitis vinifera] (GB:CAN65774.1); contains InterPro domain Permease for cytosine/purines, uracil, thiamine, allantoin; (InterPro:IPR001248)	89.47	190	20	0	1	570	395	584	5e-53	203
MLN2.Contig_1277	GTATGAAGTTATGTTTGGCTTGTTGGGACTGTAACTTGGATGAGTAGGTACTAAAGTGAAGTGGTCGACTTAGAATTAGATTGAACAAAAAAAAGGGGATTCAAGAACCAGAGTTAATTTTAACATTAATTTCGTTTTTCTTTTCAGACTGGAGGGAGTTAGTAAACATGTGACTGTATGTAAAGAATATGTTGAGTCCATTTTCTACCAAAATCCATTGGTAGTGGTGTTTGTTAGCTTTACCAAATGTAATTTGTACC	260	1	AT3G05370.1	disease resistance family protein		similar to disease resistance family protein / LRR family protein [Arabidopsis thaliana] (TAIR:AT1G71390.1); similar to disease resistance family protein / LRR family protein [Arabidopsis thaliana] (TAIR:AT1G71400.1); similar to disease resistance family	52.38	21	10	0	99	161	599	619	2.2	27.3
MLN2.Contig_1278	GTCAAGAAAAATTTCCGGGTTTCATCAACACCTCTTCGGATGGTGGTGCCGGGGCCAGGAGAGGCCGGTTCAAAGGAACGGAGTTCGGTGACTCTTATGGGTTCCATAAGGTCTTGCAAGGTCAAGAAACAGTTCCCGCCTACTCAATGACCGCTCATCAGCAGCACGGGTTGAGCCAGGGGAACTTTAGTAGCCGTTTCCTACCGCCATCTTTAGTCCACGTCTCATCATCACCGTCTTCCGTCTTGATAACCAACTCGAACCGTCCCAATGGGCGTCTGGAAGAACACCAGGGAGGTTCTGGCAGCAGGTGCAGGCTGTTTGGTTTCCCACTGAGGGATGAGTCCACTGCGATGGTTGTGCCTTGTGTTGAAGGGCAAAAAGGTGTTTCTGGTGTTC…	596	1	AT2G33860.1	ETT (ETTIN); transcription factor	ettin (ett) mutations have pleiotropic effects on Arabidopsis flower development, causing increases in perianth organ number, decreases in stamen number and anther formation, and apical-basal patterning defects in the gynoecium. The ETTIN gene encodes a p	Identical to Auxin response factor 3 (ARF3) [Arabidopsis Thaliana] (GB:O23661;GB:O23670;GB:O81087); similar to ARF4 (AUXIN RESPONSE FACTOR 4), transcription factor [Arabidopsis thaliana] (TAIR:AT5G60450.1); similar to unnamed protein product [Vitis vinif	74.4	168	30	6	3	467	442	608	2e-47	185
MLN2.Contig_1279	GGACGTTTGATCTCTCTGTCCTTGGTGCGTTTCTCGTTCATGTTTCTGAAGCCTTCTTTGGCGCAGACGAATTGTCGCTGGATGATGGCGCCGTCGCGGCGGGAGCGGCGGGAGGAGCTGACGCGGGTGCTGAAGCCGATGCGGCGGGCGTAGGAGTTGTAGAAGGCTTTGGCGGATTCCTCGGATTCGAACTCGAGGCCTTCGTATGGCTCGAGGTCGCCGTCGGGGAAGTAGGTGGCGGCGTCGGAGGAGTTGGTGGTGTCGTCGAGCATGTCGATCGCGTCGTTGGGCTCGATGTCGATGCCGTCGTCGTCTACGTCGAAGTCGAGCACTTCTTCGTTGTCCATTGCGAGATCGTTCGTTAGAGAGCAGGAGAAGAAGAAACGAGCTGGGATCGAT…	583	1	no significant hit
MLN2.Contig_128	GTCTCTATTCCTCTTCCTTCCCGAGAAACTGTAGCAAAACGATAATCCAAACGGGATAAACTTAATCAGTCTTGTTTGCTCAGATTCTTAGAGATCGTGTGATTGAAAGACCCATGACTCTGTTCCCGATTCTAACCGCCTCGTTTCTCTTCCTCTTCTGCGTTCCGTTCACCACCGCATCTGCAGACGACGATTTGCCGACGGCGTACACTCTCCTCCAAAGCTACAACTTCCCCGTCGGGATTCTCCCCAAAGGAGTCTTGTCCTACGATCTGGACGAATCCACGGGGAAGTTCCACGCGTATTTCGACAAGTCGTGCAGCTTCGCACTCCAAGGCTCTTACCAATTGGATTACAAATCGACCATCTCCGGCGTCATATCGGAGAACAAGATCACGA…	799	3	AT1G02816.1			similar to unknown protein [Arabidopsis thaliana] (TAIR:AT4G02370.1); similar to unnamed protein product [Vitis vinifera] (GB:CAO40037.1); contains InterPro domain Protein of unknown function DUF538 (InterPro:IPR007493)	82.74	168	27	3	114	611	1	166	1e-74	276
MLN2.Contig_1280	GTTGGACGCTCTAACAGAAGATCCCTCAATGGTGGGGATTGAAGCATGGAGAACATCTAAAGACACCACAGGCTTTACACCAGAAGACTACGCTCGTTTACGCGGTCACTTCTCATACATCCACTTGATCCAACGCAAGATCAATAAAAAGTCAGCAACTGAAGATCATGTTGTGGTCAATATCCCTGCGTCCTCTATCTCAGACAGAGAGCAGAAAGAAACCAAATCAGGTTCTTCAGCGTTGGAGATCACACATGGAAACAACAAGCTTCAGTGCAAGCTCTGTGACCATAAGCTGGTGTATGGGACAGCACGCCGGTCTGTAGCATACAGACCAGCTATGCTGTCAATGGTGGCGATTGCTGCGGTTTGCGTCTGTGTGGCACTTCTCTTCAAGAG…	577	1	AT2G47070.1	SPL1 (SQUAMOSA PROMOTER BINDING PROTEIN-LIKE 1); DNA binding / transcription factor	member of SPL gene family, encodes DNA binding proteins and putative transcription factors. All have the SBP-box, which encodes the SBP-domain, required for and sufficient for interaction with DNA.	Identical to Squamosa promoter-binding-like protein 1 (SPL1) [Arabidopsis Thaliana] (GB:Q9SMX9;GB:O80717;GB:O80718;GB:O82651;GB:Q0WLD6); similar to SPL12 (SQUAMOSA PROMOTER-BINDING PROTEIN-LIKE 12), transcription factor [Arabidopsis thaliana] (TAIR:AT3G60	86.45	155	19	3	2	460	731	880	8e-64	239
MLN2.Contig_1281	GGCGAAACTCAGGGATTTGGCCGAAGAGAGAGCAATGGCGAAGAAAAAAGAGCTCTTATCCAAAGCCCCGTGGAGAGGCGACGACGATGACTCGGACAAGTTCAGCGGCGCAAAGCTCAAGGTCACCAAGGAATCTGACGGTATGTCGAGGATGCACGTCCCTAGCCGTGGAGCCAATAAGGTTAAGGGTAGTCTCTCCGATGACGAGGATTCCCTCGAGATCGATCCTCAGCTTCGCTACAGCTTCAATCGAAACTATCAGTTCCTGCAAAGAGTGTTCTCTATAGACACTGTGGTGAAGCCTCTTCCTCCTGCCGTGGCTTACAATGTCTCTCGCAACTTGGGCTTCTTCTTCCGCATTTTCACTCAGTTCTTTATCCTGAAGGCATTGCAAATGCA…	542	1	AT1G33810.1			similar to unknown [Populus trichocarpa] (GB:ABK94119.1)	95.65	23	1	0	379	447	116	138	1e-45	47
MLN2.Contig_1282	TGTTGAAGTGGACTACCCATGTCCGTTTTGCTCCGATGATTATGATTTAGTCGAGCTGTGTCACCATATCGACGAGGAGCATCAGCTTGAAGCTACCCATGGGGTATGCCCGGTTTGTAGCAAAAGAGTGAAGATGCACATGGTGGATCATATAACCACATACCATAGAGATGTCTTAAAGAGTGAGCAGAAGCAGACATCTTACATGGACGATCCATACTCATCAGATAAATATCTTCAATCTTTCCACGATGACATGCCGCCATCTATCAATCATCATACTTCTAAAGCTGTTGTTGCGGACCAGTTCTTATCTTTCCTCAACAGTCCTCCATTGCCAAAGCCAACCAAGACTGTGCAGGTTGATTCAAGTGTAGAAGACAAGGCTTTGATTGAGGA…	574	1	AT1G02750.1	zinc ion binding		Identical to Protein DEHYDRATION-INDUCED 19 homolog 2 (DI19-2) [Arabidopsis Thaliana] (GB:Q8GWK1); similar to drought-responsive family protein [Arabidopsis thaliana] (TAIR:AT4G02200.1); similar to fiber protein Fb2 [Gossypium barbadense] (GB:AAN77145.1)	69.41	170	51	1	2	508	43	212	4e-66	247
MLN2.Contig_1283	GGAGCACGGAAGAGAGAGATGGGAAAAGAGATGGAGTCGCCGAAGGAGCAGAGCCCGTACACCGTTGAGCAGCTCGTCGCCGTCAATCCCTTCAACCCCGAAATCTTACCCGATCTCGAAAACTACGTCAACGAGCAGGTTACATCGCAAACGTATAGCCTGGATGCGAATCTATGCTTGCTTCGTCTCTATCAGTTTGAGCCTGAGCGCATGAACACTCACATCGTGGCTCGAATCTTGCTCAAGGCTCTTATGGCTATGCCAGCTCCAGACTTCAGCCTTCGCCTCTTCTTGATTCCTGAAAGAGTGCAAATGGAGGAGCAGTTCAAGACGCTTATTGTTCTCTCACACTACCTTGAGACTGGGAGGTTCCAACAGTTCTGGGATGAAGCTGCCAAG…	619	1	AT4G33250.1	EIF3K (eukaryotic translation initiation factor 3K)	Encodes initiation factor 3k (EIF3k).	Identical to Eukaryotic translation initiation factor 3 subunit K (TIF3K1) [Arabidopsis Thaliana] (GB:Q9SZA3); similar to unknown [Populus trichocarpa] (GB:ABK95900.1); contains InterPro domain Armadillo-type fold; (InterPro:IPR016024); contains InterPro	89.5	200	21	1	19	618	1	198	2e-97	351
MLN2.Contig_1284	GATAGGAGTCATTTTGACGCGAAAACGCACTTCGAAAAAGAAAAAAAAAACTGTCGGTATGGTTTTGTCGCATCATCTTCATCCTCGAGTCTCGATCGCCGCATGGCCAGCTTACAATCACCGCCGGAAAAGCCTCCAGGATGTGCTTTTGAGCATGAGATTTGGATTAACGCGAGATCTCTCTCTGAAGCGGTCCTTGGGCAACTACTATTCCGTATCTCGACAACAACAGCTCACGTCGCCGACCTCCATGGCCACCAAGAGCGAGAATCTCGTGGAAACTTCTACGGAGGAGAAAGGTAAGGTAGATGAGATAAGAAGGAAGAGATATCACTCCCTCCGCCGCCGGAGAAACCAGAGGCTGGAGATTGTTGCGGTAGCGGCTGCGTACGGTGCGTT…	556	1	AT5G17280.1			similar to Os09g0530900 [Oryza sativa (japonica cultivar-group)] (GB:NP_001063752.1); similar to unknown [Populus trichocarpa] (GB:ABK92656.1)	59.49	79	29	3	77	304	6	79	3e-33	72.8
MLN2.Contig_1285	CATGATGACGCCGTTAACGCCGTCGCCGTCTCTGCTAACGGTACCGTTTATACTGGATCCGCGGACAGACGTATTCGGGTTTGGGCGAAACCCGACGACTCGAAACGACACGAGTTAGTCGCGACATTAGAAAAACACAAATCTGCTGTTAACGCTCTGGCATAAACGACGACGGATCGGTTTTGTTCTCCGGTTCGTGTGACCGGTCAATTTTGGTTTGGGAGAGAGTGGACAGCTCTAACTACATGGCGGTGAGTGGTGCTTTGAGAGGACACGACAAAGCAATACTTAGCTTGTTTAACGTGTCTGATTTGCTCCTAAGTGGATCTGCTGATCGGACGGTCAGGATTTGGCGGCGCGGAACCGACGGTTGTTATAGTTGCTTGGAGGTGCTTTCCG…	558	1	AT1G24530.1	transducin family protein / WD-40 repeat family protein		similar to transducin family protein / WD-40 repeat family protein [Arabidopsis thaliana] (TAIR:AT1G24130.1); similar to unnamed protein product [Vitis vinifera] (GB:CAO42478.1); contains InterPro domain WD40 repeat-like (InterPro:IPR011046); contains Int	86.92	130	17	0	162	551	288	417	4e-73	212
MLN2.Contig_1286	CACAGCAGGTAATGCTAGTCAGATTAGTGATGGTGCTGGAGCTGTACTGCTAATGAAGAGGAGCTTGGCGATGAAGAAGGGACTTCCCATTCTTGGAGTATTCAGGAGCTTTGCTGTTACTGGTGTGGATCCGGCTGTAATGGGTATCGGTCCAGCTTATGCCATTCCCGCTGCAGCCAACCTTGCAGGACTCAAAGTTAGCGATATCGATCTATTTGAGATCAATGAGGCATTTGCATCTCAGTATGTGTACTGTTGCAAGAAGCTGGAGCTGGATGTGGAAAAGGTCAATGTTAATGGAGGAGCCATTGCTATTGGCCATCCTCTGGGTGCTACAGGAGCTCGATGTGTTGCGACATTGTTGCATGAGATGAAACGGAGAGGGAAAGACTGCCGCTT…	596	1	AT5G48880.3	KAT5/PKT1/PKT2 (PEROXISOMAL 3-KETO-ACYL-COA THIOLASE 1, PEROXISOMAL 3-KETO-ACYL-COA THIOLASE 2); acetyl-CoA C-acyltransferase	Encodes a peroxisomal 3-keto-acyl-CoA thiolase 2 precursor.	Identical to 3-ketoacyl-CoA thiolase 5, peroxisomal precursor (KAT5) [Arabidopsis Thaliana] (GB:Q570C8;GB:O65339;GB:Q9S774); similar to KAT2/PED1 (PEROXISOME DEFECTIVE 1), acetyl-CoA C-acyltransferase [Arabidopsis thaliana] (TAIR:AT2G33150.1); similar to	92.98	171	12	1	2	514	288	457	3e-76	281
MLN2.Contig_1287	GTCTAGGGTTTTGCACCACACAATCGCCGAACGAATCCAACACCATGGGACGAAGACCAGCGAGATGCTACCGTCAGATCAAGGGGAAGCCCTACCCGAAGTCCCGCTACTGCCGCGGTGTCCCCGACCCCAAGATCCGCATCTACGACGTCGGCATGAAGAAGAAAGGAGTCGACGAGTTCCCTTTCTGCGTCCACCTCGTCTCCTGGGAGAAGGAGAACGTCTCCAGCGAAGCCCTCGAGGCTGCTCGTATCGCCTGCAACAAGTACATGGTCAAATCCGCCGGAAAAGACGCCTTCCATTTGAGGATTAGGGTTCACCCTTTCCATGTCCTGAGGATCAACAAGATGCTCTCGTGCGCTGGGGCTGATAGGCTTCAGACTGGTATGAGAGGTGCGT…	590	1	AT1G66580.1	60S ribosomal protein L10 (RPL10C)		Identical to 60S ribosomal protein L10-3 (RPL10C) [Arabidopsis Thaliana] (GB:Q93W22;GB:Q9C6H7); similar to 60S ribosomal protein L10 (RPL10B) [Arabidopsis thaliana] (TAIR:AT1G26910.1); similar to 60S ribosomal protein L10 (EQM) (GB:P93847); similar to unk	86.26	182	25	0	45	590	1	182	2e-86	315
MLN2.Contig_1288	GGTGGTGGAGACACGCACAACAACATCTCCACCATCTTCCCTTTCCTCAGGAACGGTGGGATCCCTTCGTCGCTTCCTCCTCTCAGGATCTCAAACAGTGCTCCAGTGACACCACCTGTCTCGTCTCCATCATCTAAACACCCCAAGGCGTTACCCACTTGGGGGGAATGTTTTACCAACCAGTCTGCTAAACAGTCAATGTCGTCTTTCAACTACCCGTTTTACGCGGTCTCTGCACCGGCGAGCCCCACTCATCACCGCCAGTTCAATGCTCCCCCGGCTACTATACCTGAGTGTGATGAGTCTGATGCCTCCACTGTTGATTCTGGTCATTGGATAAGCTTTCAGAAGTTCTCACAACAACAGCCGTTCCTTGGCGTTTCTGCAGTGCCAGCCTCT…	604	1	AT1G19350.6	BES1 (BRI1-EMS-SUPPRESSOR 1)	Encodes brassinosteroid (BR) signalling protein that accumulates in the nucleus as dephosphorylated form in response to BRs. Is phosphorylated by the BIN2 GSK3 kinase. It synergistically interacts with BIM1 to bind to E box sequences (CANNTG). The protein	Identical to Protein BRASSINAZOLE-RESISTANT 2 (BZR2) [Arabidopsis Thaliana] (GB:Q9LN63;GB:Q8LCX8;GB:Q94JU1;GB:Q9SEG5); similar to BZR1 (BRASSINAZOLE-RESISTANT 1) [Arabidopsis thaliana] (TAIR:AT1G75080.2); similar to BZR1 (BRASSINAZOLE-RESISTANT 1), trans	84.69	196	26	6	7	582	142	332	3e-77	284
MLN2.Contig_1289	GCTATCTCATTTCTTCAAACCTTATCTTTCCTCAAAGAACACAACACAGACGATGGCGTCGCTGCTAATCGGAGCTCCTCCGCGACTCACCGTCCCATCATCGTCTAGAAGGCTATCATCATCTCACTCGGAAACCGTCGGTGCATCTCTCCCTCGCTTCACTCAGCAACTCTCTCTCTCCGCTTCGTCATCACCCAGCTCAATTCCACTTGTGTACTGCGGCCGAGGCGACCGCAAAACAGCGAGAGGAAAGCGTTTCAATCACTCCTTCGGGAATGCGAGGCCACGGAACAAGGATAAAGGAAGAGGTCCGCAGAGAGTACCAGTCCCTCCTGCACCACCGAGGAAGGATAAGTTTGAGAACGATGAGAAGATCAAAATCGACATTGACGAGTCCCT…	507	1	AT2G38140.1	PSRP4 (PLASTID-SPECIFIC RIBOSOMAL PROTEIN 4); structural constituent of ribosome	plastid-specific ribosomal protein 4 (PSRP4) mRNA, complete	Identical to 30S ribosomal protein S31, chloroplast precursor (RPS31) [Arabidopsis Thaliana] (GB:O80439); similar to unnamed protein product [Vitis vinifera] (GB:CAO15799.1)	80.7	114	22	1	53	394	1	113	2e-26	114
MLN2.Contig_129	CCAGATATACATCTCCGACGCTGGCATCCTCGCCGTCTGCTACGGTCTCTACCGCTACGMTGCTGTCCAAGGAGTTGCCTCGATGGTCTGCTTCTACGGAGTTCCTCTTCTGATTGTCAACGGGTTCTTAGTTTTGATCACTTACTTGCAGCACACGCATCCTTCCCTGCCTCACTATGACTCGTCTGAGTGGGATTGGTTGAGGGGAGCTTTGGCCACCGTTGACAGAGACTACGGAATCTTGAACAAGGTCTTCCACAATATCACGGACACGCACGTGGCGCATCACCTGTTCTCGACCATGCCGCATTATCATGCGATGGAAGCTACGAAGGCGATAAAGCCGATACTGGGAGAGTATTATCAGTTCGATGGGACGCCGGTGGTTAAGGCGATGTG…	730	3	AT3G12120.2	FAD2 (FATTY ACID DESATURASE 2)	Major enzyme responsible for the synthesis of 18:2 fatty acids in the endoplasmic reticulum. Contains His-rich motifs, which contribute to the interaction with the electron donor cytochrome b5.	Identical to Omega-6 fatty acid desaturase, endoplasmic reticulum (FAD2) [Arabidopsis Thaliana] (GB:P46313); similar to FAD3 (FATTY ACID DESATURASE 3), omega-3 fatty acid desaturase [Arabidopsis thaliana] (TAIR:AT2G29980.1); similar to delta-12 desaturas	89.38	160	17	0	2	481	224	383	2e-85	311
MLN2.Contig_1290	TGCTCTCTTCGGACTTCTTGGAGCTATGTTATCTGAACTTCTCACTAATTGGACTATCTATGCCAACAAGGCGGCTGCTCTTGTCACACTCCTATTCATCATAACAATCAACTTAGGACTAGGCTTGTTGCCTCGGGTTGACAATTTCGCGCACATTGGAGGGTTCTTAACCGGGTTATGCCTCGGGTTTATCCTCCTTGTCCGGCCACAGTACGGCTGGGAAGCTTCCCGCACCAACACTTCCGTTACCAAACGCAAGCATAGCATGTACCAGTACGTGCTGTTCGTAGTCGCAGCGGTTCTACTTGTGGTTGGGTTAACTGTTGGATTGGTGATGCTTTTCAAAGGAGAGAATGGGAACAAGCATTGCAAATGGTGTCATCGCCTCAGCTGTTTCCC…	553	1	AT1G63120.1	ATRBL2 (ARABIDOPSIS THALIANA RHOMBOID-LIKE 2); serine-type endopeptidase	AtRBL2 has been identified as a rhomboid protein involved in regulated intramembrane proteolysis (RIP). The enzyme has the proteolytic activity and substrate specificity comparable to the Drosophila Rho-1 protein.	similar to rhomboid family protein [Arabidopsis thaliana] (TAIR:AT1G12750.1); similar to rhomboid family protein [Arabidopsis thaliana] (TAIR:AT1G12750.2); similar to unnamed protein product [Vitis vinifera] (GB:CAO63691.1); contains InterPro domain Pepti	90.91	132	12	0	2	397	179	310	1e-54	208
MLN2.Contig_1291	CGAATCCAGCTCAACCACATACGAGTCCTCGATTCGTTTAAACCCACGCTCGATCTCTCGTTCTCGCTCACGATCAAAGTCAGGAACCGCGATGTCTTCTCCCTTGATTACGATTCGCTTGTGGTCTCGATTGGGTATAGAGGGAGAGAGCTAGGGCTTGTCAAGTCTCGAGGTGGACACCTTCGTGCTCGTGATAGCTCTTATATTAACGCGACTCTTGAACTCGATGGTCTAGAGGTTGTTCACGATGTGATTTACTTGATCGGTGATTTGGCTAAAGGTGTTATCCCTTTTGATACCATCGCTCAGGTCAAAGGTGATCTTGGTCTTCTTCTCTTTCAAATCCCAATTCAGGGAAAAGTGTCATGCGAGGTGTTTGTTAATATTAACAACCAGAAA…	550	1	AT4G13270.1			similar to unknown protein [Arabidopsis thaliana] (TAIR:AT1G52330.1); similar to unnamed protein product [Vitis vinifera] (GB:CAO65539.1)	89.44	142	15	0	1	426	74	215	8e-69	256
MLN2.Contig_1292	GTTCTTCAAGAAAAGCAGTTGCTGGGTCAAGTGTTCGAGCTACTTCCTCAGCTGATTTCGCAGAGAACCGAACCAGCAGCAGACTCGTCCCAAGCAACGGTCGGTCCTCGACAACTCAGAGGACCCAGTTTGCGCCTTCCTCCTCAAAGGCCGCACCGTCGAGAATTCCTCCTGACGTTACACTAGAGTTCCTCAGTATTGGGAACGGGAAGAGGAAGTGATGGATGATAAATTATTTATCCATCTTTTGTTTGACGAGTTATATTACCTTTTATCCTTGTGGTTGATTACACTGATAACAGTGTGGATATTAATATTTTCGAATTATGTTTTTAGCCGTATAAACAACATATT	354	1	AT1G04440.1	CKL13 (CASEIN KINASE LIKE 13); casein kinase I/ kinase		similar to CKI1 (CASEIN KINASE I), casein kinase I/ kinase [Arabidopsis thaliana] (TAIR:AT4G14340.1); similar to CKL10 (Casein Kinase I-like 10), casein kinase I/ kinase [Arabidopsis thaliana] (TAIR:AT3G23340.1); similar to CKL8 (Casein Kinase I-like 8),	72.15	79	15	3	3	218	391	468	5e-21	95.9
MLN2.Contig_1293	GAAGAACGCTGTTCCTGAGGAAGTAAACTCATCTGCTCCGAGGGATGATGACCCGGAGAGCCGTTCAAAGTTCTACGAGAGTGCTTCTGCGAGAAAGAGAACGGTGACTGCAGAGGAAAGAGAGAGAGCCATCAATGCAGCTAAAACGTTCGAGCCAACAAACCCTTTCTTCAGAGTTGTTCTCCGACCATCTTATCTATACAGAGGCTGCATCATGTATCTGCCTTCTGGATTTGCTGAGAAGTACTTAAGTGGGATCTCGGGATTCATCAAGGTCCAGCTCGGGGAGAAACAGTGGCCAGTGAGATGCCTCTACAAAGCAGGGAGAGCCAAGTTCAGCCAAGGATGGTACGAGTTCACTCTGGAGAACAACCTAGGAGAAGGTGACGTCTGCGTGTT…	532	1	AT3G18990.1	VRN1 (REDUCED VERNALIZATION RESPONSE 1)	Required for vernalization. Essential for the complete repression of FLC in vernalized plants. Required for the methylation of histone H3	similar to RTV1 (RELATED TO VERNALIZATION1 1), DNA binding / transcription factor [Arabidopsis thaliana] (TAIR:AT1G49480.1); similar to reduced vernalization response 1 [Brassica rapa] (GB:AAR92199.1); contains InterPro domain Transcriptional factor B3; (	96.69	151	5	0	2	454	188	338	2e-82	301
MLN2.Contig_1294	GGATCGAATCAAATCGAAGAAGACGATGAAGATCTTCCACGTTCCCTGTCTACAAGACAACTACTCGTATCTGATAATCGATGAGAGCACCGGAGACGCGGCGGCTGTGGATCCAGTTGAACCGGAGAAAGTGATTCAGTCGGCTGAGCATCACCACGCCAAGATCAAGTTCGTCCTCACCACGCATCACCACTCGGATCATGCTGGTGGCAACGAGAAGATGAAGCAGCTGGTACCTGGAATCAAAGTCTATGGAGGCTCTCTTGATAAGGTCAAGGGATGCACTGATGCTGTCGATAATGGTGACACCTTGTCTTTGGGTCAAAATATTAACATATTAGCTCTTCACGCCCCTTGTCACACCAAGGGTCACATTAGTTACTATGTCACTGGCAAAGA…	617	1	AT3G10850.1	GLX2-2 (GLYOXALASE 2-2); hydroxyacylglutathione hydrolase	glyoxalase II cytoplasmic isozyme (Glx2-2) mRNA, complete	Identical to Hydroxyacylglutathione hydrolase cytoplasmic (GLX2-2) [Arabidopsis Thaliana] (GB:O24496;GB:O04844); similar to GLX2-4 (GLYOXALASE 2-4), hydroxyacylglutathione hydrolase [Arabidopsis thaliana] (TAIR:AT1G06130.1); similar to GLX2-4 (GLYOXALASE	90.86	197	18	0	26	616	1	197	1e-104	375
MLN2.Contig_1295	GGTCGTCCACCTCTCTCTCTCTCTCTAGCGGCGCAGATGGATCCCGATGCAGTGGCGAAGGCCTTCGTGGAACACTACTACTCAACCTTCGACACCAACCGCGCCGGTCTAGCCGGTTTCTACCAGGAGGCTTCCATGCTCACCTTCGAGGGCCAGAAGATCCAAGGAGTCCAGAGCATCGTCGCCAAGCTCACCTCTCTCCCCTTCCAGCAGTGCAAGCACAATATCTCCACTGTCGATTGCCAGCCTTCTGGTCCCGCCTCCGGTATGCTCGTTTTCGTCTCCGGCAACCTCCAGCTCGCCGGCGAGGAGCACGCCCTCAAGTTCAGCCAGATGTTTCACTTGATGCCGACTCCACAAGGAAGCTTTTACGTGTTCAACGATATCTTCAGGCTCAAC…	630	1	AT1G27970.1	NTF2B (NUCLEAR TRANSPORT FACTOR 2B); Ran GTPase binding / protein transporter	Encodes an ortholog of yeast NTF2, a nuclear envelop transport protein that functions as the nuclear import receptor for RanGDP, an essential player in nucleocytoplasmic transport.	Identical to Nuclear transport factor 2 (NTF2) [Arabidopsis Thaliana] (GB:Q9C7F5;GB:Q1H566); similar to NTF2A (NUCLEAR TRANSPORT FACTOR 2A), Ran GTPase binding / protein transporter [Arabidopsis thaliana] (TAIR:AT1G27310.1); similar to putative nuclear t	95.2	125	6	0	31	405	2	126	6e-66	246
MLN2.Contig_1296	AGAGCTCAACCGCTTTGCCCGCTAAAAACTCAGCTAATAATAGCAACTGTAGAAGTTATCTTGGTGTGGATGCGAAGAAGAAGAATGAGCACACAATTGTACTGAAGGAAGATAGCGTTTGGGATAATAGCTGTAGCGAGGAGGCTAAGAGCATCGCTGCAGCCGCTCTAGCTGCTGTCAGAAACGCTACTGCAACCGCTGCAGCTGCATCTAGCCGTGGCAAGGTTGAGATAACAGAGGTCAAAGACTTTGCTGGGCAAGAAATCGAAGTGAAGCGGTTAGTGGAAGCGGGTTCAAAGGAAGCCTCCTCCTCTGCATCGACCTCAGGGGTTGATGCGGTTCTTGAGCAGATAAAAAAGAAACAGAAGCTGAGCGTTTTGGACAAGACGAAGAAAGATT…	593	1	AT5G30490.2			similar to unknown [Populus trichocarpa] (GB:ABK95758.1); contains InterPro domain Bucentaur or craniofacial development (InterPro:IPR011421)	79.4	199	32	3	6	575	40	236	5e-60	227
MLN2.Contig_1297	GTTTGTGGTTTATGATCAGAGGAACAAGTGGGGACTAGACTGGAATAGTAACCCAAATGAAGAAGGTATGGAGGATGATGAAGAAGTTGTTGGGGCTGCGCAGGTTGAAAAAGAAGATGTTGCAGAAATGAGTGAGGGCTCTGAAGATGATGATGATGCACCTGCTAATAATGCAGCAGCAAATAATTATGAAAGTGGATCAGAGGATTACAGCAGCAGTGATTCATGAACTGAGGTGTAGCATGTGG	248	1	AT1G28420.1	HB-1 (homeobox-1); transcription factor		similar to homeobox transcription factor, putative [Arabidopsis thaliana] (TAIR:AT5G44180.1); similar to unnamed protein product [Vitis vinifera] (GB:CAO66398.1); similar to DDT; Homeodomain-related [Medicago truncatula] (GB:ABN08705.1); similar to hypoth	65.31	49	16	1	2	145	1632	1680	5e-07	49.3
MLN2.Contig_1298	TGAGTTGTCTAAGACTGGTCCTGACGCTGTCTCTAAGGTTGTTGATATTGTTAAGAGAAGTCCCGAGAGTGATGTGTTGTTTAGAATCGAGAGAGGGAATCAAGATTTGGTTGTTCGGGTTAGGCCTGATAAGAACTTCGATGGGACGGGGAAGATCGGTGTTCAGCTCTCTCCAAACGTTAGAATCACTAAGGTGAGGCCGAGGAACGTTCCCGAAGCGTTTAGGTTCGCGGGGAAGGAGTTTATGGGGCTGTCTTCCAATGTCTTGGACGGTCTGAAGCAGACGTTCTTTAACTTCTCTCAGACAGCGAGTAAAGTGGCAGGACCCGTGGCGATCATTGCGGTGGGAGCAGAGGTCGCGAGATCGAACACCGACGGGCTTTACCAGTTCGCGGCGCT…	535	1	AT2G32480.1	membrane-associated zinc metalloprotease, putative		similar to membrane-associated zinc metalloprotease, putative [Arabidopsis thaliana] (TAIR:AT1G05140.1); similar to Os03g0579000 [Oryza sativa (japonica cultivar-group)] (GB:NP_001050547.1); similar to unnamed protein product [Vitis vinifera] (GB:CAO24003	90.45	178	17	0	2	535	242	419	1e-65	245
MLN2.Contig_1299	GCAGCGGAGGAATCGTCGGAGGATAGCTCATCGTCGATCGGAGAGATCAGCGATAACGAGGAGGAGGACGAAGACGACGACGTTTCATCACAAGGAGAAGGAGGAGCCCTTGATTCGTTTAGTTCCTCTTTAGAAGACTCTCTACCGATTAAGAGAGGGTTATCAAACCATTACGTGGGTAAATCAAAATCTTTTGGGAATTTAATGGAATCTAGCAACATCAACGCAAAGGATCTGGAAAAAGTAGAAAACCCGTTCAATAAGAAGAGGAGGTTGATTGTTGCAAATAAGCTGAGGAGTAGAGGAAGATCTATGTCAGTTTCCAGTTTCTACACTTGGCAAAACCCTAATTCCACGCCTTTACTTGCACTCCAAGAACCCAATAAAGTGGATGCTGAC…	572	1	AT2G24550.1			similar to unknown protein [Arabidopsis thaliana] (TAIR:AT4G31510.1); similar to unknown [Populus trichocarpa x Populus deltoides] (GB:ABK96563.1)	67.12	146	36	3	145	546	106	245	2e-48	188
MLN2.Contig_13	GGCGCAAATCTCGTCGTCTTTCTTCAGTCTCTCGCTCTCCATTTGTTTGTAGATCCGCTCGCGTTTTCAATCCAGAACCAATACGTACCTGAATAGAGACAGAGATGGCACTTCTCGAGGGATTTTACAGAGTCATCATGCGCCGTAACTCCGTCTACGTCTCCTTCATCATCGCCGGCGCTTTCTTCGGCGAAAGGGCTGTGGATTATGGTGTTCATAAGCTYTGGGAAAGCAAAAACGTTGGGAAACGGTATGAAGACATCTCTGTGTTGGGTCAAAGGCCTATTGAAGAATGAGATTTCTCCTTTGTTGTTGTTTYGCACTTACAAGTCTCTCTTTCTTTGTTGAATAAAATCATTGGGATGATGGTTTTCATATACTTTCACCTAAACCTGCTAT…	453	2	AT3G52730.1	ubiquinol-cytochrome C reductase UQCRX/QCR9-like family protein		similar to unknown [Populus trichocarpa] (GB:ABK92805.1); contains InterPro domain Ubiquinol-cytochrome C reductase, UQCRX/QCR9-like; (InterPro:IPR008027)	89.83	59	6	0	117	293	14	72	1e-26	115
MLN2.Contig_130	GAAAACCAAACTCATCTCATCTTTTAATTACAGCTTTGAAACACAACACAAACCAAACCTATCTACTTCTGTCTCTAGATGGCTCGTTCCCTTTCGATCTCTCTCTCTAAAGTCCGACTCACCGCATCTGCATCCTCTCTCCTCCCTTCATCACACCTCCTTTCCTTCCGATCTCAATCCTCCGACCGTCGCGGCGATCTACACGAAACCGACACCGCCTCGCCGTCGGATCCCTTAATACAGAAGCTAGAAGACGCTTCACCGGATATTCGTACGCCGAGCTGCACCTGATTGGCTCCCGTTTGTTCCAGGTGCTTCCTATTACGTCCCGCCTCCAGGATCTGGGATCCCAGACTCATGGGGTCGCTCAGCTCGTTGCGAAGCTGGCTAACCCGTTAA…	736	2	AT1G16840.1			similar to unknown protein [Arabidopsis thaliana] (TAIR:AT1G78890.1); similar to hypothetical protein OsI_027317 [Oryza sativa (indica cultivar-group)] (GB:EAZ06085.1)	74.24	66	11	2	79	258	1	66	4e-46	46.2
MLN2.Contig_1300	CATGGCGCTTCCATCTGCAGTTGTCTACTCCGATTTGTGGGTGTGCTCGGGTTTGGGGACTTTCCCGTTCTGCCGCCTCCGTTTCAGAGGCTCTCATCTGCTCTTTTGTTCCATGCTTTGTGGACTTTCACGAGTCTGCCTGTGCTTCAAACGCCGGAAGGAGACTTTCGCTTTGTTAGTGTCTGCCTCTCCTACTCCTCTGCTCCGGGTAATTTATTGTGTGGAGTGGCCGGTTTTAGCCGTCAACCTACCGCCTACTCCATCAGAAAGTGCTCGTCATTGGCCAGGTGTAGTCTTTTGGGTTTGGATAATGACCTTCTGTGCCTAAATCTCTGGACTGGGTTTTTGATTGGAGCTAGTTCATCGATGCCAATGGCCGGGGCCGGAATTGTCAACCGC…	500	1	AT5G26740.3			similar to unknown protein [Arabidopsis thaliana] (TAIR:AT3G05940.1); similar to unknown [Populus trichocarpa] (GB:ABK95399.1); contains InterPro domain Protein of unknown function DUF300 (InterPro:IPR005178)	30.56	36	25	1	166	273	84	118	1.7	28.9
MLN2.Contig_1301	CCTCTCTGCTGCCTTTCTCCTTGCCTGCACCGTAGCTGGTTACAAATCCTTGTTCATCTCTTACAAGGGAAGGTCTGTTCCCAACTCTGTCTTGTTCAAAAGCACCACCTTCTCTGTCTTCTTCAACATCGCCTTGATAACATCTGGACTAGCATTGTCTCTGTTGCTATGGCCAACCATTACAGAGCAACTTCACTTGACCCGTAACGTTCACCGGAACTTAGAGACCAGCTGCCCCACGGCTAAGACCGGCCTCCTTGGTGGAGGCGCCTTTGTGTCACTGGACTCGTGCCTTTTCTGGTTGGTCGCTTTGATGCTCGCTGATAACGCCCGTGAAGACCATTTTGATGAAGCTGATAGCAGAAACGGCGATGGAAACTCTTCCTCCAGGGATGTTAA…	601	1	AT4G31130.1			similar to hypothetical protein [Vitis vinifera] (GB:CAN64246.1); contains InterPro domain Protein of unknown function DUF1218 (InterPro:IPR009606)	95.65	138	6	0	2	415	58	195	1e-62	235
MLN2.Contig_1302	GTATTGGAAATTTTCAGTTTTATCTCAGTTTCATTCTTTGCTTCTCTCTCTCTATAATCTTTGAAAGCACGACGATAGAGAGAGAGAGATGGATCCAGACGCAGTAGCCAAGGCCTTCGTGGAGCACTACTACACGACGTTCGATTCGAATCGCGCGGGGTTGGTCTCTCTGTACCAGGAAGGATCCATGTTGAGCTTCGAAGGGCAGAAGATCCAGGGCTCTCAGAACATCGTCGCGAAGCTCACCAGCCTTCCTTTCCAGCAGTGCAAGCACAACATCACCACCGTCGATTGCCAGCCCTCTGGTCCCGCCAACGGCATGCTCGTCTTCGTCTCCGATGTTCCATTTGGTATCGAATCAGGGAAACTACTACGTTTTCAACGACATATTCAGGTTGA…	581	1	AT1G27310.1	NTF2A (NUCLEAR TRANSPORT FACTOR 2A); Ran GTPase binding / protein transporter	Encodes an ortholog of yeast NTF2, a nuclear envelop transport protein that functions as the nuclear import receptor for RanGDP, an essential player in nucleocytoplasmic transport.	similar to NTF2B (NUCLEAR TRANSPORT FACTOR 2B), Ran GTPase binding / protein transporter [Arabidopsis thaliana] (TAIR:AT1G27970.1); similar to unknown [Populus trichocarpa] (GB:ABK93835.1); contains InterPro domain Nuclear transport factor 2; (InterPro:IP	92.77	83	6	0	89	337	1	83	6e-50	161
MLN2.Contig_1303	GGACGAACTACTTCATCCTCTTGATTTTCGTTATGGGTCTTCCACTTATCACCCGACCTCTTGCCATTATTGGTGCTGCTCTTACTGCTTTAAGCTTAGCTTTCCTTAACGACAGCTTTGCAGCTACTTTCAATGAAAAGGCTATCCGGACCATAAGGCAATTCTCGCCGCATTTGGCTGCAAAGATGAGGCCTCCCCACATGCCTGTCATTCGTGGGCGATCTGCGTCTAGAAAGACGGTCTACGTTTGTGGCCAACCACGTTTGGTGTTCGTGTTGCTTGGCTTAACCGCTAGCTTTGTCTTGTGGTTTGCTTCCTGCGGTTTGTTGTGGGTCCTTTATGCACTTGCCACTGCTCTTCTCTTGATCATGCTTCATGCAAGCCTGAGAACTCCGAACC…	591	1	AT3G11397.1	prenylated rab acceptor (PRA1) family protein		similar to prenylated rab acceptor (PRA1) family protein [Arabidopsis thaliana] (TAIR:AT5G05987.1); similar to hypothetical protein [Vitis vinifera] (GB:CAN72272.1); contains InterPro domain Prenylated rab acceptor PRA1 (InterPro:IPR004895)	91.56	154	13	0	3	464	56	209	3e-78	287
MLN2.Contig_1304	GGGTCAGGAGAGGTACAGAGCCATCACTAGCGCTTACTACCGAGGCGCAGTGGGTGCCCTCCTTGTCTACGACATCACCAAGAGGCAGACCTATGACAATGCCTTGAGGTGGCTCCGCGAACTCAGAGACCATGCTGATTCCAACATCGTCATCACGATGGCTGGCAACAAATCCGATCTTAACCACTTGAGATCCGTTGCTGAGGAAGACGGTCACAATCTGGCCGAGAAGGAAGGTCTCTCTTTCCTTGAGACTTCTGCTCTCGAAGCAACAAACGTCGAGAAAGCGTTTCAGACCATCTTAGGAGAGATCTACCATATCATAAGCAAAAAGGCACTGGCTGCACAAGAAGCGGCTGCTGCTAACTCCGCCATTCCAGGACAGGGAACTACGATTAA…	529	1	AT3G46830.1	AtRABA2c/AtRab11A (Arabidopsis Rab GTPase homolog A2c); GTP binding		Identical to Ras-related protein Rab11A (RAB11A) [Arabidopsis Thaliana] (GB:Q96283); similar to AtRABA2d (Arabidopsis Rab GTPase homolog A2d), GTP binding [Arabidopsis thaliana] (TAIR:AT5G59150.1); similar to Ras-related protein Rab11C (GB:Q40193); contai	94.59	148	8	0	2	445	70	217	2e-67	251
MLN2.Contig_1305	GGATATTCCCTCTTCGTCTTCTCCATCCTTAGCTTCCGCAGACGGTGAGCTCCACGAAGACGACATCTTCGCAATCGACATAACTCACGCGCCTCGTCCTTCTCCTACGCAGCAACAACACCCACCTGCTCGTCACCTTCAAAGAAGCAAAAGCAGTTTGAAAAACGTGGAAGCTTCCGGTATCCTCGCCGCTCTCCCCGAGCCTTCAGGTGGAAACAGTTACCTTAACCACGTGTTTCACCACAAACCCGCCTCTGTTCTCTCCACTTCAGTCTCCTCCACAGCTTCTTCCTCCTCTTCTTCAGGCGGTGGTGCTCGAACCATCCCCGCCGCTCCTAAACCGCTTCAAGAGAGGCTTCCGTTTACATCTTCTGGAGGGAAGTTTCCTCAGTCAGCTCC…	559	1	AT3G15040.1			similar to unknown protein [Arabidopsis thaliana] (TAIR:AT4G21970.1); similar to hypothetical protein [Vitis vinifera] (GB:CAN76322.1); contains InterPro domain Protein of unknown function DUF584 (InterPro:IPR007608)	73.71	194	30	6	41	559	23	216	2e-55	211
MLN2.Contig_1306	GACAGTTGGTGGGTCAAATGGTCATTTCGAACTGAATGTATTTAAGCCGGTGATTGCAAGCGCTCTCTTGCATTCCGTGAGGTTAATAGCAGATGCTTCAGCTTCGTTTGAGAAAAACTGTGTAAGGGGTATTGAGGCCAACAGAGAAAGGATCTCAAAGCTATTGCACGAGTCTCTTATGCTTGTGACATCATTGAATCCGAAAATCGGATATGACAATGCTGCAGCAGTTGCCAAGAAAGCTCACAAAGAAGGATCGACACTGAAGGAAGCGGCTCTGAAGTTAGGTGTTCTTACTTCTGAAGAGTTTGATACCCTTGTTGTTCCCGAGAAGATGATCGGTCCCTCCGATTGATGTTGAGCCAAAAGCTTCATTTTGCCATGTTTTATTCTTGATAA…	516	1	AT2G47510.2	FUM1 (FUMARASE 1)	fumarase (FUM1)	Identical to Fumarate hydratase 1, mitochondrial precursor (FUM1) [Arabidopsis Thaliana] (GB:P93033;GB:O24649); similar to fumarate hydratase, putative / fumarase, putative [Arabidopsis thaliana] (TAIR:AT5G50950.2); similar to fumarate hydratase, putativ	97.44	117	3	0	2	352	376	492	9e-59	222
MLN2.Contig_1307	ATCTTGGCTTTGTCTAGGCAAAAGCTTCCTCAGCTTCCGGGGACTTCCATCGAAGGAGTTGCCAAGGGTGGATACACGATCTCTGACGACTCTACTGGGAACAAACCTGATGTGATCTTGATTGGGACTGGCTCTGAGCTGGAGATTGCTGCACAGGCTGCTGAGGTGATTAGGAAAGAAGGCAAGACCGTTAGAGTTGTGTCGTTTGTCTGCTGGGAGCTGTTTGATGAGCAGACGGATGAGTACAAGGAGAGTGTTTTGCCGTCTGGTGTGTCGGCTAGAGTTAGTATTGAAGTGGCTTCGACTTTTGGGTGGGGGAAGATTGTTGGAGGGAAAGGGAAGTCTATTGGTATTAACTCGTTTGGGGCTAGCGCACCGGCGCCTTTGCTCTACAAGGAG…	596	1	AT3G60750.1	transketolase, putative		similar to transketolase, putative [Arabidopsis thaliana] (TAIR:AT2G45290.1); similar to unknown [Populus trichocarpa] (GB:ABK95795.1); similar to Transketolase, chloroplast precursor (TK) (GB:Q43848); similar to unknown [Populus trichocarpa] (GB:ABK92500	94.63	149	8	0	1	447	593	741	3e-64	241
MLN2.Contig_1308	CGCTCGAGCCCGAGCCACCACTAAAAAATCTCAATCACAATCCCTCGCCAAGACCGCCCTCACCGAAGCCGACGACGTGATCGCTCTCTCCCCAGACGATGCCGCCGGCCACATAGTCCGCGCCTTGTCTCTGGATCTGCTCGGCCACCACACCGCCGCTCTCAAATCGTTCGATACGGCGCTGACTTATCCGCGGCTGAAGTCGCTGTCCGTGGGGGAACGAGCAGACGCGCTTGTGAAGAGAGCTGAGATGAAGGTCGCTGTGAATCGGCGGCGGAGAAATGATTCGGCGATCGAAGATCTGGAAGAGGCGGTTAGGCCCGCCGCCGCGACGGATACGGCGAGGATATTCCGTCTTTTGGGGGAGTGTTATGAGTACAAGGGCTTGGGAGAGAAGGC…	572	1	AT5G65520.1	binding		similar to unnamed protein product [Vitis vinifera] (GB:CAO23656.1); contains InterPro domain Tetratricopeptide-like helical; (InterPro:IPR011990); contains InterPro domain Tetratricopeptide region (InterPro:IPR013026)	87.84	148	18	0	2	445	56	203	2e-66	248
MLN2.Contig_1309	ACGTACCCGTCGAGGTTCTCAAATACATGGACCAGAAGGTTGACATGTCTGTGAATGAACTTGACCGCCGCGTCCCACCAGTGGTCAAGCAAGTCTCTGCACACGCCATCTCAGCTGCTCAGATCGCACCCGTCGTGGCACGTGCCTTCGCCTCCGAGGTTCGACGTGCTGGAGTTGTGGAAACCGCTTCCGGGATGGCTAAGTCCGTCTACACCAAGTACGAGCCTGCGGCTAAGGAGCTGTACGCGAGCTACGAGCCGAAGGCAGAGCAGTGCGCCGTTTCGGCTTGGAAGAAGCTGAACCAGCTCCCTCTGTTCCCGAGGCTGGCTCAAGTCGCTGTGCCGACGGCCGCTTTCTGCTCTGAGAAGTATAATGATACGGTGGTGAAGGCGGCGGAGA…	595	1	AT3G05500.1	rubber elongation factor (REF) family protein		Identical to REF/SRPP-like protein At3g05500 [Arabidopsis Thaliana] (GB:Q9MA63); similar to rubber elongation factor (REF) protein-related [Arabidopsis thaliana] (TAIR:AT2G47780.1); similar to unknown [Populus trichocarpa] (GB:ABK93466.1); contains InterP	93.53	170	11	1	3	512	78	246	2e-85	311
MLN2.Contig_131	GCTCTATTATTAGGCATTTCATAATCTATCAACAATGGCGATTCGTTCTGGATTGAGCAGAAGAACCCTAGCCGGCCTAAAGGAGACGTCTTCTAAGCTTCTGGGACTCAGAGGAATCCAGACCTTCACGCTTCCTGATCTCCCTTATGATTACAGCGCGCTGGAGCCGGCGATAAGCGGCGAGATTATGCAGATTCATCACCAGAAGCATCACCAGACTTACGTCACTAATTACAACAATGCCCTCGAGCAGCTTGATCAGGCCGTCAACAAGGGAGACGCTTCCACTGTCGTCAAGCTGCATAGCGCCATCAAGTTCAACGGCGGAGGTCATGTGAACCATTCGATTTTCTGGAAGAATCTTGCTCCTGTCAATCAAGGTGGTGGAGAGCCACCGAA…	771	2	AT3G10920.1	MSD1 (MANGANESE SUPEROXIDE DISMUTASE 1); manganese superoxide dismutase	manganese superoxide dismutase (MSD1)	Identical to Superoxide dismutase [Mn], mitochondrial precursor (SODA) [Arabidopsis Thaliana] (GB:O81235;GB:Q9SRK3); similar to superoxide dismutase (Mn), putative / manganese superoxide dismutase, putative [Arabidopsis thaliana] (TAIR:AT3G56350.1); simi	92.58	229	17	0	35	721	1	229	1e-114	409
MLN2.Contig_1310	CTTGCGCCTTGGTGTGAGCCATACCAACGAGTTGGAGCAAGCAACTGCTTTGAAGTACTTATACGGATGGCTGCGGAATCACCCTAAGTATGGATCAATCGCACCTCCAGAGCTTGCTGATTCCCTATACCATGCTGATATTGCTAGATTATTTACTGAAGCCTCTCAGATGAATCCTGAGGACGCCGATGTGCATATAGTGCTAGGTGTTCTCTTCAATTTGTCAAGGGAATTCGATAGAGCAATTACTTCCTTCCAAACAGCTTTACAGCTGAAACCAAACGATTATTCTCTTTGGAATAAGCTTGGCGCAACTCAAGCCAACAGTGTCCAGAGTGCTGATGCCATATCTGCTTATCAACAGGCTCTGGATTTAAAACCTAATTACGTTCGTGCTTG…	621	1	AT5G56290.1	PEX5 (PEROXIN 5); peroxisome matrix targeting signal-1 binding	Encodes the peroxisomal targeting signal type 1 receptor that facilitates peroxisomal protein translocation. It recognizes proteins with the PTS1 consensus sequence (tripeptide SKL or a conserved variant) at the extreme C terminus. The protein has severa	similar to SPY (SPINDLY), transferase, transferring glycosyl groups [Arabidopsis thaliana] (TAIR:AT3G11540.1); similar to peroxisomal import receptor PTS1 [Brassica napus] (GB:ABB92565.1); similar to peroxisomal targeting signal-1 receptor [Citrullus lana	95.5	200	9	0	2	601	529	728	4e-109	390
MLN2.Contig_1311	GATGGCTAAGCTCATTTTCTTCTTAGCCGTACAAATCCTCCTCCTCGCCGTCGTTTCTTCCACCGGAGACGACGGAGAAAACTTTGCCAGAACCATAGATCGGAAGCTTCTCGGGCTCCACAAGAAAGAGAAGCTAACCCATTTCAAAGTCTATTGGCACGACATCTTAAGTGGTCCAAACCCAACCTCCATCATGATTCAACCACCAGTTACAAACACTTCCTACTTCGGAGCCATCTCCATGATCGACAACGCCTTGACGGCGAGAGTTCCGATGAACTCAACTGTGTTGGGCCAAGCTCAAGGCTTCTACGCGGGAGCGGCCCAAAAGGAGTTGGGTTTTCTAATGGCTATGAACTTTGCTTTTAAGACAGGGAAGTACAATGGAAGCACCATTAC…	569	1	AT1G55210.1	disease resistance response		similar to disease resistance-responsive protein-related / dirigent protein-related [Arabidopsis thaliana] (TAIR:AT5G49040.1); similar to disease resistance response protein [Brassica rapa] (GB:ABV89606.1); contains InterPro domain Plant disease resistanc	95.74	188	8	1	2	565	1	187	1e-91	332
MLN2.Contig_1312	CTAATAACTACAATCATACTATCAAAAAAATCTTTCACCACCGTTGAGCACCACTTTGATCCGTCCTTGACCCTAAGCCTCTCAGGTGAGAGCTACAAGACCAAGGCGGTTGAGATGACCGATGCCGGCGCCGGAGACCAGATTTTTCGGCAGACTTCTTCTCACAGCGGAGTCTCATCTTTCTCCAGCGGAAGGGTAAAGAGAGAGAGAGAAGTTTTCAGCGGTGACGGCGAAGAAGAGGCGGAGGAGACGACGGTGGCGGTTGATGGAGAAACGGGGAAGGGAGCTTTCTCCATCGTCACAAAGCCTCGCTTTTACAGCCATTTCACTAATCCTTCTGCAGCTTGTTAATTACTTACTATTAATTTGTTTTTGTTTTTTTCTTTATATATATCCATT…	606	1	AT4G37790.1	HAT22 (homeobox-leucine zipper protein 22); transcription factor	Encodes homeobox protein HAT22.	Identical to Homeobox-leucine zipper protein HAT22 (HAT22) [Arabidopsis Thaliana] (GB:P46604;GB:Q546G6); similar to HAT9 (homeobox-leucine zipper protein 9), DNA binding / transcription factor [Arabidopsis thaliana] (TAIR:AT2G22800.1); similar to unnamed	91.3	23	2	0	280	348	256	278	5e-06	47.8
MLN2.Contig_1313	ACCTTCAGACACGCGTGTTCAGTTCCACCAAGATCAAGCTCACTTCCTCGTGGTGCACGAGACGCAGCTTGCTATTTACGAAACAACCAAGCTCGAATGCATGAAACAGTGGCCAGTGAGAGAATCATCAGCTCCGATCACTCATGCCACGTTCTCATGTGATAGCCAATTGGTCTATGCGAGTTTTATGGATGCAACGATTTGTGTATTTAGCTCTGCTAATCTAAGGTTGCGTTGCCGAGTCAACCCTTCTGCGTATCTACCAGCTAGTCTCAGTAACTCGAACGTACATCCTCTGGTGATTGCGGCACATCCGCAAGAACCAAACATGTTTGCAGTTGGTCTCTCAGACGGAGGTGTTCATATATTCGAACCGGTTGAGTCGGAAGGTAAATGGGG…	529	1	AT1G15750.4	TPL/WSIP1 (WUS-INTERACTING PROTEIN 1)	Encodes a protein with several WD40 repeats at the C-terminus and predicted protein-protein interaction domains at the N-terminus. Together with the TOPLESS-RELATED PROTEINS (TPRs), it is thought to be involved in transcriptional repression of root-promo	similar to TPR1 (TOPLESS-RELATED 1) [Arabidopsis thaliana] (TAIR:AT1G80490.2); similar to TPR1 (TOPLESS-RELATED 1) [Arabidopsis thaliana] (TAIR:AT1G80490.1); similar to TPR4/WSIP2 (TOPLESS-RELATED 4) [Arabidopsis thaliana] (TAIR:AT3G15880.2); similar to C	95.06	162	8	0	2	487	970	1131	2e-87	318
MLN2.Contig_1314	GCTCACAGTTTTGAAAATCCCAATCACTCGCTCTTCTCAAGAACAATGGCGAGAAGACCGGAAGAAGAATACGACTACTTGTTCAAAGTGGTTCTCATCGGAGACTCCGGCGTCGGCAAGTCGAATCTCCTCTCTAGATTCACTCGCAACGAGTTCTGCTTGGAATCCAAATCCACCATCGGTGGTTGAATTCGCCACTCGTACTCTCCAAGTGGAAGGAAGGACGGTGAAAGCTCAGATATGGGACACGGCTGGGCAAGAACGATACAGAGCCATCACCAGCGCCTACTACAGAGGTGCGCTTGGTGCGCTCTTGGTCTACGACGTAACCAAACCAACAACGTTTGAGAACGTTAGCCGGTGGTTGAAAGAGCTCAGAGACCATGCGGATTCCAACAT…	646	1	AT1G09630.1	ATRAB11C (ARABIDOPSIS RAB GTPASE HOMOLOG A2A); GTP binding	Encodes a putative GTP-binding protein.	Identical to Ras-related protein Rab11C (RAB11C) [Arabidopsis Thaliana] (GB:O04486); similar to AtRABA2b (Arabidopsis Rab GTPase homolog A2b), GTP binding [Arabidopsis thaliana] (TAIR:AT1G07410.1); similar to unnamed protein product [Vitis vinifera] (GB:C	97.83	46	1	0	46	183	1	46	7e-95	94
MLN2.Contig_1315	GGCTGGAAATTAACAAATTCCCGTCTGTACAGAGAGAGAGAAGAAAGAGATTCTCTACAATTCTCGTCTTCATCGTGATCTTAGATCTTAGGGGTTTTTCGATTTCTTCAGCTCCAATGTCTTACGCTTATCTCTTCAAGTATATCATCATCGGCGATACTGGAGTGGGGAAATCATGCCTTCTGCTTCAGTTCACGGACAAGAGGTTTCAGCCGGTGCATGATCTCACCATCGGTGTTGAGTTTGGGGCTAGGATGATCACCATCGACAACAAGCCCCTCAAACTCCAGATCTGGGATACCGCTGGTCAAGAATCATTTAGGTCTATTACAAGATCCTACTATAGAGGTGCTGCAGGAGCTTTGCTTGTCTACGATATCACTAGGAGGGAGACATTTA…	607	1	AT4G17170.1	AT-RAB2 (Arabidopsis Rab GTPase homolog B1c); GTP binding	member of RAB gene family	similar to ATGB2/ATRAB2C/ATRABB1B (GTP-BINDING 2), GTP binding [Arabidopsis thaliana] (TAIR:AT4G35860.1); similar to RAB2A [Lotus japonicus] (GB:CAA98165.1); similar to unknown [Populus trichocarpa] (GB:ABK95459.1); contains InterPro domain Ras GTPase; (I	95.09	163	8	0	117	605	1	163	1e-86	315
MLN2.Contig_1316	CGACCTTGCACTGAAGGTTGTTGCAGCTAACATGGTAAGGACGGACAATTCGCTCACTGGCACTCATCTTCTATGCGCGGTTGGAAGACATCAAGAAGCTTGTTCACAGCTACAAGATTCTGGGCGATGGACAGATGCTGCTACCTTGGCTGCCACACATTTAGAAGGATCGGATTATGCCAGGGTATTGCAGAGGTGGGCTGATCATGTTCTCCACGCGGAGCACAATGTGTGGAGGGCACTTATCTTATATGTGGCCGCTGGTTCCCTGCAAGAGGCGCTTGCAGCTCTCAAGGAGGTGCAACAGCCGGACACAGTAGCCATGTTTGTGCTGGCCTGTAACGAGATCCATTCAGAAATCGTAAACGAGCTATCAAGCCAAGACGAAGAGTCTACTGG…	585	1	no significant hit
MLN2.Contig_1317	TTTTAAGTGTCTATTTAGTTCCCTCTCCAACATCGGTGACAATCGTTTTGCATCGTCTGGTTGGTTTTTGACTCTGGTGTCATCACTTTATACTCCAAGGTGAAGTCGGCTTTTCCGATTGATTCCAAATCAATGGGATGTCTCTGTTTTTAAGTCTTGGTGGTTTGGTGTTGCGGATGAGATCTCGACTTCGGTCGAGCGAAGCTCTCTGTTGTAAGGTGGTTCCGATGTGTGTGAAGACCTTCTCTGGAATTATGGTTGTGATATGGATGAGATCTCGATTAGGGACGATTGACGTTCTTCGATCGATGGATCTGATGCAAAGAAGGTGTGGGCTTCACAGCTGGTGGTTTCTTTGGGTGTGGTACTGTTCCCGGTTAGGTTCCGGTGGGTTGCCGT…	427	1	AT1G56560.1	beta-fructofuranosidase, putative / invertase, putative / saccharase, putative / beta-fructosidase, putative		similar to beta-fructofuranosidase, putative / invertase, putative / saccharase, putative / beta-fructosidase, putative [Arabidopsis thaliana] (TAIR:AT5G22510.1); similar to beta-fructofuranosidase, putative / invertase, putative / saccharase, putative /	42.86	35	19	1	38	139	426	460	4.6	26.9
MLN2.Contig_1318	GGAGACGTTTTGTGTCTTGATTGTTGCCAAACGCTTCCAAAGTGCAGGTTCTGCAACAAACCCTACTGCACAGGTCACAGCAGCCTGCGACAAGATAATACAACGACGGACGCGGCTATGTTTGCATGCCAATCTTGTGACTACAGGACAGGAGCAAACGCAAGCGATCCTATCGTTTTAGACTAAAGCCAAACTTGTTACCAAAGCCAATAAGAAGATTTGGACTTTCATATCTAAAGACATTTGTTGTTCTCTGCATCTTTGTTTATGTTCTTTATGAAAACCTTGGATTATGTAAAATCCAAAAATATTCATTGTGTAATAAAAAAAAATT	334	1	AT2G01620.1	MEE11 (maternal effect embryo arrest 11)		similar to F-box family protein [Arabidopsis thaliana] (TAIR:AT3G26000.1); similar to unnamed protein product [Vitis vinifera] (GB:CAO42341.1); contains domain SSF52047 (SSF52047); contains domain PTHR23125 (PTHR23125); contains domain G3DSA:3.80.10.10 (G	61.82	55	18	1	4	159	230	284	4e-15	76.3
MLN2.Contig_1319	GGTACGCAATCTGAAGTTCATTTCGTCTCTGCGCCGCCGACAAACAGATTCTCCGAGAAACCTAACCCGGCGGAGGAAACCATGCGTCGTCACTCAGCAATCGCTCTCCGATGCCTATTCACCAGAAACTCTCCACGACTCCCTCTTAATCGAAGCATTACCTCTTCTCCAGCTGCCGTAAACTCTACACCTCCTTCGCCGTCTCCTTATTCGACATCCAATCTCATCAAAGCATCATTCAGCTCAATGATCCAGAGGAAATTCAGCACCGGCGGCTCGCCGCCAGATGTGAACAAGGTGGTGGACGAGATCAATCTGAAGTTCGCAGAGGCGCGCGAGGAGATAGAAATGGCGATGGATGCGAAGGAGACGGTTTACTTCAACGAGGAGGCGGAGTGC…	596	1	AT1G71730.1			similar to unknown [Brassica rapa] (GB:ABL97948.1)	64.24	165	35	3	82	504	1	165	6e-34	140
MLN2.Contig_132	CTCATTATGGAGCTGATTAACAATGTCGCTAAAGCTCATGGTGGTTTCTCCGTGTTTGCTGGTGTGGGAGAAAGAACACGTGAAGGCAATGACTTGTACAGAGAAATGATTGAGAGTGGTGTCATCAAGCTAGGCGAGAAGCAGTCTGAGAGCAAATGTGCGCTTGTGTATGGACAAATGAACGAGCCCCCGGGTGCTCGTGCCCGTGTTGGRCTTACTGGTTTGACCGTTGCTGAGTACTTCCGTGATGCYGAAGGCCAAGATGTGTTGCTTTTCATTGAYAACATTTTCCGTTTCACTCAGGCTAACTCTGAAGTGTCTGCTTTGCTTGGTCGTATCCCATCTGCTGTGGGTTACCAGCCAACTCTGGCTTCCGATCTYGGTGCTCTYCAAGAGCGW…	1025	6	AT5G08690.1	ATP synthase beta chain 2, mitochondrial		Identical to ATP synthase subunit beta-2, mitochondrial precursor [Arabidopsis Thaliana] (GB:P83484;GB:Q8RY05;GB:Q8VX26;GB:Q9C5A8;GB:Q9C5B0); similar to ATP synthase beta chain 1, mitochondrial [Arabidopsis thaliana] (TAIR:AT5G08670.1); similar to ATP sy	99.67	305	1	0	1	915	240	544	1e-170	595
MLN2.Contig_1320	AGAGGTGAAATTCTTGGATTTATGAAAGACGAACAACTGCGAAAGCATTTGCCAAGGATGTTTTCATTAATCAAGAACGAAAGTTGGGGGCATGTCTGTGATCATGAAACGAAGAGGCAGGCCACCGGGTCGTAGAGCTGCCGGGAGACAGAGGAAGCCCCTGTCAGTCTCCTCCACCGCCTCTGTGTTTCCTTACGTCGCTAACGGCGCTAGACGCCGTGGAAGGCCAAGGAGAGTTGACTCTGGTGGCGTCCCCGTTGCTGCTCCAGCTGGTGGAGAAGCTGTAGCGGCTGCGCCAGGGATAAAGCGTGGACGAGGAAGACCACCTAAGATCGGTGGTGTTAAGAATAGGCTCATCACGAAGCCTAAGCGTGGACGAGGACGTCCCGTTGGTAGACC…	574	1	AT3G18035.1	HON4; DNA binding	A linker histone like protein	similar to HON5 (HIGH MOBILITY GROUP FAMILY A 5), DNA binding [Arabidopsis thaliana] (TAIR:AT1G48620.1); similar to DNA-binding protein (GB:AAA50196.1); contains InterPro domain Winged helix repressor DNA-binding (InterPro:IPR011991); contains InterPro do	49.02	51	26	2	422	574	368	415	7e-05	43.9
MLN2.Contig_1321	ATGGAAAATCAGAATCTTGGCAAACTTGCAGAGTGTGCACAGTACCAAGCTCTTCTCCAGAAGAACTTAATGTACCTCGCTGCTATTGCTGATGCTCAACCTCCTCCATCTACAGCTGGAGCTACACCACCACCAGCTATGGCTTCCCAGATGGGGGCACCGCATCCTGGGATGCAACCGCCGAGCTACTTTATGCAACACCCACAAGCTTCAGGGATGGCTCAACAAGCACCACCCGCTGGTATCTTCCCTCCGAGAGGTCCTTTGCAGTTTGGTAGCCCACACCAGCTTCAGGATCCGCAACAGCAGCATATGCATCAACAGCTATGCAAGGACACATGGGGATGCGACCAATGGGTATCAACAGCAACAATGGGATGCAGCATCAGATGCAACAGC…	614	1	no significant hit
MLN2.Contig_1322	CACATCAGTTTCTTCAACCCTCCCCGCAGCGTCAGAAATAATGGCTGCACTAACTGCAATTTCAAACAACAAAGAACTAGGCAGCGGCATGATCGACCAAGATCTGCTTATGAAAATCTTGAGCAACCCTAAGCTGGTGGAGAATCTTGTTGCAAACAATGGTGGCGCAGGTTCAGTCTCCTCCAACGCAAGTAGCCCCTACCTATCTGAAGCAAATGGAGTAGTAACCACAACACCTGCCAGCTCAAATGGACAATATTACCCTCAGCCAACGGTAACTCATAATACTCCTTCCATGACCTATCCTCCTCCAGCTCCTTCAGATCATCCCAACTATGGAGCACCACCAGCCAGAGATGCTAGTTATTACAAGAGCCTGATTCAGCAACATGGCGGGGA…	569	1	AT1G19860.1	zinc finger (CCCH-type) family protein		similar to zinc finger (CCCH-type) family protein [Arabidopsis thaliana] (TAIR:AT3G51180.1); similar to hypothetical protein [Prunus persica] (GB:AAO14624.2); contains InterPro domain Zinc finger, CCCH-type; (InterPro:IPR000571)	76.04	192	43	5	2	568	183	369	2e-63	238
MLN2.Contig_1323	GAAAAAGAACTTGAAGCTCATCGATGTCGATGTTCCGGTCATCGGTGGCCACGCTGGAATCACCATTCTGCCTCTTTTATCGAAGACCAAGCCTTCGGTCAGCTTCACTGATGAAGAGATCGAGAAACTCACTGTGAGGATTCAGAACGCTGGAACCGAGGTGGTGGATGCTAAGGCGGGTGCTGGATCGGCTACTTTGTCGATGGCGTATGCCGCAGCGAGATTTGTGGAGTCGTCTCTTCGTGCTCTTGACGGAGATGGAGATGTTTACGAGTGCTCTTTCGTGGACTCGACGCTGACTGATCTTCCTTTCTTTGCATCACGGATCAAGATTGGGAGGAACGGGGTTGAAGCTGTGATTGAGTCTGACCTCCAAGGGCTGACTGAGTATGAGCACAA…	543	1	AT3G47520.1	MDH (MALATE DEHYDROGENASE); malate dehydrogenase	Encodes a protein with NAD-dependent malate dehydrogenase activity, located in chloroplasts.	Identical to Malate dehydrogenase, chloroplast precursor [Arabidopsis Thaliana] (GB:Q9SN86;GB:O81844); similar to PMDH2 (PEROXISOMAL NAD-MALATE DEHYDROGENASE 2), malate dehydrogenase [Arabidopsis thaliana] (TAIR:AT5G09660.1); similar to PMDH2 (PEROXISOMA	93.63	157	10	0	2	472	242	398	3e-78	287
MLN2.Contig_1324	CATGCCTTTCAAAATCTGCTCAAAGGAGATGACTTTTATAGAATAAGACTCCCATCTAATGTTGTCACTCCACCTGGGAGAGAGTATGTGATTGCATCAGTGAGAGCTAGATGTCTTCCACGGGATGGTTTGGATGAGCATATCGCTATACACATGGATGGTGCCAACATTTTGGCAGTCAGTTACGGCTCTCCTGGAGCATGCCCGTATCCTCGACAGTTGAAACTTCCAGGAAAATGGACATTTAACTCCCACACCATCTTGAAGAGTAGTGAGCAGGCACCAAGAACTCCGATATTCACGGAGGAGATTCTTGACAGTAGCGAGAATATGGAAGGTGAAGCAGAAGCGCCAGTAGAGAGATCATTTTGGGCAAAATATTGGATGTACTTGATACCA…	572	1	AT1G65270.1			similar to hypothetical protein [Vitis vinifera] (GB:CAN71035.1)	89.33	150	16	1	4	453	126	274	5e-75	276
MLN2.Contig_1325	GATTCAAGCAACAGTACTCTCTCTCCTACCTCACTCCTCTCTCTCTCTCTTCCTCTCCCTGCAAAATCATGGCGACGGAGACCGAGCTTGAACTTCAACAGTCCGGCCAGATCGCGATGGTGAAGAACAACTACATGAAACCAGATCCGCAAGCTCCGCCCAAGCGCGGCCGCGGCCGTCCTCCGAAGGCGAAGCCTCAGGGAGAGTCAAGCCACGTGGCGGTCCCGGCTCCTGCTCCTTCCGTTTCCTCGCCGAGGCCTAGAGGTCGTCCTCCTAAGGCGAAGGATCCTTCCTCGGAGGTGGAGACGAAGGTTGCGGCACCGAGTGGCTCCGGGAGGCCACGTGGACGACCGCCGAAGAAGCAGAAGACGGAATCCGAGGCGGTTAAAGCCGACGTTG…	571	1	AT1G14900.1	HMGA (HIGH MOBILITY GROUP A); DNA binding	Encodes a protein belonging to the subgroup of HMGA (high mobility group A) proteins that interact with A/T-rich stretches of DNA.	similar to HON5 (HIGH MOBILITY GROUP FAMILY A 5), DNA binding [Arabidopsis thaliana] (TAIR:AT1G48620.1); similar to high mobility group protein I/Y [Brassica napus] (GB:AAF22135.1); contains InterPro domain Winged helix repressor DNA-binding (InterPro:IPR	63.16	19	7	0	90	146	73	91	0.09	33.5
MLN2.Contig_1326	GAACGAAACAAATTCAATTCATTTCGCACTTCTTTTCTAAACCTCTCTTTATCATCATCTTACAACTTCACCTACCCAACCTTCTCTTTCTCACGCTTCCTCTGAAAACAGATGACACAAATGGTTTCTGCATCGTCCAAGACGAAAGCTTTAGACCCCCCTCTTCACGCCTTAGGTTTCGAGATCGATGAACTATCGCCCACACGTGTCACTGGTCGTCTTACCGTTTCTCTAATCTGCTGCCAGCCTTTCAAGGTGTTAAACGGTGGTGTGTCTGCTTTGATCGCCGAGTCTTTAGCAAGTATGGAGCTCACATGGCTTCCGGTTTCAAAAGGGTCGCTGGAATTCAACTCTCCATAAACCACGTAAAGAGTGCCGATCTCGGAGACCTTGTCTTCG…	580	1	AT1G48320.1	thioesterase family protein		similar to thioesterase family protein [Arabidopsis thaliana] (TAIR:AT5G48950.1); similar to unnamed protein product [Vitis vinifera] (GB:CAO70944.1); contains InterPro domain Phenylacetic acid degradation-related protein (InterPro:IPR003736); contains In	79.35	92	18	1	306	578	63	154	1e-62	151
MLN2.Contig_1327	TGCTCACTACAGTTCTCTCTGTTCTCTATTCCGCACTCAGAGCTGGCTCTTCCACCACATTCCTCTCACCACCATCATCTCCCAGAGCAGGTACTTCCTCAAACTCCTCAATACGCTTAGACATTAGTTTCTTCTGTTTTGCTTGAAATGTTGTGTCCAGGTGGGAAGGAGGCATTGTTAGAAGACCCTGAGGATGGGAAGAAGAACGGTGAAGCAGAGGCACGGCCTGTGAGTTACTCATACTCTTTCTTCCATATAATCTTTGCGCTGGCGAGCATGTACGCGGCAATGCTTCTCTCGGGATGGACTGACTCGCCAGAGAGTGCGTCTCTGGATCGACGTGGGATGGACCTCGGTTTGGGTCAAGATTTGTACCGGTTGGGCCACGGCTGCACTCTA…	566	1	AT3G06170.1	TMS membrane family protein / tumour differentially expressed (TDE) family protein		similar to TMS membrane family protein / tumour differentially expressed (TDE) family protein [Arabidopsis thaliana] (TAIR:AT1G16180.1); similar to unnamed protein product [Vitis vinifera] (GB:CAO71089.1); contains InterPro domain TMS membrane protein/tum	96.67	30	1	0	3	92	285	314	7e-42	43.9
MLN2.Contig_1328	AACTAAGCGACGAATCTGGTCAAATGGACCAGTCTGATTTCGCGAGGTTAGCCGAATCCATGGCTGAGTTCGTCGAGCAGCGAACCAAGCTCACCGTCGGTCCGATCCAACGTCCGCCGTTTCTCTCCAAGGCGCAGATCAGCGTCATCGTGGCGATGATCGTAATCGCGACTCCGTTTGTCATCAAACGGATTCTGAGAGGAGAGACTCTTCTCCATGACCATAGGCTTTGGTTATCAGGCGCTATCTTCATCTACTTCTTCAGCGTCGCCGGAACGATGCACAACATTATCAGGAAGATGCCTATGTTTCTTCAGGATCGTAACGATCCGAACAAGCTTGTTTTCTTCTACCAAGGATCTGGGATCAGCTCGGAGCTGAGGGGTTCGCTGTGGGGTT…	512	1	AT1G61790.1	OST3/OST6 family protein		similar to OST3/OST6 family protein [Arabidopsis thaliana] (TAIR:AT1G11560.1); similar to unknown [Brassica rapa] (GB:ABB97041.1); contains InterPro domain OST3/OST6 (InterPro:IPR006844)	84.38	128	20	0	3	386	150	277	1e-61	221
MLN2.Contig_1329	GAGCCCATTCATAACTATACGTCACCATATAAAATATAGTTACATAGAAGAAATAATTATTGGGCGGTTGTTTTCATGAAAAAATCTCATGTATAACTTTGCTTCACAAATAACTTTACGAGAGTAAATATGAATTTAGAGTGAATATTATTACCTTTTATACAAATAAAATAATAACTACAAATTATTCTTTTTTCGCAGACCAACAATCCCACCGAAAAACTAAGTGGGAATTGTAAAAGAGACCATCTATACCCATCTTACCCTTTCTAACGTATTTCTTGTGTTCTTCTTCCTACTGAACAATATGCCATCCCG	318	1	no significant hit
MLN2.Contig_133	GAGATCGGAATTTTCGAGAAAGCGCGAGAGGGAGAGAGACGAAACGATGTCGTATCTTCTACCGCATCTTCACTCCGGCTGGGCTGTAGATCAGGCGATTCTAGCCGAGGAAGAGCGTCTCGTCGTCATACGTTTCGGCCATGATTGGGATGAGACTTGTATGCAGATGGATGAGGTGCTTGCGTCTGTTGCTGAGACGATAAAGAACTTTGCGGTGATATATCTGGTGGACATCACCGAGGTTCCAGACTTCAACACCATGTACGAGCTCTACGATCCTTCCACGGTGATGTTCTTCTTTAGGAACAAGCACATTATGATCGATCTTGGGACTGGWAACAACAACAAGATCAATTGGGCTATGAAGGACAAGCAGGAGTTTATYGATATCATTGARAC…	656	2	AT5G08290.1	YLS8 (yellow-leaf-specific gene 8); catalytic	Encodes Dim1 homolog.	similar to catalytic [Arabidopsis thaliana] (TAIR:AT3G24730.1); similar to unknown [Populus trichocarpa] (GB:ABK94150.1); contains InterPro domain Thioredoxin-like fold (InterPro:IPR012336); contains InterPro domain Thioredoxin fold (InterPro:IPR012335);	97.89	142	3	0	47	472	1	142	4e-79	290
MLN2.Contig_1330	TGGTTTAGTCACATGAATTGGATGTTTGATACTAATACTATCACGCACAGGGTTGGAGAGCCTAATAATGTTGGGGACTTGGAGAAGCAGCCGTTCTATCAGTTCCTTAAAAACACCTACATTTGGCATCCGGTGGCTCTAGCGGCTGCTCTATACGCAATGGGTGGCTTCCCCTTCATCGTTTGGGGAATGGGTGTAAGAATAGTATGGGTATATCATATAACTTGGCTAGTGAACTCAGCTTGTCACGTTTGGGGAAACCAAGCTTGGAACACTGGAGACTTGTCTAAAAACAACTGGTGGGTAGCAGCTCTAGCTTTTGGAGAAGGATGGCACAACAATCACCATGCTTTCGAGTTCTCTGCTCGACATGGCCTTGAATGGTGGCAATTTGATATG…	660	1	AT3G15850.1	FAD5 (FATTY ACID DESATURASE 5); oxidoreductase	Chloroplastic enzyme responsible for the synthesis of 16:1 fatty acids from galactolipids and sulpholipids. Uses ferredoxin as electron donor.	Identical to Palmitoyl-monogalactosyldiacylglycerol delta-7 desaturase, chloroplast precursor (ADS3) [Arabidopsis Thaliana] (GB:Q949X0;GB:Q8LCQ8;GB:Q9LVZ4); similar to ADS1 (DELTA 9 DESATURASE 1), oxidoreductase [Arabidopsis thaliana] (TAIR:AT1G06080.1);	92.17	166	13	0	1	498	206	371	2e-95	345
MLN2.Contig_1331	CTAGAACGCTAGTACCACGAATGCGTGTTGTGAAAGGTTCAGGAAAATCAGTCAATTATCTAACTCCTCCAAGGATATTGCTTGCCATTGTCACGTCGTGGCTCAGGAGAAGCAGGTGGTTCGATGACCAAGGACGGGCGTTATATGCAGCGGAAGCAGACAGACTAAGGAACTGGGCAGAGAACAGGACGAGGTTCTCCTTGACAGACGCGATGGAGATGTATACAGAGAATACTTGGGTCTCTGTTTTCTCTCTTTCTGTTGTTTGTGCCTTTATCATCTTATCAAGCACCACCCCTAGCTCTTTCCCAGGCACATGACCACACATTTGTTTTAACAAAACCAATCCTTTATGGGATGTGTTTTAAAAATGTAAACGTACATGTTATGTATAAAACC…	437	1	AT4G13250.1	short-chain dehydrogenase/reductase (SDR) family protein		similar to short-chain dehydrogenase/reductase (SDR) family protein [Arabidopsis thaliana] (TAIR:AT5G04900.1); similar to Os01g0227100 [Oryza sativa (japonica cultivar-group)] (GB:NP_001042468.1); similar to unnamed protein product [Vitis vinifera] (GB:CA	96.81	94	3	0	3	284	392	485	4e-48	186
MLN2.Contig_1332	TAGTACGAGTTTTGGTGTAATCACTGTTTACTCAAAACATATATTGGACGATCTTTTTTGTTATTATATAGATAAAGAAATCAATTGTGTGGTACATTTTGCAATTGATGAAAACCAAATTGGTACCACATCTTTAGCTTTATCTTCATTTAAAAAAATATATATATATATGTGGATGTAACTATATTCCGACAACCTGGACCGTAGATTCTGGAGTTTGTCTATTAAGAGCATCTGCATTAGTGAACTCTATAGGGAGTTCACACAGTTTTCG	274	1	AT5G12220.1	las1-like family protein		similar to unnamed protein product [Vitis vinifera] (GB:CAO69570.1); contains InterPro domain Las1-like (InterPro:IPR007174)	43.48	23	13	0	26	94	100	122	1.7	27.7
MLN2.Contig_1333	GGTACGCGGCCCGACTACCCCAATCTCCTGGTGGAACCCTAATCATCCTCTACGCTCGCCTTGGTGATCTCCGCTCTCCTTCGATCGGCGCAGCTGCGATCTATCTCCTGTAACAGTTCTTCGATAATCAATGGACTTAAATCATCTTTAATCACCACTGCGAAGCTCCCTCCTGCGCCGCTCATCTGCTATATAAAGATCTCACTGCCAACTATCATACAAGCGACTGTGTACAGAGGGTTTAATGTATTCCATAAGCGATTTTGATGTGGCTCAGAGCAATCTAAAGTCTCTCCTCTATCAATTTGACTGAATCGTGTCTCCACCGTCAAAGTGCGTCTCATCAGATTCTGGGAGGCTCTCCCTCTCTCTTTGTTTTTTTTAGGATGGTTAAGATAG…	493	1	no significant hit
MLN2.Contig_1334	TCCGACCATGCCCTATTTCCGACCAGACTACGGACCAGAAGATGGGTCTTCGCCACCAATAACGTATCTGCATCTACACCAATGTGAACAATTCTCGATCGGGATTTTTTGTTTGCCGCCTTCAGGTGTCATTCCTCTTCATAACCATCCAGGGATGACAGTTTTTAGCAAGCTTCTCTTTGGTACAATGCACATCAAGTCCTATGATTGGGTGGCTGATGCTCCAATGAGAGATCCGAAAACCAGGCTGGCAAAACTGAAGATGAACTCAGCGTTAACCGCACCATGCAACGCCTCCATTTTGTACCCGGAAGATGGTGGGAACATGCATAGGTTCACAGCCATAACAGCGTGCGCGGTTCTAGACGTGCTTGGCCCTCCTTATTGTAATCCTGAAGG…	592	1	AT5G15120.1			similar to unknown protein [Arabidopsis thaliana] (TAIR:AT5G39890.1); similar to unnamed protein product [Vitis vinifera] (GB:CAO14912.1); contains InterPro domain Protein of unknown function DUF1637 (InterPro:IPR012864)	87.5	192	23	1	2	574	102	293	1e-98	355
MLN2.Contig_1335	GTGGCAAGGGTTAAAAGGTGGGACAAAGAAGCAGAAGTATGACAAGATTAGTGAAAAGAAGATGCTTACTCCTGTAGAGATTCTGTGCAAGTCACATCCATCAGAGTTCACCTCCTATTTCCATTACTGTCGATCACTGAGATTTGAGGACAAACCAGATTATTCATATCTGAGAAGACTTTTCAGAGACCTTTTCATTCGTGAAGGTTACCAGCTGGACTACGTGTTTGATTGGACAACCTTGAAATATCCTCAGACTGGCTCTACTTCGAGACCAAGGCTGACTCCAAGACCAGCCTTGGACCCGGACCCTCCAGGACCACCTGCAGAAAAATCTGAAAAAACTACAGTGGGACAAGACCTCAGAGGAAGATTTTCAGGGGCAATAGAGGCATTCAC…	558	1	AT4G14340.1	CKI1 (CASEIN KINASE I); casein kinase I/ kinase	Phosphorylates serine or threonine residues that are near and C-terminal to acidic side chains on a variety of target proteins	similar to CKL10 (Casein Kinase I-like 10), casein kinase I/ kinase [Arabidopsis thaliana] (TAIR:AT3G23340.1); similar to CKL8 (Casein Kinase I-like 8), casein kinase I/ kinase [Arabidopsis thaliana] (TAIR:AT5G43320.1); similar to unnamed protein product	80.85	188	33	2	2	556	219	404	2e-66	248
MLN2.Contig_1336	GACAGACTCGCAGAACATTCGATTCTCTTTCAATCTCTAAAAAGTCTAATCTCTAAAAAAAAAGTCATCGATAATGGCTCCTAAGGCGGCAGAGAAGAAACCGGCGGAGAAGAAGCCAGCAGAGAAGGCCCCGGCGGAGAAGCGACCAAAGGCGGAGAAGAAGATCTCCGAAGGAAGGCGGTAGCGACAAGAAGAAGAAGAAGGCGAAGAAGAGCGTGGAGACGTACAAGATCTACATCTTCAAGGTCCTGAAGCAGGTTCATCCCGACATCGGAATCTCCGGGAAGGCGATGGGGATCATGAACAGTTTCATCAACGACATATTCGAGAAACTCGCCCAGGAATCGTCGAAGCTCGCGAGGTACAACAAGAAGCCGACGATTACGTCACGGGAGATCC…	583	1	AT3G53650.1	histone H2B, putative		Identical to Putative histone H2B.8 [Arabidopsis Thaliana] (GB:Q9LFF6); similar to histone H2B, putative [Arabidopsis thaliana] (TAIR:AT5G02570.1); similar to unknown [Populus trichocarpa x Populus deltoides] (GB:ABK96616.1); similar to unknown [Populus	93.59	78	5	0	171	404	33	110	4e-37	132
MLN2.Contig_1337	GACTTTCTTCTTCTCTTTCATTTATTCCTTTCTTCCTTCATTAGATCCTTAGTATCTCTGCTTTACTCATTTTGAGTCATCGGATCATGGAGTTTTTCCTGGAGATGCTTCTCACGGCGGTTGCGGCTGTTCTGTTTTCTTTCCTCGTGGCCAAGCTCGTGTCTGTGTCTATGGTTGGGAACAGCGGTGGAGTAGTAAACGATCAGGCGGAGGAAACCGAGATCGGCGTTGTTGCCGTGGAGGAGGAGCTTTGTTCTGGTTTGAAAGTGGATGCTCCGGTGGTGCAGAGCGAGAGGAGACTCGGAGCTGTTGTTGTTGATGAGAATGTGGAGCGTGTTGATCGGTTTGGAAGCGAAGCTGATCGAGTTGTTGATGAGGTCAAGGAAGGGACTAAAGGGG…	588	1	AT4G24230.6	ACBP3 (ACYL-COA-BINDING DOMAIN 3)	acyl-CoA-binding protein ACBP3. Localized extracellularly in transiently expressed tobacco BY-2 cells and onion epidermal cells. Binds arachidonyl-CoA with high affinity.	similar to ACBP1 (ACYL-COA BINDING PROTEIN) [Arabidopsis thaliana] (TAIR:AT5G53470.1); similar to unnamed protein product [Vitis vinifera] (GB:CAO61453.1); contains InterPro domain FERM/acyl-CoA-binding protein, 3-helical bundle; (InterPro:IPR014352); con	44.7	132	69	7	201	584	37	157	4e-11	64.7
MLN2.Contig_1338	GAAATCAGTAGAAGAAAAAAAAAAGTTCTCAGATTTCCAAAAAGAAAAAGCTTCGAAGAAGGAAAATGGCGGATCAGCTGACCGATGACCAGATCTCAGAGTTCAAGGAAGCCTTCAGCCTCTTCGACAAGGATGGCGATGGTTGCATCACCACCAAGGAGCTCGGAACCGTGATGAGGTCTCTGGGGCAAAACCCGACAGAAGCTGAGCTCCAGGACATGATCAACGAAGTTGACGCTGACGGGAACGGGACCATCGACTTCCCTGAGTTCCTGAACCTGATGGCGAGGAAGATGAAGGACACTGACTCGGAGGAAGAGCTCAAGGAAGCCTTCAGGGTGTTTGATAAGGACCAGAACGGTTTCATCTCCGCGGCTGAGCTTCGACATGTGATGACTA…	583	1	AT3G43810.1	CAM7 (CALMODULIN 7); calcium ion binding	EF hand domain protein encodes a calmodulin. Can functionally complement a yeast CaM mutant.	Identical to Calmodulin-7 (CAM7) [Arabidopsis Thaliana] (GB:P59220); similar to CAM3 (CALMODULIN 3), calcium ion binding [Arabidopsis thaliana] (TAIR:AT3G56800.1); similar to CAM5 (CALMODULIN 5), calcium ion binding [Arabidopsis thaliana] (TAIR:AT2G27030	99.33	149	1	0	66	512	1	149	5e-81	296
MLN2.Contig_1339	GCTCAAGCAGAACACTATCTGATTCCAAAACGGCGAATCAAGCTCCCTCAATGCACGGTCTTCCTGATTTTGCTGAAGTTTATAACTTCATTGGGAGTGTCTTCGATCCTGACAGCAAAGGCCGCATGAAAAAACTCAAGGAAATGGATCCTATTAATTTCGAAACTGTTCTGCTATTGATGAGAAACCTCGCAGTGAACTTGTCAAACCCTGACTTCGAACCTGCTGGGAAGGTCCTGAACAATTAAGCTCTTAGCAGGGTAGTGCGGGACCCCTGGTCAAGAACCAAACAAGTGATATATCTTCTTGGGGAACTTCTTGCTCACAACAACTGTCTATCAGCTATCAAATGCTGCTTGCGGTTGTTGTCTGAGGAGAAAATAATTTAACCTTGGAATA…	594	1	AT5G02840.3	LCL1 (LHY/CCA1-LIKE 1); DNA binding / transcription factor		similar to myb family transcription factor [Arabidopsis thaliana] (TAIR:AT3G09600.1); similar to unnamed protein product [Vitis vinifera] (GB:CAO18046.1); contains InterPro domain SANT, DNA-binding; (InterPro:IPR001005); contains InterPro domain Homeodoma	89.16	83	6	1	3	242	200	282	2e-35	145
MLN2.Contig_134	GAAACGACATTTCGAGAAAAATMTCAGTGATTAGCAAAGATGTCTTCGGCTCGTTATGCGATCGCACGGCTAGGTCTGGCTCGATCCTTAGGGGAGAGTCAGGTTGGTGCATCTCGCTCTGTTGGATCGGTTCGTTGCTTCAGCGACGACAAAGGTCGTGTGCTTAGCGATGAGGAACGTGCCAAAGAGACCATTTACATCCAGAAAATGGAGAAGGAGATACTTGAGAGGAAGAAGAAACTCGAGCAACAGAAGACAGATAGTGAGAAAGGAAGTGCAGGAAAGAAGCCAGAGGATAAGAAGCCATGAGTTCATCATCGGCGTTAACATGTGGTCACAAGGCAAGCAAAAAAAATGAAGAATAAGCCTGTGACAGTTTGACCTTTGTCCTCTTGGTTT…	538	2	AT5G04750.1	F1F0-ATPase inhibitor protein, putative			71.28	94	22	1	40	306	1	94	1e-19	92.8
MLN2.Contig_1340	ACATGATGAAATTGATGATGATTGATTACAAGGTGGATACAATCAACGACGATTTGCAGATGTTCTATGTCACTTTCCATGGCCCCACTGACAGTCTATATGAGGGAGGTGTATGGAAGATCAAAGTCGAACTTCCTGAAGCTTACCCTTACAAATTTCCTTCTGTTGGTTTCGTTAACAAGATCTATCACCCCAATGTTGATGAATCTTCGGGCGCAGTTTGCTTAGATGTAATAAACCAGACATGGAGCCCAATGTTTGATCTTATCAACGTCTTTGAATCATTCCTTCCTCAACTGCTTCTATATCCAAACCCATCTGATCCATTCAACGGAGAAGCTGCGTCTCTCTTGATGCGAGACCGTGCAGCCTATGAGAAGAAAGTCAAAGCGTATTGCA…	613	1	AT2G46030.1	UBC6 (UBIQUITIN-CONJUGATING ENZYME 6); ubiquitin-protein ligase	Ubiquitin conjugating enzyme E2	Identical to Ubiquitin-conjugating enzyme E2-21 kDa 3 (UBC6) [Arabidopsis Thaliana] (GB:P42750;GB:O49739;GB:O82365); similar to UBC4 (UBIQUITIN CONJUGATING ENZYME 4), ubiquitin-protein ligase [Arabidopsis thaliana] (TAIR:AT5G41340.1); similar to ubiquiti	83.71	178	29	1	3	536	12	183	1e-68	255
MLN2.Contig_1341	CATCGATTCCAGCGTCTGGCAACCCTTCGTTGGTCCACGTCGCGATTACTCTCGATTTCGAGTACCTCCGTGGCTCAATCGCAGCCGTTAATTCGATCCTCCAGCACTCGTCGTGCCCCGAGAGCGTCTTCTTCCACTTCCTCGTCTCCGAGCCCGACCTAGAGTCCTTGGTACGCTCCACCTTCCCCGAATCGAAATTCAAGGTCTACTACTTCGATCCGGAGACCGTACGGACGCTGATCTCCACCTCCGTGAGGCGATTGAGAAGTGGATGGAGGTTCAGAAGAGCGATAGGATATACGAGCTGGGGTCTTTGCCTCCGTTCTTGCTCGTCTTCGCCGGGGATGTTGCGCCGATTGAGCATAGGTGGAATCAGCATGGTCTCGGTGGAGATAACGT…	601	1	AT3G62660.1	GATL7 (Galacturonosyltransferase-like 7); polygalacturonate 4-alpha-galacturonosyltransferase/ transferase, transferring glycosyl groups / transferase, transferring hexosyl groups	Encodes a protein with putative galacturonosyltransferase activity.	similar to GATL5, transferase, transferring glycosyl groups / transferase, transferring hexosyl groups [Arabidopsis thaliana] (TAIR:AT1G02720.2); similar to GATL5, polygalacturonate 4-alpha-galacturonosyltransferase/ transferase, transferring glycosyl gro	93.75	96	6	0	254	541	263	358	9e-54	206
MLN2.Contig_1342	GTGTCGCCGGAATCAGGAGGATTGAGAATCCGTCTTTCTCAGTCGCCGTCCTCGATTCAACCTAGGGTTCCTCGATTACGAAGAGGCGTCGTCGTCGTCTGCGAAGCTCAGGAAACTACGACTGACTTAGTTTCAATAGTGAACGACTCGACGTGGGATTCTCTAGTTCTCAAGGCAGACGGCCCTGTACTTGTCGACTTCTGGGCACCATGGTGTGGACCTTGCAAAATGATTGACCCGCTCGTGAATGAGCTAGCACAACAGTACACCGGGAAGGTTAAGTTCTACAAACTAAACACCGACGACTCTCCTTCAACCCCAAGCCAGTACAATGTTAGAAGCATCCCAACGATCATGATCTTTGTCGATGGCGAGAAGAAGGACGCAATCATAGGTGCA…	606	1	AT4G03520.1	ATHM2 (Arabidopsis thioredoxin M-type 2); thiol-disulfide exchange intermediate	chloroplast localized thioredoxin, similar to prokaryotic types.	Identical to Thioredoxin M-type 2, chloroplast precursor [Arabidopsis Thaliana] (GB:Q9SEU8;GB:Q9ZT79); similar to ATHM1 (Arabidopsis thioredoxin M-type 1), thiol-disulfide exchange intermediate [Arabidopsis thaliana] (TAIR:AT1G03680.1); similar to Thiore	74.5	149	36	2	1	441	38	185	7e-59	223
MLN2.Contig_1343	GAGGAGTGATCAAGCTCGTGAAGCCGAAGATCCAATCTGTGGATATCCAGGCCGCCGCAGGATGGGGTATCGCCGCCGCAGCCGGCGCCATCTGGGTCGTCCAACCTTTTGATTGGATTAAGAAGACATTCATTGATAAACCAGCACCTGAAGACAAGTGAGTGATCAAGATTCAAGAGAAAATGAGATTTTTTTTCTTCCAGTTTTCAAGTTTGTTATTACATCTTTGCGATGTAGCTGAATAAAATTTTGTTTCTTTTCTGGAAAACGTGTTGTTTCATGCCTTCAATGTAGACATCCTGTTTTCTCAAATGTTATAACACAAAGAAGGACGTTCCTAATCATCAGGAAATATTATCCATTTTGTTTTTAATCATATGCTGTTACTTCC	391	1	AT2G40765.1	unknown protein			78.85	52	11	0	3	158	6	57	2e-08	54.3
MLN2.Contig_1344	GAACGCGAACATGCAGTACGCGAGGCGGTATAACCAAGGGTTCATGAACCGTCAGAAGGCGGGGAGAGGGACGCCTATGAGACCAGGTCCTATGGATGCTTACTTGTTTAGTCTTATAGATGAAGATGCTAAAAGCATTCAGCCGGGGAACTTTGAGAGGCATTGGGGGATTTTTTATATTGACGGGCAGCCTAAGTATCAGCTGAGTCTTGGTAACGGTAACGGTTTGGTTCCGGCGAAAGGTGTGCGTCATATGGCGAAGAAATGGTGTGTTCTCGCGGCTTCTGCTAATCTGCAAGATCCTCAGCTTGGACCGAGTGTGAGTTACGCTTGTGATCATGCTGATTGTACTAGTCTTGGGTATGGTTCTTCTTGTGGGAGCTTGAATCTAGCGCAGAA…	613	1	AT4G31140.1	glycosyl hydrolase family 17 protein		Identical to Putative glucan endo-1,3-beta-glucosidase 5 precursor [Arabidopsis Thaliana] (GB:Q9M088;GB:Q0WNN9); similar to glycosyl hydrolase family 17 protein [Arabidopsis thaliana] (TAIR:AT5G58090.1); similar to unnamed protein product [Vitis vinifera	82.93	205	34	1	2	613	277	481	6e-100	359
MLN2.Contig_1345	GATCAACAACTATCACACAAACACATAAACTCAAAAATCTTATTCTATTTGTTTCGTTTTATCATCAGAAAAACATAAACATGGTTGCTATTTCAGAGATCAAGTCGACGGTGGAGACTACGGCGGCGAACTGTCTGATGCTCTTATCAAGGGTCGGACAAGAAAACGTTGACGGTGGAAGCGCAAAACGCGTTTTCACATGTAAGACGTGTTTGAAGGAGTTTCATTCGTTTCAAGCGTTGGGAGGTCACCGTGCGAGCCACAAGAAGCCTAACAATGAGAATCTCTCTAGTTTGATGAAGGAGACGAAAGCTTCGTCTTCCCATCCTTGTCCGATATGTGGAGTGGAGTTTCCCATGGGACAAGCTCTAGGAGGACACATGAGGAGACACAGGAACG…	543	1	AT5G59820.1	RHL41 (RESPONSIVE TO HIGH LIGHT 41); nucleic acid binding / transcription factor/ zinc ion binding	Encodes a zinc finger protein involved in high light and cold acclimation. Overexpression of this putative transcription factor increases the expression level of 9 cold-responsive genes and represses the expression level of 15 cold-responsive genes, inclu	similar to zinc finger (C2H2 type) family protein [Arabidopsis thaliana] (TAIR:AT3G46080.1); similar to C2H2-type zinc finger protein [Brassica napus] (GB:ABB52061.1); contains InterPro domain Zinc finger, C2H2-like; (InterPro:IPR015880); contains InterPr	85.99	157	19	4	81	542	1	156	3e-69	257
MLN2.Contig_1346	GGAATCTGATTTTTGGGAATCAAAGTACTATAATGGGTTTGACGAATTTCATACTGACGGTGGCCGGAGTAGGCGCCGTTGTGATGCTATTGAAGGGCGACGTGAAGCAATCTGCCACCGTATTGAGGCGCAACGTCAAGCACATCCGCAACTGGCTCGAAGAGGAATCTTCCGCCGCCTCCAAGGCAGCGCAGTCAGCAAAACCAAAGTAATTGAAACCAAGGTTCCGGAGAAGGATGTTCCAAAAGACAAGAATTAGTTTGTGTGTGTGTGTAGTGCTTTTCTGTATACATACACGAAGGCTTTTTCTGTTTTGTGAAGAGTTGTGGATGTATGACTCCAGTTTCAACACTACTTAGCTGTGAATTTTTGTTTTGTTTGTCAGTCTCCATCTCTCAC…	514	1	AT5G14105.1			similar to hypothetical protein [Vitis vinifera] (GB:CAN83318.1)	91.11	45	4	0	33	167	1	45	5e-20	84
MLN2.Contig_1347	GGTTCATAAAAGACTCTTTGAAAAAGAGAGAAAGAGAGAAAATGGGAGGTGTATTATCATCTGTGTTAGGAGGTGGTGGTGGAGATGAAGCAGTCGCCGGGAATGAATCCGAGCAAAGTCGCGTCATGAAGTTTAGCTCATCGGCTCGGTGGCAGCTTCACTTCAACGAGATCAAAGAATCCTCGAAACTGCTGGTGGTTGACTTCTCAGCATCGTGGTGTGGACCTTGTAGGATGATCGAGCCTGCGTTCATCGCCATGTCTGCCAAGTTCACTGATGTTGAATTCGTCAAATTGGATGTCGATGAACTTCCCGATGTGGCTAAAGAGTTCAATGTGACGGGGATGCCAACTTTTGTGCTGGTGAAAAATGGTAAAGAGATTGAAAGGATCGTTGGAG…	562	1	AT5G39950.1	ATTRX2 (ARABIDOPSIS THIOREDOXIN H2); thiol-disulfide exchange intermediate	encodes a cytosolic thioredoxin that reduces disulfide bridges of target proteins by the reversible formation of a disulfide bridge between two neighboring Cys residues present in the active site. Thioredoxins have been found to regulate a variety of biol	Identical to Thioredoxin H-type 2 (TRX2) [Arabidopsis Thaliana] (GB:Q38879;GB:Q39240); similar to ATH8 (thioredoxin H-type 8), thiol-disulfide exchange intermediate [Arabidopsis thaliana] (TAIR:AT1G69880.1); similar to thioredoxin [Brassica juncea] (GB:A	84.17	120	19	0	84	443	14	133	5e-53	203
MLN2.Contig_1348	TGATTGCACGGGCATCTGCCCGATTGCAAAAGACGATCACCGAAGGTGATCTTCCTTCTCTCTGTGAGGAGGAAATGCGCATATTGCGCATGTCAAACTCTGCTTGGGACGCATCCCAAGCGGCCTCATCTAGTGGTGAGGCTCCGGCAGAAGATGCCGGGACGGCGCCCGTTGGGCCCGTCACCACGGCTCCCCCTGAGGGGGAGACCGGCCAGAGGGACGCCCCTGGCCAAACAAGGATTCCCCGTCGAGGGAATCAGGCTTCGAAGGATGCTCCTTCGAAGTCCGGAGCTAAATGACTCCGAGCCGCTTTAAGCGGTGTCGCCTTTTCAGGCGGCCCCTTCCCACGAGTGGGAGGGAAGGATCCGAGGCATCGGATTCCCAAGCCTCGACCTCGAA…	592	1	AT2G46900.1			similar to unnamed protein product [Vitis vinifera] (GB:CAO24357.1); contains InterPro domain Basic helix-loop-helix, Nulp1-type (InterPro:IPR006994)	44.44	36	20	0	333	440	566	601	0.28	32
MLN2.Contig_1349	GCATCACGGTCTACAAAACCTCCCCCGGAGACGATGACGTCGTTATCGGTAAAGGCTCGATCCCGTCGTTCGTTCACGGGAAGAAGAACACGACTCTGCTGAAATCGACGATCGGGAGTCCTCCGGGAGATCTTGATGAGCTGTCTGCGGGGAAGCTCAAGGGAGAGCTGAAGGCGAAGAAAGCGGTGGCGGTTAAGATTGTGCTTGATACGAAGGTGAAGGTGAAGATGGGATCTGTGAAGAGCCCTAAGTCGGGGATTAGGGTTACTTGCGAAGGGATTAAAGCGGCGGCTCCGTCCGGGAAGAAGTCGACGACGGCTGCTACCTCGGGCGCGAAGTGTAAGGTTGATCTTAGGATCAAGATCTGGAAATTCACTTTCTAACCGTTGGGGTAAAAAA…	546	1	AT1G17620.1			similar to unknown protein [Arabidopsis thaliana] (TAIR:AT5G11890.1); similar to unknown [Populus trichocarpa] (GB:ABK96083.1); contains InterPro domain Harpin-induced 1 (InterPro:IPR010847)	77.17	127	28	1	3	380	138	264	1e-40	162
MLN2.Contig_135	GGAGAGGCTCCACGACGAAGTCGACTTGACTTAAAAGAGAATCCCATCGTTATAAAATCCAAATTCCTTCGCTGCGTTTCTTCTGCATTGACCGGATCGCTTCGTTCTTACGCGGATTCATCCTCAATTCACCATGACTCGTGGAAGTCAGAGAGAGCGTGACCGTGAAAGAGCCGCGGCTCGTGCTGGAGGAAAAGGAAAGAATGCTGACGACGGGTTGACGCCGGAGCAACGCCGTGAAAGAGATGGAAAAGCATTGCAAGAGAAAGCAGCAAAGAAGGCTGCTCAGGCTGCAGCTGCTGCAGGTTCTGGTGGAGGAGCAGGAGGCAAAGGAACTGCTAAGAAGTGAAATCATTTGGTCTATCGCAATAATGTAGACTTTTACGGTTTTTTTTTTTA…	571	2	AT5G62560.1	armadillo/beta-catenin repeat family protein / U-box domain-containing protein		similar to armadillo/beta-catenin repeat family protein / U-box domain-containing protein [Arabidopsis thaliana] (TAIR:AT3G47820.1); similar to unnamed protein product [Vitis vinifera] (GB:CAO64395.1); contains InterPro domain Armadillo-type fold; (InterP	31.11	45	31	0	84	218	273	317	3.8	28.1
MLN2.Contig_1350	GAGGCCTCCTTTTTCACTCTAGAAGAACCCTAAACACATCCCCGCATCCCCCAATTCGATAATTTTTTTGGAGAAATTATCATTTGTTTAATCCGATTGATACGTGAACGATGGAAACGCCAATGGTTGCAGGTGCTGCTGTAGCGGCAGCTGCTTTAGCTGGTAGATATGGTATACTGGCTTGGCAAGCCTTCAAGGCCAGGCCACCCGCGGCTAGAATGCGCAGGTTTTATGAAGGTGGTTTTCAAACTGCCATGACGCGGCGTGAAGCTGCTCTCATTCTTGGTGTTAGGGAGAGGGTTGTGGCTGAGAAGGTGAAAGAAGCTCACAGGAGAGTGATGGTTGCAAACCACCCTGACGCTGGAGGTAGTCACTATCTCGCTTCCAAGATCAATGAAG…	519	1	AT5G03030.1	DNAJ heat shock N-terminal domain-containing protein		similar to DNAJ heat shock N-terminal domain-containing protein [Arabidopsis thaliana] (TAIR:AT2G35795.1); similar to unknown [Picea sitchensis] (GB:ABK25685.1); contains InterPro domain Heat shock protein DnaJ, N-terminal; (InterPro:IPR001623)	89.29	112	12	0	111	446	1	112	8e-38	152
MLN2.Contig_1351	TGATGTAGATAGTGATGGTGAAGATAGTGATGATGAAGATATTGATGAATCTCTGGATGTGTTTTTCCCCGCCCTCAAATCACTTTCTCTGATGGTTGCGCTTGATATTGAATCCTATCCCCGAATCATCCATGCTTGTCCTGTGCTGGAAGAGTTAACCATACGCAATGGGGACTTTTCAGATATGGGGCCACTTTGGGGGGGTACGGTTGTGGAACATGCATCCATCAAGCGTCTTGTGATTGCTACGCATGTTCCTCATCATATTGACTACTATCTCTTGTTAGAGTATTTCCAAAATGCTTGCCAAACAGTTCGTTTCCAAGCACCAAGTCTCGTCTACCTTGACTATTCTAGTCTTGTCTTTAGAAAGTATGACGTTGGTGATTTGGATTCTCT…	560	1	AT1G48400.1	F-box family protein		Identical to F-box/LRR-repeat protein At1g48400 [Arabidopsis Thaliana] (GB:Q56XW8;GB:Q9SX72); similar to syntaxin-related family protein [Arabidopsis thaliana] (TAIR:AT1G48390.1); similar to unnamed protein product [Vitis vinifera] (GB:CAO63569.1); contai	46	200	75	4	59	559	162	350	4e-28	120
MLN2.Contig_1352	GGCCTATCGATCCTTTAGACCTTCGGAATTTGAAGCTAGAGGTGTCAGAAAAGTTACCACAGGGATAACTGGCTTGCGGCAGCCAAGCGTTCATAGCGACGTTGCTTTTTGATCCTTCGATGTCGGCTCTTCCTATCATTGTGAAGCAGAATTCACCAAGTGTTGGATTGTTCACCCACCAATAGGGAACGTGAGCTGGGGTTAGACCGTCGTGAGACAGGTTAGTTTTACCCTACTGATGCCCGCGTCGCAATAGTAATTCAACCTAGTACGAGAGGAACCGTTGATTCGCACAATTGGTCATCGCGCTTGGTTGAAAAGCCAGTGGCGCGAAGCTACCGTGCGCTGGATTATGACTGAACGCCTCTAAGTCAGAATCCGGGCTAGAAGCGACGCATG…	592	1	AT1G54020.2	myrosinase-associated protein, putative		similar to myrosinase-associated protein, putative [Arabidopsis thaliana] (TAIR:AT1G54010.1); similar to myrosinase-associated protein [Brassica napus] (GB:CAA71238.1); contains InterPro domain Lipase, GDSL; (InterPro:IPR001087)	41.67	36	21	0	69	176	1	36	1.8	29.3
MLN2.Contig_1353	GGAAAATGGATGTTGAGGCGAGGAGCCTTCCACCGAGCATTAGGACCAGCCTCCTTGTTAAACTAAGAGAGTTCAAGTCTGATCTCAACAACTTCAAAAGCGAAGTCAAGAGGATCACATCTGCTAACTTGAACGCTGCTGCTCGCGACGAGCTGCTTGAAGCTGGTCTGGCTGACACAAAGACGGCTTCGGCTGATCAAAGAGCGAGATTGATGATGTCAACCGATCGATTGGGTCGAACTACTGACAGAATCAAGGACAGTCGAAGAATGATGATTGAGACTGAAGAGCTTGGCGTTTCTGTCCTCCAAGACTTGCACAGTCAGAGACAGTCTCTCCTTCGCACTGGCGACACGCTTAGTGGAGTAGACGAAAATGTCGGAAAGAGCAAGAAGATCT…	592	1	AT5G39510.1	ATVTI11/ATVTI1A/SGR4/VTI11/VTI1A/ZIG (VESICLE TRANSPORT V-SNARE 11); receptor	Encodes a member of SNARE gene family. Homologous with yeast VTI1 and is involved in vesicle transport. Mutant alleles such as sgr4/zig are defective in the shoots response to gravity resulting in a zigzag growth pattern of the stem. Involved in protein	Identical to Vesicle transport v-SNARE 11 (VTI11) [Arabidopsis Thaliana] (GB:Q9SEL6;GB:Q9FLY4); similar to VTI13 (vesicle transport v-SNARE 13), SNARE binding / receptor [Arabidopsis thaliana] (TAIR:AT3G29100.1); similar to vesicle transport v-SNARE 11-l	82.76	145	25	0	3	437	54	198	4e-65	244
MLN2.Contig_1354	GATCATCATTTCAGACTCTCTCTCTGAATTCTCAGCTCACGGAGAGAGAGAGATGGCGAGTTCCATTTCTTCAATGTCAACACGTTTTTGTTTCATCCCCAACAACAATGGGAGTCACAAACCAAACCCATGGCTCTATCAACAATCGCTAAGCTCGAACAGTCTCATATTCTATTCAAAGCATCATCCTCATCGTCGTCCACTATCTTCTTCCCAGATTCCCGTCGTGGAAACTGATGAAGAAGACGACAAAGATGGCCTTACTTTCAGTGGTTGCAGAGGATGCGGGAAGGAGGTGAAAGAGAATGGTTGCAACGGCGACGGGCGGATTCAAGGAGGCATTGCCACTGTCCCTGGCTTCGGTTGGTGGCCCATTAAGGCTTACAGGCCTTGTCCCGG…	552	1	AT5G42070.1			similar to unnamed protein product [Vitis vinifera] (GB:CAO69519.1)	76.71	146	33	4	53	487	1	141	2e-55	211
MLN2.Contig_1355	CGGTTGACGGCAACGTTAGGGAGTCCGGAGACGTCGGCGGGTGGAAAACCCTTTTCGCTCCGCTTAGCCCTATCCCCCTCTAGGAGTATTTTAGTGATAGGTTCTATAGGAACCGGACGATCCTATTTGGTCAAATACCTAGCGACAAACTCCTATGTTCCTTTCATTACAGTATGTCTGAACAAGTTCCTGGATAACAAGCCGAAAGGTTTTTTTCTTGATGATATCGATATTGATGATAGTGACGATATTGATGCTAGTAACGATATTGATCGTGAACTTGATACGGAGCTGGTTGCATCATCCCTGAAGCCTTAAACAAATATGGCGCTAACTGTGGCCCCGAAGCCGTCTGGTTTAAGACTGGTGCTCTTCTTCTTGATGGAAACACATTGAGCT…	523	1	AT4G10340.1	LHCB5 (LIGHT HARVESTING COMPLEX OF PHOTOSYSTEM II 5); chlorophyll binding	photosystem II encoding the light-harvesting chlorophyll a/b binding protein CP26 of the antenna system of the photosynthetic apparatus	Identical to Chlorophyll a-b binding protein CP26, chloroplast precursor (LHCB5) [Arabidopsis Thaliana] (GB:Q9XF89;GB:Q8LAB1); similar to LHCB2.1 (Photosystem II light harvesting complex gene 2.1), chlorophyll binding [Arabidopsis thaliana] (TAIR:AT2G051	97.4	77	2	0	291	521	126	202	7e-29	123
MLN2.Contig_1356	GTTGTTGTCAGTTTTTAGAGTTTCTGAAAACTTATGCCTGACCGGTCTTTTTTTTTAACGTTTGGACCAATAATACCCTTTTCTATTTTGGTTTTACCACTTAGTCTTTATAGTTGTTTGTGAAAAGACAAACAGTTCTAATGTTATATGCTTTGAGTCTTAAAAAAAAAAAAAAAAAAAAAAAAAAAAAAAAAAAAAAAAAAAAAAAAATT	212	1	no significant hit
MLN2.Contig_1357	CACAGTGCGAATAACCGATTACTGTATTCACCGTCTGATGAGTTCATCTGGTGTAGCCGAACAGATACTAAACATGAGTGCACTTGGTTACTCAGCTCCTGAACTTGCATCAGCTTCAAAACCAGTTCCAACGCTCAAATCCGATGTCTATGCGTTTGGGGTGATTCTTATGGAGCTTCTGACTAGACGGAGCGCAGGTGACATAATCCCAGGCCAATCAGGAGCCGTTGATCTGACGGATTGGGTGAGGTTGTGTGATCAGGAAGGTAGGAGAATGGATTGCATAGACAGAGACATTGCAGGTGGGGAAGAATTCTCAAAGACAATGGAGGATGCACTTGCTATTGCAATCAAGTGCATTGCTTCTGTAAATGAAAGGCCTAACATCAGACAAGTTCT…	546	1	AT5G10020.2	leucine-rich repeat transmembrane protein kinase, putative		similar to leucine-rich repeat family protein [Arabidopsis thaliana] (TAIR:AT4G20940.1); similar to 52O08_19 [Brassica rapa subsp. pekinensis] (GB:AAZ67565.1); similar to 117M18_5 [Brassica rapa] (GB:AAZ66924.1); similar to unnamed protein product [Vitis	91.67	132	11	0	2	397	860	991	6e-66	246
MLN2.Contig_1358	CATGCAAAAACCTATGGTGATGTCCAAAGCGATTTCCTCGCACAAGGGTTCGGGTCACTTGGACTGATGACATCTGTTCTGGTCTGCCCGGATGGGAAGACGATTGAAGCTGAAGCAGCTCATGGAACCGTTACCCGTCACTACAGGGTTCACCAGAAAGGTGGCGAGACGAGCACAAACAGCATAGCCTCCATCTTTGCTTGGACTCGTGGACTTGCACACAGGGCTAAGTTAGATGACAACTCAAAACTCTTGGAATTTACTGAGAAGCTTGAAGCTGCTTGTGTCGGTACAGTGGAGTCTGGAAAAATGACCAAAGATCTTGCTCTCATCATTCACGGCTCAAAGCTCTCGAGGGACACTTACCTGAACACGGAGGAGTTCATCGATGCAGTTGCG…	576	1	AT1G65930.1	isocitrate dehydrogenase, putative / NADP+ isocitrate dehydrogenase, putative		similar to ICDH, isocitrate dehydrogenase (NADP+) [Arabidopsis thaliana] (TAIR:AT1G54340.1); similar to isocitrate dehydrogenase, putative / NADP+ isocitrate dehydrogenase, putative [Arabidopsis thaliana] (TAIR:AT5G14590.1); similar to NADP specific isoci	96.3	135	5	0	16	420	274	408	6e-70	259
MLN2.Contig_1359	GGTGGAGAACATGAGCGGTTTGTCTCAGCCGTTGGCGGATGTCAAGTTCATGGAGATTGGTTCTTCCGTTGACGTGACGCAAAAGGTAATCTCTTGCTTGAGAGAGAACGCACCAGAGCTTCTCAACGTCTTGGCTTGCAGCGAAGTGTTTGACAGCAGTGGAGGCGGTGCAGAGAGGATGTGCAGGGAAATGGGAGTGCCGTTTCTTGGGAAAGTTCCATTGGATCCACGGCTTTGCAAAGCAGCAGAGCAAGGTAAGTCGTGCTTTGAGGGGAACAACAAGTGTTCTGTTAGCGCACCTGCGCTGAAGAGCATCATACAGAAAGTCCTTGCTTCGATGACCGAGTGAAGTTTAAGACTCCCACTAAACAGATCCTTTGGTTGGATCTGTAGATAGAC…	512	1	AT5G50960.1	nucleotide-binding family protein		similar to unknown protein [Arabidopsis thaliana] (TAIR:AT4G19540.1); similar to H0811E11.6 [Oryza sativa (indica cultivar-group)] (GB:CAC09490.2); similar to OSJNBa0081L15.19 [Oryza sativa (japonica cultivar-group)] (GB:CAE03157.2); contains InterPro dom	79.34	121	19	3	2	346	231	350	7e-48	186
MLN2.Contig_136	GAGAGGAAAGCGATGTCTCTCACGATCCCGACGAACCTCGTCCTCAACAAGAAGACTCTCACTCAATCCTTACCTAAATCCACCGCGAGATTCGTCTGCTCCACCGATGACAACAAGTCCCTGAAGGCACTCTCCGCGGCGGTGGCTCTCTCTTCCATCCTCCTCTCATCTCCGATGCCAGCCGCCGCTGATATCTCGGGCCTAACCCCTTGCAAGGAGTCTAAACAGTTCGCCAAGAGGGAGAAGCAGCAGATCAAGAAGCTCCAATCATCTCTCAAGCTCTACGCTCCCGAGAGTGCTCCTGCTCTTGCTCTTAACGCTCAGATCGAGAAGACCAAAAGAAGGTTCGACAACTACGGAAAGTACGGGCTTCTGTGCGGGGCAGACGGGCTACCACAC…	654	2	AT1G31330.1	PSAF (photosystem I subunit F)	Encodes subunit F of photosystem I.	similar to unknown [Populus trichocarpa] (GB:ABK96023.1); contains InterPro domain Photosystem I reaction centre protein PsaF, subunit III; (InterPro:IPR003666)	86.88	221	21	2	13	651	1	221	6e-88	320
MLN2.Contig_1360	GAAAGGAGAGAAGTTCCACGGTAAAAAGTGTATTGTTACTGCGGGTGCATGGATAGGTAAGCTGGTGAAAACGGTGGCCGGGATAGAGTTTCCGGTGGATCCGCTTGAGACGACGGTGTGTTGCTGGAGAATCAAAGAAGGCCACGAGGACAAGTTCGCGATAGACTCAGAGTTTCCTACGTTCGCGTCCTACGGAGCTCCTTACGTGTATGGAACTCCGTCTCTGGAGTATCCGGGACTTATCAAAGTGGCGGTTCACGGTGGTTACCTCTGCGATCCAGATAAGAGGCCATGGGGACCAGGAGTGAAGCTAGAAGAGCTTAAAGAGTGGATCAAGGAGAGGTTTGGAGGGATGGTTGATACTGAAGGACCTGTGGCGACTCAGCTTTGTATGTACTC…	587	1	AT2G24580.1	sarcosine oxidase family protein		Identical to Probable sarcosine oxidase [Arabidopsis Thaliana] (GB:Q9SJA7); similar to unnamed protein product [Vitis vinifera] (GB:CAO63139.1); contains InterPro domain Sarcosine oxidase, monomeric; (InterPro:IPR006281); contains InterPro domain FAD dep	88.27	196	22	1	2	586	196	391	2e-93	337
MLN2.Contig_1361	GGGCGGCGGCCCAAGAACCTTTCCGGGCGGCGTCTCAAAGTGGCAGTGGAAGAGGATGCAAGCGAAGAAGCAGAAACAGCTCCTCAAAGCGCGGTTATCCCGTGAACGCCAGATCTACGAGATGCGTAAACGCGCCGAGCTAAAAGCTGCGGTGGCTGAGCTTGAGAGACCGTGGGAACCGGTTCAGAAACCGCCGAATCTCTTCTCGGTTTGCGCCGACGAGCAGGTTAAGGTTTTAGCGGACCGGTTTCAGAAACCGGGCGGGTTTGATCTCTGGACCGAGAGGGATGGCCCGCAGCTGTTTGACGCCGTTGATGATTTGCCTTCCGCTAGGTTCTTCCCTAAAGGTGCTGTTCACAGTGTGAAACCGTACCGGAGTTTACCGAGCTCCGGTGAGTC…	480	1	AT2G37920.1	EMB1513 (EMBRYO DEFECTIVE 1513); copper ion transmembrane transporter		similar to DEAD box RNA helicase, putative [Arabidopsis thaliana] (TAIR:AT2G07750.1); similar to hypothetical protein [Vitis vinifera] (GB:CAN73407.1)	82.8	157	22	2	2	457	51	207	4e-57	216
MLN2.Contig_1362	CTTGTGGTTCTTCGTCTGCATCCTCGGAGGTGTGGTAAAGGTTTGTCGTCTATGGCTTTCTCGTCTGCGTCTCATGAGGGTGCTCTCCCTTTGCTCTCTTCTCCCATGTATCTGGTCGAGCTTCTGTGGCTTTGTTTCGTTTCGTCTTTGACGGGTCCGAAGCGCTCAAAGACCGAGACAGGTGTTCTGTTTCGGATCAGGTCGTCGTCTTGTAGCGCTGGTTGGGTCAGCCGGTTGCGTGGACGGTGAGGTCACCTGGTTAAGGAATGGTCATCCCAGTGCTTGGACGGCCTTTTGGTTTTCTCTGCAGGTCGTTCCTTTTCTTTTAGCGGGCTCTGAAGTGTTCTACTCAGGTTTGTCTCCATCACAGCCTGTGTTTGTGTTTGTTTTGAATAAGGC…	604	1	no significant hit
MLN2.Contig_1363	TTCCACATTCTTCAAAGGCTCTCTCTTCTTCTGGTTCGCCTGATGGGAAAAGACTTCACCAGTGGTTTCATGAAGGTGGCGCAGGGACACTAATGGATTATAGCATGTGCACCGAGGTTTTTCAGTTCGATATTTCTCCAGGTGCTATAGTCCCATCATCAGTCTCCAACATTACAAGGGAGCATCTCCAAAATGTCACTACCACCCGAGACAAGAGAATGAAGAACAGGAGGATTCTCGAGGGGCTTCCGGTTTCACGTTTGGCATCTGAGCTTAACATCACGGAAGCCCAGGCGAGCAAAGACGCCCAAAACAAGACCTTTCATGGGAAAGCTAATACCAAACCCACATCATCATCAATGGTTGTTTCAGTGTTGCTTGATCCAAGGGAGGTCGTTG…	598	1	AT3G10800.1	BZIP28; DNA binding / transcription factor	bZIP28 has a similar domain structure to the mammalian ATF6 protein involved in the unfolded protein response (UPR), and shares a bZIP domain, transmembrane domain, and a canonical S1P cleavage site. The bZIP28 seems to be glycosylated in vivo. bZIP28 doe	similar to BZIP17, DNA binding / transcription activator/ transcription factor [Arabidopsis thaliana] (TAIR:AT2G40950.1); similar to cAMP response element binding (CREB) protein [Medicago truncatula] (GB:ABN09189.1); contains InterPro domain bZIP transcri	82.02	178	32	3	3	536	504	675	3e-75	277
MLN2.Contig_1364	GATTGTATATGTCAAAATGTGCTTGTCTTTATTAGGCTTTAGTCTAGTTCCCTTATGGCTTTTGGTATCAGAGTCGGGACTTAGGAGAGTCGCTTTCCTCTGGTGAAGTTCGTATGAAGTCATGAATCATGATAAGCTTTCTTTTGCTGGTTCAGGTCGTGTTTTTACTTCTCTGACCTGGTTGGTTTATCTTGTTGATGATAAGTTCCCTGGTTAATAAGATTGTAGTAAAAGCGAAGATCATTGTAGTGAAAAAAAAAAAAAAAAAAAAAAAAAAAAAAAAAAAAAAAAAAAAAAAAAAAAAAAAAAAATT	313	1	no significant hit
MLN2.Contig_1365	TGATTCAGGAGCTCTGCTTAACGATACATTCCTGCTTGATTTGTCAATGGATATACCGACGTGGAGGGAGATAAGAGTTCCGTGGTCTCCACCATCTCGCCTCGGACATACTTTAACCGTGTACGGTGACAGGAAGATCCTTATGTTTGGTGGTCTTGCGGAATATGGTTCGAGGAGGTTCCGGTCTAATGATGCGTACACGATGAATCTTAGTGAGAATGAGCCGTGCTGGAGACCTTTGGTTGGGTATGGAACTAGCCTTCCTGGAGGCGTGGCAGCTCCGAGGTTGGATCATGTGGCGATTAGTCTCCCGGGTGGGCAGATCTTGATCTTTGGTGGTTCGGTTGCGGGGATTGACTCGGCTTCTCAGCTTTATCTTCTTGATCCAACGGAGGAGAA…	437	1	AT2G18915.2	LKP2 (LOV KELCH PROTEIN 2); ubiquitin-protein ligase	encodes a member of F-box proteins that includes two other proteins in Arabidopsis (ZTL and FKF1). These proteins contain a unique structure containing a PAS domain at their N-terminus, an F-box motif, and 6 kelch repeats at their C-terminus. Overexpressi	Identical to Adagio protein 2 (ADO2) [Arabidopsis Thaliana] (GB:Q8W420;GB:Q9C5S6); similar to ZTL (ZEITLUPE), ubiquitin-protein ligase [Arabidopsis thaliana] (TAIR:AT5G57360.1); similar to FKF1 (FLAVIN-BINDING KELCH DOMAIN F BOX PROTEIN), ubiquitin-prote	84.14	145	21	1	2	430	419	563	5e-69	256
MLN2.Contig_1366	GTTTCCTTCTCCGGCGTTTCAGGCTACATTCCAAAGGCCAACTTCAGAAACCCTTCAAGTGTCTCTAACAGGAGCTTTGAGGATGAAAGTGGACTCGACCGGGATCGATATAATGGTGGCGCTATACGAGAACGGACTAGTGACTGATTGCCCTCGAGGAGAGAACTCGGGAAGAGTCTTGGCCAATGACTACGTTGTAAGAAAGCTAGAAAAGTTATGCACAGTAAAAGATTTAGCGGCCAAGAAAACGATCTCGGAAACGGCTCATTTCACGGTATGGGATGGGTTCAACAGTGCTAAATGTGGAGTCGCTGTTTTTCTTCAGAACGCATCTCTTCAAATTTTTGGTACGCAGAGTTTTCAATTGCCTGATGAGATTTGACAAAAAATAAACAAAAG…	444	1	AT5G54240.1			similar to unknown protein [Arabidopsis thaliana] (TAIR:AT4G27350.1); similar to unnamed protein product [Vitis vinifera] (GB:CAO39196.1); contains InterPro domain Protein of unknown function DUF1223 (InterPro:IPR010634)	91.27	126	11	0	2	379	157	282	1e-62	234
MLN2.Contig_1367	AGTTCATGGATACTCACGCCAGGTTTGGAATATTCCCTTCTTGGGGACTGTCTCAGAAGCTGTCGAGGATCATCGGAGCAAACAAAGCTCGTGAAGTTTCTTTAACGTCGATGCCGTTGACAGCTGACGTGGCTGAGAAGTTAGGGTTCGTAAACCACGTGGTTGAAGAAGGGGAAGCTTTGAAGAAAGCCAGAGGAATCGCGGAGGCTATCATCAAGAATGAACAAGGCATGGTTCTGCGTATTAAGTCTGTCATCAATGATGGACTCAAGCTTGATCTTGGTCATGCTCTTACTCTCGAAAAGGAGCGAGCTCACGCGTACTACAGTGGGATGACAAAGGAACAGTTCAAGAAGATGCAGGAGTTCATAGCTGGACGTGGTTCCAAGAAACCTTCTT…	562	1	AT4G16210.1	enoyl-CoA hydratase/isomerase family protein		similar to naphthoate synthase, putative / dihydroxynaphthoic acid synthetase, putative / DHNA synthetase, putative [Arabidopsis thaliana] (TAIR:AT1G60550.1); similar to putative enoyl CoA hydratase [Cicer arietinum] (GB:CAB61740.1); contains InterPro dom	97.76	134	3	0	3	404	131	264	5e-69	256
MLN2.Contig_1368	GTCTCATCGCTGCTAGCATCACTGAGTTCACGTCGAACAACGCAACCACTACACTGTTGGTTCCTTTGCTCATCGAGATTGCGAAGAATATGCAAATCCATCCTCTCCTCCTGATGGTCCCTGGTGCCATCGGGGCTCAGTTTGCGTTCTTGCTACCCACTGGAACACCTTCTAACGTGGTGGGATTCACAACAGGGCATACTGAGATCAAAGACATGATTAAAACAGGGTTGCCTCTCAAGATCGCAGGAACCGCCTTTCTCTCTGTCTTGATGCCAACTCTTGGGACTTACGTGTTTGGATCAAAAGGAGGAGTTTAGTTCTATGGGCTGAAGTACTATCGATTCATTGTATTATATTCTTACAAGGGGACATCAGTCGCAGGTGAAACGGGAAATG…	492	1	AT5G47560.1	ATSDAT/ATTDT (TONOPLAST DICARBOXYLATE TRANSPORTER); malate transmembrane transporter/ sodium:dicarboxylate symporter	Encodes a tonoplast malate/fumarate transporter.	Identical to Tonoplast dicarboxylate transporter (TDT) [Arabidopsis Thaliana] (GB:Q8LG88;GB:Q9FEH9;GB:Q9FGK1;GB:Q9MAW4); similar to vacuolar citrate/H+ symporter [Citrus sinensis] (GB:ABK27327.1); similar to sodium-dicarboxylate cotransporter, putative [	92.38	105	8	0	3	317	436	540	2e-49	191
MLN2.Contig_1369	CTTGCGGCTATTGTCATGTGGAGCAGCCACCGCGAGCCAAGCATTGTCATGATTGTGATCGATGTGTTCTTCAGTTTGATCATCACTGTGTTTGGCTGGGAACATGTGTTGGCCAGAAAAACCATTGTAAATTCTGGTGGTACATATGTGAAGAGAGTGCTCTATGCATCTGGACACTCATCATGTACATTGACTACCTTACTAACGTAGCCAAGCCTTGGTGGAAGAATGCAATCATCATACTACTCCTTGTCGTATTGGTAATCTCCATGATATTTGTGCTGCTTCTATTGCTTTTTCACAGCTACCTCATTCTAACGAATCAAAGCACCTATGAACTTGTGAGACGAAAACGTATTCCCTACATGAGGAATATTCCGGAACGAGTGCATCCATTTA…	571	1	AT3G51390.1	zinc finger (DHHC type) family protein		similar to zinc finger (DHHC type) family protein [Arabidopsis thaliana] (TAIR:AT3G48760.1); similar to unnamed protein product [Vitis vinifera] (GB:CAO23721.1); contains InterPro domain Zinc finger, DHHC-type; (InterPro:IPR001594)	89.27	177	19	0	3	533	164	340	1e-85	312
MLN2.Contig_137	TAAAAGAAGGAGAGAGGGCTGCGTTGTTGGGTTATGGCTCAGCGGTTCAGAGCTGTTTAGGAGCAGCAGCGATGCTCCAAGAACGTGGCCTAAACATAACCGTGGCAGATGCACGTTTCTGCAAGCCGTTGGACCGTGCTCTTATTCGCAGCTTAGCTAAGTCGCACGAGGTACTGATCACGGTTGAAGAAGGTTCCATTGGCGGGTTTGGATCCCACGTTGTTCAGTTTCTTGCTCTTGATGGTCTTCTCGATGGGAAGCTCAAGTGGAGACCAATGGTGTTGCCTGATCGGTACATCGACCACGGCTCACCAGCTGACCAAATGGCTGAAGCTGGACTCATGCCATCTCATATCGCAGCAACTGCACTTAACTTAATCGGAGCACCATGGGAAGCTC…	645	3	AT4G15560.1	CLA1 (CLOROPLASTOS ALTERADOS 1)	Encodes a protein with 1-deoxyxylulose 5-phosphate synthase activity involved in the MEP pathway. It is essential for chloroplast development in Arabidopsis	Identical to Probable 1-deoxy-D-xylulose-5-phosphate synthase, chloroplast precursor (CLA1) [Arabidopsis Thaliana] (GB:Q38854;GB:O23407;GB:O49738); similar to DXPS3 (1-DEOXY-D-XYLULOSE 5-PHOSPHATE SYNTHASE 3), 1-deoxy-D-xylulose-5-phosphate synthase [Ara	94.03	134	8	0	3	404	584	717	2e-61	231
MLN2.Contig_1370	GAAGATGCATTATCTCAAGGGATGGAGAGTTTACAGCAATCATTAGCTGATACTTTATCTAGTGGTACTCTTGGTTCCAGTTCATCTGATAATGTGGCGAGCTACATGGGTCAGATGGCCATGGCAATGGGACAGTTAGGCACCCTCGAAGGATTCATCCGCCAGGCTGATAACTTGAGGCTGCAGACACTGCAACAGATGATTAGAGTGTTAACAACGCGTCAGTCAGCTCGTGCTTTTCTTGCCATACATGATTATTCATCTCGACTACGTGCTCTTAGCTCCTTGTGGCTTGCCCGGCCAAGAGAGTGAATACACAAGAGTAGTGCTTTGCTCACCTTTATACATAATCTTACAATTCAAAATCGGTAGGAATACACCTTCCAAGAGATCACAAAG…	597	1	AT5G06950.4	AHBP-1B (bZIP transcription factor HBP-1b homolog)	Transcription factor of the B-ZIP family that has high affinity for C-box motifs. Interacts with NPR1 and may regulate PR gene expression. Phosphorylated by a CK2-like protein in vitro. Phosphorylation is enhanced by salicylic acid treatment.	Identical to Transcription factor TGA2 (TGA2) [Arabidopsis Thaliana] (GB:P43273); similar to TGA6 (TGA1a-related gene 6), DNA binding / transcription factor [Arabidopsis thaliana] (TAIR:AT3G12250.2); similar to TGA6 (TGA1a-related gene 6), DNA binding /	96.51	86	3	0	1	258	228	313	2e-24	108
MLN2.Contig_1371	CCGCTATGTCTTCGTTATGACACGCGGCGGCTACGGCTCTCTCTCGAGCCTGTTCTAACGTCGAGTTAAGCGTCGCGACCATCGCTTCGTTCTCACGAGCCATCCTCTGCCACGTTTGATTCTCCATTTCCATTTTCCTCAACAGATCCTCGAGCTCCATGTTCTTGCTCAGGGCTCTCGACATCTCTTCCTCCTTCTGCGTCATCAAAACCAAAGCTTTCGCCTCCATCTTCCTCAACATCGTCTCCATCTCTTGCCTCCTCTGTTCTTGCAACGCGTATCTCAACCTCTCGTTCTGTTAAAAAGACGAAACCTTTATCAGTACCCATGTTTTAAAAACCAAATCTTTTTGGTAAGATGATATGATTACGAACCTGGACTCTGATGAACTGGTCGATC…	543	1	AT3G59340.1			similar to unknown protein [Arabidopsis thaliana] (TAIR:AT3G59310.1); similar to Os05g0299500 [Oryza sativa (japonica cultivar-group)] (GB:NP_001055130.1); similar to hypothetical protein OsI_018658 [Oryza sativa (indica cultivar-group)] (GB:EAY97425.1);	31.11	45	31	1	162	296	82	125	7.7	26.9
MLN2.Contig_1372	GGATGAAACGTAGGCAGTTGCCTTCTCGGTTAAGACAGAGAGTTAGGAGATTTGAGCGGCAGAGATGGACTGCCTTGGGTGGAGAGGACGAGCTGGAACTTATACAAGATCTGCCTCCGGGTCTTCGGAGAGATATTAAGAGATGTCTTTGCGTTGATCTCATTAACAATGTTCCATTGTTCAGGGGCATGGACGATTTGATCCTAGACAACATTTGCGATCGTGCTAAGCCTCGTGTCTACTCTAAAGACGAAAAGATCATCCGGGAAGGAGATCCTGTACAGAGAATGATATTCATCATGCGTGGGAGAGTGAAACGTAACCAGAGCCTAAGCAAAGGCGTGGTAGCCACTAGTACGCTCGAACCAGGCGGTTACTTAGGCGACGAGCTACTCTCAT…	601	1	AT5G15410.1	DND1 (DEFENSE NO DEATH 1); calcium channel/ calmodulin binding / cation channel/ cyclic nucleotide binding / inward rectifier potassium channel	'defense, no death' gene (DND1) encodes a mutated cyclic nucleotide-gated cation channel; Same as CNGC2 (article ID 229): Cyclic nucleotide gated channel, activated by cAMP, conducts K+ and other monovalent cations but excludes Na+, does not contain the G	Identical to Cyclic nucleotide-gated ion channel 2 (CNGC2) [Arabidopsis Thaliana] (GB:O65718); similar to ATCNGC4 (DEFENSE, NO DEATH 2), calmodulin binding / cation channel/ cyclic nucleotide binding [Arabidopsis thaliana] (TAIR:AT5G54250.2); similar to	93.97	199	12	0	3	599	473	671	7e-98	352
MLN2.Contig_1373	CAAACAGATCTCATCTTGTGGCTAAGCTTATCTTCCTAGATCAACTCTGTGAGAGCTCACCGTTCCTGCCAAGAAGCTCCCTTGAATCACATGTTCCATACACAATCCTCAGGTCAATCTACACTCAATACTACTCCAACACACCGTCCACACCGCTGGCAACTGCATCCCCACACCATCCCCCATCTGTATCGCTCATCCACGCTTCTCCCTCCATGAAAAACGCGACCACTCCCCGTGGTAGTGGTAGCGGCAGTAGCACTGCTGCAGGTGCGGATTCAGGGTACTTCAAAGGCTCGTCATCCTCAGTCTACAGTCAGGAACACTACAACGAACCTGAGACTGGAACCTCTAGGAACAATGAAAACAAGAGCAAACAAAGGGGTAGTTCTCGTCGTT…	550	1	AT2G35110.2	GRL/NAP1/NAPP (NCK-ASSOCIATED PROTEIN)	Component of the WAVE protein complex which act as activators of ARP2/3 complex involved in actin nucleation. Required for trichome morphogenesis. Mutant displays distorted trichomes, a phenotype that can be phenocopied by treatment of WT plants with acti	Identical to Protein NAP1 (NAP1) [Arabidopsis Thaliana] (GB:Q5S2C4;GB:O82180;GB:Q66GU3;GB:Q6BDH4); similar to unnamed protein product [Vitis vinifera] (GB:CAO41971.1); similar to hypothetical protein OsJ_027019 [Oryza sativa (japonica cultivar-group)] (G	88.07	176	18	2	3	521	1221	1396	3e-61	231
MLN2.Contig_1374	ATGCTATGTGGAAGAAGAAGAGGCAAGTGGTAAATACTGGTGCGGCATCTGTGAGAGAGAAACCGATCCAAAGAAATGGTTCTACACGTGTAAAGATCACTTGGCTAGTTTGCATACAAAATGTGTGCTCGGAGACACTGCAGGACTCATGCCAAGAAGCGTACCAAAGTTGTTGGGCATACCGCATGAGGTGGTGCTGAATAATAGTGTAACTCGCCCATTTTGCATTCGGTGCAAGTCTCGTTGCATGTACCCTATCTACCTCAAGGTGCTTGGGTCCCCAGATATATGCTTTTGCTCTGTTGAGTGCTCTCTTGTTTACGTTTGATATGGGAAGAGGTAGAGCGAAATGAACAATCATAACTACAAAGTGTAATAAATATTAATAAGCCATGGAGG…	612	1	AT4G11390.1	DC1 domain-containing protein		similar to DC1 domain-containing protein [Arabidopsis thaliana] (TAIR:AT4G01760.1); similar to DC1 domain-containing protein [Arabidopsis thaliana] (TAIR:AT4G11540.1); similar to DC1 domain-containing protein [Arabidopsis thaliana] (TAIR:AT4G11550.1); sim	81.82	22	4	0	410	475	315	336	3e-11	45.8
MLN2.Contig_1375	GGAGAGATATGCATCCGCGGCCACCAAATCATGAAAGGCTACCTCAATGACCCGGTGGCCACAGCAGCAACGATAGACAAAGAAGGTTGGCTTCACACCGGAGATATTGGATTTGTCGACGATGACGACGAGCTTTTCATTGTCGATCGCTTGAAAGAGCTTATCAAGTACAAGGGATTCCAGGTGGCTCCGGCGGAGCTCGAGTCTCTCCTCATTTCTCACTCGGACATCAATGATGTTGCAGTGGTCGCCATGAAAGAAGACGATGCTGGTGAGGTTCCTGTTGCTTTTGTGGTGAGATCCAAAGAGTCAAATTTATCGGAAGATGAAATTAAGCAATTTGTGTCAAAACAGGTTGTGTTTTACAAGAGAATCAACAAAGTTTTCTTCACTGACTCC…	638	1	AT3G21240.1	4CL2 (4-coumarate:CoA ligase 2); 4-coumarate-CoA ligase	encodes an isoform of 4-coumarate:CoA ligase (4CL), which is involved in the last step of the general phenylpropanoid pathway. The catalytic efficiency was in the following (descending) order: p-coumaric acid, caffeic acid, ferulic acid, 5-OH-ferulic aci	Identical to 4-coumarate--CoA ligase 2 (4CL2) [Arabidopsis Thaliana] (GB:Q9S725;GB:Q53Z06;GB:Q56ZS8;GB:Q9LU35); similar to 4CL1 (4-COUMARATE:COA LIGASE 1), 4-coumarate-CoA ligase [Arabidopsis thaliana] (TAIR:AT1G51680.1); similar to 4CL1 (4-COUMARATE:COA	92.26	155	12	0	1	465	400	554	2e-79	291
MLN2.Contig_1376	TCAGCCGTATAAAGACGTGGCTCTGTCTTACCTCTTCCTCGCTAATAATCTCCAATACGTCGTCGTAAAGGTTCGAACGTCTAACGTGAAGCTCCTCCTCGGGGAGGATTGGGTGGTGAGGCACGAGGGGAAGGTGAAGCAGTACGCGGATAAGTTCGAGAAGCTCGCGTGGGGGAAAGTGCTGACGTCGTTACCGGAATATAAGGCGGAGGAGATCACGCCGGAGGAGACTAAGGAGTTGTTAGTCAGGTTCGACGACGAGTTCGAGGCGTCGTACCGGAAGCAAATATCGTGGGTCATACCCGACCCGAAACTTAGGGACTGGATCAAAGTCTCGTTGAGTCATAAACTGATGCTGGTTTGTACCGAGTTATACGAGATAAACCGGTTCGGTTCGGG…	521	1	AT5G59730.2	ATEXO70H7 (EXOCYST SUBUNIT EXO70 FAMILY PROTEIN H7); protein binding	A member of EXO70 gene family, putative exocyst subunits, conserved in land plants. Arabidopsis thaliana contains 23 putative EXO70 genes, which can be classified into eight clusters on the phylogenetic tree.	similar to ATEXO70H6 (exocyst subunit EXO70 family protein H6), protein binding [Arabidopsis thaliana] (TAIR:AT1G07725.1); similar to hypothetical protein [Vitis vinifera] (GB:CAN66786.1); contains InterPro domain Exo70 exocyst complex subunit; (InterPro:	75.8	157	35	1	2	463	440	596	2e-63	238
MLN2.Contig_1377	GGTCAACCATGGCGTCCCCATCCATCTCCTCGATCGCATGAAGGCTCTAGGCCTCTCCTTCTTCCAAGACTGTCCGTTGGAAGAGAAGCTCCAATACGCCTGCGACTCAACCTCCGCCGCCTCCGAAGGTTACGGAAGCCGCATGCTCCTCGGAGCCGAAGGCGACGTCGTTTTGGATTGGAGAGATTACTTCGATCACCACACGTTCCCTCTCTCTCGCCGCGACCCTTCTCATTGGCCGTTACGTCCTCCTCACTACAGACAAGTAGTGGAAGAGTATGGTAATGAGATGAAGAAACTAGCTCAAAAGCTGTTGGGGATAATCTCAGAGAGCTTGAGCCTTCCATGCTCATCTATAGAGGAAGCCGTTGGAGAAATCTATCAGAACATTACCATGAG…	567	1	AT4G16330.1	oxidoreductase, 2OG-Fe(II) oxygenase family protein		similar to oxidoreductase, 2OG-Fe(II) oxygenase family protein [Arabidopsis thaliana] (TAIR:AT2G38240.1); similar to naringenin 3-dioxygenase like protein [Brassica napus] (GB:CAC14568.1); contains InterPro domain 2OG-Fe(II) oxygenase (InterPro:IPR005123)	85.8	176	25	0	38	565	1	176	7e-87	316
MLN2.Contig_1378	GACTTTCTCTCTCTAAACTTTTAACAAACATTCGATCCCATCATCTCCGATTCAAAGCCATGGCTCGTACGAAGCAGACTGCGAGGAAATCCACCGGAGGGAAAGCTCCGAGGAAGCAACTCGCCACCAAGGCTGCGAGGAAATCAGCACCGACCACCGGAGGAGTCAAGAAGCCTCACCGTTACCGTCCCGGAACCGTCGCTCTCCGTGAGATTCGTAAGTACCAGAAGAGCACTGAGTTACTTATCCGTAAACTTCCCTTCCAGCGTCTTGTTCGTGAAATCGCCCAGGATTTCAAGACGGATCTGAGATTCCAGAGCCATGCAGTGTTGGCACTTCAGGAAGCTGCGGAGGCGTACTTGGTGGGTTTGTTCGAAGACACGAATCTGTGTGCCATTC…	521	1	AT4G40030.2	histone H3.2		Identical to Histone H3.3 (HTR8) [Arabidopsis Thaliana] (GB:P59169;GB:Q6NR95); similar to histone H3 [Arabidopsis thaliana] (TAIR:AT5G10980.1); similar to histone H3.2 [Arabidopsis thaliana] (TAIR:AT4G40040.1); similar to histone H3.2 [Arabidopsis thalia	94.52	146	8	0	30	467	19	164	5e-72	266
MLN2.Contig_1379	CTGCTGCGCCAGTGCGGGATCGATTTCAAAAAGAACGTCGAGAGGGGGATCGATGTGGTTCGGTTCGGGGAGCTGATGATGTCGTCGGGGATCGTGCTGAACGATTCGATCTCGTGGATTACTTTTCATGGCGGTTATGATTTTGGTTATTTGGTGAAGCTTCTGACTTGCAAGGAGCTGCCTCTCAGGCAGGCGGATTTCTTCAAGATGTTGTTTGTGTATTTCCCCACGGTTTACGATATTAAGTACTTGATGACTTTCTGCAACGGGCTTTTCGGAGGGCTGAACAGGCTTGCGGAGCTTATGGGTGTGGAGAGAGTTGGGATTTGTCATCAGGCTGGGTCGGATAGTTTGCTCACGTTAGGCTCGTTTAGGAAGCTCAAGGAGCGTTATTTCCCT…	551	1	AT5G10960.1	CCR4-NOT transcription complex protein, putative		similar to CCR4-NOT transcription complex protein, putative [Arabidopsis thaliana] (TAIR:AT1G80780.2); similar to CCR4-NOT transcription complex protein, putative [Arabidopsis thaliana] (TAIR:AT1G80780.1); similar to unnamed protein product [Vitis vinifer	94.67	150	8	0	1	450	120	269	2e-82	301
MLN2.Contig_138	GGTCTCAACTCAACATTCATTCTCAGAGAGAAGCCGTCTTCCTCTTGTAATCTCTCTCGATCGGACATCTTCTTATCTGCGATTCCAATGTCGAGCCGTTGGTTGAGACCCGAGGTGTATCCGTTGTTCGCGGCCACGGGAGTTGCGGTGGGTATCTGCGCGTTTTCTTTGATCAGAAACATCACCGGCAATCCTGAAGTCAGATGTACCAAGGAGAATAGGGCTGCTGGGATTTTGGATAACCATGCAGAGGGAGAGAAGTACAAGGAGAACTTCCTGAGGAAGTACGTTCGCAACAAGCACCCTGAGATCATGCCTGGCATCAACAAATTCTTCACTGATCCTAAATACTGAACGACCATCTGCACTCTTTTGCTGTTATATTGTTTTCTCGAATTG…	568	5	AT3G48140.1	senescence-associated protein, putative		similar to germination protein-related [Arabidopsis thaliana] (TAIR:AT3G29970.1); similar to HvB12D [Hordeum vulgare subsp. vulgare] (GB:CAA54065.1); contains InterPro domain B12D (InterPro:IPR010530)	94.32	88	5	0	88	351	1	88	3e-45	177
MLN2.Contig_1380	GTCAGTCAGAAAAACGAAAAATTGATCTTCAAAATCGGAATGAGTTCAACTCCGATTTGCTATTCGATCAATCCATCTCCATCAAAGCTCGATTTCACGAGAACCCATCTGCTCACTCCCCTCGCTAAACACTTCTACTCACACTTACCATCCTTCACCGGAAAATTAAGTAACCGTCGGAGGAGTTTGGTCGGAGTAAAGGCGGCGACTTTATCGTCGGAGGAGAAGAAGACAGCGACGGAGAAGAAGAAACCGAGGGTTCTGGTGGCCGGAGGTGGGATCGGAGGACTGGTGTTTGCTCTCGCGGCGAAGAAGAAAGGGTTCGATGTGTTGGTGTTCGAGAAGGATCTGAGCGCTATAAGAGGAGAAGGACAGTACAGAGGTCCGATTCAGATACAG…	605	1	AT5G67030.2	ABA1 (ABA DEFICIENT 1); zeaxanthin epoxidase	Encodes a single copy zeaxanthin epoxidase gene that functions in first step of the biosynthesis of the abiotic stress hormone abscisic acid (ABA). Mutants in this gene are unable to express female sterility in response to beta-aminobutyric acid, as wild	similar to CTF2B, monooxygenase [Arabidopsis thaliana] (TAIR:AT2G29720.1); similar to zeaxanthin epoxidase [Vitis vinifera] (GB:AAR11195.1); similar to unnamed protein product [Vitis vinifera] (GB:CAO71852.1); similar to zeaxanthin epoxidase [Thellungiell	77.16	197	36	2	40	603	1	197	7e-66	246
MLN2.Contig_1381	GAACGCAGAAGAAAGGAAAAGAGGAGAAGAAAAACTCCGTCTTCTCTCTCCGTCACCTTTCACCAGCGTTTTGATCCAGCAGCCATGGCTAATGCGGCTTCGGGGATGGCAGTCCATGATGACTGCAAGCTCAGGTTTCTCGAACTCAAGGCCAAAAGGACTCACCGTTTCATCGTTTACAAGATCGAGGAGAAGCAGAAGCAAGTGGTTGTTGAGAAAGTTGGCGAACCTATTCTATCCTATGAGGACTTTGCTGCTAGCCTCCCTGCTGAAGAGTGCCGTTACGCCATTTATGATTTCGACTTTGTCACTACTGAGAACTGCCAGAAGAGCAAGATTTTCTTCATTGCTTGGTGTCCGGATGTAGCAAAGGTGAGAAGCAAGATGATCTACGCGAGC…	555	1	AT5G59890.2	ADF4 (ACTIN DEPOLYMERIZING FACTOR 4); actin binding	actin depolymerizing factor 4 (ADF4) mRNA, complete cds	Identical to Actin-depolymerizing factor 4 (ADF4) [Arabidopsis Thaliana] (GB:Q9ZSK3;GB:Q94A13;GB:Q9FJE7); similar to ADF1 (ACTIN DEPOLYMERIZING FACTOR 1) [Arabidopsis thaliana] (TAIR:AT3G46010.1); similar to ADF1 (ACTIN DEPOLYMERIZING FACTOR 1) [Arabidop	96.15	130	5	0	112	501	3	132	8e-59	223
MLN2.Contig_1382	CGCCTGAGGTTATCTACAACAGAGAGACAGACCAGAGTCGTGGGTTTGGATTTGTGACAATGAGTACTGTGGAAGAAGCTGAGACAGCTGTTGAGAAGTTCAACCGTTATGATTTGAACGGACGGCTTCTGACAGTAAACAAGGCAGCACCGAGAGGATCACGTCCAGAACGCCAACCTCGGGTATACGAACCTGCGTTCAGAGTCTATGTTGGAAACCTACCATGGGATGTGGACAACGGTCGTCTAGAACAAGTTTTCAGCGAGCATGGCAAAGTCGTGGAAGCTCGTGTGGTCTACGACCGTGAGACTGGTCGTTCACGTGGGTTCGGGTTTGTCACAATGTCTAACGAGACTGAACTCAACGACGCTATCGCTGCTCTTGATGGACAGAACATGG…	621	1	AT4G24770.1	RBP31 (31-KDA RNA BINDING PROTEIN); RNA binding / poly(U) binding	encodes a chloroplast RNA-binding protein	Identical to 31 kDa ribonucleoprotein, chloroplast precursor (RBP31) [Arabidopsis Thaliana] (GB:Q04836;GB:P92871;GB:Q03394;GB:Q43350); similar to 31 kDa ribonucleoprotein, chloroplast, putative / RNA-binding protein RNP-T, putative / RNA-binding protein	92	150	11	1	6	452	180	329	2e-75	278
MLN2.Contig_1383	GACGACGACGACGACAGGGGGAAGAAAATGCCGGTGAGAGTTGTGGAGAGCAACGCGGCTCCCCAGGTTTCAGGAAATGATCCTGGGAATCGATCACCACTTCCGCCTAGCTCACTTCTCGCCGCCGGCCAGGCGTTTTCTGGTACGCAAAATGTTTCTAATCAACAGAAGGAGGAAGCTTGGAGAGTCAACGTCCAGATACAGGGAGTTGATCTTGAACATGGCTATCTTTGTGGCACTATGGAAGCTCTAAACGTTCCCATGGCAGACACTCCTGTCATAACATTCTGGGAAGGGGAAATTGTTGATGGAAAGAATTATACTTTTTACACCGGAAAATGGGAAGCCACGAGGGAAGATGATATGAGACATTGGTCTAAGTTCCCATCTTTTGCACCT…	585	1	AT2G37680.1			similar to hypothetical protein [Vitis vinifera] (GB:CAN77671.1)	94.09	186	11	0	28	585	1	186	5e-96	346
MLN2.Contig_1384	GACATGATGATAAACACGGTGGTGCTTACGGTTACCCGCAGGCAGGTGGATATCCGCCACCTGGCGGACCCGGTGGGTATCCTCCAGCTGGGCCAGGTGGGTATCCGCCACCAGGTGCATACCCGCAAGGTGGATATCCGCCTCCACAGCAAGGTGGATACCCGGGTTATCCACCACAAGGTCCTGGTTATGGATATCCTGGTTATCCACCACAGGGTCCGTACGGTTACCCGCAACAGCAAGCAGCTTATGGTAAACCGCAGAAACCGAAGAAGCATGGAGGAGCGGGTATGGGTCTAGGACTTGGGCTTGGAGCTGGGTTGTTGGGTGGGTTGCTTGTTGGTGAAGCGATTGATGACATGGCTGATATGGGTGACATGGGTGGCGACTTTGACTTCT…	548	1	AT2G13680.1	CALS5 (CALLOSE SYNTHASE 5); 1,3-beta-glucan synthase	Responsible for the synthesis of callose deposited at the primary cell wall of meiocytes, tetrads and microspores. Required for exine formation during microgametogenesis and for pollen viability. Highest expression in meiocytes, tetrads, microspores and m	similar to ATGSL03 (GLUCAN SYNTHASE-LIKE 3), 1,3-beta-glucan synthase/ transferase, transferring glycosyl groups [Arabidopsis thaliana] (TAIR:AT2G31960.1); similar to CALS1 (CALLOSE SYNTHASE 1), transferase, transferring glycosyl groups [Arabidopsis thali	32.5	40	26	1	191	307	1695	1734	1.2	29.6
MLN2.Contig_1385	AGATTTTGTGAGAATCCCATTAGAACAAGCTGGAGGAACGATCAGCCTTACTGATATGTATTACCACTTCAATCGTGCTAGGGGAACAGAGTTGATTTCTCCAGACGATTTGTGGCAAGCTTGTAACCTCTGGGAGAAATTTGATGTTCCAGTAATGGCTGCGGAAGTTTGATAGCGGTGTGAAGGTCATCCAGAACAAGTCCCATAGTGACGAGGAGGTTATGAGTAGAATCAGAATGCTTGTGACTAAAACCGAAACTCTAAGAACCGGAGTCACTGCTAGTGATGCAGCTTTGACACTGAAAATCGCTCCAGCCATGGCCAAGGAACATCTACCATCTGCAGAGACCAAAGGTCTGCTGTGTAGAGACATGAGCCCAGACGGACTTCGATTCTACT…	577	1	AT5G04920.1	vacuolar protein sorting 36 family protein / VPS36 family protein		similar to unnamed protein product [Vitis vinifera] (GB:CAO64568.1); contains InterPro domain Vacuolar protein sorting 36 (InterPro:IPR007261)	94.23	52	3	0	2	157	276	327	4e-78	108
MLN2.Contig_1386	GGCCTTCCATTATTATTATCATCCACTTGCTGAAGATTCCCCACTAGAAAGAAAGAAGCATACGATTCTCTCCTTACCATCCTGCTTCGATTCTCACCAAACATGGAAGCCCTGATTCACCACTTCACTCTCCTCTCCGACCAAGCCCTTGTCGACAAAACATTCGACCCTGCCACGATCGAAGACCTCATGCGTCTCTTCGAAGTCGATTCCTACAAGGCTTGGGCAGCTCTCGAAGCCGAGCAACAACAAGAGCTCGAAGCCGCTGAAGAATCTATCCGCGAAGCCGAAGCTGAACTCGATCGGGATATGGAGTGGGGGATGGAGGAGTACAGGCGGACGTTGGAGGAGATGGAGAGGATGGAGGCGGCGGAGCTTAAAGAGCTTGAGGAGAAGGCG…	613	1	AT1G60870.1	MEE9 (maternal effect embryo arrest 9)		similar to hypothetical protein MtrDRAFT_AC155889g19v2 [Medicago truncatula] (GB:ABN08291.1)	91.84	147	12	0	103	543	1	147	3e-21	98.6
MLN2.Contig_1387	TGTGAATTGTTAATGAAGATGTATGTGCACAGCTTGGTGATGATTGATGATCTACTCTATGTCATATTGTCTTAAACTATGTACTCTAAGGATTTGTCATCTCTTGA	107	1	no significant hit
MLN2.Contig_1388	CAAGATCTCTCATTTTTCCCAGATTCATCTCTTTGTAATCTTTCTCTTCAACTCTAGTTTCATGTTTTACAAAAAAAAAAAAAAAAAAAAACTCTAGTTTCATGCGCGTCTCTCTACTTTCACGACTTTTCATCTCTGCATCTTCTAGAATTCGGAAACGTTTCGGTGTACGGCGCCTTCGCCTGAGCTGGAGCGTGCTCCCCCCCCCCCCTTCCGGATCTCGAGCCACACGATGGAATAGCACCGGCTGCATGTACTGGAGGCACTTCTTCTCTCTCTCTCAGCGAGTCTGATGGTCTCTGTTTCGAAGACCCTAAGAGAGCTCCGTAGTTCTAGTGTCTCAATGGGAGTAAGGCGTGCTCTCTTTAGTTTGAGGACGCAGAGACGTCTCTGATTGTA…	512	1	AT1G71691.2	GDSL-motif lipase/hydrolase family protein		similar to GDSL-motif lipase/hydrolase family protein [Arabidopsis thaliana] (TAIR:AT1G33811.1); similar to unnamed protein product [Vitis vinifera] (GB:CAO16350.1); contains InterPro domain Lipase, GDSL; (InterPro:IPR001087)	68.75	16	5	0	202	249	40	55	8.9	26.6
MLN2.Contig_1389	CAGAAGAGAGAAGCGGCTAGAGAAACCGACAAACGCACCAGCACCAACATCGACTATCAACATGGGTAAAGCTATGGGCTCAGGAACTGGCTTGGGGCGTGCTGGTGCAAATTCTATGAGACCTCCACCAAATCCAATGGTAGCTTCTGGCATGCCCATGGGCGGGGGAATGAATATCGGTGGATATGGAGGTATGAACCAAAACCAACAACCCATGGGCGGTATGGGAATGGGACCAGGCATGAACCAAAACCAACCGATGGGTGGCATGGGAATGGGACCAGGCATGAACATGAACCAAAACCAACCCATGGGTATGGGAATGGGACCAGGCATGAACATGGGAGGTGGATATGGCCAAGGCTATCAGATGCAACCACAACACCAAGGGATGGTACC…	544	1	AT2G43160.1	epsin N-terminal homology (ENTH) domain-containing protein		similar to (EPSIN3), binding [Arabidopsis thaliana] (TAIR:AT3G59290.1); similar to Epsin, N-terminal; ENTH/VHS [Medicago truncatula] (GB:ABN08674.1); contains InterPro domain Epsin-like, N-terminal (InterPro:IPR013809); contains InterPro domain ENTH/VHS (	83.67	49	8	1	2	148	751	798	9e-17	83.2
MLN2.Contig_139	GACAGACGCATCTTTGAACATTGTAACCCTCTCTCAAATCTCAGTTTCAATCTCTCTCCATAACCGATAATGGCTCCCAAGGCGGCAGAGAAGAAACCGGCAGAGAAGAAACCAGCCGAGAAATCCCCGGCGGAGAAGCGACCAAAGGCGGAGAAGAAGATCTCGAAGGAAGGCGGAAGCGAGAAGAAGAAGAAGAAATCGAAGAAGAGCATCGAGACATACAAGATCTACATCTTCAAGGTCCTCAAGCAGGTTCATCCCGACATCGGAATCTCCGGAAAMGCGATGGGGATCATGAACAGTTTCATCAACGACATCTTCGAGAAACTCGCCCAGGAATCTTCGAAGCTCGCTRGGTACAACAAGAAGCCGACGATCACGTCTAGGGAGATCCAGACG…	574	2	AT2G37470.1	histone H2B, putative		Identical to Histone H2B.4 [Arabidopsis Thaliana] (GB:Q9ZUS0); similar to histone H2B, putative [Arabidopsis thaliana] (TAIR:AT3G53650.1); similar to histone H2B-like protein [Solanum tuberosum] (GB:ABB72812.1); contains InterPro domain Histone-fold; (In	96.59	88	3	0	217	480	51	138	3e-42	167
MLN2.Contig_1390	GAAGCGATGGTGTTCTTTATGTCGTATCCGCCGACACGGCGGCAGATGATGGTGTCTGTTGGATTTTTCGCGGCGGGCGTTTCTCTCTTCGCAGCCGGAGCGTATCTCTCACTCGAAAATATAGGACCGCAACAAGCTCGCGTCAAGGCTCGGAACCAATTCGTTAAAGATCGGATCAGGAAATGGCTCGACGATTAGAGATCACAAAATCCATTTGGTGCTGATTCTCGCTGTAATTTTAGATTTTGAAGTGAAGGGTTCTTTAAGGGTTTAGGGCTTGAGCGATTTGAATCTCCAGTTTAATGTTAAATATCGAAAAGCTCGACACGTTAAAGTTTCAAGCTTTTTTGCTTACATATGAAGAATCCATCTTGAGAAAACGAGGGAACATAGAGAATT…	526	1	AT3G11591.1	unknown protein			90.48	63	6	0	7	195	1	63	2e-27	118
MLN2.Contig_1391	GGTTTCAAGCTGTCAGCAAAATGTCTTCATCTTCTCCTTCTTCCTCATAACGAAACAAACAGATCAGCAAAAACAAAAACAAAAAAAAAAGAATCCTAAACATCGTGAGTTCTGAAACAGAACGAGCCATGATTCGTATAATTCAAATAACGATTATTCTCTGTTTCTCCATCGCCGCCGTGATCTCGATCTCCACCGATGACGAGTCTATCTACGAGATCCTCAAGCAGAACGGATTGCCTTCAGGGATATTCCCAAAAGGCGTGACGGAGTTCAACTTCGACGTCAAAACGGGACGGTTCTCTGTTTATCTGAACCGCTCCTGCGATGCCAAGTACGAGGCAGAGCTGCGTTACGAGGCGAACGTTACGGGGACGATAGGTGATTCTCACGTCGCGG…	573	1	AT3G07470.1			similar to unknown protein [Arabidopsis thaliana] (TAIR:AT3G07460.1); similar to unnamed protein product [Vitis vinifera] (GB:CAO17046.1); similar to hypothetical protein [Vitis vinifera] (GB:CAN74376.1); contains InterPro domain Protein of unknown functi	75.54	139	31	1	159	566	11	149	8e-57	216
MLN2.Contig_1392	CGGTTAATGCGGCGGTTAATGCTTATGGAAGTAGTGGGAGTGCGAGTAGCGTTGCGTTTGGTTCTGCAGGAAGACCAGCAGCTTCAATGTTGGCACTGCCCGCGCCACCACCAACGTCCAACGGAAACGGAGGCAGAAGTCTGGTGACCATGGACCCGTTCGCGGCGTCTCTAGAGGTGGTTCCACCGTCGTACGTGCAGATGAGTGATATGGAGAAAAAACAAAGATTGGTAATGGAAGAACAAATGATGTGGGATCAATACAACAGAAATGGAAGACTAGGTCACATGCAAAACCAACAACAACATTTTCATGTTCCATACTTCATGGGACCATATTCTTACACACCTCACTACTGATTCTTTTTGTTTCTTGAAAAAAAAAACGCCATGTATGATC…	532	1	AT4G02650.1	epsin N-terminal homology (ENTH) domain-containing protein / clathrin assembly protein-related		Identical to Putative clathrin assembly protein At4g02650 [Arabidopsis Thaliana] (GB:Q8GX47;GB:O22762); similar to epsin N-terminal homology (ENTH) domain-containing protein / clathrin assembly protein-related [Arabidopsis thaliana] (TAIR:AT1G03050.1); si	69.41	85	22	2	114	356	528	611	2e-28	122
MLN2.Contig_1393	GAGAGAGCGCGGCGGGAGCTTATCCGGAGATAGCCGTGAAAGTGATGGCTAAGATCTGCATTGAAGCTGAAAGCTCGCTTGATTACAACACGATCTTCAAGGAGATGATCAGAGCAACTCCTCTTCCTATGAGTCCGCTTGAGAGTCTTGCATCGTCAGCTGTAAGGACTGCTAACAAAGCGCATGCGAAACTCATTATTGTGTTGACGCGTGGAGGCTCAACGGCCAACCTTGTGGCTAAATACAGGCCTGTTGTTCCGATCCTGTCGGTGGTTGTTCCGGTTATGACGACAGATAACTTTGACTGGAGTTGTAGCGACGAGTCGCCTGCGAGGCACAGTCTGATATACAGAGGGTTGATCCCTCTGTTGGCTGAAGGATCCGCAAAGGCCACCGATA…	556	1	AT5G08570.1	pyruvate kinase, putative		similar to pyruvate kinase, putative [Arabidopsis thaliana] (TAIR:AT5G63680.1); similar to pyruvate kinase, putative [Arabidopsis thaliana] (TAIR:AT4G26390.1); similar to pyruvate kinase, putative [Arabidopsis thaliana] (TAIR:AT5G56350.1); similar to pyru	95.48	177	8	0	3	533	334	510	7e-83	302
MLN2.Contig_1394	GATAGACAATTCTCACAAAGCAATTTTCCATTTTACAAACAAAAAAGCAAAGCAAGCGTTTCTCTGATAGATATTTGCAATTAATTAAAAAGAAAAGAAAAGATGAGTTCAAGGAGCAAAGCATGGTTAGTGGCAGCAACCATTGGAGCTGTGGAGGCTTCCAAAGACCAATTAGGTCTATGCAGGTGGAATTACATGATCCGATCGGTGAATCAACGTATCCGAAATAATGTGAGATCTGCTACTCAGGCGAACAGGCTTCTTCTTCGTCCACCACCGTCGTGTCTTCCGGTAAAGATGGTGACAAGGCCAAGCAAGCTGAGGAGTCTCTCAGGACAGTCATGTACTTGAGCTGTTGGGGTCCTAATTGATGACGATGGATCAAAGATTGGATCCGAC…	566	1	AT4G10270.1	wound-responsive family protein		similar to wound-responsive protein, putative [Arabidopsis thaliana] (TAIR:AT4G10265.1); similar to unnamed protein product [Vitis vinifera] (GB:CAO41250.1)	83.33	24	4	0	297	368	67	90	8e-25	48.5
MLN2.Contig_1395	GGAACCATCCCCAGCAACAGCAGCAGCAGCAACAACAACTCCTCTATCAACACCAATTACAACAGAGACAGCAGCAGATGCTTCTATTACAGCAGTTGCAGAAACAGCAACAACAACAAGCCGCCATGTCTAGATTCCCTTCCAACATCGACGTCCATCTCCGCCCCCCAGGGTCAATCCAGACCCGACCAATTGTTCCCCCTCAGCAGCAGAACCCTAATCCCAACCCTAGCTTGGGACAACCTACACCGAATCTCCAGCAGCAGCAGCAGCAGCAGCAGCAACAGGTTGCAGCGAGTCAGCAGATGCTCCAACAGCAGCAGCAACAACAGCAGCAGAAACTGATGCGTCCGTTGAATCACGTCGAGCTTCAATTCGCTTATCAGGACGCTTGGCGTG…	537	1	AT5G17510.1	electron carrier/ heme binding / iron ion binding		similar to unknown protein [Arabidopsis thaliana] (TAIR:AT3G03460.1); similar to unnamed protein product [Vitis vinifera] (GB:CAO62087.1); contains InterPro domain Cytochrome c and b562; (InterPro:IPR010980)	78.07	114	25	1	120	461	52	162	6e-29	123
MLN2.Contig_1396	GCGTGAAGAGTAAAGGAGGCGACGCATCGCACACCTTCATTCTCTCTTTCTCCGCCATGACCAGCTCTTCCGCTCCCTCACGCAAGGCCTTAAGCAAGATCGCGTGCAATAGGTTGCAGAAAGAGCTTACCGAGTGGCAATTAAATCCTCCCACTGGATTTAGGCACAAAGTTACCGACAATCTTCAAAAATGGATAATCGATGTGACCGGAGCTCCGGGGACGCTCTACGCGAACGAGACTTACCAGCTTCAGGTTGAATTTCCCGTTAATTACCCTATGGAAGCGCCCCAGGTTATTTTTGTTCCTCCGGCACCGTCACACCCACATATTTACAGCAACGGACATATTTGTTTGGATATTCTATATGACTCGTGGTCACCTGCAATGACTGTGAGTT…	560	1	AT1G45050.1	ATUBC2-1 (ARABIDOPSIS THALIANA UBIQUITIN-CONJUGATING ENZYME 15); ubiquitin-protein ligase	member of ubiquitin-conjugating E2-proteins	Identical to Ubiquitin-conjugating enzyme E2-18 kDa (UBC2-1) [Arabidopsis Thaliana] (GB:P42743;GB:O48952;GB:Q9MAK4); similar to UBC18 (UBIQUITIN-CONJUGATING ENZYME 18), ubiquitin-protein ligase [Arabidopsis thaliana] (TAIR:AT5G42990.1); similar to hypoth	94.08	152	9	0	81	536	9	160	2e-85	311
MLN2.Contig_1397	GAGAGAACCCAAGAAACCTTCTCAAATCCTCTAAAGAAAAGAAATGGCCTCCACAGCTATCTCAAGCGTCATCGTCGGAACATCCTTCCTCCGCCGTCAAACATCTCCCATCAGCCTCCGTTCCCTCCCCTTAGCCAACACTCAGACCCTCTTCGGCCTCAAGTCAGGAACCGCTCGTGGTGGACGCGTCACAGCCATGGCTACATACAAGGTCAAGTTCATCACTCCCGAAGGAGAGCAAGAGGTTGAGTGCGACGACGACGTTTACGTCCTCGACGCTGCGGAGGAAGCCGGGATCGACTTGCCTTACTCTTGCCGTGCCGGTTCTTGCTCGAGCTGTGCAGGTAAAGTTGTGTCTGGTTTTGTTGACCAGTCTTACCAGAGTTTCCTCGATGATGA…	550	1	AT1G60950.1	FED A (FERREDOXIN 2); 2 iron, 2 sulfur cluster binding / electron carrier/ iron-sulfur cluster binding	encodes a ferredoxin gene	Identical to Ferredoxin-1, chloroplast precursor (PETF1) [Arabidopsis Thaliana] (GB:P16972); similar to ATFD1 (FERREDOXIN 1), 2 iron, 2 sulfur cluster binding / electron carrier/ iron-sulfur cluster binding [Arabidopsis thaliana] (TAIR:AT1G10960.1); simil	89.19	148	16	0	44	487	1	148	6e-62	233
MLN2.Contig_1398	GACAGTTTGCTACCTACCAAACATCTCATCGAGATGGTGAAGCCTTCGTCGGCTGGCGGTGGAACAAACCTCGCTTCATGCGCCGTCGCCGCCGTATTCATCGTCTTTGCTATCATAGCCGCGGTTACAGTTTACCTAACCGTCTTCAGACCAAGAGATCCAGAGATCTCCGTCACAAACGTCAAGGTCCCGTCGTTCTCCGTCGCCAACAGCTCCGTCAGCTTCAGCTACTCCCAACTCTCCTCCGTCAGAAACCCAAATCGCGCGGCGTTCTCTCACTACAACAACAGAATCGAGCTCTTCTACTACGGGAACCGGATCGGTTTCATTTTCATACCCGCTGGTGAGATCGAACCGGGTCAGACGAAGAGGATGGACGCTAGTTTCTCCGTGGATTCG…	626	1	AT4G23930.1			similar to proline-rich family protein [Arabidopsis thaliana] (TAIR:AT1G64450.1); similar to unnamed protein product [Vitis vinifera] (GB:CAO69529.1); contains InterPro domain Harpin-induced 1 (InterPro:IPR010847)	74.87	187	47	1	64	624	6	179	5e-46	180
MLN2.Contig_1399	GGTCCATCTTCTGACCAGATCATTTGTCTTAAACATAAACAGGACGTGTTCAAGTGTCAGATATTTCGAGAAGAAGAAGAAGAGATGGAGAGGGAGCCGACAAGAGTGATGGTGGCTGTGAATGAATCGACGATCAAAGGGAAGCCCCACCCTTCGATAAGCAGCAAAAGAGCTTTCGAATGGACTCTGGAGAAGATGATCCGATCCAACACATCCGATTTCAAGATTCTCTTGCTCCATGTACATGTGGTCGACGAAGACGGTTTTGATGAGGTAGACAGCATATATGCCTCTCCCGATGATTTCAAAGAGTCTAACAAGTCTAAAGGTCTTCACCTTCTCGAGTTTTTCGTTAAAAAATGTCATGAGATTGGGGTTAGTTGCGAGGCATGGATCAAG…	616	1	AT3G01520.1	universal stress protein (USP) family protein		Identical to Universal stress protein A-like protein [Arabidopsis Thaliana] (GB:Q8LGG8;GB:Q940U0;GB:Q9SSA2); similar to universal stress protein (USP) family protein [Arabidopsis thaliana] (TAIR:AT5G14680.1); similar to universal stress protein family pro	84.8	171	23	1	97	600	5	175	1e-81	298
MLN2.Contig_14	GTKCCGACACGATCTAATAATCTCTCTTCAGTTTTCGAAAAAGCCTTCTTAAATCCTTYTAAAGATTCCTTTATCTAAGAATAAAGAAGAAATTTAACCAAAAGAGATGTGTTATCTGAACAAGGTTTGGATYGCAGCATCGTTCGTGKCTGCTCAAGGAAACCCCGATCACGGCGTCAAGTTGAAAACCGGTCTCAGCTCCGCACACCACCTTCAACGCCGGCTTTCCTCCGATATCCGCCCTCTCTCCGCCACAGCTGACCCCGTAGATGGTCCGCGTGTAGARGAAAGACGGGTTACCTCTTCTTCCACTCCCGATGAATCTCTCCGTCAGATCATGTACCTCAACTGCTGGAGCCAAGGCTAATTCTAGTTCCATGCAATCCATCCRYGGATATT…	556	2	AT4G28240.1	wound-responsive protein-related		similar to wound-responsive protein-related [Brassica rapa] (GB:ABV89634.1)	74.42	86	22	0	107	364	1	86	7e-31	130
MLN2.Contig_140	GAAATCAACCTTTATTAAAACAGAGCTCACTCTCTCTCTCCCTCTCTAGCTCCAATGGGCTTCCCCGTAGGCTACACAGAGGTCTTCCTCCCGAAGCTCTTCGTACAAACACTCTCAATCCTCAGTTTCATCAGAACCGTCGTCTTCTCCCTCTTCCGCTTCTTGGGCCTCTCCGACTTCCTCGAAATGGACCAAACCTGGCCCGACTACACATCTTAYCCGACCCGAACACCCGAGCTCCGCTCCCCCTTCTCCGCCCTCCYCATCCGCGAGATCTTACCCGTCATCAAGTTCGAAGACGTGACGACCTCCTCCGGCGAAGATCTGCCGGAGAGCTGCGCGGTCTGCCTCTACGAGTTCGAAGGAGAGCAAGAGATCCGGTGGCTGAGAAACTGCAGA…	751	3	AT3G61460.1	BRH1 (BRASSINOSTEROID-RESPONSIVE RING-H2); protein binding / zinc ion binding	Encodes a novel ring finger protein and forms an N-terminal hydrophobic domain and a C-terminal RING-H2 signature. Expression is down regulated by brassinolide.	similar to zinc finger (C3HC4-type RING finger) family protein [Arabidopsis thaliana] (TAIR:AT5G41400.1); similar to unnamed protein product [Vitis vinifera] (GB:CAO39675.1); contains InterPro domain Zinc finger, RING/FYVE/PHD-type (InterPro:IPR013083); c	91.91	173	14	2	55	573	1	169	8e-93	336
MLN2.Contig_1400	CCAGTGCGACTTGCCCGTGAGCTCCTACAAGAACCAAGCGATGGGTCTCCTATGTTGAAGCGGTCTTGAGCTCTCTAAAGCATCCATCCACCACCCCCATGGAAATATCACTGTGGAAGCAGAATCGAGTATTTGTCTGAAAATTTCCATCTTCTGAGTATATTCTTTGGGTCTAGAAATGTATAAAAGATCTGAATTTAAGTGAGAACCCATGGTAGTAGTGAGTTTAGACATTATGATGTGAACTTGTTTGACAATATTTGTGTTCCATTTTCTCCTGAAGACAACTCTTTATGTTCTCTGAGTTCACACTTCTGATTTGTATGTCATACATTATGAAATCTGCGATGCTGTTAATTAGTATTCAAATATTGTGATCAATTTAAGACAGTTGTTTGG…	421	1	AT5G47310.1			similar to unknown protein [Arabidopsis thaliana] (TAIR:AT4G17486.1); similar to hypothetical protein 25.t00041 [Brassica oleracea] (GB:ABD64953.1); contains InterPro domain Protein of unknown function DUF862, eukaryotic (InterPro:IPR008580)	68	25	5	1	1	66	221	245	0.14	32
MLN2.Contig_1401	TGAGGTTAACCTCTTGGATGATCATTTGGTTGATGTTCTTCTTGATTCTGCTGCTTCAGGTTGGAACACTGTTGAAAGAGAAGGGATTTCCATCTCTCACCCGGCTCGGTTTATCCTCATTGGCTCAGGGAATCCGGAGGAAGGAGAGCTTAGACCGCAGCTTCTCGATAGGTTTGGTATGCACGCGCAAGTAGGCACAGTTAGAGACGCTGAGCTGAGGGTCAAGATTGTGGAAGAGAGAGCTCGTTTTGATAGTAACCCAAAGGAGTTTCGAGAGTCTTATCTAGAGGAGCAGATGAAGCTTCAGGAGCAGATTACGAGCGCGAGAAGCAATCTTTCTGGAGTTGAGATCAATCAAGATTTGAAAGTGAAGATCTCGAGGGTCTGCGCTGAGCCTGA…	555	1	AT5G45930.1	CHLI2; magnesium chelatase	encodes a second Chl I gene (CHLI2), a subunit of magnesium chelatase which is required for chlorophyll biosynthesis. Protein not detectable in wild type and is targeted for rapid degradation in vivo.	similar to CHLI1 (CHLORINA 42), magnesium chelatase [Arabidopsis thaliana] (TAIR:AT4G18480.1); similar to unknown [Populus trichocarpa] (GB:ABK95697.1); contains InterPro domain Magnesium chelatase ATPase subunit I; (InterPro:IPR011775); contains InterPro	92.39	184	14	0	2	553	220	403	5e-79	290
MLN2.Contig_1402	ACAGCCTTGGGTCAAAGGCTGGGATGATTTCAAGAGAGGCCGTGATGCTCCGATATCAGGGAACCAGTAAAATAAAATAAAAACACTACTTACGAAAGTAACAAATTTCCAAAAAGAAAATACGTTTATATAAAAAGTATCTTTACATAGATACCGAGTAGTCTTTACCTTTTACTATTGTATGAATAAAGCGTGAGAGTATATAATGCGTCTCAGAAGTAAGGTTGAGAGAGTGAATTACAGGATGTCTTGCTTGTCGAAGTTCTTGATATATAAATACAGGTATCAAGGGATTGCGTTTGTTG	305	1	AT5G51040.2			similar to unnamed protein product [Vitis vinifera] (GB:CAO23083.1); contains InterPro domain Protein of unknown function DUF339 (InterPro:IPR005631)	95.45	22	1	0	2	67	163	184	3e-08	53.5
MLN2.Contig_1403	TGACGCAAGAGTTATATATACCTTGCCCAATCCACTCCGATTGGGAATTGACTAAGCGGGTATTTTTTCCACATTCATAGGAGTTCGTCTATGTTTCTGCTTTACGAATATGATATTTTCTGGGCATTTTTAATAATATCAAGTGCTATTCCTGTTTTGGCATTTCTAATTTCCGGGGTTTTATCTCCAATTACGAAGGGGCCGGAGAAACTTTCTAGTTATGAATCAGGTATAGAACCGATCGGGGATGCTTGGTTACAATTTAGAATCCGTTATTATATGTTTGCTCTAGTTTTTGTTGTTTTTGATGTTGAAACCGTTTTTCTGTATCCGTGGGCAATGAGTTTCGATGTACTAGGGGTATCCGCTTTTATAGAAGCTTTCATTTTCGTGCTTATC…	486	1	ATCG00440.1		Encodes NADH dehydrogenase D3 subunit of the chloroplast NAD(P)H dehydrogenase complex	Identical to NAD (ndhC) [Arabidopsis Thaliana] (GB:P56751); similar to NADH dehydrogenase D3 [Crucihimalaya wallichii] (GB:YP_001123467.1); similar to NADH dehydrogenase D3 [Lepidium virginicum] (GB:YP_001123642.1); contains InterPro domain NADH-ubiquinon	98.33	120	2	0	91	450	1	120	3e-56	214
MLN2.Contig_1404	GCTCATACGTTTCCTTTTCTTCTTTCACAATTTTTAATTCATTCATTGTTGATTCGTTCAGAGAAACTCATACGTCAAGATGTCTTCATCCAACGGAGTCTTCGCTCATCAGAGAAACGCGCATCGTAACGGTGGAAGAACCATGTTGAAGAGACCAATCGACAACCGCGGATGCAGAATCGGAGGTTTCCAGGAGGAGGAGGAGCGAAGCCGTTACGCCCCGCCTCAGAAACGCCCCAGATATCATCAGGCGCAACCGCAATTCCAATCGGCGAAACCTGCCAACGGCGGGACTCCTATGTATCGTCATCATCATCATGATAGTAACTTGTCTAGGGTTTCTAATTGCGGTGATGTGATCAATTCTAATTCAAGTAATGTCTTTCCTTTTGCCT	395	1	AT1G66500.1	zinc finger (C2H2-type) family protein		similar to S-locus protein-related [Arabidopsis thaliana] (TAIR:AT5G43620.1); similar to S-locus protein 4 [Brassica rapa] (GB:BAA85453.1); contains domain PTHR15921 (PTHR15921)	53.77	106	40	8	86	376	2	96	2e-15	77.8
MLN2.Contig_1405	AGATGATTGCGGTGAATGCTTAATCTGCTTAGAGGAGTTCCATATTGGACATGAGGTTAGAGGTTTACCTTGCGCCCATAATTTCCATGTGGAGTGCATAGACCAGTGGCTGGCGTTTGAACGTGAAATGTCCTCGGTGCCGGTGCTCAGTCTTTCCAGACCTCGATCTCAGCGCATTATCCAATCTCCAGAGCTCATCAACACAACAGCCCCCACAGGGGAACACGGAAACAACAGAAGCTCGGTACATAAGAAGCCAACCACAAAGCGAGAGCTACTTCCTGAGACTTCAGTCTCTAATTCACCCGGTCCATACTGACACCGCTCTGGAGACTGCAGAGAACGGTGGAGTTCCTCCTGTCTTGGCTGGTCGATCTCCATCTGGGAGATGAGAGACAT…	562	1	AT3G47990.1	zinc finger (C3HC4-type RING finger) family protein		similar to protein binding / zinc ion binding [Arabidopsis thaliana] (TAIR:AT1G12760.2); similar to protein binding / ubiquitin-protein ligase/ zinc ion binding [Arabidopsis thaliana] (TAIR:AT1G12760.1); similar to unnamed protein product [Vitis vinifera]	100	37	0	0	2	112	230	266	7e-62	90.9
MLN2.Contig_1406	GGAGAGATCTTTCTCCCAATCATGGCCGGAGCTGAGGAACGAAGGAGGAGGAGTAGGACCCAAGATGAGGAGGAGTAACAGCAATGTGAGCTGGAGGAGCTCCGGGGGAGGATCGTCCAGGAATAATAAGAGTTGGAGGAATTCTTCCAAGGATGCAGACAACGGAATGTTGAGGTTTTATTTGACACCGAGTTGGAGGAATGGCGGCAGTGGTGGTGGTGGCGGTGGCAGTGGCTGGGAGAAGACTGCGCCAGGGCAAATAGTCACGGTCACTCTATAGCCAGGAGAGTCATGAGGCTCTATTGACCACCTGACAATTTCCCTCTTCATTTTTATTTTTAAATATTGAGCTTATTATATGTATTCTGAGTTCTAAACCGATGATTCCTATTCCAGAAT…	476	1	AT5G01170.1	glycine-rich protein		similar to glycine-rich protein [Arabidopsis thaliana] (TAIR:AT3G09070.1); similar to unnamed protein product [Vitis vinifera] (GB:CAO15781.1); contains InterPro domain Protein of unknown function DUF740 (InterPro:IPR008004)	94.44	18	1	0	250	303	551	568	8e-12	38.9
MLN2.Contig_1407	TGGACATGACTATGCCTTTGATGCTTGACTGGGTCCTTGGTGGTAACAGTGAAAAACTTGAAGGAAGGTCACCTAGTTGCAGACTCACTGACAAAGCTGATGACCGCCTTCGTCAGTGGTTTGAAGACGACGAGGCTCTTGAACGTACTATAAAGGGAGAGTGGTATCTTATTCCACATGGCAACAAGGGTAGCGTTTCGGAAACGTTATGTCTAACCAAAGATGAGGATCAACCTTGCATTATCGGAAGTGAACCGGACCAAGATGTTTCTGGAACCCACATTATGATCCGTTCCCCTCAGGTATCGAAGATGCATGCACGTGTAATCTACAAAGATGGAGCTTTTTTTTTAATGGATCTTCGAAGTGAACATGGGACCTATGTGACCGATAACCAAG…	643	1	AT5G67030.1	ABA1 (ABA DEFICIENT 1); zeaxanthin epoxidase	Encodes a single copy zeaxanthin epoxidase gene that functions in first step of the biosynthesis of the abiotic stress hormone abscisic acid (ABA). Mutants in this gene are unable to express female sterility in response to beta-aminobutyric acid, as wild	similar to CTF2B, monooxygenase [Arabidopsis thaliana] (TAIR:AT2G29720.1); similar to zeaxanthin epoxidase [Vitis vinifera] (GB:AAR11195.1); similar to unnamed protein product [Vitis vinifera] (GB:CAO71852.1); similar to zeaxanthin epoxidase [Thellungiell	82.45	188	33	0	3	566	480	667	7e-89	323
MLN2.Contig_1408	ATATGTGATTTCGTCAACAACTTCTTCATGTGTGATGAATGCCGACTTCATTTCAACGACATGTGCTTAAGTGTAAAGACTCCATTCAAAAAGGCACGTGACTTCGTCTTGTGGGTGTGGAGCACGCACAACAAGGTCAACGAGAGACTCATGAAGGACGAAGCTTCTCTCGGTAGTGGTGACCCCGAGTTCCCCAAGATCATATGGCCACCGAGGGCCCTTTGCCCATCCTGCTATCTCTCGAGTGACGAGAAAAGCATAGAGTGGGACCACGACAATGTCTACAAGTTCTTGAAGAGTTACTATGGCCCCAAGCTCGTCTCCCTTTACAAGGAAAAGAGTGTCGTGGGGAGCAAGGAAGAGACCGTCTCAGCCACCGCGGAAGACTTGACAGTAGCC…	553	1	AT2G01270.1	ATQSOX2 (QUIESCIN-SULFHYDRYL OXIDASE 2); thiol-disulfide exchange intermediate	Encodes a protein disulfide isomerase-like (PDIL) protein, a member of a multigene family within the thioredoxin (TRX) superfamily. This protein also belongs to the quiescin-sulfhydryl oxidase (QSOX) family, which possess an Erv1-like domain at the COOH	similar to ATQSOX1/QSO2 (QUIESCIN-SULFHYDRYL OXIDASE 1), thiol-disulfide exchange intermediate [Arabidopsis thaliana] (TAIR:AT1G15020.1); similar to ATQSOX1/QSO2 (QUIESCIN-SULFHYDRYL OXIDASE 1), thiol-disulfide exchange intermediate [Arabidopsis thaliana]	90.7	172	16	1	1	516	324	494	3e-92	333
MLN2.Contig_1409	GGTTGCTGGGTGGTTTCTAGAACATGCAGAGCCATTGCTTAAGGTGACTATAGTGCCTCGTGGCACAGCAGCGCTTCGGTTTGCTCAGTATGTTCCAAATGAGAACTTGCTCATGACCAAAGAACAACTCTTCGACATGACTTGCATGACTCTCGGCGGCCGTGCAGCTGAACAGGTATTGATAGGAAGAATCTCGACCGGTGCTCAGAACGATCTGGAGAAGGTGACCAAGATGACGTACGCACAGGTGGCAGTGTACGGTTTCAGCGACAAGATAGGACTACTTTCGTTCCCGCAACGAGAAGAGGAGTTCTCAAAGCCATACAGCAACAGAACCGGCGCGTTGATAGACGAAGAGGTTCGAGAGTGGGTGGCCAAAGCTTACAAGAGAACAGTCGA…	614	1	AT1G07510.1	FTSH10 (FtsH protease 10); ATPase	encodes an FtsH protease that is localized to the mitochondrion	similar to FTSH3 (FtsH protease 3), ATP-dependent peptidase/ ATPase [Arabidopsis thaliana] (TAIR:AT2G29080.1); similar to hypothetical protein OsI_019542 [Oryza sativa (indica cultivar-group)] (GB:EAY98309.1); similar to AAA-metalloprotease FtsH [Pisum sa	92.79	208	11	1	2	613	598	805	2e-106	381
MLN2.Contig_141	GACTCTCKACAACATTTGTGGAATAATTAACAATTAACTCTACGATCTTGAAACTATTAGGGTTGATACCATGGGGTTACTAGATCATCTTTGGGATGATACCGTCGCTGGTCCTCTGCCAGAGAACGGCCTTGGCAAGCTTCGGAAACACCATACTTTCAGTTTCCGGCCAAGCTCCGCCAATGATCAATCGGAGGTGAGGTCGTACGGCGGAGATTCACCGGAAGAGGCAGTGAAAGTAACACGAAGCATCATGATAATAAAACCACCAGGTTACCAAAGCGGTTCCGCTCCGGTGTCGCCGGCCGGTTCAACTACACCGGTATCCCCCAGTCCTTTCTCTGAGCAAACGCAGGAGGAAAGGAACCCTTTCGGTTTAGGAGAAGGTCGGCATCGGAC…	585	2	AT1G56220.3	dormancy/auxin associated family protein		similar to dormancy/auxin associated protein-related [Arabidopsis thaliana] (TAIR:AT1G54070.1); similar to unnamed protein product [Vitis vinifera] (GB:CAO17488.1); contains InterPro domain Dormancyauxin associated (InterPro:IPR008406)	82	100	9	3	71	343	1	100	2e-45	156
MLN2.Contig_1410	GAAATATCGTTCTTCAAAAATGGTGTATGTCAGGGAGTTGCTTTCAAAGATCTTTTTGGCGGTCGTTACTACCCTGCTGCCTCAATGTACACTCTCCCCGACCAGCCAAACTGTGTTGTGAAGTTCAATTTTGGCCCTGATTTCGAGTTTTACCCTGAGGATTTTGGTGAGCGTGCAACCCCGAAGCCATGTGGGAGGTTCCGTATCATGGATTCAATGGTAAACCTGAAAACGATGGTTCTGATGATATGAAGAGTTAGGTAGACCAAGCAGGCGTAATCTTAACATTTTTAACATAGTTTTTTTCTAAAAATCTAGTCATTGGTTCAGATACGATTGTATGAGTAGCAAATGATACTCTGGAAACTAGCATTTTTCTTACTTTCAGAACTTTATGTT…	487	1	AT1G51450.1	SPla/RYanodine receptor (SPRY) domain-containing protein		similar to unnamed protein product [Vitis vinifera] (GB:CAO21886.1); contains InterPro domain B302, (SPRY)-like (InterPro:IPR001870); contains InterPro domain SPla/RYanodine receptor SPRY (InterPro:IPR003877)	84.13	63	10	0	1	189	424	486	2e-28	121
MLN2.Contig_1411	CACAGTCATGGTCATGGACACAGCCATGGTCATGACCATAACAATCACGGTGGGGTGACTGTTACCACCCATCACCATCATGGTCATACTCATGGTGAGGACAAGCATCACTCTCATGGTGATGTTACTGAGCAGTTGCTAGACAAATCAGAGAAGAGGAAGAGGAACATCAATGTGCAAGGAGCTTACCTCCACGTCCTTGGAGACTCAATCCAGAGCGTTGGTGTTATGATTGGAGGAGCCATCATTTGGTACAAGCCGGAGTGGAAGATAGTTGATCTGATCTGCACGCTTGTCTTCTCGGTTATTGTCTTGGGGACAACCATCAACATGATCAGAAGCATTCTCGAGGTGTTGATGGAGAGTACACCTAGAGAGATTGACGCTACGAAGCTGGAA…	635	1	AT2G46800.2	ATMTP1/MTP1/ZAT1 (ZINC TRANSPORTER OF ARABIDOPSIS THALIANA); zinc ion transmembrane transporter	Encodes a member of the zinc transporter (ZAT) and cation diffusion facilitator (CDF) families. It is expressed throughout the plant, especially in dividing, differentiating and expanding cells. The protein is localized to the vacuolar membrane. Mediates	Identical to Metal tolerance protein 1 (MTP1) [Arabidopsis Thaliana] (GB:Q9ZT63;GB:O81036); similar to MTPB1, efflux transmembrane transporter/ zinc ion transmembrane transporter [Arabidopsis thaliana] (TAIR:AT2G29410.1); similar to heavy metal transport	91.91	173	7	1	97	594	226	398	5e-86	313
MLN2.Contig_1412	GTTCTTCACGGTTTACGGTCCGTGGGGTAGACCGGACATGGCTTACTTCTCATTCACGCGGAATATTCTCCAAGGTAAACCGATCACGATATACCGGGGCAAAAACCGGGTCGATTTGGCCCGGGATTTTACTTTCATCGACGATATTGTCAAAGGATGTTTAGGATCTCTTGACTCGTCGGGTAAAAGTACCGGGTCGGGTGGGAAGAAACGTGGAGCCGCACCGTACCGGATCTTCAATTTAGGGAACACGTCACCGGTTACGGTTCCCATCTTGGTGGATATATTGGAGAAGCATCTCAAGGTGAAGGCGAAGAGGAACTTCGTGGAGATGCCTGGAAACGGCGACGTTCCGTTCACGCACGCTAATATTGGTTCCGCCCGGAGAGAGTTCGGGTA…	538	1	AT4G30440.1	GAE1 (UDP-D-GLUCURONATE 4-EPIMERASE 1); UDP-glucuronate 4-epimerase/ catalytic	UDP-D-glucuronate 4-epimerase	Identical to UDP-glucuronate 4-epimerase 1 (GAE1) [Arabidopsis Thaliana] (GB:Q9M0B6); similar to GAE2 (UDP-D-GLUCURONATE 4-EPIMERASE 2), catalytic [Arabidopsis thaliana] (TAIR:AT1G02000.1); similar to Os02g0791500 [Oryza sativa (japonica cultivar-group)]	98.16	163	3	0	2	490	266	428	1e-79	292
MLN2.Contig_1413	GAAGAGCATGAGCACGGAGACGAGGCTTCTCATCGAGAGGGAGGTGAAGCTTCTTTTAGAGAAGGCTTATAACAATGCGAGAAACATCCTCACGGTTTATAATAAAGAGCTGCATGCACTTGCGAACGCTTTGCTTCAGAACGAGACTATGTCTGGGAAGCAGATTAAAGAGTTGCTTGCGGATCTCAACTCTCCTCAGATTAAAAAGCGTCAAGAGGTTGCTGCGCAGCAGAGCCAGCCTGTTCCTCCTCCGTCAACTCCTAGCCCTGCTGCGTCTGCAGCCGCCGCGGCTGCAGCTGCGGCTTCTGCGGCCGCCTCGGCTGCTGCAACGGCCGCAACCAAAGGTAAAGACATGGCTCCTGTAGGGTCTTAAAAAAAATAAAGGTGTGTATGCTGTGG…	547	1	AT2G26140.1	FTSH4 (FtsH protease 4); ATP-dependent peptidase/ ATPase/ metallopeptidase	encodes an FtsH protease that is localized to the mitochondrion	similar to FTSH11 (FtsH protease 11), ATP-dependent peptidase/ ATPase/ metallopeptidase [Arabidopsis thaliana] (TAIR:AT5G53170.1); similar to ftsH-like protease [Pisum sativum] (GB:CAG25608.1); similar to putative FtsH protease [Lycopersicon esculentum] (	86.3	73	10	0	2	220	597	669	1e-28	122
MLN2.Contig_1414	GACACCAACAAGATACACTCAACAACAACATCTCCTCGTTCTTTTATCTTCTTCTCCGACATGAAGCTCGCCGCTAGCCTCAAGCGTGTGTTCCGCTCCAAGTCCAAAGGTTCTGTCTCAAGATCCGAACCGTCTTCCTTCAGCTCCGCCGCTTCTTCCTCCTCCTCCGACGGTGGCTCATACGGTAAACTCAAGCCAGGCCCCGCCGCTACACCCGTCAGTGTTCTTCCGCAAAGCTCCGGTGATTTCTACTCCGAGCTGGTCGAAGCGTCTAAGCTGATAGACCGAGACGACGACGGTGTGGTTTCAAGAAAAGATCTCGCGGACCTTCTTAGCAGGCTCAGCCCTGAACCGCCGAGTCCTGAAGAGGTGAGTATGATGCTCAGAGAAGTAGATGCT…	492	1	AT2G41410.1	calmodulin, putative		Identical to Calmodulin-like protein 1 [Arabidopsis Thaliana] (GB:P30188;GB:Q8LFR1;GB:Q9SLG7); similar to calmodulin, putative [Arabidopsis thaliana] (TAIR:AT3G10190.1); similar to unnamed protein product [Vitis vinifera] (GB:CAO23336.1); contains InterPr	75.5	151	30	4	61	492	1	149	5e-31	130
MLN2.Contig_1415	GGAATACGGGTTTAGCCAGCCGAGTAACGACGGTTCTTATGGTCGTGGCTTGTATCTCTCGCCTGATAATGCTCTTCTTGAATGTGTGAAGGGTTCAGCTGCGGAGTCGGAAGATGGGATGAGATTCTTGCTGCTTTCGAGAGTTATACTTGGGAAGTCTGAGGTTGTTCCACGAGGGTCGACTCAGTCCTGTCCTAGCTCTCCAGAGTTTGATTCTGGTGTAGATAATTTATCTTCTCCGAAGAAGTATATTGTGTGGAGCACTCACATGAACACACATGTCTTGCCTGAGTTTCTTGTCTGCCTCAAAACTCCGTTTAATTTCAACAGTCCAAGGAGATTGAGATCGCCATGGATGCCGTTTCCTTTACTGATCAAAGCATTATCCAAGTTCCTACC…	591	1	AT5G62520.1	SRO5 (SIMILAR TO RCD ONE 5); NAD+ ADP-ribosyltransferase	Encodes a protein with similarity to RCD1 but without the WWE domain. The protein does have a PARP signature upstream of the C-terminal protein interaction domain. The PARP signature may bind NAD+ and attach the ADP-ribose-moiety from NAD+ to the target m	similar to SRO4 (SIMILAR TO RCD ONE 4), NAD+ ADP-ribosyltransferase [Arabidopsis thaliana] (TAIR:AT3G47720.1); similar to unnamed protein product [Vitis vinifera] (GB:CAO64333.1); contains InterPro domain Poly(ADP-ribose) polymerase, catalytic region; (In	80.98	184	33	2	2	547	125	308	2e-83	305
MLN2.Contig_1416	GAAGGCAGAGAGAGAGAGAGAGAGAGAGATCCATGGAAGGTCTTCAAAGATCAACCATCTCCTTCCGCCGTCAGGGATCTTCCGGCATAGTCTGGGACGACCGTGTCATCGCCGAGCTTAACAAACAGGCCAACGAGCAGAAAGAAGAAAGTCAACGCGACGAACAGCCTAAGCCGATGTCTGAAACCTCAGAGCAAGCGAAACCGATCGCGGCGATGAGAAAGACAAGCTCAGGCCGATCAAAACCGGTGTTCCAACAAGCGAGAGGAGTCGATCTAACGGCGGAGGAGGCGCACGACATCACAGAACAACCGGAAGAGTGTCTCCTGCGGTGGAGCCGCCGTCTCCGAGGTTGTCGGCATGCGGTTGCTGCTCTGCGTTTGGGAAGAAACCGCCGGG…	606	1	AT1G80180.1			similar to unknown protein [Arabidopsis thaliana] (TAIR:AT1G15400.2); similar to unknown protein [Arabidopsis thaliana] (TAIR:AT1G15400.3); similar to unknown protein [Arabidopsis thaliana] (TAIR:AT1G15400.1); similar to hypothetical protein MtrDRAFT_AC14	68.75	64	16	4	33	212	1	64	3e-23	72.8
MLN2.Contig_1417	TATCTTTGTTTGCTTTGTTTATCAAAGAGCAGCTGAACATTATTGGTGATGAAGGGAAGAAGTGTCGTCTTGGTGTTGTGCAGACGGCTTACGCCAATGGTGCGTCAACGGATTACGTTAAGGAGATGGGTTTAGAGGTTGTTTTTGCGAAAACCGGGGTGAAGCATTTGCATGAGAAAGCAGAAGAGTTTGATGTTGGGATCTACTTTGAAGCTAATGGCCACGGGACTATTCTATTCGCGGAATGTTTCCTGTCTTGGTTAGTTGGTAAGCAAAAGGATTATAGTGAAGGCTCTGATAAGCACAATGCGGTTTCTAGGCTAGTGGCATTGAGTAATCTGATTAACCAAGCGGTTGGTGATGCTCTAAGTGGGTTGCTCTTGGTTGAAGTGATTCTGC…	632	1	AT5G18070.1	DRT101 (DNA-DAMAGE-REPAIR/TOLERATION 101); intramolecular transferase, phosphotransferases	encodes a novel protein involved in DNA repair from UV damage. Isolated by functional complementation of E. coli UV-sensitive mutants (UVR genes).	Identical to Phosphoacetylglucosamine mutase (DRT101) [Arabidopsis Thaliana] (GB:P57750;GB:Q05211); similar to unnamed protein product [Vitis vinifera] (GB:CAO64115.1); similar to unnamed protein product [Vitis vinifera] (GB:CAO63456.1); similar to phosp	81.48	216	34	2	3	632	315	530	1e-88	322
MLN2.Contig_1418	GAAGTTAAGAAATGCAACAAGCGTTAGGGTTCTCGTCGCTGAAAAGCTGCGGCGGAGGAACCCTTTCTATGACGTATGAAGGCTGATAATAATACATCATCCTCTTCATCCCTTCTTCTTCCCACACACGCATCTCTTCCGAAGCCTCCATCTCTTCTCCGTCACCGTCCTCTTCCTTTTCATCTCCCGCCTCCTTCTCCTCTCCTGTTTCTGCGGGTTCCTCACCGCCTTCACCGGTCTCCTCCTTCTTTTCTTCCTCCACCTCAGGTTTTTCAGCTTCCGGGTCGGGTTGGGGTACGATTCGGGCCTGCTTTTTGGTCCGACGGTAGACGTAGTCCACAAGTTTCTCTTCGTCCATCGTCCCAGTCACTATTACTTTTCCGTTGGTGTGCTCCGTCA…	544	1	AT3G26910.2	hydroxyproline-rich glycoprotein family protein		similar to unknown protein [Arabidopsis thaliana] (TAIR:AT5G41100.2); similar to unnamed protein product [Vitis vinifera] (GB:CAO49064.1)	33.33	51	34	1	223	375	493	542	0.54	30.8
MLN2.Contig_1419	CGGAGGGGTTTGAATTAGCCCCCCCCGATCGTATTTCACCCGAGATGAAAGAAAAGATAGGAAATCTGTCTTTTCAGAATTATCGCCCCAATAAAAAAAATATTCTTGTGATAGGTCCTGTTCCTGGTCAAAAATATAGTGAAATAACCTTTCCTATTCTTGCCCCAGACCCTGCTACTAATAAAGATGTTCACTTCTTAAAATATCCTATATACGTAGGTGGAAATAGGGGAAGGGGTCAGATTTATCCTGATGGTAGCAAAAGTAACAATACAGTTTATAATGCTACGGCAGGAGGGATAATAAGTAAAATTTTACG	319	1	ATCG00540.1		Encodes cytochrome f apoprotein; involved in photosynthetic electron transport chain; encoded by the chloroplast genome and is transcriptionally repressed by a nuclear gene HCF2.	Identical to Apocytochrome f precursor (petA) [Arabidopsis Thaliana] (GB:P56771); similar to cytochrome f [Crucihimalaya wallichii] (GB:YP_001123475.1); contains InterPro domain Rudiment single hybrid motif (InterPro:IPR011054); contains InterPro domain C	100	105	0	0	3	317	114	218	4e-58	219
MLN2.Contig_142	GATCGATCACTCTCTACAACATTTGTGGAATAATTAACAATTAACTCTACGATCTTGAAACTATTAGGGTTGATACCATGGGGTTACTAGATCATCTTTGGGATGATACCGTCGCTGGTCCTCTGCCAGAGAACGGCCTTGGCAAGCTTCGGAAACACCATACTTTCAGTTTCCGGCCAAGCTCCGCCAATGATCAATCGGAGGTGAGGTCGTACGGCGGAGATTCACCGGAAGAGGCAGTGAAAGTAAMACGAAGCATCATGATAATAAAACCACCAGGTTACCAAAGCGGTTCCGCTCCGGTGTCGCCGGCCGGTTCAACTACACCGGTATCCCCCAGTCCTTTCTCTGGAGGAAAGGAACCCTTTCGGTTTAGGAGAAGGTCGGCATCGGACSCGT…	769	4	AT1G56220.1	dormancy/auxin associated family protein		similar to dormancy/auxin associated protein-related [Arabidopsis thaliana] (TAIR:AT1G54070.1); similar to unnamed protein product [Vitis vinifera] (GB:CAO17488.1); contains InterPro domain Dormancyauxin associated (InterPro:IPR008406)	73.72	137	26	4	78	458	1	137	4e-46	181
MLN2.Contig_1420	GACCTCAGTAGAAGAAAATGTCGATCATTCCAATCAACGATCGCCGGAGTATCTCTCCCGGCGATAGAATCTGGGAGCCATTCGAACTCATGAACACCTTCTTCGACTTCCCCTCACCTTCTTTCTTCCTCTCTCGCCACTTCCCCTCACTTTCCCCATTCTCTTCACCATCCACCGTCGAAACCCAGCTCAACTGGACGGAGACTCCGACGGCTCACGTTTTCAAAGCGTATCTTCCTGGAACGACTCAGGACGAAGCGATCGTGTTCGTGGACGACGAAGGATACCTCCAGATCTGCGCGGGAGACAACAAGTTCATGAGCAGATTCAAGCTTCCCGACAACGCCCTGAAGGATCAGGTGACGGCGTGGATGGAGGAGGATGGGTTCCTCGTCGTGT…	602	1	AT2G19310.1			similar to HSP18.2 (HEAT SHOCK PROTEIN 18.2) [Arabidopsis thaliana] (TAIR:AT5G59720.1); similar to 18.5 kDa class I heat shock protein (HSP 18.5) (GB:P05478); contains InterPro domain HSP20-like chaperone (InterPro:IPR008978)	71.17	163	42	3	18	491	1	162	1e-46	182
MLN2.Contig_1421	GGGTGACAAATGTTGAGACTACTCATTACATATTGGGATCTGTGGCGGGTCCTCACCCTTACCCGATGATGGTCAGAGACTTTCACGCGGTGATTGGTAAAGAAACGAGGAGACAAGCGTTGGAGAAATGGGGCGGGAAGCCAGATGTGTTGGTGGCTTGTGTTGGTGGGGGTTCAAACGCGATGGGACTCTTCCATGAGTTTGTGAATGACACAGAGGTCCGGTTGATCGGTGTGGAAGCTGCGGGATTCGGAGTGGATAGTGGCAAACACGCTGCTACGTTGACAAAGGGAGATGTGGGTGTTCTACATGGAGCTATGAATTACTTGCTGCAAGATGATGATGGCCAAATCATTGAACCTCACTCCATCAGTGCAGGATTGGACTACCCTGGAGTTG…	567	1	AT4G27070.1	TSB2 (TRYPTOPHAN SYNTHASE BETA-SUBUNIT); tryptophan synthase	Tryptophan synthase beta. Expressed at low levels in all tissues.	Identical to Tryptophan synthase beta chain 2, chloroplast precursor (TSB2) [Arabidopsis Thaliana] (GB:P25269); similar to TSB1 (TRYPTOPHAN SYNTHASE BETA-SUBUNIT) [Arabidopsis thaliana] (TAIR:AT5G54810.1); similar to Tryptophan synthase beta chain 2, chl	95.74	188	8	0	3	566	261	448	4e-104	373
MLN2.Contig_1422	GGCCGCGTCTTTGTGTGTTTATCATCAACACAACAGATCTGATCGCCTTTTAAGTCGTCTCTTCTCCCCCAAACCAAAACAATGGCTGAGGCAACACCAGCTTTGAGGAAGCCTGTGTTCACCAAGGTTAATGAGCTGAGACTTGGAACCAATGGTCACTCATTGAATGTGAAAGTTGTCAGCTCGAAGATGGTGATGCAGAGAGGTGGAGGAGGAGGAGGTCGTCCCAATGGTCCTCAGGCTCGTCAGATGAGGATTGCAGAGTGTCTTGTTGGTGATGAGACTGGAATCATTATCTTTACTGCACGAAATGATCAAGTGGATTTGATGAAAGAAGGCAAGATTGTGACCCTGCGCAACGCCAAGATCGACATGTACAAGGGATCTATGAGGCTTGCG…	608	1	AT1G10590.2	DNA-binding protein-related		similar to DNA-binding protein-related [Arabidopsis thaliana] (TAIR:AT1G23750.1); similar to unnamed protein product [Vitis vinifera] (GB:CAO66056.1); contains InterPro domain Nucleic acid binding, OB-fold, tRNA/helicase-type; (InterPro:IPR004365); contai	90.07	141	14	1	82	504	1	138	2e-64	241
MLN2.Contig_1423	GGGCGAGGTCTCTGGTTCAAATCCAGGATGGCCCAGCTGCGCCAAGGAAAAGAATATAAGAAGGATCTGACTCCTTCATGCATTCTCCACTTGGCTCGGGGGGATATAGCTCAGTTGGTAGAGCTCCGCTCTTGCAATTGGGTCGTTGCGATTACGGGTTGGGTGTCTAATTGTCCAGGCGGTAATGATAGTATCTTGTACCTGAACCGGTGGCTCACTTTTTCTAAGTAATGGGGAAAAGGACCGAAACATGCCACTGAAAGACTCTACTGAGACAAAGATGGGCTGTCAAGAACGTAGGGGAGGTAGGATGGTCAGTTGGTCAGATCTAGTATGGATCGTACATGGACGGTAGTTGGAGTCGGCGGCTCTCCTAGGGTTCCCTCGTCTGGGATTGAT…	479	1	AT5G46470.1	disease resistance protein (TIR-NBS-LRR class), putative		similar to disease resistance protein (TIR-NBS-LRR class), putative [Arabidopsis thaliana] (TAIR:AT5G46450.1); similar to disease resistance protein (TIR-NBS-LRR class), putative [Arabidopsis thaliana] (TAIR:AT4G08450.1); similar to ATP binding / nucleosi	34.09	44	29	0	76	207	879	922	4.6	27.3
MLN2.Contig_1424	CCATTGCCTGCACTTGATCTTCCCCCATCAGGAAGTATGTGGCAACCGCACGGAACTCTGTTATCAATGCAACAGCTATGTTAGATTGCGTGAAACATATAACCATGAAACCAAGTGCCCTGGTTCTGTGCTCAACAATGTTGAATCATCCAGGGTCCCAAGCAGCAGAGGGAGATGGAAACGGCAGGAGGAGAAGAGACAATGGTGTTTCTAACAAAAGGCTGTTCTTCACGATAGCAATAACGGGAATAGCTGTCTTGATAGGATCGCTCTTCTTCCAGAGGAAGCCTGAGGGGAGCTAAGCAGAGAGAGAGAGACGTAACTCGTGTGTTGTCCTGTAAATCTGCTCAAACTCCCTTCCAGACAGATTCAAAAGAAGGGGTTTTATACATTTTAAAT…	493	1	AT1G09920.1	TRAF-type zinc finger-related		similar to PRLI-interacting factor K [Arabidopsis thaliana] (TAIR:AT4G15420.1); similar to unnamed protein product [Vitis vinifera] (GB:CAO61575.1); contains domain PTHR16295:SF10 (PTHR16295:SF10); contains domain PTHR16295 (PTHR16295)	64.29	56	20	0	26	193	105	160	6e-28	82.8
MLN2.Contig_1425	ATGCTCGACCGTATCCTTCGTCTTCTTACGTCTTACTCCATCCTCACCTGCTCCAGTCGTACTATTCCCGGCGGCGACAGCGTCGAGAGGATTTACGGGCTTGGTCCGGTTTGCAAGTATTTGACCAAGAACGAGGATGGTGTGTCCATTGCTGCTCTCTGTCTTATGAACCAAGACAAGGTTCTCATGGAAAGCTGGTACCATTTGAAAGATGCAATTCTTGATGGTGGGATTCCATTCAACAAGGCCTATGGAATGAGCGCTTTCGAGTACCATGGGAAGGACCATAGGTTCAACACGGTATTCAACAATGGAATGTCTAACCATTCAACCATCACAATGAAGAGGATTCTTGAGACCTGTAAGGGTTTCGAAGGACTGACTTCTTTGGTGGATGTT…	608	1	AT5G54160.1	ATOMT1 (O-METHYLTRANSFERASE 1)	A caffeic acid/5-hydroxyferulic acid O-methyltransferase. Interacts with 14-4-3 proteins in yeast 2 hybrid assay. AtOMT1 (At5g54160) encodes a flavonol 3?-O-methyltransferase that is highly active towards quercetin and myricetin. The substrate specificit	Identical to Quercetin 3-O-methyltransferase 1 (OMT1) [Arabidopsis Thaliana] (GB:Q9FK25;GB:O49964;GB:Q42170); similar to O-methyltransferase family 2 protein [Arabidopsis thaliana] (TAIR:AT1G77530.1); similar to O-methyltransferase [Fragaria x ananassa]	91.58	202	17	1	1	606	74	274	2e-107	384
MLN2.Contig_1426	GTCAGGTGCAAGCGAGTGAGACACAAGAGAGTCAGGTGCAAGCGAGTGAGACACAAGAGAGTCAGGTGCAAGCGAGTGAAACACAAGAGAGTCAGATGCAGGCGAGTGAAACACAAGAGTGTCAGGGAAAGCAGCAAGCAAGCGAGTCACAAGAGCAAACGAGCCCGTCTCAGCAAGTCTCTGTACCTCTGAGTCACTCTGAAACAGATCATAATCAGGAAACCAGTCAGGTGGTTGCCAGTCATTCTCAAAGCAGTCCTATAGCTACGGGCCGGTCAGAGACGAGTCAGTCTCAGAGCAGTCCCATTGGTGCGGGGCAGTCTGAAGTGAGTCAGACCACCCAAGTGTCGGACTCGGATCCTCCTCCTCCACCAACGAGCCATACCCAGACATCAGATT…	571	1	AT5G01400.1	ESP4 (ENHANCED SILENCING PHENOTYPE 4); binding	Encodes a Symplekin/Pta1 homologue which would have the potential to interact with either ESP1 or AtCstF64.	similar to unknown protein [Arabidopsis thaliana] (TAIR:AT1G27595.1); similar to unnamed protein product [Vitis vinifera] (GB:CAO50143.1); similar to hypothetical protein OsJ_024678 [Oryza sativa (japonica cultivar-group)] (GB:EAZ41195.1); similar to hypo	49.52	105	53	2	21	335	1249	1333	4e-14	74.7
MLN2.Contig_1427	GAATCGAAGATGGGAGATTCGAGGTCATTTGCGGATGGATTCAAGGGGTTCTGGGAGGAGAGGTTGTCGTTCCTGGAGAATTACACGAGGTTCACCAAACGCGATGCGCCTCTTCCTTCTTGGTCTTCCTCCGACGTCGAGGAGTTTATAGCTTCCGATCCCGTTCATGGACCCACCCTGAAAACAGCTAGGGAAGCTGCGACTTTTGGTGTTACTGGAGCTGCACTTGGAGCTCTATCTACTGCTGCTTTTGCCTGGAGATACTCCTAAGAGTCCACACGGTGGCTGCATTGTCCTTCTTAGGAGGCGGTGTTTTTGGTTGGACCTTTGGGCAAGAAGTTGCGAACCACACCTTGCAGCTCTATAAGCTGGACACAATGGCTGCTCAAGTTAAGTTCA…	553	1	AT1G08480.1			similar to unknown [Populus trichocarpa] (GB:ABK92625.1)	97.87	47	1	0	285	425	96	142	2e-53	101
MLN2.Contig_1428	GATCAACAGCAGCAGCCATAATAACCTAAACACCTTTCCCATTCCAATAGAAAAGAAAACCTTATGGCCTCCAAGGCGCTCTCTTCTTTCACGGCTAAGCCCGCTGTGTCACTGCTCCCCCATGGCGTCTCCTCTGCCTCTCCGTCTGTTACGTCTCTGAGCTTCTCAAGGCATACTGGCGGCAGAGGAGTGGTGGTTGCGTCCTCAACGGTAGACACAACCAATATGCCGATGACAGGAGTGGTGTTCCAGCCGTTCGAGGAGGTGAAGAAAGCCGATCTGGCCATTCCAATCACATCTAATGCCTCCCCCGCTCGCCAGAGGTATGCCGACTCTTGCGAGGCTGCCATTAACGAGCAAATCAATGTGGAATACAACGTGTCGTATGTGTACCATTCA…	572	1	AT5G01600.1	ATFER1 (FERRETIN 1); ferric iron binding	Encodes a ferretin protein that is targeted to the chloroplast. Member of a Ferritin gene family. Gene expression is induced in response to iron overload and by nitric oxide. Expression of the gene is downregulated in the presence of paraquat, an inducer	Identical to Ferritin-1, chloroplast precursor (FER1) [Arabidopsis Thaliana] (GB:Q39101;GB:Q8LG19); similar to ATFER4 (FERRITIN 4), ferric iron binding [Arabidopsis thaliana] (TAIR:AT2G40300.1); similar to Ferritin-1, chloroplast precursor (GB:Q96540); c	80.35	173	30	3	64	570	1	171	3e-66	247
MLN2.Contig_1429	CTCCAGAGTGAAGAGCTCTACAGATATATACTGAAGACGAGTGTGTACCCACGCGAGCCAGAGGCTCTCAAAGAGCTTAGGAGCGTTACTCATAACCATCCTATGGCTAATATGGCTACTGCACCGGACGCTGGCCAGCTAATGGAGATGCTGCTGAATCTTGTAAATGCAAGGAAGACTGTCGAAGTTGGGGTTTTCACTGGATACTCTCTTCTCCTCACTGCTCTTACATTACCAGAAGATGGCAAGGTTATAGCCATTGATGTGAACAGAAGCACATATGAGATAGGGTTGCCAGTCATCAAGAAGGCTGGTGTTGAACACAAGATTGATTTCAGAGAGTCTGAAGCTCTTCCTGTCCTCGACTAGCTTTTAAACCATGAAGAGAACGAGGGTGGA…	657	1	AT4G26220.1	caffeoyl-CoA 3-O-methyltransferase, putative		Identical to Probable caffeoyl-CoA O-methyltransferase At4g26220 [Arabidopsis Thaliana] (GB:Q9C5D7;GB:Q8LBF3;GB:Q9STR2); similar to caffeoyl-CoA 3-O-methyltransferase, putative [Arabidopsis thaliana] (TAIR:AT4G34050.1); similar to hypothetical protein [V	86.3	219	30	0	1	657	10	228	5e-107	383
MLN2.Contig_143	GGATAAGCCCAGCCTCCCTCTCGTTTCACTCTCGAGGAACTCCTTTTCAGTCGAGTTGCTAAAGCACCTCTCCTTACAGTCGAGCTTCTTTGTTCCTTCGGACCTCTCGCCCAAATGAAATAGGATGAATCCAATCAATAAGCTTATTGATTGGATTCAGAGCGCAGCGAAGCCAAATTAAATCAAGGCAAAGGGGGGCTTACTTTTCCTGACGCTGAGTCATCCTATTCAAATTTAGCTATGCTAATAACAGGAAAAGTATTCAGATGATATGGATCCCAAGAGATGAGCGAGAACCTCCAATTGCTTAAGGATCGCACTCCGCTGTCCCGCTTGGTGGACGAGATCTTCTCTCGGGGTCATCCTGGGTTACTGAAGGGTTGTCCGACTGCTCGGTGA…	524	1	AT1G10585.1	transcription factor		similar to transcription regulator [Arabidopsis thaliana] (TAIR:AT1G10586.1); similar to unnamed protein product [Vitis vinifera] (GB:CAO64351.1); contains InterPro domain Basic helix-loop-helix dimerisation region bHLH; (InterPro:IPR001092); contains Int	45.45	33	18	0	259	357	125	157	1.9	28.9
MLN2.Contig_1430	GTGGTCTCCGGGTTGGTGTCCTCTCTCGGTGGTTCTTCTTGTAGAATCAGCTCATCCCAGTGCCGATGTTAGTCTACGGATTCATCGGCAGGGTTGATTCTTATAGCTTCTTCAGGTCTTTAAGAGCGTCATCGGTCCCCGTTTCAGCTGTGTTCTCGGACCCGTCTTCTTGCTTCTCTGGTTGAGGAGTTTTTTTCTTTCTGCTCGGAGCGTCATTATGTTCAGGTCGTTTTCGGGCCTAATAATTGCTCGGTTTCGGTTGCTGTGGGTGTGCTAGACCTCTGCTGTTGCTGTCTGTTCCTGTGGCTTGTGCTATAAAGCCTCGAAGCGAGCTGTTCTAGGATGGGCCATTATCTTTAAGAGCGGATCACCGGGGAGGCCAAAATTACTGGGGTCCCG…	502	1	AT1G69960.1	PP2A (SERINE/THREONINE PROTEIN PHOSPHATASE 2A); protein serine/threonine phosphatase	type 2A serine/threonine protein phosphatase (PP2A) mRNA,	Identical to Serine/threonine-protein phosphatase PP2A-5 catalytic subunit (PP2A5) [Arabidopsis Thaliana] (GB:O04951;GB:Q1EC63;GB:Q42544); similar to PP2A-1 (protein phosphatase 2A-2), protein serine/threonine phosphatase [Arabidopsis thaliana] (TAIR:AT1	37.5	40	25	1	130	249	228	264	3.9	27.7
MLN2.Contig_1431	GGTGGCGTTGAGCGGGGCCCACACCATCGGGTTCTCGCACTGCAAAGAGTTCACCAACCGGGTCGCCCGGGTTAACGATACCGGGTATAACCCGAGATTCGCTGACGCTCTAAAAAAAGCTTGTGCGAATTATCGAAATGACCCTACGATTCCGTCTTCAACGACGTGATGACTCCGAACAAGTTCGACAACATGTACTTCCAGAACATTCCGAAAGGTCTCGGGCTGCTAGAGTCGGATCATGGGTTGTATTCCGATCCGAGAACCCGGCCTTTCGTTGAGCTATACGCGAGCAACCAAGCTCGGTTCTTTAAAGACTTCGCAGGAGCCATGCAGAAGCTTAGCGTCTACGGCGTTTTGACCGGACGGCGAGGAGAGATCCGGCGAAGGTGTGATGCA…	591	1	AT5G40150.1	peroxidase, putative		Identical to Peroxidase 63 precursor (PER63) [Arabidopsis Thaliana] (GB:Q9FL16;GB:P93726); similar to peroxidase, putative [Arabidopsis thaliana] (TAIR:AT3G28200.1); similar to unknown [Populus trichocarpa] (GB:ABK94345.1); contains InterPro domain Plant	84.69	98	14	1	115	405	231	328	3e-42	167
MLN2.Contig_1432	AAGCCACCTCAGCACTCGCCCTTCTACTGGTGGAAGTGTCACTCGAAGTCGACCTTCCACTGCTGATAGTGACAAAGCGCATGATTCTTCTTCTACTTGGGATTCGACCTCCCGGCCTTCATCAGCATCCGGGGTTCTCCCAGCTAATCAGGCATCAGTTGCACTACAACGTCCACATAGTGGCAGACACAAGACCTGGAAGCTCGCACTTATCCCGATTTGCTGAACCCGTGTCAGAGACTTCTGCTACATGGGGTCAACATGTATGGTTCTTTCCTCTAAAATAGTGTATTTATTTATCTGAACTTGCTAAGCAACAGCGTTATCCTCTTTTATATCCTTATCTGTTAAGCATCATGTTAGTGTTCTCTTACTTCACTTTTGATTACCTGCAATAAA…	553	1	AT4G24680.1			similar to unnamed protein product [Vitis vinifera] (GB:CAO64289.1)	83.33	30	5	0	431	520	182	211	4e-08	54.7
MLN2.Contig_1433	TGATGCATTTCTGTGCGAGCGGAACAAAACATACATGAGTGAAGCGCAAAGGAGTGCACTAAACGCACTCCTCTTCCGCACGGGTGACCAGTCCAAAGACATAGTCCTAGCGCTTGCCACAAACCGACCCGGTGATCTAGACTCAGCGGTGGCTGACCGTGTCGACGAGACTCTTGAGTTCCCCTTGCCTGGAGAAGAAGAGCGCTTCAAGCTTCTTAACCTCTACCTAGACAAGTACATAACCAAGACTAATCTAAAAAAGCCGGGTTTGCTCCAAAGTCTTTTCAAGAAAGACCAGCAGAAGATTGAGGTTAAAGGCGTCACAGAGGATCTCCTCAAGGAAGCTGCCGCCAAAACAAAAGGGTTTTCAGGTAGAGAGATCGCGAAGCTGATGGCGAG…	572	1	AT5G16930.1	AAA-type ATPase family protein		similar to AAA-type ATPase family protein [Arabidopsis thaliana] (TAIR:AT4G36580.1); similar to AAA-type ATPase family protein [Arabidopsis thaliana] (TAIR:AT2G18330.1); similar to ATPase [Arabidopsis thaliana] (TAIR:AT3G03060.1); similar to hypothetical	94.92	177	9	0	2	532	467	643	1e-91	332
MLN2.Contig_1434	AAGAACTGTGTTCTTGATGTTGGACTCACTATTCAGGGGAATAAACCGGAGGAGTTACCGGAACAGATTCTGTGTTGCGTTCGGTTAAATGGGATTGATTACATGAATTATCATCAGTTAGCTCTTGGTCAAGAATTTCTATGACGAACATAAAGATTAACTTTTTTAATTGTATTTTTCTTTATTTATTTTTGTCCCTTAAGAACACAAAGATCTAAGAGCTTGTTTTCGTTTTGATGGAAAACCCAATAATGAAAAAAATTTGGT	267	1	AT1G59650.1	CW14	Encodes CW14.	similar to unknown protein [Arabidopsis thaliana] (TAIR:AT1G10410.1); similar to expressed protein [Oryza sativa (japonica cultivar-group)] (GB:ABF98316.1); contains InterPro domain Protein of unknown function DUF1336 (InterPro:IPR009769)	93.62	47	3	0	1	141	446	492	2e-21	97.1
MLN2.Contig_1435	AGTCCACTTGACCTCTCCTCCATCTTCTTGACGAGAAGATCGATCGGTACCCACCAGGAACGACGACCCTCTCGATAATCACCGCGTGTATTGAAACCCACCACAGAGAACGACGACGCTCTCGATCGGTGTCGTTGAACGCTCTCGATCGGTACCCACCAGGGACGACGACGCTCTCGATCCTCACCGCTCTCGATCCACAGATGAAGACTCTCGCTCCTCACCGTCGCGATCGTCCGAAGAAGGATCGAAATCCACGACTTGCGTCTCCTCCGTCGGTCGTAATGGCGACTCCTCCGTCAGACGAGTGTGGCGGTCCTGTTAGAGCCGTTAGAAGAAGGACCGAAACCCACCACAATCGACGAGTCTCTCAGTCCTCACCGCCTCTCCTCCTTCGGT…	594	1	AT5G14210.1	leucine-rich repeat transmembrane protein kinase, putative		similar to leucine-rich repeat transmembrane protein kinase, putative [Arabidopsis thaliana] (TAIR:AT3G03770.1); similar to hypothetical protein [Vitis vinifera] (GB:CAN69961.1); similar to unnamed protein product [Vitis vinifera] (GB:CAO14590.1); contain	40.38	52	31	1	316	471	716	766	1.8	29.3
MLN2.Contig_1436	GGAAATCAAAATCGGGAATCAGAAAACAAAAAAAAATGAGCGGAGTATCATCGGCGGCTTATTTCGCGCGGCGAGCGGCGCAGAAGGAGAAGGTTCGAATCCTCTACCGACGCGCTCTCAAGGATACTCTCAATTAGGCAGTCCATCGCCACATCTTCTACCGAGACGCTTCTGATCTGCGCGAGAAGTTCAATGCTAATCAAGACGTGGAGGATGTTGACAGAATCGACAAACTGATTGCTCATGGTGAAGCAGAGTACGACAAGTGGCGCCACCCTGATCCTTATATCGTTCCATGGGCACCTGGTGGCTCAAAGTTCTGTAGAAACCCCACTCCGCCTGCTGGGATTGAGATTGTGTACAACTACGGTCAAGAAGACAACCTTAATCCTCACTTTC…	586	1	AT4G34700.1	complex 1 family protein / LVR family protein		similar to Os06g0714100 [Oryza sativa (japonica cultivar-group)] (GB:NP_001058571.1); similar to hypothetical protein CX157 [Homo sapiens] (GB:AAK67625.1); contains InterPro domain Complex 1 LYR protein (InterPro:IPR008011)	94.83	116	6	0	36	383	1	116	6e-62	233
MLN2.Contig_1437	GACCAGACACGGGCCACGCGGTGAACGTGTTAGGCCCACTCGTGGAGAAATGGAAACCGACAAGCCAGGAACAAGAAGAGAGTTTCGGGATCGATATGAACAACATGAGTTTACCTCAAGCTCTACAGAGATGGCAGCAAAACGAAGGAACATCGACGTCAATGTTCGGTGGAGACTTCTCTTACTCTCAGACACAGTCTAGTATTCCTCCTAAGCCTTCTGGTTTTCATAGCACGTTCGATTCAACTGATGGTCGGTGACAACAAACTCTCGTGTGTTTTCAAATCGATGTTACTTTTGTGTGTGTGTGTTTTAATATCCTTTTATGATATGATGATTATATTTTTATATATTGTAAGCACATATATGATGTATTTGCCTCTGACCACTTGTGCTTTT…	468	1	AT3G23750.1	leucine-rich repeat family protein / protein kinase family protein		similar to TMK1 (TRANSMEMBRANE KINASE 1) [Arabidopsis thaliana] (TAIR:AT1G66150.1); similar to unnamed protein product [Vitis vinifera] (GB:CAO45242.1); similar to hypothetical protein [Vitis vinifera] (GB:CAN69461.1); contains InterPro domain Protein kin	83.72	86	13	3	3	257	845	928	6e-34	139
MLN2.Contig_1438	GAACAGACGAATAATCGGCATCGACGACGACGACGGCGGCGGAAGTAATGGCGAACCTAGAACCCGAAACAGTCGATTTCGAGCCAGAGGAGGATGACCTCATGGACGAAGACGGTGCAGCAGCTGATCTCTCCCCACGCGCTGCGAATCCACGGCTCAGGTCTACTATCGCCGGAGCGAACGACGATTCAGCTCAGAGGAAGACCAAAGGCCGTGGCTTTCGCGAGGAGAAAGATTCCGATCGCCAGCGCCGCCTTTCCTCCCGAGATTTCGATTCGCTCGGTTCCGATGGTGGTCCCGGCCCTCAGCGATCTATCGAGGGGTGGATTATTTTGGTGACGGGAGTTCATGAGGAGGCACAGGAAGATGATATATCGAATGCTTTTGGTGATTTTGGGG…	599	1	AT1G51510.1	Y14; RNA binding / protein binding	This gene is predicted to encode a protein involved in the exon junction complex. Though there is a predicted RNA binding motif, in the Drosophila ortholog (33% identity), this motif mediates interactions with Mago and is not available for RNA binding. Th	similar to GR-RBP6 (glycine-rich RNA-binding protein 6), RNA binding [Arabidopsis thaliana] (TAIR:AT1G18630.1); similar to unknown [Populus trichocarpa] (GB:ABK94013.1); contains InterPro domain RNA binding motif protein 8; (InterPro:IPR008111); contains	80.21	187	33	3	48	596	1	186	5e-68	253
MLN2.Contig_1439	GGGTGTTTGTTCGTTCGTTTCTCCATTGATGGCTACCGAATCGATGGTGGTAGATGCAGCGAAGCGAGCTCCGACGAGGGATTCCCTGGCGGAAGAAGAGCAATCGTCGTCGCCCATGAAGAAACAGAAGGTGGAAGAGGAAGAGAAGATATACAGTGAGACACACGTGCCCGAGCTGGGTTGTAAACCCCAGTGGGATGTGGACAGCTACGATGGTCGCGAGTACGAATCAGATCCCGAGGATAGAAAGTTGTTCTCTGACGACGAAGAGTATGACAAGTACCGTCGCGAAAGACGCAGGTCTTTCGATAGTAAGGGATTTATTTATGAACCTCTGAGCGGAAACTATCCAATTAAAGATCTGGAAGCATTAGTGTATCCCAACGTGACTAGTCGGGA…	545	1	AT5G17150.1			similar to unknown protein [Arabidopsis thaliana] (TAIR:AT5G17120.1); contains InterPro domain Cystatin-related, plant (InterPro:IPR006525)	55.78	147	59	4	29	451	1	136	3e-27	117
MLN2.Contig_144	TCAGCAAGTCATCGCTGAGATGACTAACGGCGGTGTGGACAGGAGTGTGGAGTGCACTGGAAGCATTCAAGCCATGATTCAAGCCTTTGAATGTGTTCACGATGGCTGGGGTGTTGCGGTGCTGGTTGGTGTGCCGAGCAAAGACGACGCTTTCAAGACTCATCCGATGAACCTCCTGAACGAGAGGACACTCAAGGGTACTTTCTTTGGGAACTACAAACCCAAAACCGACATTCCCGGGGTGGTCGAAAAGTACATGAACAAGGAGCTGGAGCTTGAGAAGTTCATCACTCACACAGTGCCGTTCTCTGAGATCAACAAGGCCTTTKWTTACATGTTGAAGGGAGAGAGTATCCGTTGCATCATCACCATGGGTGCTTGAAGAAACTACATTTCTCT…	530	2	AT1G77120.1	ADH1 (ALCOHOL DEHYDROGENASE 1)	Catalyzes the reduction of acetaldehyde using NADH as reductant. Requires zinc for activity. Dimer. Anaerobic response polypeptide (ANP). Fermentation. The protein undergoes thiolation following treatment with the oxidant tert-butylhydroperoxide.	Identical to Alcohol dehydrogenase class-P (ADH1) [Arabidopsis Thaliana] (GB:Q9CAZ2;GB:Q9CAZ3); similar to ADH2 (ALCOHOL DEHYDROGENASE 2), formaldehyde dehydrogenase (glutathione) [Arabidopsis thaliana] (TAIR:AT5G43940.1); similar to alcohol dehydrogenas	96.83	126	4	0	2	379	254	379	4e-68	253
MLN2.Contig_1440	TCATCCACGGAGCAGGACACGTGGATCCGAACAAAGCCTTGAACCCTGGGTTGGTTTACGACATCGACGTCAAAGACTACGTGGCATTCCTCTGCGCCGTGGGATACGAGTTCCCGGGGATTCTAGTGTTCCTTCAAGATCCAACTCTTTACAACGCCTGCGAGACGAGCAAGCTAAGAACCGCCGGCGATCTCAATTACCCGTCGTTCTCCGTCGTTTTCGGATCGACAGTCGATGTTGTGAAGTACAGAAGGGTTGTTAAGAACGTTGGAACCAACGTTGACGCGGTGTACGAAGTCGGGGTTAAGTCTCCGGCGAATGTGGAGATCGATGTGTCTCCGAGGAAGCTTGCGTTTAGCAAGGGGGAAGGCGAGTTGGAATACGAAGTGACGTTTAGGA…	555	1	AT3G14067.1	subtilase family protein		similar to ARA12, subtilase [Arabidopsis thaliana] (TAIR:AT5G67360.1); similar to subtilase family protein [Arabidopsis thaliana] (TAIR:AT2G05920.1); similar to subtilase family protein [Arabidopsis thaliana] (TAIR:AT3G14240.1); similar to unnamed protein	91.07	168	15	0	3	506	602	769	2e-79	291
MLN2.Contig_1441	ATCCTCGTTCCGGGGAGGCACACGGCGGCGATGAGATCGATCCTCGTTACGGAGTGGAGAAACGCCGTGTTCCCTCCGGACCTAATCCGTTGCACCATTAATTGATGAATGACGATGACACGTGCTTGGTTTGAGTGGTAACATATAAGCCAAAGATACACCTTTACCTACCTTTTTTTGTCCGAAAGGGAAAACTTAAAGATTAGAGTATTTCATTTTCTTAGATACGAATACGTTTTACGAGTTGGGTTTGATACGTTTTTCTTCTTTAAATCATAGTAAACAAAGGGTATTTTAGTTTAGCTTCTTTTTTTGTTTTTTGTTTTTTTGATAAATCCTATGGCGACTGATTTGGTTCGCCTCGGGAGGAACGCACTTAGTGCTACAGAGTGGACTGTC…	589	1	AT1G68795.1	CLE12 (CLAVATA3/ESR-RELATED 12); receptor binding	Member of a large family of putative ligands homologous to the Clavata3 gene. Consists of a single exon.	similar to CLE13 (CLAVATA3/ESR-RELATED 13), receptor binding [Arabidopsis thaliana] (TAIR:AT1G73965.1); similar to hypothetical protein [Vitis vinifera] (GB:CAN78729.1)	90.32	31	3	0	6	98	88	118	3e-11	65.1
MLN2.Contig_1442	GTGTTTGCTGTGTGGTGGCGCGTGGTCTCTGGTTCCGGCGTGTGACAGGTCGTCGGGCTTCGTTTTTGCCTTGTCGTCTATGGCTAGGTGATCTAAGCTTCATCGACTGTCCTCTCTTCCTTCAAGCTCTACCAGTGTTTTGGTGTCCTTCTTGTCCTCCAGGAAGCTTGTCTTTCTCTGAGGTGTTTTGACTCTCGGGCTCATCCTTCTTTCCTCTTTGTTGGCACCGAAGGGACTTCTCACGGTCACTGTTTCTGATCTGTTCTTCGGTTCTCGAAGACAGGCTTATGGCGTGGAGCTGGTGTAGTCAGGTTGTTCTCTGGTTATACGGTTTCTCGGTGGCTCCATTCGTTAGGATTTTCGCATCCCAGTACCAGCATTGGTCTTTTGATGTGTTGG…	568	1	AT5G41760.2	nucleotide-sugar transporter family protein		similar to unknown protein [Arabidopsis thaliana] (TAIR:AT2G43240.2); similar to unnamed protein product [Vitis vinifera] (GB:CAO39723.1); contains InterPro domain Nucleotide-sugar transporter; (InterPro:IPR007271); contains InterPro domain UDP-galactose	35.9	39	25	1	283	399	223	257	4.9	27.7
MLN2.Contig_1443	TGCCTTCCCGTATCTCCTCCAGTTTATCCGAGAATACTCTGGCAAAGTGGATGAACTGATCAAGGACAAGCTAGAGGCTCAGAAAGAAGTGAAGACCAAAGAGCAGGAAGAGAAGGATGTCATGTCCCAACAGAACATGTACGCTCAATTATTTCCACTGGCTCTACCTGCACCACCGATGCCGGGAATGGGAGGAGGTCCAGGGATGGGAGGCGGTTATGGTCCGCCACCACCAATGGGAGGAATGCCGGGAATGCCGGGAATGCCTCCGATGCCACCGTATGGAATGCCACCGATGGGCGGCTACTAAGACTATCAGAAACAAAAGCTAAACGTTCAAGTAATCAGTTGCGCAATCTCTACCACGGTGGTATTCGTCAGAATGTTTCCTTCTTTGTT…	569	1	AT3G11130.1	clathrin heavy chain, putative		similar to clathrin heavy chain, putative [Arabidopsis thaliana] (TAIR:AT3G08530.1); similar to unnamed protein product [Vitis vinifera] (GB:CAO41391.1); similar to hypothetical protein OsJ_033574 [Oryza sativa (japonica cultivar-group)] (GB:EAZ19365.1);	96.49	57	2	0	2	172	1609	1665	5e-16	80.9
MLN2.Contig_1444	GGACCAAACCTTTGAATTGATTGCAGAGGACAAAGAAACTCAGTCGCTCACTATAGAGGTATTTGATAAAGACGTAGGCCAAGACGAGCGTCTAGGACTTGTGAAACTTCCTTTAAGCAGCTTGGAAGTTGGAGTAACAAAGGAAATGGAGCTGAACCTGTTGTCTTCACTTGATACTCTGAAAGTAAAAGATAAGAAAGATAGAGGAATTATAACCCTAAAGGTACATTACCATGAGTTCAACAAAGAGGAGCAAATGGCTGCGTTAGAGGAAGAGAAGAAAATAATGGAAGAAAGGAAGAGATTGAAGGAAGCAGGAATGATAGGTAGCACAATGGATGCAGTTGGAAGTGGGCTCGGTGCTGGTGTAGGAATGTTGGGACAGGGATTGGTGCAGGA…	584	1	AT3G61050.2	NTMC2T4/NTMC2TYPE4; lipid binding		similar to C2 domain-containing protein [Arabidopsis thaliana] (TAIR:AT3G61030.1); similar to C2 domain-containing protein [Arabidopsis thaliana] (TAIR:AT3G60950.1); similar to CLB1 [Solanum lycopersicum] (GB:BAA24382.1); similar to unnamed protein produc	86.11	36	3	1	481	582	475	510	1e-09	59.7
MLN2.Contig_1445	GTATGCATAGCTCAGATCATCAAAGATAATCATTAATATTTTCTCTCCTATGTTTCCCTCTTTTGCTCCATGTTCTATTTTCTATGTGTGTTTTTGCTTATATGGGTTATATATCCACTTTGACATCTGTACACGTTCCTTTGAATTTCTACTCTAAGAAAGGTTTAAAGCTTATCTAATTATAGTATGTGCATGTGAAAAGGATATAGTAATTAAATACATGTGTAAATTAAACTTTCATCAGAATGATGATCACTTTGAGTTGACCTAATTAAGATCAGATAAAAGTTTATATATACATATGAAAATTAGGATTGATTTGAGGTTAGTGGAGAATTGCTTCATCTCGACAAGGACAATGAGGACAGAAAACAGAGAAATAGAGGAAGAGAGTTTAAT…	599	1	AT5G02940.1			similar to phosphotransferase-related [Arabidopsis thaliana] (TAIR:AT5G43745.1); similar to unnamed protein product [Vitis vinifera] (GB:CAO71282.1); similar to hypothetical protein OsI_009890 [Oryza sativa (indica cultivar-group)] (GB:EAY88657.1); simila	32.86	70	47	5	179	388	461	512	9.1	26.9
MLN2.Contig_1446	CAAGTCGTAGCAGCATCCGTTAATCAACAACGTGGGATAGATGAACGGTTCCTAGCTATGGTCACACCGAGACCGAGAGGTAACCTGAGGAGACACTCCAGGCGATTTCGCAGATGCTGGGCATTTCTTAAGATCTTGCTCCCTCTGCGAACGCTTACTTGTTCCCGGCCGTGACATCTATATGTATAGGGGAGATACGGCCTTCTGTAGTTCAGAGTGCAGGCAACAGCAAATGGCACAAGACGAGAGGAAAGAGAAGGGTAAACCGGCAAGGCAATCGGTGGTGGCAGCCACCGCAAAACCCGGCAAAGGAGGGAGAGCTGCAGCCGCCGTGTAATACCCACATATATATATGGTTATAATATATTTATATGTTGTTTGTGGCTTGCTATGTGTTTG…	610	1	AT1G78020.1	senescence-associated protein-related		similar to senescence-associated protein-related [Arabidopsis thaliana] (TAIR:AT1G22160.1); similar to unnamed protein product [Vitis vinifera] (GB:CAO61750.1); contains InterPro domain Protein of unknown function DUF581 (InterPro:IPR007650)	83.08	65	8	1	101	286	81	145	2e-26	115
MLN2.Contig_1447	TAGTGCCAGAGACTCCCACGTCCCAGTGTTGGCGCCACTTCCCATTGGATTTGCGGTGTTTATGGTGCACTTGGCTACCATTCCCATCACTGGAACTGGAATCAACCCGGCAAGGAGTTTCGGAGCAGCCGTTATCTTCAACGAGAGCAAGCCATGGGATGACCACTGGATATTTTGGGTGGGACCATTCGTTGGAGCTGCGATAGCTGCATTCTACCACCAGTTCGTTTTGAGGGCTTCAGGTTCCAAGTCTCTCGGATCTTTCAGAAGTGCTGCCAACGTTTAAATACTCTCTCATTTCCACCAATCAGATTCTGAAATAATAAAGATGATAATCTTTTACTCTATGTACAAATTATCCAAATCAGTTTCAGTTTGTTATCTTATTTGTGTGTATTC…	545	1	AT3G53420.2	PIP2A (PLASMA MEMBRANE INTRINSIC PROTEIN 2A)	a member of the plasma membrane intrinsic protein subfamily PIP2. localizes to the plasma membrane and exhibits water transport activity in Xenopus oocyte. expressed specifically in the vascular bundles and protein level increases slightly during leaf dev	Identical to Aquaporin PIP2-1 (PIP2-1) [Arabidopsis Thaliana] (GB:P43286); similar to PIP2B (plasma membrane intrinsic protein 2,2), water channel [Arabidopsis thaliana] (TAIR:AT2G37170.1); similar to plasma membrane intrinsic protein 1 [Brassica napus]	96.81	94	3	0	2	283	194	287	1e-49	192
MLN2.Contig_1448	GAGAACTGCCTGATGCGTAACAAACGATGCCACTGTCCGCATCAATATCATCGCCGTCTTCTCTCGCTCTTCTCTCAGCCCGATCACGATCGCCTCTCTCCTTCTTCATCTCCACTCCCAAAACCCTAATCATATCCAGAACCCCTGATCCTCCTTGCACTTCCCTTTTTGCTTCCCGGCGACCCCGCGACTTCATCAACGGGAGAGGGATGGTTTCGTAGACGGTGATCGGAGCTGGAACCGGAAGATCAGACCGGAGTATGGGATCGATGAGGATTACGAAGAGGACGAAGACGAGGAGGAGGAGGAGGAAGAAGAAGAAGATAGAAGCTTGGATCTTTTACTTCGGTTCGTCGAGAATGTCTTCAGAAAAGTTTCGAAGCGAGCAAGGAAAGCCGT…	528	1	AT4G33780.1			similar to unknown protein [Arabidopsis thaliana] (TAIR:AT1G69935.1); similar to unnamed protein product [Vitis vinifera] (GB:CAO49867.1)	65.71	35	12	1	102	206	23	56	0.002	38.9
MLN2.Contig_1449	CGCTCTCATGGGGATGGCTGCAAACGTTCCCCTCGGTGTTTGGAGAGAACACACCATCAAGTTTTCGCCTTCTTGGTTTGTGGCGGTCCACGCTGCTGTGCCTTTCATAGCCATGCTCAGGAAATCTGTGCTGATGCCTAAAGCAGCCATGGCTTTGACCATTGGAGCGTCCATCTTGGGACAGGTGATTGGGTCAAGAGCTGAACGTTACCGTCTCAAAGCGTTGGCTGCTAATACAGTTGCTGAAACATCCACTGTTACCGCGGGTGATGGATACAATGAGGTCTCTGATGGTTCAGGCTTTGCTAAAGGACATTGTGGTGCAAGGGAAGGAGTGAAGGAGGTTTATTACAATGCGAATGTTGGAGAATCTGCTAAATCAACTGGCCTCTGCTATTG…	536	1	AT5G45410.3			similar to unknown protein [Arabidopsis thaliana] (TAIR:AT4G25030.2); similar to unknown protein [Arabidopsis thaliana] (TAIR:AT4G25030.1); similar to unnamed protein product [Vitis vinifera] (GB:CAO66717.1)	78.03	132	29	1	2	397	214	342	3e-53	204
MLN2.Contig_145	CGGAATCTGCAATTGGTCAGCCTTTTTCGAGGAACGCCTNTGGTCCGTCTATCTCCTACGAGGAACTACGGCCAAGCTAGTTCTTAGTGAGCTTTCTCTCTTCGGGACACAGAACTCCCGGAACTTCCTTTCTTGATTCACCAGAACGGAACTTGCTCTAATCCTTCTCGTTCGATCCATTCTTCCTAGCGCTCCTCAATCAGATCCATAACTGCTGTTGCTTGTGCAGGAGTAACTGGAGAACTTCTAATTTCAATGCAGTTGTCAACTAAGAAACACCGGAAGTCCATGCGAGCCGGGCTGACATTAACCAATCAGATACCCTCCTCGAAAGGGCCTGAAATCAAACACCCAGCCCTATTAGATATTAGATTAGAGAAGGGATAAAGTCGAGAATGA…	952	2	no significant hit
MLN2.Contig_1450	TGCCGAAGGCAGGGCTAGTGACTGGAGTGAAGTCGGAACAAGGTAGCCGTACTGGAAGGTGCGGCTGGATCACCTCCTTTTCAGGGAGAGCTAATGCTTCTTGGGTATTTAGGTTTGACACAGCTTCAAACCCAAAGCCCATGAGCTTATTATCCTAGGTCGGAACAAGTTGATAGGATCCCCTTTTACGCCCCCATGTCCCTCTCGTGTGGCAGCAGGGGGGCGTAAAAAGGAAAGAGAGGGATGGGGTTTCTCTCGCTTTTGGCTTGGCATAGCGGGCCCCCAGCAGGAGGCCCGCACGACGGGCTATTAGCTCAGTGGTAGAGCGTGCCCCTGATAATTGCGTCGTTGTGCCTGGGCTGTGAGGGCTCTCAGCCACATGGATAGTTCAATGTGCTC…	652	1	AT1G16590.1	REV7 (Reversionless 7); DNA binding	putative translesion synthesis polymerase zeta subunit, homologous to Y-family DNA polymerases, contains BRCT domain. Mutants are sensitive to UV-B radiation. Gene is involved in damage-tolerance mechanisms through translesion synthesis(TLS).	similar to unnamed protein product [Vitis vinifera] (GB:CAO23810.1); contains InterPro domain DNA-binding HORMA; (InterPro:IPR003511)	35.71	42	27	1	350	475	139	179	1.6	29.6
MLN2.Contig_1451	CGGGAAAAAGTTGTCGGCTCCGGTGGCTGAACTATCTCCGGCCAGATGTGCGGCAAGGGAACATAACAGAAGAAGAACATCTTTTGATCATTCAACTTCATGCTAAGCTTGGAAACAGGTGGTCGAAGATTGCGAAATATCTTCCAGGGAGAACGGACAACGAGATAAAGAATTTCTGGACGACAAAGATTCAGAGACACGTGAAAATGTCTTCGTCGAAAAATACTAATAATATTCGTCATTGTTTGGGAAACTCGCAGAGCTCGGTGATAACGGCGACGGACCAAGGAAGCTCCAGCAAAGGCTTAATCTCGCCTGCGACGACAACGACATCGTTTCATGTGATGGAACAGTCAAACGACAGTTACTGGAACGTTGAAGATATATGGCCCCTTCAGT…	544	1	AT3G01530.1	AtMYB57 (myb domain protein 57); DNA binding / transcription factor	Member of the R2R3 factor gene family.	similar to ATMYB21 (MYB DOMAIN PROTEIN 21), DNA binding / transcription factor [Arabidopsis thaliana] (TAIR:AT3G27810.1); similar to MYB24 (myb domain protein 24), DNA binding / transcription factor [Arabidopsis thaliana] (TAIR:AT5G40350.1); similar to My	71.23	146	37	2	3	425	63	206	2e-54	208
MLN2.Contig_1452	AGACAAGCTTGGTCAGCATGTCCTGCTGAAGTTTCCAGGGCCCAGTCAGTGGCTGCTGCAGACGCTATCCCTCTACTTCAGTACCTAATTCAATCAGGTCCACCGCGGTTCCAGGAAAAAGCTGAATTCCTCTTGCAATGCTTGCCAGGAACTCTAGTGGTCACAATCAAACGCGGTAATAACATGAAGCAATCCGTTGGTAACCCTAGCGTGTTCTGCAAGATAACACTTGGTAACACACCTCCTAGACAAACCAAGGTGATATCGACCGGTCCAAATCCAGAGTGGGATGAGAGTTTCTCATGGTCATTTGAGAGCCCTCCCAAAGGTCAAAAACTCCACATTTCATGCAAGAACAAGAGCAAAATGGGAAAGAGTTCATTCGGGAAAGTAACGATT…	633	1	AT2G22125.1	binding		similar to binding [Arabidopsis thaliana] (TAIR:AT1G77460.1); similar to C2 domain-containing protein / armadillo/beta-catenin repeat family protein [Arabidopsis thaliana] (TAIR:AT1G44120.1); similar to predicted protein [Physcomitrella patens subsp. pate	99.41	170	1	0	1	510	1981	2150	2e-83	305
MLN2.Contig_1453	GGTCCACCGTCTTCCTCCTCCTACTCCTTGTCTCCGCCAGCATGCCCCCTTCCTCCTCCTACTCATCATCCCTCCACCCCTGCAAGCATTCCCCGTCAGCAACTCTCGACCTCCTAATCCTAATCCTCGTCCTCTTCTCCGGCGCATTCCTCATCTCCTCCTACTTCTCCTACCTAATCCACTCCTTGCCCCTCCTCTCCTCTCATTTCCCATCGATCGCCCTCTCTCTCTCCTCTCCCCCTTTCCCTCTTATCCTCCTCTTCTCCGATCACGACCACGATCCCGACGATGAAGATCACGACGGAATCTCTCTGGCGTCGTTCTTGTTCGTGTTCGCGGTCTTCTTCGCTGCCTCGGTCGCGTTCCTCGACCTGTGCTGCGGCTCGAGGTCGAGGAGGT…	544	1	AT5G19020.1	pentatricopeptide (PPR) repeat-containing protein		similar to pentatricopeptide (PPR) repeat-containing protein [Arabidopsis thaliana] (TAIR:AT2G22070.1); similar to unnamed protein product [Vitis vinifera] (GB:CAO71087.1); similar to Tetratricopeptide-like helical [Medicago truncatula] (GB:ABN09753.1); c	87.93	58	7	0	369	542	143	200	3e-26	114
MLN2.Contig_1454	CAGACGCCGCATGGCGGCGGAAGAGGAGTACGAGAAGATGGTGTTGGTGTCGAATACGAATCGCAATGATTCGATCATCGATGCTCGTACCGTTGACGAGGCGCTGGCGAAGATGAGTGTCGCGGATAACCTCCCCGTTGATCGCCACCCGGAGAAAAGGCTCAAGGCTTCCTTTAAGGCTTATGAAGAAGTTGAGATGCCGAGGCTGAAGGAGGAGAAGCCAGGTCTTACTCACACTCAGTACAAGGACTTGATTTGGAAGATGTGGAAGAAGTCTCCTGACAATCCTCTTAACCAGGCTGCTGCTGCTGAGTGAAATGCAACTTGTAACCGGAACAAGGGGAAGGTCTCATGACGGGAGGAAGAGAGGATACGTCAAGTGAGAGAGACTTTTGTGTG…	525	1	AT1G16210.1			similar to unknown [Picea sitchensis] (GB:ABK22525.1); contains InterPro domain Protein of unknown function DUF1014 (InterPro:IPR010422)	85.58	104	15	0	8	319	130	233	2e-48	187
MLN2.Contig_1455	GATAAGAAATATTTAGCTACAAAAAAAAAAAAAAAAAAAAAGTAACGCTCTCACCTCTCTCCTCTTTTGGCGATTAGGGTTTGACAGTGTAGCCGCCCCCGGCGAGCCTCACGCTCGCTGGTGAGAATCTCTTCTCCTTTCTCCCTCCTCTTCCTTTCTTCTTCCTCTTTGCTTTCTGATGATGGGTCTTTTGGTTTGTGATTCGGAGTTATTTTCTCCAGATCTGCCAGTCTCCGCTTCTGCTACAGGATCTTCCTCTGATGTTCATGGTGGCTCTGAGTTTCTGAGCCCGCCAGACCCACCGGACCCTCCAGATCCACCGGATTTAGATTTTGACGGTGACTCAATTACGGCAGTATGCAGTCTCATCTACTGGTCTTCCCCGACTCCTTCTAAGGC…	532	1	AT1G04120.1	ATMRP5 (Arabidopsis thaliana multidrug resistance-associated protein 5)	member of MRP subfamily	Identical to Multidrug resistance-associated protein 5 (MRP5) [Arabidopsis Thaliana] (GB:Q7GB25;GB:O65619;GB:Q56ZX0); similar to ATMRP3 (Arabidopsis thaliana multidrug resistance-associated protein 3) [Arabidopsis thaliana] (TAIR:AT3G13080.1); similar to	26.42	53	28	1	353	478	529	581	7.4	26.9
MLN2.Contig_1456	GAACATCAACCTCTCTCAGACCAACCTCATCGAGATCTTCTTGCACAAACGATGCAGAAACATAGCTTGCCAAAACGAGCTCCCTGCCGACGACTGTCGCTGCGAGATGTGCGCCAACAGGAAAGGCTTCTGCAACCTCTGCATGTGTGTGATTTGCAGCAAGTTCGACTTTGCGGTCAACACGTGCCGCTGGATCGGCTGCGACGTGTGTTCTCATTGGACTCATACGGACTGTGCGATTAGAGATGGAGAGATCTCGATGGGAGTTTCGGCTAAGAGTGTGTCTGGAGTGGGAGAGATGCTGTTCAAGTGTCGAGCTTGCAACCATACCTCTGAGTTGCTCGGTTGGGTTAAAGATGTGTTTCATCACTGTGTGCCGAACTGGGATAGGGAGGCTTT…	613	1	AT3G07780.1	protein binding / zinc ion binding		similar to tropomyosin-related [Arabidopsis thaliana] (TAIR:AT5G48160.1); similar to tropomyosin-related [Arabidopsis thaliana] (TAIR:AT5G48160.2); similar to unnamed protein product [Vitis vinifera] (GB:CAO41189.1); similar to Potyvirus VPg interacting p	88.73	204	23	0	2	613	180	383	2e-111	398
MLN2.Contig_1457	GGTCTTAAGCTGTGTACAGAATCAAGTTTCAGACAGAGAGAGAGAGAAACAAATTCAAGAAAGACGACTAAAGAAAATCTCAAAAGCCTCTCACCCATCCAGAAGGTTTGGTCAAAGAAGAAGATGAACTCTCGCGCGATCTACGCCGTCATCGCGCTCCTCGCGCTCGTAATCTCAGCCGTCAACGCAACCGGAGGCTTCGGAGACTCGCTTGATTTCGTACGGACGGGATCTTCTTCGCTCTTCTCTGGATGCGAAGGTTCGATCGCTGAGTGTATAGCCGAGGAAGAGGAGATGGAGTTCGACTCCGAGATCAGCCGGCGCATTCTAGCGCAGAAGAAGTACGCTAGCTACGGTGCGATGAGGAAGAACAGTGTGCCTTGCTCGCGACGTGGAGCT…	632	1	AT3G05490.1	RALFL22 (RALF-LIKE 22)	Member of a diversely expressed predicted peptide family showing sequence similarity to tobacco Rapid Alkalinization Factor (RALF), and is believed to play an essential role in the physiology of Arabidopsis. Consists of a single exon and is characterized	similar to RALFL33 (RALF-LIKE 33) [Arabidopsis thaliana] (TAIR:AT4G15800.1); similar to rapid alkalinization factor preproprotein [Nicotiana attenuata] (GB:AAS13437.1); similar to RALF precursor [Nicotiana tabacum] (GB:AAL26478.1); contains InterPro domai	92.39	92	7	0	190	465	24	115	5e-34	140
MLN2.Contig_1458	GGACCAGTGGACTACCAACGAGTCATTCTTCTTATGCTAAAGGCATTGCTCCAACATACTCCCATGGATGCTTCCCAGAGTCCCCACATGTACACTATCGTCTCACAGCTAGTCGAAAGCACTCTGTGTTGGGAAGCACTGAGTGTTCTCGAAGCCCTTCTTCAGAGCTGTAGCCCAGTACAAGGCGGTAGCAGTGGATCCTACTCTGACGATTGGACTGATGAGAGAACGCTTGTACCTCAGACCTCATTCAAAGCCCGAAGCGGACCTCTCCAGTACACAGTGATGGCGGCAACAACAACGTCGCAAGCTTTTCCTCTCAGTGCAGCTGCAGCAGAATTAGAGATGCCTTCGAGAGATGTGGCTTTGCAGAACACAAGGCTGGTATTGGGTCGAGTT…	585	1	AT5G15680.1	binding		similar to hypothetical protein [Cleome spinosa] (GB:ABD96836.1); similar to unnamed protein product [Vitis vinifera] (GB:CAO49238.1); similar to hypothetical protein [Vitis vinifera] (GB:CAN67023.1); contains InterPro domain Armadillo-type fold; (InterPr	84.66	163	19	2	1	471	1992	2153	1e-71	265
MLN2.Contig_1459	GCACAAAACCAAGACTCATCTCTTCTCCTGAGCCAAAAAAAGAAAATGGCGAGCTCGCTTCTCACCTCGACGCCATTGTCCTCATCTTTCTTACCTGTTCCTCGGAGGCTGTCGGTTCAACATGGCCATTGTCAGAGCAAAAGAACACTCAGGTTCGGTCTGAAACAATCGTCTCTCTGTGTACGCGCCGCTAAACTCCCTCAAGGGGTGATAGTGCCAAAAGTGGAACCCAAGTTTGTACCAGCGTTTCTGGGATTCACATTTACAGCTGAGATATGGAACTCTAGAGCTTGTATGATTGGTCTCATCGGTACCTTCATTGTTGAGCTGATTTTGAACAAAGGAATACTTCAAATCATTGGTGTTGATGTTGGAAAAGGGCTTGATCTTCCTCTCTGA…	578	1	AT5G02120.1	OHP (ONE HELIX PROTEIN)	Encodes a one helix protein homologous to cyanobacterial high-light inducible proteins. The protein is localized to the thylakoid membrane and its transcript is transiently induced by exposure to high light conditions.	similar to one helix protein [Ipomoea nil] (GB:AAP23938.1); contains domain SSF103511 (SSF103511)	73.2	97	25	1	109	396	14	110	1e-33	139
MLN2.Contig_146	AACAGAGCCTCTTCCGTTAGGTAAAAACGATCACTGCTTCGACATAGATTTCTGCAGATCAAAGCTCTCTGCTTTCACCTACCCAACTCAATCAACCACCCACAGTGTTTCGACTTCGTCTCTCGAATACGGCGTGGTTCCCGACGGAAACACCTCGTCGGAAATCTCGATTCCGTTTAACCGGAGCACCACCACCACGATCACCGCCTCCACCGGGGATCAAGCGAGCTCCATGAACAGGGAGGCAAGGGTTTTGAGGTACAGAGAGAAGCGAAAGAACAGGAAGTTCGAGAAGACGATCCGTTACGCTTCAAGGAAAGCTTACGCTGAGTCACGGCCRAGGATCAAAGGCCGGTTCGCGAAACGTACAGAGACCGAAAACGACGACGTTTTCTTCAG…	715	2	AT5G57660.1	zinc finger (B-box type) family protein		Identical to Zinc finger protein CONSTANS-LIKE 5 (COL5) [Arabidopsis Thaliana] (GB:Q9FHH8;GB:Q8L9H4;GB:Q93ZC8); similar to zinc finger (B-box type) family protein [Arabidopsis thaliana] (TAIR:AT5G24930.1); similar to unnamed protein product [Vitis vinifer	82	150	25	2	2	445	210	355	3e-55	211
MLN2.Contig_1460	TGATGATGAAAATAAGAAATGGCACGTCTATGCTGCCTCCTCTGCCCAGACCTCCAGCGACTGCAACAACAATGTCTACACGCTCGAGATGTGCATGACTGGTCTTGACAAGGAGAAAGCCTCTGTCTTCTTCAAGAATGAAACTGGTGGGGAGAATGGATCAATGACCGACAACTCTGGAATCAGAAAGATCCTCCCTAAGTCCCAAATCTGCGACTTTGAGTTCGAGCCCTGTGGCTACTCTATGAACTCCGTTGAAGGAGATGCAATCTCCACTATCCATGTGACCCCTGAGGATGGGTTTAGCTACGCTAGCTTCGAAGCCGTGGGTTATGACTTCAGCACTCTCGACCTGAGCCAGCTTGTGACAAGGGTTCTGTCTTGCTTTGAGCCAAAGCA…	537	1	no significant hit
MLN2.Contig_1461	CTCTACGTCCCGGAGACGAAGCTGAAACGAGAGACTCTGAGGCTCGGTTTCTTGGCAAGAGCTGCTGACTCCACGAGCTCCTCTCCTCCCGTGGTGGCTTCCGGTGAAAAACTTTGATCCCTGATGATGAATTCACCCTAGCCAAGATTTCATTTGGTGTTATTGGGCTAGGTCTCGGGGTCTCCCTCCTCTCTTACGGTTTCGGGGCATACTTTAACATCCTTCCTGGATCTGAGTGGTCTGCTATTATGCTTACTTATGGATTTCCTCTTGCTATTATCGGTATGGCACTCAAGTACGCAGAACTCAAACCAGTTCCTTGCTTGAGTTATGCAGATGCGGTGAAGCTTAGGGAGAGCTCTGCTACTCCTATTTTAACCCAGGTGAGAAATGATGTGA…	585	1	AT5G38660.1	APE1 (ACCLIMATION OF PHOTOSYNTHESIS TO ENVIRONMENT)	mutant has Altered acclimation responses;	similar to unnamed protein product [Vitis vinifera] (GB:CAO49291.1)	67.57	37	12	1	1	111	46	81	4e-75	49.7
[truncated: 1,084 more rows]

## Sheet: trimmed seqs and contig assemb
Raw Sequence ID	EST CLONE ID	Genbank Accession	dbEST ID	MLN2 trimmed seqs	MLN2 Contig ID
[truncated: 2,582 more rows]
