# Supplementary material for: Identification of Differential Gene Expression in Brassica rapa Nectaries through Expressed Sequence Tag Analysis
Source: PLoS One. 2010 Jan 20;5(1):e8782. doi: 10.1371/journal.pone.0008782 (PMC2808342; doi:10.1371/journal.pone.0008782)
Supplement: Table S7 — Contig sequences generated for all ESTs combined (unigene set; MLN-1 + MLN-2 + MMN-1 + MMN-2) and blastx results for each contig. The second tab indicates which ESTs formed which contigs. (7.68 MB XLS) [file pone.0008782.s007.xls]

## Sheet: Contig seqs and blastx results
Contig ID	Consensus contig sequence	Contig Length	No. of ESTs in contig	Top Arabidopsis protein hit (blastx)	Short_description	Curator summary	Description	% identity	alignment length	mismatches	gap openings	query start	query end	subject start	subject end	e-value	bit score
All.Contig_1	GGTSACACATTGATTTTGTTTTCGCTGCTTATCTTAACGTCTAATCATCATGGGTTTGAAGGGGGAGTTCGAGGAGCACGCTGAGAAAGTCAAGACGCTCACCACGAAACCATCTGACGAAGACTTGCTCATCCTCTACGGTCTCTTCAAGCAAGCCACCGTCGGGCCAGTGACCACCAGCCGTCCTGGGATGTTCAGCATGAAGGAAAGAGCCAAGTGGGATGCTTGGAAGGCCGTTGAAGCGAAATCGACGGATGAGGCCATGAGTGACTACATCACTAAGGTGAAGCAGCTCATGGAAGCAGCAGAGGCTTCAACTTGATGAATTTATATATGATTCACCAAATGCTCCACATCTAAACTTCAAATAACTTAGCATAAGACTTTGTTCTTGTTGCT…	649	4	AT1G31812.1	ACBP (ACYL-COA-BINDING PROTEIN); acyl-CoA binding	Acyl-CoA-binding protein. Bind acyl-CoA esters and protect acyl-CoAs from degradation by microsomal acyl-hydrolases.	Identical to Acyl-CoA-binding protein [Arabidopsis Thaliana] (GB:P57752); similar to ACBP1 (ACYL-COA BINDING PROTEIN) [Arabidopsis thaliana] (TAIR:AT5G53470.1); similar to Acyl-CoA-binding protein (ACBP) (GB:Q39315); contains InterPro domain FERM/acyl-Co	80.43	92	16	1	50	319	1	92	9e-36	146
All.Contig_10	GGTGGACCATCACGTTGCTTCACGGTTCAAGACTCCGATGCGGTAGACGAGGATTTCAAGTTTCTATGCGATCTTTTCTGGTCGAACGGAGACGGGTTGCCTTTGGATTTGATCGAGAAGGTTTCCACGACGGTCAAGAGTATACTTCCGCTGCTACGTACGGATACAGAGTCTCTGATTGAACGGTTTAAAGCGGTGTGTCTCGAGAATCACGGTTCGGACAGAGGGAAGCTTCCGTTGCCGCCGACTTCTGGACCGTGGAGTCCGACAGAAGCAAACACGCTGTTGAGGGTTTTGTGTTATCGTTATGATGAGTCTGCGACTAAGTTTCTGAAGAGAACGTATAACTTGCCGAGGAAGCTAACTTGAGAATATGACGTAAAATCTACATTTGGGACT…	615	2	AT2G20010.2			similar to unknown protein [Arabidopsis thaliana] (TAIR:AT2G25800.1); similar to unnamed protein product [Vitis vinifera] (GB:CAO65466.1); similar to unnamed protein product [Vitis vinifera] (GB:CAO44019.1); similar to unknown protein [Oryza sativa (japon	93.44	122	8	0	1	366	831	952	9e-64	239
All.Contig_100	GAAAGGAGATAAAGATTGTGGCCAAAGCGATAAAAATGGCGGTTTCTCTCCCAAACTCGTTCCTACAGATCAATCCATGCGCTCCTTCTCTGGCAATCAAAAAGCCAATTACGGCGGCAGCGATTGGCGCGAGAGGAGGAGGAAAGAAACCGTCGGTGGTTCAAATAACGTGCAGGAAGAAGGATTTGCACCCCGAGTTTCACRAGGACGCCAAGGTTTACTGCAACGGAGAGCTCGTGATGACGACCGGAGGGACCAAGAAAGARTATGTGGTCGATGTTTGGTCTGGTAACCACCCGTTTTACCTCGGGAACAGGTCGGCTCTGATGGTTGATGCTGATCAGGTTGAGAAGTTCCGTAAGAGGTTCGCGGGGCTGTCGGAGATTATGGAGATTCCGG…	584	2	AT1G75350.1	EMB2184 (EMBRYO DEFECTIVE 2184); structural constituent of ribosome		Identical to 50S ribosomal protein L31, chloroplast precursor (RPL31) [Arabidopsis Thaliana] (GB:Q9FWS4); similar to unnamed protein product [Vitis vinifera] (GB:CAO61124.1); similar to hypothetical protein [Vitis vinifera] (GB:CAN64555.1); contains Inte	82.71	133	21	1	36	428	1	133	7e-58	219
All.Contig_1000	GAACTCAAGCCTATTGTATATTTGAATAAAAGACTCTCTCTCCTTCTCTCTGTTCACGCATCTTCATCTTTCACAGAGATGAAGTTGAGGAGAGATAACCAACTTTTGTTTTTTTTTGTTTCTGATATTTGATCAGATTTAGTTTTCGGATTAGCCGATSAATACTTCCRATTAGCGGATTTATCTCTATTCCGGTAGCGGAATTATYTTCGCGTTGGCRACTTTTGAAGTGTCTTCTTCAATCACCATCGAGCWGATCTTCACTCTCATCCTTCTCGGATCGTGGTTGAAGATAATAATCTCCAATCWTTTGATCGATGATAGTACTWTATGTCGCTTTCCATCAACTTTCTTCTATATCCYGTTGGTGATTGATCGGAAYYACTTGGTTTCACCGCK…	763	2	AT3G26680.3	SNM1 (SENSITIVE TO NITROGEN MUSTARD 1)	Involved in a SNM-dependent recombinational repair process of oxidatively induced DNA damage.	Identical to DNA cross-link repair protein SNM1 (SNM1) [Arabidopsis Thaliana] (GB:Q38961;GB:Q96280); similar to sterile alpha motif (SAM) domain-containing protein [Arabidopsis thaliana] (TAIR:AT2G45700.1); similar to DNA repair metallo-beta-lactamase [M	50	34	15	2	518	613	435	468	8	27.7
All.Contig_1001	GCCGCAGATTCGCATCAAAGCAGATAAGCCCACAAGTTCCAGCAGGCAACTTCGAAGTGGGTCATGTCTCATATAAATTCAACCTATTGAAATCAAGAGGTCCAAGAAGAATGATAAGCACACTCCGTTGCCCATCCTCATCACCTCCACCACCATCATCATCATCCACTGACCACCAAAACCCATGTGATGTTGTCACCAAGATCATGAAGAAACCCAACAAAGACGGTTCAGGGTTGACGATACTAAAGAACAAAGCTCCGAGATGGCACGAGCACTTACAATGCTGGTGTCTGAACTTCCACGGAAGAGTGACCGTTGCTTCGGTCAAGAACTTCCAGCTGGCTGGCGACCGTTGACCAGAGTCAACCGGGTGGTAAAGGTGATGAAGAGACAGTG…	652	2	AT1G53320.1	AtTLP7 (TUBBY LIKE PROTEIN 7); phosphoric diester hydrolase/ transcription factor	Member of TLP family	Identical to Tubby-like F-box protein 7 (TULP7) [Arabidopsis Thaliana] (GB:Q93VI8;GB:Q9MAG9); similar to AtTLP3 (TUBBY LIKE PROTEIN 3), phosphoric diester hydrolase/ transcription factor [Arabidopsis thaliana] (TAIR:AT2G47900.1); similar to AtTLP3 (TUBBY	87.72	114	14	1	3	344	209	321	3e-79	196
All.Contig_1002	GAWTGCATTGTAKGGATGCCCGGGCATTGAKAAGGAAGGACGCTTTMRGAGGCGAARGGCCATGGGGAGATACCGTCTGTGATCCATGGATCTCCGATCGGRAAACCGTATCCAAGCTCCGTGGCTARTCTGCGCTCTTTGGACTTTGAAAACTTAGCGAACTGAAACATCTMAGTAGCTAGAAGAAAGAAARAAAAWAGAAWAAAAAAAAWSATGTATGATTGGAGAAAATCGAATTGGTTGAAGATCTTACCAAGGAGGCGTTGAATGATGGAGAGAAAGCAAAAGACTACGTTGATGAGAAAAACGTGGAAACCAAAGACATCTGCATTGGATGAAGCTCAGAAAGTTTTGCATTATGGGAAGGATAAAGGAAACGAAGCTTGTAATGATAAGGAC…	748	2	AT2G42540.2	COR15A (COLD-REGULATED 15A)	A cold-regulated gene whose product is targeted to the chloroplast and constitutive expression increases freezing tolerance in protoplasts in vitro and chloroplasts in vivo. NMR and x-ray diffraction studies suggest that COR15a alters the intrinsic curvat	similar to COR15B [Arabidopsis thaliana] (TAIR:AT2G42530.1); similar to COR15a [Arabis pumila] (GB:AAS98217.1); contains domain PTHR23241 (PTHR23241); contains domain PTHR23241:SF10 (PTHR23241:SF10)	73.33	30	8	0	234	323	70	99	6e-05	44.7
All.Contig_1003	GAGGCGCATCCGTTATATTTGAGGAAGTTAGAAGACGTGGCCTGAAAGTTGCAGTTGTTGGAATCCCAAAAACAATCGATAATGAYATACCTGTGATAGACAAATCTTTTGGGTTTGACACAGCTGTAGAAGAAGCTCAACGAGCTATCAACGCAGCACATGTGGAAGCCGAGAGTATAGAGAAYGGTATYGGTGTTGTCAAGCTTATGGGTCGCTACAGCGGGTTCATAGCGATGTACGCTACTCTWGCRAGCAGAGAYGTGGACTGYTGTTTGATTCCGGAGTCACCATTTTACYTGGAARGAGAAGGYGGACTGTTTGMGTACATAGAGAAACGGCTCAAGGAGAGYGGTCACATGGTGCTTGTGATTGCAGAAGGTGCAGGGCAAGACCTTATGT…	1020	3	AT5G56630.1	phosphofructokinase family protein		similar to phosphofructokinase family protein [Arabidopsis thaliana] (TAIR:AT4G32840.1); similar to phosphofructokinase family protein [Arabidopsis thaliana] (TAIR:AT4G29220.1); similar to phosphofructokinase family protein [Arabidopsis thaliana] (TAIR:AT	84.52	155	23	3	430	891	336	485	3e-136	256
All.Contig_1004	GAATTCATATATTAATATATAATTCGTCTCTATTTTTATATAAATAAAAGAAAAATAACATGTTGATTATATCAAAATTATAGAACAATTAAGGAATTTTAACTTATCATGGGGAAAGACACTATTGCTGATATAATAACCTCTATACGAAATGCTGACATGAATAGAAAAGGAACAGTTCGGATAGGATCGACTAACATCACCGAAAGCATTGTTAAAATACTTTTACAAGAGGGTTTTATCGAAAACGTAAGGAAACATCGCGAAAACAATCAATATTTTTTGATTTTAACCCTAAGACATAGACGAAATAAGAAAGAATCCTATAAAACGATTTTAAATTTAAAGAGAATAAGCCGACCGGGTCTACGAATCTATTCTAACTCTCAACGAATTCCA…	630	2	ATCG00770.1		chloroplast 30S ribosomal protein S8	Identical to Chloroplast 30S ribosomal protein S8 (rps8) [Arabidopsis Thaliana] (GB:P56801); similar to ribosomal protein S8 [Capsella bursa-pastoris] (GB:YP_001123408.1); similar to ribosomal protein S8 [Lobularia maritima] (GB:YP_001123760.1); similar t	99.25	134	1	0	109	510	1	134	1e-70	262
All.Contig_1005	GTGTTTGGGGGTTACAGATCAATGAGTTGGCTCGAAGGTACCCTGGATTGATGTCGCTGAGAAGCGTCGATCTTTCACCGGCGAGTTGGATGGCTGTAGCGTGGTACCCTATTTACCATATACCTATGGGAAGGACCATCAAAGATTTGTCTACTTGTTTCCTCACTTATCACACTCTTTCATCTTCTTTCCAAGGTACTGCTACTACTAACACTTTTGATGTGTTATGTCCAGGGTCGGTCCTAGATATAGACAAGTGAAACATTGGCATATAGTTACCATTTAAAAAAAAATTACAATAAAGATAAATCCACAAATTTGTAAATAATTTTTTAAAAATTAAAATCTACATAATTTAAATTAAAATTTACAATAAACATAATTTGTTAAAAATTAAAA…	1096	3	AT4G03420.1			similar to unknown protein [Arabidopsis thaliana] (TAIR:AT1G03610.1); similar to unnamed protein product [Vitis vinifera] (GB:CAO24103.1); contains InterPro domain Protein of unknown function DUF789 (InterPro:IPR008507)	96.3	81	3	0	494	736	229	309	9e-30	127
All.Contig_1006	GACAAATCGATAAACCAATCATTCTCAATTCTATAGCTCTCTCGCGAATTACGATCAAAGATGCAGATCTTCGTTAAGACTCTCACAGGAAAGACCATCACCCTTGAGGTGGAAAGCTCCGACACCATCGACAACGTCAAGGCCAAGATTCAGGACAAGGAGGGAATCCCACCGGATCAGCAAAGGCTTATCTTTGCTGGCAAGCAGCTCGAGGACGGCAGAACCCTCGCTGATTACAATATCCAGAAGGAGTCCACTCTCCACTTGGTGTTGCGTCTACGTGGAGGTATGCAGATCTTTGTCAAGACCCTTACCGGGAAGACCATTACTCTAGAGGTTGAGAGCTCCGACACCATTGACAACGTCAAGGCTAAGATCCAGGACAAGGAAGGCATTCCT…	882	2	AT5G37640.1	UBQ9 (ubiquitin 9)	polyubiquitin gene with 4 ubiquitin repeats. The first ubiquitin repeat has 16 amino acid replacements.	similar to UBQ3 (POLYUBIQUITIN 3), protein binding [Arabidopsis thaliana] (TAIR:AT5G03240.3); similar to UBQ3 (POLYUBIQUITIN 3), protein binding [Arabidopsis thaliana] (TAIR:AT5G03240.2); similar to UBQ4 (ubiquitin 4), protein binding [Arabidopsis thalian	92.08	202	16	0	16	621	64	265	6e-114	354
All.Contig_1007	GACSAAGGAGAAGAGTCTCTCTCTCTCTCTCATAACTTTCTGAAGCAAACAGCTCGATYTGATTTCYCGAGATTTGATCGTTTSTTCTTGGATCGTTTACCACGGATCTGGATCYGGAGCTGTGTTARATGGCGTACGTGGATCATGCGTTCTCKATATCGGACGAGGACATGATGATTGGGACTGCRTACRCCGTGAATAACCGRCCGCCGGTTAAGGAGATCGCACTCGCGGTGGCGCTACTCGTGTTCGGAGCCTTAGGAATCGTCTCAGGCTTCTTCATGGCGTRCAATCTAGTTGGCGGTGATCGAGGCCACGGGATATTCTTCRTGGTCCTGGGGTGTCTGCTCTTCATTCCAGGGTTTTACTATACTCGGATSGCCTATTACGCTTACAAAG…	662	2	AT4G29850.1			similar to unknown protein [Arabidopsis thaliana] (TAIR:AT2G19350.1); similar to hypothetical protein [Vitis vinifera] (GB:CAN75495.1); contains InterPro domain Protein of unknown function DUF872, eukaryotic (InterPro:IPR008590)	89.32	103	11	0	129	437	1	103	1e-41	166
All.Contig_1008	GCGGTCCCTGGTTCTAGTTAAATCTTGCCCTAACGAAAAATGTCGTCCCGTGGCCGAGAAGTGGAAGTGACCATCTCATCAGCAAAGAATATCAAGAACGTGAACTGGCGCAACGGTCCAAACAAGCCATACGCCGTCGTATGGGATCGATCCAAAGTACAAATTCTCCACCAGAGTCGACGAAGAGGACGACACGTGTCCCTCGTGGAACCAGACATTTGTCATCCCTTTGCCTCCGGGCAACGACGACTACGACGATGACAAAGTCTTCATCGACGTGGTGCACGCGGGAGGCGAAGAGAACACAAAGCCCCTCATCGGCTCCGCTCATCTCAGCCTCCGTGATGTCATCGACGACGTCGGCTTCRGCGTCCCCGTGGAGAAAACCCTCAAACTCAA…	985	6	AT5G23950.1	C2 domain-containing protein		similar to C2 domain-containing protein [Arabidopsis thaliana] (TAIR:AT1G07310.1); similar to unnamed protein product [Vitis vinifera] (GB:CAO49504.1); similar to hypothetical protein [Vitis vinifera] (GB:CAN62171.1); contains InterPro domain C2 calcium-d	70.97	124	36	2	146	517	36	152	1e-54	159
All.Contig_1009	GAGGAAAGAACTCGACAAGAAGGTGAAAGGCTCAACGAAGAAGAAGAGCAAAAGCTCTGAAGAGAACGAGAAGCTGCCTTATGTTCACGTTAGAGCTCGCCGCGGTCAAGCAACAGATAGCCATAGCTTAGCGGAGTGAGCAAGAAGAGAGAAGATTAATGCACGRATGAAGCTACTACAGGAACTGGTCCCAGGCTGTGATAAGATTCAAGGTACTGCGTTGGTGCTGGATGAGATCATAAACCATGTCCAGTCTTTACAACGTCAAGTGGAGATGCTATCAATGAGACTTGCTGCAGTAAACCCCAGARTAGACTTCAATCTCGACACCTTATTAGCCTCAGAAAATGGTTCTTTAATGGATGGGAGCTTTAATGGTACAGCAATGCAGCTTGCTTG…	802	2	AT3G57800.2	basic helix-loop-helix (bHLH) family protein		similar to basic helix-loop-helix (bHLH) family protein [Arabidopsis thaliana] (TAIR:AT2G42300.1); similar to unnamed protein product [Vitis vinifera] (GB:CAO23529.1); contains InterPro domain Basic helix-loop-helix dimerisation region bHLH; (InterPro:IPR	84.24	184	29	1	74	625	199	379	5e-82	300
All.Contig_101	GGGAACTCCGAAGGTTGAGAGAGCTTTCGCATTCAGATTTGACAGCAGCGAAAAATCTAAGATGGCATTTCTGAGATCCCTCTGCCGTACCGCYGCGGCGGCCTCCTCCGTTGCCACGCTCCGATCATCCAGATCCGCCGCTCCAAGTCAGCTGTTGCGCCATCGTTTCCTCTCCACGCGAGGATTCTTCGCTGTTTCCTCGTGTCCTTCTAATCGAACTCCTTACGATTTTCGGTATCCTCGAGCAATGGATATAGGACAAGTGCGCAGCTTTAGTGAAGATGTGTCTCACATGCCCGAAATCAAAGACGGTGATGTTCTGAAAGCATTCAAAGAACTGATGGCTGCAGATTGGGCAGCGCTACCTTCTGCTGTTGTTAACGACGCCAAAAACGCAGT…	966	7	AT1G47420.1			Identical to Uncharacterized protein At1g47420, mitochondrial precursor [Arabidopsis Thaliana] (GB:Q9SX77); similar to APFI, carbonate dehydratase [Arabidopsis thaliana] (TAIR:AT1G47260.1); similar to unknown [Populus trichocarpa] (GB:ABK92861.1)	70.42	240	61	2	89	778	18	257	1e-85	313
All.Contig_1010	GATATAGAAATAGTTAGTATACACTATTTAACAAGTCTATGAGTCCCATGCACTTGGCTTACGTAACGRGAACGCATTCATCATCACCTCTCATTTTCACGTCTCCTCTTCAYYCTTTAGCCTATAACTATCATTCAGCGTAATCYACACAAACTCTTCTTTTTATTTTCCCTTTGATCTAATCCAAAAAAAACTCGTCGATCATAACATGCCGGGAAGTTATCAYCGCCRGGGATCCGACGTGTCAGTCATCATYTTCACGGTGATGATCACGTTGCTAACGTGTCCAGTAATCATCAACGCTTCATCATCATCAGAGKCRGCCAATACGAGGAAGCTCGACGAGGTAGATCCCATAAAGTGCTCTCCAAGCTGCGTCCAAAACCCTCCTCCGCCATC…	660	3	AT1G23040.1	hydroxyproline-rich glycoprotein family protein		similar to proline-rich family protein [Arabidopsis thaliana] (TAIR:AT1G70990.1); contains InterPro domain Glutelin; (InterPro:IPR000480)	76.87	147	31	4	209	640	1	144	7e-25	110
All.Contig_1011	GGAAACRAAACGAGAAACGAAAGAGAAGAAGTATTATTCCTCATAGAGGCAAAAACAAAAAAGAATACGATTCCGCCTCGATCCTTCATCTGATCGAATCGATTTTGTTTCTTGTATCAGCGATCGGGATCATCTGATTGCGATCTTTCGAAATCGAGAAACCTTTGGTGTGATCGAGGAATCACCACCATGTTCAATTTCTGGGGATCAAAGGAGCAGCAACTTGGGGGGGAGTCTCGTCCTTCTTCTTCAGAACAATCTCCACAACAACCTTGGTATTCTCCTTCTCTTGTCACCTCTCCTAGCTCATCCAGGCCTCAGTCATCAGGTGGGCAGATCCCATCACATGTTTCGCCAGGTGAAGCTGCCGGCATTATTGCTCTTTTGAAAGACAAAAGT…	598	3	AT2G36680.1			similar to unknown protein [Arabidopsis thaliana] (TAIR:AT3G53120.1); similar to unnamed protein product [Vitis vinifera] (GB:CAO62968.1); contains InterPro domain Modifier of rudimentary, Modr (InterPro:IPR009851)	66.91	136	45	1	190	597	1	132	3e-39	157
All.Contig_1012	GATTTGTACAACTGTAGAAGGAGAGGAAGAAGAAGAAGAAGGAGCGATGGCATGGAGAGGAAACATATCGAAGTCTCTGAAAGAGCTCAGGATTCTCCTCTGTCAGTCTTCCCCAGCTAGCGCTTCCACCAGGACGTTCGTGGAGAAGAATTACAAAGATTTGAAGACTCTGAACCCTAAGTTCCCTTTCCTGATCCGCGAATGCAGTGGGATCCAGCCTCAGATGTGGGCTAGATATGATATGGGAGTGGAGAGGTGTGTGAACTTGGACGGTATGAACGAGTCACAGATTCTCAAGTCTCTTGAAGACCTTGTGAAAGCCGGCGGAGCTACAAAAGCCTAAAAGGTTCTTCTTTTTTTTAAAAAATCTATTTAGATGATCCCGAATAAGATACAAAC…	538	3	AT5G47890.1	NADH-ubiquinone oxidoreductase B8 subunit, putative		similar to unknown [Populus trichocarpa] (GB:ABK92741.1); contains InterPro domain Mitochondrial ribosome (InterPro:IPR007741); contains InterPro domain NADH dehydrogenase [ubiquinone] (complex I), alpha subcomplex, subunit 2 (InterPro:IPR016464)	85.71	98	14	1	47	340	1	97	1e-43	172
All.Contig_1013	GTTGGTTGTTAGGAGATAAGAGGATGGTGTTCACAGAGAGTTAAACAGCAACAAAAGTATTTATCTTCTTCTSTTTGCRTCAAAGTTAGATCTCTCCTCCATCATAATCCTCCAACGATGACAAGCATAGCTGCAACCGGTCTCAACGTCGCGACYCCAMGAGCGTTCGTTCGACCGGYGGTGACTMGTCTATCYGCCCCKGTYCGYTTGAACTACCCGTGGAAATTCAGTTCGGTGAAACGGATGGTTATGTCGGTTAAGGCGACATCGGAAGGAGAGATCATATCGGATAAGGTGGAGAAGAGTATTCAGGAAGCGAAGGAGACTTGCGCCGACGATCCGGTGAGCGGAGAGTGTGTGGCAGCGTGGGATGAGGTGGAGGAGCTGAGTGCAGCGGCG…	645	5	AT2G47400.1	CP12-1 (CP12 domain-containing protein 1)	CP12-1 encodes a small peptide found in the chloroplast stroma. It belongs to the CP12 gene family thought to be involved in the formation of a supramolecular complex with glyceraldehyde-3-phosphate dehydrogenase (GAPDH) and phosphoribulokinase (PRK) embe	similar to CP12-2 [Arabidopsis thaliana] (TAIR:AT3G62410.1); similar to putative chloroplast protein CP12 [Brassica rapa] (GB:ABL97989.1); contains InterPro domain Protein of unknown function CP12 (InterPro:IPR003823)	86.51	126	17	3	118	495	1	123	8e-56	213
All.Contig_1014	GACACCACACGTACGATTCCTCTGCTCTCCTCTCTCTCTCTCTCTCTACAAACCCTGCGATCCTCTTCCTCAAGAATCGAGTATGAAAGGAGGTAAATCGAAGACTGAAACCAGGAGCTCCAAGCTCCTCTGTGGCTAAGAAGCCTGCTAAAGCAGCAGGTCGTAGCAAAGCGGCGGCTAAGGATCCTAACAAACCTAAGAGGCCAGCCAGTGCCTTCTTCGTTTTCATGGAGGACTTCCGTCAGACTTACAAGAAGGATCACCCCAACAACAAATCTGTTGCTGCTGTTGGTAAAGCTGGTGGAGAGAAGTGGAAGTCGTTGTCTGACTCTGAGAAGGCTCCCTTCGTAGCTAAGGCTGATAAGCGCAAGGTTGAGTATGAGAAGACCATGAAAGCCT…	823	2	AT1G20696.2	HMGB3 (HIGH MOBILITY GROUP B 3)	Encodes a protein belonging to the subgroup of HMGB (high mobility group B) proteins that have a distinctive DNA-binding motif, the HMG-box domain. The motif confers non-sequence specific interaction with linear DNA and structure-specific binding to dist	similar to HMGB2 (HIGH MOBILITY GROUP B 2) [Arabidopsis thaliana] (TAIR:AT1G20693.2); similar to HMGB2 (HIGH MOBILITY GROUP B 2), transcription factor [Arabidopsis thaliana] (TAIR:AT1G20693.1); similar to HMGB2 (HIGH MOBILITY GROUP B 2) [Arabidopsis thali	80	15	3	0	83	127	1	15	2e-36	27.3
All.Contig_1015	GAAGAGAAGAAAACCGATCAATCATGAAGCTCTCTTTCTCTCTCCCTTCCAAATCGAAACCCAAAGTCACAGCCGCCGGCGCCGTCGATGACGGTACAAGCAAAGAGTTCGTCACGGAATTCGATCCTTCGAAAACCCAAGCTGATTCCACTCCCAAACACGTCATCCCTCCGATCGACAACACATGGAGGCCTCACAAGAAGATGAAGAATCTCGATCTCCCGCTCCAATCCGGCAACACCGGTTCGGGTCTCGAATTCGAACCCGAGGTTCCTTTAACCGGTTCCCAGGAGAACATCACCTACGGTTTGAAGCTGCGTCAGAAAGCAAAGGACGACGAAGAAGAAGAAGATCGGAACCTAGCTCCGATAGAGCAGCTTATGATGCAGAGTTTGAGGA…	751	2	AT1G33520.1	MOS2 (MODIFIER OF SNC1, 2); RNA binding / nucleic acid binding / protein binding	Has single homolog in Arabidopsis, also homologs in human, mouse and C. elegans; contains one G-patch domain (known to mediate RNA-protein interactions) and two KOW domains (may bind RNA and/or protein); localized to the nucleus; mutant suppresses high SA	Identical to Protein MOS2 (MOS2) [Arabidopsis Thaliana] (GB:Q9C801); similar to KOW domain-containing protein / D111/G-patch domain-containing protein [Arabidopsis thaliana] (TAIR:AT4G25020.1); similar to unnamed protein product [Vitis vinifera] (GB:CAO45	71.06	235	55	3	81	746	25	259	1e-88	322
All.Contig_1016	CTACGAATTTTCCAGGAAAGTGAGTTGAATTGATGCTTCTTCTTTTTGTTATGTGGAGAGAAAGAGCAGGGGGGATGGAGCATGTGCCGGGATCGTTCGGCACCAGCGCCAGTTTCGCTCTCCGTTTCGGCCAAATCATCTTCTCTTCCGCTTCTCTCATCTTCATGTGTTTGGATTACGACTTCTATGACTTCACTACCTTCTGGTAATTCCCCTACACGTTTCCTCCATGTTCTTGTTCGATCATGATAAGAGGTTCTGTACTATTGTCCTCCTGCGACTTTCTGGGTTCTGAAAATTTCTTGAATCGATGGAAAGATGATTCTTAGAAACAAAATATGTGAAATTTGGACAAGGGTTTCTCTCTGTTTTGTATTATCGACACATAATTGTTGGAAA…	1154	6	AT3G50810.1	integral membrane protein, putative		Identical to UPF0497 membrane protein At3g50810 [Arabidopsis Thaliana] (GB:Q9SVL7); similar to unknown protein [Arabidopsis thaliana] (TAIR:AT4G37235.1); similar to unnamed protein product [Vitis vinifera] (GB:CAO41610.1); contains InterPro domain Protein	53.23	62	29	1	555	740	32	89	4e-10	62.8
All.Contig_1017	GTCCCAGGTGGTTGTCTTSATCAGACTAGACTGTGGAACACAACTAGAGTTACGGCTAGGGCTTCTCCCTGAGTCGCCGCCACCACACCACCACTGAAGATGACTGGCAAGGCCAAGCCKAAGAAGCATACAGCTAAGGAGATTCAAGCCAAGATCGAYGCTGCGTTGACCAACAGAGGCGGAGGAAARGCGGGAATAGCYGAYCGGACSGGAAAGAAGAAAGGTGRTCACGCTAAGTTYGAGTGTCCTCACTGCAAAATCACGGCTCCKGATCTCAAGACCATGCAGATCCATCACGAGTCAAGAAGCATCCSAAGATCCCTTACGAAGAGTCCAAGCTCGTGAATCTCCATGCKGTTTTGGCTCCAGTGGCTGAGTCCAAACCTAAACCTGGAATCA…	616	5	AT3G02790.1	zinc finger (C2H2 type) family protein		similar to zinc finger (C2H2 type) family protein [Arabidopsis thaliana] (TAIR:AT5G16470.1); similar to unknown [Populus trichocarpa] (GB:ABK94760.1); contains InterPro domain Zinc finger, C2H2-like; (InterPro:IPR015880)	92.75	69	5	0	100	306	1	69	2e-48	137
All.Contig_1018	GAATACAGATAGAACTTTGGTAGCTTTGTTTATTTGTCATCGAAAGCAGCATCGAGTTCTTGAGAAGTGTGCTTCGATCGAAGAAAAGCTTTCGTCTTTGTAATCAACAGGGTGTGGAAGAAGAAGTAATGGCAAAAAGCTCGTTCAAGCAAGAGCATGACCTAGAGAAGAGAAGCGCAGAGGCTGCTCGGATCAGAGAGAAGTATCCAGATAGGATTCCGGTGATTGTTGAGAAGGCTGAGAAGAGTGATATACCGACCATCGACAAGAAAAAATACCTAGTCCCGGCTGATTTGACAGTGGGGCAATTCGTGTATGTCATTCGCAAAAGAATCAAACTGAGTGCAGAGAAGGCTATCTTTATCTTTGTGGACAATGTTCTTCCTCCAACTGGTGCGT…	760	3	AT4G16520.2	ATG8F (AUTOPHAGY 8F); microtubule binding		Identical to Autophagy-related protein 8f precursor (ATG8F) [Arabidopsis Thaliana] (GB:Q8VYK7;GB:O23496); similar to AtATG8e (AUTOPHAGY 8E), microtubule binding [Arabidopsis thaliana] (TAIR:AT2G45170.2); similar to AtATG8e (AUTOPHAGY 8E), microtubule bin	94.21	121	7	0	129	491	1	121	4e-60	228
All.Contig_1019	GACAAGAGAAACTCTTAACAGATCCTCCGCGCGCTGGGCATACCTCTTCCGTGCGTCTTTCTCGTGGCAGGAACAGAACAACAGGGAAAGACCCGGCCGACCTGCCCAGGGCTCGAGGGCGAGCTTTATTTAAGAGAGAATGGGGAGCGAATCGAAAGGCTTCCGTTTTCGTTCTTGGTTTGGTTCGGGCTCCTCTCGATCTTTTTCGTAGTAGGGAAGGGGGAAGGAGTCTAAATCTATGGACATTAATGAACCATCATTGATGGACGTTGCACATGACACGATCAATTCGACTCAAGGTCCGGCGCTAATAGAGGTTGCTTACTTTCCTAGTAGCGAAGGAAAAGGGCAGGGCTTTTTTCGTGGTAATAGTGGGCGGGTCTCCTTTCGAAGTAAAGG…	762	2	AT5G46280.1	DNA replication licensing factor, putative		Identical to DNA replication licensing factor MCM3 homolog (MCM3) [Arabidopsis Thaliana] (GB:Q9FL33;GB:O65400); similar to PRL (PROLIFERA), ATP binding / DNA binding / DNA-dependent ATPase [Arabidopsis thaliana] (TAIR:AT4G02060.1); similar to replication	32.43	37	25	0	601	711	286	322	8	27.7
All.Contig_102	GASGCCGCGTCTTTGTGTGTTTATCATCAACACAACAGATCTGATCGCCTTTTAAGTCGTCTCTTCTCCCCCAAACCAAAACAATGGCTGAGGCAACACCAGCTTTGAGGAAGCCTGTGTTCACMAAGGTTAATGAGCTGAGACYTGGAACCAATGGTCAYTCATTGAATGTGAAAGTTGTCAGCTCGAAGATGGTGATGCAGAGAGGTGGWGGWGGAGGAGGTCGTCCCARTGGTCCTCAGGCTCGTCAGATGAGGATTGCWGAGTGTCTTGTTGGTGATGAGACTGGAATCATTATCTTTACTGCACGAAATGATCAAGTGGATTTGATGAAAGAAGGCAAGATTGTGACCCTGCGCAACGCCAAGATCGACATGTACAAGGGATCTATGAGGCTTG…	747	2	AT1G10590.2	DNA-binding protein-related		similar to DNA-binding protein-related [Arabidopsis thaliana] (TAIR:AT1G23750.1); similar to unnamed protein product [Vitis vinifera] (GB:CAO66056.1); contains InterPro domain Nucleic acid binding, OB-fold, tRNA/helicase-type; (InterPro:IPR004365); contai	87.94	141	17	1	84	506	1	138	2e-60	229
All.Contig_1020	AGCATCTCACTCATCCACAGCCAGTCTAGAGGCTGCGGTGGCGTCACTAGAAATTCCTGGTGGTGTTAACTTATATGGGGTTTCTGCAAGAGACCGAGCCCGCTTCGCAGGATCTGGTTTAGCGGGAGGTCTTGCCTCTCGTAACGCGCAACAGGAAGCTGGAACTGATGCTCAGCCTGTGGTAAACAGACTCCCCTCTGAACTGGCTTCTTCGATTGCTGCTGCAGAGTTGCCTTGTACTGTCAAACTTAGAGTGTGGGCACATGACATCAAAGACCCATGTGCAATACTAAGGTCCGACAAGTGCCGATTAACAATACATCACGCTGTTCTTTGCAGTGAGATGGGAGACCATTTTTCGCCATGTGGGAGATATTTAGCAGCTTGTGTTGCATGTGT…	1139	2	AT1G04140.2	transducin family protein / WD-40 repeat family protein		similar to transducin family protein / WD-40 repeat family protein [Arabidopsis thaliana] (TAIR:AT5G43930.3); similar to transducin family protein / WD-40 repeat family protein [Arabidopsis thaliana] (TAIR:AT5G43930.2); similar to transducin family protei	86.69	323	36	2	2	949	471	792	2e-138	489
All.Contig_1021	GGTAGACAAATTGAGAATTAAAAGATTCTTGAGGGGTTAACAATTGAGAAGATTATACAATTCATTACGTTGATCTTCCTCAAGAAAAGTCTCGTCTTCTACGGAATGGATTATCCTCGGAGCTTTCTCGCATTTTCCCTCTGTCTCATCCTGATCCTCCCTCGAGCTTCCTCCGCGTCGATACGCTTCCTCCCTCGATGGAGTAACAGAGATGGGTCTGTGATAAAGCAGAAGACGAGTGCTTCGTCTCTTGTGTTTGATCCAACTCGTGTCACTCAGCTCTCTTGGACTCCAAGGGTGTTTTTATACAAAGGGTTTCTCTCAGATGAGGAATGTGACCATTTTATCAAATTGGCGAAAGGGAAGCTTGAGAAGTCAATGGTTGCGGATAATGACTCT…	993	2	AT3G28480.1	oxidoreductase, 2OG-Fe(II) oxygenase family protein		similar to oxidoreductase, 2OG-Fe(II) oxygenase family protein [Arabidopsis thaliana] (TAIR:AT3G28490.1); similar to unnamed protein product [Vitis vinifera] (GB:CAO14854.1); contains InterPro domain Prolyl 4-hydroxylase, alpha subunit; (InterPro:IPR00662	84.98	293	43	1	118	993	4	296	2e-146	514
All.Contig_1022	GCCCAGKACCCTGYCCTCTCCGTACTCACAAACTCTCTCTATTTCTTCTCTGTTTATCTCTCTAACACATGAGAGCAAAATCTTCTGACATTCTCAGCCGCTGATTATATCGCCACCGTAGATGGAGAACACTCAAGAATACTCGCCGCCGCACATGGACGCTTCTCGGCCGTCACTAGGATTCCCTCTAGGCACAGCTCTGCTTCTCATAATCATTTTCAGCCTCTCTGGAAYATTCTCTTGTTGTTACCATTGGGACAAACATCGTTCTCTCCGCCGTTCTTTGGCCAATGCATCCGGTCATYCCTCCGCCGCCTCTGCTGACATAGAGTCCTCTCCGTTCAAACCTAGACTCCCTTTTCCGGATTTGAAGAAAAAACAGAATCTGAGCGTTACGGT…	602	2	AT5G65660.1	hydroxyproline-rich glycoprotein family protein		Identical to Uncharacterized protein At5g65660 [Arabidopsis Thaliana] (GB:Q9LSK9); similar to hydroxyproline-rich glycoprotein [Medicago truncatula] (GB:ABY48133.1)	80.65	124	24	1	122	493	1	119	3e-44	174
All.Contig_1023	TGGTTCTGGTTACAATAATACTAATAACAATAATCATCAACAACACATGTTGTTCCCACATATGAGCTCTCTTCTTCCTCAAACGACTGAGAATTGCTTCCGATCCGATCATGATCAGCCAACCAACGCATCTGTTAAATCAGAAGCAAGCTCCTCAAGAATCAATCACTACTCTATGTTGATGAAAGCCATCCACAATACTCAAGAAGCTAACAACAACAACAACAACAATGATATRGAATCCATGAAAGCTAAGATCATCGCTCATCCTCACTACTCCACCCTCCTACACGCCTACTTGGACTGCCAGAAGATTGGAGCACCACCTGAAGTGGTTGATAAAATTACGGCGGCAAGACAAGARTTCGAGGCGAGGCAGCAGCGGCCAACAGCGTCCGT…	733	2	AT4G08150.1	KNAT1 (BREVIPEDICELLUS 1); transcription factor	A member of class I knotted1-like homeobox gene family (together with KNAT2). Similar to the knotted1 (kn1) homeobox gene of maize. Normally expressed in the peripheral and rib zone of shoot apical meristem but not in the leaf primordia. It is also expres	Identical to Homeobox protein knotted-1-like 1 (KNAT1) [Arabidopsis Thaliana] (GB:P46639;GB:Q8S3L9;GB:Q8S3M0); similar to STM (SHOOT MERISTEMLESS), transcription factor [Arabidopsis thaliana] (TAIR:AT1G62360.1); similar to BREVIPEDICELLUS [Cardamine hirs	82.72	81	14	1	489	731	215	294	1e-105	138
All.Contig_1024	GGCCTTCCATTATKATTATCATCCACTTGCTGAAGATTCCCCACTAGAAAGAAAGAAGCATACGATTCTCTCCTTACCATCCTGCTTCGATTCYCACCAAACATGGAAGCCCTGATTCACCACTTCACTCTCCTCTCCGACCAAGCCCTTGTCGACAAAACATTCGACCCTGCCACGATCGAAGACCTCATGCGTCTCTTCGAAGTCGATTCCTACAAGGCTTGGGCAGCTCTCGAAGCCGAGCAACAACAAGAGCTCGAAGCCGCTGAAGAATCTATCCGCGAAGCCGAAGCTGAACTCGATCGGGATATGGAGTGGGGGATGGAGGAGTACAGGCGGACGTTGGAGGAGATGGAGAGGATGGAGGCGGCGGAGCTTAAAGAGCTTGAGGAGAAGGCG…	731	2	AT1G60870.1	MEE9 (maternal effect embryo arrest 9)		similar to hypothetical protein MtrDRAFT_AC155889g19v2 [Medicago truncatula] (GB:ABN08291.1)	92.52	147	11	0	103	543	1	147	2e-21	99.8
All.Contig_1025	GGCATGAGCTTATTAGACAAAGGGAAACGGAACAGTGTGCAAGAGAGATTCAAAAATGTCGAAGATAGCTTTAGGGAACGAATCACTTGTTGGGTCTTTGACTCCATCTAACAAGAAGTCGTACAAAGTGACCAATAGGATTCAAGAAGGGAAGAAGCCTCTGTATGCTGTTGTTTTCAACTTCCTTGATTCTCGTTTCTTCAATGTCTTCGTCACCGCTGGTGGAAATAAGATTACGCTGTACAATTGTCTTGAAGATGGTGCCATATCTGCATTGCAATCCTATTCTGGTGAAGATAAGGAGGAGTCGTTTTACACTGTAAGCTGGGCGTGTGGCGTTAAGGGGAACCCATTTGTTGCGGCTGGAGGAGTGAAAGGCATAATCCGAGTCATTGACGT…	777	2	AT3G20740.1	FIE (FERTILIZATION-INDEPENDENT ENDOSPERM 1); nucleotide binding / transcription factor	Encodes a protein similar to the transcriptional regular of the animal Polycomb group and is involved in regulation of establishment of anterior-posterior polar axis in the endosperm and repression of flowering during vegetative phase. Mutation leads endo	Identical to Polycomb group protein FERTILIZATION-INDEPENDENT ENDOSPERM (FIE) [Arabidopsis Thaliana] (GB:Q9LT47;GB:Q9XF44); similar to coatomer protein complex, subunit beta 2 (beta prime), putative [Arabidopsis thaliana] (TAIR:AT1G79990.2); similar to c	92.92	240	17	0	56	775	1	240	2e-131	465
All.Contig_1026	GGGGATTACTCAGAGCAAGAAGAAAGATCAACGATATCTGAATCTGGAAGCTCTAACTCGTACGATCAGCAACAACCCTCTTTCGCCGACGAGCACGGGCTCATGGAGCTGCTTGAAGGCGATAGAGCTTACGATCTTATCTACCGTAACTGTAAATCTGCTCTCGGAGACCAATGCGAGCTTCTCTCGATTCTGAGAAACGGGTTTGGTAACGTTGGATCTCGTGCTAAGCTCAAGGCTTTCCAGGTTTTTCAAGAGGCGGTGGAGATGAAACACGCCGGTGAAGAAGGCGGCGGCAAAGCTAGAGTTAAGTACGGTTGGTGCGCCGTCAAGAAAACAGAGTTGAAGTCGGTTCTKGAATAYGGKTTTAGCCAGCCRAGWAACGAYGGWTSTTATGGY…	947	2	AT5G62520.1	SRO5 (SIMILAR TO RCD ONE 5); NAD+ ADP-ribosyltransferase	Encodes a protein with similarity to RCD1 but without the WWE domain. The protein does have a PARP signature upstream of the C-terminal protein interaction domain. The PARP signature may bind NAD+ and attach the ADP-ribose-moiety from NAD+ to the target m	similar to SRO4 (SIMILAR TO RCD ONE 4), NAD+ ADP-ribosyltransferase [Arabidopsis thaliana] (TAIR:AT3G47720.1); similar to unnamed protein product [Vitis vinifera] (GB:CAO64333.1); contains InterPro domain Poly(ADP-ribose) polymerase, catalytic region; (In	76.49	302	69	5	4	903	13	308	1e-128	456
All.Contig_1027	GCTCTCGAGGAGTACGCTGAAGCTGTTGTAGCTTCTGTTAGGTTTGTCTGTGAGAGGAGATCAGTGAAGCATCCTGTGATATGCAGCGAGAGCGGAAGAGCTATCGTCTCTCATCACTCAGTGTTGATCTTTGAAGCTGTCTCAACGGTTAAACATCAAGCTGATCATGATGATATTCAGTTTTTGCTCGAAGGTGATGATTACGAGGAGCTGTACTCTGCTGTGATGCGTGGGGATCAAGAAAGGTGTTTACTTTACGTTGACAAGCTGAAGCAGAGGTGTGTTGAAGGCTTTAAAGACGGTGTTTTGAGCATTGAGCAGTTAGCTTCCGTTGATGGGTTATGCGAATGGGTTTTAAAAGCTATAGGCGGGTCGGATCCGGTTCAGACTTACAATATC…	1235	6	AT4G34710.2	ADC2 (ARGININE DECARBOXYLASE 2)	encodes a arginine decarboxylase (ADC), a rate-limiting enzyme that catalyzes the first step of polyamine (PA) biosynthesis via ADC pathway in Arabidopsis thaliana. Arabidopsis genome has two ADC paralogs, ADC1 and ADC2. ADC2 is stress-inducible (osmotic	Identical to Arginine decarboxylase 2 (SPE2) [Arabidopsis Thaliana] (GB:O23141); similar to ADC1 (ARGININE DECARBOXYLASE 1) [Arabidopsis thaliana] (TAIR:AT2G16500.1); similar to arginine decarboxylase 2 [Pringlea antiscorbutica] (GB:AAR08423.1); similar	81.23	357	52	6	1	1026	356	711	6e-158	553
All.Contig_1028	CTGAGTGGGACGATCCTACTGCTGGACGAGTGGGACCACCACTTCCATGTGGTTACATTAAGCTTGTTTCTTGGGAAGAAGGTGGCTATAGAGTTTCAGACAAACCAATGCCTCGGGGGGAGATTGTGGTAGGTGGTAACAGTGTAACAGCAGGTTACTTCAACAATCAAGAAAAAACAGATGAGGTTTACAAGGTTGATGAGAATGGCACGAGGTGGTTTTACACAGGAGACATTGGGAGATTCCACCCTGATGGATGTCTTGAAGTTATTGACAGAAAGAAAGATATCGYTAAACTTCAACACGGGGAATATGTATCCCTTGGAAAGGTGGAGGCAGCTTTGGGTTCAAGTAATTACGTTGACAACATTATGGTACACGCAGACCCAATGRACAGCT…	816	3	AT2G04350.2	long-chain-fatty-acid--CoA ligase family protein / long-chain acyl-CoA synthetase family protein (LACS8)		similar to LACS9 (LONG CHAIN ACYL-COA SYNTHETASE 9), long-chain-fatty-acid-CoA ligase [Arabidopsis thaliana] (TAIR:AT1G77590.1); similar to unnamed protein product [Vitis vinifera] (GB:CAO41136.1); similar to hypothetical protein OsI_018747 [Oryza sativa	90.52	232	22	0	3	698	489	720	2e-123	438
All.Contig_1029	GASACACATATTCACTCATACAAGATGGATATTCTGACGATATGTGAAGCAAACAATGTTCCTCTAACACCCATRACGTTCTTGAAACGAGCTTCGGAATGTTACCCCAATCGAACCTCCATAATCTACAGACAARGTCGTTTCACTTGGCCCCAGACCTATGACCGTTGCTGTCGACTGGCCGCCGCTCTTCTCTCTCTTAATATCACCCGAAACAACATCGTCTCGATTTTGGCCCCAAACGTACCCGCCATGTACGAGATGCATTTTGCCATTCCAATGACCGGGGCCGTACTGAATCCTATTAACACTCGCCTGGACGCCAAAACCATAGCCATCATCCTACGCCACGCCCAGCCAAAGATCTTATTCGTTGACCATGAGTTTGCTCCTTTGACC…	740	2	AT1G66120.1	acyl-activating enzyme 11 (AAE11)		similar to AMP-dependent synthetase and ligase family protein [Arabidopsis thaliana] (TAIR:AT1G68270.1); similar to acyl-activating enzyme 12 (AAE12) [Arabidopsis thaliana] (TAIR:AT1G65890.1); similar to BZO1, benzoate-CoA ligase [Arabidopsis thaliana] (T	78.89	199	42	0	25	621	1	199	7e-98	308
All.Contig_103	AAGCAGTGGTATCAACGCAGAGTTGCCATTACGGCCGGGAGACAGCGTTTCATTATCACTTCCGACAAAACTCTTTATACCTTTCCGCACTYCCTTTCCRCCGACYTCCTCCATGGCTCCGATTGCTGTTGGCGATGTTGTACCTGACGGATCTATCTCCTTCTTCGACGAGAACGATCAGCTCCAGACTGTCTCCGTTCACTCCCTCGCCGCCGGTAAGAAGGTCATCCTCTTCGGTGTCCCTGGTGCTTTCACCCCCACCTGCAGYATGMAGCATGTGCCTGGATTCATCGAGAAAGCAGAGGAGCTGAAGTCAAAGGGTGTTGACGAGATCATTTGCTTTAGTGTGAATGATCCGTTTGTGATGAAGGCATGGGGGAAGACGTACCCAGAGAACAA…	900	169	AT1G65980.1	TPX1 (THIOREDOXIN-DEPENDENT PEROXIDASE 1); antioxidant	thioredoxin-dependent peroxidase	Identical to Peroxiredoxin-2B (PRXIIB) [Arabidopsis Thaliana] (GB:Q9XEX2); similar to TPX2 (THIOREDOXIN-DEPENDENT PEROXIDASE 2), antioxidant [Arabidopsis thaliana] (TAIR:AT1G65970.1); similar to type 2 peroxiredoxin [Brassica rapa subsp. pekinensis] (GB:	96.3	162	6	0	113	598	1	162	4e-76	281
All.Contig_1030	GATATATATTTACTTAAAGATACTTAGTATAATTATATAATATATATAATAGAAATAATAAAACTACAAGATATTCTAAGATATCTTTAGAATTCAGAATATAACAATAACAGGTACAAATATTAAATTGAGGTACCCCATTTTATGACAACTTTCAACAACTTACCCTCTATTTTTGTGCCTTTAGTAGGCCTAGTCTTTCCGGCACTTGCAATGGCTTCTTTATTTCTTCATATTCAAAAAAATAAGATTTTTTAGATCGGATGAGACCGAATCGTATAACTCCCCTTTTTATTTTAAAAACTTCGATTTGATAAGACCCATTTGGTAGAATATTGTATAACACATAGATTCCTACAAACATAACYAAAAAAAGTTTTTATGCATGTGTAAACGTAT…	620	3	ATCG00510.1		Encodes subunit I of photosystem I.	Identical to Photosystem I reaction center subunit VIII (psaI) [Arabidopsis Thaliana] (GB:P56768); similar to PSI I protein [Arabis hirsuta] (GB:YP_001123209.1); similar to PSI I protein [Aethionema grandiflorum] (GB:YP_001123040.1); contains InterPro do	97.3	37	1	0	145	255	1	37	2e-14	75.5
All.Contig_1031	GGGTACTTTGTGTGGTCGCTTATGGATGGACTAKAGTGGGAAGATGGATACAAGACTAKGTCTGGACTCTACTATGTCGACTATGCTAACAACATGGGAASGCACGAGAAACAGTCAGCTAAGTGGCTCTCTAAKCTCCTTGAGAAAGCTCCTATTCAGTCCAAGGTTGATTTGGAATCAASGAASGAGTTATAAATGATCGGAGAAGAAACTATAATATCTCTGTTTAACCGTTCATATTATGTAATGTGTGTGTTCCTTTGTATCTTCAMAAGTGTTTAAGAGACCGATATATGTAGTTATGTAATAGTAATCAATWAATAAAGAAGAACCTTGTGTCT	341	2	AT3G03640.1	GLUC (Beta-glucosidase homolog); hydrolase, hydrolyzing O-glycosyl compounds	Encodes beta-glucosidase (GLUC).	similar to glycosyl hydrolase family 1 protein [Arabidopsis thaliana] (TAIR:AT3G21370.1); similar to beta-glucosidase [Brassica napus] (GB:CAA57913.1); contains InterPro domain Glycoside hydrolase, catalytic core; (InterPro:IPR013781); contains InterPro d	78.79	66	12	1	1	192	466	531	1e-23	104
All.Contig_1032	AAGGATACTGATATCTTGGCAGCATTCCGAGTAACTCCTCAACCCGGAGTTCCACCTGAAGAAGCAGGGGCTGCGGTAGCTGCTGAATCTTCTACTGGTACATGGACAACTGTGTGGACCGATGGGCTTACCAGCCTTGACCGTTACAAAGGACGATGCTACCACATCGAGCCCGTTCCAGGAGAAGAAACTCAATTTATTGCGTATGTAGCTTACCCATTAGACCTTTTTGAAGAAGGGTCTGTTACTAACATGTTTACCTCAATTGTGGGTAACGTATTTGGGTTCAAAGCCCTGGCTGCTCTACGTCTAGAGGATCTGCRAATCCCTCCGGCTTATACTAAAACTTTCCAGGGAYCACCTCATGGTATCCAAGTTGAAAGAGATRAATTGAACAAG…	647	2	ATCG00490.1		large subunit of RUBISCO.	Identical to Ribulose bisphosphate carboxylase large chain precursor (rbcL) [Arabidopsis Thaliana] (GB:O03042); similar to large subunit of riblose-1,5-bisphosphate carboxylase/oxygenase [Crucihimalaya wallichii] (GB:YP_001123470.1); similar to large sub	100	14	0	0	605	646	234	247	4e-108	34.7
All.Contig_1033	GATTACTAGGAATGTACCTTGTCTACGAAGAGCTGCTTCTGTGGCGGAGGATTATGAAGCTGCTGGAGGTGAAGTTTTGGTTGATGATGAAGATAATGATGGTTGGCTTGCTACTCATGGAAGACCTAAAGRTAAAGGTAGTGAAGATGAAGACTTGCCATCCATGGATGCCTTGGAMATAAACGAGAGAGGTACTACTACTCAACCTAGGTGTGRTGGAGGCGAGGAGGAGGATGAGGAGGAAGATATTCCAGATATGGGAGGATTTTGAYGAGATTGACAATGATCCTGCAACTCTTCAGTCGAATTTACTTGTGGCTCACRAACCAGATGACGATAATATCCTTMGSACCAGAACATATGATGTTAGCATCACGTATGACAAGTAYTACCAAACTC…	766	2	AT5G61500.1	autophagy 3 (APG3)		Identical to Autophagy-related protein 3 (ATG3) [Arabidopsis Thaliana] (GB:Q0WWQ1;GB:Q8L982;GB:Q8S930;GB:Q9FKG9); similar to autophagocytosis protein [Sisymbrium irio] (GB:AAR15430.1); contains InterPro domain Autophagocytosis associated protein, N-termi	92.31	156	8	1	261	716	158	313	5e-109	292
All.Contig_1034	GGGTTGCGTTCCATAAAAGCTTAGGGTTCCGGATTCAAGGGAGGTTAGTCGCCACCGTCCCCTTACGTTAGCTTCTCTCAATCATCGTCGAATTTCTACAGATTCAGCAATTATGGGTGAAGAGGAGGACGCTGTGTCGTTGGATCAGAATAGCTCTGGTGGTGGCGAAGATTCGTCGCTCCGTCGTAATCGCCACTCGTCGCCATTACCGCCGCAYCTATCTTCTAAAGTGCTTACATTGCCCACCGTGTTAACCCTTGGCCGTGTAGCTGCCGTTCCGATTCTCGTCGCGACCTTTTACGTCGATTGCTGGTGGGGGAGAACTGCCACAACGAGTATTTTCATTGCAGCAGCCATTACAGACTGGCTTGACGGATACATTGCAAGAAAGATGAGGTT…	620	2	AT3G55030.1	PGPS2 (phosphatidylglycerolphosphate synthase 2); CDP-alcohol phosphatidyltransferase/ CDP-diacylglycerol-glycerol-3-phosphate 3-phosphatidyltransferase	Encodes a phosphatidylglycerolphosphate synthase.	similar to PGP1/PGPS1/PGS1 (PHOSPHATIDYLGLYCEROLPHOSPHATE SYNTHASE 1), CDP-alcohol phosphatidyltransferase/ CDP-diacylglycerol-glycerol-3-phosphate 3-phosphatidyltransferase [Arabidopsis thaliana] (TAIR:AT2G39290.1); similar to unnamed protein product [Vi	86.23	167	22	1	122	619	3	169	1e-64	242
All.Contig_1035	GGATTATCGTCGAAGGATCGTTGTGGAGATTTGATAGCGAAGGAGAGAGATCGAAGCACTGATGACGGGAGGAGTGATCAAGCTCGTGAAGCCGAAGATCCAATCTGTGGATATCCAGGCCGCCGCAGGATGGGGTATCGCCGCCGCARCCGGCGCCATCTGGGTCGTCCAACCTTTTGATTGGATTAAGAAGACATTCATTGATAAACCAGCACCTGAAGACAAGTGAGTGATCAAGATTCAAGAGAAAATGAGATTTTTTTTCTTCCAGTTTTCAAGTTTGTTATTRCATCTTTGCGATGTAGCTGAATAAAATTTTGTTTCTTTTCTGGAAAACGTGTTGTTTCATGCCTTCAATGTAGACATYCTGTTTTCWMAAAWRWWATAACACAAAGAAGG…	459	2	AT2G40765.1	unknown protein			75.93	54	13	0	65	226	4	57	8e-09	56.2
All.Contig_1036	TCCTTTAAAAAAAAAAGAATTCATATTTGCTTTTCTAGAACTCAAATTATTCTCAAGAAACATGACTATTGCTTTAACCATCGGAGGAAACGGGTTCTCGGGTCTGCCCGGATCTTCGTTCTCCTCAGCTTCTTCATCGCTCCGATTGAAGAACAGCAGACGAAAGAACACGAAGATGCTGAACAGGAAAGGAGTCGTCTGTTCTTCGTCTTCTGTAATGGATCCGTACAAGACCCTCAGGATCCGACCAGATTCGTCTGGAATACGAGGTCAAGCAAGCTTTCAGGCAACTCGCCAAAAAGTATCACCCGGATGTTTGTAGAGGAAGCAACTGTGGAGTGCAGTTTCAGACAATCAACGAAGCTTACGATATTGTGTTGAAGCAAATAAAGAATCAGA…	715	2	AT1G80920.1	J8; heat shock protein binding / unfolded protein binding	J8 mRNA, nuclear gene encoding plastid protein, complete	Identical to Chaperone protein dnaJ 8, chloroplast precursor (ATJ8) [Arabidopsis Thaliana] (GB:Q9SAG8;GB:Q9ZSN1); similar to DNAJ heat shock N-terminal domain-containing protein [Arabidopsis thaliana] (TAIR:AT1G72070.1); similar to putative DnaJ protein	76.19	84	19	1	62	310	1	84	1e-08	57
All.Contig_1037	GGACGATCGAGCCAAAAGAGGAAATATTGTATCTAAGCTTGGGGATCGAAGCGAAGAGAGGAGAAGGAGAAGGAGAAGCAAGCGCACCTCTTTCGATCCAATCAAAGAAGAAGAAGAAGAAGATGAGCGACGTGTTCGAAGGGTACGAGAGGCAGTACTGCGAGCTATCAACTAATCTCACCCGAAAATCCAATTCAGCTTCCCTTCTCCCCCACGGAGATGATAAGGAAGGGAAGCTTGGTGAGATCAAATCTGGGATCGATGAAGCCGATGTCTTGATCCGAAAAATGGACCTTGAGGCTAGGAGTTTGCAGCCGAGTGCTAAGGCTACTTGTCTTGCTAAACTCAGAGARTAYAAGTCTGACCTCAACCAACTCAAGAAGGAGTTCAAAAGGGTTT…	917	2	AT1G26670.1	ATVTI12/VTI12/VTI1B (VESICAL TRANSPORT V-SNARE 12); SNARE binding / receptor/ soluble NSF attachment protein	member of VTI1 Gene Family. Normally localizes to the transgolgi network and plasma membrane. A dominant mutation (zip1) alters the subcellular localization of VTI12 and suppresses loss of function mutation (zag1) of VTI11. Interacts with members of the	Identical to Vesicle transport v-SNARE 12 (VTI12) [Arabidopsis Thaliana] (GB:Q9SEL5;GB:Q9LQY5); similar to ATVTI11/ATVTI1A/SGR4/VTI11/VTI1A/ZIG (VESICLE TRANSPORT V-SNARE 11), receptor [Arabidopsis thaliana] (TAIR:AT5G39510.1); similar to hypothetical pr	83.78	222	36	0	123	788	1	222	6e-86	314
All.Contig_1038	CAACAAGCACTGCCCAAGCTCAGTCTCCTTCAATACTGTCCCCATCATCATCTGCTGCTGCTGCTGCATCGTCCCTGAGAAACGTCTCGCATAAACAGCAAAGCCGTCCCCAGCAATCGCAAATATCTTTTGCGGCAAACTCGAAACCTATGGCTTCTGGTTCACCTATGCAGCAGATGCAAGGAGGTGCCAACAACCGAGCTCCGTCTCCACCAATGTTAGTTGGATCACCTTCTACATCTTCGGTCTCCAAAAACGCCGGGGGAAGCCCAAGGACAACTGCTTCCGCTTCCTCAGCAGTGAACAAAGCTGGACAAGCTTCCTCTACTACTCACTCATCATCTCAGCCGTCCAAGAACTTGCAGTCTGCATCTGTGGCGTCATCTACTGGTGGAAGGA…	868	2	AT3G22380.2	TIC (TIME FOR COFFEE)	Encodes a nucleus-acting plant-specific clock regulator working close to the central oscillator and affecting the circadian gating of light responses. Circadian gating is the alteration of circadian phase according to the photoperiod of the entraining da	similar to ATTKL/TKL (TICKLE) [Arabidopsis thaliana] (TAIR:AT3G63180.1); similar to unnamed protein product [Vitis vinifera] (GB:CAO71144.1)	80.81	172	31	2	78	587	1301	1472	3e-50	195
All.Contig_1039	GAAGACACATTTCCTTTTTTCTCACCGCCTCCTCGTTTATACCAAACACTGTTCTTTTATCTTCCTGTCCGAATCATAACCAAAAAACCAGACTGAATGGGAGCTGGTACAGTTGTGAGAGATCGAGTACGGAAAGATCTCTCTGAGATTTCCAACAAAACGACGAAACCCATCGTTTCTGCCTCTCCGGAGATTCGTTCAAACTCACGGAAGAAGATCCAACGGCGGAGCAAGAAAGCTGTGATCTCTCCGGTGCAGAAGCTCTTCGAAACTTGCAAGAAAGTATTCGCTAATGGCAAATCCGGAGCCGTCCCGTCCCAAGAACACATCAACATGCTTCGAGCCGTTCTGGACGAAATCAAGGCTGAAGATGTTGATGTGAGCCCTAAGATGCCGTGT…	1523	3	AT5G39890.1			similar to unknown protein [Arabidopsis thaliana] (TAIR:AT5G15120.1); similar to unnamed protein product [Vitis vinifera] (GB:CAO14912.1); contains InterPro domain Protein of unknown function DUF1637 (InterPro:IPR012864)	81.21	282	52	3	97	939	1	276	3e-128	455
All.Contig_104	GAGACAGCGTTTCATTATCACTTCCGACAAAACTCTTTATACCTTTCCGCACTTCCTTTCCACCGACTTCCTCCATGGCTCCGATTGCTGTTGGCGATGTTGTACCTGACGGATCTATCTCCTTCTTCGACGAGAACGATCAGCTCCAGACTGTCTCCGTTCACTCCCTCGCCGCCGGTAAGAAGGTCATCCTCTTCGGTGTCCCTGGTGCTTTCACCCCCACCTGCAGTATGCAGCATGTGCCTGGATTCATCGAGAAAGCAGAGGAGCTGAAGTCAAAGGGTGTTGACGAGATCATTTGCTTTAGTGTGAATGATCCGTTTGTGATGAAGGCATGGGGGAAGACGTACCCAGAGAACAAGCATGTGAAGTTTGTGGCAGACGGTTCAGGAGAATACA…	823	32	AT1G65980.1	TPX1 (THIOREDOXIN-DEPENDENT PEROXIDASE 1); antioxidant	thioredoxin-dependent peroxidase	Identical to Peroxiredoxin-2B (PRXIIB) [Arabidopsis Thaliana] (GB:Q9XEX2); similar to TPX2 (THIOREDOXIN-DEPENDENT PEROXIDASE 2), antioxidant [Arabidopsis thaliana] (TAIR:AT1G65970.1); similar to type 2 peroxiredoxin [Brassica rapa subsp. pekinensis] (GB:	96.3	162	6	0	75	560	1	162	2e-76	282
All.Contig_1040	CTTTACAACACACTACCAAAGAACGTACGATGAGCGTTGGAATCGTATGTTGCGTTTTCAACGTGATGATGTATGCTTCTCCATTGTCTGTTATGAAAATGGTAATAAGAACGAAAAGCGTGGAGTTCATGCCGTTTCGGCTGTCGTTAGCTGCGTTTCTAAACGCGGGTGTTTGGACTGTTTATGCACTCATGCCTTTGGATCCATTCATAGCTATTCCAAATGGAATTGGATGTATATTTGGGCTGGCCCAATTAATATTGTACGCTACATACTACAAATCCACCAAAAAAATGATGGCAGAGAGACAACCGATGATAGGTTTATCCAGTGTGGTCGTTCGTATTGGATCGGAGAAAGTTGCGCAACCATCGGCTTAGCGKCGTTTGATTTGATCTA…	566	2	AT4G10850.1	nodulin MtN3 family protein		similar to nodulin MtN3 family protein [Arabidopsis thaliana] (TAIR:AT1G66770.1); similar to unnamed protein product [Vitis vinifera] (GB:CAO69485.1); contains InterPro domain MtN3 and saliva related transmembrane protein (InterPro:IPR004316)	80.65	124	21	2	3	365	126	249	2e-52	201
All.Contig_1041	GACAACCACATGCAACAGCACATCAATGTCTGCTTCTTCTTCTTCTTCTTTATTTAATCTCTCTTTGATTCGCTTCAGATCTCTCTCTTCTCCCCGGTTTCTCCGTCTTCCTCCTTCACCGCTCCGTTTCGGTTCCATATCACCGAGGAAGTTTCGAGCTTTCTCCGGTACCGCAATGACGACAGATGCTAAAGATGCTGGGATGGATGCTGTCCAGAGACGCCTCATGTTCGAGGACGAATGCATTCTTGTTGACGAAACTGATCGTGTTGTGGGRCATGACAGCAARTATAATTGYCATCTGATGGAAAAYATYGARGCTAAGAATTTGCTTCACAGGGCTTTTAGTGTRTTTTTATTCAACTCCAACTATGAGTTGGCTYCTCCAGCAAAGGTCRA…	825	2	AT3G02780.1	IDI2/IPIAT1/IPP2 (ISOPENTENYL DIPHOSPHATE ISOMERASE 2, ISOPENTENYL PYROPHOSPHATE:DIMETHYLLALLYL PYROPHOSPHATE ISOMERASE 2); isopentenyl-diphosphate delta-isomerase	Encodes a protein with isopentenyl diphosphate:dimethylallyl diphosphate isomerase activity.	Identical to Isopentenyl-diphosphate Delta-isomerase II (IPP2) [Arabidopsis Thaliana] (GB:Q42553); similar to IPP1 (ISOPENTENYL DIPHOSPHATE ISOMERASE 1), isopentenyl-diphosphate delta-isomerase [Arabidopsis thaliana] (TAIR:AT5G16440.1); similar to isopen	93.92	148	9	0	381	824	119	266	4e-79	291
All.Contig_1042	GAGAACACACGTGCTGCATACCCTATTGAGCTCATCCCAAACGCGAAAATACCGTGCGTTGGTCCACACCCGAAAAACGTGATTCTTCTGGCATGTGACGCCTTTGGTGTTCTCCCGCCTGTGAGCAAGCTGAATCTTGCACAAACCATGTACCACTTCATCAGTGGTTACACTGCTCTGGTTGCKGGSACRGAGGACGGYATMAAGGAGCCAACAGCWACATTCTCAGCATGCTTTGGTGCAGCTTTCATAATGYTGCATCCWACAAAGTAYGCRGCTATGTTRGCCGAGAAGATGAAGASGCAAGGCGCTACTGGATGGCTCGTTAACACTGGTTGGTCCGGTGGCAGCTAYGGWGTTGGAAACAGGATCAAGCTGGCGTATACTAGGAAGATCATC…	1188	3	AT4G37870.1	PCK1/PEPCK (PHOSPHOENOLPYRUVATE CARBOXYKINASE 1); ATP binding / phosphoenolpyruvate carboxykinase (ATP)	Encodes a putative phosphoenolpyruvate carboxykinase (ATP-dependent).	Identical to Phosphoenolpyruvate carboxykinase [ATP] [Arabidopsis Thaliana] (GB:Q9T074); similar to PCK2/PEPCK (PHOSPHOENOLPYRUVATE CARBOXYKINASE 2), ATP binding / phosphoenolpyruvate carboxykinase (ATP) [Arabidopsis thaliana] (TAIR:AT5G65690.1); similar	95.45	220	10	0	1	660	452	671	1e-113	406
All.Contig_1043	GAACACAACTCAACTCACTCAAAACCCTAAAACAAACACAAACAAAACAATCAAAATGAAGAAACCTTCAGTGACCCCTTTTCTCATCACTCTCCTGTTGGCTGCAGCTGTCTGCACCCACGGCAAAGAAGAGGTGAAGGACTCCAACGGAAATCCAGTTAAAATCGGTGCAAAATACTTCATCCAGCCGGCTAAGAGCAACGGCGGTGGTCTTGTTCCAGCCGCCATTAGCGTACTTCCGTTTTGTCCACTTGGCATCACCCAAACACTTCTTCCGTACCAACCGGGCCTGCCGGTTAGCTTCGGATATTATCCACCTTTCGTCGGCACAGACTACATTGTCACATCTACCACTATAAACSTCAAGTTCGAGTCCGACMTCTGGCCTGTATGCAACGA…	745	2	AT1G72290.1	trypsin and protease inhibitor family protein / Kunitz family protein		similar to trypsin and protease inhibitor family protein / Kunitz family protein [Arabidopsis thaliana] (TAIR:AT1G73325.1); similar to water-soluble chlorophyll protein [Raphanus sativus var. niger] (GB:BAB72020.1); contains InterPro domain Kunitz inhibit	59.91	212	79	4	65	682	4	212	1e-59	226
All.Contig_1044	GGCCGSACACTTTAACCACAAGCAGCACAATCACCGGNGAAGAAGATGGCGTCGAGAGACCAAGTTAAGGCGTCGCACATTCWGATCAAGCACCAAGGATCTCGTAGGAAGGCGTCGTGGAAGGATCCCGAAGGAAAGATCATTATGACTACTACCAGAGAAGCAGCCGTCGAACAGCTTAGATCGATCCGCGAAGACATCCTCTCTGGCAAAGCTAACTTCGAGGATGTGGCCACTCGCGTTTCCGACTGTAGCTCCGCCAAACGCGGCGGCGATCTAGGTCCGTTTGGGCGAGGTCAAATGCAGAAACCGTTTGAGGAAGCAACATACGCACTCAGGGTTGGTGATATAAGTGATATCGTGGATACAGACAGTGGAGTCCATATCATTAAGAGAACA…	583	2	AT2G18040.1	PIN1AT (parvulin 1At)	phosphorylation-specific peptidyl prolyl cis/trans isomerase (PPIase) with specificity for phosphoserine-proline bonds	Identical to Peptidyl-prolyl cis-trans isomerase 1 (PIN1) [Arabidopsis Thaliana] (GB:Q9SL42;GB:Q42334); similar to peptidyl-prolyl cis-trans isomerase PPIC-type family protein [Arabidopsis thaliana] (TAIR:AT1G26550.1); similar to parvulin-type peptidyl-p	94.12	119	7	0	46	402	1	119	2e-59	225
All.Contig_1045	GAACGCAGAACAACTTTTGTGGAGGAGAGAAAGCGATATAACACACACGCAGAGATATACATCTTCAATAGTTAAGAGTTTTCTATATACAGAAGAAGTGTGTGTGATAGAGAGACATCAGATACAAAAGCATAAGAAATGCAACAGCACCTGATGCAGATGCAGCCCATGATGGCTGGTTACTACCCCAGCAATGTCACCTCTGATCATATTCAGCAGGTTTTCTTCTTCTGCTACTTCTATTTTATCATCTCTTTCTTTATTATTTATGTTTCTTTGAATTTTAAAAGAACGAGAGTGATGAAATCTCGCTTGCAAGAACCCTGAGAGGCCCTTTTTTTTTGCTCTCTTACAACATATTTAAGTGATTGTTTTCTCATGGGTGAAACCAAACACAGA…	1129	2	AT5G28640.1	AN3 (ANGUSITFOLIA3)	Encodes a protein with similarity to mammalian transcriptional coactivator that is involved in cell proliferation during leaf and flower development. Loss of function mutations have narrow, pointed leaves and narrow floral organs. AN3 interacts with membe	similar to GIF3 (GRF1-INTERACTING FACTOR 3) [Arabidopsis thaliana] (TAIR:AT4G00850.1); similar to unknown [Populus trichocarpa] (GB:ABK94681.1); contains InterPro domain SSXT (InterPro:IPR007726)	100	15	0	0	175	219	13	27	0.039	36.2
All.Contig_1046	GATCTTCCTCACCGGTGCCGCATCTCTATTCCACGGATTTGGTTTTTTGAAGATGGCATCGAAGTTGGTACAAGTTCAGTCAAAGGCGTGTGAGGCTTCAAAGTTTGTGGCTAAGCATGGGACTTCCTATTACAGGCAGTTGCTTGAGAAGAACAAGCATTACATCCAGGAGCCACTGTGGAGAAGTGCCAAGAGTTGTCTAAGCAGCTTCTCTACACCCGTCTTGCTAGCATTCCCAAACGCTATGAGACTTTCTGGAAGGAAGTAGACTACGCAAAGAACTTGTGGAAGAACAGAWSCGATCTGAAGGTAGAAGATGCAGGAATTGCTGCATTGTTTGGTCTCGAATGCTTTGCRTGGTACTGCGCAGGAGAAATCGCCGGAAGAGGATKCACCTTC…	592	3	AT4G29480.1	mitochondrial ATP synthase g subunit family protein		similar to mitochondrial ATP synthase g subunit family protein [Arabidopsis thaliana] (TAIR:AT2G19680.1); similar to mitochondrial ATP synthase g subunit family protein [Arabidopsis thaliana] (TAIR:AT2G19680.2); similar to unknown [Solanum tuberosum] (GB:	95.12	41	2	0	53	175	1	41	1e-59	82.4
All.Contig_1047	GCTACAGAAAACTATCAAAGCCCAGTGCTGTGTGTATCTTCTATCAGGAAAATGGCAGAAAATGCTGAGTTGTTGGAGTGGCCAAAGAAGGATAAGCGTCGTTTTCTCCATGTTGTGTACCGCGTTGGTGACCTTGATCGCACTATCCAGTTCTACACTGAGTGCTTTGGCATGAAGCTGTTGAGGAAAAGAGATGTCCCTGAGGAGAAGTACTCTAATGCTTTCCTTGGTTTTGGTCCTGAAACCTCCAACTTCGTTGTCGAGCTCACTTACAATTATGGTGTTAGCTCATATGACATTGGAACTGGATTTGGGCATTTCGCTATTTCAACTCAAGATGTTTCCAAGATGGTTGAAGCTGTCCGTGCCAAAGGTGGGAATGTCACCAGAGAGCCTGGT…	725	2	AT1G11840.5	ATGLX1 (GLYOXALASE I HOMOLOG); lactoylglutathione lyase	Encodes a glyoxalase I homolog ATGLX1.	similar to lactoylglutathione lyase, putative / glyoxalase I, putative [Arabidopsis thaliana] (TAIR:AT1G67280.1); similar to putative lactoylglutathione lyase [Brassica rapa] (GB:BAF81517.1); contains InterPro domain Glyoxalase/bleomycin resistance protei	85.19	162	24	0	52	537	1	162	4e-76	281
All.Contig_1048	GATGTGTTGGCTGGAAAGACGGAGGATGGGACTCATCATTATGGTGTGCTTGAAGGATAGTTTGGTCACCATTGGTGGAATGGAAGAGCTGCTATTCTTCTCATTACTACTCTTGGTGTGTTTGCTCCTTTGGCTTGCTTCAAGCGAATTGATTCTTTGAGATTTACATCTGCTCTATCAGTGGCTCTCGCGGTCGTGTTTCTCGTCATCACAGCGGGGATTTCGATCATGAAGTTGATCAGTGGTGGCGTGGCGATGCCGAGATTGCTACCGGATGTTAGTGACTTAACATCCTTCTGGAATCTCTTCACTGTTGTACCTGTTCTTGTCACCGCGTTCATTTGCCATTACAATGTTCACAGCATACAGAATGAGCTTGACGACCCAGCTCAGATAAGA…	1117	2	AT3G30390.2	amino acid transporter family protein		similar to amino acid transporter family protein [Arabidopsis thaliana] (TAIR:AT5G38820.1); similar to unnamed protein product [Vitis vinifera] (GB:CAO49239.1); contains InterPro domain Amino acid transporter, transmembrane (InterPro:IPR013057)	94.65	318	17	0	1	954	143	460	7e-155	543
All.Contig_1049	GAAGCGTGCTCTTCCTAAAGATGCTAATCCAGGTGGTGCTGGACGAGCCATGGGTGGTGGCGGTGGTGGGTATGGAAATGGTAGTAATGGTGCTGGATTTGGTGGATACGGAGGTTACGGTGCTGGTGCTGGAGCTGCATATGGAGCAACGGGGATGCCAGGTGGTGGTTATGGAAGTAGTGTTGCTCCGACAAACACATGGGACACTCCATCAGCTCCTAGTGGTTATGGGAACCCCGGAGGGTATGGGAATGGTGCTGCTCAAAGTGGGTATGGAGCTCCTCCGGCTCAGACACACTACGGATATGGAGGGTACAGTGGAAGTGGTGATGCTGGTTACGGTAACCAAACTGCATATGGTGCGGTTGGACGGAGACCTAGTGTTGGGGGGTTGAACAA…	565	2	AT4G14300.1	heterogeneous nuclear ribonucleoprotein, putative / hnRNP, putative		similar to heterogeneous nuclear ribonucleoprotein, putative / hnRNP, putative [Arabidopsis thaliana] (TAIR:AT2G33410.1); similar to unnamed protein product [Vitis vinifera] (GB:CAO71458.1); contains InterPro domain RNA recognition motif, RNP-1; (InterPro	41.77	79	36	3	176	382	292	368	0.75	30.4
All.Contig_105	GAGAAAATCGTGGAGGAGAAGTTACCATCGATATTGAACAACGATCCAACATCTTTAGCTGTACTTAATGCTGCAACGCATTTCAAATTGCACCAGAGAGCTGCACATGTTTACTCTGAAGCACGGAGAGTTCATGGTTTCAAGGACACTGTCTATTCAAACTTAAGTGACGAAGAGAAGTTGAAGAAGCCTGGTGATCTCATGAATGACAGCCATTACAGCTGCAGTGTGCTATRSGRGTCGCAGTGACCAKGCCCGGAGCTAGAAGAACTAGTTAAAGTGAGCAGGGAGAATGGAGCACTTGGAGCAAGACTGACCGGAGCTGGATGGGGTGGTTGCACTGTGGCTTTGGTTAAAGAATCTGGCGTCTCTCAGTTCATCKCTGCGGTTAAGGAGAAG…	742	2	AT3G06580.1	GAL1 (GALACTOSE KINASE 1); ATP binding / galactokinase	Encodes a protein with galactose kinase activity. The gene was shown to complement the yeast &Delta;gal1 mutant defective in the galactokinase gene GAL1.	Identical to Galactokinase (GAL1) [Arabidopsis Thaliana] (GB:Q9SEE5;GB:O24021;GB:O48936); similar to ARA1 (ARABINOSE KINASE), ATP binding / galactokinase [Arabidopsis thaliana] (TAIR:AT4G16130.1); similar to hypothetical protein OsJ_012668 [Oryza sativa	84.94	166	25	1	1	498	332	495	8e-64	240
All.Contig_1050	GAATTACACGCAATTCAATTTCAATTTCAATTTTTATTCCTTCTTCTTCTGCTACCGAATCCTACGCCTCACCATGTGCACGTTAGAGAAGCGCGGCAACCTCTTCCTCCTAACCCTAACCGGCGACAACGAGCACAGATTCAACCCCGACGCAATCGCCACCATCCTCTCCCTTCTCGGCCAAGCCAAATCTCAAGCCAAGCGTGGATCCGTACTCATCACCACCGGCCACGGAAAGTTCTTCTCCAACGGATTCGATCTCGCATGGGCCCAAGCCTCCGGATCCTTAACCGGAGCCGCCGAACGGCTTCACCAGATGGTCGAATCGTTCAAACCCGTGGTCGCGGCGCTCCTCGACCTCCCTATGCCCACGATCGCCGCCTTGAACGGCCACGCCGC…	550	1	AT4G14430.1	enoyl-CoA hydratase/isomerase family protein		similar to enoyl-CoA hydratase/isomerase family protein [Arabidopsis thaliana] (TAIR:AT4G14440.1); similar to hypothetical protein [Vitis vinifera] (GB:CAN82902.1); contains InterPro domain Crotonase, core; (InterPro:IPR001753)	88.05	159	19	0	74	550	1	159	2e-66	248
All.Contig_1051	GKCATCATCTGAACCTTAAACACTCAATCATCTAAATCTCGAGAAAGTTCTAATGTCAGGAAGAGGAAAAGGAGGCAAGGGGTTGGGCAAAGGAGGAGCCAAGAGGCACAGGAAGGTTCTGAGAGACAACATCCAAGGAATCACCAAGCCTGCGATCAGGCGTCTCGCTCGTAGAGGAGGCGTGAAGAGAATCAGCGGGTTGATCTACGAAGAGACCAGAGGAGTTCTGAAGATCTTTCTCGAGAATGTGATTAGAGACGCCGTGACGTACACGGAGCACGCGAGGAGGAAGACGGTTACGGCGATGGATGTTGTTTATGCTTTGAAGAGGCAAGGGCGTACTCTTTATGGATTCGGTGGTTAAAACCGGTTTAAGATTTCGGTTTGGTTTATGGGTGC…	536	3	AT5G59970.1	histone H4		Identical to Histone H4 [Arabidopsis Thaliana] (GB:P59259;GB:P02308); similar to histone H4 [Arabidopsis thaliana] (TAIR:AT5G59690.1); similar to histone H4 [Arabidopsis thaliana] (TAIR:AT3G45930.1); similar to histone H4 [Arabidopsis thaliana] (TAIR:AT3G	100	82	0	0	116	361	22	103	1e-40	162
All.Contig_1052	GATTTTCTCATAAAAAACAATCTTCTCTTTAAAACGATGGAGTGTAGACCGTTGGATCTGACGATCATATCCGCAGAGGACCTCAAAGACATCCAGCTGATCGGCAAGCAAGACTTGTACGCCGTCGTTTCCCTCAACAACGACGCAAGGACCAAGCAAAAGACGAAGGTGGACAAAGACTGCGGGACGAAACCTAAATGGAATCATCAGATCAAGCTCACCGTCGACGACACAGCAGCGCGTGAGAACCATCTCACACTTGTCATCCAGATCATCGCTGATCGTCCCATCGCCGGTGATAAACCAGTCGGAGAGGTTAGCGTTCCCTTGAAGGAGCTTTTGGATCAGAACAACAAGGAGGGTGACGTGGAGRAGGAGRAAACGGTGACGTATGCTGTG…	1185	3	AT1G09070.1	(AT)SRC2/SRC2 (SOYBEAN GENE REGULATED BY COLD-2); protein binding	SRC2 specifically binds the peptide PIEPPPHH, and moves from ER to a vacuole fraction where it gets internalized. Involved in Protein Storage Vacuole targeting.	similar to C2 domain-containing protein [Arabidopsis thaliana] (TAIR:AT3G16510.1); similar to unnamed protein product [Vitis vinifera] (GB:CAO70977.1); contains InterPro domain XYPPX repeat (InterPro:IPR006031); contains InterPro domain C2 calcium-depende	81.71	164	30	2	37	528	1	160	2e-65	246
All.Contig_1053	GGAAGCAGATCGGAATTTTCGAGAAAGCGCGAGAGGGAGAGAGACGAAACGATGTCGTGTCTTCTACCGCATCTTCACTCCGGCTGGGCTGTAGATCAGGCGATTCTAGCCGAGGAAGAGCGTCTCGTCGTCATACGTTTCGGCCATGATTGGGATGAGACTTGTATGCAGATGGATGAGGTGCTAGCATCTGTTGCTGAGACGATAAAGAACTTTGCGGTGATATATCTGGTGGACATCACCGAGGTTCCAGACTTCAACACCATGCACGAGCTCTACAATCCTTCGACTGTGATGTTCTTCTTTAGGAACAAGCACATTATGATCGATCTTGGGACTGGAAACAACAACAAGATCAATTGGGCTATGAAGGACAAGCAGGAGTTTATTGATATCATT…	703	2	AT5G08290.1	YLS8 (yellow-leaf-specific gene 8); catalytic	Encodes Dim1 homolog.	similar to catalytic [Arabidopsis thaliana] (TAIR:AT3G24730.1); similar to unknown [Populus trichocarpa] (GB:ABK94150.1); contains InterPro domain Thioredoxin-like fold (InterPro:IPR012336); contains InterPro domain Thioredoxin fold (InterPro:IPR012335);	95.77	142	6	0	52	477	1	142	7e-77	283
All.Contig_1054	CTCATAACAGCACCAAACAGCGACATTGCATATCTTCAAGACAGACCAGTGCGACTTGCCCGTGGGCTCCTACAAGAACCAAGCGATGGGTCTCCTATGTTGAAGCGGTCTTGAGCTCTCTAAAGCATCCATCCACCACCCCCATGGAAATATCACTGTGGAAGCAGAATCGAGTATTTGTCTGAAAATTTCCATCTTCTGAGTATATTCTTTGGGTCTAGAAATGTATAAAAGATCTGAATTTAAGTGAGAACCCATGGTAGTAGTGAGTTTAGACATTATGATGTGAACTTGTTTGACAATATTTGTGTTCCATTTTCTCCTGAAGACAACTCTTTATGTTCTCTGAGTTCACACTTCTGATTTGTATGTCATACATTATGAAATCTGCGATGCTGT…	466	3	AT5G47310.1			similar to unknown protein [Arabidopsis thaliana] (TAIR:AT4G17486.1); similar to hypothetical protein 25.t00041 [Brassica oleracea] (GB:ABD64953.1); contains InterPro domain Protein of unknown function DUF862, eukaryotic (InterPro:IPR008580)	77.5	40	6	1	1	111	206	245	2e-09	58.2
All.Contig_1055	GACACACACACCATCTGCTAACAATTCTCATTGAATCTTATTACTAGTAAGTACGATAAAATTAATGGGTTCAAGGTTTATCGACACCATTCCATCCTTAAGCTATGATGATGATAAGAGTGATGATGAATGTGCGTTTGTGAGAGCGCTACGTATGAGTGGTGGAGACGGAGCCAACAGTTACTCTGCCAATTCCCTTCTTCAGAGAAGAGTTTTATCAATGGCTAAACCAGTATTGGTAAAAAACACAGAAGACATGATGATGAACTTAGACTTTCCAAGCTACATCAAAGTTGCCGAACTGGGTTGTTCGTCCGGACAGAACTCATTTGTGGCTATATCTGAGATCATCAACACAATCAATGTGTTGTGCCAACAACTGAACCAAAACCCACCAGA…	748	2	AT3G11480.1	BSMT1; S-adenosylmethionine-dependent methyltransferase	The gene encodes a SABATH methyltransferase that methylates both salicylic acid and benzoic acid. It is highly expressed in flowers, induced by biotic and abiotic stress and thought to be involved in direct defense mechanism.	similar to NAMT1, S-adenosylmethionine-dependent methyltransferase [Arabidopsis thaliana] (TAIR:AT5G04370.1); similar to methyl transferase [Arabidopsis lyrata subsp. lyrata] (GB:AAP57211.1); contains InterPro domain SAM dependent carboxyl methyltransfera	84.46	148	23	0	65	508	1	148	4e-72	255
All.Contig_1056	TACAGAAAGGGTGTTAAGGAAATTAACAAACAAGGGAAAGAGGTTTTGTATGATTTTGAAGACAAGATAAATCAAGCTGTCTTCCCTGGTCTTCAAGGTGGTCCACATAACCACACTATTACAGGACTAGCTGTTGCTTTAAAACAGGCAACTACTTCAGAGTACAAAGCATACCAAGAGCAAGTCCTGAGTAACTCTGCAAAGTTTGCTCAGACTCTGATGGAGAAAGGGTATGAACTTGTTTCTGGTGGAATTGACAACCATCTGGTTCTAGTGAACCTGAAGCCCAAGGGAATTGATGGATCTAGAGTTGAGAAAGTGTTGGAAGCTGTTCACATTGCATCAAACAAAAACACTGTTCCTGGAGATGTTTCTGCCATGGTTCCTGGTGGAATCCGA…	738	2	AT4G37930.1	SHM1 (SERINE HYDROXYMETHYLTRANSFERASE 1); glycine hydroxymethyltransferase/ poly(U) binding	Encodes a protein with mitochondrial serine hydroxymethyltransferase activity, which functions in the photorespiratory pathway, catalyzes the conversion of serine and tetrahydrofolate to glycine and 5,10-methylene tetrahydrofolate. Involved in controllin	Identical to Serine hydroxymethyltransferase, mitochondrial precursor (SHM1) [Arabidopsis Thaliana] (GB:Q9SZJ5;GB:Q940M9); similar to SHM2 (SERINE HYDROXYMETHYLTRANSFERASE 2), glycine hydroxymethyltransferase [Arabidopsis thaliana] (TAIR:AT5G26780.2); si	97.73	220	5	0	1	660	298	517	2e-119	425
All.Contig_1057	GACGCCGTTACCATATTTCGACCGGGTTGCTTACACGGTCCAATTAGAAGGAATCCGGGTCGGATCGAAGTTGCTTTCTCTACCGAAATCCGTTTTCGTACCGGACCATACCGGAGCCGGTCAGACGATTGTGGATTCAGGTACACAGTTCACGTTCCTGATGGGTCCGGTTTATACCGCTTTGAAAACCGAGTTTATTGCGCAGACCAAATCGGTTCTCAAAGTTGTAGACGATCCGAATTTTGTGTTCCAAGGGACAATGGACCTTTGTTACCGGGTTGGGTCGTTAACCCGGCCCAATTTCTCTGGTTTGCCCGTTGTTAGTTTAATGTTTCGTGGCGCGGAGATGAGCGTGGCGGGTGAGAAGCTGTTGTACCGGGTAAACGGAGCCGGTTCGGG…	654	3	AT2G39710.1	aspartyl protease family protein	Encodes a Cysteine-rich peptide (CRP) family protein	similar to ATASP38/PCS1 (PROMOTION OF CELL SURVIVAL1), aspartic-type endopeptidase/ peptidase [Arabidopsis thaliana] (TAIR:AT5G02190.1); similar to hypothetical protein [Vitis vinifera] (GB:CAN70318.1); contains InterPro domain Peptidase aspartic, catalyt	90.21	194	19	0	2	583	249	442	5e-101	363
All.Contig_1058	AATCGAGAGGAATCGCGGATATAGTTTAAAAATGTCAAATAACTTTGAAGACCGAAGTTATCCTATAGATGCTGTATTCATGCCTGTTCAAAATGCGAATCATAGTATTCATTCTTATGGGAATGGGAATGAAAAACAAGAGATTCTTTTTCTAGAAATATGGACAAATGGAAGTTTAACTCCTAAAGAAGCACTTCATGAAGCCTCCCGGAATTTGATTAATTTATTTATTCCTTTTCTACATGTAGAAGAAGAAACGTTCTATTTAGAGAACAATCAACATCAAGTTACTTTACCCCTTTTTCCYTTTCATAATAGATTAGTTAACCTAAGAAAAAAAAAAAAAGAACTAGCGTTTCAATATATTTTTATTGACCAATTAGAATTGCCTCCCAGAAT…	533	2	ATCG00740.1		RNA polymerase alpha subunit	Identical to DNA-directed RNA polymerase subunit alpha (rpoA) [Arabidopsis Thaliana] (GB:P56762); similar to RNA polymerase alpha subunit [Olimarabidopsis pumila] (GB:YP_001123147.1); similar to RNA polymerase alpha subunit [Nasturtium officinale] (GB:YP	96.09	179	5	1	2	532	151	329	8e-98	352
All.Contig_1059	GGAGAAATGGTGATCAACATGGAGTGGGGAAACTTCAGGTCATCACATCTTCCCTTGACCGAGTACGACCACCTGCTGGATTTCGATAGTTTGAATCCTGGTGAACAGATTCTTGAGAAAATCATTTCCGGTATGTATTTGGGAGAGATCTTGCGTAGAGTTCTTCTGAAGATGGCTGAAGAGGCTGCTTTCTTTGGCGACTCCATCCCACCTAAGCTGAAAGTACCATTCATCATAAGGACTCCTACCATGTCTGCTATGCACAGCGACACTTCTCCGGATTTGAAGGTTGTTGGAAGCAAGTTAAAGGACATACTGGAGGTCCCTACTACTCTGAAGATGAGAAAAGTTGTGATCAGTCTCTGTAACATCATTGCCACCCGAGGAGCTCGTCTCTCT…	836	2	AT4G29130.1	ATHXK1 (GLUCOSE INSENSITIVE 2); ATP binding / hexokinase	Encodes a hexokinase (HXK1) in the plant glucose-signaling network. Functions as a glucose sensor to interrelate nutrient, light, and hormone signaling networks for controlling growth and development in response to the changing environment.	Identical to Hexokinase-1 (HXK1) [Arabidopsis Thaliana] (GB:Q42525;GB:Q42535); similar to ATHXK2 (HEXOKINASE 2), ATP binding / hexokinase [Arabidopsis thaliana] (TAIR:AT2G19860.1); similar to hexokinase [Brassica oleracea] (GB:AAL60583.1); similar to hex	89.59	221	22	2	1	660	277	496	4e-105	377
All.Contig_106	GATCCATCTTCATCTTGCTTTCTTTCCTTAAATCATCTAAATCTTCACGTTACTTCYTTATCTGCATTTCAACTTAACCATGGCTTCGATTGTCTGCAGTTCCGCTCCTTTCACGATCCGAGCATCTTCCGGATCCGGRTCYATGAAAAACCCGGATYCAAACCGCAAGAAAMCTGTTTCTTGGTGGGCTCCTCTCTTCGGCATACCCWCCGAGCCGGATTACCTCAACATCGAAACCTCCTCCTCCRTGGCTCCGGAATCGAACGGGTCGGGTCAGGATCCGRGTCAAAAGCTTCGTCGTCGCGGGTGTCTCACGGAGGAGAAAGCTAAGGAGTTGAGGAAGAAAATMGCAGAAGCTTCCACGTTCCACGAAGTTATGTATCATTCAGCGATTGCGTC…	567	2	AT1G52720.1			similar to unknown protein [Arabidopsis thaliana] (TAIR:AT3G15630.1); similar to unnamed protein product [Vitis vinifera] (GB:CAO46032.1)	67.24	116	38	2	80	427	1	114	4e-36	147
All.Contig_1060	GGTAAAACAAACTTGCCACTTTAAAAAGTTTATTTGACCCAGCCCTCTAGGAGGCCAKGTATATAAATATGTGGTGACAAAAACTTGATACTTTCAAAATCTTCATTCAACCTTTCTCTATTTCCTGAAAAGACATGGAAGCTTCACATAATTCCAATCTCCAAATCCATAAACTCACAAAACAATTACATCATCTCCTAGAAGTAGAACAAGATGAAGAAGAAGAAGATAAAGAAGAAACACTCTCACTCCGTGACCTTCCCCTGCTCAACGACAACAAACCTAGTTCCACCGCCACCACAACCACCACTGAAGACCACGGTGAACCGTCGACGGAACCTTTTGAGTTCTTGACCTCAACTTCCTACGACGTTTCTCCGGCAGAAAACATTATCTACC…	617	3	AT4G30230.1	unknown protein			60.48	167	60	4	135	617	1	155	4e-41	164
All.Contig_1061	GGAGGATGGCGTTGAACGTGATACAATCATCTGTGCGTGTATCTTCAGCCACTTCTTTGACCTTCTCTTCCACCATCAAATCCTTCGTCACACCTTCCCTCTCTCTCGCAACCCATCGACTCTCTCTTCCTCCCCCGAATCTCAACCTCCTTCGCGTCCCCTCCTCTCCACCATCTCTCCGTCGAGGTTTTCGCGGTGGTCGTATCGCAGCAATGGCTTCTTCTGCTCCCGGATCGGTTAACAAACCAGAGGAAGAGTGGCGTGCGATTCTCTCTCCCGAGCAGTTCAGAATCCTCAGGCAGAAAGGCACTGAATATCCAGGGACAGGAGAATACAACAAAGTATTCACAGACGGGATCTATAGCTGTGCAGGATGTGGAACTCCTCTGTACAAATCCG…	1070	2	AT4G21860.1	MSRB2 (METHIONINE SULFOXIDE REDUCTASE B 2); peptide-methionine-(S)-S-oxide reductase		similar to methionine sulfoxide reductase domain-containing protein / SeIR domain-containing protein [Arabidopsis thaliana] (TAIR:AT4G04800.1); similar to chloroplast methionine sulfoxide reductase B2 precursor [Nicotiana tabacum] (GB:ABU49226.1); contain	70.81	185	53	3	6	557	1	179	3e-70	244
All.Contig_1062	GGATAAAAAAAAAGGSGAGGATGGCGTTGAACGTGATACAATCATCYGTGCGTGTATCTTCAGCCACTTCTTTGACCTTCTCTTCCACCATCAAATCCTTCGTYACACCTTCCCTCTSYCTCGCAACCCATCGACTCTCTCTTTCTCCCCCGGCGAATCTCAACCTCCTTCGCRTCCCCTCCTCTCCACCATCTCTCCGTCGAGGTTTTCGCRGTGGTCGTATCGCAGCAATGGCTTCTTCTGCTCCCGGATCGGTTAACAARCCAGAGGAAGAGTGGCGTGCGATTCTCTCTCCCGAGCAGTTCAGAATCCTCAGGCAGAAAGGCACTGAATATCCAGGGACAGGAGAATACAACAAAGTATTCACAGACGGGATCTATAGCTGTGCAGGATGTGRAA…	802	2	AT4G21860.1	MSRB2 (METHIONINE SULFOXIDE REDUCTASE B 2); peptide-methionine-(S)-S-oxide reductase		similar to methionine sulfoxide reductase domain-containing protein / SeIR domain-containing protein [Arabidopsis thaliana] (TAIR:AT4G04800.1); similar to chloroplast methionine sulfoxide reductase B2 precursor [Nicotiana tabacum] (GB:ABU49226.1); contain	72.73	209	56	3	21	644	1	202	1e-79	293
All.Contig_1063	GGATSGTGAGAGGTCCTGACGATAGTTTGAAGAGCACCACTAGAGACTGTAACAAGAAGGTCTTTTACGCTGTCCTGGTGTTTCGGATTCGTCAAACCTTCAAAAATCTGATCATAAGTGTTGATATCCATCGTCTTGTCGAGATACACAGACGCTGCTGTGCTGGYGAATCTCTCAATGCAATCAGCTAAAAGCTCTCTACACTTATCATCACACAGCAATCTCACCCATGGAGGTGTCTCCTCAGAATCATTCTTGACCTCATTTGAGCGAAACCCAAGAACAAGATTCTTAGCAAAGCTACCAACCACAACAGAAACGAACCTACCTCCTTCCTCTGAGAAAGCCTTATCAATCACTCTATCAACAACACTTGGCTCTGAACCAATCCCTGTAGAC…	742	2	AT5G12350.1	Ran GTPase binding / chromatin binding / zinc ion binding		similar to Ran GTPase binding / chromatin binding / zinc ion binding [Arabidopsis thaliana] (TAIR:AT5G19420.1); similar to PRAF1, Ran GTPase binding / chromatin binding / zinc ion binding [Arabidopsis thaliana] (TAIR:AT1G76950.1); similar to zinc finger p	34.33	67	38	2	229	411	687	751	2	29.6
All.Contig_1064	GAATKGATTTTTGTGTGTTGTCTTCTGCAAATCGAACGAGTGAAGAGCGAAAGAGAATCGAGAGAGAGAGAGAAGTATGGGTCCTCATGGAGATGGTGACATCGAGAATGTTGAATCGGAGAGTCGTCGTCGACCCATCTCCACAGTCGTCTTCGTCATCGCGATGCAAGCGGAGGCTCAACCTTTGGTCAACAAGTTCGGACTCTCCGAAACTTCTGATTCTCCGCTTGGTAAAGGATTGCCCTGGGTTCTCTACCACGGGCTGCACAAAGATCTTCGAATCTATGTAGTCTGCCCTGGAAAAGATGCTGCTTCAGGGATAGATAGTGTTGGAACTGTTCCAGCTTCTCTCATTACCTTTGCTTCTATCCAAGCTTTACAGCCTGACATTCTCATCAA…	675	3	AT4G38800.1	ATMTN1; catalytic/ methylthioadenosine nucleosidase		similar to ATMTN2, methylthioadenosine nucleosidase [Arabidopsis thaliana] (TAIR:AT4G34840.1); similar to unknown [Populus trichocarpa] (GB:ABK92454.1); contains InterPro domain Nucleoside phosphorylase; (InterPro:IPR000845)	88.24	204	19	2	77	673	1	204	2e-97	351
All.Contig_1065	GATAACCCACAACAACAACAACCAAAAATGATGTCCGAGAAGTTCCCTGATGTATTCACTTGGATACAAAACATTCCCCAAATCACCAAATGGAACACAACTTCTCTTTCCTTTTGTATTTGTCACTCAGCTTCTGATTTCCCAAATTCAACCTTCAATCTCATAGCACAAAGAAACCCAAAATCCAAGTGCCCCACCAAATGCCTTAATCATCTTCCACTACAAAAAAAAAAAACAAGTTAGTCCCTTTTAGCCAAAACCCTCGCTAAAAGCCAATTCCCAGTATACATATAAAGTAACATAAACACACTTGATTATTTSATACCTCTTTGTATTTATATATGCAAGATTTTCATATCAAGAAATAATAAGATCTAAACAYAGAAAACAGAAAGAAAA…	922	2	AT4G38620.1	MYB4 (myb domain protein 4); transcription factor	Encodes a R2R3 MYB protein which is involved in the response to UV-B. It functions as a repressor of target gene expression. One of its target genes encodes cinnamate 4-hydroxylase; mutants accumulate sinapate esters in their leaves.	Identical to Transcription repressor MYB4 (MYB4) [Arabidopsis Thaliana] (GB:Q9SZP1;GB:O49774;GB:Q7DLI1); similar to AtMYB32 (myb domain protein 32), DNA binding / transcription factor [Arabidopsis thaliana] (TAIR:AT4G34990.1); similar to transcription fa	92.77	166	12	3	403	900	1	163	4e-87	318
All.Contig_1066	GTAAGAGAAGAGTCTATGGAGAAAGCAGCTCTAGCTCCTCAGTTAGAGGCAAAAAGATAGTATCAGAACTACCTTCTGAAGAGAGACGTCTTGTCTTTAACCCGAGAGGAGGTTCTGTTTCAGATGGTAGACGGGCTAGGCATTGCATTCTGAATGATGCTTCGGGTGGGAGTCAGAGATCAGTAAATAGAGGTGACAGCCGCATTAGATTCACTAACCAAGGGAGTGGTAGTAGAAATGGTTTATCCTCTATTACAACAAGAGAGATGTCTCAGAGTGAGACATCAAACAATCTCAATTCTCCTGTCTCTTTGGAGCTCTTSTCTGGTTTCCCAGACTTTGGTTCTTTATCTAGTCAAGACAGTTTTCGCAATTACAATTTAGATGGGATCTCTGAGA…	999	2	AT4G31450.1	zinc finger (C3HC4-type RING finger) family protein		similar to zinc finger (C3HC4-type RING finger) family protein [Arabidopsis thaliana] (TAIR:AT5G24870.2); similar to zinc finger (C3HC4-type RING finger) family protein [Arabidopsis thaliana] (TAIR:AT5G24870.1); similar to unnamed protein product [Vitis v	77.78	288	48	6	3	818	213	494	5e-114	407
All.Contig_1067	GGGGGGGCAAGTGTTCTTCGGAATGACTAGGCGTAAAGGGCACGTAGGCGGTTCATCGGGTTGAAAGTGAAAGTCGTCAAAAAGTGGCGGAATGCTTTCGAAACCACTGAACTTGAGTGAGACAGAGGAGAGTGGAATTTCGTGTGGAGGGGTGAAATCTACGGATCTACGAAGGAACGCCAAAAGCGAAGGCAGCTCTCTGGGTCTCTACCGACGCTGGTGTGCGAAAGCATGGGGAGCGAACGGGATTAGATACCCTGGTAGTCCATGCCGTAAACGATGAGTGTTCGCCCTTGGTCTATTCTGATCTGGGGCTCAGCTAACGCGTTAAACACTCCTGCTGTTGTCACCGGCAAGCCCATTGATCTTGGTGGTTCGCTTGGTAGGGAAGCTGCCACA…	1105	2	AT5G07440.2	GDH2 (GLUTAMATE DEHYDROGENASE 2)	Encodes the alpha-subunit of the glutamate dehydrogenase. The enzyme is almost exclusively found in the mitochondria of stem and leaf companion cells.	Identical to Glutamate dehydrogenase 2 (GDH2) [Arabidopsis Thaliana] (GB:Q38946); similar to glutamate dehydrogenase, putative [Arabidopsis thaliana] (TAIR:AT3G03910.1); similar to GDH1 (GLUTAMATE DEHYDROGENASE 1), oxidoreductase [Arabidopsis thaliana] (	95.97	149	6	0	629	1075	262	410	7e-131	300
All.Contig_1068	GATCTCATCGCCGTTTGTTCTTTCGTCCTCCTTCTCTCTCTCTCTCTCTTGAAGTTGGGGTGATCGTCTTCTTTGGGTAAATTGAGTCTCAATAGCATCATTCAGACATGCAGCAATCACGAGCGAGACTGTTCAAGGAATACAARGAGGTTCAGCGAGAGAAAGTAGCTGATCCTGATATCCAATTGGTGTGTGATGATACCAACATTTTCAAATGGACTGCACTTATCAAGGGACCGTCGGAGACTCCTTATGAAGGCGGAGTGTTTCAGCTTGCATTYGCTGTTCCCGAACCGTATCCTCTGCAGCCTCCTCAAGTGCGSTTCTTGACCAARATATTCCATCCCAATGTGCATTTCAAGACTGGAGAAATATGTCTYGACATATTGAAGAACGCGT…	803	2	AT5G25760.2	PEX4 (PEROXIN4); ubiquitin-protein ligase	mutant displays sucrose-dependent seedling development and reduced lateral root production. PEX4 interacts with PEX22 in a yeast two-hybrid. Necessary for peroxisome biogenesis. The PEX4 and PEX22 pair may be important during the remodeling of peroxisome	similar to UBC9 (UBIQUITIN CONJUGATING ENZYME 9), ubiquitin-protein ligase [Arabidopsis thaliana] (TAIR:AT4G27960.2); similar to UBC10 (UBIQUITIN-CONJUGATING ENZYME 10), ubiquitin-protein ligase [Arabidopsis thaliana] (TAIR:AT5G53300.2); similar to UBC10	96.82	157	5	0	108	578	1	157	6e-88	320
All.Contig_1069	NGGGAGAGTATCAAATAATCAAACCACAGCGAGAGAGAGAAAACAAAAGAGAACCCCAAAGAAGCTAATATTTACAGTTTCGCCGCAAAGTTTGTGTTTCTGAACATTTAACCCCCCCCTCGAATCTGAGCTATTCGCCATGTGTGGAGGAGCTATAATCTCCGATTTCATCCCTCCGCCGAGTTCCCGCCGCGTCACGAGCGAGTTTCTCTGGCCGGATCTGAAGAAGAACAAGGGGAAAGCTTCGAAGAAGCGATCCGATTTCTTCGATCTGGACGATGAGTTCGAGGCTGACTTTCAAGGGTTTGAGGATGACGACGCGTCTTTTGACTGCGAAGACGATGATGAAGATGATGATGTCTTCGCTAAAGTGAAGCCCTTTGTCTTCACCGCGACCAC…	1165	3	AT3G14230.3	RAP2.2; DNA binding / transcription factor	encodes a member of the ERF (ethylene response factor) subfamily B-2 of ERF/AP2 transcription factor family (RAP2.2). The protein contains one AP2 domain. There are 5 members in this subfamily including RAP2.2 AND RAP2.12.	Identical to Ethylene-responsive transcription factor RELATED TO APETALA2 2 (RAP2-2) [Arabidopsis Thaliana] (GB:Q9LUM4;GB:O23104;GB:Q8LE76); similar to RAP2.12, DNA binding / transcription factor [Arabidopsis thaliana] (TAIR:AT1G53910.1); similar to RAP2	70.1	194	57	2	140	718	1	193	2e-109	197
All.Contig_107	GGGCTSTKCGMAAACTTYGAAAATGGGTGCKTACAAGTRTGTRTCTGAGCTATGGAGGAAGAAGCAGTCCGAYGTCATGAGGTTCGTGCAGAGGGTKAGGTRCTGGGAGTACAGACAGCARCCTTCSATYGTCCGTCYCGTCRGGCCTACTCGTCCCGACAAGGCTCGTCGTTTGGGTTACAARGCCAAACAGGGSTTTGGTRGTGTACCGTGTCCGWGTGAGACGTGGTGGACGCAAGAGGCCAGTGCCAAAGGGWATTGTSTAYGGTAAGCCCACAAACCAGGGAGTMACCCAACTCCAMGTTCCAGAGGAGCAAGCGTTCYGTTGCTGAGGAGCGTGCTGGAAGGAAAYTGGGYGGCCTCAGAGTCGTCAACTCYTACTGGCTCAACGAGGATTCR…	751	3	AT4G16720.1	60S ribosomal protein L15 (RPL15A)		Identical to 60S ribosomal protein L15-1 (RPL15A) [Arabidopsis Thaliana] (GB:O23515); similar to 60S ribosomal protein L15 (RPL15B) [Arabidopsis thaliana] (TAIR:AT4G17390.1); similar to 60S ribosomal protein L15 [Brassica oleracea] (GB:ABD65137.1); contai	91.53	59	5	0	23	199	1	59	2e-88	114
All.Contig_1070	GTGCGGAACTTTGCATCTGACATTCGTTGGGCTTCCCTCTTCGGGAGCCTGCGTCCCGGCGTTTTTGTGCAATAAACCCCTCCGGCCGAAGACTAGTGGTAGGTGGTCCCGCGTAGCTTTCGGAGAAGGGTAGCCTTGTGTGTAAGCACAGCAATGAACCGCGGCGAACCCTCAGACGACCTATCTAAGATTAGGGGGGGAGATCCTCAGTAGTGGTGACCCTTTCACTCTTCCCACGGACTGATRCATGTACCGAATGCTCATACGGGAAAGTTGACTCCTGGGTCTGGAACCTAGGGGGTTGCTCCGAGAAATCCTTTCTTTCTCGTCCACTCAGGGGGGTGCGGACACACCTGCGCGGATTACAGGTGACGGTTACAAGAATGGCGGGGAAGTGAA…	626	2	AT3G12250.5	TGA6 (TGA1a-related gene 6)	basic leucine zipper transcription factor involved in the activation of SA-responsive genes.	Identical to Transcription factor TGA6 (TGA6) [Arabidopsis Thaliana] (GB:Q39140;GB:Q9C7D1;GB:Q9LHI1); similar to AHBP-1B (bZIP transcription factor HBP-1b homolog), DNA binding / transcription factor [Arabidopsis thaliana] (TAIR:AT5G06950.3); similar to	39.58	48	29	1	410	553	63	109	0.4	31.6
All.Contig_1071	GAGACGAAGAAAGATCTCGGCAGAAGAAAARCAATGGAGTCTCCGAAGAAGATAGCTCATGAGATCGGCGGTGTCAAGAGAGACGCTCTTCGATTCGGTCTCAACGGCGTKAAGAGCGACATCGTCGGATCTCACCCACTCGAATCCTCYTACGAATCTGGAAAGAGATCGCACGAGGCGACGAAGAGGACGATCATTGGGCATACCTACGGGTCTGCACTTCCTTTGAAGATGGATATGGACAGACAAATTCTCTCACGGTTTCAAAGACCTTCTGGACCAATTCCATCGTCAATGCTCGGGTTAGAAGTCTACACAGGAGCCATTGATAACTTTGGTTTTGAGGATTACTTGAATGATCCTCGTGACTCGGAGACATTCAAGCCTGTAGACTTCCAC…	561	2	AT1G67250.1	proteasome maturation factor UMP1 family protein		similar to proteasome maturation factor UMP1 family protein [Arabidopsis thaliana] (TAIR:AT5G38650.1); similar to unnamed protein product [Vitis vinifera] (GB:CAO49284.1); contains InterPro domain Proteasome maturation factor UMP1 (InterPro:IPR008012)	87.23	141	18	0	34	456	1	141	5e-69	256
All.Contig_1072	GATTAACAGAATTGCCACCAGGAAGGACCAAGAAACAGACTTGAGAGAGAGTCATTACAATGATCTCTGTCTCCCGGTTGCTGTCGYCTCAATTCTACGCTATTCAACAAAGGAGCGTYGTGAAAATGTCTGCTTCTGCGACTCAAACGGCCGGAGGAGGAGTCTCTCACGGGTCAATGGCGATAAAGCCTCCTTCACACCCTACTTACGATTTGAAAGCAGTCATCGAACTAGCTCTAGCTGAAGATTCTGGTGACACAGGAGATGTAACGTGTATGGCTACGATACCGTTTGATATGGAGGTGGAAGCTTGTTTCTTGGCGAAAGAAGATGGGATTGTCGCTGGAATTGCTCTTGCTGAGATGATCTTTGAGCAAGTTGATCCTTCTTTGAAGGTGG…	834	3	AT2G01350.1	QPT (QUINOLINATE PHOSHORIBOSYLTRANSFERASE); nicotinate-nucleotide diphosphorylase (carboxylating)	At2g01350 encodes quinolinate phosphoribosyl transferase involved in NAD biosynthesis as shown by heterologous expression in E. coli.	similar to unnamed protein product [Vitis vinifera] (GB:CAO42261.1); contains InterPro domain Quinolinate phosphoribosyl transferase; (InterPro:IPR002638); contains InterPro domain Nicotinate-nucleotide pyrophosphorylase; (InterPro:IPR004393); contains In	87.98	258	31	2	60	833	1	253	1e-122	435
All.Contig_1073	GACACAATCTCACACTGCATCCCATAACATTGGAACTAAAAATAAAAACAGCAAACGTCGTCGTTTCACAATGCTCTCTTCTCCCCCAACCTTCTTCGCTCCTCCATTTCTCTCCTCCTCTCTCTCACCACCGTCTCGAACTTCCCGAATCTCGCCGCCTCTTTCTGCCACCACCACCGCCTCTTCCCGCTACACATGCGCCGACGATCCACCAAGACTGCGGCCTATCCCGCAGCGGTTGTCGGCGGCAGCGTCTCTCTACGAGATTCTCGAAATCCCCGTCGGCTCGACGAGTCAGGAGATCAAATCGGCTTACCGGCGGCTGGCGAGGATCTGCCATCCCGACGTGGCGGGAAACGGTCGGTCGGCGGACGAGTTTGTGAAGATCCACGCCGCGTA…	706	2	AT2G17880.1	DNAJ heat shock protein, putative		similar to DNAJ heat shock N-terminal domain-containing protein (J11) [Arabidopsis thaliana] (TAIR:AT4G36040.1); similar to DnaJ-like protein [Phaseolus vulgaris] (GB:AAB36543.1); contains InterPro domain Heat shock protein DnaJ, N-terminal; (InterPro:IPR	75.21	117	26	2	191	532	47	160	7e-40	160
All.Contig_1074	GGAACTGTCTTTTCTGTATACTTATGTATACTTTCCCCGGTTCCGTTGCTACTGCGGGCTTTACGCAATCGATCGGATCATCTAGATATCCCTTCAACRCAACATAGGTCGTCGAAAGGATCTCGGAGACCCGCCAAAGCACGAAAGCCAGGATCTTTCAGAAAATAAATTCCTATTCGAAGAGTGCATAACCGCATGGATAAGCTCACACTAACCCGTCAATTTGGGATCCAATTCGGGATTTTCCTTGAGGGATATTGGTAAGGAATTGGAATGTAATAATATCGATTCATAATGGATTCATATCGATACAGAAGAAAAGGTTCTCTATCGATTCAACAAGTGCTGTACTTATGGGAAAGCGATAGAGAAAGAGAAAAAAAAAAACGAAGATTTCAC…	562	6	no significant hit
All.Contig_1075	GGTTCATATTTGAATAATAATACTATTAAAACACATACTTGCTGCAATCGTTTCCTCATAGAGAAGTTGAGGAAGAAAAAGATGGGTATCCAAGAAACCGACCCGTTAGCCCAATTGAGTTTACCACCGGGTTTCCGGTTTTACCCGACCGACGAAGAGCTTATGGTTCAATATCTCTGCAGAAAAGCAGCCGGTTATGATTTTTCTCTCCAGCTTATTGCTGAAATCGATCTTTACAAGTTCGATCCTTGGGTCTTACCAAATAAGGCACTCTTCGGAGAAAAAGAGTGGTATTTTTTTAGTCCGAGAGATAGAAAGTACCCAAACGGGTCAAGACCGAACCGGGTAGCCGGGTCAGGTTATTGGAAAGCTACGGGTACGGATAAAATCATCTCGACG…	616	3	AT1G52890.1	ANAC019 (Arabidopsis NAC domain containing protein 19); transcription factor	encodes a NAC transcription factor whose expression is induced by drought, high salt, and abscisic acid. This gene binds to ERD1 promoter in vitro.	Identical to NAC domain-containing protein 19 (ANAC) [Arabidopsis Thaliana] (GB:Q9C932); similar to ATNAC3 (ARABIDOPSIS NAC DOMAIN CONTAINING PROTEIN 55), transcription factor [Arabidopsis thaliana] (TAIR:AT3G15500.1); similar to unnamed protein product	93.22	177	12	0	82	612	1	177	8e-98	352
All.Contig_1076	GGAAGATCTGAGGAAGAGGAAGGAGGAGGCTATAGGAAGCCTAGCTATGGAAGGTCTGAGGAACAGGAGGAAGGGAGTTACAGGAAGCCTAGCTATGGCCGTCGTAATGATGATGATGATGATGAGGAGCGCAGGAACCGTTCTGGTGATGATGAGGAAGGGAGCTATGGCCGCAAGAAATATGGTGGCAATGACTCTGATGATGATGAGGAGAAGAAGCAGCATCGTTACAAGCATCACCACCACCAGAGGCGTCGTGATGAAGACGATGACTAAAGCCCTCACTCAGTGCTGGAATCGAGTGCTTCTACTTAGCTTCATATTACTAAATAAAAAGCTAAGTCATATTTATCTTTGGATGTTRTTGTTGTGTTTGTTTGATTCTCTCTAGATACAGCA…	522	2	AT5G39570.1	unknown protein			76.81	69	13	2	2	199	250	318	9e-14	73.2
All.Contig_1077	GRAGGGAAGCGATTTGGGAAARGAAGGGGATGACGACGATTCGAAGATTCAGCTGCAACGACCTTCTCCGATTCACCTCCGTGAATCTGGACCACCTCACTGAAACATTCAACATGTCATTCTACATGACCTACTTGGCGAGATGGCCTGATTATTTCCATGTCGCTGAAGGTCCTGGCAATCGCGTCATGGGTTATATTATGGGTAAAGTTGAAGGGCAGGGTGAATCATGGCATGGTCATGTGACMGCCRTCACTGTYTCTCCAGAGTATCGCAGGCAGCAACTCGCCAAGAAACTCATGAACCTTCTTGAAGAGATCAGCGATAAGATTGACAAGGCCTACTTTGTGGATCTTTTCGTGAGAGCTTCCAACACACCAGCCATCAAGATGTATGAAA…	685	2	AT1G03150.1	GCN5-related N-acetyltransferase (GNAT) family protein		similar to GCN5-related N-acetyltransferase, putative [Arabidopsis thaliana] (TAIR:AT5G13780.1); similar to hypothetical protein [Trifolium pratense] (GB:BAE71298.1); similar to unnamed protein product [Vitis vinifera] (GB:CAO22531.1); contains InterPro d	98.85	174	2	0	30	551	1	174	4e-98	353
All.Contig_1078	GGATCACAGAGAGGGAGAGAGTGTGTGTGTGTATGCGATGGAGGTAACGCCGAAGAGGTATTGGCGGAGGTGGAGAGGATACGAGAAGCTTGATGGGTCATCAACAGCGGGAAGAAGGAATGGAAAACGGGTCAAAATGGATCCGACCAGCAAGAAACGCTCATGGAGGATCAAGATTATGCCGAAATTGAGGATTCTCAGAAGAGCGTCCCCTAAGAAGCTTCTCGTTTGGTTACGCGATTCTTATGTTAATATGATGATGCGGCTGGCGAATTCACGGGCTGTCGGACCTTCTGCATACGGTGGATCCAGTTTCGGGTCGGGTCAGATGAAGGAGTATGATGAGAAAGTGCTTGTGGAGATATACAAGTCCATATTGATGGCGAAGGCGCAGGGGAA…	606	2	AT3G62650.1	binding		similar to unknown protein [Arabidopsis thaliana] (TAIR:AT2G47485.1); similar to hypothetical protein [Vitis vinifera] (GB:CAN70481.1)	83.72	129	19	1	38	418	1	129	6e-58	220
All.Contig_1079	GATCTTCCTCAATTCTCCAATTCCCAGATCTGTTAGGGATTTCAAAAAGAGCCATGGAGAACGGGAAAAGAGACAGAGACGACATGGAAGTACAACCCTCCGCTAGAAAGCCACGTGTACTCCTCGCAGCAAGCGGAAGCGTCGCCGCCATCAAATTCGGGAACCTCTGCCACTGCTTCACAGAATGGGCGGAAGTGAGAGCCGTCGTCTCGAAGTCRTCTCTCCACTTCCTCGACAAGCTCTCTCTCCCACCGGAAGTGACTCTCTACACCGACGAAGAAGAGTGGTCGAGCTGGAACAAGATCGGCGATCCCGTGCTTCACATCGAGCTCAGACGCTGGGCTGACGTCATGGTCATCGCTCCTTTGTCTGCTAACACTTTAGCCAAGATAGCTGGTG…	639	2	AT3G18030.1	ATHAL3A (Arabidopsis thaliana Hal3-like protein A)	flavin mononucleotide flavoprotein involved in salt and osmotic tolerance HAL3A encodes for phosphopantothenoylcysteine decarboxylase being involved in Coenzyme A biosynthesis. HAL3A is predominant over another gene with the presumably same function (HA	Identical to Phosphopantothenoylcysteine decarboxylase (HAL3A) [Arabidopsis Thaliana] (GB:Q9SWE5;GB:Q6ID92); similar to ATHAL3B (Arabidopsis thaliana Hal3-like protein B), electron carrier [Arabidopsis thaliana] (TAIR:AT1G48605.1); similar to unknown [Po	93.33	195	13	0	54	638	1	195	4e-105	377
All.Contig_108	GATCATTATCTGATTCGGTTCCTCCGTCGTAATATCTCAGCTTCCGGTTATCTTAAGTGGCGGTGATGGCGGCAGCTCATGGACTGGTGGTTCAGAAAACAGAGGAGGAGTGGCGTGCGATCCTTTCTCCTGAGCAGTTTAGGATCCTCCGACAAAAAGGCACTGAAATACCAGGAACTGGGAGAATATGACAAATTCTTCGAGGATGGAATTTTCAGCTGTGTCGGATGCAAAACTCCTCTCTATAAATCCAGCACAAAGTTTGACTCCGGATGTGGTTGGCCAGCTTTCTTTGAAGGACTCCCTGGTGCCATTAACCGAACGCCTGATCCAGATGGGATAAGTACAGAGATCACTTGTGCAGTATGCGACGGGCATTTAGGCCATGTTACAAAAGGA…	612	2	AT4G04830.1	methionine sulfoxide reductase domain-containing protein / SeIR domain-containing protein		similar to methionine sulfoxide reductase domain-containing protein / SeIR domain-containing protein [Arabidopsis thaliana] (TAIR:AT4G04810.1); similar to hypothetical protein [Vitis vinifera] (GB:CAN83184.1); contains InterPro domain Methionine sulphoxid	88.66	97	11	0	181	471	38	134	4e-64	194
All.Contig_1080	AAGGCGTCAATCCCTCTTAACCAAGCCACAAATCCTGGAGCCGATGTTTTACTCGCTTATGAGATGAATGGAGAGATCCTGAACAGGGATCACGGGTATCCGTTAAGGCTGGTTGTCCCGGGTGTGATTGGTGCTCGTTCGGTTAAATGGCTTGATTCCATCAATGTAATCGCTGAAGAATGCCAGGGATTTTTCATGCAAAAAGATTACAAAATGTTCCCACCTTCTGTCAATTGGGACAATATTGACTGGTCCACAAGGAGGCCCCAAATGGATTTCCCTGTTCAGAGTGCAATCTGCTCTTTGGAGGACGTGCAAATGGTGAAGCCTGGAAAGGTAAGCATCAAAGGATATGCGGTTTCTGGAGGTGGGCGAGGGATCGAGCGAGTGGATATATCA…	863	2	AT3G01910.3	SOX (SULFITE OXIDASE)	Encodes a homodimeric Mo-enzyme with molybdopterin as organic component of the molybdenum cofactor. It lacks the heme domain that other eukaryotic Mo-enzymes possess and has no redox-active centers other than the molybdenum. SO protein has been found in	Identical to Sulfite oxidase (SOX) [Arabidopsis Thaliana] (GB:Q9S850;GB:Q9SNW2); similar to NIA1 (NITRATE REDUCTASE 1) [Arabidopsis thaliana] (TAIR:AT1G77760.1); similar to Sulfite oxidase, putative [Brassica oleracea] (GB:ABD65019.1); contains InterPro	93.27	223	15	1	1	669	20	241	2e-118	422
All.Contig_1081	CACGAAAACGCAGAAACTGAAGCAGAAGATCGCAAACGGAGAAACTGGAAACGTTGATTATTACGGTTTGATCGGAGTGAGACGCGGTTGTACCAAATCGGAGCTGGATCGAGCTCATCTMTTGCTGTGTTTACGWTACAAACCTGATCGRGCCTCGTCTTTTATTGATCGGTGYGAGTTCACCGATCAAAACGAAGTTGATTCGGTTAGAGATCGAGCGAAGATGTCTTCGCTGCTTCTCTACCGTTTGATTCAGAAAGGATACGCTGCTGTGAAGGGTATCATAGGCGAGGAGGCAGAGGCGGCTGAGAAACGGAGAAAGAACGCTGCGGCGGTTCAAGCGCCAGCTCAGACGCCAATGCACAAGGTTGAAGAGCAGAAAGCGGTTAAAAAAGCCGT…	756	3	AT2G47440.1	DNAJ heat shock N-terminal domain-containing protein		similar to DNAJ heat shock N-terminal domain-containing protein [Arabidopsis thaliana] (TAIR:AT3G62570.1); similar to unnamed protein product [Vitis vinifera] (GB:CAO40097.1); contains InterPro domain Heat shock protein DnaJ, N-terminal; (InterPro:IPR0016	71.14	201	55	3	2	595	356	526	4e-66	248
All.Contig_1082	GCCCCTAAATTTGCTCTGGTCAGAAAGTTCTAAACAGAAGAGCTCAGGCCACCGTCGTCGTTATTGATTTACAGATCAAACTTTGCTGAATTCCCGATTAGATCTTTCTTCTAAGGTTCGACTTGACATTGCTCGGGTTCCTCCTGCTCGGGGGGCATCAATTGATGGGTCGCTCTCGTCGCAACTTCCAAAATTTCGAAGACCCTACCCTTAGAACGAGGAAAAAGAAAAACGCAGCTAATGTGGACACCTTTGAGTCTTCATCTATCGTTCAAGGTACGGAGGGAGGAGGGAAGTACAACTGCGATTATTGTCAGAAAGACATCACTGGCAAGATCAGGATCAAATGTGCTGTTTGTCCTGATTTCGATCTCTGCGTTGAATGTATGTCTGTTGGTG…	698	2	AT4G16420.1	ADA2B (PROPORZ1); DNA binding / transcription factor	Transcriptional co-activator. Essential for the developmental switch from cell proliferation to cell differentiation in response to variations in auxin and cytokinin concentrations.	Identical to Transcriptional adapter ADA2b (ADA2B) [Arabidopsis Thaliana] (GB:Q9ATB4;GB:O23486;GB:Q3EA06;GB:Q3EA07); similar to ADA2A (Arabidopsis adaptor 2A homolog), DNA binding / transcription factor [Arabidopsis thaliana] (TAIR:AT3G07740.1); similar	91.57	178	15	0	165	698	1	178	6e-98	353
All.Contig_1083	GATTCGAGTTCGTTCCGAGCTGAGCTGAGCTGAGAAAAACCCTAATCTCTCCTCCTTTTCCATCGTCTTCTCCGATTCTGCAAGCATGAGTCGATCAGGTCAACCTCCGGATCTCAAGAAGTACATGGACAAGAAGCTCCAAATTAAGCTGAATGCCAACAGAATGGTGGTTGGAACTCTCCGTGGGTTTGACCAGTTCATGAATYTTGTTGTGGATAACACTGTTGAAGTCAATGGTGATGACAAARCTGACATTGGCATGGTGGTGATAAGAGGAAACAGCATTGTCACCGTTGAAGCGCTTGAACCAGTTGGAAGATCTTAGCTTTCTTATTACTTTGCACTATCCGTCACCATCTTCTGTATTTTGACTCTCTGTATTGAAACTTAATTAGTAGA…	453	2	AT3G11500.1	small nuclear ribonucleoprotein G, putative / snRNP-G, putative / Sm protein G, putative		Identical to Probable small nuclear ribonucleoprotein G [Arabidopsis Thaliana] (GB:O82221); similar to SNRNP-G (PROBABLE SMALL NUCLEAR RIBONUCLEOPROTEIN G) [Arabidopsis thaliana] (TAIR:AT2G23930.1); similar to unknown [Populus trichocarpa] (GB:ABK93558.1	97.4	77	2	0	92	322	3	79	4e-37	150
All.Contig_1084	CGAGATTGAGGCCACTGACATGACTTCCCTTGAGGCTGTGATGAGCTGTGACGAGGAGAGGTTGAAGTTGGAGAAGGTGATTGAGACTCTTGTTGAACAGGATGATGGAGGCGGAGAGAGGCTTGACACTATCTATGAGAGGTTGGAGGCCATGGATGCTTCAACCGCGGAGAAGCGTGCTGCTGAGATTCTGTTTGGGCTTGGATTCGATAAGGAGATGCAGGCTAAGAAGACTAAGGATTTTTCTGGTGGGTGGAGGATGAGAATTGCGTTGGCGAGAGCTCTCTTCATTATGCCGACTATCCTTTTGCTTGATGAGCCCACTAATCATTTAGATTTGGAAGCTTGTGTCTGGTTAGAAGAGAGCCTGAAGAACTTTGACCGTATCCTCGTGGTGGT…	1012	2	AT5G60790.1	ATGCN1 (Arabidopsis thaliana general control non-repressible 1)	member of GCN subfamily	similar to ATGCN3 (Arabidopsis thaliana general control non-repressible 3) [Arabidopsis thaliana] (TAIR:AT1G64550.1); similar to unnamed protein product [Vitis vinifera] (GB:CAO16780.1); similar to ATP-binding cassette transporter [Pteris vittata] (GB:AAS	92.98	57	4	0	837	1007	411	467	0	114
All.Contig_1085	GATACAAAAACCTAGACGTCGTCGGCTCKGTTTTCAACCGCCGAGCAAACAGATTTTGTGATGGCAGCTAATGGATCAGCTTCACCGACGGAAGACGGCGGAGGAGTAAGTAACATGGAGAAGTTTCTCTGCGAGCGATTGTTAGACCAGTCGCAGCCTATCTCAGAGCGATTCAGAGCTCTCTTCTCTCTCCGCAACTTGAAAGGCCCTGCACCTCGCARCGCTCTAATCCTCGCGGCCAGAGACTCATCMAACTTGTTGGCGCATGAAGCTGCGTTTGCGTTGGGACAGATGCAAGACGCTGAAGCRGTTCCTGCTCTAGAGTCGGTTCTTAMTGATATGTCTTTGCATCCTATAGTRCGCCATGAGGCAGCAGAAGCTCTTGGAGCCATTGGTTTA…	589	2	AT3G58180.1	PBS lyase HEAT-like repeat-containing protein		Identical to Deoxyhypusine hydroxylase [Arabidopsis Thaliana] (GB:Q94JW0;GB:Q9M2J8); similar to PBS lyase HEAT-like repeat-containing protein [Arabidopsis thaliana] (TAIR:AT3G62530.1); similar to unnamed protein product [Vitis vinifera] (GB:CAO70690.1);	79.56	181	32	3	61	588	1	174	7e-55	209
All.Contig_1086	GACACTTAACACAATCTATTTTATAATTCATAATATCCAAGCCAAAAAAAGAGATCCATGTCGGTAATTGTGTGGTGGCTAGTAACGGTGGTTCTGGTGGCGGTTCACTCGGCCTCCGCCAGAGTTGTAGAATTAGGCTGGGAAGTAGAGTATAAGTTCTGGTGGCCAGATTGTAAAGAAGGCATCGTTATGGCTATCAACGGCCAGTTCCCGGGGCCAACGATTGATGCTGTCGCCGGAGACATCGTCATCATTCACCTCACCAACAAACTCTCCACCGAAGGTGTCGTCATCCATTGGCACGGCATACGTCAGAGAGGGACTCCATGGTCAGATGGAGCAGCTGGTGTGACACAGTGTCCCATTAATCCTGGCGAGACTTTCACTYACAATTTCACA…	889	2	AT5G21100.1	L-ascorbate oxidase, putative		similar to L-ascorbate oxidase/ copper ion binding [Arabidopsis thaliana] (TAIR:AT5G21105.1); similar to ascorbate oxidase [Brassica juncea] (GB:AAF20933.1); similar to ascorbate oxidase [Brassica juncea] (GB:AAF20931.1); similar to ascorbate oxidase [Bra	85.04	254	37	1	130	888	25	278	2e-124	441
All.Contig_1087	GATGGTCAAGTGAAATGAGAAATAAGCAAAGAAAGAGAGATATGAAGATGAGAGGATCTGATCAGAAGAATATACTAATTGTTATGATGGTTGTAATAGTTGCAGCGACGGCTCGAGGTGAAGACGGGTTCGTGACATGGGGCGATAACTACTACACAACATGGGGACATCCAGCTTTGGTTATTAATGAAACCTCTGAGCTCCAGCTCACCCTCGATCATAAATCTGGGTCCGGGTTTGAGTCCTACAAGATATACGGATCAGGATCTTTCAACATCAGAATCAAGGCACCCCAAAGCAAGTCTACGAAAGTGACTACTTCCTTCTACCTAAGATCCAAATCAAGCCGCAATGACGGGCTCTGTTTCCAGATTTTTGGAAACGAAACAGCGTATTTGC…	646	3	AT3G48580.1	xyloglucan:xyloglucosyl transferase, putative / xyloglucan endotransglycosylase, putative / endo-xyloglucan transferase, putative		Identical to Probable xyloglucan endotransglucosylase/hydrolase protein 11 precursor (XTH11) [Arabidopsis Thaliana] (GB:Q9SMP1); similar to XTH3 (XYLOGLUCAN ENDOTRANSGLUCOSYLASE/HYDROLASE 3), hydrolase, acting on glycosyl bonds [Arabidopsis thaliana] (TA	72.91	203	51	2	48	644	1	203	2e-79	291
All.Contig_1088	GAACAGGCSGTGCAATGGAACTCTCAATAATTCCGGCCGTGGTTACGGTCCTCTTTTTTCTTGTAACTCTCTTCTTTTTCTCCACCGCAAGAAATCGGAGGAACTCCAGCTACGGCGGCAATGGCCAAGGCTCACTTCCGCCGGGTCCTCCGGGACTCCCATTGGTGGGAAACATATTCCAACTCGGCTTCAGTCCTCACCGTTCACTTGCTGTCTTTTCGAAAACATATGGCCCTATAATGAGTTTAAAGCTTGGAAGGTTAACCGCAGTGGTTATATCTTCACCAGAAGCAGCTAAAGAGACACTTAAAACACACGACCATGTCATGTCTGCTCGAACCTTTAACGACCCGATCCGAGCCTTTGACCATCATAAACATTCCGTTATTTGGATTCCTG…	603	2	AT2G45580.1	CYP76C3 (cytochrome P450, family 76, subfamily C, polypeptide 3); oxygen binding	member of CYP76C	Identical to Cytochrome P450 76C3 (CYP76C3) [Arabidopsis Thaliana] (GB:O64638;GB:Q8GXM0); similar to CYP76C4 (cytochrome P450, family 76, subfamily C, polypeptide 4), oxygen binding [Arabidopsis thaliana] (TAIR:AT2G45550.1); similar to unnamed protein pr	89.02	82	9	0	171	416	50	131	3e-39	158
All.Contig_1089	GGKGCAATGGAACTCTCAATAATTCCGGCCGTGGTTACGGTCCTCTTTTTTCTTGTAACTCTCTTCTTTTTCTCCACCGCAAGAAATCGGAGGAACTCCAGCTACGGCGGCAATGGCCAAGGCTCACTTCCGCCGGGTCCTCCGGGACTCCCATTGGTGGGAAACATATTCCAACTCGGCTTCARTCCTCACCGTTCACTTGCTGTCTTTTCGAAAACATATGGMCCTATAATGAGTTTAAAKCTTGGAAGGTYAACCGCAGTGGTTATATCTTCACCAGAAGCAGCTAAAGAGRCACTTAAAACACACGACCATGTCATGTCTGCTCGAACCTTTAACGACCCGATCCGAGCCTTTGACCATCATAAACATTCCGTTRTTTGGATTCCTGCATCGGCT…	635	2	AT2G45580.1	CYP76C3 (cytochrome P450, family 76, subfamily C, polypeptide 3); oxygen binding	member of CYP76C	Identical to Cytochrome P450 76C3 (CYP76C3) [Arabidopsis Thaliana] (GB:O64638;GB:Q8GXM0); similar to CYP76C4 (cytochrome P450, family 76, subfamily C, polypeptide 4), oxygen binding [Arabidopsis thaliana] (TAIR:AT2G45550.1); similar to unnamed protein pr	84.71	157	24	0	163	633	50	206	8e-72	266
All.Contig_109	GATCCAAATCCATTCCTTACTTAAGAAAAAAAAAGAAATACAAAAAGTTAAGATTATGGAGGGGCTCCTTAAAGTTGTCGACGTTGGTGRTTGTGTGCATGCTAGTGTCCGCTCCAATGGCGACCGAGGCAGCAATATCGTGTGGCGCAGTCGCCAGCAACTTGGGCCAATGCATCAACTACCTGACAAAAGGTGGTTACATTTCTCCAGGGTGTTGTTCTGGCGTTCGGACGCTCAATAGCATGGCTCGGACCACCACTGACCGCCAGCAAGCTTGTCGTTGCATCCAAGGAGCAGCTAAAGCCTTGGGTTCTAGACTTAAYGCACGCCGTGCTGCTGGTCTTCCTGGTGCTTGCCGYGTTAGGATCTCTTACCCCATCAGCGCAAGAACCAACTGTA…	531	2	AT3G51600.1	LTP5 (LIPID TRANSFER PROTEIN 5); lipid transporter	lipid transfer protein 5	Identical to Non-specific lipid-transfer protein 5 precursor (LTP5) [Arabidopsis Thaliana] (GB:Q9XFS7); similar to LP1 (nonspecific lipid transfer protein 1) [Arabidopsis thaliana] (TAIR:AT2G38540.1); similar to lipid transfer protein [Brassica oleracea]	82.76	116	20	0	63	410	3	118	7e-51	196
All.Contig_1090	GTCTCCTCACCGTTAAAAGCAAGAGACCTACTCTGCATCAGAGGTGGGAAGGTTTTCTCGGGGAGAGATCGGACGGTCAGAAACCGATCTTCAGCGTTCGGAGATCGTCGATAATCGGACGGTGCACGATGGAAGTAGAAGTATACGACGAAAGCGGAAAAGAGTACACCATAGACGGCGACTTCTCCTTGCGAAGCTGTCTCATATACGACACGGAGAAGCGAACCGTGGCWGAGATCRAACGCAAAGTGGACATGTCAACGAACGTGATGCTTGGACGAGATGTGTTCACTCTCGAGATCAAACCCGGTTTCGACRGCGCTTTCGCGATGGGTTTGGTCCTCGTGCTTGACCAGATCAACGGTGATGATCCCGTTGAGATTGGTGATGAGCAAGTAC…	616	2	AT3G15810.1			similar to unknown protein [Arabidopsis thaliana] (TAIR:AT1G80120.1); similar to unknown [Populus trichocarpa] (GB:ABK95691.1); contains InterPro domain Protein of unknown function DUF567 (InterPro:IPR007612)	90.58	138	13	0	3	416	83	220	6e-68	253
All.Contig_1091	CGAATCTGATCTGCAAGTGAAGCTACACAAATTAACTTACCAATATCAGAATTCAATTACAAAATCTTAAGAAAAACAAATTAATAGAAAAAGATATGGAGAACATGGACGTTATCTCACCGNGAAAACGCCTCAGGGCCACCATCACCACCTCCTCCTCCCGTAAGGTCAAACTCCGGTACGATGTGGAAGAAGTCAACGCTACAARAATGCAATATCTTTGCTTCTAAAGCTACAAGAGATGCATGGGATCGTATGTTTGACGAAGCTCATGGAGCTGATGTTTTGATTCATACGGATGATAATGGCTTGATCTACGCGCATTCTAACGTCATCGGAATGGCTTCAGATGTTATCAGAGGACTGATGAAGCAAGATAAGAGAAACTCCCGACGCAAA…	763	2	AT4G37610.1	BT5 (BTB and TAZ domain protein 5); protein binding / transcription regulator		similar to BT4 (BTB AND TAZ DOMAIN PROTEIN 4), protein binding [Arabidopsis thaliana] (TAIR:AT5G67480.2); similar to BT4 (BTB AND TAZ DOMAIN PROTEIN 4), protein binding / transcription regulator [Arabidopsis thaliana] (TAIR:AT5G67480.1); similar to unname	84.54	194	27	1	190	762	23	216	6e-91	330
All.Contig_1092	GGTCTTCTCTCCTTCACTSACACACAAATCTGCAAAGACAGAACACAAACTCATAATCACAAAAGAAGGATACTTCTGATTCAGATCTGAACAAAGTTATGGATYGTTATTCAARGAGGAACGGTGAGGATCTAGTCGTGCCTARCTATCAGGAGACATCGGATTCATACCAATCTTCTGATATGTGGGGTGGATGGARCATGAACTCCCAGAAAGCTGCGGAGAAGTGCTTTGACTTCGATGTGATTAACAATGGATTCAGCGGAGGGTTATACAGTCAGATGGATATGGAGATGGAGATGGAGATGGGGACGAGTGGAGAAGTAAAACAAGAAGAAGAAGATGAGGAATCAAAGAGGTTCAAGTCTGCTGGTTGTTTCTATAACTCTACTTCGTCGC…	1181	3	AT5G06980.1			similar to unknown protein [Arabidopsis thaliana] (TAIR:AT3G12320.1)	65.77	260	87	10	99	872	1	234	2e-88	294
All.Contig_1093	GACCCAAAAACATAATCGTCAATMTCAGCAAAACAAAACAAAATACAGAGAAATGGCGACGACAACAACAGAAGCAACGAAGACTTCTCCTACCAACGGAGAAGACAAGCAATCTCAGAATCTCCGACACCAAGAAGTCGGTCACAAGAGTCTCTTACAGAGCGACGATCTCTACCAGTATATTCTGGAGACAAGTGTGTATCCAAGAGAACCAGAATCAATGAAAGAACTCAGGGAAGTGACAGCAAAACACCCTTGGAACATAATGACAACATCGGCAGATGAAGGACAGTTTCTCAACATGCTCATCAAGCTCGTTAACGCCAAGAACACGATGGAGATTGGTGTTTACACTGGCTACTCTCTCCTMGCCACCGCTCTTGCTCTCCCTGAAGACGG…	778	6	AT4G34050.1	caffeoyl-CoA 3-O-methyltransferase, putative		Identical to Probable caffeoyl-CoA O-methyltransferase At4g34050 [Arabidopsis Thaliana] (GB:O49499;GB:Q8L989); similar to caffeoyl-CoA 3-O-methyltransferase, putative [Arabidopsis thaliana] (TAIR:AT4G26220.1); similar to caffeoyl-CoA 3-O-methyltransferas	100	10	0	0	745	774	233	242	8e-121	23.1
All.Contig_1094	GGGCGTCACTCGATTTTTTAAATCKGTAATAATTATAATTTTCYTCCGACATTGGCGTCTCTCTCTCTCTCTCGATCGAAGCATTCYCAAATCTGTGTTCTTGAGATTCAGATGTATCCTTCTCTCGACGATGAAGATTTCGTCTCTGATTTCTTTTGCTTCGATCAAAGCAATGGAGCAGAACTCGATGATTACACACAGTTCGGTGTAGATTTGCAGCCTGATCAAGCAGGTACCTTCCCAGATTTTGGGTCATACGGTGTCAATCTACAGAACGAACCACAACAAGTTTTCAACATCGGAGATTTGAMATCGTACGGTGGAGTTTTAACGCAAGAGCCAGGGGAGTTTCATAACTTTGGAGGGCCAAATGATTGTGGAACTGTGCAGGAAGATGAA…	586	2	AT4G14410.1	basic helix-loop-helix (bHLH) family protein		similar to basic helix-loop-helix (bHLH) family protein [Arabidopsis thaliana] (TAIR:AT3G23210.1); similar to unknown [Picea sitchensis] (GB:ABK23190.1); contains InterPro domain Basic helix-loop-helix dimerisation region bHLH; (InterPro:IPR001092); conta	73.46	162	39	3	112	585	1	157	1e-47	185
All.Contig_1095	GGCAGAGTAAAATCCGAAGAAAGTCTCCATCTTTCTTTCTTTCTGGGTTTCCTGTTTATCAAACCAAAGCAATGATTCACTAAACCCTCTGCTTCCGTGGATTCAGAGTAAAAGAACAATGACTGTTACAGGCGTTAGCAATAGTGCTAAATCCACAGCATTAGCATCTGTATATTCAGTACGCAAGCTCCCGTTTCTCTCTCTCTCTGAATCGTTTCCTTGCCCCAAGAATTCTAGAAAACCAGCGTCTCCTACTCCTTTAAGATGTAGATGGACATCAAGATCGGATTCGCTCTGCGGAAAATTTAGAGTTCATGCATCAAATGCTGGTGTTGGATCTGGTAGTGAGGAGGATGGATCTCAAAGTAGTTCTCTTGATCGGTCTCATGCCACCTCATC…	887	2	AT4G13590.1			similar to unknown protein [Arabidopsis thaliana] (TAIR:AT1G64150.1); similar to unnamed protein product [Vitis vinifera] (GB:CAO71558.1); contains InterPro domain Protein of unknown function UPF0016; (InterPro:IPR001727)	80.84	261	45	3	119	886	1	260	4e-102	367
All.Contig_1096	TACTGTGATGAGCAAGTCCCCAAACAAGCACAACCGTCTGTACATGGAGGCTAGGCCCTTGGAGGATGGTCTTGCGGAGGCAATAGATGACGGCCGTATTGGTCCAAGAGATGATCCCAAGATACGTTCCAAGATATTGGCTGAGGAGTTTGGTTGGGACAAGGATCTTGCAAAGAAGATATGGGCGTTTGGACCAGAAACCACAGGGCCCAACATGGTTGTTGACATGTGTAAGGGAGTTCAATACCTGAATGAAATCAAGGACTCTGTTGTTGCTGGGTTCCAGTGGGCTTCCAAGGAAGGTCCTCTTTGTGATGARAACATGAGAGGRATCTGCTTTGAGGTYTGCGAYGTKGTGCTCCACTCYGATGCTATCCACAGAGGTGGTGGTCAGGTTAT…	912	2	AT1G56070.1	LOS1 (Low expression of osmotically responsive genes 1); translation elongation factor/ translation factor, nucleic acid binding	encodes a translation elongation factor 2-like protein that is involved in cold-induced translation. Mutations in this gene specifically blocks low temperature-induced transcription of cold-responsive genes but induces the expression of CBF genes and muta	similar to MEE5 (maternal effect embryo arrest 5), translation elongation factor/ translation factor, nucleic acid binding [Arabidopsis thaliana] (TAIR:AT1G06220.2); similar to MEE5 (maternal effect embryo arrest 5), translation elongation factor/ transla	94.8	269	14	0	2	808	575	843	5e-149	523
All.Contig_1097	TCAGAGACGAAACAGCTTTATGGACAAAGATCGTTGTTGAACCACCCCTGCGTTCTCGTCTAACCGATGGTATTCTACGGGAGATCACTTCCAAATCCGCCGGAAAATTAAACACTCTGATTCTCCGACAGTGTCTTAGGATCACCGACAAGGGACTTCGACGTGTGGTGGACGCAAATCCTCTGATAAGAAAGATAATTGTGCCCGGATGCACTGAACTGACTCCAGAAGGAATCATTGGATGCGTTGAAAGCTTAGCAACCGTGGAGACACTTCACATCAACGGCGTACATCGCTTCACTAAAGACCATCTCTCAGCACTCTCCACTTACCTTCCTCACGAGGGCGCCATAGATGTCGAGGTCTGTCCCAAATGTGACCTAGTCAAGATGATTCCCT…	746	2	AT2G01620.1	MEE11 (maternal effect embryo arrest 11)		similar to F-box family protein [Arabidopsis thaliana] (TAIR:AT3G26000.1); similar to unnamed protein product [Vitis vinifera] (GB:CAO42341.1); contains domain SSF52047 (SSF52047); contains domain PTHR23125 (PTHR23125); contains domain G3DSA:3.80.10.10 (G	74.7	249	57	5	3	731	48	292	4e-106	380
All.Contig_1098	GGTGTGTTCTGGTGGTACCACATGTCCCATCCGATAAAATAGTTTCATTTATTCCACGGTTTAGGCCACTCGAAGTGTATTGTTTTCTGCTTCAGTGGTTGAGCCAATCTCCGATGGAAGCTCCAACTCTAGAGTTTCGATTCATCTTCTTCCTCTGGAACCTGAATTTCACCAGTTACATATTCATCTTCTTTTTAAAGTCCTCCTTGATTTCATCATCCACAATCTATATTTATAGACTGCTTTGGTCTTGCAAGGCGGTGGAGGAATCTCGGTTTAAAAAGGATACTGAATCAATGAGACACAAGTTACAGAGTATGCGAGAGAGAAAGGCAATACTAATGGGCGAAGTCCGATTTCTTCGGCGGAGATACAGACRGTTGAGACAAGACCAGCCTG…	775	2	AT5G57910.1			similar to unknown protein [Arabidopsis thaliana] (TAIR:AT4G30630.1); similar to unnamed protein product [Vitis vinifera] (GB:CAO66657.1)	85.71	14	2	0	715	756	191	204	8e-31	29.6
All.Contig_1099	GACATCAACTCCAAAGTTCTATAGAGAGAGAGAGTAAAGAGCAGACATAGAGACAGAGATARGATGGCCATGGCAACAAAATCAGTTTCTTCCTTCACCCTTATTTTCATCCTCGTTTTGGTTATTTTTGAAGTGCCGGAGATAAAAGCGCAGGATAGCGAGTGCCTGAAAGAATACGGAGGCAACGTGGGTTTCAACTTCTGTGCGCCTCGGATTTATCCGTCGTTTTGTTATACAAGATGCCGTGAGGACAAGGGCGCGAAAGGTGGGATATRCCGTTGGGGAGATTCCCCTGATTCTGTTAAATGCTTATGCGAATACTGCAGCGACGAAATTTCTCACCAGATTCTAAGTGGCGGTATTTGAATCATTCATGCGTGATGGTTTGTGTAATAATAA…	494	2	AT1G47540.1	trypsin inhibitor, putative		Identical to Putative trypsin inhibitor At1g47540 precursor [Arabidopsis Thaliana] (GB:Q42330;GB:Q9SX84); similar to ATTI2 (ARABIDOPSIS THALIANA TRYPSIN INHIBITOR PROTEIN 2), trypsin inhibitor [Arabidopsis thaliana] (TAIR:AT2G43520.1); similar to putative	63.54	96	34	1	70	354	1	96	6e-32	133
All.Contig_11	GGACTTTTTTTTGCTTGGTTTCCGACAGAAACAGATCGGAGAGTGGATTAGAGGAAAAAGGAAAAAAAAAAACCAAACAAAAAGGAAAGGTTGAGATCTGAAGGAAGAAAGAAGAAGAAAAAGAAGGTGGAAGCAGATAACATGTCTGCGATTGTTTGCGGTAGCAAGAGATCTCTGTTCGAGGATTTGTCCGCCGCTTCTTCCCCTCCCGTCTCCAAGAAACTCCGTTACTTYTCATCCTCTTCTCCGCCKCGTTTTCCCCCTCCTCCTCCTGCCTCCTCCTCGCTTCTCCTCGATCACCTCGCCGCGATTTTCCCCGATATGGATCATCAGATTCTTGAGAGGGCAATCGAGGAATGTGGAGATGATATTGATTCTGCGATTAGATGTTTGAATCAG…	768	4	AT5G32440.1			similar to unknown protein [Arabidopsis thaliana] (TAIR:AT1G80040.1); similar to unknown [Populus trichocarpa] (GB:ABK95835.1); contains InterPro domain Ubiquitin system component Cue (InterPro:IPR003892)	76.47	204	40	7	142	729	1	198	8e-64	240
All.Contig_110	GACCTTTAGGGTTCTCGTCTCCAAATCGCTTTCGAATCCAATCCCCTGGGTTTCTCTCCTCCAGTTTTCGATTTCAATCTCTTTGTCGTGAGAAGCGATGGGAAGAGGCAAGTTCAAGGGGAAACCTACTGGCCAGCGCCGATTCTCAAGTGCAGCTGATATTCTTGCTGGAACTTCTGCTGCGCGTCCTCGGTCATTCAAGCAGAAAGAAGCTGAGTACGAGGAAGATGTTGAAGAGGAGTCTGAAGAGGAATCTGAAGAGGAATCCGAAGATGAATCTGATGTGAAGAAGAAAGGACATGAAGCTCTTATCGAAGTTGACAATCCTAACAGAGCCAAACCAAAGACTTTAAAAGCTAGARACCTTGATGCTAGTAAAACCACTGAACTCTCAAGGCG…	750	2	AT5G46020.1			similar to unknown [Populus trichocarpa] (GB:ABK93798.1); contains domain PTHR22055 (PTHR22055)	94.29	140	8	0	98	517	1	140	1e-41	166
All.Contig_1100	GAAGAATTTTTAGAGTTGTCTCTCTCTCTCTCTCTGTTGCTCACTCTTCCAGATTTTAGTACCTTCTGAAAGCTTCTAAAAAATAAGAGAAAATGACCAAGTTTTGGACTTTGGTCACTGCTCTTCATACAGGCGCTGGGCCTGTGGTGATGTTGGTGTATCCATTGTACGCATCGGTGGTAGCGATGGAGACCGCAACTAAAGTTGACGACGAACAGTGGCTATCCTACTGGATCATATACTCGTTCCTCACCCTCACAGAGCTGATTTTGCAATCTCTCCTTGAGTGGATTCCTATTTGGTACTCGGTCAAGCTTGTGTTCGTCGCTTGGTTGGTTCTGCCTCAGTTCCATGGCGCAGCGTTCATCTACAACCGTTTGGTTAGAGAACAGTTCAAGA…	513	3	AT4G24960.1	ATHVA22D (Arabidopsis thaliana HVA22 homologue D)	Homologous to a eukaryote specific ABA- and stress-inducible gene first isolated from barley. Groups in one subfamily with ATHVA22E.	Identical to HVA22-like protein d (HVA22D) [Arabidopsis Thaliana] (GB:Q9S760;GB:Q9SW30); similar to ATHVA22E (Arabidopsis thaliana HVA22 homologue E) [Arabidopsis thaliana] (TAIR:AT5G50720.1); similar to hypothetical protein OsI_034972 [Oryza sativa (ind	82.22	135	21	1	93	488	1	135	8e-56	212
All.Contig_1101	GTGATGAGCTCTGCCAAAGGAGGATCCTCTGTTTCTATCAGAGGCGGCGGTATGACTTTCCCCAAGAAACTCTAAAAGTTACTTCCTCCTCCTTTTTTTAGATTCCCAATCTTTTGTAGCTACGTATGAAAATGTTTTACTCTTTGTTGTTTGTATAAGAATGTATAATTGTAACGTGAAAGCCACACTCTACTGACGTTTGGAAACTCAATTCCAGTAATCATTTAATTTTTATTTATTCAGCAAACTTTGTGTAATGAAGGATGTAATTGTTGTTGATGGTGAATGAATGTAGTTGGCCTTTCTTATGTCAAAAAAACAAAAAAAAAAAAAA	334	2	AT2G46450.1	ATCNGC12 (cyclic nucleotide gated channel 12); cyclic nucleotide binding / ion channel	Member of Cyclic nucleotide gated channel family.Positive regulator of resistance against avirulent fungal pathogen.Suppresses the phenotype conferred by cpr22 in a dosage-dependent manner.	Identical to Probable cyclic nucleotide-gated ion channel 12 (CNGC12) [Arabidopsis Thaliana] (GB:Q8GWD2;GB:Q9SKD5); similar to ATCNGC3 (CYCLIC NUCLEOTIDE GATED CHANNEL 3) [Arabidopsis thaliana] (TAIR:AT2G46430.2); similar to ATCNGC3 (CYCLIC NUCLEOTIDE GA	34.62	26	17	0	80	157	58	83	8.3	25.4
All.Contig_1102	TGAAAGAGAGGATATCAACGGCAAAAAGTGATCATCACGGGTTTCGTATGTGTGAAGTGAAAATGCTGAAGCGAGGATGAAGTTTGCTTCGGTGGATGCTTTATCAGAGTTAGTGTGGTCTCCTCGTAACGGTCTTAGCCTAAGATGTGCTGATTTTAGTTTCACGGGTAAAAATCCGAAACTACTCTCTCCTAGTGTCTTTGATGATATAGCACAAACCAACAACAACAACAACAAGATGGAGTCTCAGTCCAAAAGTAATAGTATCCAACACCAAGAAGAAGAAGCTGACGAAGTAAACCAAGCGTGTAGCGAAAAGAACAGACCATTGTCAGGGATTGGTGGTTCTGTTGAGGATACCAAACCTGGAAGAGAAGAGATGGAGACCAATGATGATGT…	606	2	AT5G43630.1	zinc knuckle (CCHC-type) family protein		similar to unnamed protein product [Vitis vinifera] (GB:CAO71305.1); contains InterPro domain Zinc finger, CCHC-type; (InterPro:IPR001878); contains InterPro domain Plus-3 (InterPro:IPR004343)	46.32	190	89	9	62	592	30	204	1e-28	123
All.Contig_1103	GACAAGTCATACCACCAAACTTCCATTTCAGCTCTATCTCTCTCTTGTTCGAGATCCTTCTTCTTCTTCTGCAAATCCATCACCTGATTCYCAAGTTATCATCGACCATGATCTCTGTCGTAATCCTCGCCGAGCTAATGGTGGAGTACACATCAGCTATCGCTAAACTCACCGTGGGGATGCTTCCTAGACGGCAAGGCGGCGACAGCAACGTCGTAAGAGTTGGCGGTTTCATCTTGCCTTGTCCTTCTCCCACGGGTACTAACCGGTCGTCGCCGTTCCCTGACTTTTCTTCTCATCTCGTAGACTTCTGATCTGCTTGAAGACCTTTCAGAGACTTTGTTCCGGATCTTCTCATCATTCTTGATCTAATCAAAAAGTGACRGCTGAGTTTTTTTC…	503	2	AT4G27652.1			similar to unknown protein [Arabidopsis thaliana] (TAIR:AT4G27657.1)	74.29	70	16	1	108	311	1	70	1e-23	105
All.Contig_1104	GATACAAAAAAAGTTTAGTTTTCTGTTCAGATTCCTAGAAAAATGTCGGCTCTTGCAGATTTAATCAATCTCGATCTCTCCGACTCCTCTGAGAAGATCATTGCCGAGTACATATGGATTGGTGGATCAGGCTTGGATATGAGAAGCAAAGCAAGGACTTTGCCGGGACCAGTGAAGGATCCATCGGAGTTACCGAAATGGAACTATGACGGTTCAAGCACCGGCCAAGCCCCCGGCGATGACAGTGAAGTCATCATCTACCCTCAAGCTATCTTCAAAGATCCATTCAGAAGAGGCAACAACATCCTTGTGATGTGTGACGCTTATACACCGGCTGGCGAACCGATCCCAACCAACAAAAGGCATGCGGCGGCCAAGATCTTTAGCGACCCAACCGTT…	783	5	AT5G16570.1	GLN1;4 (Glutamine synthetase 1;4); glutamate-ammonia ligase	Encodes a cytosolic glutamine synthetase, the enzyme has high affinity with substrate ammonium	Identical to Glutamine synthetase cytosolic isozyme 1-4 (GLN1-4) [Arabidopsis Thaliana] (GB:Q9FMD9); similar to ATGSR1 (Arabidopsis thaliana glutamine synthase clone R1), glutamate-ammonia ligase [Arabidopsis thaliana] (TAIR:AT5G37600.1); similar to ATGS	95.38	238	11	0	43	756	1	238	1e-123	435
All.Contig_1105	CGATTAATCCGATGGTTGAGAAGTCACTGGCGGAGGTAAAACTGACAGAAGCAGGGAAAATCAGGGCAGGAAGTTACAGTGGAGGAATGAAACGCCGACTCAGTGTTGCTGTTTCACTCATTGGTGATCCCAAGCTTGTCTTCCTAGACGAGCCGACTACAGGCATGGACCCGATCACAAGGAGACACGTGTGGGATATCATACAGGAAACCAAGAAGGGTCGCGCCATTATACTAACGACACATTCGATGGAGGAAGCTGATATTTTAAGTGATCGAATAGGGATAATGGCCAAGGGTAGGCTCCGCTGCATTGGAACCTCCATCAGGTTGAAATCCCGCTTCGGCACAGGCTTCATTGCTAACATCAGCTTCACTGAAAGCAACAACCAAGAAAACA…	856	2	AT3G47730.1	ATATH1 (ABC2 homolog 1); ATPase, coupled to transmembrane movement of substances	member of ATH subfamily	Identical to ABC2 homolog 1 (ATH1) [Arabidopsis Thaliana] (GB:Q84K47;GB:Q9STU0); similar to ATATH15 (ABC2 homolog 15), ATPase, coupled to transmembrane movement of substances [Arabidopsis thaliana] (TAIR:AT5G61690.1); similar to ATATH11 (ABC2 homolog 11),	91.2	284	25	1	3	854	641	919	3e-139	491
All.Contig_1106	CCCGTGGGCACAAGAACATTAGGCCGGCTATCCCTGAAGATTGTCCAGCAGTTATGAAAGCTCTGATTGAGCAGKGTTGGTCGGTTGCACCGGACAAGAGACCGGAGTKCTGGCAGATRGKGAAARTACTTGAACAGTTTAGGGTTTCACTGSAACGTGARGGGAGCTTGAATCTGACGTCAAACAAGATCTGCAAGGATCCAAGAAASAGTCTGAAACATTGGATTAASAAGCTTGGACCGCAMGGAGGAGGAACAGCAGGAGGAGGTGCAGGAGGCAGCAGCAGCAGCGGCGGCCTTGGTCGCTCTGCCATGCCTAACCCTAAATTCGCTTGAGAGATTTGAAGTCTCTCTTCTGTATATTATATATRAAGATACCAAAAAGGGTTCTGTGTTGTGT…	512	2	AT5G58950.1	protein kinase family protein		similar to protein kinase family protein [Arabidopsis thaliana] (TAIR:AT3G46930.1); similar to flag-tagged protein kinase domain of putative mitogen-activated protein kinase kinase kinase [synthetic construct] (GB:ABK06446.1); contains InterPro domain Pro	77.63	76	17	0	9	236	423	498	2e-30	128
All.Contig_1107	GTGATCGGTGGGCCTCACGGTGATGCTGGACTCACCGGGAGGAAGATCATTATTGATACTTACGGTGGTTGGGGTGCTCACGGTGGTGGTGCTTTCTCAGGGAAGGATCCAACCAAGGTTGACAGAAGCGGTGCTTACATCGTCAGGCAAGCTGCGAAGAGTGTGGTGGCTGCTGGACTCGCGCGCCGCTGTATTGTCCAGGTGTCGTACGCCATTGGTGTCCCTGAGCCTCTCTCGGTGTTTGTYGACACGTACAAGACCGGGACTATTCCGGATAAGGATATCCTTGTGTTGATCAAGGAGGCCTTTGACTTTAGGCCAGGGATGATGGCTATTAACCTTGATTTGAAGAGAGGAGGTAACTTCAGGTTCCAGAAGACTGCTGCTTATGGGCATTTT…	777	3	AT2G36880.2	MAT3 (METHIONINE ADENOSYLTRANSFERASE 3)		similar to MAT2/SAM-2 (S-adenosylmethionine synthetase 2), methionine adenosyltransferase [Arabidopsis thaliana] (TAIR:AT4G01850.1); similar to MTO3 (S-adenosylmethionine synthase 3), methionine adenosyltransferase [Arabidopsis thaliana] (TAIR:AT3G17390.1	100	152	0	0	1	456	239	390	2e-75	278
All.Contig_1108	GGGATCGGATTCGATTCGTAAATCGAGCGGAAGCCAATGGAAGACGACCCTTTCCTCCGGAAGTTCCAGCCATCGGAACTSAACGAWCRCTKTCKSASWWCTTSACAAGTCTCTCCTTCTTCTCTATCATCTCAACAAAGCATGGCCCTTTACCTCTTCTCTCTCACCCTCCTCTTCTCTCTCGCCCTCCTCRCYACSCCCACCCTTTCCCTYTWCGAACCCGACCCGGATTCGGATTCGATCTCCTCCACCGTCTACGAGCTCCTCCCCAAGTACGGCCTCCCGAGCGGTCTCCTACCCGACTCCGTCACCAACTTCACCCTCTCCGACGACGGCCGCTTCGTCGTCTACCTATCCAAGCCCTGCACCATAGAGTTCGACTACCTCGTCTACTACGAG…	818	2	AT5G19860.1			similar to unknown protein [Arabidopsis thaliana] (TAIR:AT1G55265.1); similar to unnamed protein product [Vitis vinifera] (GB:CAO23444.1); contains InterPro domain Protein of unknown function DUF538 (InterPro:IPR007493)	86.36	110	15	0	250	579	35	144	5e-53	201
All.Contig_1109	GACCACAATAAACAGTAAACAAAGCAAAATGAAGTCTGTTTACATTTTCATAGCGTTGTTCATCTTCTTCCTCGCCGTTCTTGGTGAGTCGCCGGAGAAGATAGGAGCCGACGAGAAGTTCAAATGCCTGGAGGAATACGGCGGGGACGTAGGTCCCACGTTCTGTAACCCTAAGTTCTTCCCCACGTTGTGTCGTCAAAACTGCAGGAGTTTCAAAGGTGCTAAAGGCGGTAAATGCGTGAAGAAACACAAAAGCAAACCTATCAAGTGTTTCTGCGACTACTGCAAAGACGATTAGATATATTTCAAGAAATCATACACCGCTTATTATTATTGTTTAAAACGCTAAACGCCAACCGCCCAACTTGCTATTGCAAGCAAAAGACACCTTTCCCCTAA…	521	3	AT2G43550.1	trypsin inhibitor, putative	Encodes a defensin-like (DEFL) family protein.	Identical to Putative trypsin inhibitor At2g43550 precursor [Arabidopsis Thaliana] (GB:O22869); similar to trypsin inhibitor, putative [Arabidopsis thaliana] (TAIR:AT2G43535.1); similar to putative trypsin inhibitor I6 [Arabidopsis lyrata subsp. petraea]	77.32	97	21	2	8	295	8	103	1e-24	109
All.Contig_111	AAAGAACTGCTAACTAGGCATAAGTCTACTGTTGCTGAGTTTCTCATCAAGAATGAAGACTGGTTTTTCGCGGACTACAACTCAAAGCTTCTTGAATCAAGTAACTATATAACCAGACGGCAAGCTATTAAGTTGCTGGGTGATATATTACTGGATCGATCAAACTCAGCTGTGATGACGAGATATGTGAGCTCAAGGGATAACTTGAGGATTCTCATGAATCTTCTTAGGGAGTCAAGCAAGAGCATCCAGATAGAAGCGTTTCATGTTTTCAAGCTGTTTGCAGCGAACCAAAACAAGCCTGCTGATATAATCAACATTCTGGTGGCAAACAAAAGCAAGCTTCTAAGATTGTTGGCTGATTTGAAACCAGACAAAGAGGACGAGAGGTTTGAAGCA…	584	2	AT5G47540.1	Mo25 family protein		Identical to Putative MO25-like protein At5g47540 [Arabidopsis Thaliana] (GB:Q9FGK3); similar to Mo25 family protein [Arabidopsis thaliana] (TAIR:AT4G17270.1); similar to MO25 protein -related [Brassica oleracea] (GB:ABD64974.1); contains InterPro domain	96.69	151	5	0	1	453	193	343	5e-77	283
All.Contig_1110	GGGGTGATGAATGATAATAAAGCTTTTGTGCTTTAATGGAAGGACCTTGACACACACCTCTCTCTCTCTCTCGTTGCTGTTCGTCTTCTCTACTAGTATATGTCTCTAATCGATCGTCTTCTTCTTCGTGAGTTTCGTAGTTGAAATAACAAACTAAGTATCCTCCAAATGTTATCAGAAGAGGAGCTACAGAGCAATGTCTCTTTAGCTAGTTCATCACCTACTAACAACTGCATCTCTAAAGGAGGAGGACTGAAAGTGCATAACTACTTTGGTCTCTCTGATTCCTCCTCTGTTGAGAGCTCAACTCTATCTTGTGGTCTACCTGGACCACAGTCTCATGCTAGAGAGACAAAGCTTGATGAGAAGCCATTCTTTCCTTTGCTTCCTTCTAAAGAT…	1372	3	AT5G65670.2	IAA9 (indoleacetic acid-induced protein 9); transcription factor	auxin (indole-3-acetic acid) induced gene	Identical to Auxin-responsive protein IAA9 (IAA9) [Arabidopsis Thaliana] (GB:Q38827;GB:Q8LBP2;GB:Q9FLH4); similar to IAA8 (indoleacetic acid-induced protein 8) [Arabidopsis thaliana] (TAIR:AT2G22670.3); similar to IAA8 (indoleacetic acid-induced protein	67.91	321	60	5	169	1002	1	321	1e-93	340
All.Contig_1111	GGATSACTCTCTACAACATTTGTGGAATAATTAACAATTAACTCTACGATCTTGAAACTATTAGGGTTGATACCATGGGGTTACTAGATCATCTTTGGGATGATACCGTCGCTGGTCCTCTGCCAGAGAACGGCCTTGGCAAGCTTCGGAAACACCATACTTTCAGTTTCCGGCCAAGCTCCGCCAATGATCAATCGGAGGTGAGGTCGTACGGCGGAGATTCACCGGAAGAGGCAGTGAAAGTAACACGAAGCATCATGATAATAAAACCACCAGGTTACCAAAGCGGTTCCGCTCCGGTGTCGCCGGCCGGTTCAACTACACCGGTATCCCCCAGTCCTTTCTCTGAGCAAACGCAGGAGGAAAGGAACCCTTTCGGTTTAGGAGAAGGTCGGCATC…	754	3	AT1G56220.3	dormancy/auxin associated family protein		similar to dormancy/auxin associated protein-related [Arabidopsis thaliana] (TAIR:AT1G54070.1); similar to unnamed protein product [Vitis vinifera] (GB:CAO17488.1); contains InterPro domain Dormancyauxin associated (InterPro:IPR008406)	78.26	46	9	1	332	466	95	140	3e-45	43.9
All.Contig_1112	AAGCACCGGCATCTACGCAAAGAGGCCATTACGTGCCGGTAAGCAGAGGTATCAACTGCAGAGTCACCATTACGGGCGGGGATACAAAAAAAGTTTARTTTTCTGTTCMSATTCCTASAAAAATGTCSGCTCTTGCASATTTAAWCAATCTCGATCTCTCCGACTCCTCTGAKAASATCATTGCCGAGTACATATGGATTGGTGRATCAKKCTTGGATATGAGAAGCAAAGCAAGGACTTTGCCGGGACCARTGAAGGATCCATCGKAGTTACCGAAATGGAACTATGACGGTTCAWGCACCGGCCAAGCCCCCRGCRATGACMGTGAAKTCATCMTCTACCCTCMAGCTATCTTCAAAGATCCATTCASAAGAGGCWACAACATCCTTGTGATGTGTG…	756	2	AT5G16570.1	GLN1;4 (Glutamine synthetase 1;4); glutamate-ammonia ligase	Encodes a cytosolic glutamine synthetase, the enzyme has high affinity with substrate ammonium	Identical to Glutamine synthetase cytosolic isozyme 1-4 (GLN1-4) [Arabidopsis Thaliana] (GB:Q9FMD9); similar to ATGSR1 (Arabidopsis thaliana glutamine synthase clone R1), glutamate-ammonia ligase [Arabidopsis thaliana] (TAIR:AT5G37600.1); similar to ATGS	68.85	183	57	0	177	725	19	201	6e-69	257
All.Contig_1113	GAATTAAAGTCCAAACACCAATCTCGACCCCATAGAAAAAATATCCAATCCCCAATCSCCAAACCTAAAAATCTTTTCTTCTCTCTTCTTCTTCTTTATCTTCTTTTCACTTTTTTTKTGGTTTCATCTCTTCATTGTTCTTCACCATGTCCAATGAAACCAAAGATTTCTACAACTACCAATTCCCTTCATCCTTCTCTTTGTATGATATGATGAATCTCCCCACTTCAGCTCCGTCTTCTTATGGAAACAACGGTTTCGATCTATCTTCCTACTCCTTCACTGATTGCCTCCAGAGCTCTCCAGGAGCGTACGACTCTCTACTGCAGAAAACTTTTGGTCTTTCTCCTTCTTCTTCAGAGGTTTTCAACTCTTCGATCGACCAAGAATCAAAACGAG…	735	2	AT4G18170.1	WRKY28 (WRKY DNA-binding protein 28); transcription factor	member of WRKY Transcription Factor; Group II-c	Identical to Probable WRKY transcription factor 28 (WRKY28) [Arabidopsis Thaliana] (GB:Q8VWJ2;GB:O49720); similar to WRKY8 (WRKY DNA-binding protein 8), transcription factor [Arabidopsis thaliana] (TAIR:AT5G46350.1); similar to hypothetical protein [Viti	80.1	206	31	5	147	734	1	202	1e-85	312
All.Contig_1114	GACCTTCACTCTCTACCTTCCKGACGTGACTCCTCTCTCTCTCTCTCCCTCCATCAATGGCCACCACAAACTCTCTCCAACACCACCACCACTCCTCCTCTTCTTACCACCGTCACAATCTCCATCCCCAGTCTCACGTCGTACCATCTTCTCTCTCCCTCAAACACCCCTCCTCCACCGCCACATTCTCCTCACTCATCTGCTCCTCCTCCTCCTCCTCCGTCTTCTCCGCCGCTCTCACCACAAACGCCTCCTCCGTAACCGCAGAAACCKCCACCGAGTWCGACGTCCTAGCGACCCACCTCACCAACCAAGACTTCCGAAAAGCAGACGAAGAAACCCGTCGCCTTCTCATCCAGATAGCCGGAGAAGCCGCCGTGAAACGCGGCTACGTCTTCT…	917	3	AT3G59400.1	GUN4 (Genomes uncoupled 4)	GUN, genomes uncoupled, is necessary for coupling the expression of some nuclear genes to the functional state of the chloroplast. Binds to the magnesium chelatase complex and promotes formation of the substrate,a tetrapyrrole signaling molecule. Porphy	Identical to Tetrapyrrole-binding protein, chloroplast precursor (GUN4) [Arabidopsis Thaliana] (GB:Q9LX31;GB:Q8VZR4); similar to unnamed protein product [Vitis vinifera] (GB:CAO64790.1); similar to hypothetical protein [Vitis vinifera] (GB:CAN76796.1); c	70.34	236	63	2	129	815	27	262	2e-79	292
All.Contig_1115	GGTGGTCTTTACGACAAAGCAGATCACGCTTCTTCCTTCTTCTTCTTCTTCCTATCTTTCCTTGCTTCTAAACTAATACTKSACAGAATTTTTATAATGGCGACTTCTTCGATCACTATACCAACTATTCGGGGCACCAAGTTTCTCGGCCAGACACATCTATTTTCAACTCCAAACCGATCGGTTTTCCCGCCTCCAAAACAGCTCTCAAACGCTCATCAAGTAAAGGCCATGGGTAAGTTCAATCTATGGGAGGTGATGGGAGGAAGGGGACTATGCAACGGAGAGAAAGGTATCGAGAMGGAGCTCCAGAGGAACATAGAGGAAGAGACATCGAAGACTGAGAACCAGACAAAGAAAGAGAGTGACGACAATAGCTTGTCGYTTCAAGTTCCTGAA…	678	2	AT4G23890.1			similar to unnamed protein product [Vitis vinifera] (GB:CAO69542.1); similar to hypothetical protein [Vitis vinifera] (GB:CAN73381.1)	79.61	206	30	5	97	678	1	204	2e-86	315
All.Contig_1116	GACGCAAAAACAAAAAGAAAAGAAAAAATAAATTTCTTGCAATTGAAGGTACCTTTAATCGTGGGCTTCTTCTCTCTTTAGTTTCTTCTCCGTATAATTAAAAAAACCCATTTCCCAACTTTCCTTTGGGTGTTCGTCTGGTGAGGTTTGGTGAACGAGAGAGAGAGAGAGAAGAAGACAACAAGTACGGTCTTTTGCTTCAAATGGGTCGCGAATCTGTGGCTGTGGTGTCTTCGCCGCCGACGGCGACTGCGACTGCGACTGCGAGGGGTACTGCTACTGTTGCGGCGACATCGCTTGCTCCTGGGTTTCGATTTCATCCGACTGATGTAGAACTCGTGAGCTATTACTTGAAGAGAAAGGTTATGGGTAAGCCCGTACGTTTCGATGCGATTGGGG…	1115	2	AT3G10490.2	ANAC051/ANAC052 (Arabidopsis NAC domain containing protein 51, Arabidopsis NAC domain containing protein 52); transcription factor		similar to ANAC050, transcription factor [Arabidopsis thaliana] (TAIR:AT3G10480.1); similar to unknown [Populus trichocarpa] (GB:ABK93555.1); contains InterPro domain No apical meristem (NAM) protein; (InterPro:IPR003441)	93.21	162	11	0	297	782	27	188	5e-128	322
All.Contig_1117	GAGATCTGGAGATAACRACAGAGAGAAGATACTTCAGACAGATCTATGTGCACTTCCYTTCTCTTCAGGCACAACAGGATTACAAAAAGGAGTGATGCTCACACATCGCAACCTCATAGCAAATCTTTGCTCTACTCTCTTCAGCGTCCGGTCTGAAATGATCGGCCAGATCGTGACTCTTGGTTTGATTCCGTTCTTTCACATTTACGGTATCGTTGGAATCTGTTGTGCTACGATGAAGAATAAAGGCAAAGTTGTTGCTATGAGTCGGTATGATCTAAGGCTTTTCTTGAATGCTTTGATTACTCATGAGGTCTTGTTTGCGCCTATTGTTCCACCTATTATATTGAATCTTGTCAAGAATCCGATYGTCGATGAGTTTGATCTTTCTAAGCTTAA…	587	2	AT1G62940.1	4-coumarate--CoA ligase family protein / 4-coumaroyl-CoA synthase family protein		Identical to 4-coumarate--CoA ligase-like 1 (4CLL1) [Arabidopsis Thaliana] (GB:Q9LQ12); similar to 4CL2 (4-coumarate:CoA ligase 2), 4-coumarate-CoA ligase [Arabidopsis thaliana] (TAIR:AT3G21240.1); similar to 4-coumarate:CoA ligase-like [Nicotiana sylves	93.33	195	13	0	2	586	169	363	6e-91	329
All.Contig_1118	GACCTCTCTCTCAAAACGCTCTAACTTCTTTCTAAGTTCATCTAAACTAAAGCTGCGTTCAGTGGCCGGCGAGCAATTTTGCCGCCGGTCGCCACCCCTTTTTTTGTTGTTTCGTTTTTGTTGTAATATAAAATCCATGTTTTCGGGTTAGCCGAATCTCTCTTCCGTTGCGGATCTAATAACCTTCGCTATGGCGATGTCTTTTGTTGTGTTTTTTTCTTGTTCTTCATCGAAGCTAATCTTCAATCAATTCTCTTTATCTTCKATGAAGAACTCTCASATAACTTTCCACTTGTTCTTACTGCAATCCCGTAGGCTACTGAACGGGTTTCTTTGTTTCCCGCTCACCTTAATCTCTCCTTCTAAGAGATTCAGTCTTTCTTGTTAAGTAGCCGGTAT…	783	2	no significant hit
All.Contig_1119	GTGTATGACTGGTCTGGATAAAGACAAGGCATCTGTGTTCTTCAAGAACGAGTCGAGCTCTGCTGGCTCCATGACGGATAACTCTGGTATCAGGAAGATACTTCCTCAATCGCAAATCTGCGACTTTGAGTTCGAGCCCTGCGGCTACTCGATGAACAGCGTCGAAGGTGACGCCATCTCCACCATCCATGTGACCCCTGAAGATGGATTCAGCTACGCTAGCTTTGAGGCAGTGGGGTACGATTTCACGACCATGGACTTGAGCCAACTCGTCTCAAGGGYGCTAACTTGCTTCGMGCCGAAGCAATTCTCAGTAGCGGTGCACTCTAGCGTCGCACAGWAGAGCTACGACCACTCTGGTCTCTCTGTGGACCTGGAGGATTACGGATGCAGGGAGAC…	745	2	AT5G15950.2	adenosylmethionine decarboxylase family protein		Identical to S-adenosylmethionine decarboxylase proenzyme 2 (SAMDC2) [Arabidopsis Thaliana] (GB:Q9S7T9); similar to SAMDC (S-ADENOSYLMETHIONINE DECARBOXYLASE) [Arabidopsis thaliana] (TAIR:AT3G02470.3); similar to SAMDC (S-ADENOSYLMETHIONINE DECARBOXYLASE	91.71	181	15	1	2	544	183	362	6e-88	320
All.Contig_112	GACAACCTCCATGTCCCATATATCTTAAGCAGCAAGAGAACTCAAACAGTTTAGTTTTCTTCAAAACTAGTTTGTTTTTGGGTTTTAGTTGGTATCGTCGGAAGAGAGAGAAAATGTTGGGAATTTTCAGCGGAGCTATAGTATCATTGCCGGAAGAGCTGGTGGCTGCCGGGAACCGAACTCCGTCGCCGAAGACAACCGGATCGGTCCTAGTCAACAAGTTCGTAGAGAAAAATCCCTCTGCCGTGTCCGTACAGGTCGGCGACTACGTGCAGCTTGCTTATAGCCACCACAAAGAGAGTCCTCTCCGGCCAAGGTGAGTCGCCCGCTAATTTGTTTGTTTTCATTTCTCGTTGAAATCAGCTCACAATGTTTCGAAAGTTTTTAACGTGGGACGGC…	486	4	AT5G19140.2	auxin/aluminum-responsive protein, putative		similar to unknown protein [Arabidopsis thaliana] (TAIR:AT5G43830.1); similar to aluminum-induced protein [Brassica rapa] (GB:ABV89631.1); contains domain PTHR11772 (PTHR11772); contains domain G3DSA:3.60.20.10 (G3DSA:3.60.20.10); contains domain SSF56235	92.65	68	5	0	114	317	1	68	3e-30	127
All.Contig_1120	GAGAACACAGCACACTTGGAGTTAAAGAAAAAGAGTTCTTCYTTTCGTGTGTCAATTTTCTCTTCTTCCTTTCTCGTGCTTTCCTCACGAGATCTCTCACAAGACTCTCACGTTAAAATAATAGAAAARAAAAAGGTAAAAAAAGAAGGAATCCATAAATGGACATGAGAAGCAACAACCGCCAGCAACAACAGCAACAGGTACTTGATGGGTCGGACATAGTCGAGCTGGTCGAAAACGAAAAAGTCTTCGACAAGTTTGTGGAACTAAAGTTTCAACAGTTGGATCAAGACGAAGATGGTTAGCTCTCCGTGAATGAGCTACAGTCTGCCGTTGCTGATATCTGCGCCGCTCTTGGTTTGCCTGTGCAGGGCACTTCTCCTGACTCCGATCACATCT…	756	2	AT4G38810.2	calcium-binding EF hand family protein		similar to calcium-binding EF hand family protein [Arabidopsis thaliana] (TAIR:AT5G28830.1); similar to unnamed protein product [Vitis vinifera] (GB:CAO47301.1); contains InterPro domain Calcium-binding EF-hand; (InterPro:IPR002048)	81.98	111	20	1	159	491	1	110	6e-38	154
All.Contig_1121	GGATATTKGTTTTTTAGTTTTTCCTCTCTACAAAAYCGTAATTAAAAACCCCACAAYCTCTCCATCTTTCGTTGCATTCACGTTTCAACAGGCTCCCTTCTATATCGCCCATTTAATAGCTTTGAACCAGTTTCTCAAGTACAAAAACGTCGATGGCCGTTGAAGCTCACCATTTAAATCATCTATATTCCTCTAATAACAGAGAAAGGATGAATCCCGTTGAAGCCAACGGTTTAGTCTATAACACCCAAATGAGATATAACACTGTTCAAGCGACGACCATGCCGTTTAACCACGCCATGGAATGTCAAACTTCTCTGTTGAATCCAGTTTACAACCTCTCACCGTTTGATTGCCTGGCTCAACAGTCCATGAAACCGATGATCCATTCTGTTGAGA…	618	3	AT3G12920.1	protein binding / zinc ion binding		similar to protein binding / zinc ion binding [Arabidopsis thaliana] (TAIR:AT1G79110.2); similar to unknown [Populus trichocarpa x Populus deltoides] (GB:ABK96244.1); contains InterPro domain Zinc finger, RING-type; (InterPro:IPR001841); contains InterPro	65.82	158	51	5	153	617	1	148	5e-47	184
All.Contig_1122	GGAGCATCATCATCCTCCTCGTCATCATCGCTTTTAAAACCCCCTCAAAAATCTCTGAACACCTTCTCTCTAAAGCAATCATCACTCAAAATAAATCCTCTCTCTGTCTCTGTATCTCTGTAATCTTCTGATTCGATATGGGTTTTAGCAAAGAAGAGATCAGCAAAAGCAGAAGGTTCTGGCCTTCTCTATGGAGAGGGATCAAAACTGTATTCGTTTTGTTCACAATGTTCCTCTCTTTTCTCCTCGTCTCTGCTCCCATCTTCCTCGCCGTTGCAGACGCTCTCCTCCCTTCCGCCCTCCTCCACCGCCTCTCTGCGCCGGCGAACCTCTCTTCTCATCTCACCAACTACGATTTCCGCCACTCCCTCATCGATATTCCACTGATCTCCATCGTTA…	1161	2	AT2G40095.1			similar to unknown protein [Arabidopsis thaliana] (TAIR:AT3G55880.2); similar to unnamed protein product [Vitis vinifera] (GB:CAO41350.1); contains domain PTHR10992 (PTHR10992); contains domain PTHR10992:SF2 (PTHR10992:SF2)	89.95	209	20	1	138	761	1	209	5e-103	371
All.Contig_1123	GAGATCAGAAATAAATGATCACACTGCAAGCACGTCGGTCCATAATGTCTTTTGTGCACAAGACCAGCGCCATGGATACTTATTCTCCTACAACAACGTCATATCAACATACCAATATGGAATTCAACTATGGTAACTACTCTACGCCTGTGGCTCCGGTGACTACTGCTGCGACCACTGCATATTATCCGGTACATATGACCGTTGATGATCGAACTGGTGAAAACTATTGGGGCATGGATGATATCTGGTCATCGATGCATTTACTCTATGGTAATTGATTAACAACGATCGCTCGGAAAACAAGATATGGAATATTACTTTGAGATTTGTGATTTTTACTACTGTGATTAGTACGTGACATGTATATGGTTTTWGCCTCGACGTTTCAGAGGTTTG…	549	2	AT3G27810.1	ATMYB21 (MYB DOMAIN PROTEIN 21); DNA binding / transcription factor	Encodes a member of the R2R3-MYB transcription factor gene family. Induced by jasmonate. Involved in jasmonate response during stamen development.	Identical to Transcription factor MYB21 (MYB21) [Arabidopsis Thaliana] (GB:Q9LK95;GB:O22684;GB:Q9SBG4); similar to MYB24 (myb domain protein 24), DNA binding / transcription factor [Arabidopsis thaliana] (TAIR:AT5G40350.1); similar to MYB transcription f	65.79	76	26	1	51	278	156	226	7e-22	100
All.Contig_1124	CACAAGCAGTGTGCAACAAAATCAAGAAGAAGACTAAAAGAATGGCCAAAGTCCTCTCGCCGCTTCCGGCTGCCGAAGGGGAGCCTTTGCCACCGACCATAAACTCTCAAGTCTCTGGCCTCACTACCGTCGAGCTCAACGTCAACATGCATTGTCAAGCTTGTGCTGACCAGCTCAAGAAGAAGATTCTAAAAATGAAAGGGGTCCAAACCACTATGACAGAGTACACGACCGGGAAAGTAATAGTGACCGGGACAATGGACGAAGAGAAACTTGTTGATTACGTCTACCGTCGGACCAAAAAGCAGGCCCGAATCGTACCCCAACCCGACCCGGAACCTGAAAAGTCTGCGGCCGAGGAAGACAAGAAGGAGGAGAGCGGTGAAGGACCTGAGAAAC…	885	5	no significant hit
All.Contig_1125	CATCCCTTTCGTCTTGATCTGGCCTCTGCACGTTTACCACCAGAAGCATCCTGTTAACCTCATCCTCCTTGCCCTCTTCACTATCTCCTTGAGCTTCACCGTTGGTGTCAGCTGTGCTATGACAGAAGGAAGAATCGTCCTTGAAGCCTTGATATTGACACTGTCCGTGGTCGGATCTCTAACCGCATACACTTTCTGGGCTGCAAAGAAAGGAAAAGACTTCAGCTTCCTTGGACCCATTCTCTTCACCAGCCTCATCATTCTTGTAGTGACCAGCTTCATGCAGATGTTCTTCCCGCTTGGCCCGACCTCTGTTGCAATATATGGAGGAGTCAGCGCGCTGGTGTTCTGCGGATACATAGTCTATGATACCGACAATCTCATCAAGCGTTTCACATA…	636	2	AT4G15470.1			Identical to Protein FBL4 (FBL4) [Arabidopsis Thaliana] (GB:Q94A20;GB:O23399;GB:Q940C4); similar to glutamate binding / [Arabidopsis thaliana] (TAIR:AT1G03070.1); similar to unknown [Populus trichocarpa] (GB:ABK94990.1); contains InterPro domain Protein o	95.09	163	8	0	2	490	94	256	8e-87	316
All.Contig_1126	GGAGAGTTTAAGTTTGGTGTTAAACATGGACTTGGATCTTACCATTTCAGGAATGGTGATAAGTATGCAGGGGAGTATTATGGAGACAAGATTCATGGGTTTGGTGTTTACCATTTCGCTAATGGTCATTATTACGAAGGAGCTTGGCATGAAGGTCGTAAACAAGGCTATGGTACGTATGGGTTTAAAACCGGAGATGCAAAATGTGGTGAATGGGATGATGGTCATCTCGTTAACCGGCTTCCTCTAGAGACCGGATCGGTTCATAAAGCCGTTCAGAGTGCTCGAGAGATGGCGAGAAGAGGCGTGGAGAGACGGGTGGACGAGCACGTGATGCGAGCTGTAGCTGCGGCTAATAAAGCTGCTACGGCTGCGAGAGTTGCAGCTGTGAAAGCAGTT…	672	2	AT1G77660.1	MORN (Membrane Occupation and Recognition Nexus) repeat-containing protein /phosphatidylinositol-4-phosphate 5-kinase-related		similar to MORN (Membrane Occupation and Recognition Nexus) repeat-containing protein /phosphatidylinositol-4-phosphate 5-kinase-related [Arabidopsis thaliana] (TAIR:AT1G21920.1); similar to unnamed protein product [Vitis vinifera] (GB:CAO61835.1); contai	84.03	144	22	1	1	429	277	420	1e-54	209
All.Contig_1127	GACGGCATTTGCTGGGTCACGGTCCACTACTAAAACCATATCTATTTTCTTCCTGTACACTTCACTTAGCCTCGTCGCTCTCGGCCTAGGCGTCTTAAACCCATCTCTTCAAGCATTTGGTGCTGACCAGCTTGACCACGACCTTGACCATGACCATGAACAAGACCATGAACAAGACCAAGAGCCATCCTCAGAGAACAAAGAAGTCAAATCGGACCGCAAGTCTCAGTTTTTCCAATGGTGGTACTTTGGTGTCTGCGCCGGTAGTCTTCTAGGAGTCACCGTCATGTCTTATATCCAAGACACATTTGGTTGGGTTCTCGGTTTTGCAATCCCAACCGGTTCCATGTTACTATTGATCTTCTTGTTCCTATGTGGCTGCGGAGTTTATGTCTATGC…	1444	3	AT5G14940.1	proton-dependent oligopeptide transport (POT) family protein		similar to proton-dependent oligopeptide transport (POT) family protein [Arabidopsis thaliana] (TAIR:AT3G01350.1); similar to Os06g0239500 [Oryza sativa (japonica cultivar-group)] (GB:NP_001057261.1); similar to TGF-beta receptor, type I/II extracellular	84.24	425	65	6	2	1270	99	512	2e-157	552
All.Contig_1128	GATAGAATGTTTTCTTTTGACAAAAATTTCTTTATAGAGTGTTTCGATTTATAAACCTTTTAAACGCTGCCTTTGCATTTKACACACCAACAACGCGCTTCACTCGTATTTTCTTCTCTCCCAAAGTTTCTCCCTTTTCGATTCCGAAAGATGAGTGAAGAGCAGCAGCGACCTGCGCCTCGTCTTAACGAGAGGATCCTCTCTTCCTTGTCCCGACGATCCGTTGCTGCTCATCCTTGGCATGATCTTGAGATTGGCCCTGGAGCTCCCCAGATTTTCAATGTTGTGGTTGAGATYACAAAGGGAAGCAAAGTCAAATATGAACTTGACAAAAAGACTGGACTCATCAAGGTGGATCGTATTCTCTACTCATCAGTCGTTTACCCTCACAACTATGGT…	803	2	AT1G01050.1	ATPPA1 (ARABIDOPSIS THALIANA PYROPHOSPHORYLASE 1); inorganic diphosphatase/ pyrophosphatase	Encodes a soluble protein with inorganic pyrophosphatase activity that is highly specific for Mg-inorganic pyrophosphate.	similar to ATPPA3 (ARABIDOPSIS THALIANA PYROPHOSPHORYLASE 3), inorganic diphosphatase/ pyrophosphatase [Arabidopsis thaliana] (TAIR:AT2G46860.1); similar to unknown [Populus trichocarpa] (GB:ABK94595.1); contains InterPro domain Inorganic pyrophosphatase;	89.37	207	22	0	148	768	6	212	1e-102	369
All.Contig_1129	GAGGAACGGATGAAGTGGAGAAATCACCCATTTCCTCTTATGAAAACAGCACTCAGACCGCCAAAAACGTAGCTTCTCAGGATCCTGTCTCCAAAGTGGTGATTTCTGAAGAGAGTGAGCATGCTGAGACCTCGAATTTGGTCAAACACAAGTCTGGTGCTGGTGAAAATGGTAAGGTGGCTACTCTTCCAGGGYCTGCTTCTGGAACTAGCAAAATGGTAGAGAGTGTAAGAGAATCTGAAGTTCCATCATCCCCTGAGGAAAAGCGTCTTTTGTTGCCTGGTCCACCAGCCGTCCGTACTTCGTGGTTGAGTTGCTGCGGTTTGTTTGATGCGATGACAGGATCTGACAGATAAGCACAGTGTGCTGCAGACCAGCAGGAGTGAGATGAAGGTGGAC…	559	2	AT1G29530.1			similar to unknown protein [Arabidopsis thaliana] (TAIR:AT2G34310.1); similar to unknown protein [Arabidopsis thaliana] (TAIR:AT2G34310.2); similar to unknown protein [Arabidopsis thaliana] (TAIR:AT2G34310.3)	54.11	146	36	4	3	347	89	234	2e-17	85.1
All.Contig_113	GACAACCTCCATGTCCCATATATCTTAAGCAGCAAGAGAACTCAAACAGTTTAGTTTTCTTCAAAACTAGTTTGTTTTTGGGTTTTAGTTGGTATCGTCGGAAGAGAGAGAAAATGTTGGGAATTTTCAGCGGAGCTATAGTATCATTGCCGGAAGAGCTGGTGGCTGCCGGGAACCGAACTCCGTCGCCGAAGACAACCGGATCGGTCCTAGTCAACAAGTTCGTAGAGAAAAATCCCTCTGCCGTGTCCGTACAGGTCGGCGACTACGTGCAGCTTGCTTATAGCCACCACAAAGAGAGTCCTCTCCGGCCAAGGTCATTTGGGGCTAAGGATGAGATATTCTGCTTGTTCCAAGGCTCACTTGACAACCTAGGAAGCCTTAAACAACAATATGGGC…	961	15	AT5G19140.1	auxin/aluminum-responsive protein, putative		similar to unknown protein [Arabidopsis thaliana] (TAIR:AT5G43830.1); similar to aluminum-induced protein [Brassica rapa] (GB:ABV89631.1); contains domain PTHR11772 (PTHR11772); contains domain G3DSA:3.60.20.10 (G3DSA:3.60.20.10); contains domain SSF56235	93.99	233	14	0	114	812	1	233	8e-125	443
All.Contig_1130	GACTCTCGCGTAGTAGCTAAAGTGAAAGTCAACGCAGCCACCAAGTCTCTTGAAAAATGGCGTCACACGACCATGATCATCACCATCACGACCACGAGCAAGGCCACAAGAAACCAGAAGGCGGCGGTGGTGACACGTCATGGGTAGGACCGGACRGGAGGGTGTACCATAGCCACGATGGACTCGCACCGCACTCACACGAACCCATCTACTCTCCTGGMTACTTCAGCCGCCGAGCTCCTCCYCTTAACGACCGTAACTTCTCCGAGAGAGCTTTCACCGTCGGTATTGGCGGTCCTGTTGGCACMGGGAAAACAGCATTGATGCTTGCTCTTTGTAGAGTCTTGAGRGACAAGTACAGTCTTGCYGCTGTGACAAATGATATATTCACMAAAGAGG…	801	2	AT2G34470.1	UREG (urease accessory protein G); metal ion binding / nucleotide binding	Encodes a urease accessory protein which is essential for the activation of plant urease.	similar to urease accessory protein G [Solanum tuberosum] (GB:CAC33001.1); contains InterPro domain Urease accessory protein UreG; (InterPro:IPR004400); contains InterPro domain [NiFe]-hydrogenase/urease maturation factor, Ni(2+)-binding GTPase; (InterPro	92.71	247	18	0	57	797	1	247	2e-124	441
All.Contig_1131	GAATTCTAAGGTCAAATTGCTTGCGACACGGAGAATATTTTTCTCCGGCGGCTGCGATGTCGACGATTTCAATCCATCGGACAGAGCTGCTTAGAATCACGCACAATCGCTCGCGAATTTCTCGGCAGCGATATAGGAGAACTATTCCTCCATGGCGAATGATGATCAATTCGAGATCTTCTGATACGACTAAGAAGGATGAACTCTCTGTTAAGATTCCTCAAGTTGATCAATTAAGGTCTGAGGGTTTGAGATTCGACCGTTTGCAGCCTCCCGAGCATGAGCTTTTCCAGCAAGATCGATTGGATTTTGGTAAATTCGTAGCACGAGAAGCCATTCTTGATGAAGAATACTGGACAGCAGCGTGGCTACGTGCAGAGAGTCACTGGGAAGATCGTG…	536	3	AT2G06025.1	GCN5-related N-acetyltransferase (GNAT) family protein		similar to GCN5-related N-acetyltransferase (GNAT) family protein [Arabidopsis thaliana] (TAIR:AT4G28030.1); similar to unnamed protein product [Vitis vinifera] (GB:CAO65252.1); contains InterPro domain Acyl-CoA N-acyltransferase (InterPro:IPR016181); con	84.05	163	23	1	57	536	1	163	3e-69	257
All.Contig_1132	CTCGAGAAGAAGTACCTGGGAGACGCGGATATCCGGGTTATATGTACACAGATCTTGCAACTATCTATGAGCGTGCAGGGCGTATTGAAGGAAGAAAGGGTTCCATTACCCAAATCCCTATCCTCACTATGCCCAATGATGACATCACTCACCCTACTCCGGATCTTACTGGTTATATTACTGAGGGTCAGATATACATTGACAGGCAACTTCACAACAGACAGATATATCCACCCATCAACGTGCTTCCATCACTTTCTCGATTAATGAAGAGCGCTATTGGTGAGGGAATGACTCGCCGTGACCATTCTGAYGTGTCCAACCAGCTATACGCAAACTATGCAATCGGGAAGGATGTTCAAGCCATGAAAGCTGTAGTTGGAGAAGAAGCTCTTTCTT…	830	3	AT1G20260.1	(VACUOLAR ATP SYNTHASE SUBUNIT B3); hydrogen ion transmembrane transporter/ hydrogen ion transporting ATP synthase, rotational mechanism / hydrogen ion transporting ATPase, rotational mechanism		similar to (VACUOLAR ATP SYNTHASE SUBUNIT B1), hydrogen ion transporting ATP synthase, rotational mechanism [Arabidopsis thaliana] (TAIR:AT1G76030.1); similar to unknown [Populus trichocarpa] (GB:ABK94104.1); contains InterPro domain ATPase, F1/V1/A1 comp	99.49	197	1	0	3	593	291	487	6e-111	397
All.Contig_1133	GGAGGTGTGTGTTTGCCCCACTCCTCGCATAATAAAACAATCTTCAAACGTTTCACAATTSACATCTCTCTTTTCGAATTTCCGGATACATACACACAAACGTYATGTAACTGCAAAAATACATCAAAACGAGATTCCACTATTAGCTATGTACTAGTCAAAGAGCGTCATGGTGATGGTGTGACCCCAAAATGATGAAAGTGAGGAAATGGGAGAAGAAGAATTGAAGAACACAAGATGTGTCTTCTTCTTCTAAGGCATTAAGAACATCAACAAGGAGAGAAACCATTATAGATTTATATATATAGAGAGAGAGATAGAGAAGAAAGAGAGTTATAAAATTATTTTTCCTTTTTTTTTTGCAATAATCCATTGAGCGAATAATGCCAGTCCCCCTTG…	755	3	AT1G32540.3	LOL1 (LSD ONE LIKE 1)	Encodes a protein with 3 plant-specific zinc finger domains that acts as a positive regulator of cell death.	similar to LSD1 (LESION SIMULATING DISEASE) [Arabidopsis thaliana] (TAIR:AT4G20380.5); similar to LSD1 (LESION SIMULATING DISEASE) [Arabidopsis thaliana] (TAIR:AT4G20380.6); similar to LSD1 (LESION SIMULATING DISEASE) [Arabidopsis thaliana] (TAIR:AT4G2038	95.88	97	4	0	462	752	26	122	2e-40	162
All.Contig_1134	GAAAACATAAACATTTGCGAAGAAGAAGAAGAAGAAGTAAAGAAGAGTCTTTTTGATCGGAGGAGCCTCGGAGAAATCGAAAGAAAGTCGCAATGAGTGAAGAAGGTCCCAAGCTTTTCACTAACAAACCCAAGAAGAAGGATATCATCGCCCAGCTGAAACACGTCGAAGCAAATGGAACCACCGTTGTTCCTCCATCGAATCCCGCTGCAGCGGCGGCGGCTTCGTAYACGATGGGCGGTGGTGCTCCTMCWCCWCCTCCGSCTCCSAAGGAATCRTTCGCTCGAAGGTACAAATAYATGTGGCCGCTYCTCCTCACCGTCAATCTCGCCGTCGGAGGTTACCTTTTCTTTAGGACTAAGAAGAAGGACATAKAAGAACCTGCAAGTGAAGAGATTG…	733	2	AT1G55160.1			similar to unknown protein [Arabidopsis thaliana] (TAIR:AT2G19530.1); similar to unnamed protein product [Vitis vinifera] (GB:CAO45689.1)	81.48	189	31	4	93	647	1	187	9e-65	243
All.Contig_1135	GAAGGAAGGACAATACTGTAAGAAAGACAGAAAAGGCCAAAGGAAGAAGATAAAAGAAGAAAGAAAGGAGAGACCACACSACACAAAATGTATAAGACAGAGAGAGAGAGAATCATTTGAAGTTGGTAGTCCAATGGCGGCAGCAAAGGCAGGGRTACTCCCGTGGCTTATCCCATCATCCTCGGCGACTTCTTCTCCGCTGTTTTCAGCTGCTGTCAAGYTGYCAGGGGTATGGCGGGTGAAAGGGAGGAAAGCAGAGAAGGATGTATCTGTCTCTGTCGCCTTCAATCCTTCCGGCAATTTCGACATCTCAGCCTTCGACTCTCRCGACGATACAGATAAAGTGGAACCTCCGATGCCTCCAACGAGCGGCAGGTACGAAGTAGTCATAGACAACGA…	678	2	AT2G47910.1	CRR6 (CHLORORESPIRATORY REDUCTION 6)		similar to hypothetical protein [Vitis vinifera] (GB:CAN77780.1); contains InterPro domain Protein of unknown function DUF1817 (InterPro:IPR014946)	74.32	183	43	3	140	676	2	183	7e-71	263
All.Contig_1136	TCATGTTGCTCCCTCGGAGAAACATCCGGAGAGTTTGTTGGAAGGGTTTACAGAAACTCAAGTTAGCACTCTTGCAGTAAAAGAAAGGCTGCTAGTTGCTGGTGGGTTTCAAGGAGAGCTTATTTGCAAGCATCTTGATAGACCTGGTGTGAGTTTCTGCTCACGTACAACTTACACGGAAAACGCTATCACCAACGCAGTAGATATATACAGAAACTCCAGCGGCGCTCTTCACTTCATGGCCTCAAATAATGACTGTGGAGTCAGAGACTTTGACATGGAGAGATATCAGCTTGTCCAACTCTTCCGTTATCTTTGGCCCGTCAACCATAGCTCCCTAAGTCCTGATGGAAAACTAGTAGCAGTCGTCGGAGATGACCCAAATGGTCTATTGGTAGA…	874	3	AT5G56190.2	WD-40 repeat family protein		similar to WD-40 repeat family protein [Arabidopsis thaliana] (TAIR:AT1G55680.1); similar to WD-40 repeat family protein [Arabidopsis thaliana] (TAIR:AT3G13340.1); similar to unnamed protein product [Vitis vinifera] (GB:CAO66839.1); contains InterPro doma	94.55	275	15	0	2	826	173	447	1e-152	535
All.Contig_1137	GACATSGACGTTTCAGAACGCGCGATTGAGAAGCCGGARGGAAGGCGGCCGCCATGGATCCAGCAGGAGCATCGGTGGCAAACGACATCGGAGGAGAAGGCGAGAAGTTCGCGGTGGGGAATATTTATTCTGTTAAAGTGATTACCGGAGATGAGTTCCGAGGGATCGTAATGGCTTACGATCCAATCCCCAACTTCGTCGTTTTTGAAGAGGGTTCGAAACCTAGAGCTGGGCACTCAAAGAACACTCGGATGGTGAATGCGAGTTTCATAACGGGGCTGTCGTATCTGGGCAAAACCGAAGATCCGCTTCTTACAGACAACTGTTGTGTTAATCTTGACTCGCTCCGAGCTAAAGAGGCACTTGCTATCAGGCAAGCGGAAGCAGAAGCTGRGAGAT…	770	2	AT1G24050.1			similar to unknown protein [Arabidopsis thaliana] (TAIR:AT1G70220.1); similar to unknown [Picea sitchensis] (GB:ABK26986.1); similar to Os02g0741900 [Oryza sativa (japonica cultivar-group)] (GB:NP_001048085.1); contains domain PTHR13542 (PTHR13542)	90	170	17	0	54	563	1	170	8e-83	303
All.Contig_1138	GGTCGCCTCCTTTCTTCTCTCTTCCCATTTCTTCGCTGCAGACAGATCCAAAATGCTTCTCAAAGCTGCCTCTACGTTCTCGCTCATGACCGTTCACGGTGTGAAGAAGGACGTCTCTCCTCTCTCCTCCTCCGTTTCATCGGGGAGAAACCTCTCCTTCTCTGTTCGTGCCTCCACGCAGCCACTAAGCGGCGTCGTTTTCGAGCCGTTCGTGGAGGTGAAGAAGGAGCTCGATCTCGTCCCTTCGAGTCCGCAGCTTTCGCTCGCTCGACATTTGTACTCCCCTGAGTGCGAAGCCGCCGTCAATGAGCAGATCAATGTTGAATACAATGTGTCGTATGTGTATCACGCTTTGTACGCTTACTTCGACCGTGACAACGTTGCTCTGAAAGGTCTTGC…	984	2	AT3G56090.1	ATFER3 (FERRITIN 3); ferric iron binding		Identical to Ferritin-3, chloroplast precursor (FER3) [Arabidopsis Thaliana] (GB:Q9LYN2;GB:Q8WHW6); similar to ATFER4 (FERRITIN 4), ferric iron binding [Arabidopsis thaliana] (TAIR:AT2G40300.1); similar to ferritin [Chorispora bungeana] (GB:ABB22752.1);	79.92	259	37	1	53	784	1	259	8e-99	357
All.Contig_1139	GTATTTGACGAATATACTGTCCACTAAGGTTTACGACGTGGCGATTGAGTCGCCACTCCACTTGGCCAAGAAGCTATCGGAGAGGTTAGGTGTTCGCTTGTTTCTCAAGAGAGAAGACTTGCAACCTGTGTTCTCGTTTAAGCTTCGTGGAGCTTACAACATGATGGTGAAGCTTCCAGCTGAGCAGTTAGCGAAAGGAGTCATCTGCTCCTCAGCTGGAAACCATGCTCAAGGAGTTGCTTTGTCTGCTGCCAAACTCGGCTGCACCGCCGTGATTGTTATGCCTCGTACAACTCCAGAGATCAAGTGGCAATCTGTGGAGAATTTGGGTGCGACGGTTGTTCTCGTTGGTGATTCGTATGATGAAGCACAAGCATTTGCTAAGCAACGAGCTGAAGA…	1198	3	AT3G10050.1	OMR1 (L-O-METHYLTHREONINE RESISTANT 1); L-threonine ammonia-lyase	first enzyme in the biosynthetic pathway of isoleucine	Identical to Threonine dehydratase biosynthetic, chloroplast precursor (OMR1) [Arabidopsis Thaliana] (GB:Q9ZSS6;GB:Q9SPF1); similar to ATSR (ARABIDOPSIS THALIANA SIGNAL-RESPONSIVE), serine racemase [Arabidopsis thaliana] (TAIR:AT4G11640.1); similar to th	91.48	399	34	0	2	1198	95	493	0	668
All.Contig_114	GAACCTCCSATATCCATTGTCCCATATAATCTCAAACAAAGAGAGAACTCAAAGATTCAGCAAGTAGTTATTATCATCGGTGGAAGTAGAAGATGTTGGGAATTTTCAGCGGAGCTATAGTATCGCTACCGGAAGAGCTGGTTGCAGCCGGCAGCCGAACTCCGTCTCCAAAGACAACCGGGGCGACTCTAGTTAACAAGTTCGTCCAGAAAAACCCATCCGCTGTGTCCGTACAAGTCGGTGACTATGTGCAGCTTGCGTACACCCACCACAAAGAGAGTCCTCTCCGGCCAAGGTCATTTGGGGCTAAAGATGAGATATTCTGTTTGTTCCAAGGCTCGCTTGACAACCTAGGAAGCTTGAAGCAGCAATATGGGCTTGCAAAGAATGCAAACGAGG…	839	8	AT5G19140.1	auxin/aluminum-responsive protein, putative		similar to unknown protein [Arabidopsis thaliana] (TAIR:AT5G43830.1); similar to aluminum-induced protein [Brassica rapa] (GB:ABV89631.1); contains domain PTHR11772 (PTHR11772); contains domain G3DSA:3.60.20.10 (G3DSA:3.60.20.10); contains domain SSF56235	94.87	234	12	0	93	794	1	234	6e-127	450
All.Contig_1140	GGACAAAACACACAGAAAGAAACAGYCAGATCTGAAATAAAGAAACAAACAGGATGAGCAACATAATCCCATCGGAGAAACGTTCGATCATCACCTTCGTTTTACTSGCCGGTCTTATCGGAAGCGCTCTACTCTTCACATCCTTCATACGATCAGCCGACGACGCGTTCTTCCTCTGCTCCACCGCAAGCGCCAAAAGCCGAGCGGTGGCCGCAGCAGCTGATTACTCAGCGACACCGATCCAGCTCCAAGCCATCGTCCACTACGCGACCTCCACCATAACCCCACAACAAAACATCCACGAGATCTCAATCTCCTTCAACGTCTTGAAAGAGCTAGCTCCGGCCAACTTCCTCGTCTTCGGTCTGGGCCTCGACTCRCTCATGTGGGCTTCTCTYA…	532	2	AT1G27930.1			similar to unknown protein [Arabidopsis thaliana] (TAIR:AT1G67330.1); similar to unknown [Populus trichocarpa] (GB:ABK93495.1); contains InterPro domain Protein of unknown function DUF579, plant (InterPro:IPR006514)	83.65	159	26	0	54	530	1	159	3e-61	230
All.Contig_1141	GAGCCCGAGTTTCCACGGATCAACCTCGCTTTCTTCATCAGCAAGTAGTAATCAAGGTCAAGCTGTTCAGTCCATGAGATCAAGACGCACACCAACTTGGGCTAAACCTCGAGGCTCAGATGATGGATACTCAAGTGATTCGGTGTTGAGACATGCGTCTAGCGATTTCAGAAAGATGGGACAGCGAATATTTGTGTTTATTGTTGGTGGAGCGACAAGATCAGAGTTAAAAGTATGTCACAAACTAACCACGAAACTCAAAAGAGAAGTAATCCTCGGGTCCACAAGCCTCGATGATCCTCCACAGTTCATAACGAAACTGAAGCTCCTGTCTGCAAATGAGCTATCCATAGACGATCTCCAGATATGAGAATCAAGATCTCAAGTCAAACAAATCCT…	619	2	AT1G12360.1	KEU (KEULE); protein transporter	encodes a Sec1 protein and expressed throughout the plant. physically interacts with Syntaxin1 and is required for cytokinesis.	Identical to SNARE-interacting protein KEULE (KEU) [Arabidopsis Thaliana] (GB:Q9C5X3;GB:Q0WTH1;GB:Q9LNB0); similar to SEC1B, protein transporter [Arabidopsis thaliana] (TAIR:AT4G12120.1); similar to SEC1A, protein transporter [Arabidopsis thaliana] (TAIR:	93.46	107	6	1	50	367	560	666	2e-51	198
All.Contig_1142	GGTSCTCCTGAGCCCCGAYCTCTCACCTCCTCAAGCTCCCTCGTCTCTGTCGATTAGTTTCTCSRAAGAGAAGATGCCGAAGATTAAGACCAACCGAGTCAAGTACCCAGAAGGGTGGGAGTTGATCGAGCCTACTCTTCGTGAGCTTGACGCCAAGATGAGAGAAGCTGAGATGGATGAACATGATGGCAAGAGAAAGTGTGAAGCTTTATGGCCAATCTTCAAACTCTCTCATCAGAGGAGTCGCTATGTCTATGACCTTTATTACCGCAGGAAGGAGATATCTAAAGAGCTCTAYGAGTTCTGCTTGGACCAGGGCTAYGCWGATCGTARCCTSATTGCYAAATGGAAGAAGTCAGGRTATGAGCGTYTATGCTGCTTGCGCTGCATACAGCCAAG…	710	2	AT4G21110.1	G10 family protein		similar to Os01g0857700 [Oryza sativa (japonica cultivar-group)] (GB:NP_001044856.1); similar to unnamed protein product [Vitis vinifera] (GB:CAO70987.1); contains InterPro domain G10 protein; (InterPro:IPR001748)	93.79	145	9	0	74	508	1	145	1e-83	305
All.Contig_1143	GGTTCTTCTCCCTCTAAACCTTCTCTGCAACAAAACTCCTCACTTTCTCTCTCTCTCTATAGAAAAAGTTCGAAGCGTTTACTCGAAAAAGACTTTGTCTTTTAGGTTTCTTAGTGAAAATGGCGATCGAGGATCAAGAGAATGCCATCCGAGAAATCAAACCTAAGAACAGAAGAATCATGGGAGCTGGTGGACCGGAGGAGGAAGATAACAGGCAGCCGCCATGGCTGAAACCTCTGCTTCAGGAGAAATTCTTTGGTCACTGCAAGTTTCATGTAGACTCTCACAAGAGTGAATGCAACATGTACTGCTTAGACTGTACCAACGGTCCGCTTTGCTCTCTCTGTCTTGCCCATCACAAGAATCATCACACCATTCAGATAAGGAGATCTTCTTATC…	1202	2	AT4G17900.1	zinc-binding family protein		similar to zinc-binding family protein [Arabidopsis thaliana] (TAIR:AT1G32700.1); similar to hypothetical protein [Vitis vinifera] (GB:CAN63851.1); contains InterPro domain Protein of unknown function DUF597 (InterPro:IPR006734)	76.11	226	41	1	120	758	1	226	4e-99	358
All.Contig_1144	ATGCTCGACCGTATCCTTCGTCTTCTTACGTCTTACTCCATCCTCACCTGCTCCAGTCGTACTATTCCCGGCGGCGACAGCGTCGAGAGGATTTACGGGCTTGGTCCGGTTTGCAAGTATTTGACCAAGAACGAGGATGGTGTGTCCATTGCTGCTCTCTGTCTTATGAACCAAGACAAGGTTCTCATGGAAAGCTGGTACCATTTGAAAGATGCAATTCTTGATGGTGGGATTCCATTCAACAAGGCCTATGGAATGAGCGCTTTCGAGTACCATGGGAAGGACCATAGGTTCAACACGGTATTCAACAATGGAATGTCTAACCATTCAACCATCACAATGAAGAGGATTCTTGAGACCTGTAAGGGTTTCGAAGGACTGACTTCTTTGGTGGATGTT…	1096	2	AT5G54160.1	ATOMT1 (O-METHYLTRANSFERASE 1)	A caffeic acid/5-hydroxyferulic acid O-methyltransferase. Interacts with 14-4-3 proteins in yeast 2 hybrid assay. AtOMT1 (At5g54160) encodes a flavonol 3?-O-methyltransferase that is highly active towards quercetin and myricetin. The substrate specificit	Identical to Quercetin 3-O-methyltransferase 1 (OMT1) [Arabidopsis Thaliana] (GB:Q9FK25;GB:O49964;GB:Q42170); similar to O-methyltransferase family 2 protein [Arabidopsis thaliana] (TAIR:AT1G77530.1); similar to O-methyltransferase [Fragaria x ananassa]	91.07	291	26	1	1	873	74	363	1e-155	546
All.Contig_1145	GGTAACATTTGGGGTAATAACAGAATCATTTGAAATTTATAACTCACATAGAGCGAAGAAGAAGAAGAACCCCTATCACCCTATCAGAATCTGATCCCATCTTTCTTCAATTCTCAAGGCCAAAAGTTGAGTAAAGAGTTGAAAATGGAAGGGACTGTGTTCACGCCGTGTTTGGAAGGAATGAAGAATGTCAAGTCTGAACAAGGGGAGATGCTTACTAAGCCTTTTCTAGACCTCTGCAAGACCATCTTGCCTGTTATAGATAAATTTGGAGCCGCTATGACTCTTGTGAAAGCTGACATTGGTGGCAACATATCGAGGTTGGAGAAGAACTACTTGTCTGATCCCGACAAGTACAAGTACTTGTACACCTTTGTTCAAGGTGAAATTGAGTCTAAG…	924	2	AT2G33470.2	GLTP1 (GLYCOLIPID TRANSFER PROTEIN 1); glycolipid binding / glycolipid transporter		similar to GLTP3 (GLYCOLIPID TRANSFER PROTEIN 3), glycolipid binding / glycolipid transporter [Arabidopsis thaliana] (TAIR:AT3G21260.2); similar to unnamed protein product [Vitis vinifera] (GB:CAO71432.1); contains InterPro domain Glycolipid transfer prot	91.09	202	18	0	145	750	1	202	8e-106	380
All.Contig_1146	GGTCGCTGCTGCGTCTCTCTCTCTCCCGCAACCTCCAGATAATAAAAAAACAATAAGCGACCATGTTGGTGTACACCGATCTTCTCACCGGTGATGAGCTTCTCTCTGACTCTTTCCCTTACAAGGAGATTGAGAATGGGATTCTTTGGGAAGTTGAAGGAAAGTGGACTACCAAGGGATGTGTAGAGGTTAACATTGGTGCCAACCCATCTGCTGAGGAAGGTGGTGAGGACGAGGGTGTTGACGACTCTGTTGAGAAAGTTGTTGACATTGTCGACACTTTCAGGCTTCAGGAGCAGCCCACTTACGACAAGAAGGGGTTCATCGCCTACATCAAGAAGTACATCAAGCTTTTGACGCCCAAGCTCACCCCGGAACAGCAGGAGGAGTTTAAGAAGG…	733	2	AT3G16640.1	TCTP (TRANSLATIONALLY CONTROLLED TUMOR PROTEIN)	Encodes a protein homologous to TRANSCRIPTIONALLY CONTROLLED TUMOR PROTEIN (TCTP).	Identical to Translationally-controlled tumor protein homolog (TCTP) [Arabidopsis Thaliana] (GB:P31265;GB:Q8L973;GB:Q9LUS0); similar to translationally controlled tumor family protein [Arabidopsis thaliana] (TAIR:AT3G05540.1); similar to Translationally-	89.88	168	17	0	63	566	1	168	2e-74	275
All.Contig_1147	TGGTGTGGGTGTGACTGGTAGAGTTTATAAAGAGTTTAAGCTTGAAGAGTATCATCCATGGCTTAAAACAAGGGTAATGGATGCTAATTATTGGTTGACTATAAAGACTTGTCTCTTGGGCTCACTCACTTGCTCTAAGCTCTCTTTTTGGACTCCTATTGATTATCTCCAAAAGGACTTGACTCCTCTTCAGTCTGGCTGCTGCAAACCACCAACATCGTGCGTATACAACACGGAGACGCCAATACAGCAAGAATCCGATTGTTACCGGTGGAACAACGCTGCGACGGTGCTCTGCTACGACTGTGACTCGTGCAGAGCTGGCGTTTTAGAGACAGTGCGGCGTGATTGGCATAAACTCTCTATAGTTAACGTAGTCATTGTTGTCTTCCTCATCGC…	669	2	AT3G12090.1	TET6 (TETRASPANIN6)	Member of TETRASPANIN family	similar to TET9 (TETRASPANIN9) [Arabidopsis thaliana] (TAIR:AT4G30430.1); similar to unnamed protein product [Vitis vinifera] (GB:CAO68973.1); contains InterPro domain CD9/CD37/CD63 antigen; (InterPro:IPR000301)	52	175	84	1	2	526	101	274	2e-59	225
All.Contig_1148	AGGTTACAGACGCTGGACTTGGAGCTGTTGCAAGAGGTTGTGCCTCTCTTAAGGTTCTGTCTCTTTGGAATCTGCCTGCTGTTAGTGATGTTGGTGTCTCTGAGATCGCAAGGTCGTGTCCTATGATCGAAAAGCTTGACCTTTCGCGGTGTCCTGGGATAACTGATAAGGGTTTGGTTGCGATCGCTGAGAATTGTAAGAATCTAAGTGATCTCACGATTGATTCGTGCTCTGGCGTCGGCAACGAGGGGTTGAGGGCGGTTGCGAGAGGGTGTGGTAACCTGAGATCTATCTCTATCAAGAGCTGTCCACGTATTGGTGATCAAGGAGTTTCTTTCCTCTTGGCTCAAGCTGGTTCTTACTTGACTAAGGTGAAGCTTCAGATGGTGAACGTGAGCG…	1075	2	AT5G25350.1	EBF2 (EIN3-BINDING F BOX PROTEIN 2)	Arabidopsis thaliana EIN3-binding F-box protein 2 (EBF2) mRNA. Part of the SCF complex, it is located in the nucleus and is involved in the ethylene-response pathway.	Identical to EIN3-binding F-box protein 2 (EBF2) [Arabidopsis Thaliana] (GB:Q708Y0); similar to EBF1 (EIN3-BINDING F BOX PROTEIN 1), ubiquitin-protein ligase [Arabidopsis thaliana] (TAIR:AT2G25490.1); similar to unnamed protein product [Vitis vinifera] (G	86.63	359	46	1	3	1073	154	512	5e-163	570
All.Contig_1149	GATCACACCCTTCACTACTAATAAACAAAASAAAAAGAAAAACAAGATGTGGGATGAAACTGTAGCTGGACCTAAGCCGGAGCATGGCCTTGGCCGCCTCCGCAACAAGATCAACGCCCAACCTATTGACATCAAAGGTGTAGGAGAAGGGAGCAGCAGCAAGGCTATGCCTGCGGTGGCCGGGAGTCCTGGAACTCCAACGACGCCWGGATCTGCACGTAAAGAGAACGTGTGGAGGAGTGTGTTTCATCCAGGAAGTAACATCGCCACCAGAGGAATGGGTACTAACCTCTTCRACAAGCCCTCTCACCCAAACGCTCCCACCGTCTACGACTGGTTGTACAGCGACGATACTAGGAGCCAGCACCGTTGAGCCGAGATCGAGAGGAAGGAGTGRCA…	640	2	AT2G33830.2	dormancy/auxin associated family protein		similar to DRM1 (DORMANCY-ASSOCIATED PROTEIN 1) [Arabidopsis thaliana] (TAIR:AT1G28330.1); similar to auxin-repressed protein [Brassica oleracea] (GB:AAL67436.1); contains InterPro domain Dormancyauxin associated (InterPro:IPR008406)	91.67	108	9	0	47	370	1	108	2e-56	215
All.Contig_115	GATSAACCTCCATGTCCGATATATATCTAACAGAGAAGTAACTCAAATTTTAATTTTCTAGTAGACTAGTTTTTTTTTTTCGTGGATTATTATCTAAGAAGAGAGAAAATGTTGGGAATTTTTAGCGGAGCTATAGTATCATTGCCGGAAGAGCTGGTGGCCGCCGGCAGCAGAACTCCGTCGCCGAAGACAACCGGAGCGGCTCTAGTTAACAAATTTGTCGAGCAAAATCCATCTGTTGTGACCGTACAAGTCGGAGACAATGTGCAGCTTGCCTACACCCACCACAAAGAGAGTCCTCTCCGGCCAAGGTCATTTGGGGCGAAGGATGAGATATTCTGCTTGTTCCAAGGCTCACTTGACAACTTAGGAAGCTTGAAGCAGCAATACGGGCTTGCT…	1040	4	AT5G19140.1	auxin/aluminum-responsive protein, putative		similar to unknown protein [Arabidopsis thaliana] (TAIR:AT5G43830.1); similar to aluminum-induced protein [Brassica rapa] (GB:ABV89631.1); contains domain PTHR11772 (PTHR11772); contains domain G3DSA:3.60.20.10 (G3DSA:3.60.20.10); contains domain SSF56235	92.7	233	17	0	109	807	1	233	1e-122	436
All.Contig_1150	CCTCCGGTTGGGAGCAAAAAATGGGAATTCTCAACGACGACGCCGTTTTAATCGAACCGGGAAAAAACTCCGGCGATCCCACCATGGTCACCGTGAATTGCCCAGATGAATCAGGTCTTGGTTCAACTCTCTGTAGAATCATCCTCGAGTTCGGTCTCTCCATCACCAAAGCAGATTTTTCAACGGATGGAAGATGGTGTTACATAGTGTTTTGGGTCAGTCCTGATAACGGTTCTTCTAGATTCGATTGGGACAGCTTGAAGAACCGTCTCTTGTCTGCTTGTCCGTCTTGCTTGGGTTCCTATTACTCCTCTCTTCAGTCTTCTAATGTCTCTAAGCCTCCTTCTCTTTACCTCCTCAAGTTCTTCTGCCGCGACAGGAAAGGACTGCTTCACGATG…	1231	2	AT2G39570.1	ACT domain-containing protein		similar to ACT domain-containing protein [Arabidopsis thaliana] (TAIR:AT2G36840.1); similar to unnamed protein product [Vitis vinifera] (GB:CAO69235.1); contains InterPro domain Amino acid-binding ACT; (InterPro:IPR002912)	87.78	409	44	3	21	1229	1	408	0	695
All.Contig_1151	GGGCTTSGGGATCAAGCCACAGTCCCTCCACAGATCAACCTCCGCCATCTCTCCCGAATTTAGGGAATGCTGCTGGTGTTTGTATAATGAGCAATGCGTGGAAGGATGAGCAGCACCCTTCCCTGATCAGTTTCATATCGTCGTATCTCGGCTCAAACTCTTTGAGGCTTAACTTTGTCTCCATCTCCCCTGATCTGATCTTCAATTGTGGAGGCGTGTCTATTGCTTTTGTTTTTGTGACAAAGTGGGATGATTGTTGCGACGTTGGCTCCTTCTTCAACAGAGTCAAGAGGCTGAAAACGCAATTTGCGCGACTTTACGTTGTTGCCACACTTTCAACTAAAGAACAGAATGATTCTTTCATGCGGTCTTACTTCCAATATGAGATGGAGTTTGGGA…	545	2	AT1G12790.1			similar to unnamed protein product [Vitis vinifera] (GB:CAO44590.1); contains InterPro domain RuvA domain 2-like (InterPro:IPR010994)	79.89	179	35	2	9	542	5	182	3e-74	274
All.Contig_1152	GGTTGCGAAAATCCGATCTACGTCTCTCCAATCTTCCTGCGCCACAGCAAACCTTCGACCAACGATCTCCGGCAAAGATGAACGACGGAGAAGTTTCGAGGCAGATCCAGCAGATGGTGAGATTCATTCGCCAAGAGGCTGAGGAGAAGGCAAACGAGATCTCCGTCTCCGCTGAGGAAGAATTCAACATCGAGAAACTGCAGCTAGTTGAGGCGGAGAAGAAGAAGATCAGGCAAGATTATGAGAAGAAGGAGAAGCAGGCTGATGTACGCAAGAAGATCGATTACTCGATGCAGCTAAACGCGTCAAGGATCAAAGTTCTTCAAGCACAGGATGATATTGTCAATGCCATGAAAGACCAAGCAGCAAAGGATCTTCTCAACGTCWGTGGCGATGAGT…	780	2	AT4G11150.1	TUF (VACUOLAR ATP SYNTHASE SUBUNIT E1)	Encodes a vacuolar H+-ATPase subunit E isoform 1 which is required for Golgi organization and vacuole function in embryogenesis.	Identical to Vacuolar proton pump subunit E (VATE) [Arabidopsis Thaliana] (GB:Q39258;GB:O82502); similar to VHA-E3 (VACUOLAR H+-ATPASE SUBUNIT E ISOFORM 3), hydrogen ion transporting ATPase, rotational mechanism [Arabidopsis thaliana] (TAIR:AT1G64200.1);	94.78	230	12	0	78	767	1	230	3e-120	427
All.Contig_1153	ACTCTGGTGTTGCCACGATCTTCTATGTGGAATCATCCAGCTTGGGTTCTTGGAGGTGTTGATGGTTCTCTCGGGATTATCCCGGCTCCCTAAAGCTCCGCTAGTTTTGCTCTGTCTTTCTTACCATYGATTGATCTCCTTTTCGGACAGTAAATCCGAGTTCGATCGGAGGATTGATCTTGATTAAAGTTGGGTTTTATATGAAGAAAAGTATGGGTTTGGATGAGATCTCGGTTCTATCCGATTGATATTCTCCAAAGCTCAGGGTACGTGTTTAGCTGATGAAGCCTTTAGCTTCCAATACAGTCGTTGGAGGTGGCTTTCTCGGTGGTGGATGTGGTTGAGTTCCCGGTGGATTCCGGTGTTTTAAACGCTTTGTTTGGTTCGGTGGAGAAGATT…	724	3	AT4G27420.1	ABC transporter family protein		Identical to Probable white-brown complex homolog protein 9 (WBC9) [Arabidopsis Thaliana] (GB:Q9SZR9); similar to ABC transporter family protein [Arabidopsis thaliana] (TAIR:AT1G31770.1); similar to hypothetical protein [Vitis vinifera] (GB:CAN62144.1); s	31.11	45	25	1	562	678	398	442	4.3	28.5
All.Contig_1154	GGTTCACGTTCTTTCCCCATTCACAATGAGCTCCGACAATAGAGATCATTACTGGTTCAACGGTCATGGACACCACTCCTTCTGGCCTAACCCTTCTACTTATGACCGCAACAGCAAGATCATGCTSGCAGCCGTCGTCTCTTTATCAGCAGTGATCCTCTTTGTCTTCATTCTCCATCTCTACGCAAGGTTCGYTCTCCGCCGCCGCAGAGAGACTTTCCGCGGCCTCCCCGTCGTCGTCCGCCACCCTTTCCAGACGCCAAAACGTGGCCTCGACCCGACACTCATCGCTTCTCTCCCTAGTTTCACCGTCCGTGACGTGGCGTCGGCTATCGAATGCGCCGTGTGTCTAAGCATGTTGGAGGAGCAAGACACGGCTAGAGAGCTGCCGAGCTGCAA…	731	2	AT2G42360.1	zinc finger (C3HC4-type RING finger) family protein		Identical to RING-H2 finger protein ATL2L (ATL2L) [Arabidopsis Thaliana] (GB:Q9SLC3); similar to zinc finger (C3HC4-type RING finger) family protein [Arabidopsis thaliana] (TAIR:AT2G42350.1); similar to unnamed protein product [Vitis vinifera] (GB:CAO6984	73.53	238	59	3	26	727	1	232	2e-74	275
All.Contig_1155	GGTKGTCTTAAGCTGTGTACAGAATCAAGTTTCAGACAGAGAGAGAGAGAAACAAATTCRMGAAAGACGACTAAAGAAAATCTCAAAAAGCCTCTSAYYCATCCAGAAGGTTTRGTCAAAGAAGAAGATGAACTCTCGCGCGATCTACGCCGTCATCGCGCTCCTCGCGCTCGTAATCTCAGCCGTCAACGCAACCGGAGGCTTCGGAGAYTCGCTTGATTTCGTACGGACRGGATCTTCTTCGCTCTTCTCTGGATGCGAAGGTTCGATCGCTGAGTGTATAGCCGAGGARGAGGAGATGGAGTTCGAYTCMGAKATCAGCCGGCGCATTYTAGCGCAGAAGAAGTACGYTAGCTACGGTGCGATGAGGAAGAACAGTGTGCCTTGCTCGCGACGTGG…	636	2	AT3G05490.1	RALFL22 (RALF-LIKE 22)	Member of a diversely expressed predicted peptide family showing sequence similarity to tobacco Rapid Alkalinization Factor (RALF), and is believed to play an essential role in the physiology of Arabidopsis. Consists of a single exon and is characterized	similar to RALFL33 (RALF-LIKE 33) [Arabidopsis thaliana] (TAIR:AT4G15800.1); similar to rapid alkalinization factor preproprotein [Nicotiana attenuata] (GB:AAS13437.1); similar to RALF precursor [Nicotiana tabacum] (GB:AAL26478.1); contains InterPro domai	92.71	96	7	0	194	481	24	119	2e-36	149
All.Contig_1156	GAAATTCAAAAACCTAGGTGGGATAGAAGAATTGATAAAGGTAATAGATATGATGATAGAAATCATACTGAGAAAGAGAGGAATTCCGTATAGGTACAACTCTTATTTTTACGAAGTAAAAAAAATGCGATCTTTCTTGTCTAATAGAACAAACACTAAGACCTTAATTGAGTCAGTCAAAATAAAATCTGTTTATCAAAGTGCTTCTCTGATTGCTCAAGACATCTCTTTTCAACTGAAGAACAAAAGAAGATCATTTCATTCCATTTTTGCTAAAATAGTGAAGGAGATTCCAAAAAGGGTGGAGGGAATCCGTATATGTTTTTCTGGTCGATTAAAAGACGCAGCAGAAAAAGCTCAAACTAAATGCTATAAGCATAGAAAAACTTCTTGTAATGT…	769	2	ATMG00090.1		ribosomal protein S3	Identical to Mitochondrial ribosomal protein S3 (RPS3) [Arabidopsis Thaliana] (GB:Q95749); similar to ribosomal protein S3 [Brassica napus] (GB:CAA45192.1); similar to ribosomal protein S3 [Brassica napus] (GB:YP_717168.1); similar to Mitochondrial riboso	94.86	175	9	0	2	526	382	556	3e-88	321
All.Contig_1157	GCCAGTTTCAGAAAAATGTGTTCTGCTTAAGAGAAAGAGATCTTCTAGAAAGATTCACTTCTGAAGTTGCGCAGCTTCAAGGGAGGGGAGAGAGTCGAGAGTCCTCTTTCCTCGTGAATCATGAACTTGCTGAGGACTTAGGCAAAGCTTTCACAGAGAAAGCAATACTGCAAACTATTCTGGATGCTGAGGCCAAACTACCTGCTGGCTCAATGAAGGATGTGTTGGGTCTTGTAAGATCAATGTACGCATTGATCAGCATTGAAGAAGATCCGTCGTTCTTGAGATACGGTTACCTCTCAAGGGACAACGTTGGAGATGTGAGGAGAGAGGTTTCTAAGCTCTGCGGAGAGCTTAGACCTCACGCGCTTGCACTGGTCAGTTCATTCGGGATTCCAG…	726	2	AT1G06290.1	ACX3 (ACYL-COA OXIDASE 3); acyl-CoA oxidase	Encodes an acyl-CoA oxidase with specificity for medium chain fatty acids.	Identical to Acyl-coenzyme A oxidase 3, peroxisomal precursor (ACX3) [Arabidopsis Thaliana] (GB:Q9LLH9;GB:Q9C839;GB:Q9LKX5;GB:Q9LMI8;GB:Q9M7X6); similar to ACX6 (ACYL-COA OXIDASE 6), acyl-CoA oxidase [Arabidopsis thaliana] (TAIR:AT1G06310.1); similar to	90.79	152	14	0	3	458	524	675	3e-75	278
All.Contig_1158	CAAGCAGCCGATGACTCTCTTCGGGAAGACGATCAAGCTCGTCTCGATCGGCTCAAGTACGTGTTGAAGGAAGGCTTGTTCGACGTCGACAGCGATGTCACCGATGGACAGACGAACGATTTCTTGCGGGACATCTCCGAGCTGAAGAAGCGGCAGAAGAGTGGTATCATGATGGGAGATAGGAAGAGGAAGAAGAGTAGTAGAGATGAGGAAGGTGATAGAGGGGAAGCGAGGGATGATGATGAGATTAGTGGYGAGTCTAGTGATGTTGATGCTGATAAGGATTTGAAGCGTTTGAAGTCTAACTTCGAGGAKCTTTGTGATGAGGATAAGATWCTTGTGTTCTAYAAGAAGCTGTTGATTGAGTGGAARCAGGAGCTTGATGCTGTGGAGAACACT…	811	2	AT1G03140.1	splicing factor Prp18 family protein		similar to splicing factor Prp18 family protein [Arabidopsis thaliana] (TAIR:AT1G54590.1); similar to unnamed protein product [Vitis vinifera] (GB:CAO22532.1); contains InterPro domain Pre-mRNA processing factor 4 (PRP4) like (InterPro:IPR014906); contain	85.23	264	37	2	25	810	125	387	9e-125	442
All.Contig_1159	GACACCAAGCTAATTTATTCTCAGTTAAACTAAAACATATTTTAAACACACAAAGTTAAAATGGCGGGCCGTGACATCTTCCAGCTGCGTTTCGCGRCTGTCGCGGTATCCGTCGCCGTATTGACCTTCCTAGTCTCCAGCCAAGTCACAGAAGCATCACGTATGATGAGCTTATGTTCTCACACCGCGTATCCATCTCTATGCCAACCTATGATTAAACGTATCACCAACCCAAGACGCGCCACGCACAAAACCATCCAGGCTTTGGAAGCCAAGACAAWACTGGCTTTAGCTGATGCGGCTAGGTACAAAGATGGTAACCAAGCGATCGCTACGTGTTACGCGGTGTTTAGCGATGCGGTTTATAATCTTGCGAACGCGAGGAAGAGTATAAGGAAA…	745	2	AT1G10770.1	invertase/pectin methylesterase inhibitor family protein		similar to invertase/pectin methylesterase inhibitor family protein [Arabidopsis thaliana] (TAIR:AT1G60760.1); similar to pectin methylesterase inhibitor [Brassica oleracea var. botrytis] (GB:AAZ20131.1); contains InterPro domain Pectinesterase inhibitor;	73.21	168	45	1	61	564	1	167	4e-62	234
All.Contig_116	GGGACAAGTTAAAGGAAATGGGATGAGCAATGAGGATGTGATAGAGGAATGCAAGCTGTTCTATTTCGCCGGGCAAGAGACAACTTCAGTACTTCTGGTTTGGACAATGGTTCTGCTAAGCCAACACCAAGATTGGCAAGCTAAGGCAAGAGAAGAAGTGAAACAAGTCTTTGGCGATAAAGTACCTGATATAGATGGTCTTAACCAGCTCAAAGTTATGACGATGATCTTGTATGAGGTTCTTAGGCTATATCCTCCAGTGACACAGGTGTCACGAGCCATTCACAAAGAGATGAAGCTAGGAGACCTGACATTACCAGGCGGCGTTCAGATCAGTCTACCTATCCTGCTAGTTCAACATGACACCGAGCTGTGGGGGAACGATGCTGCGGAGTTCAA…	782	2	AT3G14690.1	CYP72A15 (cytochrome P450, family 72, subfamily A, polypeptide 15); oxygen binding	putative cytochrome P450	similar to CYP72A14 (cytochrome P450, family 72, subfamily A, polypeptide 14), oxygen binding [Arabidopsis thaliana] (TAIR:AT3G14680.1); similar to CYP72A13 (cytochrome P450, family 72, subfamily A, polypeptide 13), oxygen binding [Arabidopsis thaliana] (	90.57	212	20	0	5	640	301	512	2e-111	398
All.Contig_1160	GACATTTCCCGAGTCTTCTCTCAGTTTCACTTCCGGGCTTTATCACTCTCTGAACCAACAAAGAAGAAAAAATGAGCTCCCAAATCTGCAGATCTGCTTCGAAAGCAGCAAGGTCTCTTCTCTCTTCAGCTAAGAATGCTCGTCTCTTCTCCGAAGGACGAGCCATTGGTGCGGCGGCTGCGGTTACTGCATCTGGAAAGATGCCTCTCTATGCATCTAACTTTGCCAGATCATCAGGTTCTTCAAAGAGTTGGATCACTGGACTCTTGGCTCTTCCTGCTGCAGCCTTCATGGTTCAAGATCAGGAGGTTTTTGCTGCTGAGATGGAACGCACTTTCATTGCGATCAAGCCTGATGGAGTCCAGCGAGGATTGATATCAGAGATCATTTCTCGATTTG…	577	3	AT4G11010.1	NDPK3 (NUCLEOSIDE DIPHOSPHATE KINASE 3); ATP binding / nucleoside diphosphate kinase	nucleoside diphosphate kinase 3 (ndpk3), located to the inter-membrane space in mitochondria	Identical to Nucleoside diphosphate kinase III, chloroplast/mitochondrial precursor (NDPK3) [Arabidopsis Thaliana] (GB:O49203); similar to nucleoside diphosphate kinase 4 (NDK4) [Arabidopsis thaliana] (TAIR:AT4G23900.1); similar to putative nucleoside di	92.98	171	9	1	72	575	1	171	7e-69	256
All.Contig_1161	GGGGTTTAAGGATACAGCACCACTCCCAAATCTCCTCTCCTCCAAACCCTAAGAATGGTGACGACGAAGAAGAGCGAAAGCAGTCTCAAGTTTCTCTGTAGTTACGGCGGTAGAATACTTCCTCGCTCTATCGACGGGAAGCTCCGTTACGTCGGCGGTTGCACCAGAGTCCTCTCCGTTGTTGATTCCATCTCTTTCTCAGAGCTAATGGTGAAATTGGAGGAGTTCTGTGGATACGCCGTTGATCTAAAGTGCCAGTTACCAGACGGAGATCTCGAGACACTGATCTCCGTCAAGTCAGGCGAGGATCTCACGAACATAGTAGAGGAATACAATCGCGTCTACGGAGGCAAGATTCGAGCGGTTTTATCTACTCCTAAGCAGGTATCGCCACCATCG…	771	2	AT3G48240.1	octicosapeptide/Phox/Bem1p (PB1) domain-containing protein		similar to octicosapeptide/Phox/Bem1p (PB1) domain-containing protein [Arabidopsis thaliana] (TAIR:AT5G63130.1); similar to hypothetical protein [Vitis vinifera] (GB:CAN80873.1); contains InterPro domain Octicosapeptide/Phox/Bem1p (InterPro:IPR000270)	68.75	176	55	3	67	594	8	179	3e-53	205
All.Contig_1162	GGAGAGAGATGTGTGACAAACTCAGTCCGGTCGGCGACGAGAAACAGAGTACGAGGACATCGAATAGGATCAAGAAGCGGAAACACATGGAATCAACTTCCATATACAAGTCTCCTTCAAATATTCAAACGTCTCCTTCAAATATTGAAACGTCTCGTAAGCACAGAAAGAACAACAAAAAGCTCAAACAGAGCAAGACAAAGGGAGCTGATGCGACGCCGTCTAAGGAGAAGAAGAGAGCGGAGACTGTGGGAGGAGAGAAAGAAGAAGAGCATTACGACACCGTTGCGGCTTACCTCTTTAACTCCGCCAACGACAGCACAATCTCTTCGATACTCCCTTACTCCTCTTCCGCTGRGTTAGACTGCGACGGAGGAAGGAATCATTCTCCGTACGATC…	809	2	AT5G14370.1			similar to CIL [Arabidopsis thaliana] (TAIR:AT4G25990.1); similar to unnamed protein product [Vitis vinifera] (GB:CAO14646.1); contains InterPro domain CCT (InterPro:IPR010402)	72.97	37	8	1	704	808	268	304	9e-60	53.5
All.Contig_1163	GGCGAGAGAGCTTTGTAATCCTCTCAAGACCAAACTAGAAGATTATGTTGCCCGTAACCAAGAGAGTTTTCTACTCCGCCGGTGTCTTTACGCCGGCGAGGAAAAGACGGCGATGTGTTTCTTCTTCTGTTTCACCGGCGCCGGAAACTAATACCGGACCCGGTCTGTTAGATTCAATCCCGGACGATCTTGTTGTTTCTATCCTTTGTAAACTTGCTTCTACATCACGGTGTCCCGCTGATTTCATCAGCGTTTTGATGACATGTAAGAGATTAAAGAGTTTAGCTACGTGTCCTTATGTTCTGTCGAGATTGTCTCGAAAAGCAATTGCCATAAAAGCTCTGAATTGGTCGGAATCAGCTCACCGGTTTCTCAAACGCTGTGCCGACGCCGGAAGTC…	1192	2	AT1G67340.1	zinc finger (MYND type) family protein / F-box family protein		Identical to F-box protein At1g67340 [Arabidopsis Thaliana] (GB:Q9FYF9); similar to zinc finger (MYND type) family protein [Arabidopsis thaliana] (TAIR:AT5G50450.1); similar to unnamed protein product [Vitis vinifera] (GB:CAO66168.1); contains InterPro do	82.07	368	51	8	45	1103	1	366	1e-161	566
All.Contig_1164	ATGGATCCTTATATGGTGATCTGAAGCGCATCTGTGAGACCGAACTCGGCATTGTGTCTCAGTGCTGCCTGACTAAGCATGTCTTTAAGATGAGCAAACAGTATATGGCTAACGTGGCTTTGAAAATTAATGTCAAAGTTGGAGGAAGGAATACTGTACTCGTTGATGCCTTATCTAGGCGAATTCCTCTGGTCAGTGATCGCCCCACCATAATCTTTGGTGCTGATGTAACACATCCTCATCCTGGAGAGGACTCAAGCCCGTCCATTGCTGCCGTCGTCGCTTCCCAAGACTGGCCTGAAATTACGAAATATGCTGGCTTGGTTTGTGCTCARGCGCATAGACARGAGCTCATTCAGGATCTSTTCAAAGAATGGAAGGAYCCKCAGAAAGGGGTRG…	1288	3	AT1G48410.2	AGO1 (ARGONAUTE 1)	Encodes an RNA Slicer that selectively recruits microRNAs and siRNAs. There is currently no evidence that AGO1 Slicer is in a high molecular weight RNA-induced silencing complex (RISC). Mutants are defective in post-transcriptional gene silencing and ha	Identical to Protein argonaute (AGO1) [Arabidopsis Thaliana] (GB:O04379;GB:Q9LP83); similar to argonaute protein, putative / AGO, putative [Arabidopsis thaliana] (TAIR:AT2G27880.1); similar to ZLL (ZWILLE) [Arabidopsis thaliana] (TAIR:AT5G43810.1); simila	92.86	364	26	1	3	1094	688	1050	0	677
All.Contig_1165	CATCGAGTTAAGATCAGACACAAGTTTGGCTGAAGCTGTTCAGACACTATCGAAACTCAAGGTCTTGAGCGCTCCTGTTGTAGATGTTGACACGCCTGAAGACGCCAGCTGGATTGACCGCTACATCGGTATTGTGGAGTTTCCAGGCATTGTTGTCTGGCTTTTGCATCAGTTGGACCCAACATCTCCTAGGAGCCCTGCTGTTGCAGGTTCAGATGGAGTTTCTCATGACTTCACCGCTGATATCCTGGATAATGGAGATTCAGCTGTAACTTCTGGAAACTTCTTTGAGGTCCTTACTTCTTCAGAGCTATACAAGAACACCAAGGTTCGAGATATCTCTGGAACATTCAGATGGGCACCCTTCCTTGCTCTGCAGAAAGACAACTCCTTTTTAAC…	540	2	AT3G48530.1	KING1 (SNF1-RELATED PROTEIN KINASE REGULATORY SUBUNIT GAMMA 1)		Identical to SNF1-related protein kinase regulatory subunit gamma 1 (KING1) [Arabidopsis Thaliana] (GB:Q8LBB2;GB:Q9S7W6); similar to CBS domain-containing protein [Arabidopsis thaliana] (TAIR:AT1G69800.2); similar to CBS domain-containing protein [Arabid	92.18	179	14	0	2	538	70	248	6e-87	316
All.Contig_1166	GCTTCTTCTCAATATCATCTCCCCGCACGCTCGCCCACATCGTCTGATTCTTGCGATTCAGAMAACATGGCTCTACCKAACCAGCAAACCGTCGATTAYCCTAGYTTCAAGCTCGTCATTGTTGGTGACGGAGGCACAGGRAAAACWACTTTYGTCAAGAGRCATCTTACTGGRGAGTTYGAGAAGAAGTATGAACCTACYATTGGTGTGGAGGTTCATCCTYTRGATTTCTTCACAAACTGTGGCAAGATCCGTTTCTACTGCTGGGACACTGCTGGTCAAGAAAAGTTCGGTGGCCTTAGAGATGGTTACTACATCCATGGTCAATGTGCGGTGATCATGTTCGACGTGACAGCGCGGCTCACATACAAGAACGTCCCCACGTGGCACCGTGACCTC…	794	3	AT5G20010.1	RAN-1 (RAS RELATED NUCLEAR PROTEIN); GTP binding	A member of RAN GTPase gene family. Encodes a small soluble GTP-binding protein. Likely to be involved in nuclear translocation of proteins. May also be involved in cell cycle progression.	Identical to GTP-binding nuclear protein Ran-1 (RAN1) [Arabidopsis Thaliana] (GB:P41916); similar to RAN2 (Ras-related GTP-binding nuclear protein 2), GTP binding [Arabidopsis thaliana] (TAIR:AT5G20020.1); similar to putative RAN2 small Ras GTP-binding nu	97.51	201	5	0	67	669	1	201	3e-118	421
All.Contig_1167	GAAAGTGAGTTAAGATTKGGTTCGTACAAAGTTACCCAAAAGTCTCGACTTTTATTACTGTTTCGATTCCCGGTGGAGTGTAATCGGAGATGAAGGCGGCGAAGAAGCCAATCCACGCCGTGGACGACATGGGTTCGCCGGCAACCACCGAAAGTCAAAGCCTTTCTCGGTGTTGTTTCCGCCATGGCTGCTCTCGTTCTCTTAAGAATGATTGTTCACGACCACGACAACTTCTTCGTCGCCGCCGAGGCTGTCCACGCCCTTGGAATCTCCGTTCTCATCTACAAACTCACCAAGGAGAAGACTTGCGCTGGATTGTCTCTCAAGACACAAGAGTTAACGGCTCTGTTTCTGGCTGTGAGACTGTACTGTAGCTTTGTGATGGAGTTTGATATTCAC…	543	2	AT1G75760.1	ER lumen protein retaining receptor family protein		similar to ER lumen protein retaining receptor family protein [Arabidopsis thaliana] (TAIR:AT1G19970.1); similar to ER lumen protein-retaining receptor-like [Oryza sativa (japonica cultivar-group)] (GB:BAD33333.1); contains InterPro domain ER lumen protei	90.71	140	13	0	124	543	12	151	3e-68	253
All.Contig_1168	GAGGGTTGGGTCGAGATAACTCACCGGYGATTTCGCGAGATGGGAAGAGACCGCGACGAATCTCCGCCGGMGAAAGCGAAAGGCGACGTCGAGGATAAAGACTACAGAAGAAATTCATCYCGGAGCCGTATCGAAAAGAAGTCCGTCGAAGAAGAAGAAGAAGATGTGAGTCGCCGTGAATCGAAGAGGAAATCAAAAGAGGCCAGAGACTCCGATTCTGGTTCGGGACTGGAAAGCGGCAGCGACTCCGAATCGGACAAGGAAGAGAGACGAAGAAGTAGAAAGTCGAGAGGGAAAAGGAAATCAGATCGGAGATCTCGTAGTAGACGAAGCAGGAGACGCCACGATGATTCCAGTAGTAGCTCGGAATCAGAATCTGAGTCGGAGTATTCGGATTCA…	504	2	AT5G53800.1			similar to unnamed protein product [Vitis vinifera] (GB:CAO39254.1)	58.33	24	10	0	40	111	1	24	0.055	33.9
All.Contig_1169	AGTTATCTTCAGCGCTTCTCCTCCAAATCTTGGCATCTACATCTCCGATTAACCATGAGCAAAGGCCCAGGACTGTTCTCAGATATCGGCAAGAAAGCCAAAGATCTGTTGACGAGAGACTACACCTCCGATCACAAATTCAGTATCTCCACTTACAGTGCCTCCGGCGTGGCACTTACGTCTACTGCTCTCAAGAAAGGAGGAGTGCATGCTGCTGATGTTACCACTCAATACAAATACAAGAATGCTGTCTTCGATGTCAAAATCGACACTGATTCTACTGTTTTGACAACCGTCACATTCACTGAGATCCTCCCATCTACAAAAGCCATCGTCTCCTTCAAAGTCCCTGACAACAGTTCTGGCAAGCTCGAGGTYCAATACTTCCACGACCACGCA…	1143	2	AT5G67500.1	porin, putative		similar to porin, putative [Arabidopsis thaliana] (TAIR:AT3G49920.1); similar to porin-like protein [Brassica napus] (GB:AAW22622.1); contains InterPro domain Porin, eukaryotic type; (InterPro:IPR001925)	89.49	276	29	0	55	882	1	276	1e-122	436
All.Contig_117	GAAGAAGATGACGGGAGTTGATGATGACAAGGAGTTCAAAGAGGAAACCGTGATTCTCAGCGACGACGACAGTGAGGTGGAAGAAGTTAAAGACGGAGGAGAAGAAGGCTCCGACGAGGAAGAAGAAGAAGAAGTCGATGGAAGTGAAGGTGACGATGATGAGGAAGATGAAGACGACGACGAGGTCCAGGTTTTGCAGTCCCTAGGTGGGCCTCCGGTACAGTCGGCTGAAGACGAAGATGAGGAAGGAGAAGAAGACGGAAACGGAGACGATGATGATGATGATGACGATGACGACGACGAYGAYGAYGACGAGGACGACGAAGATGGTGAAGATGAGGAGGATCTTGGGACTGATTACCTAGTGAGGCCAATTGGTCGGGCTGAAGATGAAGAGGA…	747	4	AT1G47970.1	unknown protein			84.96	133	20	1	188	586	68	198	5e-14	74.7
All.Contig_1170	CAAAACGGGATACRGCTACTTCTTTGAAGCCTTTGAGTCKTTCAACGCTCTKGGAGATYCGAGAGCKGTKTTCAGTTTGAAGTACATGTTGYTGTGYAAGATCATGGTYAGCCAAGCTGATGAYGTKGCWGGRATWATCTCCTCRAAGGCKGGACTCCAGTACGTTGGSCCTGATCTWGAYGCCATGAAGGCGGTSGCTGATGCWCACTCGAAGRGGTCSTTGAAGCTGTTYGAGAAYGCGYTRCGTGACTACAAGGCGCAGCTRGAGGATGAYCCRATTGTYCACAGGCATCTCTCTTCKCTTTATGATACGCTTYTGGAGCAGAAYCTKTGYCGTTTGATTGAGCCYTTCTCRCGAGTTGARATWGSTCACATTGCKGAKCTGATTGGRTTGCCGGT…	676	2	AT1G29150.1	ATS9 (19S PROTEOSOME SUBUNIT 9)	specifically interacts with FUS6/COP11 via the C-terminal domain of FUS6/COP11 and associates with an ATPase subunit of the 19S proteasome regulatory complex, AtS6A.	similar to FUS12 (FUSCA 12) [Arabidopsis thaliana] (TAIR:AT2G26990.1); similar to hypothetical protein [Vitis vinifera] (GB:CAN63723.1); contains InterPro domain PCI/PINT associated module (InterPro:IPR013143); contains InterPro domain Winged helix repres	95.45	198	9	0	2	595	222	419	3e-103	370
All.Contig_1171	GTCACCCGGAACCTATGAAAGAAGGGCAGGAATTGTTTCGCAAAGGACTTCTGAGTGAAGCAGCGCTTGCTCTAGAAGCTGAGGTTATGAAAAATCCTGAGAATGCTGAAGGTTGGAGATTACTTGGGGTCACACACGCAGAGAACGATGATGATCAACAGGCAATAGCTGCAATGATGCGGGCACAGGAGGCTGATCCCTCAAATCTAGAGGTGCTTCTTGCGCCTTGGTGTGAGCCATACCAACGAGTTGGAGCAAGCAACTGCTTTGAAGTACTTATACGGATGGCTGCGGAATCACCCTAAGTATGGATCAATCGCACCTCCAGAGCTTGCTGATTCCCTATACCATGCTGATATTGCTAGATTATTTACTGAAGCCTCTCAGATGAATCCTGAG…	839	2	AT5G56290.1	PEX5 (PEROXIN 5); peroxisome matrix targeting signal-1 binding	Encodes the peroxisomal targeting signal type 1 receptor that facilitates peroxisomal protein translocation. It recognizes proteins with the PTS1 consensus sequence (tripeptide SKL or a conserved variant) at the extreme C terminus. The protein has severa	similar to SPY (SPINDLY), transferase, transferring glycosyl groups [Arabidopsis thaliana] (TAIR:AT3G11540.1); similar to peroxisomal import receptor PTS1 [Brassica napus] (GB:ABB92565.1); similar to peroxisomal targeting signal-1 receptor [Citrullus lana	95.5	200	9	0	220	819	529	728	4e-139	390
All.Contig_1172	GAGATAGATCCTGCAAGAACCTAAACCTAASACTCGTTTCTTTGTCATCAGAAAAGATTCTCTGTCTCCCCGATCCTCGTCGATCTGAAGAATCTCGGAGACCACTCACTTCAATGGCGGAATCTGTAGCTTCTCAAACTCCGTCGCTCTCCGAGCAATATCATTTGGAGAAGGAAGTGAAGCAAGACACAAGCGCGAAGCCTGTCGAGGTTGCACCAGAGGTTACTTCTCAAGCTGAAGAGGTTAGCACCGACAAAGCCAGTGAAGAGTCTCCTGCTGAGGACAAGTCTGAGTCTCCTCCTGCTGCTTCTGAAGAGGCTCCTCCTGCTGTGGTAGAGGAAGAGACTCCTGCTGCGGTGGAAGAGAGTAATGATGACAACGCTAGTGAAGAAGTTGTTG…	819	3	AT1G22450.1	COX6B (CYTOCHROME C OXIDASE 6B); cytochrome-c oxidase	subunit 6b of cytochrome c oxidase	similar to cytochrome c oxidase subunit 6b, putative [Arabidopsis thaliana] (TAIR:AT5G57815.1); similar to hypothetical protein OsI_011535 [Oryza sativa (indica cultivar-group)] (GB:EAY90302.1); similar to Os03g0390400 [Oryza sativa (japonica cultivar-gro	71.58	190	39	2	114	638	1	190	2e-64	242
All.Contig_1173	GTAACAAGTTAGTCTCCTCTCTCTTTTCAAGAATTGTAACAGAGGATATCAGAAACAAAACATAAAAAAACATTTGTGAATTTTACTAATTTTGGGGAATATCATTATTTGCAGATGGTCGTTGATAGCTGGGAGATTACCAGGAAGAACAGACAACGAGATCAAGAACTATTGGAACACTCACATCAAGAGGAAGCTTCTCAGCCGTGGGATCGACCCAAACACCCACCGTTCGATCAACGGAYCCGCAACCCCTCCTTCCAAAACGACGACTCCTTCTCTTCAAAACGACGAGCCGGTACGATTCGATTTCTCCGGACCGGATCAACAACGGACGGTTAAACCGGAACCTATGTTACTAGACCGAGAAGAGACTAATAATAACAACATTAATAACTG…	826	2	AT1G22640.1	MYB3 (myb domain protein 3); DNA binding / transcription factor	MYB-type transcription factor (MYB3) that represses phenylpropanoid biosynthesis gene expression	similar to ATMYB6 (MYB DOMAIN PROTEIN 6), DNA binding / transcription factor [Arabidopsis thaliana] (TAIR:AT4G09460.1); similar to MYB1 [Gossypium hirsutum] (GB:AAA33067.1); contains InterPro domain Myb transcription factor (InterPro:IPR015495); contains	65.43	188	59	9	113	658	88	256	4e-47	184
All.Contig_1174	GGATSGAATCAAATCGAAGAAGACGATGAAGATCTTCCACGTTCCCTGTCTACAAGACAACTACTCGTATCTGATAATCGATGAGAGCACCGGAGACGCGGCGGCTGTGGATCCAGTTGAACCGGAGAAAGTGATTCAGTCGGCTGAGCATCACCACGCCAAGATCAAGTTCGTCCTCACCACGCATCACCACTCGGATCATGCTGGTGGCAACGAGAAGATGAAGCAGCTGGTACCTGGAATCAAAGTCTATGGAGGCTCTCTTGATAAGGTCAAGGGATGCACTGATGCTGTCGATAATGGTGACACCTTGTCTTTGGGTCAAAATATTAACATATTAGCTCTTCACRCCCCTTGTCACACCAAGGGTCACATTAGTTACTATGTCACTGGCAAAGA…	617	2	AT3G10850.1	GLX2-2 (GLYOXALASE 2-2); hydroxyacylglutathione hydrolase	glyoxalase II cytoplasmic isozyme (Glx2-2) mRNA, complete	Identical to Hydroxyacylglutathione hydrolase cytoplasmic (GLX2-2) [Arabidopsis Thaliana] (GB:O24496;GB:O04844); similar to GLX2-4 (GLYOXALASE 2-4), hydroxyacylglutathione hydrolase [Arabidopsis thaliana] (TAIR:AT1G06130.1); similar to GLX2-4 (GLYOXALASE	90.86	197	18	0	26	616	1	197	2e-104	374
All.Contig_1175	CAGAGGTGTGAGGATGTTGTGTGCAAGGCTGTGTCTGCAAAGGTCGAAGCTGGAGTTGAAGGTCTCAACATCGCCGAGAATGCTGCTCAGCTTATTGGGAAAACTCCAATGGTGTACTTGAACAATATAGTCAAGGGCTGTGTTGCAAGTGTTGCTGCTAAGCTTGAGATCATGGAGCCTTGTTGCAGTGTCAAAGATAGGATTGGGTATAGTATGATYACWGATGCTGAGGAAAAAGGACTTATYACACCTGGAAAGAGTGTTCTTGTGGAATCKACAAGTGGAAACACAGGGATWGGWCYTGCSTTTATYGCTGCTTCAGAAGGGATATAARCTTATCTTGACWATGCCWGCGTCCATGAGTTTGGARAGAMGGGTTCTTYTGAGGGCGTTTGGAGC…	894	2	AT2G43750.1	OASB (O-ACETYLSERINE (THIOL) LYASE B); cysteine synthase	Arabidopsis thaliana O-acetylserine (thiol) lyase (OAS-TL) isoform oasB, the key enzyme for fixation of inorganic sulfide. It catalyzes the formation of cysteine from O-acetylserine and inorganic sulfide.	Identical to Cysteine synthase, chloroplast/chromoplast precursor (OASB) [Arabidopsis Thaliana] (GB:P47999;GB:O22828;GB:Q42568); similar to OASC (O-ACETYLSERINE (THIOL) LYASE ISOFORM C), cysteine synthase [Arabidopsis thaliana] (TAIR:AT3G59760.3); simila	91.74	109	9	0	1	327	52	160	3e-132	196
All.Contig_1176	GACACGAATATTCGTACACAGAGGAGGAAGAGAGAGRGAGAGCGATAATGGCGTCTAACGGCTTCGCGATGCTATCGATCCTTGTGTTAGCTCTCTTMGCTTCGTCTATTAGAAGCGAAGAGACGGAGACGAAGGAGTTCGTCTTGACTCTCGATCACTCCAACTTCACCGATACAATCAACAAGCACGACTTCATCGTCGTCGAGTTCTACGCCCCTTGGTGTGGCCACTGCAAGAGTCTTGCTCCTGAGTRTGAGAAGGCTGCAGCAGAGTTGAGCAGCCAAAGCCCTCCCATCTTCCTCGCCAAGATTGATGCTAGCGAGGAGTCTAACAAAGGYATTGCGAACGAGTACAAGATTCAGGGATTCCCCACTATCAAGATTCTGAGGAAGGGAGGGA…	806	2	AT1G77510.1	ATPDIL1-2 (PDI-LIKE 1-2); protein disulfide isomerase	Encodes a protein disulfide isomerase-like (PDIL) protein, a member of a multigene family within the thioredoxin (TRX) superfamily.	Identical to Protein disulfide-isomerase 2 precursor [Arabidopsis Thaliana] (GB:Q9SRG3;GB:Q0WV97); similar to ATPDIL1-1 (PDI-LIKE 1-1), protein disulfide isomerase [Arabidopsis thaliana] (TAIR:AT1G21750.2); similar to ATPDIL1-1 (PDI-LIKE 1-1), protein di	80.75	213	41	1	126	764	26	237	2e-88	322
All.Contig_1177	CTATCAGTGGTTATGTCGCAAGGGAAGAAGAATGAATGTTCTTCCTCATCCGTTTGGCTTACAAGGGTTAGCTTAACTGGCACAGTTTTGTATGGAGCCGCATGCTTTGTTTCACTTTCCATGATATCACACACTGGCTTAAACACATCATTAAAAATGGTGTGGATGTTATTTCACGGCCTTGCAGCTGTGAAGTTAATTCGACATTTGCTTTTCACCTTTACTTCTTGTGCCTCATTTGGGGAAGCGCTTCTTGTGACCAGTGGTCTTGTTCTCTATTTTGGCGACTTTCTGGCATGCACAATTGCAAAGATTTGCGAGAAATTGATACCTGTGGATCTTGTCTCAATAAGCTACGGAATAAGGAGAACTGAAACCGGCATAATCGTCCAGGGTCTA…	1079	2	AT3G45040.1	phosphatidate cytidylyltransferase family protein	Encodes a putative dolichol kinase.	similar to unnamed protein product [Vitis vinifera] (GB:CAO16781.1); contains InterPro domain Phosphatidate cytidylyltransferase; (InterPro:IPR000374)	91.94	360	28	1	1	1077	125	484	0	632
All.Contig_1178	GCACCATCGCCACTGGTTTGGCGATTGATGCTTACGGTCCCATCAGTGACAATGCTGGTGGTATTGCTGAAATGGCTGGAATGAGCCACCGTATCCGTGAAAGAACCGATGCTCTTGATGCAGCTGGTAACACCACCGCTGCTATTGGAAAGGGATTTGCTATTGGCTCAGCTGCTCTAGTCTCCTTGGCTTTGTTCGGTGCCTTTGTGAGCCGTGCAGGTGTCCACACCGTAGATGTTTTGACTCCCAAGGTTATCATTGGGCTTCTTGTTGGTGCCATGCYTCCTTACTGGTTCTCAGCCATGACGATGAAGAGTGTGGGAAGTGCAGCGCTTAAGATGGTTGAAGAAGTTCGCAGGCAGTTCAACACCATCCCTGGACTCATGGARGGTACCGCRA…	972	2	AT1G15690.1	AVP1 (vacuolar-type H+-pumping pyrophosphatase 1); ATPase	Encodes a H(+)-translocating (pyrophosphate-energized) inorganic pyrophosphatase (H(+)-PPase; EC 3.6.1.1) located in the vacuolar membrane. Expression is found in all tissues examined, including meristems and floral organ primordium. Expression is particu	Identical to Pyrophosphate-energized vacuolar membrane proton pump 1 (AVP1) [Arabidopsis Thaliana] (GB:P31414;GB:O80390;GB:Q41919;GB:Q41920;GB:Q56WP6;GB:Q8RY20;GB:Q8VZE3); similar to AVP2 (ARABIDOPSIS VACUOLAR H+-PYROPHOSPHATASE 2) [Arabidopsis thaliana]	99.27	274	2	0	3	824	496	769	8e-152	533
All.Contig_1179	GGACAAATTAAARGTYTCGAAATTCGATAGAATCATAATMAMTCTTCTCAATTCTCTCTCAATCKCAAGYTTCRATCAAGATGCAGATCTTYGTGAAAACTCTCACCGGAAAGACCATCACCCTYGAGGTGGARAGCTCYGACACCATCGACAACGTTAARGCCAAGATTCAGGAYAAGGARGGMATYCCTCCKGATCAGCAGAGGCTYATCTTCGCCGGMAAGCAGTTGGAAGACGGMAGRACCTTGGCTGAYTACAAYATCCAGAAGGAGTCTACGCTYCACTTGGTCYTSMGSCTWCGTGGWGGYATGCAGATCTTCGTCAAGACYTTGACCGGAAAGACTATCACTTTRGAGGTKGAGAGCTCTGACACTATTGAYAAYGTYAAGGCYAAGATCC…	753	2	AT4G05320.4	UBQ10 (POLYUBIQUITIN 10); protein binding	One of five polyubiquitin genes in A. thaliana. These genes encode the highly conserved 76-amino acid protein ubiquitin that is covalently attached to substrate proteins targeting most for degradation. Polyubiquitin genes are characterized by the presenc	similar to UBQ4 (ubiquitin 4), protein binding [Arabidopsis thaliana] (TAIR:AT5G20620.1); similar to hexaubiquitin protein [Helianthus annuus] (GB:CAA40324.1); similar to hypothetical protein OsI_005817 [Oryza sativa (indica cultivar-group)] (GB:EAY84584.	96.77	93	3	0	475	753	360	452	6e-111	176
All.Contig_118	GAGATGTCTCCTACGTTACCCATAATATGTGGAAGTATCGACGTAATTTCATAGAGTCATTCGGTCTGAATGCTACATGAAGAACATAAGCCAGATGACGGAACGGGAAGACCTAGGATGTAGAAGATCATAACATAAGTTATTCGGCAGATTTTGATTCCTATATATCCACTCGTGGTGGTACTTCTACCATATATAGAAGAATTCTACGATATATATAAGATAAGATCCATCCGTATAGATATCATCATCTACATTCAGAAAGCCGTATGCTTTGGAAGAAGCTTGTACAGTTTGGGAAGGGGTTYTGATTGATCAAAAAGAAGAATCTACTTCAACCGATATGCCCTTAGGCACGGCCATACATAATATAGAAATCACACTTGGAAAGGGTGGACA…	1274	4	ATCG01310.1		encodes a chloroplast ribosomal protein L2, a constituent of the large subunit of the ribosomal complex	Identical to Chloroplast 50S ribosomal protein L2 (rpl2-B) [Arabidopsis Thaliana] (GB:P56791;GB:Q8HRX3); similar to ribosomal protein L2 [Draba nemorosa] (GB:YP_001123591.1); contains InterPro domain Translation protein SH3-like (InterPro:IPR008991); cont	99.31	144	1	0	338	769	131	274	4e-71	265
All.Contig_1180	GATAACTCAAACAAATCTCTTCTAAAAATTATTCCAAGCAGCAGACAAAAATGGCTCAAGCAATGACTTCGATGGCTGGTTTACGCGGTGCGTCTCAGGCTCTCCAGACCAATGACTCAAACCGTCTGAGCATCTCTAGAGTCACCGTTGGGTCTAAGAGAACCGGGCTTGTGATCAGGGCTCAGCAGAACGAGTCGGTGCCGGAAAGTAGTCGCCGGTCAGTGATTGGGCTCGTTGCTGCTGGTTTAGTCGGTGGYTCGTTCGTTAAGTCTGCCGTCGCCGCTGAAGCTCTTGCTATTAAAGTTGGTCCTCCTCCACCTCCTTCCGGTGGTCTACCTGGAACAGATAACTCRGACCAAGCAAGAGACTTCTCACTGAAGTTGAAAGACAGGTTTTACT…	847	3	AT4G05180.1	PSBQ/PSBQ-2/PSII-Q (PHOTOSYSTEM II SUBUNIT Q-2); calcium ion binding	Encodes the PsbQ subunit of the oxygen evolving complex of photosystem II.	Identical to Oxygen-evolving enhancer protein 3-2, chloroplast precursor (PSBQ2) [Arabidopsis Thaliana] (GB:Q41932;GB:Q9M0X7); similar to PSBQ/PSBQ-1/PSBQA, calcium ion binding [Arabidopsis thaliana] (TAIR:AT4G21280.1); similar to oxygen-evolving enhance	88.31	231	22	2	51	728	1	230	4e-85	311
All.Contig_1181	GGTCTAGATKCCGAGAAAATTTACAGAGAGAAACAAAATGGCGTTGAAGAAGCTATTGATGATCTCCTTCTCTCTAACTTCTCTCCTCTTCTCACTCTTTTACATCATCCCCACGACCACCACTCTCTTCGCTTCTTCAAAGATCCCCACTACATCCCTTGAATCCAACCAAGACTTCAACTCTACGCTCCCCTGTTTCGCCTACCTAATCTCTGCCTCAAAAGGGGACGTTGATAAGCTCAAACGCCTCCTCAGATCTCTCTACCACCGTAGAAACCACTACTTGATCCACCTAGACCTCGAGGCCCCTGAGGAGGAGCATTTGGAGATGGCCAGGTTCGTGGCCGGAGAGCCTCTCTTTCAGCCCGAGGGTAATGTAATGATCGTAGGTAAACCGAA…	599	2	AT3G03690.1	UNE7 (unfertilized embryo sac 7); acetylglucosaminyltransferase/ transferase, transferring glycosyl groups		similar to glycosyltransferase family 14 protein / core-2/I-branching enzyme family protein [Arabidopsis thaliana] (TAIR:AT3G15350.1); similar to glycosyltransferase family 14 protein / core-2/I-branching enzyme family protein [Arabidopsis thaliana] (TAIR	91.98	187	15	0	38	598	1	187	2e-75	278
All.Contig_1182	GGATGCAACCACACTGACTCAGGCTGGTTAYGTGGGAGAGGACGTMGAATCTATATTATACAAACTTCTCACAGTTGCAGATTATAATGTTGCAGCTGCKCAGCAGGGGATTGTTTACATCGATGAAGTYGACAAGATWACAAAGAAGGCRGARRGCCTTARCATCAGCAGAGATGTATCAGGAGARGGTGTTCAACAAGCATTGCTWAAAATGCTGGAAGGAACWATCGTTAATGTACCTGAGAAGGGCGCTAGRAAGCACCCTAGAGGCGACAATATYCAGATAGAYACAAAAGATATWCTCTTCATATGTGGTGGTGYTTTTGTAGACATCGARAAGACSATCTCYGAGAGGCGCCATGATTCTTCAATAGGGTTTGGTGCTCCTGTRCGTGCTAA…	632	2	AT5G53350.1	CLPX (Clp protease regulatory subunit X); ATPase	CLP protease regulatory subunit CLPX mRNA, nuclear gene	similar to ATP-dependent Clp protease ATP-binding subunit ClpX, putative [Arabidopsis thaliana] (TAIR:AT1G33360.1); similar to hypothetical protein [Vitis vinifera] (GB:CAN75136.1); contains InterPro domain ATPase AAA-2 (InterPro:IPR013093); contains Inte	97.62	210	5	0	2	631	255	464	6e-111	396
All.Contig_1183	GCAACTATCGTCTTATGCTACTTGGTGCAACACAAGCACATGACACCTGAAGAAGCATATGCATACGTGAGGTCAATCAGGCCTAGGGTGAAACTAGCTTCCACCCAATGGAGGGCTGTTCTTGAGTACTACAATGTCAGGGTGCTGAATACCACTCAGAGCTCCTTAACCGATGCAACTTCAGCYYTGATCCCGAGAAGTACGAAGCAGGTTTGCTCTGGGAATGTGGTYGTGTTTGATGAYGGGTCGGTGGTSGTAGTGACCCACTCGGATGTAGAAGGCTATGATGATGATGACTCAAGGAGGTCAAYGAAYGTYGCTGCTGGGAACGAGTTATGGGCAGCAGCTGCAGATCTGAGCATGGTGTACCGGGTGAAAGTRGTGGGACAAGCTGCTTTR…	737	2	AT2G35680.1	dual specificity protein phosphatase family protein		similar to dual specificity protein phosphatase family protein [Arabidopsis thaliana] (TAIR:AT5G56610.1); similar to unknown [Populus trichocarpa] (GB:ABK95576.1); contains InterPro domain Protein-tyrosine phosphatase, dual specificity; (InterPro:IPR00034	81.93	166	29	2	4	498	173	337	2e-62	235
All.Contig_1184	CAATCAAATACGTGGTAGAACTGAGAGCATTTTACTCCGTTGCCATGGGTCTAGCTCTCGGCGTTTACATATCTGCAGAGTTCTTTCTTCAAGCTGCTGTTCTACACGCTCTGATTGTCATAACAATAGTGTGTGCCTCGGTTTTTGTCATCTTCACCCATTTTCCATCTGCCTCAAGCACAAAGCTGCTTCCCTGGGTGTTTGCTCTTCTCGTGGCTCTATTTCCTGTGACATATTTGTTAGAAGGGCAGGTCAGAATCAATAATGATCTCGGGGATAATGCTGCCTGGGGCTGGGATGCAAGGGAGGAGGATAAGAAAGTCACAGCAATGTTGGCCATTGAAGGTGCAAGAACATCTCTTCTAGGTCTCTATGCAGCGATMTTTATGCTCATAGCTC…	951	2	AT5G13390.1	NEF1 (NO EXINE FORMATION 1)	Required for normal pollen development and lipid accumulation within the tapetum	similar to predicted protein [Physcomitrella patens subsp. patens] (GB:EDQ76346.1); similar to unnamed protein product [Vitis vinifera] (GB:CAO68713.1); similar to hypothetical protein MA4_111B14.46 [Musa acuminata] (GB:ABF72005.1)	91.46	316	27	0	3	950	749	1064	2e-141	498
All.Contig_1185	GATCAGCATCTTCACAGTATCTTGGTTTTTGATCACTTTTTCTGTTTTTAATTTACGTATCAACTTCCTAACACGATGACTGTTCTTGTTGAACATTACGTCTCTGATTCAAGAATCGAGGAAAAGAAAACAAAAGAGGAGAGGGGTGATGGAGGTTTTATGGTTCCAAAATCTAAAGAAACTGATGAATTCGATGCTCCTGATATCAATTTCCTGGGCCACCTCTTTTAGGGACTATGAGAACGGTGAAAGCGAGAGACAGCAGRGTGTTGAGGAATTCTACAGGATGCAACATATTCATCAGACTTATGATTTTGTGAAAGATATGAGAAAAGAGTATGGAAAACTTAACAAAATGGAAATGAGTATATGGGAATGTTGTGAGCTATTGAACAATGT…	1208	3	AT4G26260.1	MIOX4 (MYO-INOSITOL OXYGENASE 4)	Encodes a myo-inositol oxygenase.	Identical to Inositol oxygenase 4 (MIOX4) [Arabidopsis Thaliana] (GB:Q8H1S0;GB:Q6XGZ9;GB:Q9STQ8); similar to MIOX5 (MYO-INOSITOL OXYGENASE 5) [Arabidopsis thaliana] (TAIR:AT5G56640.1); similar to hypothetical protein [Vitis vinifera] (GB:CAN78063.1); con	33.33	57	32	2	76	228	1	57	3e-117	28.9
All.Contig_1186	GATCGTCGTCAATCTCATTTTGCTATCTCGATTTTTCAGATCTTTGAAAACTTACTGAGGAGATATGTCGGGAAGAGGAAAAGGAGGAAAGGGATTGGGAAAGGGAGGAGCCAAGAGGCACAGGAAGGTGCTGAGGGATAACATCCAAGGTATCACCAAGCCTGCCATCCGTCGTCTTGCCCGCAGAGGAGGTGTCRAGCGTATAAGCGGACTGATCTACGAGGAGACCAGAGGAGTCCTCAAGATCTTCCTCGAGAATGTCATCCGTGACGCTGTTACATACACCGAGCACGCTWGGAGGAAGACTGTTACGGCTATGGATGTGGTTTACGCGTTGAAGAGGCAAGGACGCACTCTCTACGGTTTCGGCGGTTAATCCAAAGATTGAGATTARTGTTA…	580	2	AT5G59970.1	histone H4		Identical to Histone H4 [Arabidopsis Thaliana] (GB:P59259;GB:P02308); similar to histone H4 [Arabidopsis thaliana] (TAIR:AT5G59690.1); similar to histone H4 [Arabidopsis thaliana] (TAIR:AT3G45930.1); similar to histone H4 [Arabidopsis thaliana] (TAIR:AT3G	97.56	82	2	0	128	373	22	103	3e-39	157
All.Contig_1187	ACCGGAAGTGCAGGGGAAGAAGCAAGGAGATAACGTGGGGAGCAGGTTTCCTGTTTTACGGCGACGTGAACGGCTTATAGTTATAGCTGTTGATTGCTATAACGAGGAGGGAGCGGTAGATGTAAAATCTATGGTGACGATGATTCAGAACATCATCAAAGCCGTGAGATCGGATCCTAAGATGGCTAAGAACTCTGGTTTCGCGTTATCCACTTCGATGCCGCTTGATGAGTTGACTAGCTTCTTCAAGTCTGCTAAGATTCAGGTGAGCGAGTTCGACACGTTGATATGCAGCAGTGGGAGCGAAGTGTATTACCCGGGAGCTGAAGAAGGGAAGCTTCTTCCTGATCCTGACTATGCATCGCATATAGATTATAGATGGGGTAATGAAGGGCTTAA…	1116	2	AT1G04920.1	ATSPS3F (sucrose phosphate synthase 3F); sucrose-phosphate synthase/ transferase, transferring glycosyl groups	Encodes a protein with putative sucrose-phosphate synthase activity.	similar to ATSPS1F (SUCROSE PHOSPHATE SYNTHASE 1F), sucrose-phosphate synthase/ transferase, transferring glycosyl groups [Arabidopsis thaliana] (TAIR:AT5G20280.1); similar to ATSPS4F, sucrose-phosphate synthase/ transferase, transferring glycosyl groups	88.1	311	37	0	2	934	750	1060	8e-160	560
All.Contig_1188	GGGCTACTCTCCGGTCATCTTCGATCCTCTCAATCGCGGAACCCTAGTTGTTAGGATCGAGAATGAGTCAGCCATGTGTGGTTCTCGCAACAGCGAGCTACGATCACACGATCCGATTCTGGGAAGCCGAGAGCGGTCGCTGTTACCGCACCATTCAGTATCCTGACTCGCATGTGAATAGGCTGGAGATAACCCCAGATAAGCGTCATCTGGCAGCAGCTTGTAATCCTCATATACGTCTCTTTGATGTTAATTCCAACAGCCCTCAACCTGTGATGACTTATGATTCACACACCAACAATGTTATGGCAGCGGGGTTCCAGTGTGATGGGAAATGGATGTATTCTGGATCAGAGGATGGTACTGTTAAAATCTGGGACTTGAGGGCTCCAGGTTGCC…	585	3	AT3G18140.1	transducin family protein / WD-40 repeat family protein		similar to transducin family protein / WD-40 repeat family protein [Arabidopsis thaliana] (TAIR:AT2G22040.1); similar to unnamed protein product [Vitis vinifera] (GB:CAO23544.1); contains InterPro domain WD40 repeat-like (InterPro:IPR011046); contains Int	94.59	148	8	0	63	506	1	148	1e-91	302
All.Contig_1189	CAGTCACCAACTCCATCTAACTTGGTATATCGAAGAACCTTTCATCCTCCGTACACTCCGAGTCCAACTTATAGTCCCACTGCCCCTGGCGGTTACAGTTACTCTCAATCTCAGGATGCTATGCACGCCAAGCAACTGCTCTTTGCTAAAATCGCACTCCATTGCTACAATCTCGAAAAGGGGACACACTTTGAACGCTTGGGTCTGCCTCGAGATTATGACCAGACCTTAGAGGCAAGGGATCCAGCACGCAATTACACTTGCAGGTTTGAAACAAATGTTCGGCTTGCCACTGAGAATAAAGATTGCTTCCATGTTGTCACAACCCGCTGCAGGCCCTTGCCCCCACCTCCTCCTCCAGGGGAAGATGGATTCCAATGTGGATTTGACACACTCTCC…	800	2	AT4G20095.3			similar to unknown protein [Arabidopsis thaliana] (TAIR:AT4G29550.1); contains InterPro domain Protein of unknown function DUF626, Arabidopsis thaliana (InterPro:IPR006462)	63.64	11	4	0	750	782	282	292	5e-44	21.9
All.Contig_119	GAATAATTTCAGTTTGAGGACACAATGAAGTTAAGTTTGTGATCTAAGGACTTGAACTGTCTCCAAATCTGCAGGAAGGACTTTTTGATTGGATCAATATAAATACCTTCTTCATTCTCTTCCATCTTCATSACAACCTACACAATACCTCGTTATTTTTTTTTCTTTAATTGCGTATCAGATTCCTAGCATCATGACTGTTCTTGTTGAACATTTCACCTCCGATTCAAGAATCGAGGAAAAGAAAATGAAAGATGAGAGGGATGATGAACTGTTGTGGGATGGAGGTTTASTGGTTCCAAAATCTAAAGAAGCTGATGGATTTGATGCTCCYGATRTCAATTTCTTGGGCCACTCTTTTAGGGATTATGAGAATGGTGCAAGCGAGAGACAGAAAGG…	924	2	AT2G19800.1	MIOX2 (MYO-INOSITOL OXYGENASE 2)	Encodes a myo-inositol oxygenase family gene.	Identical to Inositol oxygenase 2 (MIOX2) [Arabidopsis Thaliana] (GB:O82200;GB:Q8LCN3;GB:Q94JX0); similar to MIOX4 (MYO-INOSITOL OXYGENASE 4) [Arabidopsis thaliana] (TAIR:AT4G26260.1); similar to unnamed protein product [Vitis vinifera] (GB:CAO45773.1);	85.19	243	36	0	194	922	1	243	7e-111	397
All.Contig_1190	GACGACAAAAAAAAAATTAGAAAAGAAGAAAAGAGTTTATCGGGTCTCTCTCACGAGTCACGGCRTCGACGAAACTGGAGGTGAAGCCATCTCCGATCGAGAGTCGCCGTCATCCCTATCCCACTCCTGCAATATCTACTCCGACGYTGTCGTCGTTAATTTCGGCACCTCCTCGCCAAGTCGCCATCGTCCCTGTCGTGTAAGCCCTAGGTCTGATTTGTCTTTCCTTTTAAATCGACGAAATTGAAATTGTGCGAGCTGTCACTGTCCATGCAACGAATAAATACTCTGTGTCTGCATCGCTTTGRCAGTGCTTGGTGCTTCTATGATATGTCCTCCGGTTTATGCTTTGCCCAGATTCGGAAGAAGATGGGTTTGTTCTTGTTGATGTTTCATCTT…	657	2	AT3G56980.1	BHLH039/ORG3 (OBP3-RESPONSIVE GENE 3); DNA binding / transcription factor		similar to BHLH038/ORG2 (OBP3-RESPONSIVE GENE 2), DNA binding / transcription factor [Arabidopsis thaliana] (TAIR:AT3G56970.1); similar to hypothetical protein [Vitis vinifera] (GB:CAN64266.1); contains InterPro domain Achaete-scute transcription factor r	88.89	9	1	0	497	523	247	255	5e-13	23.9
All.Contig_1191	CAGACAGATTTTCACCCTGCCTATGACGCCAATGGGATGATAGAGTTTAACGAGCCCGTGCCTTTCCGCCTCACAAGGAACATGCAMGCGTTCTTMTCTCAGTTTGGRGTCGAAGGTCTTCTCATGTCATCCATGTGTTCAGCAGCTCAAGCWGTTATCTCCTCCAAGCAAAACGACCATCTTCGGTATCAACTGGCTATGTTCTTCCGTGATGAATTGCTGTCRTGGTTTGGAAGAMGACCTCTTGGTATGCCGATTCCTCCYGYTGGAGGGATTGCTACATTGAACTCAGCCGAGYTSAAGGASAAAGTTAACTCCAACGTGAAMGATGTCATTGKCCGGATCAGAGGAATAGCCCCACAGTACTTTTCYGAAGAGGATGAGAACATTGTRGAGCCG…	635	2	AT2G17930.1	FAT domain-containing protein / phosphatidylinositol 3- and 4-kinase family protein		similar to FAT domain-containing protein / phosphatidylinositol 3- and 4-kinase family protein [Arabidopsis thaliana] (TAIR:AT4G36080.1); similar to hypothetical protein OsI_026134 [Oryza sativa (indica cultivar-group)] (GB:EAZ04902.1); similar to unnamed	92.12	165	13	0	1	495	3631	3795	7e-76	280
All.Contig_1192	GCAAACACGATCAACGAGTTCAGAACCCGTCACCTATCTGAACTAACGGAGCTATGTGAAGCAAGCGGAAGCTCGCTGGGGTATGGTTTTTCGAGGACGACGACGACTAAGCCTAAAACTCAAACGTCGGATGCAACTGAGGAGAACCAGATCATCGAAGGAAGTGGTTCACTCGCCATCTGATGTGCCTTTCTTTTTTATTCTGGCAATAACCAAAGAACAACTTTAACATTTTTGTGTTGTGGTGGGTCCTTTTAGAGGGAGATTTATTAAATTACTTGTTCTCCTTTGATCAATATTAGGAGGACGATTGTACTGGTTTGTTGGCACAGTCAGTAATAAAGACAAAACCTTAAAGAACAAAAAAAAAAAAAAAAAAAAAAAAAAAAAAAAAAAAAA…	430	2	AT1G01790.1	KEA1 (K EFFLUX ANTIPORTER 1); potassium:hydrogen antiporter	K efflux antiporter KEA1	similar to KEA2 (K+ efflux antiporter), potassium:hydrogen antiporter [Arabidopsis thaliana] (TAIR:AT4G00630.1); similar to hypothetical protein OsJ_015941 [Oryza sativa (japonica cultivar-group)] (GB:EAZ32458.1); similar to H0124B04.17 [Oryza sativa (ind	83.33	54	9	1	1	162	1137	1188	9e-15	75.9
All.Contig_1193	GGAGACGAAAGCTGCTATGGAGAAGATTGTGAATGTGAGGCTGAGTGCTGCGCAGCCTACTAATGTCCCGAGGCAGTCAGGAGACTCGAAGTTTATTAAGTTTAAGCCTTCTCAGCAGTCTTCGGCTTTTAATTCAGGTGCTAAAGAGAGGATTATTAGGATGGTGGAGATGCCTGTGGATCCTCTTGATCCGCCGAAGTTTAAGCACAAGAGAGTCCCCAAGGCTTCTGGCTCTCCTCCTGTTCCTGTCATGCATTCGCCGCCCAGGCCTGTTACAGTCAAGGACCAGCAAGACTGGAAGATCCCTCCTTGTATCTCTAACTGGAAGAATCCGAAAGGTTACACTATCCCTCTTGATAAACGTCTTGCTGCTGATGGAAGAGGTTTACAAGATGTTCA…	760	2	AT1G77180.2	chromatin protein family		similar to Os02g0759800 [Oryza sativa (japonica cultivar-group)] (GB:NP_001048184.1); similar to unnamed protein product [Vitis vinifera] (GB:CAO65464.1); similar to GAMYB-binding protein [Glycine max] (GB:AAZ38969.1); contains InterPro domain SKIP/SNW; (	90.43	209	20	1	2	628	158	365	1e-85	313
All.Contig_1194	GAGAGAAAGATTTATATAAAAAGTCAGTTTCATTTTGCTCGTCTGKKTTTCGGTTCTGTCTGAACGGCAATCATCATCCTCTCCATTACTCCTGCCATTAAACCTTTCTTGAGAATATTATTTTGTGAACGATGAGAAGCCAACGAGATCAAGACTCCAGGGCTTTCTACGACCTCTCGGCTCTTGTCCTGAGCCTCCTCCGCTCTCCGCCGATGCCGATTTCTCTCCCCGATCACTTCCCGGATTCGCCGATGATGAGGACTCGGTCGCCTTCGATGGCTCATATATCTCCCTCGGGGTTCGCGTCGCTGCTGCTCGGTATCTCCGTGGCTCTGATGCTGTGTGGATCCGTGACTTTCTTCATCGGCTTCCTCTTGTTGCCTTGGGTTCTGGCTCTCA…	607	2	AT1G27290.2			similar to unknown [Populus trichocarpa] (GB:ABK95086.1)	76.22	143	23	3	132	527	2	142	8e-52	199
All.Contig_1195	GGATATACGCTTTCTCTCTCGAACCAAAAAGCAGATCTGATAACGCTCCGGCGTCCGGACGGCGCGTGAGCGCGCGTGCCAGCGCCGGAGGCTTCCTCTTCCTCTAGTATCGCCTCTCTTTTGCTCGACATCCGTCTTTGCCCTGTTACCGCCTTGTCTGTGTCTCTGGTCAGAGGGTTTCTGTTGGTATAGTCACCTGCTCGTGAGGGTGTGTGGCTCCACGGTGAGTCAGTCTGTTCTGGAGGCTCGACGCAGTAGAGAGGAGCAGCTACGGGTGTCGTTGTGTTTCGAACTCTCTGACCGTGTTCAAAGTTTGTGTATTTGTTCATCTGTGTGATTTACTTTCGTTTTGGGAGGAGATTCGCCCTTGCCAAAGAAAGGAAAAGGCTTTCAGATTCA…	1132	2	AT5G65290.2	LMBR1 integral membrane family protein		similar to hypothetical protein OsJ_008168 [Oryza sativa (japonica cultivar-group)] (GB:EAZ24685.1); similar to hypothetical protein OsI_008830 [Oryza sativa (indica cultivar-group)] (GB:EAY87597.1); similar to hypothetical protein OsI_021408 [Oryza sativ	42.86	21	12	0	1052	1114	29	49	3.7	29.6
All.Contig_1196	GATCAAAGAGGAAGGTCTTGGAAGATCAGACAAGCCTGACTGGGTCACAGTCAAAGCAACCATAGCATTCATCAAAACTGATAGCTTCTGCTACACAGCTTGTCCTTTGATGATTGGAGATAAGCAATGCAACAAGAAGGTGACACGGACTGGAACAAACATGTGGCTCTGTGACCGGTGCAACCAAGAGTTTGAGGAATGCGACTACAGATACCTTCTTCAAGTGCAGATTCAAGACCACACTGGGATGGCTTGGGTAACGGCGTTCCAAGAATCCGGTGAAGAAATCATGGGATGTCCGGCTAAGCAGCTTTACACGTTGAAGCACGTATTGCAGAATGATGAGGAATTCGCAGTGATTGTTAGAAACAGACTGTTTCATCAGTACATGTTAAAGTT…	1178	2	AT2G06510.1	replication protein, putative		similar to DNA binding / nucleic acid binding / zinc ion binding [Arabidopsis thaliana] (TAIR:AT4G19130.1); similar to hypothetical protein OsI_008965 [Oryza sativa (indica cultivar-group)] (GB:EAY87732.1); similar to unnamed protein product [Vitis vinife	82.94	170	29	0	2	511	470	639	6e-84	308
All.Contig_1197	GCTGCCGTCGTCAACGTCAACTGGACCCGCAAGGCTGAGAAAGAACCGATCTTATAACCCCGCAAAAGCTTCAGCAAAAGTTCCTCTTGGAAGCTACCCGGTCTCTCATATCACATACGASYYGAATGTCTTAKGCTCCAGGGGACCAAGGAAGATGCAATGCGTGATGGATACAATACCTACAAGTGCAATGGAGCAACCTCGAGGAGTATCATCTTCAGAGCCATCAGAGTTTCCYTACCTCGGTGGTTCTCGGTCAACTTTTTYCAGGTCTCAATCGAAACCACTACGCAGCAGCAGCAGCGGCTTAAGCCACCTGAAAGAGACACCGTTAGTGCTGAGCAACAAGACACCACGGTGGCATGAGCAGCTACGTTGCTGGTGCTTGAACTTCCACGG…	724	3	AT5G18680.1	AtTLP11 (TUBBY LIKE PROTEIN 11); phosphoric diester hydrolase/ transcription factor	Member of TLP family	Identical to Tubby-like F-box protein 11 (TULP11) [Arabidopsis Thaliana] (GB:Q6NPQ1;GB:Q6YNX7); similar to ATTLP9 (TUBBY-LIKE PROTEIN 9), phosphoric diester hydrolase/ protein binding / transcription factor [Arabidopsis thaliana] (TAIR:AT3G06380.1); simi	79.41	204	42	5	17	628	194	389	1e-78	289
All.Contig_1198	GAAGTTGCGTGTTTGGTTATCTTTTCTTTCGTGTAAACCTAAATTAAGGGATTTGTTCTAACAACAAATCTCTCTAGAATCCAAAAGGAAGAATCCCGTCTCTCTCTCTCTCTCTCATCTTCTTCTCGGGAAGATCAGAAAACAGCTTTTTGTGAAATTYCATCCTCAAGCTTTGAAGATCGCAGGAAAATTCTCGTTTTGATCTGACCGTTTCTGGTGAAGAAGACAGGATTCTAAAAGACAACAACAACAACAACAATGAGCTCTGAGCAAAACAACAGCACRAGCTTCCCACCAACAGAGCCAAAGCTCTGCGACAACGGGTGCGGATTCTTCGGGTCACCCTCCAACATGAACCTCTGTTCCAAATGTTRCCGAAGCCTCCGAGCCGAGGAGGAT…	614	2	AT4G12040.2	zinc finger (AN1-like) family protein		Identical to Zinc finger A20 and AN1 domain-containing stress-associated protein 7 (SAP7) [Arabidopsis Thaliana] (GB:Q9SZ69); similar to zinc finger (AN1-like) family protein [Arabidopsis thaliana] (TAIR:AT4G22820.1); similar to zinc finger (AN1-like) fa	77.31	119	26	2	259	612	1	118	1e-46	182
All.Contig_1199	GAAGGAGTCCCTCCTCCTTACGACAAGGTCAAGAGAATGGTCATTCCTGATGCTCTCAAGGTTTTGAGGCTCCAGGCTGGTCACAAGTACTGCTTGTTGGGCCGTCTTTCTTCTGAGGTTGGCTGGAACCACTACGACACCATCAAGGAGCTTGAGGTCAAAAGAAAGGAGAGGTCACAAGCTGTGTATGAGCGTAAGAAGCAGCTCATCAAGCTCAGGACTAAGGCCGAGAAGGTTGCAGAGGAGAAACTTGGAGCCCAGCTCGATGTTCTTGCACCGATTAAGTACTGATAATTCGCATCTGTCTTTTGGTTTAATACTTGCTGCGTTTGTGCTCGTCTCGATTCTACCCTTTGAATTTCGGTTTTGCATTTGGTAGCTTGTAAACGTAAAGATTGG…	441	2	AT3G24830.1	60S ribosomal protein L13A (RPL13aB)		Identical to 60S ribosomal protein L13a-2 (RPL13AB) [Arabidopsis Thaliana] (GB:Q9LRX8;GB:Q8RXI2); similar to 60S ribosomal protein L13A (RPL13aA) [Arabidopsis thaliana] (TAIR:AT3G07110.1); similar to unnamed protein product [Vitis vinifera] (GB:CAO46114.1	94.79	96	5	0	1	288	111	206	2e-47	184
All.Contig_12	GATCAACATTCCGACAAGAAAAAAAAAGAAAAAGATCGTTATGACAGTCAACACAGAAAACATCATTCCGACAAGAACGCATGTCTTGATCTTCCCATTTCCGGCACAAGGTCACATGATTCCCCTCTTCGACCTCACCCACCGTCTCGCTCTCCGCGGCGGCTCCGCCTTAAAAATCACCGTCTTAGTCACTCCAAAGAACCTTCCTTTCCTCTCTCCTCTCCTCTCCGCCGATCTCAACATCGAAGCTCTCACCCTCCCTTTCCCCTCTAACCCTTCCATCCCCTCCGGCGTCGAAAACGTCCAAGACCTACCTCCTTCCGGCTTCCCCACCATGATCCACGCGCTCGGTGGTCTCCACGCGCCGCTTCTCTCTTGGATCACTTCTCACCCTTCTCC…	698	3	AT1G73880.1	UDP-glucoronosyl/UDP-glucosyl transferase family protein		similar to UDP-glucoronosyl/UDP-glucosyl transferase family protein [Arabidopsis thaliana] (TAIR:AT1G51210.1); similar to UDP-glycosyltransferase 89B2 [Stevia rebaudiana] (GB:AAR06921.1); contains InterPro domain UDP-glucuronosyl/UDP-glucosyltransferase;	81.98	222	37	1	41	697	1	222	7e-104	373
All.Contig_120	GAGAGAAAATAATATTCTCGTTCTCCAWCTGCTTTCTCTCATCGGAGCTCTCTTTTTCTGGTTCTCAAGGAACCAAAGGACAAGATTCTGAGCTTGGTGGAGGAGGAGCCTAAAGATGGAAGGAGATGTGTTCTCAGGGTTTGGTGAGAGACACAACATGGATGGCAAACTGCTGCAGAGTTTCCAGAAGAGCTTTGTGGATGTTCAAGACATTTTAGAYCAGAACCGGCTGCTGATCAACGAGATCAATCAGAACCACGAGTCCAAACAGCCTGATAACTTGGGTCGAAACGTCGGTCTGATCAAAGAGCTCAACAACAATATCAGAAGAGTGGCTAGCCTTTACGGCGACCTCTCTCATTCTTTTGCAAGATCGATGGATGCTTCATCAGAAGGTGA…	685	2	no significant hit
All.Contig_1200	GCTCTCTCTTTAATCATATATATATATATATAGTCTTTCGGAGCTTTTTATASGAAGTATCAATGGCTGTTGAAGCTCATCACATGAACATTTTCTCTCCTCAGTTGTTATCAGACAGAGATTGTGTTAAACTCAAACAAGACATGAACCACGGCGAGTTTCATYTCCCCGCCGGCGAAGTTCCGTTTGTAACCGGAGAATCTCTCGCCGTAGATCCTTTAGCTAAAGCTTACTTCAACAAATCAGAAAATGGTCCCACTTATAACTTCAACTCATCCTCTGTTCTTCCTCCGTCCGCAAAACGTCCGAGAGGATCTCAATACCTTGACTCAGACGCTCATTTCGCGTCTCCGGYTAAACGGAGGTCCGGTGCGTTTAGCTTAACCTCATCGTTGATAA…	590	2	AT4G19700.1	protein binding / zinc ion binding		similar to protein binding / zinc ion binding [Arabidopsis thaliana] (TAIR:AT5G45100.1); similar to hypothetical protein [Vitis vinifera] (GB:CAN83796.1); contains InterPro domain Zinc finger, RING-type; (InterPro:IPR001841); contains InterPro domain S-ri	69.1	178	53	4	63	590	1	171	2e-49	192
All.Contig_1201	GGGCCTCCTCGGCTCCGGTCCGCCCCCGCCAGTCGCTGCTCTCTTCTTTCTCGCCTCTCCTCTCCCTCCCTCTTCTTGCTTCCTTTCTCGGTGTTCTGGGGGCTTGCGCCACCGCGGTTCCAGATCTGGTGTTGTCTCTCTTGGAACTCCGGAGAAGCGTGGAGGAGTGGATGTGAGGTTCCTTCGGTCGGGTGTGGTCGTGGARGTCTCGATCTAGCGTCAGATCTGGATTCCGGAAGTAGATCCGTCTCCTTCCTCTGCTTCYTTTACCTTCCGTTCTCGGTGTGGATGAGAAGGCTCACTTGGTTGAAGGCGCTTCTCAGTTACTCCAGACGGTGGCGTTGCGGTGTTTCTCTGCGTGTCTTGGTGTTCTCCGCAGGTGTTCCTTGTTAGACCGGT…	703	2	no significant hit
All.Contig_1202	GGGACAAGGATGAGATACTMGAAAGCGAGTTYTTCGAYACWAGGCAAGCGTTYCTRAGTCTTTGTCAAGGGAACCAYTAYCAGTACGACACGTTGAGGCGGGCAAAACATTCGTCAATGATGGTCCTTTATCATCTGCATAASCCAACTGCTCCWGCSTTTGTCACGAYCTGYAATGCGTGTCACCTCGACATTGAAACTGGTCAAKGCTGGCGCTGTGAAGTRTGTCCAGACTACGATGTGTGYRAYTCMTGTTACMGTAGAGATGGYGGAGTTAATCATCCTCACAAGYTGACYAATCATCCATCYCTAGCTGATCAAAATGCTCAGAACAAAGAAGCRAGGCWRTTGCGTGTCTTGCAGCTKASGAAAATGCTKGAWCTTCTGGTACATGCATCAC…	623	2	AT1G79000.1	HAC1 (P300/CBP ACETYLTRANSFERASE-RELATED PROTEIN 2 GENE); H3/H4 histone acetyltransferase/ transcription cofactor	Homologous to CREB-binding protein, a co-activator of transcription with histone acetyl-transferase activity. No single prior lysine acetylation is sufficient to block HAC1 acetylation of the H3 or H4 peptides, suggesting that HAC1, HAC5, and HAC12 can	Identical to Histone acetyltransferase HAC1 (HAC1) [Arabidopsis Thaliana] (GB:Q9C5X9;GB:O64548); similar to HAC12 (HISTONE ACETYLTRANSFERASE OF THE CBP FAMILY 12), H3/H4 histone acetyltransferase/ transcription cofactor [Arabidopsis thaliana] (TAIR:AT1G1	90.82	207	19	0	3	623	1468	1674	3e-106	380
All.Contig_1203	GGTTGGCAAGTAAGTAAGATACCTCTTTTCTTTCTAATTCGCATCTTTGTTGTTCTCTTTGGAGTACTCTTCCATCTCACCGAGCCAGAGATCAGCAAAGTCGCAATTCTTCCAAGCGTCGAACCAAGGCCCGCCGCGAGTAAAATGCACGGCCTTAGGCTGGGTGGCGGGATCGTTCTCAACGACCCTGTTATGCCCTTCAAGAAAGTTCCAGACGAAAGGAACAGACCCAATCTCCTCATCCTCCAGCCACTGGGAACCTATGGAGGAAGGCACCGCTCTGAGTATTCACAGCCTCAGGGGTCAAAGTCTTGTTCTTCGGGTGGCCGCAGTTGTAAAGCACCATGGAGGACCAGTTCTTCCTCGGGTACACRGTTTGCACGGCGCCGTCCATCTTAG…	926	2	AT1G67370.1	ASY1 (ASYNAPTIC 1); DNA binding	meiotic asynaptic mutant 1 (ASY1). ASY1 protein is initially distributed as numerous foci throughout the chromatin. During early G2, the foci are juxtaposed to the nascent chromosome axes to form a continuous axis associated signal.	similar to ASY2, DNA binding [Arabidopsis thaliana] (TAIR:AT4G32200.1); similar to unnamed protein product [Vitis vinifera] (GB:CAO66172.1); similar to aysnaptic 1 [Brassica oleracea var. alboglabra] (GB:AAN37925.1); contains InterPro domain SWIRM (InterP	29.58	71	49	1	76	285	524	594	2.8	29.6
All.Contig_1204	GGAGGAAGAATCGCGAAGAAGAAGAAGAAGAATCAAAGCATGAGTGGGCATGAAGAGAATCACGATGGCAGCCGGATCTCCACTCCCGCCTCCTCGGATCCCAAAGCTGCTCCTCACTCCTCCGACTACGCTCCTTACCCTAAGCTCGATCCCAACGACGTCACTCCTCCTCCTCCTCCAATCTCCGGCGGTACCGCCACCACCATGCCGCCGGAGTTCAATCCTTACGTCTCTCCTTCCCCTGTCCCCAAGAATACGATGGACTCTGTGAAGGACACGCTCGGGAAATGGGGRAAGATGGCTGCWGACGCCACCAAGAAGGCTCAAGATCTCTCCGGAAACGTTTGGCAGCACTTGAARACAGGTCCAAGTGTRGCTGATGCTGCTGTTTCGCGAATT…	936	2	AT1G28200.1	FIP1 (FH INTERACTING PROTEIN 1)	VirF-interacting protein FIP1	Identical to GEM-like protein 1 (FIP1) [Arabidopsis Thaliana] (GB:Q9SE96); similar to GEM [Arabidopsis thaliana] (TAIR:AT2G22475.1); similar to unnamed protein product [Vitis vinifera] (GB:CAO61640.1); contains InterPro domain GRAM (InterPro:IPR004182)	85.38	260	33	5	40	804	1	259	7e-121	430
All.Contig_1205	GACGGCGGCGACATGGCGATGCGTCTTCCTTTCCCGTCAACGCACCGCCGTATCCCAACGCTTCCGAGCTTCGCCTCTTTCACCCCACGGAGGCGAAATGTTGCGATGGCATCGGCAAAGAGAAGCCCTAAGCGTCTCAAATACTCTACCCCTCGGTTCACAAAGGAGGGGGAGTTTGTGTCAATAGAGGTGGACCCTTCAGGTGCTGATTCGTGGAAACTCGAACCTGTTATTGAGCTTCTCAAACAAGGAGCCGTTGGTGTTATCCCCACTGATACAGTCTATGCAATAGTTTGTGACTGTAAGAACCATTCCGCTGTAGAACGTCTCCGAAGGATTAAAAAGATTGAATCTTCCAAGCCACTTAGTATCTTATGCCGTTCCTTAAGGGACATAGAC…	621	2	AT3G01920.1	yrdC family protein		similar to yrdC protein-related [Arabidopsis thaliana] (TAIR:AT5G60590.2); similar to unknown [Populus trichocarpa x Populus deltoides] (GB:ABK96713.1); contains InterPro domain Sua5/YciO/YrdC/YwlC (InterPro:IPR004388); contains InterPro domain SUA5/yciO/	88.04	209	22	2	4	621	9	216	2e-100	361
All.Contig_1206	CACCGGTAAACGTCTCATTACCACCACCACCACCTCCGGTAAATCAAACTGCGGCACGAAGTTGAAGAAGTCAACGGATATGCTTTTACAAAAATGCAATAGCTTTGCTTCTAAAGCTACAAGAGATTCATGGGATCGTATGTTCGACGAAGCTCGTGGAGCTGATGTTTTGATCCATACAGATGATAATGGCTTGATCTACGCCCATTCTAACGTCATCGGAATGGCTTCAGATGTGATCAGAGGAATGATGAAGCAAGACAAGAAAAAACCTCATCGTAAATCAATCTCAATCCTCGGTGTTCCTCACGATGCTGTCCGCGTTTTCATTCGATTCTTATACTCTTCTTGCTACGAGAAACAAGACATGGAAGACTTCGCAATACATCTTCTTGTACT…	1026	2	AT4G37610.1	BT5 (BTB and TAZ domain protein 5); protein binding / transcription regulator		similar to BT4 (BTB AND TAZ DOMAIN PROTEIN 4), protein binding [Arabidopsis thaliana] (TAIR:AT5G67480.2); similar to BT4 (BTB AND TAZ DOMAIN PROTEIN 4), protein binding / transcription regulator [Arabidopsis thaliana] (TAIR:AT5G67480.1); similar to unname	89.27	289	31	0	62	928	22	310	2e-166	540
All.Contig_1207	GCCGCTTCTTTATGGTACCAGTTGTTGTTTTATTGAATTTGCCTCATTAATAGGCTCCCGATTTGACTTTGATCGTTATGGGCTAGTACCAAGATCAAGTCCTAGACAGGCGGACCTTATTTTAACAGCAGGTACAGTAACAATGAAAATGGCTCCTTCTTTAGTGAGATTATATGAACAAATGCCTGAACCAAAGTATGTTATTGCTATGGGAGCGTGTACAATTACAGGGGGGATGTTCAGTACCGATTCTTATAGTACTGTTCGAGGGGTTGATAAGCTAATTCCTGTAGATGTCTATTTGCCGGGTTGTCCACCTAAACCAGAGGCTGGTTATAGACGCTATAACAAAGCTTCGTAAGAAAATAGCTAGAGAAATCTATAAGGATCGAATTAGAC…	1375	13	ATCG00430.1		Encodes a protein which was originally thought to be part of photosystem II but its wheat homolog was later shown to encode for subunit K of NADH dehydrogenase.	Identical to NAD (ndhK) [Arabidopsis Thaliana] (GB:P56756); similar to NADH-ubiquinone oxidoreductase 20 kDa subunit, mitochondrial [Arabidopsis thaliana] (TAIR:AT5G11770.1); similar to photosystem II G protein [Olimarabidopsis pumila] (GB:YP_001123119.1)	100	110	0	0	2	331	36	145	1e-93	228
All.Contig_1208	CCATAGGGGAGATAGCGTTGTTGGGGACATGGAACCTGTTGCGGAAGTCATAGAAAATCTAGGACAAAGCGGTGAGTTTGCACCGGACCAAGGCGTTACTGATGATTTTGTTCCTGAAGAAATGGACCGGGAAGGTAGGCTCGGGGATATTCAGGATAGGGTGTCTCAGTCCGTTGCAAGGGCGGACAGTGGCTCTAAAATCGTTGATTCATTGAAGGCTGAGTCTGTTGAAAGCGGCGAAAAGATGAGCAACGTAAATGCGTTGATGAACGAAGATAGTGTTCACCCATCATTGTCGTGCAATGCCATTGTGTGTTCTGGTTTTGAAGCATCTAAAGAAGAAGTGACCCAGACGTGGAACGAGTCTCCGCTCAACGCCGGCTTTGCACTCCCTGGATC…	694	2	AT1G17210.1	zinc ion binding		similar to zinc ion binding [Arabidopsis thaliana] (TAIR:AT1G48950.1); similar to hypothetical protein [Vitis vinifera] (GB:CAN80628.1); similar to unnamed protein product [Vitis vinifera] (GB:CAO40356.1); similar to expressed protein [Oryza sativa (japon	91.34	231	20	1	2	694	713	942	7e-117	416
All.Contig_1209	GAACCCAGATTACAAATGAACAAATTCAAACTTGAAAAAGTCTCTTTCTGATTCTCGAAGAATGAGGGGCAAAGAGATTGATCGAGAAAGATCTCTTGTTCTTATTATAAGATCGTGTGATTGGACCCGCAGATGTTTGGTAAAAAGAATAATCTTATCCTTTGAGAATAATCAAAAATAGAAAGTGTTCAATTGGAACATGAAAACGTGACCGAGTTTATCCTAGTTACTCTTCGGGACGGAGGAGATTCGCGAACGAGGAAAGGGACCCAATGACTTCGAAAGAATTGAACGAGGAGCCGTATGAGGTGAAAATCTCATGTCCGGTTCTGTAGAGTGGCAGTAAGGGTGACTTATCTGTCAACTTTTCCACTATCACCCCCAAAAAACCAAACTCTG…	1064	2	ATCG00900.1		encodes a chloroplast ribosomal protein S7, a constituent of the small subunit of the ribosomal complex	Identical to Chloroplast 30S ribosomal protein S7 (rps7-B) [Arabidopsis Thaliana] (GB:P61841;GB:P56800;GB:Q9XQ95); similar to ribosomal protein S7 [Eucalyptus globulus subsp. globulus] (GB:YP_636344.1); contains InterPro domain Ribosomal protein S7, bacte	98.43	127	2	0	683	1063	1	127	3e-64	242
All.Contig_121	GAGAAGACTTGGGTGTAAAAATGTCGACGGTGGTAGATCGGAGTGTATCGACGCTGAACCCAAACGCGCCGGCGTTCGATCCGGTGGGATTCCGTGAGGTAGAGGATTTCTCTCCCAAGTGGTGGGAGCTGGTGACAACATCCAAGTGGTTCCGTGACTTCTGGCTCAGTGCCAACTCGGAGGAGTATGAGTTCGGCGATATGGAGGACGAGTTCGAGGAGCTAATCATGACGTCATCCGGTGAGAATGAGATGGGTGGATCTTCAGTGAGAGAATCAGATGTTGGGAGGTACTTGAAGGCGCTTCTGAGCATGGCGGAGTCTACGAAAGGGAAGCTTTACAGATCTAATGTGTCTTGTTCTGCCAAGTATAACCAGAAGAGGATGAACCCGAACTTCT…	690	3	AT4G14270.1		Protein containing PAM2 motif which mediates interaction with the PABC domain of polyadenyl binding proteins.	similar to ERD15 (EARLY RESPONSIVE TO DEHYDRATION 15) [Arabidopsis thaliana] (TAIR:AT2G41430.2); similar to ERD15 (EARLY RESPONSIVE TO DEHYDRATION 15) [Arabidopsis thaliana] (TAIR:AT2G41430.4); similar to ERD15 (EARLY RESPONSIVE TO DEHYDRATION 15) [Arabid	67.59	145	40	4	21	434	1	143	7e-50	193
All.Contig_1210	GACCAAAACCCTAATCTCTCCCAAAGCTTCTCTCCCAAAACGAAATGGTTGACCCTAAAGTTTACTTCGACATGACCGTTGGCGACAAAGCCGCCGGCCGCATCGTCGTGGAGCTTCACGCCGACACAGTCCCCGAGACGGCCGAGAACTTCCGTGCCCTCTGCACCGGCGAGAAAGGAATCGGCAAATCCGGAAAGCCGCTCCACTACAAGGGCGCGGCTTTCCACCGCGTGATCCCCAGGTTCATGTGCCAGGGAGGAGATTTCACCGCCGGGAACGGAACCGGAGGAGAGTCGATCTACGGCATGAAGTTCAAAGACGAGAACTTTGTCAAGAATCACACCGGTCCGGGTATTCTCTCCATGGCCAACGCTGGTTCGAACACGAACGGATCTCAGT…	756	3	AT2G16600.1	ROC3 (rotamase CyP 3); peptidyl-prolyl cis-trans isomerase	Encodes cytosolic cyclophilin ROC3.	Identical to Peptidyl-prolyl cis-trans isomerase CYP19-1 (CYP19-1) [Arabidopsis Thaliana] (GB:Q38900); similar to peptidyl-prolyl cis-trans isomerase / cyclophilin (CYP2) / rotamase [Arabidopsis thaliana] (TAIR:AT2G21130.1); similar to cyclophilin [Thell	85.21	169	25	0	51	557	4	172	7e-76	280
All.Contig_1211	GAGGACCGACAAATCGTGAGTTTTCTCTCTCTTGTTCCTAGAGAGAGATTTCTCTCTCGACCTCTCCCTTTACCAATACAAGATCATTCAGAGGGAAGGTTTCGAGATTAGCTCCTATGTTTTGTTGTAATATATTCGATCCAAGGATCGATTTTTTTGTTTTCCGTCAGCGGATCTAAATTTCGCGTARGCGATTTTTGTGGTGATTTCAACCCTAAACTGATCCGTTCTTCATCTTCTCTTCTTTTATCAGTTTTGTGGTTGAACTTTAATAAATTCGCGTTGGCGATATGTGTTTTCTTCCATCTTCTCTTTCGCAATAAATTGTTACATCCTGTTTGCTTGTGTTGGATGCTCTGTTTCTCCAGGGATATGCACTTAATCCTTTGTTGCGAGAGT…	547	2	AT5G02910.1	F-box family protein		Identical to F-box/LRR-repeat protein At5g02910 [Arabidopsis Thaliana] (GB:Q9LYZ4;GB:Q8LG97); similar to F-box family protein [Arabidopsis thaliana] (TAIR:AT3G28410.1); similar to hypothetical protein [Vitis vinifera] (GB:CAN83117.1); contains InterPro do	47.62	21	11	0	266	328	37	57	5.9	27.3
All.Contig_1212	GGAAACTTGGGCGGCGACTAAAGATTGCTGAGAAGACACGTTGTCTCCGTGAGAGAGAAAGAGTTGCTTTTCTTCTATCTTCTTAAGTCTCTTCTCGTTCTAAATTTGATTACTTTTCCTTCTAATGGCGGAAGCAACAATCAGCAGAACGAATCTGATCTTCCGAGGAGCTCGTTGACTCTCTAACCAACGCTGGTGATAAGCTTGTTGTGGTTGACTTCTTCTCTCCTGGCTGTGGTGGATGCAAGGCTCTTCATCCTAAGATATGTCAGTTGGCAGAGCAGAACCCTGATGTGCAGTTTCTTCAAGTGAACTACGAGGAGCACAAGTCCATGTGTTACAGTCTYGGTGTCCAYGTYCTCCCGTTTTTCAGATTCTACCGTGGCGCTCATGGTCGTG…	969	2	AT1G08570.2	thioredoxin family protein		Identical to Thioredoxin-like 1 [Arabidopsis Thaliana] (GB:O64654); similar to thioredoxin family protein [Arabidopsis thaliana] (TAIR:AT2G33270.1); similar to Thioredoxin domain 2; Thioredoxin fold [Medicago truncatula] (GB:ABN09825.1); contains InterPro	78.49	186	38	2	126	677	60	244	7e-68	254
All.Contig_1213	GAACCAAAGGATAACACACACAAAMAAAATCAAGACTCTCACTAAGATAAACCAAGAATCTTCATCATGGCTTCAGTAACCTCAGCTACCGTCGCAATCCCATCCTTCACCGGCCTAAAATCCACAATCTCCAAACCCTCCGCCGTCGTCAGACTCCCCACCACAACATCACGGAACCTCACCGTGAAGGCATCTCTCAAGGACTTCGGAGTCGCGGCTGTTGCAGCTGCAGCTTCCATCGCTTTGGCTGGAAACGCCATGGCCATCGATGTTCTCTTGGGATCAGGAGATGGAGCGTTGGCTTTCGTTCCCAACGAGTTCACAATAGCCAAAGGAGAGAAGATTGTGTTCAAGAACAATGCTGGATTCCCCCACAACGTTGTGTTCGATGAGGACGAG…	725	4	AT1G20340.1	DRT112 (DNA-damage-repair/toleration protein 112); copper ion binding / electron carrier	recombination and DNA-damage resistance protein (DRT112)	Identical to Plastocyanin major isoform, chloroplast precursor (DRT112) [Arabidopsis Thaliana] (GB:P42699;GB:Q9LN26); similar to plastocyanin [Arabidopsis thaliana] (TAIR:AT1G76100.1); similar to Plastocyanin, chloroplast precursor (GB:P00289); contains	84.43	167	24	1	67	561	1	167	6e-64	240
All.Contig_1214	GATGATGGAAGAACCAGCCGTCCCCCCGGCGTTAAGGCATCAAAAGCCGGTGGGAAGAAGGCAGWGGTGGATGGCAAGGACGTTGCTAAGTATCAKACGATGTGGACGATCAGGAAGCAGGATTTGGAGATAAAGGAAAGGATGTCCAAGATGAAGCTACTGGAGAAACTATATGAAAAAACAGAACCGCTACTAGAGTTTGAGGAAGCGCTGAAKCTGAAACTCATAACTGAGTTGATGTGAGTTGATGTCTAATTAGTTAAGTGTTAAGATGTCAAGTGTTCGTTTCAGTTGTGCGTTAAGTTTCAGTGTGAAAATGTTGTGTGATGTTAAAATGCTTTTGTGGTTCTCATATGTTCTGTGATGTTAAATTTAATGGTGGTGTTATTATGTTTCCAA…	698	2	AT4G08270.1			similar to DNA binding [Arabidopsis thaliana] (TAIR:AT3G47680.1); similar to hypothetical protein 24.t00018 [Brassica oleracea] (GB:ABD64940.1)	51.72	29	14	0	97	183	57	85	0.074	34.3
All.Contig_1215	GGGCTGCGATGATCGGATTCCACCTCTCCGGCTACAAACCAATCTCCTTCTCGAACTCTCTCCACTCAAAACTCTCTCTCCTATCTCTCAACCCCTCTCCGCAACCGCGAAAATCAACCGTCATCCGTATGGGCGGCGGCCCAAGAACCTTTCCGGGCGGCGTCTCAAAGTGGCAGTGGAAGAGGATGCAAGCGAAGAAGCAGAAACAGCTCCTCAAAGCGCGGTTATCCCGTGAACGCCAGATCTACGAGATGCGTAAACGCGCCGAGCTAAAAGCTGCGGTGGCTGAGCTTGAGAGACCGTGGGAACCGGTTCAGAAACCGCCGAATCTCTTCTCGGTTTGCGCCGACGAGCAGGTTAAGGTTTTAGCGGACCGGTTTCAGAAACCGGGCGGGTTTG…	610	2	AT2G37920.1	EMB1513 (EMBRYO DEFECTIVE 1513); copper ion transmembrane transporter		similar to DEAD box RNA helicase, putative [Arabidopsis thaliana] (TAIR:AT2G07750.1); similar to hypothetical protein [Vitis vinifera] (GB:CAN73407.1)	83.83	167	22	2	102	587	41	207	1e-62	235
All.Contig_1216	GGAGAAAGAGCAGACTAATAAAGTATTGGCAAGTTATTGTCAAAGCATTCACATGAGATCCTCAATGTTGGAAAGGCGATTAACATGTACAACGACAAGAAGGAGAAAAAGAAGTCAGGAAGATCAGACAAGTTGAAAGCTAAGAAWGACATCACCAAGAAGARGCCTTATGCCAACAAAGCCAATTGAAGAGTCTCTCTCCACCTTGTTTTATTTACTTGGTCGCTTATCTCATAACAACAAATAGTTTTTACAAATTTTGTGTGTTCTTATCTGTTAAGGGAATAMTCTTATATTTTATGTTCTATTTTAATCTTTTCGAACACGAARARWWARAAGAGCAATCTTCTTAATCATTTAAAGAAGAGAAGATCAGTAAGCAAACT	386	2	AT2G37990.1	ribosome biogenesis regulatory protein (RRS1) family protein		Identical to Ribosome biogenesis regulatory protein homolog [Arabidopsis Thaliana] (GB:Q9SH88;GB:Q56WN3;GB:Q8LA50); similar to unnamed protein product [Vitis vinifera] (GB:CAO39739.1); contains InterPro domain Ribosomal biogenesis regulatory protein; (Int	82.61	23	4	0	25	93	267	289	2e-05	44.7
All.Contig_1217	AAGCAGTGGTATCAACGCAGAGTGGCCATTACGGCCGGGAAGCAGTGGTATCAACGCAGAGTGGCCATTACGGCCGGGGGYTCGACGTCGACCGGCTCTCGTTTCTTCTCACCGTCGCTTGCTAAAACATGGTGCTCGATGCTTATGCTTCGTCAAACCCTAATCAGGTACACGAGGACGTTCTTCAGAAATCTAGAGATGCTTGCTACAAGGCAAGAGATGCTTTTTACACTTGTCTGGAGAAGGAATCTGGTAAGAAACCCACTGAGATTGCCTCCGTAGGTCTTCTCTACCCTAAAGAGTGCAGCCTTTCCAGAACCGAGTTCGTTAAGAGCTGCCGCTCTTCCTGGGTGAAGCATTTCGATAGGGAGTACTGTCGGAACAAGAGAGTGCAAAGGC…	713	3	AT5G58005.2			similar to unnamed protein product [Vitis vinifera] (GB:CAO66690.1)	90.52	116	11	0	129	476	1	116	2e-59	225
All.Contig_1218	GACATTACGTAGAGCTTCTTCTCTCCATCGAATCCAGCAACGACGACGATGATGATCTCTCGTCGATTAGCTTCCAGATTCCTTARACCCACGTCTTCCTCATCCCTCATCACCTCCCTTCACCATCTCCACTCTTCTTCTCCCATAAGAAACCATTTGATCCACAGATCAGAACAACTTCAAGAGCTGGGTCTCTTTAGATCCTTCTCTGCTTTCATCACCAATCCCAACACCGAGAAGCTCCGATCTCAGACACGGTCAACGAGGTACTTCTCAACACCAAGCCAAGAGGTCAGTCCGAAACCAGAGGAGGAGYCCAAGATGAAGCACCAGGAGATCGAAGGCCCGACGGTGGAGCGCGACGTGTCGGCTTTAGGTAACGAGACGAGAAAAGTGTTC…	690	2	AT3G12650.1			similar to unnamed protein product [Vitis vinifera] (GB:CAO15069.1)	72.4	221	54	4	49	690	1	216	2e-64	241
All.Contig_1219	GGAGACATTGACGTAACAAACSGTCCACCGTCTTCCTCCTCCTACTCCTTGTCTCCGCCAGCATGCCCCCTTCCTCCTCCTMCTCMTCATCCCTCCACCCYTGCAAGCATTCCCCGTCAGCAACTCTCGACCTCCTAATCCTAATCCTCGTCCTCTTCTCCGGCGCATTCYTCATCTCCTCCTACTTCTCMTACCTAATCCACTCCTTGYCCCTCCTCTCCTCTCATTTCCCATCGATCGCCCTCTCTCTCTCCTCTCYCCCTYTCCCTCTKATCCTCCTCTTCTCCGATCACGACCACGATCCCGACGATGAAGATCACGACGGAATCTCTCTGGCGTCGTTCTTGTTCGTGTTCGCGGTCTTCTTCGCTGCCTCGGTCGCGTTCCTCGACCTGTGCT…	565	2	AT5G19020.1	pentatricopeptide (PPR) repeat-containing protein		similar to pentatricopeptide (PPR) repeat-containing protein [Arabidopsis thaliana] (TAIR:AT2G22070.1); similar to unnamed protein product [Vitis vinifera] (GB:CAO71087.1); similar to Tetratricopeptide-like helical [Medicago truncatula] (GB:ABN09753.1); c	87.93	58	7	0	390	563	143	200	2e-26	115
All.Contig_122	GCAGAGATTGTGGTGAACGATACCATCGTCTTGCCTATGTTTCAGCAGCATTGCAGGCGGAAATCACTTCCAGAGTTTTGGCGAGATCGTCCTGTACCAGCTGAAGGTTGGAAGGAACACAACTGTATACCTGATGAGCACTACGTTCAGACACTGCTAGCTCAAAAGGGTGTCGATAGCGAACTCACAAGACGGTCATTAACACACTCAGCTTGGGACCTTACTTCAACTAAAAGTAATGAACGTCGTGGATGGCATCCTATGACTTACAAGTTTTCCGATGCTACTCCTCACCTCATACAGTCTATTAAGGGAATCGACAATATCAACTATGAGACGGAATACAGGCGAGAATGGTGTACTAGTAAAGGGAAACCGGCACCGTGTTTCCTCTTTGCA…	739	2	AT5G14550.1			similar to unknown protein [Arabidopsis thaliana] (TAIR:AT1G62305.1); similar to unnamed protein product [Vitis vinifera] (GB:CAO14725.1); contains InterPro domain Protein of unknown function DUF266, plant (InterPro:IPR004949)	92.72	151	11	0	1	453	219	369	2e-82	301
All.Contig_1220	GGACTGGGGATCGATCGAGTGAGTGATAGAGAGTGAAACAAACAAACAAACAAAAAGAAGAAGATGCCGTGCCTTAACATCTCCACCAACGTTAGCCTCGACGGCGTCGATACCTCTTCCATCCTCTCCGAAGCTACCTCCTCCGTCGCTAAAATCATCGGCAAGCCTGAGAACTATGTGATGATTGTGTTGAAAGGATCAGTGCCAATGGCATTTGGTGGCACCGAGGACCCTGCCGCTTATGGTGAACTTGTCTCCATCGGTGGCCTTAACCCCGATGTCAACAAGCAGCTCAGCGCTGCGGTCTCCGCCATCCTTGAGACTAAGCTCTCTGTCCCCAAGTCTCGCTTCTTCCTCAAGTTTTACGACACCAAGGCCCATCAAAGTCAAGAATATGCA…	566	1	no significant hit
All.Contig_1221	GGCGTTTTAGTATATAAAAACTCTCTCTTTCTTCCTTCCTCAAACCCAATCGTATCTACAACAATAATGGCGATTGCTTTCAAATCCGGCGTCTGCTTCCTCCACTCCCCAAAACCCCAAGTCGGAATCCGCCACTCTTCTCCCGATTCCTCCCTCTCTTTCAAGAGATTGGCTCCCATCGCTGCCCTCTCCACCTCTTCTCCCACCCTCGGTCTCGCTGATACTTTCAAGGAGCTCAAAAAACAAGGCAAAGTAGCATTCATACCTTACATCACAGCTGGTGATCCAGATCTCTCTACCACCGCAGAAGCATTGAAAGTTCTCGACGCTTGTGGTTCCGACATTATCGAACTGGGTGTTCCTTACTTTGACCCTTTAGCTGATGGACCCGTTATTCAG…	598	2	AT3G54640.1	TSA1 (TRYPTOPHAN SYNTHASE ALPHA CHAIN); tryptophan synthase	Catalyzes the conversion of indole-3-glycerolphosphate to indole, the penultimate reaction in the biosynthesis of tryptophan. Functions as a heterocomplex with tryptophan synthase beta subunit (TSA2).	similar to tryptophan synthase, alpha subunit, putative [Arabidopsis thaliana] (TAIR:AT4G02610.1); similar to tryptophan synthase, alpha subunit (TSA1) [Isatis tinctoria] (GB:CAH56477.1); contains InterPro domain Ribulose-phosphate binding barrel; (InterP	87.64	178	21	1	67	597	1	178	2e-84	308
All.Contig_1222	TAATAGAGCTGTGGCATGATTGCAACGTTTCCATGGCACATAGAAGTTACTTCTTCCTTCTCTTCAGAGGAGATCAGAAAGATTGCTTGTACATGGAAGTAGAACTCCGTAGGCTCAAGTACATCAGAGAAACMTTTACCAACAATACCAAAACTATCGAAAACGGACGCACTCTTACATCAATGTCCAGCTTGAGGGCGTTGAACAGGGAGAGGTACAAGCTGAGTCAGCTGATGCAGAAGAAACTGAGCAAAGAAGAGAGAGAGAACCTGTTCTTGAGATGGGGCATTGGGCTGAACACAAAGCACAGGAGGCTTCAGCTGGCGCATCGTCTATGGTCAGAGAACAAAGACATGGAGCATGTCCGAGAGAGCGCCTCTGTTGTGGGGAAGCTAATGG…	646	2	AT3G51150.1	kinesin motor family protein		similar to kinesin motor family protein [Arabidopsis thaliana] (TAIR:AT5G66310.1); similar to hypothetical protein [Thellungiella halophila] (GB:ABB45845.1); similar to hypothetical protein [Vitis vinifera] (GB:CAN75924.1); similar to unnamed protein prod	91.23	171	15	0	3	515	855	1025	1e-80	295
All.Contig_1223	GATTGWTTSTTTCTGATGGTGCARACAGATACAGATCRRASAATGRGTCTTRATTTGAATCTGTAYTCTTTAGCAAAACCCTTRTCTCAATTTCTCAACGATGTGWCYAAAATCAAAGACAATCATTCAAAACTGTTTGAAATMGATGAATATGTCGGAAAAWTGGAGGAAGAGAGGAAGAAGATCGATGTTTTCAAACGTGAACTCCCTCTATGCATGCTCTTGATGAACGAAGCGATTGAGAGGTTGAAGGRAGAGGCTTCATCAGTAAWACTGGAAATTGATAATAAGAAGAACTGGRTGAACTCTGCCCAGTTATGGATCTCGAACACTAACTCCCAGTTGCCATCRACAAACGGAGAAGAAGACCGGTGTGTGACTCAGACYTGTAGTAATAAT…	781	2	AT4G37180.1	myb family transcription factor	myb family transcription factor, contains Pfam domain, PF00249: Myb-like DNA-binding domain l; also isolated as a putative cytoskeletal protein in a yeast screen	similar to myb family transcription factor [Arabidopsis thaliana] (TAIR:AT2G03500.1); similar to hypothetical protein [Vitis vinifera] (GB:CAN83122.1); contains InterPro domain Homeodomain-related; (InterPro:IPR012287); contains InterPro domain Homeodomai	56.31	309	81	10	16	780	1	306	4e-74	274
All.Contig_1224	GAAGAGAGGAGAGGAAGAAAGCGTAAGAAGGAATCGYAGAGGAAGAAAGCATGATCCTCGCCGTRTTGTTCGCTAATTCCGTAGGGAACGTTTTGATCGAAAGGTTCAAYGGAGTGCCRGCTGAGGAACGTCTCACCTGGCGATCTTTCTTGGTTAAGTTGGGAGCTGAGAATCTCAAAGGTGTTAAGAACGAGGAGCTCCTCGTTGCGTGCCACAAGTCGGTTTATATCGTGTATACCATGTTAGGGGATGTTAGCATCTTCCTTGTTGGTAAAGACGAGTACGACGAACTTGCTTTGGCAGAAGCCATCTTTATCATAACAGGGGCTGTGAAAGACATATGCGGGAAACCTCCTACAGAGCGGGTGTTTTTGGACAAATACGGAAGGATTTGTTTGT…	755	3	AT1G15370.1			similar to unnamed protein product [Vitis vinifera] (GB:CAO62746.1); contains InterPro domain Longin-like; (InterPro:IPR011012)	95.89	146	6	0	51	488	1	146	5e-77	284
All.Contig_1225	GAGGGCCGTGCTTGTCAAAGGGAGGTGCTGCACGCGGAGCCTCCACACCGGCGAGGAGGCTCTCGTTGCAGCGCCATAGCGGAAGCCTAAGCTCTTCAGGTCTCGCCAGAGAACCGTCGGATCAATCCGATAACGGCGGTGGGAAGATGAAGGGTCTATTCAAGTCCAAGCCTCGCACTCCTGCTGACATCGTCCGTCAGACCCGTGATCTCCTTCTCTACGCTGATCGATCCAAGTCTTTGCCTGACCTCCGTGAATCCAAACGCGAAGAAAAGATGGCGGAGCTAAGCAGGAACATCCGTGATATGAAGTCTATTCTCTATGGAAACAGCGAGGCCGAGCCTGTGGCTGAAGCTTGTGCTCAATTGACTCAAGAGTTCTTTAGAGAAGATACTCTAC…	524	2	AT5G47540.1	Mo25 family protein		Identical to Putative MO25-like protein At5g47540 [Arabidopsis Thaliana] (GB:Q9FGK3); similar to Mo25 family protein [Arabidopsis thaliana] (TAIR:AT4G17270.1); similar to MO25 protein -related [Brassica oleracea] (GB:ABD64974.1); contains InterPro domain	93.65	126	8	0	147	524	1	126	2e-62	234
All.Contig_1226	GGTCCATCTTCTGACCAGATCATTTGTCTTAAACATAAACAGGACGTGTTCAAGTGTCAGATATTTCGAGAAGAAGAAGAAGAGATGGAGAGGGAGCCGACAAGAGTGATGGTGGCTGTGAATGAATCGACGATCAAAGGGAAGCCCCACCCTTCGATAAGCAGCAAAAGAGCTTTCGAATGGACTCTGGAGAAGATGATCCGATCCAACACATCCGATTTCAAGATTCTCTTGCTCCATGTACATGTGGTCGACGAAGACGGTTTTGATGAGGTAGACAGCATATATGCCTCTCCCGATGATTTCAAAGAGTCTAACAAGTCTAAAGGTCTTCACCTTCTCGAGTTTTTCGTTAAAAAATGTCATGAGATTGGGGTTAGTTGCGAGGCATGGATCAAG…	817	2	AT3G01520.1	universal stress protein (USP) family protein		Identical to Universal stress protein A-like protein [Arabidopsis Thaliana] (GB:Q8LGG8;GB:Q940U0;GB:Q9SSA2); similar to universal stress protein (USP) family protein [Arabidopsis thaliana] (TAIR:AT5G14680.1); similar to universal stress protein family pro	84.21	171	24	1	97	600	5	175	1e-80	296
All.Contig_1227	GGAATCTCTTCTCCCTCAACCCTAATCTAGGGTTACTCTCTCTCTCTCTCTCCCTCTCGCTCGCTCCGTCCTCTGTTCTTCGTTCTGCCGATTTGCGCGAGCATTAGCTTCCTTTAAGCTTGAGTGCGTTGGGGAGAACAAACAGTTGAGCGAAGATGAGGATTATGATCAAGGGAGGTGTGTGGAAGAACACCGAAGATGAGATCCTCAAAGCCGCCGTCATGAAGTACGGTAAGAACCAATGGGCTCGGATCTCCTCTCTTCTCGTTCGTAAGTCCGCCAAACGGTGTAAAGCTCGTTGGTACGAGTGGCTCGATCCTTCAATCAAAAAGACTGAATGGACCAGAGAAGAGGATGAGAAGCTTCTACATCTCGCGAAGCTTTTGCCTACTCAGTGGA…	1301	2	AT1G09770.1	ATCDC5 (ARABIDOPSIS THALIANA HOMOLOG OF CDC5); DNA binding / transcription factor	Member of MYB3R- and R2R3- type MYB- encoding genes. Essential for plant innate immunity. Interacts with MOS4 and PRL1.	similar to MYB3R-5 (myb domain protein 3R-5), DNA binding / transcription factor [Arabidopsis thaliana] (TAIR:AT5G02320.1); similar to unnamed protein product [Vitis vinifera] (GB:CAO65067.1); similar to CDC5-like protein [Solanum lycopersicum] (GB:ABU495	96.6	382	13	0	156	1301	1	382	0	701
All.Contig_1228	GGATCGCAGCAAAAGAAAAATTCAAGATGGCTCTCGAAGTCTGCGTGAAAGCCGCCGTTGGTGCCCCTGATGTTCTTGGCGACTGCCCGTTCAGCCAAAGGGTTCTTCTCACCCTCGAGGAGAAGAGTCTGCCCTACAAAATGCATCTGATCAACCTCTCCGACAAACCTAAATGGTTCTTAGACATTAGTCCTGGAGGGAAAGTACCAGTGCTTAAGATCGACGGCAAGTGGGTGCCTGATTCCGACGTCATCGTCAGCCTTCTTGAGAAGAAGTATCCTGAGCCATCACTCAAAACTCCTCCTAAGTTTGCCTCTGTTGGATCCAAGATCATGAGTACTTTCGTGGCTTTCCTGACGACCAAAAACTCAAGTGACGGTCCTTTGCTTCATGAGCTAG…	749	3	AT1G19570.1	DHAR1 (DEHYDROASCORBATE REDUCTASE); glutathione dehydrogenase (ascorbate)		similar to DHAR2, glutathione dehydrogenase (ascorbate) [Arabidopsis thaliana] (TAIR:AT1G75270.1); similar to unknown [Populus trichocarpa] (GB:ABK93121.1); contains InterPro domain Thioredoxin-like fold (InterPro:IPR012336); contains InterPro domain Glut	80.19	212	39	1	27	653	1	212	5e-87	317
All.Contig_1229	GATATATTTCTTTAATAATTTTTTATTAATAGTTTGTGATCTCTCAGGAAGGAAGGAAGGGGAAGCCACTCTCTCTCTCAATTACTCCGTCCCTCTTTGATCAATCTCTCTACGTAAAAAGCACGAACCTTTAAACCCGGTCCTGTTCTGTCCGCACAAAGCATTAAGATTACCCTCCTTTTGTCCGTATCCTCTCTCTCTCTCTATGGGCAACGTGAACGCGAGAGACGAAGCGAACAGTGACCACAACAACAACAATGCATCTCCACTGGAAGACAACGACGGTGAGATTCACTCTCGCCATCATCATCAACCCATGTCTTCCGACACGGCTCCTCCTCCTCCTCCTGAGCTCATGGGCCAATCTCCTCCTCAATCCCCTCGCGCCACTCAATCTCC…	1268	2	AT4G16360.1	5'-AMP-activated protein kinase beta-2 subunit, putative		Identical to SNF1-related protein kinase regulatory subunit beta-2 (KINB2) [Arabidopsis Thaliana] (GB:Q9SCY5;GB:O23481); similar to 5'-AMP-activated protein kinase beta-2 subunit, putative [Arabidopsis thaliana] (TAIR:AT5G21170.1); similar to AKIN beta2	77.93	299	64	2	320	1210	4	259	9e-118	420
All.Contig_123	GTSATCGCTTCCCTCAAATCTCTCAAAAACAAATCAAAAAGATGTCGACGAAGAAGATTGTGTTGAAGAGCTCCGACGACGAGTCTTTCGAGGTTGACGAGGCCGTGGCTCGCGAGTCTCAGACCCTAGCTCACATGGTCGAAGACGACTGCACCGACAACGGCATCCCTCTTCCCAACGTCACCGGCAAGATCCTCGCCAAGGTCATCGAGTATTGCAAGAAGCACGTCGACGCCGCTGCTGCCAAGACAGAGGCCACCGCCGATGGTGGGCGCTCCCTCCGACGAGGACCTCAAGGCTTGGGATGCCGAGTTCATGAATATCGATCAAGCTACCCTCTTCGAACTCATCCTGGCTGCTAACTATCTGAACATCAAGARCCTTCTTGACCTTACGTGC…	751	2	AT1G75950.1	SKP1 (ARABIDOPSIS SKP1 HOMOLOGUE); ubiquitin-protein ligase	SKP1 is core component of the SCF family of E3 ubiquitin ligases and serves to tether the rest of the complex to an F-box protein, which provides specificity in binding to ubiquitin ligase substrate proteins. Predominately expressed from leptotene to pa	Identical to SKP1-like protein 1A (SKP1A) [Arabidopsis Thaliana] (GB:Q39255;GB:P92992); similar to ASK2 (ARABIDOPSIS SKP1-LIKE 2), ubiquitin-protein ligase [Arabidopsis thaliana] (TAIR:AT5G42190.1); similar to kinetochore protein [Brassica juncea] (GB:BA	90.48	84	8	0	274	525	77	160	1e-60	137
All.Contig_1230	GAGCGTGTCTGTCACCACTTTACCACTTATCAAAGCTTCCCAAGCTGTGTAAAATTCTCTCCACAATCCACAATCACTTCCAAATAACTTCAAGAAGATGGGTAAGGAAGACAATCAAGGAGAAGAGTACCTCTTCAAGATTGTCCTAATCGGCGACTCCGCGGTCGGAAAATCGAACCTCCTGTCTCGATTCTCTCGTGACGAGTTCGACACCAACTCGAAGGCGACAATCGGAGTGGAGTTCCAGACGCAGCTGGTGGAGATCGAAGGGAAAGAGGTGAAAGCTCAGATCTGGGACACTGCTGGTCAGGAGAGGTTTAGAGCAGTCACTTCTGCTTATTACAGAGGTGCTTTTGGTGCTCTCATTGTCTACGACATCACCAGAAGCTCCACTTTCGA…	751	2	AT3G07410.1	AtRABA5b (Arabidopsis Rab GTPase homolog A5b); GTP binding		similar to ARA4 (Arabidopsis Rab GTPase homolog A5c), GTP binding [Arabidopsis thaliana] (TAIR:AT2G43130.1); similar to GTP-binding protein [Pisum sativum] (GB:BAA02108.1); contains InterPro domain Rab11-related (InterPro:IPR015595); contains InterPro dom	94.01	217	9	1	98	736	1	217	8e-103	369
All.Contig_1231	GAAGACTTCTCGATACTCACACACACGCAAAGAGGRAKACGAGAAAGAATGGGCGTTGTKAAGTCAGCGATTGGKGATATGCTGATGACCTTCTCCTGGGTTGTCCTCTCCGCGACGTTCGGTTTACAGACGACGGAGATCATCTCCGCCGCCGRTTTTCAGGGAATCGCTTGGGCTCCGTTGGCCATCACCACGTTTCTGATTTTCGTCTACGTTTCCATTTTCACCGTTGTCTTCGGTAGTTCTAGCTTTAACCCTACCGGAAACGCCGCCTTTTATGCCGCCGGTGTCCCCGGAGATACTCCTTTTCACCTTGGCGATCAGGTTACCTGCTCAGGCAGCTGGTGCGGCAGGAGGTGCATTGGCCATCATGGAGTTCATACCAGAGAAGTACAAGCA…	815	3	AT3G04090.1	SIP1;1 (SMALL AND BASIC INTRINSIC PROTEIN 1A)	Belongs to a family of plant aquaporins. Similar to yeast and radish aquaporins. Located on ER.	Identical to Aquaporin SIP1-1 (SIP1-1) [Arabidopsis Thaliana] (GB:Q9M8W5;GB:Q0WWC3); similar to SIP1,2 (SMALL AND BASIC INTRINSIC PROTEIN1B) [Arabidopsis thaliana] (TAIR:AT5G18290.1); similar to small basic intrinsic protein 1 [Vitis vinifera] (GB:ABD467	93.33	120	8	0	368	727	108	227	1e-83	182
All.Contig_1232	GACACASAGACAGATAAGTGTTTCCCAGAGAGAAGAGAGAGAGAGAGAGAGACAAGTCGCAATGGCGTCTGTAGCTTCTTCAACCACTCTCRTCTCCTCCTCCGCTAGTGTTCTCCCAGCCAYCAAGTCTTCGCTTCTTCCATCTCCCTCCCTCTCTTTCCTTCCAACCCTCTCCTCTCCTTCCCCATCCGCTTCTCTCCGGYTCSCTCGTCCCTCTCCCCTCACCTCAATCCGCTCCWCTTCTCGCCGGAGCTTCGCTGTCAAGGCCCAAACCGATGATCTTCCATTGGTTGGAAACAAGGCGCCTGATTTTGAGGCAGAGGCTGTGTTCGATCAGGAGTTCATCAAGGTYAAGCTCTCTGAGTACATTGGGAAGAAGTATGTGATTCTCTTTTTCTA…	722	2	AT3G11630.1	2-cys peroxiredoxin, chloroplast (BAS1)	Encodes a 2-Cys peroxiredoxin (2-Cys PrxA) that contains two catalytic Cys residues.	Identical to 2-Cys peroxiredoxin BAS1, chloroplast precursor (BAS1) [Arabidopsis Thaliana] (GB:Q96291;GB:P92938;GB:Q8L5U1;GB:Q9S7Y0); similar to 2-cys peroxiredoxin, chloroplast, putative [Arabidopsis thaliana] (TAIR:AT5G06290.1); similar to 2-Cys peroxi	94.58	166	9	0	224	721	53	218	2e-86	315
All.Contig_1233	GACGAAAAATCAAATCTTCSGTGAACCCAAAAATGTCACGTCTCCCGATCCTAATCGCCGCCTTCCTCCTCMTCYTCCTCRCCRCCGCMACCGCMGAATCAGACTCCCCGACGGCGTACTCCCTCCTCCAGAGCTACAACTTCCCCGTCGGAATCCTCCCAAAAGGAGTCGTCGCTTACGATCTCGACACGTCRACAGGCAAGTTCCACGCCTACTTCAACGGCTCGTGCAGCTTCTCCCTCGTGGGCTCKTACCAGTTGAACTACAAATCGACGATCAGCGGCTACATCTCCGAGAACAAGCTCACGAAGCTGAGCGGCATCAAGGTGAAAGTCCTCTTCTTGTGGCTCAACATCGTCGAGGTCGTTAGGARSGGAGAGGAGATGGCGTTTTCCGTTG…	657	2	AT4G02370.1			similar to unknown protein [Arabidopsis thaliana] (TAIR:AT1G02816.1); similar to unnamed protein product [Vitis vinifera] (GB:CAO40037.1); similar to hypothetical protein [Vitis vinifera] (GB:CAN69598.1); contains InterPro domain Protein of unknown functi	84.56	136	21	0	93	500	25	160	3e-64	241
All.Contig_1234	GACATGCAAAACAAAACAAAATAATGGATAAAAGATGGAGTCTTCAAGGCATGACTGCTCTTGTAACTGGTGGAGCCAGCGGAATCGGGTTCGTTTTTCTACTCTCTAGCAATATCATTATCATATCTTTTCCCATAGCTACGTCCTCTTTTCTATGTAATGTCGATAACCTTTTGTTAAATTGAGGACTGTTCTAGGCATGCCATAGTAGAAGAGCTAGCTAGTTTTGGAGCTATAATCCATGTATGTGACATATCCGAAACACTGCTCAATAAAAGTTTAAGCATATGGGAAAAGAAAGGGTTTCAAKTGAGCRGTTCAATATGTGATGTATCCTCTCGTCCCGARAGAGAAACACTRATGCAAACCGTCTCAAAGATGTTCGATGGCAAGCTGAGY…	1113	3	AT2G29330.1	TRI (TROPINONE REDUCTASE); oxidoreductase		similar to tropinone reductase, putative / tropine dehydrogenase, putative [Arabidopsis thaliana] (TAIR:AT2G30670.1); similar to hypothetical protein [Vitis vinifera] (GB:CAN63543.1); similar to tropinone reductase [Cochlearia officinalis] (GB:CAO02390.1)	95.45	22	1	0	24	89	1	22	4e-103	47.4
All.Contig_1235	GCGTCTCATGATGTACCAGCAAGGCTGCTTCGCAGGCGGCACTGTCCTCCGTCTCGCCAAGGACCTCGCAGAGAACAACCGCGGCGCACGTGTCCTCGTTGTCTGCTCCGAGATCACAGCCGTCACCTTCCGCGGCCCCTCTGACACACATCTTGACTCCCTTGTAGGACAGGCTCTCTTCAGTGACGGCGCTGCAGCACTCATTGTTGGCTCCGACCCTGATGCATCCGTGGGAGAGAAGCCAATCTTTGAGATGGTGTCTGCAGCTCAGACCATCCTCCCGGACTCGGATGGAGCCATAGATGGACACTTGAGGGAAGTRGGACTCACCTTCCATCTCCTCAAGGACGTCCCTGGGCTCATCTCCAAGAACATAGAGAAGAGTCTTGAAGAAGCGTT…	755	2	AT5G13930.1	ATCHS/CHS/TT4 (CHALCONE SYNTHASE); naringenin-chalcone synthase	Encodes chalcone synthase (CHS), a key enzyme involved in the biosynthesis of flavonoids. Required for the accumulation of purple anthocyanins in leaves and stems. Also involved in the regulation of auxin transport and the modulation of root gravitropism	Identical to Chalcone synthase (CHS) [Arabidopsis Thaliana] (GB:P13114;GB:Q43132;GB:Q940L6;GB:Q941R9); similar to chalcone and stilbene synthase family protein [Arabidopsis thaliana] (TAIR:AT4G34850.1); similar to chalcone synthase [Arabidopsis halleri]	96.4	222	8	0	2	667	161	382	2e-120	428
All.Contig_1236	GGATCACTCATTCAGTTTGTGGCTGTACGTTAAATCCTCGAGAGAGAGAGAGAAATTAAAGGTTTTTAATCTTTAATACAATGTCAAAAAAAGCATCAGGCATATTGCTTGATCTGGAATCACAAGAAAGCTGTGGCTCTCCTTCATTTATGTCACATACCCCTTCCAAGGATCCACAACCAACCTCCGGCGATGACGACGGCGGAGATGTTGGGAGGATTCCGTTAGAAGAATGGTTACCGATCACAGAATCAAGAGAAGGAAATGTTTTCACGGCAACGTTTCATCTTCTCTGTTCGGGACTTGGTTTCCAAGTGCTTCTTCTTCCTGCAGCTTTCGCAGCACTCGGATGGGTATGGGGAATAATAATATTAACGGTGGCATTTGCATGGAAGCCCT…	1566	3	AT4G35180.1	LHT7 (LYS/HIS TRANSPORTER 7); amino acid transmembrane transporter		similar to amino acid transporter family protein [Arabidopsis thaliana] (TAIR:AT1G47670.1); similar to unnamed protein product [Vitis vinifera] (GB:CAO47496.1); contains InterPro domain Amino acid transporter, transmembrane (InterPro:IPR013057)	74.34	339	87	1	93	1109	4	341	0	519
All.Contig_1237	GAGGAAAGAGATTGATTCAAATTAAATCATCATTCATCCTACAAATCTTATTTCTTCTTCCCCGGTCAACAATCAGAATCTGGGTTTTTGCAAAAAGATGCTAACTTCCAAAGTGCTGTTCACAGTTCAAACATAGCTGGAACCGTGAGCTCGAAAGAAAAATAAGAAAACATGCGTATTTTGTGCGATGCCTGTKAGAGCGCCGCCGCGATAGTCTTCTGCGCCGCCGACGAAGCTGCCCTCTGTTGCTCCTGCGACGAAAAAGTTCATATGTGCAACAAGCTAGCTAGCCGACATGTCCGTGTAGGTTTGGCTGATCCCAGCAATGGCGCCAAGCTGTGACATATGCGAAAATGCACCTGCCTTCTTTTACTGTGAGATAGACGGTACTTCTCTTTG…	897	3	AT2G21320.1	zinc finger (B-box type) family protein		similar to zinc finger (B-box type) family protein [Arabidopsis thaliana] (TAIR:AT4G38960.1); similar to unnamed protein product [Vitis vinifera] (GB:CAO47249.1); contains InterPro domain Zinc finger, B-box; (InterPro:IPR000315); contains InterPro domain	85.83	127	16	2	320	694	50	170	1e-85	228
All.Contig_1238	GGGATTTATCTAGCAAGGCATGTTTGAAAGTCTTCTCGCATAGTGACTACGTGACGTGCATCCAGTTTAATCCCGTGGACGACAATTACTTCATCAGTGGATCATTGGATGCAAAAGTTCGAATATGGAGCATTCCTGATCATCAAGTTGTTGATTGGAAGGATCTTCATGAGATGGTAACAGCTGCTTGCTACACACCGGATGGTCAGGGTGCTTTGGTTGGTTCTTACAAGGGGACTTGCTGCTTATACAACACAAGTGATAACAGACTGCAGCAGAGAAAGGAAATCAATTTGAAGAACAAGAAAAAGAAATCCAATCACAAGAAAATCACTGGTTTTCAGTTTGTGGCGGGAAGTTCATCGGAAGTGCTTGTCACATCTGCAGATTCACGTGCGC…	942	2	AT5G54200.1	WD-40 repeat family protein		similar to WD-40 repeat family protein [Arabidopsis thaliana] (TAIR:AT3G15470.1); similar to OSJNBa0074L08.11 [Oryza sativa (japonica cultivar-group)] (GB:CAE02139.2); similar to unnamed protein product [Vitis vinifera] (GB:CAO39239.1); contains InterPro	86.71	316	39	1	3	941	495	810	1e-133	473
All.Contig_1239	GAGAGAAACTAAAAAGAAGAGAAAGGGTGGAATCGAGAAAGAMKAAGATGGTSAGGAGGAATGKAGACKARSAAGAACRAGTTSATAKAGGATTGGKGATCCKCCAGGGAGAATCTCGAGCATAACTTCCGATGGACACGTCGCAACTTCARCTCTCATCGGAATCTTCGGCATCGCTCTCCCCATCCTCGTCTACAAGGKYKTCGTCAAAKATTTCCATATGCAAGACSAAGATGCAGGCAGACCACRTASAAAGTTCCTATAAGGTTCTTTGCRRCACCACTCTCTGCACTGTCAAACTATCAAGAARCTGATGCTAGAACCCAGTTTTCTGCAGWTTATTCAKAATAAAAGAAGGAACGTCTGAAGGATTATATTTTCTGTTTCAAAATGTTCATT…	448	2	AT2G31490.1			similar to unknown [Populus trichocarpa] (GB:ABK96039.1)	80	35	7	0	155	259	36	70	2e-20	59.7
All.Contig_124	AAGCAGTGGTATCAACGCAGAGTGGCCATTACGGCCGGGAAGCAGTGGTATCAACGCAGAGTGGCCATTACGGCCGGGGGTGTCGAATCGAATTGGGCGATAGGGTTTCTTCATCAATCTCTGGGGAGACGACGAAGATGGTGTGCGATAAGTGTGAGAAGAAGTTATCAAAGGTGATAGTTCCAGATAAGTGGAAGGATGGTGCTCGTAATGTWACCGAAGGTGGTGGCCGCAAGATCAACGAGAACAAACTTCTCTCCAAGAAGAACAGATGGACACCTTAYGGTACTGCTACCACSAAGTGCACGATCTGCAAGCAGCAAGTGCATCAAGATGGTAAATATTGTCACACATGTGCCTATAGCAAAGGAGTGTGTGCCATGTGCGGGAAGCAAGTGT…	643	8	AT1G61780.1	postsynaptic protein-related		similar to unnamed protein product [Vitis vinifera] (GB:CAO69687.1); contains domain PTHR11800 (PTHR11800); contains domain PTHR11800:SF1 (PTHR11800:SF1)	95.92	98	4	0	138	431	1	98	4e-54	207
All.Contig_1240	GAGACCACAGCAAAAATGGATAGTCACAAAAGGAGTTTGGGTTTCATATCTCTCGCTTTTCTCTTCATCACTTGCTCTTCTGCTGAGTTCCTCATTCAACAGGTCACAGAAGGCAAAGGAACAGAGAACAACAGTTCTTACAATGTCGAGGCGAATCTTGGAGAGACAAGAGCGTTTAGAGAGGAGCGACCATCAAGTAAGATAGTGACAATAGCAGGCTACTCGGTGATTAAAGGGAGATTCGAACCCTACGAATCCTCTGTTTTCGAAGCAGCTGGTTACAGATGGAGATTGGTTTTGTACGTGATTGGTAATAAAAACGACGGTGGAGCTGGCCATATATCACTTTACGTGAGGATGGAAGAGACCGACTCTCTTCCCTATGGTTGGGAAGTCGAT…	1236	3	AT5G26280.1	meprin and TRAF homology domain-containing protein / MATH domain-containing protein		similar to meprin and TRAF homology domain-containing protein / MATH domain-containing protein [Arabidopsis thaliana] (TAIR:AT5G26300.1); similar to unknown [Populus trichocarpa] (GB:ABK94833.1); contains InterPro domain MATH (InterPro:IPR002083); contain	81.42	339	63	0	16	1032	1	339	1e-159	559
All.Contig_1241	GATTCATTCTATTCGCGTGGTTTCGACGACGAAGAAGGAACAACGCATAACGATGGGTGAAGCCGTGAAGGACGGAAGAGAAGAAGTGATTCAGGCTTGGTACATGGATGATAGCCAAGATGATCAGCGACTTCCTCACCACAAGGATCCTAAAGAGTTTATCTCTCTCGACAAACTTGCAGAGCTTGGAGTCCTTAGCTGGAGACTTGATGCTGATAACTACGAAACCGATGAGGAGTTGAAAAAGATCCGCGAGTCTCGTGGTTACTCCTACATGGACTTTTGTGAGGTATGCCCAGAGAAACTTCCAAATTACGAAGAGAAAGTAAAGAGCTTCTTCGAGGAACATCTCCACACTGATGAAGAGATCCGTTACTGCGTTGCAGGAAGTGGCTACTT…	1320	4	AT4G14710.2	ATARD2; metal ion binding		Identical to 1,2-dihydroxy-3-keto-5-methylthiopentene dioxygenase 3 (ARD3) [Arabidopsis Thaliana] (GB:Q8W108;GB:O23327;GB:Q2V3I4); similar to ATARD1, acireductone dioxygenase [iron(II)-requiring]/ metal ion binding [Arabidopsis thaliana] (TAIR:AT4G14716.	96.28	188	7	0	53	616	1	188	2e-109	393
All.Contig_1242	CGAGGTTGTTGCTTGATGACTTGAAGAAATCTGATTACCCTTCAAAGCGTCTCATCATTGTCGGATCCATTACAGGGAACACAAATACATTGGCTGGTAACGTACCACCAAAAGCTAACCTCGGCGACTTGAGAGGTTTAGCAGGCGGCTTGAACGGTTTGAACAGCTCGGCGATGATTGATGGAGGAGATTTCGATGGTGCAAAGGCTTACAAAGACACCAAGGTCTGTAACATGTTGACGATGCAAGAGTTTCACAGGCGTTACCATGAAGAAACAGGAATCACATTTGCCTCGCTTTACCCTGGTTGCATCGCCTCTACTGGCTTATTCAGAGAGCACATTCCGCTTTTCCGTACACTCTTCCCTCCGTTTCAGAAGTACATCACTAAAGGATATG…	776	2	AT4G27440.2	PORB (PROTOCHLOROPHYLLIDE OXIDOREDUCTASE B); oxidoreductase/ protochlorophyllide reductase	light-dependent NADPH:protochlorophyllide oxidoreductase B	Identical to Protochlorophyllide reductase B, chloroplast precursor (PORB) [Arabidopsis Thaliana] (GB:P21218;GB:Q42537); similar to PORA (Protochlorophyllide reductase A), oxidoreductase/ protochlorophyllide reductase [Arabidopsis thaliana] (TAIR:AT5G541	96.92	195	6	0	3	587	207	401	6e-96	347
All.Contig_1243	GAGGGTTSTCACTCCAAAAGCGATCGATCGATCTATCTGAATCATCATCTCGTTTCCGTTTCAATTGGTAGGGTTTTTGAATCGACGAGAAGAGATGGGTCAGATCCAGTACTCTGACAAATACTTCGACGATACTTTCGAGTACAGGCACGTCGTGCTTCCTCCTGACACCGCTAAGCTTCTTCCCAAGAATCGTCTTCTCTCCGAAAATGAGTGGCGTGCGATAGGAGTGCAGCAGAGCCGTGGATGGGTCCATTACGCCATTCATCGTCCAGAGCCACACATCATGCTCTTCAGGAGGACTCTCAATTACCAGCAGCAGCAGCAGGAGAACCATGCTCAAAACGTCCTCGCTAAGTGATTCTGAGTTGTGTGCTACAAAAAACATTGGCTGTTGTT…	546	2	AT2G27960.1	CKS1/CKS1AT (CDK-SUBUNIT 1); cyclin-dependent protein kinase/ protein binding	catalytic subunit of cyclin dependent kinase 1. physically interact with cyclin-dependent kinases (CDKs) and play an essential, but yet not entirely resolved, role in the regulation of the cell cycle	Identical to Cyclin-dependent kinases regulatory subunit 1 (CKS1) [Arabidopsis Thaliana] (GB:O23249); similar to CKS2 (CDK-SUBUNIT 2), cyclin-dependent protein kinase [Arabidopsis thaliana] (TAIR:AT2G27970.1); similar to hypothetical protein [Ipomoea tri	89.77	88	9	1	95	358	1	87	1e-39	159
All.Contig_1244	GAAAKCTCTTCAACAAAATATCAAAAACTAAATAGAGAGAAGAAAAATGGCGAGAGGGAAGATCCAGATCAAGAGGATAGAGAACCAGACAAACCGACAAGTGACGTATTCCAAGAGAAGAAATGGTTTGTTCAAGAAAGCTCACGAGCTCACGGTTTTGTGTGATGCTAGAGTTTCGATTATCATGTTCTCTAGTTCCAACAAGCTTCATGAGTTTATCAGCCCTAACACCACAACGAAGGAGATCATAGATCTGTACCAAACAGTTTCTGATGTTGATGTTTGGAGCGCTCACTATGAGAGAATGCAAGAAACCAAGAGGAGATTGTTGGAGACGAACAGAAATCTCCGGACTCAGATTAAACAGAGGCTAGGTGAGTGTTTAGACGAGCTTGATAT…	715	2	AT3G54340.1	AP3 (APETALA 3); DNA binding / transcription factor	Floral homeotic gene encoding a MADS domain protein homologous to SRF transcription factors. Specifies petal and stamen identities. Associates with PISTILLATA.	Identical to Floral homeotic protein APETALA 3 (AP3) [Arabidopsis Thaliana] (GB:Q9SQ18;GB:Q9SQ19;GB:Q9SQ20;GB:Q9SQ21;GB:Q9SQ22;GB:Q9SX13); similar to AGL71, transcription factor [Arabidopsis thaliana] (TAIR:AT5G51870.1); similar to apetala3 [Arabidopsis l	90.04	231	15	1	47	715	1	231	4e-98	353
All.Contig_1245	GGAGCTAACATCCTCGCTGGTGGAGCTTTCAGCGGAGCCTCCATGAACCCAGCCGTCGCTTTCGGACCAGCCGTCGTGAGCTGGTCATGGAGTAACCACTGGATTTACTGGGTTGGTCCTCTTGTCGGTGGCGGGCTCGCCGGAATCATCTACGACTTTGTTTACATCATCGAAAACGGTCACGAGCAATTGCCCACCACTGATTACTGAAGACGCTGAAAATTACTGTTGTAATATGATTTGTTTTTATTTCGCATCGTAATTGAATTTCTATGTGGCCGTTGGRTCTTCTTTTTAGATGAATCCTTGTCCGTTGATGTATGTTGTRTTTGGGTTTGTTGTTGGAGTTGTAATTTTCCTTGAAGGCTTTTTAGACGAATGTGAATTATGCATGCTTCT…	418	2	AT3G26520.1	TIP2 (TONOPLAST INTRINSIC PROTEIN 2); water channel	gamma tonoplast intrinsic protein 2 (TIP2). expressed throughout the plant and transcript level is increased upon NaCl or ABA treatments. NaCl stress-sensitive yeast mutant strains exhibit more resistance to salt when expressing this protein.	Identical to Aquaporin TIP1-2 (TIP1-2) [Arabidopsis Thaliana] (GB:Q41963;GB:O23117;GB:O82446;GB:Q9LRV6); similar to GAMMA-TIP (Tonoplast intrinsic protein (TIP) gamma), water channel [Arabidopsis thaliana] (TAIR:AT2G36830.1); similar to tonoplast intrins	88.41	69	8	0	1	207	185	253	3e-34	140
All.Contig_1246	AAGAACGGTGAGCTTCAGCTAGCTCTGAGGTACACTTGCATCTCCTTTGTTAACATGATGGCTCAGTACGGAAGACCGTTGTTGCCCAAAATGCATTATGTTCAACCGATACCAGTCAGGCATATCGACTTGCTTAGGCATCAGGCGATGCAAATAGTTGCAACAAGACTATCAAGGTCCGAGCCACCGCTGGACGGGAGGTTGTGGAGTACATGCTTGATGTGGACTACCATATGTTCAGTCTCAGGAGAAGCAAAGCCAATTTCAGCAGAATCATGTCGCTTCTCTCCTCGGTCACTCTGGTCTGCAAGTGGTTCAACGATATCTGCACATGGAGAAACCCAATCACAACATGCCTCGTCCATGTTCTGTTCCTGATTCTCGTCTGCTACCCAGAAC…	871	2	AT1G22610.1	C2 domain-containing protein		similar to C2 domain-containing protein [Arabidopsis thaliana] (TAIR:AT1G51570.1); similar to C2 domain-containing protein [Arabidopsis thaliana] (TAIR:AT5G12970.1); similar to C2 domain-containing protein [Arabidopsis thaliana] (TAIR:AT3G57880.1); simila	95.31	64	3	0	1	192	739	802	1e-160	129
All.Contig_1247	GAAGAAGAGATAGAGAAGAAAAAAAGCTTCGGTCAAGAAAAAAAAAGAGAGAGAAAAAATGGCTAAGGGTTTATCTAAACGTATCTTCACGTTTCTGATGTTGATCTCGTTAGTAGCGCTGGCGCTGAACCTTCTAGCCAACGTAGAGGCTCAGAATAAGAAGAAGCCAAGGAGAGATGTTCCTATAGTGAAAGGTCTCTCATGGAGCTTTTACCAGAAAGCATGTCCGAAAGTGGAAAAAATCATCAGGAAAGAGCTCAAGAGAGTATTCAAGAGAGACATTGGTTTAGCCGCAGCCATCCTTCGTATACATTTCCATGACTGCTTCGTTCAGGGATGTGAAGGTTCAGTGCTGCTAGATGGATCAGCGAGTGGACCAGGAGAACAATCATCGATCCC…	1244	2	AT1G71695.1	peroxidase 12 (PER12) (P12) (PRXR6)		Identical to Peroxidase 12 precursor (PER12) [Arabidopsis Thaliana] (GB:Q96520;GB:Q43734); similar to peroxidase, putative [Arabidopsis thaliana] (TAIR:AT4G08770.1); similar to peroxidase [Nicotiana tabacum] (GB:AAK52084.1); contains InterPro domain Plan	82.48	137	24	1	74	484	6	139	8e-167	204
All.Contig_1248	GAAGACGGACGTGAGTTCTGTTCTGTCTCTTCTTKAATCAATTCRCTGTGACTATGGCCTCGCGTTTATTATCGACGACACTCATCACACCGCCGGCAAATSTCAACAAATCGTCGTCGRSTCTAACGGSGAGAGTGAGGTTGAGAAAGGGAAGGCTTAGTATCAGGGCAGTAAGCGGCAGCTCTCAAGGAGGTTCCGTAGATGGAACCGTGTACAAAGGCGTTTATGGTCCCTGGACCGTTGAGCARTCTGATGTCAAAGAGGTTATTTTGTACAGATCAGGACTGGTAACTGCTGCTGCTTCCTTTGTAGCCGCTTCTTCTGCCGCCTTTTTACCGGAGAACTCATGGTTGAGTGAAATAATCAAGCAAAACCAGGACTTGTTCTACCTTGTTGGTG…	1054	4	AT1G28140.1			similar to unnamed protein product [Vitis vinifera] (GB:CAO68697.1)	81.14	281	52	2	54	893	1	280	1e-111	399
All.Contig_1249	GATATACGTAGTAGAGTTCCAAACCATTCTCTCTSATCGCACGGTGAAACCAGMCCCACCTCATTCTCGAATTCCTCTGATCTTTCACCGWCGGTCATCGCCGCCACGCAGATGCTCGCTTGAGTCCGACCTCTTCTCACAAACAACGAGATCTGTTTTCCACGGTTAGGGGAGGATGTCGACTCCAGCAAGGAAGAGGTTGATGAGGGATTTCAAGAGGTTGCAGCAAGACCCACCTGCTGGAATCAGCGGTGCTCCWCARGAYAAYAATATCATGCTCTGGAAYGCTGTCATATTCGGGCCTGATGACACCCCATGGGATGGAGGTACTTTCAAACTCTCACTGCAGTTCTCTGAAGATTATCCTAATAAGCCACCAACAGTTCGTTTTGTGTCAAG…	799	2	AT1G14400.2	UBC1 (UBIQUITIN CARRIER PROTEIN 1); ubiquitin-protein ligase	ubiquitin carrier protein	Identical to Ubiquitin-conjugating enzyme E2-17 kDa 1 (UBC1) [Arabidopsis Thaliana] (GB:P25865); similar to ATUBC2 (UBIQUITING-CONJUGATING ENZYME 2), ubiquitin-protein ligase [Arabidopsis thaliana] (TAIR:AT2G02760.1); similar to ubiquitin carrier-like pr	100	152	0	0	176	631	1	152	1e-87	319
All.Contig_125	GACATTTTCAATTTCTAAAGATCTCTTTGACAACAAAGAAGAAGAAAGAAACGCCCCCAAGAGCCATCACGAATCCTTCCTCCTGCATTTTCTGGGGTTTTGGTGGTGTTGTTAAGAGATCATAATGTCTAGCGTAGAGGATTTGAAAGCTAATGAAGCAGAAAAGTCAATGCCATCACCACAGCAGGAGGAGGCTGCTGTAAAGAGCAAGTATGGAGGGCTCATGCCAAAGAAACCACCTCTCATTTCCAAGGATCATGAGCGAGCTTACTTTGACTCAGCTGATTGGGCTCTTGGAAAGCAAGGTGTTGCCAAACCAAAGGGACCTCTTGAAGCTCTTCGTCCCAAGTTACAGCCAACGCAGCAGCAGACACGTTACAGGAAGTCTCCATGTGCTCC…	651	4	AT5G64130.1			similar to unknown protein [Arabidopsis thaliana] (TAIR:AT1G69510.2); similar to unknown protein [Arabidopsis thaliana] (TAIR:AT1G69510.1); similar to unknown protein [Arabidopsis thaliana] (TAIR:AT1G69510.3); similar to hypothetical protein [Vitis vinife	88.78	98	6	1	125	403	1	98	2e-44	175
All.Contig_1250	GGTGGTCGCCGGGTTTGACGATTTGGTATTCACCGGATCAGCCGACGGAACGTTGAAAGTTTGGAAACGTGAGCTCCAAGGGAAAGAGACCAAGAAGCATGTTTTGGTACACGTGTTGATGAAACAAGAGAGCGCCGTAACGGCGTTAGCCGTTAATTTAAACGACGCTGTGGTTTATTGCGGATCATCTGACGGTTCCGTTAACTTTTGGGAACGGAAAAAATATTTGACTCACGGCGGGACAATTCAAGGTCATCGAATGGCGGTGCTATGCCTCACCTCCGCCGGGAGTCTGTTATTGAGCGGCGGAGCTGATAATAATATCTGCCTTTGGAGGAGAAACGGCGACGGATCTCACACGTGTCTTTCTGTTTTGATGGATCACGACGGACCTGTTAA…	979	3	AT1G49450.1	transducin family protein / WD-40 repeat family protein		similar to transducin family protein / WD-40 repeat family protein [Arabidopsis thaliana] (TAIR:AT3G18950.1); similar to unnamed protein product [Vitis vinifera] (GB:CAO47693.1); contains InterPro domain WD40 repeat-like (InterPro:IPR011046); contains Int	82.22	180	28	2	2	529	293	471	3e-69	258
All.Contig_1251	GGACGTTCGGATTGAAATTTTAGGGTTGGAGAATGACGATGAACTCGCTTCCAAGGAGGTTCGGGAGAGATCAAGGATACCTAGACCGAGACCACCGTAGAGGGAGGAGATCCGGTTCAGACTCCGACGAAGAGCTGAAAGGATTGAGTCACGAGGAGTACCGGAGGCTTAAACGCCTCAAGATGAGGAAATCTGGTAAGCACTGCATTTGGAGGAACACGCCGAGTCYGCCTAGAGATCCSAACGAGGTGGAGTCCGATGAGAACKCCGCCGACGAGGAGGTTCYGGAGAAGGACGAGGWAGATCCGAAATCTGAGTCTGGTAAGTCGGAATCTGAGTCTGATAGATCTAGGAAGAAGAGAAAGAGTAAGAGCTCTAGGAGTAAGCGTAGTAGACGAT…	662	2	AT4G02720.1			similar to unnamed protein product [Vitis vinifera] (GB:CAO22538.1); similar to predicted protein [Physcomitrella patens subsp. patens] (GB:EDQ68232.1); contains InterPro domain Protein of unknown function DUF926 (InterPro:IPR009269)	81.71	82	15	2	33	278	1	80	2e-22	102
All.Contig_1252	TGTTTCGGGATTCTGTGCTGCGGCTTGCAGTCTTCCATTCGACTTTGTCAAGACTCAGATCCAGAAAATGCAACCGGACGCTCAGGGTAAATATCCATACACGGGTTCGCTAGACTGTGCCATGCAGACCTTAAAATCAGGAGGACCTCTGAAATTCTACACAGGTTTCCCTGTGTACTGCGTCAGGATCGCGCCTCACGTCATGATGACATGGATCTTCCTGAACCAGATTACAAAGTTCCAAAAGACCATTGGTATGTGATCTTCAAACCATCCTTGTGAAGTGCGGAGCCAATAATAAGACGAGAAGAACGAAAACACAATTGGAATTGTGTTCTTTTACCTTTTTAACAATATACATATGCCTTGAAGCATTATTTGAGACTTAGATATTTTTTT…	480	2	AT5G19760.1	dicarboxylate/tricarboxylate carrier (DTC)		similar to mitochondrial substrate carrier family protein [Arabidopsis thaliana] (TAIR:AT2G22500.1); similar to oxoglutarate malate translocator [Solanum tuberosum] (GB:CAA68164.1); similar to dicarboxylate/tricarboxylate carrier [Nicotiana tabacum] (GB:C	95.35	86	4	0	2	259	213	298	2e-45	177
All.Contig_1253	GGAAGAAGATGATCGCAACGCAAGAAGAGATGGTCGCAGCAAAAGTACCGCTCGGTTACAGAGACCAGTGCGCGCATCTCCTGATTCCGCTCAACAAATGTCGCCAGGCAGAGTTTTTCCTCCCGTGGAAGTGCGAGGACGAGCGCCACGTGTACGAGAAGTGCGAGTACGAGCTCGTCATGGAGAGGATGCTCGCGATGCAGAAGATCCGCGAGGAAGAAGCCAAAGCCAAACAGAATAAGCTTCAAGGGAACGGCGTTCCTCTCATCCCTAAGACCGCTAATGCTTAGGCCTTAGATTTCGATCTCCGGTTAACCTAACCGATTCCAGATTTCCGGGATTCTCTGGAACTGTGAAGAAGGTGGGGGACTCTACTTTTCAATATTTTCTTCTTGCTAG…	489	1	AT2G02050.1	NADH-ubiquinone oxidoreductase B18 subunit, putative		similar to hypothetical protein [Vitis vinifera] (GB:CAN63291.1); contains InterPro domain NADH-ubiquinone oxidoreductase B18 subunit; (InterPro:IPR008698)	89.58	96	9	1	3	287	8	103	2e-44	174
All.Contig_1254	CATTTCGAGATCTTCGAACATATTAGAGGGTTCAATGTGACTATTGTCACTTCGGCCAACACACAAGATGAGACTTTACTACTGTGGAGCGGCTTTTTGCAAAAAGATGAGGGGGAAACTCAGTAAGATGTCGGAGAAGCAAAATAGTAGAGATCACAAACGTAGAYTGCTCGCGGCTAAATTTGAATTGRGACGAAAGCTTTATAAAGCCTTTTGTAAAGATCCCGATCTTCCTAGTGATATGCGGGACAAAYATCGTTATAAGTTGTCCAAGTTGCCAAGAAATAGTTCCTTTGCACGAGTAAGAAACCGATGTATTTCCACGGGTCGCCCTCGTTCTGTATCTGAGTTCTTTCGAATTTATCGTATCGTTTTTCGTGGATTAGCATCTCGAGGTTC…	672	2	AT2G34520.1	RPS14 (MITOCHONDRIAL RIBOSOMAL PROTEIN S14); structural constituent of ribosome	nuclear-encoded mitochondrial ribosomal protein S14	similar to ribosomal protein S14 [Brassica napus] (GB:YP_717170.1); contains InterPro domain Ribosomal protein S14; (InterPro:IPR001209)	80.41	97	19	0	137	427	68	164	2e-41	166
All.Contig_1255	GGGTACCATTCATTCATTATAGTTGAGAGACTCTCTCTGCATGCATCTTTCTTTCTCTCTTAATCTCCACTATTTGTCAGTATTTAAGCTTTTTTAAAAAAAAAAAACGATCAGAGTGTCCAATCTCTCTTATCGTTTCTTCAAAAGTTTATAATTATTCCATCCTCAGTTTTCTCTCGTAAATCTCATAAACAATCTTCTATTGCTTCTCTCTCCCTCTCTGCAATGAAGAAAATTGTATTAAAGTTGGATCTGCATGATGATAAGGCAAAACACAAGGCCCTTAAAACAGTTTCTACTCTCCCAGGAATCGATTCGATTGCAATGGATATGAAGGAGAAGAAACTAACCGTGATCGGAACGGTGGATCCAATAAATGTAGTAAGTAAGCTAAGAAAG…	1075	5	AT1G01490.2	heavy-metal-associated domain-containing protein		similar to heavy-metal-associated domain-containing protein [Arabidopsis thaliana] (TAIR:AT5G23760.1); similar to Unknown (protein for MGC:78286) [Mus musculus] (GB:AAH71252.1); contains InterPro domain Heavy metal transport/detoxification protein; (Inter	91.67	36	3	0	655	762	142	177	4e-14	75.9
All.Contig_1256	CACGTGACTTTAACTGACTTCGACCTCTCTTGTAGCCTCAATAAACCCACCCGACCCGAATTCTATCTATCCGACCCGGAACCGGATCCGAAACTTAAAACAAGTCTGAGATTTTTCCGGCAGAAGAAGAAGACGAAATCCGCTCGGGTCAACCCGATAACTCGACGGAGAATGAGCTTTTCCGGCGGCGAACGGTCGAATTCCTTCGTCGGAACCGACGAGTACATATCGCCGGAGGTAATTCGCGGCGACGGACACGATTTCGCCGTCGACTGGTGGGCGCTCGGCGYCCTGACGTACGAGATGATGTACGGAGCGACGCCGTTCAAGGGRMRAAGCAAGAAGGAGACTTTTCGTAACGTGTTGATGAAGGAACCCGAGTTCCCCGGAAAACCGTCG…	868	2	AT1G51170.1	protein kinase family protein		similar to protein kinase family protein [Arabidopsis thaliana] (TAIR:AT3G20830.1); similar to hypothetical protein [Vitis vinifera] (GB:CAN67877.1); contains InterPro domain Serine/threonine protein kinase; (InterPro:IPR002290); contains InterPro domain	83.26	239	27	5	1	678	166	404	4e-110	394
All.Contig_1257	CATCAATCTTGGTCCTGTCCTGTTTTAAATTTACCCTAAAAACCATTTAAAAAAAATATTATCTCTCTTCTCTTTGGAGGCTTGTTTGTTTGTTTACTGCATGGAATCGTCGTCTTCGGGAACAACTTCKTCGACGATTCAAACGTCWTCAGGRYCWGAGGAGAATCTCATGGAGCAGAGGAAAMGKAAKAGGATGCTCTCAAACCGYGARTCAGCGAKGAGAKCAAGGATGAAAAAACAGAAACTCCTCGACGATCTAACGGCTCAGGTTAACCAGCTCAAGAAAGAGAACAGCGAGATCGTGACAAGTGTCAGCATCACGACGCAGCACTACTTGGCCGTGGAAGCAGAGAACTCTGTTCTCCGGGCTCATCTCGATGAACTCAGCCACAGGCTCGA…	519	2	AT4G34590.1	GBF6 (ARABIDOPSIS THALIANA BASIC LEUCINE-ZIPPER 11); DNA binding / protein heterodimerization/ transcription factor	Encodes a basic domain leucine zipper (bZip) transcription factor.	similar to ATBZIP44 (ARABIDOPSIS THALIANA BASIC LEUCINE-ZIPPER 44), DNA binding / protein heterodimerization/ transcription factor [Arabidopsis thaliana] (TAIR:AT1G75390.1); similar to unknown [Populus trichocarpa] (GB:ABK94250.1); contains InterPro domai	74.6	126	25	1	152	508	18	143	6e-44	173
All.Contig_1258	GAAAGTGGAGGTGGATTTGGCTAACCAAGTTGTGAGGCTACTTGGATCTTCTCCTGTCAAGGCTATGACTCAAGCTTTGGAGCAAACTGGTCGTAAAGCTCGTTTGATTGGCCAAGGTGTTCCTCAAGACTTCTTAGTCTCAGCTGCAGTGGCGGAGTTCAAAGGACCAGACATCTTTGGGGTGGTTAGATTTGCTCAGGTCAGTATGGAGCTCGCGAGGATTGAAGCCAACTTTACTGGCTTGTCTCCCGGTAAACACAGTTGGTGTATCAACGAGTATGGAGATCTCACAAACGGAGCAGCCRGCACCGGGAACTTGTACAACCCACTTCAAGATCATACCCACACAGAGCCATTGGGCGRCCTGGGAACACTAGAGGCAGACCAAARCGGAGAGGC…	698	2	AT1G12520.2	CCS1 (copper chaperone for superoxide dismutase 1); superoxide dismutase copper chaperone	Copper/zinc superoxide dismutase copper chaperone. Localized to the chloroplast. Expressed in roots and shoots. Up-regulated in response to copper and senescence. The AtACC activates all three CuZnSOD activities located in three different subcellular comp	similar to CSD2 (COPPER/ZINC SUPEROXIDE DISMUTASE 2), copper, zinc superoxide dismutase [Arabidopsis thaliana] (TAIR:AT2G28190.1); similar to Cu/Zn-superoxide dismutase copper chaperone precursor [Glycine max] (GB:AAK01931.1); contains InterPro domain Hea	90.64	203	19	0	2	610	25	227	1e-102	369
All.Contig_1259	GCAGAAGAAGATCTATGTTAGTAACGTTGGAGCAGAGCTGGATCCTCAGAAGCTGCTAGCGTTTTTCTCGAAGTTTGGGGAGATTGAGGAGGGTCCTTTGGGTCTTGATAAGTATACTGGGAGACCTAAAGGCTTCTGTCTCTTTGTGTATAAGTCAGCTGAAAGCGCCAAGAAGGCTTTAGAGGAGCCACACAAGAGCTTTGAGGGCCACATCTTGCACTGCCAGAAGGCTATCGATGGTCCTAAACCTGGCAAGCCGCAACAGTTTAACAACAATCCTCGTTTCCAGAGGAATGATAACAGTGGTGGTTACGGTACTCCTGCTGGTCATGGACATCTCATGGCTGGTAACCAAGCCGGGATGGGTGCTCCTGTTCAWGCGATGAACCCAGCTATTGG…	914	2	AT3G56860.2	UBA2A; AU-rich element binding / RNA binding	encodes a nuclear protein that binds to RNA with a specificity for oligouridylates in vitro. Along with UBP1 and UBA1a, it may act as a component of a complex recognizing U-rich sequences in plant 3'-UTRs and contributing to the stabilization of mRNAs in	similar to RNA recognition motif (RRM)-containing protein [Arabidopsis thaliana] (TAIR:AT2G41060.2); similar to RNA recognition motif (RRM)-containing protein [Arabidopsis thaliana] (TAIR:AT2G41060.1); similar to hypothetical protein [Vitis vinifera] (GB:	77.95	195	36	3	2	565	244	438	7e-68	254
All.Contig_126	GACTCCACTCAACTCTCGTCACCTGTCTCTTACCTTTACTCTAGGGTTCTCAAGCTTCCCTCTCCGATCCGTTTCTTTCTCCAAGCTCAGGTCAAGATGCAAGCTGTGATTCGTTCGTTTGTGTCCGGTGGAAACGTTGTCAGATCATCTCTGCTGCAGCATCTCCGTGTGGTCAACCCTGCGATTCAGCCTTCCGTGTTGTCTACTCGCTATGAGTCCACTCAGCCTGCTCGTATGGAGGAGCATGGGTTCGAGAGCACAACCATTTCTGATGTTATGAACGCCAAAGGCAAAAGCGCTGATGGATCTTGGCTTTGGTGTACCACTGATGACACTGTTTACGATGCTGTTAAATCCATGACACAACACAATGTTGGTGCCTTGGTGGTTGTGAAACCT…	931	4	AT5G10860.1	CBS domain-containing protein		Identical to Uncharacterized protein At5g10860, mitochondrial precursor [Arabidopsis Thaliana] (GB:Q9LEV3); similar to unknown protein [Arabidopsis thaliana] (TAIR:AT1G47271.1); similar to unnamed protein product [Vitis vinifera] (GB:CAO21273.1); contains	91.75	206	17	0	97	714	1	206	2e-103	372
All.Contig_1260	GGAGCCTTTGTTTTTTTGGTCGGCGAAGAAAGGAAAGATATGTCGGGTCATCAGTGTACAGAGAACCCGCCTAAGCTGGATCCAAATAGCGGGTCGGGTCATGTAGAGAAGCTAGGCGGCCTCGACAGTTACGTCTCTGGTTCAACTCACTCAAAGCTCGCCGTTGTTCTTGTCTCTCATGTTTTCGGATATGAAACTCCACAACTGAGGAAACTTGCTGACAAAGTTGCAGAAGCTGGATTCTATGCGGTGGTTCCCGACTTCTTCCATGGAGATCCCTACAATCCCGCGAATGAGGATCGACCACTTCCTATCTGGATAAAAGATCACCCACAAGATAAGGCTTTTGAGGACTCAAAGCCAGTAGTTGATGCCTTGAAGAACAAAGGCATAACTACT…	540	1	AT3G23570.1	dienelactone hydrolase family protein		similar to dienelactone hydrolase family protein [Arabidopsis thaliana] (TAIR:AT3G23600.1); similar to unnamed protein product [Vitis vinifera] (GB:CAO71083.1); contains InterPro domain Dienelactone hydrolase; (InterPro:IPR002925)	82.04	167	30	0	40	540	1	167	3e-80	294
All.Contig_1261	GGTTGTAGTAGCTATGATGAACGGAGCAGATCTGATCAAGGCGAAGTACGACCTGAGCTCACTGAGAATAGTTAGGTGCGGTGGGGCTCCGTTGAGCAAGGAGGTTACGGAAGGGTTTATAGAGAAGTATCCAACGGTTGATATTTTTCAGGGTTACGCTTTGACGGAATCTAACGGTGCAGGAGGTTCTATTGATTCGGTGGAGGAGAGCCGGAGATATGGTGCGGTGGGGTTGTTGTCGTCCGGTGTGGAAGCGAGGATTGTGGATCCGGATACGGGTCGGGTCATGGGTGTTAATAGAACGGGTGAGCTCTGGCTTAAAGGGCCTTCTATTGCCAAAGGTTATTTTAAGAATGAAGAAGCTACAAAAGAAAGTTTTAATTTACAAGGATGGCTTAG…	1059	2	AT1G20500.1	4-coumarate--CoA ligase family / 4-coumaroyl-CoA synthase family		Identical to 4-coumarate--CoA ligase-like 4 (4CLL4) [Arabidopsis Thaliana] (GB:P0C5B6;GB:Q9LMV7); similar to AMP-dependent synthetase and ligase family protein [Arabidopsis thaliana] (TAIR:AT1G20490.1); similar to unnamed protein product [Vitis vinifera]	84.44	45	7	0	778	912	506	550	4e-116	74.7
All.Contig_1262	GCCCAAAAGTCTTCTCTCTCGATCCCCAATTCGTTTTTCTAGGGTTCAAAGAAAGGAAGATCGAAATGGCGATGAGGCGGATCTACAGTGAGATCAAGGGGAAGAAGGTGAAGGAGCTTCCCGCCTACATCAAATCGACGTTTTCAGTTGAARCCGTGAAGACCTCTGTGAGGAAAAGTCTCGATAACTACAACGACAAGTACATCCAGACGAGCTCCGTAGATCCTCTCCTTCACATCTGCTTCGGAGGCATGGCCTTCTCTTACCTCGTCGCTCTCCCCAACGAGCGCCGCCATCTCGAGCACCAGCAGCACGCTAAGGAGCACGGTGGCCATTGATCTCGACGAATCTTTCTCCGATCCCTCCATGTGTGTTTAGATGATGAAGTCTTTTCTGCGA…	538	2	AT4G30010.1			similar to unknown [Populus trichocarpa x Populus deltoides] (GB:ABK96249.1)	85.56	90	13	0	66	335	1	90	8e-42	166
All.Contig_1263	GGAAGCAAACAAATATTCATTCCTYTCTTTCGTCTCTCTCCCTCAGATCCGTCTCAAGCTATGGACGGTGGAGCAGAAGGAACTCAGCAGCCTCACCTYATYYTAGCTCACAAGCTCTTCCTCCTCACWCATCCMGATGTTCAAGACATCGAGAAAGTCCAGCTCAAGTCTGACGTCTTGGATTCCATCAAATCCGATGGGATGGCTCCATTGTACGAAACCCTAGCGGCGTCYTCKGTTCTGGAGTTGGATCAGAGCTTGTTGGAYTCTATGCGGGCTARCAACGAGGAGGAGCTTAAGAAGCTCGACGACAAGATTGCAGATGCGGAAGAAAATTTGGGAGAAAGTGAAGTCCGTGAAGCTCACCTTGCTAAGGCTCTGTATTTCATCAGGATTAGT…	535	2	AT4G24820.2	26S proteasome regulatory subunit, putative (RPN7)		Identical to Probable 26S proteasome non-ATPase regulatory subunit 6 [Arabidopsis Thaliana] (GB:Q93Y35;GB:Q9SZX2); similar to FUS6 (FUSCA 6) [Arabidopsis thaliana] (TAIR:AT3G61140.1); similar to 26S proteasome subunit RPN7 [Capsicum annuum] (GB:ABK42076.1	91.77	158	13	0	61	534	1	158	2e-76	281
All.Contig_1264	GAATATGTGGAAGATGAAGAGGGTAAGCCAAAACTGCAGATCGACGCTCAAAACTGTTTGCACTGCAAGGCATGTGATATTAAAGATCCGAAGCAAAACATAGAGTGGACAGTGCCTGAAGGTGGTGGCGGCCCTGCTTATTCCGTAATGTAGTAATCCTCATCAACACGCACTTTACCACGTCCCATAAGTAAATAAAGACTCAAAACAAAACCATATGTTGTTATGAGCTTTTTAGTGATAGAAAGTGTATGATGTTTTAGCTTGTTGTAAACTTTCATTTGACATTTAATGGGAACACATCACAAAAAAAAAATTCAAAATC	325	2	AT2G43400.1	ETFQO (ELECTRON-TRANSFER FLAVOPROTEIN:UBIQUINONE OXIDOREDUCTASE); catalytic/ electron acceptor	Encodes a unique electron-transfer flavoprotein:ubiquinone oxidoreductase that is localized to the mitochondrion. Mutants are more sensitive to sugar starvation when plants are kept in the dark for long periods.	similar to unnamed protein product [Vitis vinifera] (GB:CAO16939.1); similar to putative electron transfer oxidoreductase [Oryza sativa] (GB:AAK39567.1); similar to Electron transfer flavoprotein-ubiquinone oxidoreductase,mitochondrial precursor, putative	94	50	3	0	1	150	584	633	3e-25	109
All.Contig_1265	GACGTTAGGTTCTTCATCGTCACCACCAAGCAAGAAGCAAAAACTGGTCCCGAATTCTATGGATCAAAGTAYTGAACAGCTCAATGATGTCACTGCAGTCAGTGGTGTTAATCTCAGGGAAGAGGAAGAACAATTGTTCTCTGGGGGAAAGGAGGATGGTCGTGTTTCTGAAGCATCTCGGAGAGTTGTGCACGAAGAGGAAGAAAGACTAATTTTGCAGAAAATTCCTCTKCAGAAAAAGCTGGCTGAAATTATGGCAAAAGTCGGCTTAAAGCAGATAAGCAATGATGTTGAACGGTGCTTGTCTTTGTGTGTGGAAGAAAGGATGCGAGGACTATTATCTCATATAATTCGGTTGTCCAAGCAGCGAGTTGATACTGAGAAATCYAGACACCGGAC…	739	2	AT5G43130.1	TAF4 (TBP-ASSOCIATED FACTOR 4); transcription initiation factor		similar to TAF4b (TBP-ASSOCIATED FACTOR 4b), transcription initiation factor [Arabidopsis thaliana] (TAIR:AT1G27720.1); similar to unnamed protein product [Vitis vinifera] (GB:CAO61456.1); contains InterPro domain Transcription initiation factor TFIID com	91.46	246	21	0	2	739	511	756	3e-72	268
All.Contig_1266	GGCTACGCAGTCGGTGTGCTATCTATCTCTCTCTCTCTTCTTMGTGAATCTAGGGATCTKCAATCAACAATGAATCGCCACCACGACCCCRAYCCTTTCGATGAASAGGARGAAKAAATCGTCAATCCCTTCTCTAAAGGCGGTGGACGAGTTCCTGCTGCATCTARGCCAGTTGGATTTGGCCAAAGCCTCGATGCTACTGTTGATATTCCCTTGGATAACATGARTGACTCTTCTCAGAARCAGAGAAAGCTTGCTGACTGGGAAGCTGAGCTTAGGAAGAAAGAAATGGATATTAWACGGAGAGAGGATGCTATTGCTAAATCTGGTGTTCAGATAGATGAGAAAAACTGGCCGCCGTTTTTTCCAATCATACACCATGACATTGCTAATGAGATA…	704	2	AT1G32050.1	secretory carrier membrane protein (SCAMP) family protein		Identical to Secretory carrier-associated membrane protein 4 (SCAMP4) [Arabidopsis Thaliana] (GB:Q9C6X2); similar to secretory carrier membrane protein (SCAMP) family protein [Arabidopsis thaliana] (TAIR:AT2G20840.1); similar to unknown [Populus trichoca	93.36	211	14	1	70	702	1	210	7e-115	409
All.Contig_1267	GGAGAAGAGAGAGCATCAACAAAAAAATGGCCAGCCGAAAAGCTCTCATTAACGTCCACCGGATCATCCGCTCCACTGCGGTGGTTAGACAGAGCTCCGTCACCCCTTCCGCTGCACCTCCTATTTTCCAAAATGGAGTTGATTTGGGGGCAAGATTCTTCTGCTCGAGTCCACAAAGCTTTGATATTGATCTCTCCAACGAAGAGAAGAAGAGGATAACCATCAACAGATTGTTGTATAGGAGCAAGCAACGAGGGTTTCTGGAGCTTGATCTTGTTTTGGGTAACTGGGTTGAGGAGAATGTCAATTCCGTGGACGAAACCGCTGTCAAATCCCTTATTCATGTCCTCGATTTGGAAAACCCTGATCTCTGGAAATGGCTAACTGCTCAGGAACAGC…	807	2	AT5G51040.1			similar to unnamed protein product [Vitis vinifera] (GB:CAO23083.1); contains InterPro domain Protein of unknown function DUF339 (InterPro:IPR005631)	84.04	188	23	2	27	569	1	188	1e-85	313
All.Contig_1268	GAACCAAAAGCCTCTCCCAAAATCTCAAAACACCGATCCATTTCTCCGGCGATAAATCGACGATCTCGATCCGATGGCGAAGGAACCAGTTCGCGTTCTCGTTACCGGTGCTGCAGGACAAATTGGATACGCTCTTGTCCCTATGATTGCAAGGGGTATCATGCTTGGTGCTGACCAGCCAGTGATCCTCCACATGTTGGATATTCCCTTTGCTGCTGAAGCTCTCAACGGTGTCAAGATGGAGTTGATCGATGCTGCTTTCCCTCTTCTCAAAGGTGTTGTTGCTACAACTGATGCCGTTGAGGGATGTACTGGAGTCAACGTTGCTGTTATGGTTGGTGGTTTCCCGAGGAAAGAAGGAATGGAGAGGAAGGATGTCATGTCCAAGAATGTCTCCAT…	996	2	AT5G43330.1	malate dehydrogenase, cytosolic, putative		Identical to Malate dehydrogenase, cytoplasmic 2 [Arabidopsis Thaliana] (GB:P57106;GB:Q9LSX3); similar to malate dehydrogenase, cytosolic, putative [Arabidopsis thaliana] (TAIR:AT1G04410.1); similar to malate dehydrogenase-like protein [Solanum tuberosum	95.11	307	15	0	74	994	1	307	2e-161	565
All.Contig_1269	GGGCTCTTCTCATTGGCGCAAAACCTCGAGGCCCTGGAATGGAACGTGCCCCCTTGTTGGACATTAATGGCCAGATCTTTGCTGAGCAAGGCAAAGCTCTTAATGCTGTTGCCTCTCCTAATGTTAAGGTCCTTGTAGTGGGGAATCCTTGCAACACCAACGCCTTGATTTGTCTTAAAAATGCTCCCAACATTCCTGCAAAGAACTTCCATGCCCTCACGAGGTTGGATGAGAATCGTGCCAAGTGTCAGCTTGGCTCTTAAAGCCGGGGTCTTCTATGATAAAGTGTCTAATATGACCATATGGGGAAATCACTCCACGACTCAGGTGCCAGACTTCTTAAATGCAAGAATTAATGGCCGGCCGGTGAAGGAGGTTATTACAGATCACAAATGGTTA…	1039	2	AT5G58330.1	malate dehydrogenase (NADP), chloroplast, putative		similar to malate dehydrogenase, cytosolic, putative [Arabidopsis thaliana] (TAIR:AT5G56720.1); similar to hypothetical protein [Vitis vinifera] (GB:CAN70407.1); similar to Malate dehydrogenase [NADP], chloroplast precursor (NADP-MDH) (GB:P21528); similar	95.24	84	4	0	3	254	179	262	1e-135	164
All.Contig_127	AAAGACAGTACGGAACAATCGACTTGTACTGGATCGTGAGAGACGGTGGTCTCATGCTTCTTCTCTCTCAGCTTCTTCTGACGAAAGAAAGCTTCGAGAGCTACAAGATCCAGCTCTTCTGCATAGCTGAAGAGGATTCAGACGCGGAAGCATTAAAAGCCGACGTGAAGAAGTTCCTCTACGACCTCAGAATGCAAGCCGAAGTAATCGTGGTGACGATGAAGTCGTGGGACATAAGATCAGAGGGAAACAGCAAAGAAGATTCGTTGGAGGCTTTTGATGCTGCGCAGAGACGAATCTCGGATTACTTGGGAGAGATAAAGAGTCAAGGTTCGACTCCAAGGTTGGCAAACGGGAAAGCGATGGTGGTTAATGAGCAACAAGTGGAGAAGTTTCTAT…	576	2	AT1G30450.2	CCC1; cation:chloride symporter	member of Cation-chloride co-transporter family	similar to TPA: cation chloride cotransporter [Medicago truncatula f. tricycla] (GB:CAJ38499.1); similar to putative Na+/K+/Cl-cotransport protein [Oryza sativa (japonica cultivar-group)] (GB:BAD03666.1); similar to cation-chloride co-transporter [Nicotia	95.81	191	8	0	3	575	779	969	3e-94	340
All.Contig_1270	AAGCAGTGGTATCAACGCAGAGTGCCCATTACGGCCGGGAGTTGTTAAAATTCCTTATGATATGCAGCTAAAACAAGTTCTAGCTAATGGTAAAAAAGGAGCTTTGAATGTGGGAGCTGTTCTTATTTTACCGGAGGGGTTTGAATTAGCCCCCCCCGATCGTATTTCACCCGAGATGAAAGAAAAGATAGGAAATCTGTCTTTTCAGAATTATCGCCCCMATAAAAAAAATATTCTTGTGATAGGTCCTGTTCCTGGTCAAAAATATAGTGAAATAACCTTTCCTATTCTTGCCCCAGACCCTGCTACTAATAAAGATGTTCACTTCTTAAAATATCCTATATACGTAGGTGGAAATAGGGGAAGGGGTCAGATTTATCCTGATGGTAGCAAAAGTAA…	450	2	ATCG00540.1		Encodes cytochrome f apoprotein; involved in photosynthetic electron transport chain; encoded by the chloroplast genome and is transcriptionally repressed by a nuclear gene HCF2.	Identical to Apocytochrome f precursor (petA) [Arabidopsis Thaliana] (GB:P56771); similar to cytochrome f [Crucihimalaya wallichii] (GB:YP_001123475.1); contains InterPro domain Rudiment single hybrid motif (InterPro:IPR011054); contains InterPro domain C	99.26	136	1	0	41	448	83	218	1e-74	275
All.Contig_1271	GGTAAAAGGGAAGTTGGATATTTGGTGGACTCTTCATCTTTCCTCTTCCTCACCTCATCAAAAGATCCGAACCCGAAACTCTCTCGAGAGAAACRCAGAGAGAGGAAGAGCYTCCTACTATTCTAKTCCAACTGTTTCAGATCTGAACGATTTGTCTTAAAGTCTGTTCCTTTGAGAATCAGGATAAGTAATCGGAGCTGGGTTTWGCGTTTAAGGAAGTTTCAAAGTCAACGGATATGCCGGAGGAGGAGTCGGTAGATATCAAATTCAGGCTCTAYGATGGCTCCGACATCGGACCCTTCCACTACTCGTCTTCCTCGACCGTCGACTTTTTGAAGCAAAGGGTCGTCTCTGATTGGCCCAAAGGCAAAACAGTTGTTCCGAAAGGGATAAACGAAG…	592	2	AT4G24990.1	ATGP4 (Arabidopsis thaliana geranylgeranylated protein)	geranylgeranylated protein ATGP4	Identical to Membrane-anchored ubiquitin-fold protein 3 precursor (MUB3) [Arabidopsis Thaliana] (GB:Q9SW27;GB:Q9ZRD4); similar to MUB4 (MEMBRANE-ANCHORED UBIQUITIN-FOLD PROTEIN 4 PRECURSOR) [Arabidopsis thaliana] (TAIR:AT3G26980.1); similar to unknown [P	91.53	118	10	0	237	590	1	118	2e-51	198
All.Contig_1272	GCTTACCATGAGCAGCTATCAGTCCCTGAGATCACTAACGCCGTGTTTGAGCCAGCTAGCATGATGGCTAAGTGTGACCCAAGGCATGGGAAGTACATGGCGTGTTGTTTGATGTACCGTGGWGATGTTGTYCCTAAAGATGTTAACGCTGCTGTTGGTACTATCAAGACTAARAGGACYGTTCAGTTTGTTGACTGGTGCCCRACWGGKTTCARATGTGGAATCAACTACCARCCTCCRACRGTTGGTYCCKGGAGGYGACCTCGCTAAGGTCCAGAGAGCRGTGTGCATGATCAGCAACAACACAGCAGTTGCAGAGGTGTTCTCAMGAATCGACCACAAGTTTGATCTKATGTACGCGAAGAGRGCGTTTGTKCAYTGGTACGTYGGTGAAGGAAT…	697	3	AT5G19780.1	TUA5 (tubulin alpha-5)	Encodes an isoform of alpha tubulin. Closely related to adjacent gene TUA3 suggesting recent duplication.	Identical to Tubulin alpha-3/alpha-5 chain (TUBA5) [Arabidopsis Thaliana] (GB:P20363); similar to TUA3 (tubulin alpha-3) [Arabidopsis thaliana] (TAIR:AT5G19770.1); similar to TUA2 (tubulin alpha-2 chain) [Arabidopsis thaliana] (TAIR:AT1G50010.1); similar	98.55	69	1	0	245	451	362	430	1e-80	140
All.Contig_1273	GGGTGCAAAAAACAAGAAAGGTTCTGTCTGTACAACGAGTTTCGTGTTTCACTCAGATTTCGTTTCTCTCTCTCTTTTATTATCTCTCTTCTGATCTTGAGAAAGAGAAGCGTTAAAAACCCCTTTCAAGGGAATGCAGAAAGATGGTCGGAACATCGCCGGTGAAGACTAAGCTGTGTGATCGGTTTAACCGATCTGTCGGCGGCAGGAACTGCCACCGGAAACACGTCGAGGACGGGTGATCATATTCAACACTCTCGAATTCTCCGGACATCGAAAGCTTAATTAAACCTTTTTTCTCTTTTATTTTTCTTTTAATTTAAAATAATCATTGTAATAAAAAAAATATGGTCGAAGCTTCTGGATCCGAATCCGAATACACAGATCACTATCGATAAG…	589	2	AT4G30960.1	CIPK6 (CBL-INTERACTING PROTEIN KINASE 6); kinase	Encodes CBL-interacting protein kinase 6 (CIPK6).	similar to CIPK20 (CBL-INTERACTING PROTEIN KINASE 20), kinase [Arabidopsis thaliana] (TAIR:AT5G45820.1); similar to CBL-interacting protein kinase [Brassica napus] (GB:AAL37170.1); contains InterPro domain NAF; (InterPro:IPR004041); contains InterPro doma	85.71	77	10	1	361	588	259	335	6e-31	130
All.Contig_1274	GGTTAAAACCAGGTGGATATTAGAGTTAACTCTAKACGTATAGATCAGAAASAGACACGASTGCGATGGGAGGAGGAGACGGTGGTGAKGACTCCGTAGTWCACTTTGTACTTGTWCATGGCGCCAGCCACGGTGCTTGGTGTTGGTATAAACTGACCACTCTTCTTGCCGCCGCCGGTTTCAAAGCCACCTCTGTCGACCTCACCGGAGCTGGCATCAACCTCASCGACTCTAACACCGTCGTCGASTTCGACCAGTATAASCGTYCTCTCTTCYCTCTCCTGTCAGATCTCCCTCCTCACCACAAGATCATACTCGTGGGACATAGCATCGGCGGAGGAAGTGTCACTGAAGCTCTATGCAAGTTCACAGACAAAATCTCCATGGTCGTGTAGCTCG…	502	2	AT4G16690.1	esterase/lipase/thioesterase family protein		similar to hydrolase, alpha/beta fold family protein [Arabidopsis thaliana] (TAIR:AT5G58310.1); similar to hypothetical protein [Capsella rubella] (GB:CAC82615.1); contains InterPro domain Alpha/beta hydrolase fold-1 (InterPro:IPR000073); contains InterPr	79.85	134	27	0	96	497	10	143	7e-58	219
All.Contig_1275	GATGTTGAAATCCTATTCTCAAGCGCTCTGAAACAGAAAAATGGAGAAAAAAATCGGCATTGTGCTCTTCCTTTTTGTTCTTCTCCTTCTTCAGTTTTCTGAACTTCGTACAGCTCAACGACCTTCCCAAGTGGATAAAGAAGTAGAAGAAAAAGGAGTCAATAACAATAATTGGGCCTGGACTACACAAGCAGATAAGGCATCTGACATGGCCCAAGAGTTATCACATCTTATGGGAGAAGAGAAATGCGAGGAGAGTGATGAAGAGTGTATGAAGAGAAGGATGATCACTGAATCTCACTTGGACTACATCTACACTCAAAGCCACAACAAACCTTAAWTACCACCCACCTTTTGTCATTCKTCAGGAKGTACTAAGWATSAATAATCCAACACCAT…	570	2	AT3G44735.1	PSK1 (PHYTOSULFOKINE 3 PRECURSOR); growth factor	Phytosulfokine 3 precursor, coding for a unique plant peptide growth factor.	Identical to Putative phytosulfokines 6 precursor (PSK6) [Arabidopsis Thaliana] (GB:Q8LA14;GB:Q7PCC2;GB:Q8W5Q9); similar to hypothetical protein [Vitis vinifera] (GB:CAN62427.1); contains InterPro domain Phytosulphokine; (InterPro:IPR009438)	69.44	36	11	0	221	328	44	79	7e-05	43.9
All.Contig_1276	GAAGAGCTAAGCAAAAATTCATTTCTCTATTTCTTCCATCTCCTTTCAAAACTCTCTCTCTCTACTGAGTAAGCTCCATTACTCTGTTTTTTTCTTCCTCTTTCTATTGAATAAGCTCCACTGCTCTGTTATATTCGAAAGGCTTAGTCTTTAAGGTTCTGCAAGAAAATGGCTTCTTATAGATCCCAATCTGAGCTCTGCCCTCTCTCGCCGTGTCCCTCTCTCGGAAACTTCGTTGAAGGATCAAAGACGCATGTCGTTTCCTCGTCTCCGCTGTTCTTGGCACAGTTCTCTCGGCGATCTTGACCTTCTTCTTCGCTCTAGTGGGAACATTGCTTGGAGCAGTCACAGGAGCTTTAATAGGCCAAGAAACAGAGAGCGGTTTCATCCGCGGAGCGG…	1090	2	AT4G35840.1	zinc finger (C3HC4-type RING finger) family protein		Identical to RING-H2 finger protein ATL4M (ATL4M) [Arabidopsis Thaliana] (GB:Q8GT75;GB:Q8GXV3;GB:Q9SZT2); similar to zinc finger (C3HC4-type RING finger) family protein [Arabidopsis thaliana] (TAIR:AT2G17730.1); similar to unnamed protein product [Vitis	83.61	238	39	3	165	878	7	236	4e-105	378
All.Contig_1277	GAAAAATGAATGATTCTGTATGTGTTGATAAACTACCTGAAGGGATTAATGAGATGAAGATTAAAGATAATAAGGAAATGGAAGCAGCTGTGGTTGATGGGAATGGAACTGAGACAGGTCACATCATTGTTACAACCATTGGTGGTAAAGATGGTCAGCCTAAACAGACCATAAGCTATATGGCAGAGCGCGTCGTTGGACAAGGTTCATTTGGAATCGTTTTTCAGGCAAAGTGTTTAGAAACGGGGGAAACTGTTGCGATAAAGAAAGTTTTGCAGGACAAGAGATACAAGAACCGTGAGCTGCAGACGATGCGCCTTCTTGATCACCCTAATGTCGTCTCCCTCAAGCATTGCTTTTTCTCAACGACCGAGAAAGATGAGCTGTATCTCAACCTGG…	1386	2	AT5G14640.1	protein kinase family protein		Identical to Shaggy-related protein kinase epsilon (ASK5) [Arabidopsis Thaliana] (GB:Q8VZD5;GB:Q9LYJ6); similar to ATSK11 (Arabidopsis thaliana SHAGGY-related kinase 11), protein kinase [Arabidopsis thaliana] (TAIR:AT5G26751.1); similar to ATSK12 (Arabid	96.44	393	14	0	9	1187	18	410	0	781
All.Contig_1278	CGGACTTCTGGCGGTCGCGGTGGCTCATGCCCTTGTAGTGGCGGTCATGATATCTGCGGGCCATATCTCCGGTGGCCACCTCAACCCCGCTGTCACCATCGGCCTACTTTTCGGAGGTCACATCAGCGTCTTCCGCGCATTCCTCTATTGGATTGATCAGCTGTTGGCCTCCTCCGCAGCCTGCTTGCTCCTAAGTTACCTCACTGGAGGAATGGGAACTCCGGTTCACACTTTGGCAAGTGGAATCAGTTACACCCAGGGTATCATATGGGAGATCATCTTAACATTCTCACTTCTCTTCACTGTCTACGCCACGATGGTGGATCCCAAGAAAGGCTCCCTTGATGGGCTAGGCCCACATTCTCACCGGATTCGTCGTCGGAGCCAACATCCTTGCCG…	623	2	AT2G25810.1	TIP4;1 (tonoplast intrinsic protein 4;1); water channel		Identical to Aquaporin TIP4-1 (TIP4-1) [Arabidopsis Thaliana] (GB:O82316;GB:Q53XD1); similar to GAMMA-TIP (Tonoplast intrinsic protein (TIP) gamma), water channel [Arabidopsis thaliana] (TAIR:AT2G36830.1); similar to aquaglyceroporin; tonoplast intrinsic	94.23	104	6	0	47	358	67	170	2e-44	175
All.Contig_1279	CCCAGAACGCTGCGTCGAGATTGGAGCCAATCTCCACGAACCTTTAAGGACAGAACTCATAACCTGTCTTAAAAAGAACCTTAACACTTTCGCATGGGCTGCGGAAGATATGCCAGGAATCGACATTAACATAACATGTCACGAGCTGAATATCGACCCAACATTCAAACCCGTCAAACAGAAAAGACGAAAGCTGGGACCCGAACGTGCTGCCACAGTAAACGATGAGGTCGAAAAACTGCTTAAAGTTGGGTCGATAACGGAAGTAAGATACCCGGACTGGCTCGCCAACCCCGTAGTAGTCAAAAAGAAAAACGGGAAGTGGCGAGTTTGCGTAGATTTTACCGACCTAAACAAGGCATGTCCAAAGGATAGCTTCCCTCTACCACATATCGATCG…	935	3	AT2G22425.2	signal peptidase		Identical to Probable signal peptidase complex subunit 1 [Arabidopsis Thaliana] (GB:Q944J0;GB:Q7G9Y5); similar to signal peptidase [Arabidopsis thaliana] (TAIR:AT4G40042.1); similar to Microsomal signal peptidase 12 kDa subunit family protein [Oryza sati	86.25	80	11	0	532	771	1	80	3e-26	115
All.Contig_128	GAAGAAAGATCCTTTTAATGAATTTGTTTTWTTTTCCTTGGGAGTTTCAGARTAGCTACAGAGAGTATCTGAAGCTTAAGGGTAGGTATGAGAGCCTTCAGCGCCAGCAAAGGAATCTTCTTGGGGAGGATTTAGGACCTCTCAACTCAAAGGAACTAGAGCAGCTTGAGCGTCAACTAGATGGATCTCTCAAGCAAGTTCGCTCCATCAAGACACAGTACATGCTTGACCAGCTCTCTGATCTTCAAAGCAAAGAGCAAATGTTGCTTGAAACCAATAGAGCTTTGGCAATAAAGCTGGATGATATGATTGGTGTGAGAAGTCATCATATGGGAGGAGGAGGAGGATGGGAAGGCAATGAACAGAATGTTCCGTACGRGCATCATCACCAAGCTCAGC…	739	2	AT5G15800.1	SEP1 (SEPALLATA1); DNA binding / transcription factor	Encodes a MADS box transcription factor involved flower and ovule development. Functionally redundant with SEP2 and SEP3.	Identical to Developmental protein SEPALLATA 1 (SEP1) [Arabidopsis Thaliana] (GB:P29382;GB:Q9LFU6); similar to SEP2 (SEPALLATA2), DNA binding / transcription factor [Arabidopsis thaliana] (TAIR:AT3G02310.1); similar to SEPALLATA1 [Arabidopsis lyrata subs	89.76	166	17	1	42	539	87	251	7e-72	266
All.Contig_1280	GGCCGAACCAACTGTCCTCCGGGAACCCCTAAAGAGAAAAAAATCCTCATCAATTGCCTTCTTCCTCAAGAAACCTCTTTCCTCTTTCAATTTGAATTTCCCAAAAAAACAAAAAAAAAATWMAAAATGGTGTTTAAYTCWTCYAAAACCAGATCCAGCGGRCCGGTGCTACGCTCYGTATCACCGTCMGGTCGTTTCTACGGCGGCGTATCGTCTCCTTCCTCATCAGGYTTCGCTTCCTCCACAAGCTCGAGCTTCTCGTCTACATCCTTTTTCAGCAACMRCCGTCAACAGCAWCATCCCCMMCACAGATCCGCGTCTCCCRCCCGCGTGAAYCTCTTCACCTCAACGCCGTTGAAYCAGTCGTTCCGTTACTCGATCGATAACAGATCCGTYTCC…	734	3	AT5G25280.2	serine-rich protein-related		similar to serine-rich protein-related [Arabidopsis thaliana] (TAIR:AT5G11090.1); similar to serine-rich protein [Brassica rapa] (GB:ABL97972.1)	70.42	213	51	4	130	732	3	215	4e-68	254
All.Contig_1281	GCTCCCCTGAATCGCTAATCTCGAATCCTTAAAAAGAACGGTAGTAAGGAGCCATGGATCCAGCTGAGATGAGGTACTTGGARGAAGAGGACGGCCCCATGATGARGACCATCAAAGGCAGCGTGACTGGCTTCGCCGCMGGGACCATCTACGGAACCATTTTGGCCACGTGGAAAGACGTTCCGAGGGTGGAGAGGAACGTGGCTCTTCCGGGGCTKATCAGGACGCTGAAGATGATGGGAACACACGGGCTCAYTTTCGCCGCCATTGGAGGAGTTTACATCGGTGTTGAGCAGGTGGTTCAGGGTTATAGAGGMAAGAGAGATTTTTTCAATGGTGCTATTGGTGGGTTTGTTGCTGGAGCTTCTGTCCTTGGCTACAGAGCAAGGAGCATCCCAA…	635	2	AT2G42210.4	ATOEP16-3; P-P-bond-hydrolysis-driven protein transmembrane transporter	Homologous to pea OEP16 and barley pPORA (OEP16), a member of Arabidopsis OEP16 family.	similar to unnamed protein product [Vitis vinifera] (GB:CAO23372.1); contains InterPro domain Mitochondrial import inner membrane translocase, subunit Tim17/22; (InterPro:IPR003397)	91.14	158	14	1	54	527	1	157	3e-78	287
All.Contig_1282	GGGTCGCCGTCTTCACAAAAAAACTATTAGCTTTCCGCCTCCTTCGAGATCTCCATCAACTAAAATGAAGGTTGTCGCCGCCTACTTGCTTGCCGCTTTGAGCGGAAAAGCTTCCCCAACCAGTGCCGATATCAAACAAATCCTCGGATCTGTTGGTTGTGAATCTGAAGACTCTCAGATTGAGCTTTTGTTGAAGGAAGTCAGTGGGAAAGACTTGTGTGACCTGATTGCTGCTGGGAGGGAGAAGTTGGCTTCCGTTCCAAGCGGTGGTGGTGGTGTTGCAATGGCCGCTGCTCCATCTGCCGGTGGAGGTGGTGGTGCTCCTGCGGCTGAGGCCAAGAAGGAAGAGAAGAAAGAAGAGAAGGAAGAATCCGATGATGACATGGGTTTCAGTCTGTT…	581	3	AT2G27710.3	60S acidic ribosomal protein P2 (RPP2B)		Identical to 60S acidic ribosomal protein P2-2 (RPP2B) [Arabidopsis Thaliana] (GB:Q9SLF7;GB:Q8LB03); similar to 60S acidic ribosomal protein P2 (RPP2A) [Arabidopsis thaliana] (TAIR:AT2G27720.1); similar to 60s acidic ribosomal protein-like protein [Solanu	88.71	62	7	0	65	250	1	62	4e-23	104
All.Contig_1283	GAGAACAGAGGAAGCCAAAGGCGACGAGAGACGACGACGACGACGAAGATGAGAGAGACGGTGAAGTTAATAAGCATGGAGGGTTTCGAATTCACCATCGACAGGGAAGCCGCCATGGTTTCTCAGACCATCCGGAGCATGCTCACTTCTCCAGGTGGCTTCTCGGAATCGAAAGATGGTGTCGTGACTTTCCCTGATATTAGCACCACCATTCTAGAGAAGATCTGCCAGTACTTTTATTGGTCTCTACAATACTCCAGAGGCAAGGAGACGGAGTTCCACATCGAGCCTGAACTGACTCTGGAGCTAATGATGGCTGCTAATTATCTTCACACTTGAAGAATYAAAATGATAACGCTTCTGGATCTTATTGRACTTAKTATAKSTTCGTTTGAGGTC…	691	2	AT5G59140.1	SKP1 family protein		similar to unnamed protein product [Vitis vinifera] (GB:CAO21566.1); contains InterPro domain SKP1 component, POZ; (InterPro:IPR016073); contains InterPro domain BTB/POZ fold; (InterPro:IPR011333)	98.91	92	1	0	61	336	5	96	3e-47	184
All.Contig_1284	GGATCTCAGTGAAGCAGCTCGGATCTGAGTTTTATCAATGGCGAAATTAATCCTTAGCGTCGTCTCGTTGGTTCTTATCGGTCTCGTCGCGATCGCTTCCGCCGCGGTTATCTTCGAGGAGCGCTTTGATGATGGATGGGAGAACAGATGGGTTAAATCAGAGTGGAAGAAAGAGGATAAGTCTGCTGGGGAGTGGAGCCACACTGCTGGAAACTGGTCTGGTGATGCTAACGATAAAGGTATCCAGACCAGTGAGGACTACAGATTCTACGCCATCTCAGCTGAGTTCCCTGAATTCAGCAACAAGGACAAGACTTTAGTCTTCCAATTCTCAGTCAAGCACGAGCAGAAGCTTGACTGTGGTGGTGGCTACATGAAGCTTCTCAGTGGTGATGTTGA…	1186	2	AT1G09210.1	calreticulin 2 (CRT2)		Identical to Calreticulin-2 precursor (CRT2) [Arabidopsis Thaliana] (GB:Q38858;GB:O04152;GB:O80486;GB:Q94AW7); similar to CRT1 (CALRETICULIN 1), calcium ion binding [Arabidopsis thaliana] (TAIR:AT1G56340.2); similar to CRT1 (CALRETICULIN 1), calcium ion b	91.53	366	31	1	89	1186	18	382	0	635
All.Contig_1285	GAGCCAATGACTGTAGAGTCCACAACGCAAGCGCTGTGTGATCTGGCTTTACGGTTTGGTGAAGGAGATGAAGGATCAATGTCTCGGCCATTTGGAGTGTCTCTTCTCATTGCTGGTCATGATGAAAACGGACCGAGCTTGTACTACACGGACCCGTCTGGAACATTCTGGCAGTGCAACGCAAAGGCCATTGGTTCAGGGTCAGAAGGAGCTGATAGTTCTCTTCAAGAGCAATTCAACAAAGATCTGTCACTCAGTGAAGCTGAGACGATCGCTGTGTCTATCCTGAAGCAAGTCATGGAAGAGAAGGTGACTCCGAATAATGTGGACATCGCCAAGGTAGCTCCAGCGTACCATCTCTACACTCCAGAGGAAGTGGAAGCAGTCATTAGTCGTCTT…	673	2	AT1G53850.2	PAE1 (20S proteasome alpha subunit E1)	Encodes alpha5 subunit of 20s proteosome involved in protein degradation.	Identical to Proteasome subunit alpha type-5-A (PAE1) [Arabidopsis Thaliana] (GB:O81149;GB:Q56ZL5); similar to PAE2 (20S proteasome alpha subunit E2), peptidase [Arabidopsis thaliana] (TAIR:AT3G14290.1); similar to Proteasome subunit alpha type-5 (20S pr	96.24	133	5	0	1	399	105	237	3e-69	258
All.Contig_1286	GGATTTCGATCCTATTGTGTTGGCCTTCGGGATCGGAGTAATGATTAACAGGGACAGCCGGGGTTTGTGTGCCGTTGTTGTGGGGACGCTAGGTTTATTCCGTGTTCGAATTGTAGTGGGAGTAAGAARCTGTATGATGAGGATGAAGATAGGCACAAGAGGTGTCCCGAGTGTAAYGAGAATGGGTTGATACGGTGTCCTGATTGCTCCTCTTGAGAGGGATAAATCAAGAAGAGATAGGTATTTGGTTTCTCTATTGATGATTGTCTAGAACWTAAGTGATTGATGATGCTGCTWCAAGTATCCGARAMTCTCTTTTGGATCAGCAGCAATATCTCRCTTTCGGCTTTTTTTAAGGTTTGTTGTGGATCATCGGTATCATTGGGAATGCTGATGATT…	647	2	AT5G13810.1	glutaredoxin family protein		similar to glutaredoxin family protein [Arabidopsis thaliana] (TAIR:AT3G57070.1); similar to Thioredoxin fold [Medicago truncatula] (GB:ABE87618.1); contains InterPro domain Thioredoxin-like fold (InterPro:IPR012336); contains InterPro domain Thioredoxin	90.57	53	5	0	55	213	222	274	1e-26	116
All.Contig_1287	GGATTCCAACCTTCATCAGAAGATACTCGAAGATCGCAACGAGAGAAAAAAAGAACGAAACTTTTGGAGAATGAAAGCAGAGCTGAACTTACCAGCAGGATTCCGATTCCACCCCACGGACGAAGAGCTAGTGAGATTCTGCCTGATCCGTAAATGCGCGTCGGAGCAGATCTCAGCTCCGGTTATCGCCGAAATCGATCTCTACAAGTTCAATCCTTGGGAGCTTCCAGAGATGTCTCTGGTACGGAGAGAAAGAGTGGTACTTTTTCTCACCACGAGACCGGAAATACCCAAACGGCTCGCGTCCTAACCGGGCGGCAGGAACCGGTTATTGGAAAGCCACCGGAGCTGATAAACCGATCGGTAAACCGAAGACGTTGGGTATAAAGAAAGCGCTAG…	1021	2	AT5G08790.1	ATAF2 (Arabidopsis NAC domain containing protein 81)	induced by wounding, belongs to a large family of putative transcriptional activators with NAC domain.	similar to ANAC102 (Arabidopsis NAC domain containing protein 102), transcription factor [Arabidopsis thaliana] (TAIR:AT5G63790.1); similar to NAC-domain protein 3 [Brassica napus] (GB:AAP35049.1); contains InterPro domain No apical meristem (NAM) protein	85.71	84	10	1	661	906	200	283	9e-142	148
All.Contig_1288	GCAGTTAAAAAGCTCGTAGTTGAACCTTGGGATGGGTCGCCCGGTCCGCCTTTGGTGAGCACCGGTCGGCTTGTCTCTTCTGTCGGCGATACGCTCCTGGCCTTAACTGGCCGGGTCGTGCCTCCGGCGCTGTTACTTTGAAGAAATTAGAGTGCTCAAAGCAAGCCTACGCTCTGTATACATTAGCATGGGATAACATCATAAGATTTCGATCCTATTATGTTGGCCTTCGGGATCGGAGTTAATGGGCTTACAGCAAAGCCCAATATCACATCATCTAGGGTTTTCCTCTTATATAGAGCTGCTGTTGTATTTCTTCTCSGACGGTGGTTGCGGCGAGCGAGCAAGCAAGCGAGCAAGCGAGCAAACATCAGAACCGAGAATGCCTAAGCAAATCCA…	740	2	AT3G59540.1	60S ribosomal protein L38 (RPL38B)		Identical to 60S ribosomal protein L38 (RPL38B) [Arabidopsis Thaliana] (GB:O22860;GB:Q1WW90); similar to 60S ribosomal protein L38 (RPL38A) [Arabidopsis thaliana] (TAIR:AT2G43460.1); similar to unknown [Populus trichocarpa] (GB:ABK92931.1); contains Inter	98.41	63	1	0	383	571	1	63	9e-30	127
All.Contig_1289	GGTTTATCGGTTTACTTCTTSGTYCCTTCCTCGATCGTCTCCCTCGCCGATCTCGTTACTTCATTTTCCGCGTTTAATCAGATGGTTGGAGGAGGATTCATCCAGCAAATTCTCAGGAGGAAGCTTCACTCCCAATCACTCGCAACTCCTGTCYTGTCGTTGTTTTCTTCCAAGAAAGTTAATGAGGATGCTGSGTCTTCTGGCGTGAGAGCACTTGCTCTCTTGGGTGCTGGAGTTACAGGGCTGTTGAGTTTCTCTACGGTTGCATCTGCTGATGAGGCCGAACATGGGTTGGCYTGYCCRGACTACCCTTGGCCTCATGATGGCATTCTCAGCTCTTATGACCATGCTTCGATCCGTCGTGGGCAYCAAGTGTATCAGCAAGTCTGTGCTTCTTGC…	519	2	AT3G27240.1	cytochrome c1, putative		similar to cytochrome c1, putative [Arabidopsis thaliana] (TAIR:AT5G40810.1); similar to unknown [Populus trichocarpa] (GB:ABK94651.1); contains InterPro domain Cytochrome c1; (InterPro:IPR002326); contains InterPro domain Cytochrome c, monohaem; (InterPr	94.52	146	8	0	82	519	1	146	1e-51	198
All.Contig_129	GATACCGTATTCTTTTTGATAGCTAATATATACATATATTCAATTAAATAACTTATAAAATATGGTGTGTAAATCAGAGACATCAAACAGGAAATTGAAATCTAAGGAGAAGCAACGGAAAGGATTATGGTCACCGGAAGAAGACGAGAAGCTTAGGAGTTATGTGCTCAAATATGGCCATGTATGCTGGAGCACTATTCCTATTCAAGCTGGATTGCAGCGGAATGGGAAGAGTTGTAGACTAAGGTGGGTTAATTATTTAAGACCTGGGCTTAAGAAGAGTGCATTCACTAAAGAAGAAGAAACCACACTTCTCTCACTCCATTCTATATTGGGTAACAAATGGGCTCATATATCAAAATATTTACCTGGAAGAACCGACAACGAGATAAAAAACTA…	997	2	AT3G48920.1	AtMYB45 (myb domain protein 45); DNA binding / transcription factor	Member of the R2R3 factor gene family.	similar to AtMYB18 (myb domain protein 18), DNA binding / transcription factor [Arabidopsis thaliana] (TAIR:AT4G25560.1); similar to MYB transcription factor MYB94 [Glycine max] (GB:ABH02915.1); contains InterPro domain Myb transcription factor (InterPro:	70.61	262	73	2	62	835	1	261	4e-104	374
All.Contig_1290	GAAGGAAACACACACAAAAATGAAAGTGTTATCTCTGTTTTGCATTTGCGTGGTCATCGTTTTGGTAACAAGAGACAGCAATGCTTTCACAAGAAATGACTTTCCAGAGGATTTCCTCTTCGGAGCTGCCACTTCTGCTTATCAGTGGGAAGGAGCGGTTGATGAAGATGGAAGGACTCCTAGCGTTTGGGATACTTTCTCCCACTCTGATAACAAAGGAAATGGAGATATAGCATGTGATGGTTATCACAAATACAAGGAAGATGTTAAGTTAATGGCAGAAATGGGTTTAGAAGCATTCAGATTCTCTATCTCATGGTCAAGGCTTATACCTAATGGAAGAGGACAAATTAACCCTAAAGGTCTACTGTTTTACAAGAACCTCATCAAAGAACTACG…	1098	2	AT4G27830.1	glycosyl hydrolase family 1 protein		similar to glycosyl hydrolase family 1 protein [Arabidopsis thaliana] (TAIR:AT4G27820.1); similar to hydrolase, hydrolyzing O-glycosyl compounds [Arabidopsis thaliana] (TAIR:AT3G62750.1); similar to glycosyl hydrolase family 1 protein [Arabidopsis thalian	74.67	75	19	0	633	857	208	282	4e-156	124
All.Contig_1291	GAATAAGCGGCGCATCTGAATCCAAACGACGACAAGATGACGACCGATCCACAGCAGAAAACGAGCAAGTTCCGATGGGGAGAGATGGACGAAGACGACGATCTCGACTTCCTTCTCCCTCCCAAGCAAGTGATCGGCCCAGACGAGAACGGATTGAAAACGGTGATCGAGTACAAGTTCAACGAAGAAGGCAACAAGGTCAAGATCACGACCAAGTCACGCGTCCGTAAGCTAGCTTCCGCGCGGCTCAACAAGCGAGCCATGGAGCGGAGGAGCTGGCCTAAGTTCGGAGACGCCGCGAACGAGGACGCTGGGAGCCGTCTCACCATGGTTTCGACCGAAGAGATTCTTCTGGAACGGCCTAGAGCTCCTGGTACCAWAGCAGATGATACAAAGGCA…	1135	3	AT3G11400.1	EIF3G1 (eukaryotic translation initiation factor 3G1); RNA binding / translation initiation factor	One of the 2 genes that code for the G subunit of eukaryotic initiation factor 3 (EIF3).	similar to EIF3G2 (eukaryotic translation initiation factor 3G2), RNA binding / translation initiation factor [Arabidopsis thaliana] (TAIR:AT5G06000.1); similar to unknown [Populus trichocarpa] (GB:ABK92444.1); contains InterPro domain Zinc finger, CCHC-t	79.66	295	60	1	37	921	1	294	6e-114	407
All.Contig_1292	TCAGTGACTCCTCGCGGCTTTACAGCACATCCCAGTACCGTGGGTTCACTTGAATTCTTGGTAGTGCTGTTTGCTATCTACTTGCAGGTTTGGAGCTTTCCCTGATTCAGAAGAGGTTGCTTCCCGTACCCGTCTTTCTGCTTACCGTACTATGCAAGGGTGATTGTGTGGTTGTCTTTGTTGTATGCGGTCTTGGCGTGGTAGCGGAATTTTTCGGCGATTGATCTTCTGGTAAGCTCAGTCGTCTCGTATCCGCTATTTTCGTTTGCACTTCATTGATAGTGTAGATTGCAAGACTAGTAAGTTCATCGAAAACTAGTTACACCGGAAGCGACGTGAGGAGACCCCGGCAACCGAGGAAACGAGGCGAATCTCTCCTCCTCGCGATCCTCGTTGAAG…	539	1	no significant hit
All.Contig_1293	GGTTGGTTGTTGAACCAACCAGTATGCAGAGAAGCCAGCTAAATGGGCAAACCAAAGGGTTGCGGCTCCAATAAACATCCACCAGCCTCGCTGAATAAGAGAGGGAGGACGAGTTGTTGTTAAACTAGTCATACTTGGCTGTATGTGGGCCACTGTACCTTATGTAATTTTCTTATTATGATTAGCTTTCCCACAAGATAACTTGTGCTTTGTACCTTACTGATTATGTTCATTCTCAGATAACAAATGTAGAAACCTAATGAAAAAAGTTGTAAACTCTGAATACAAATGAGAATTACATTTGATTT	308	1	AT2G41430.2	ERD15 (EARLY RESPONSIVE TO DEHYDRATION 15)	Encodes hydrophilic protein lacking Cys residues that is expressed in response to drought stress, light stress and treatment with plant-growth-promoting rhizobacteria (Paenibacillus polymyxa), possibly revealing a connection between responses to biotic an	similar to unknown protein [Arabidopsis thaliana] (TAIR:AT4G14270.2); similar to unknown protein [Arabidopsis thaliana] (TAIR:AT4G14270.1); similar to ERD15 protein [Brassica rapa] (GB:ABV89651.1)	84	25	3	1	20	91	139	163	1e-05	44.7
All.Contig_1294	GGAAAGSACCAGAAWAAAAACCTAAGTAGSCGACCGACGACTAGATGAGGTACTATTCTACAGCTCCTCGTTCTTCTTCGTGCCGTGAGCCATCATCGTCTCCATCGTTWTCATCGCTTCCAGATGAAATCGCTGCGAATTGTTTAGCCCGCGTCTCGAAATCTCAATACCGTTCAMTCAGCTCAGTGTCCAAGGGGTTCTASTCTCTCCTCTCTTCTCCGGAGATATACGCAGCTCGATCTCAAGTCGGAGCCACAGAGCCTCGCCTCTATTTGTGTTGTGAARTCTTARGGACGGCCACCCGKTGTTACAGCTGGTACAATCTCATGAGTCTCGATGATGATGATGATGATGATATAACCAARAAAGGAGACGCCTTTGTCAGCATAGAGGGGGCTG…	593	2	AT4G35120.1	kelch repeat-containing F-box family protein		Identical to Putative F-box/Kelch-repeat protein At4g35120 [Arabidopsis Thaliana] (GB:O49618); similar to kelch repeat-containing F-box family protein [Arabidopsis thaliana] (TAIR:AT4G19870.2); similar to kelch repeat-containing F-box family protein [Arab	47.17	159	84	4	117	593	30	158	1e-14	76.6
All.Contig_1295	GGTTGTGGCATTGATGTCTGATCAGAAGGAAGGGGATTTGAGAATGGAGGAGCTGAAGATTCTGACATCAAAGGAGTCTAAAACCGAGAACACCCAATATTCTCTCCAACTCTGGCCTGACAGGAAAGTGCAACAGATTACAAACTTTCCTCATCCTTATCCACAGTTGGCTTCGTTACAGAAAGAGRTGATCAGGTATCAACGAAAAGACGGGGTTCAACTTACTGCGACACTATACCTACCACCAGGCTATGATCCATCAAAAGATGGTCCTCTGCCTTGTCTGTTTTGGTCTTATCCCGGTGAATTCAAGAGCAAAGATGCTGCTAGTCAAGTTCGTGGCTCTCCAAATGAATTTGCAGGCATTGGTTCAACTTCTGCCCTTCTTTGGCTTGCTAG…	708	2	AT2G47390.1	serine-type endopeptidase/ serine-type peptidase		similar to hypothetical protein OsI_010936 [Oryza sativa (indica cultivar-group)] (GB:EAY89703.1); similar to unnamed protein product [Vitis vinifera] (GB:CAO40114.1); similar to hypothetical protein OsJ_010143 [Oryza sativa (japonica cultivar-group)] (GB	96.6	235	8	0	2	706	593	827	3e-120	427
All.Contig_1296	GGAAGCAAACGGAGAGGATCCAAGCCATGAAGCTGAGGAAAGCAGCGTTGGATGCGATCCAAGAACGTGGAAGCTCGGTTAAGGATATTGATGGATTCATCGAGCATCTTGTTAGCTTAGGACTRAAGAAATGATCCAACCAGATATTGTATGCATGTGACTGCACTCTATTTAGGCTGTAACTGGAATGCTTTTTTTATGAATGGAATTATTASSAAGATATTATGTTGATGTTTATCTTAATAGAGTTGTATATATCTCTTATAGATAAGTTCTATTTGTCCTAATCTCCTAAGGTTTAGGAGGTCTACGTCCTGTATATAAACAAGAGCAATTGCTCTCTACAATGTCAAGTTAATAGTTTCAC	367	2	AT1G73880.1	UDP-glucoronosyl/UDP-glucosyl transferase family protein		similar to UDP-glucoronosyl/UDP-glucosyl transferase family protein [Arabidopsis thaliana] (TAIR:AT1G51210.1); similar to UDP-glycosyltransferase 89B2 [Stevia rebaudiana] (GB:AAR06921.1); contains InterPro domain UDP-glucuronosyl/UDP-glucosyltransferase;	80.95	42	8	0	6	131	432	473	2e-13	70.9
All.Contig_1297	GGCGTGAAACAACAAAAAAACAAATAAAAGAGAGATTGTTCTCCTCCGTCCGAGAACCGATCATAGTACGAAGGATTACACTCAAAGATCGGCGGTGATGCAGAGAACAAGAAGACGATGCGAAGGCACCGCCATGGGCGCCACCGTCTTCGATCTCCGACCCGGAGTCGGCATCGGACCTTTCTCCATCGGAATGCCAATTTGTGATGCATTTGCGCAAATAGAGCAACAACCTAACATATACGACGTCGTCCATGTTAAATACCACGACGAGGATCCTCTGAAATTGGATATTGTTATTAGCTTTCCGGATCATGGTTTTCATCTACGGTTCGATCCTTGGTCTCAGAGGTTACGCCTGGTTGAGATATATGATGTAAAGCGGCTYCAGATGCGTTA…	1097	3	AT3G51130.1			Identical to UPF0183 protein At3g51130 [Arabidopsis Thaliana] (GB:Q9SD33;GB:Q53YG9;GB:Q8LD70;GB:Q94C31); similar to unnamed protein product [Vitis vinifera] (GB:CAO48256.1); similar to Os06g0714000 [Oryza sativa (japonica cultivar-group)] (GB:NP_001058570	80.29	208	41	0	474	1097	138	345	6e-96	347
All.Contig_1298	CAGATTTGTCCAGGAGCAAATCAAGGATCAAGTTGCGAACATGTATCTCTGGCCTAAGACCCTTGTAGTTCCAATTCTTGACCCTGCCAAAGCGTTTAGAAGGCCGGTTGGAATCGTACATGTGAAAGTCGTGAGGGCTGTTGGGCTGAGGAAGAAAGATATGATGGGTGGGGCAGACCCATACGTGAAGATCAAGCTCTCTGAAGACAAGATTCCATCTAAGAAGACCACTGTCAAACACAAGAATTTGAACCCTGAATGGAACGAGGAACACAAATTCTCAGTCAGAGATCCCCAGACTCAGGTCCTCGAGTTCAGTGTGTATGACTGGGAACAGGTTGGAAAGCACGATAAGATGGGTATGAATGTACTACCGCTGAAAGAAATGGTGCCTAACGA…	1064	2	AT2G20990.1	ATSYTA/NTMC2T1.1/NTMC2TYPE1.1/SYTA		similar to ATSYTB/NTMC2T1.2/NTMC2TYPE1.2/SYTB [Arabidopsis thaliana] (TAIR:AT1G20080.1); similar to unnamed protein product [Vitis vinifera] (GB:CAO47374.1); similar to unnamed protein product [Vitis vinifera] (GB:CAO60961.1); similar to hypothetical prot	92.77	318	23	0	2	955	224	541	9e-174	606
All.Contig_1299	AAGCAGTGGTATCAACGCAGAGTGACCATTACGGCCGGGGGAAKAAGCTTATCTACGTACGTTGTTCATCTCTTAATCATTAYCCTAATCCAATTTCTTAATCCCAAAAACTCTTTCAAGAACTGGATACTCTGGCGGATTCTGAGAGCAAGAACCGAGACGTGGTTCTGAAGCTGTATGACGCCCTGAGATCTCGCGACGTCGACTCCGTTCACCGGACCCTAACCCCGGACCTCGACTACTGGTTCCACGGCCCTCCGCCGCACCAGTTTTTGATGCGCACGCTCACCGGCGTCTCTCCGCCGTTTCAATTCTCGCCTCTCTCCGTCGTCTCCTTCGGGTCCACCGTCATCGCCGAGGGCTGCGACGCCGCCAGCTCCGTCTCCTGGATCCACGCCT…	787	2	AT3G10985.1	SAG20 (WOUND-INDUCED PROTEIN 12)	A senescence-associated gene whose expression is induced in response to treatment with Nep1, a fungal protein that causes necrosis.	similar to unknown protein [Arabidopsis thaliana] (TAIR:AT5G01740.1); similar to elicitor inducible protein [Nicotiana tabacum] (GB:BAB13711.1); similar to wound-induced protein WI12 [Mesembryanthemum crystallinum] (GB:AAD23999.1); contains InterPro domai	80.91	110	15	4	276	587	1	110	1e-40	163
All.Contig_13	GAACGAGATACTGTATGGGGTTTCCTCTTTTTGCCAATTAATCTCCCATTAACTCGTGTAGGAAAATCAAATAGGATAGCGTATAATACGTTTGCCAAGAGTACCTATATATACTTTTGTTTCTATGAAGTCAAGGAAGTGAAAATAGTTCGAATCCAACCAAGTAAAGAGGATGTTTCAAAAAAAAAGATCAAATTAGTCTTCCCTAATGAATATGCTCTTTTTAAAGATTAGAGTCGATGTCGAAGAAAAACTCGTAAGAAAATTTAATATAGTTAATTTTTTGGAATATTTTAGTTTTTTTTTATCGGGACTCGTCTTTATCACATTTCCTTTGTTTTACAAAAAGATCATAGACCCTTACAAAAACAAAATTTTGAAAATTTCAATTTGAAATTT…	967	28	ATCG00220.1		PSII low MW protein	Identical to Photosystem II reaction center protein M (psbM) [Arabidopsis Thaliana] (GB:P62109;GB:P12169); similar to photosystem II M protein; psbM [Oryza sativa (japonica cultivar-group)] (GB:AAS46110.1); contains InterPro domain Photosystem II protein	97.06	34	1	0	827	928	1	34	8e-11	64.7
All.Contig_130	GACCTATCAAATTCTCTCATTCTTAGTATASACATCAAAGCATCACACACACAYACAAACACACACTTTCTCTTCTCTTCTTTTGATCTTTTCCTCTTTTCTACACATTCAAATGGCCACTGCTGATGTTGAACAAGTGACTCCAGCCGCAGCTGAGCACGTCGAGATGACACCACCAAAGACAGTGGAGCCTGAGGAAACCGCCGCCGCCGTTGTGACCGAGTCTGCTCCATKCTCAGGTAACAGTAAACTGAAKCTCCYGTGGAAGAAACAGAGAAACCAACCGAAGAAGCAGATGAAACCAAAACCGAGACGAAAGAGGAAGAAGCTCCAGTCGAAGTAACCACAAAAGACCTCCCCGTCGAAGAAACAGAGAAACCAGCTGAAGAAACAGAGGAG…	726	2	AT1G62480.1	vacuolar calcium-binding protein-related		contains domain PTHR22683 (PTHR22683)	75	16	4	0	113	160	1	16	9.6	27.3
All.Contig_1300	GGTCAATTTAATTTTATTTATAACCTCTCTCTCAGGACGCTCTCTCACCCCATTCCTCGCATTGACTATCGTCTCGTTCTCTCTCTCACCGGAAGTAGAAAGCCAACGATGTCTGCAACACAGGAAGAAGACAAGAAGCCCGGTGGTGACGGAGGAGTTCACATCAATCTCAAGGTCAAGGGTCAGGATGGGAATGAGGTGTTCTTCAGGATCAAGAGAAGCACTCAGCTGAAAAAGCTGATGAATGCTTACTGTGACAGGCAATCTGTGGACATGAACGCCATTGCCTTCTTGTTCGATGGGCGTCGTCTGCGTGCTGAGCAGACTCCCGATGAGCTTGACATGGAGGACGGTGATGAGATCGATGCCATGCTCCATCAGACCGGTGGCTGTGGTGGT…	584	2	AT4G26840.1	SUM1 (SMALL UBIQUITIN-LIKE MODIFIER 1)	Encodes a small ubiquitin-like modifier (SUMO) polypeptide that becomes covalently attached to various intracellular protein targets, much like ubiquitination, leading to post-translational modification of those targets.	Identical to Ubiquitin-like protein SMT3 (SMT3) [Arabidopsis Thaliana] (GB:P55852;GB:Q9SZ24); similar to SUM2 (SMALL UBIQUITIN-LIKE MODIFIER 2) [Arabidopsis thaliana] (TAIR:AT5G55160.1); similar to Os01g0918300 [Oryza sativa (japonica cultivar-group)] (GB	95.65	92	4	1	109	384	1	91	4e-45	177
All.Contig_1301	TAGTGAGTACCCACTCAAAGAAATGATTGAGTTTCACAAAGCTCACGGTGGGGAAGCCTCCATTATGGTGACAAAGGTTGATGAACCGTCCAAGTATGGAGTTGTGGTCATGGATGAAACTACAGGAAAGGTTGAGAAGTTTGTGGAAAAGCCTAAACTCTTTGTAGGTAACAAAATCAACGCTGGGATTTACCTTCTGAACCCATCGGTTCTCGACAAGATCGAGCTAAGACCGACATCAATCGAGAAAGAGACCTTCCCCAAGATTGCAGCAGCTCAAGGGCTCTACGCAATGGTGCTACCAGGATTCTGGATGGACATTGGGCAACCCCGTGACTACATAACAGGCCTGAGACTCTACCTAGACTCTCTGAGAAAGAAGTCTCCCGCCAAGCTAAC…	695	2	AT2G39770.1	CYT1 (CYTOKINESIS DEFECTIVE 1); nucleotidyltransferase	Encodes a GDP-mannose pyrophosphorylase/ mannose-1-pyrophosphatase. This enzyme provides GDP-mannose, which is used for cell wall carbohydrate biosynthesis and protein glycosylation as well as for ascorbate (vitamin C) biosynthesis.	similar to GDP-mannose pyrophosphorylase, putative [Arabidopsis thaliana] (TAIR:AT3G55590.1); similar to GDP-mannose pyrophosphorylase [Malpighia glabra] (GB:ABB53473.1); similar to unnamed protein product [Vitis vinifera] (GB:CAO69137.1); similar to GMPa	94.37	231	13	0	2	694	114	344	2e-126	448
All.Contig_1302	GATTGCTGCTATTGAGACTTGGGACAATGGGAAGCCTTTTGAACAGTCTTCCAAGATTGAAGTCCCTATGCTTGCTAGGGTGTTCCGTTACTATGCTGGTTGGGCAGACAAGATCCATGGAATGACGGTTCCAGGAGACGGTTCACACCATGTGCAGACACTCCATGAGCCTATTGGAGTCGCTGGACAGATCATCCCATGGAACTTCCCTCTTCTCATGCTTTCTTGGAAACTTGGACCAGCTTTAGCTTGCGGTAACACCGTTGTCCTCAAGACGGCTGAGCAAACTCCTCTATCTGCTCTTCTTGTTGGACGACTACTTCACGAGGCTGGACTTCCGGAAGGAGTTGTGAATATAGTGTCTGGATTTGGTCCTACAGCTGGTGCAGCCATAGCTAG…	1164	2	AT1G23800.1	ALDH2B7 (Aldehyde dehydrogenase 2B7); 3-chloroallyl aldehyde dehydrogenase/ aldehyde dehydrogenase (NAD)	Encodes a mitochondrial aldehyde dehydrogenase; nuclear gene for mitochondrial product.	Identical to Aldehyde dehydrogenase 2B7, mitochondrial precursor (ALDH2B7) [Arabidopsis Thaliana] (GB:Q8S528;GB:Q94C67;GB:Q9ZUB6); similar to ALDH2B4 (ALDEHYDE DEHYDROGENASE 2), 3-chloroallyl aldehyde dehydrogenase/ aldehyde dehydrogenase (NAD) [Arabidop	93.28	387	26	0	2	1162	135	521	0	738
All.Contig_1303	GAGACAAGATCTGAATTTTTATTTCAGTTTCTTCTGTGAGGAAGAAGAATAAGGGAGGAGAATCATGTTTTTGTTCGATTGGTTCTACGGAATCTTGGCGTCGTTAGGGCTATGGCAGAAAGAAGCGAAGATCTTTCTTGGACTCGACAATGCAGGGAAGACCACGCTACTTCACATGCTCAAAGACGAGAGATTGGTTCAGCACCAGCCGACACAGCATCCAACGTCCGAGGRWCWTAGYWTWGGMRRAATCAAGTTCAAGGCTTTTGRTTTRGGTGGCCATCAGATTGCTCGWAGAGTTTGGAAAGATTACTAYGCCRAGGTTGATGCAGTTGTCTACCTMGTGGATGCTTAYGACAAGGAGAGATTTTCAGAGTCAAARARAGAGCTAGACGCTCT…	775	2	AT1G56330.1	SAR1 (SECRETION-ASSOCIATED RAS); GTP binding	Encodes a small GTP-binding protein implicated in ER to cis-Golgi transport of other proteins. A member of ARF-like GTPase family. A thaliana has 21 members, in two subfamilies, ARF and ARF-like (ARL) GTPases. The protein is found associated to the ER	Identical to GTP-binding protein SAR1B (SAR1B) [Arabidopsis Thaliana] (GB:Q01474); similar to ASAR1 (Arabidopsis thaliana secretion-associated RAS super family 2), GTP binding [Arabidopsis thaliana] (TAIR:AT4G02080.1); similar to GTP-binding protein SAR1B	90.77	195	17	2	65	646	1	193	6e-73	270
All.Contig_1304	GGTATGGAGATTTAAAAAGGATAGCAGAGACAAAGATTGGAGTTGTGACGCAGTGCTGCTTATACCCTAACATAACTAAGCTTAACTCTCAGTTTGTTTCAAACTTGGCTCTCAAGATAAACGCCAAGATCGGTGGAACCATGTCCGAGCTCTACAACTCAATACCTTCTCACATCCCTAGGTTGTTTAGACTCGACGAGCCGGTGATCTTCATGGGAGCTGATGTAACGCATCCTCATCCGTTTGATGATTGCAGCCCTTCTGTTGCGGCTGTGGTCGGGAGCATAAACTGGCCTGAAGCTAACCGATACGTCTCGAGAATGAGGTCTCAGACTCATAGGCAAGAGATCATTCAAGATCTTGACGTGATGGTCAAGGAACTTCTTGAAGATTTCCACA…	1035	2	AT1G48410.2	AGO1 (ARGONAUTE 1)	Encodes an RNA Slicer that selectively recruits microRNAs and siRNAs. There is currently no evidence that AGO1 Slicer is in a high molecular weight RNA-induced silencing complex (RISC). Mutants are defective in post-transcriptional gene silencing and ha	Identical to Protein argonaute (AGO1) [Arabidopsis Thaliana] (GB:O04379;GB:Q9LP83); similar to argonaute protein, putative / AGO, putative [Arabidopsis thaliana] (TAIR:AT2G27880.1); similar to ZLL (ZWILLE) [Arabidopsis thaliana] (TAIR:AT5G43810.1); simila	48.88	178	78	2	3	497	691	866	1e-92	166
All.Contig_1305	GGGAGAAACACAAGTCTTCTTCTCACACAAGTTGACAGATAAACTACAATCCTCTACTTTCTCTGAGTTCCTTTTCTTGTTCAGACATTAAAGAACCAAGTGAGTTTTGTCTACCTTATTCCTTAGAAGTAAAGAAGATGCAGGTCGTCGCCAACTTCGATTTCCAGCCTTCGCCGTTCTCTCACGCCACCGGTGAGATGCTCATTTCTCCGGTAGGCCACCGGGACGAATCTTTCGTTAACTTCACCGACGCGCTTGAAGGCGCCAGTGATGACTCGCCTCCTAGCGTGGCCGCGGTGAAAGTACAGAAGGTTTACAGGAGTTATCGCACGCGCCGGAGATTAGCGGACTCCGTAGTTGTCGCCGAAGAGCTCTGGTGGCAAGCGATGGATTATGCGA…	974	2	AT3G52870.1	calmodulin-binding family protein		similar to calmodulin-binding family protein [Arabidopsis thaliana] (TAIR:AT3G13600.1); similar to unnamed protein product [Vitis vinifera] (GB:CAO15941.1); contains InterPro domain IQ calmodulin-binding region (InterPro:IPR000048)	88.17	279	33	2	138	974	1	276	9e-141	496
All.Contig_1306	GTACACTCTCAAAGCTGGCGGCCTTATGAAAGAATCAGACTATCCTTATACAGGACACGACAATTCCGGCTGCAAGTTCGACAAGAGCATGATCGCTGCAAGAGTGTCTAATTTCAGCGTTGTCTCTGCCGATGAAGACCAAATTGCTGCAAATCTAGTCCACCACGGTCCTCTTGCTATTGCTATCAATGCAATGTGGATGCAAACTTACATAGGAGGAGTCTCGTGCCCGTATATATGTTCTAAGAGCCAAGACCATGGAGTGCTCTTGGTTGGGTTTGGTTCGTCGGGTTATGCACCAATCCGTCTCAAGGAGAAGCCTTACTGGATCATAAAGAACTCATGGGGATCGACGTGGGGGGAGGATGGTTACTACAAAATCTGCAGGGGACGTCATAA…	655	2	AT4G16190.1	cysteine proteinase, putative		similar to RD19 (RESPONSIVE TO DEHYDRATION 19), cysteine-type peptidase [Arabidopsis thaliana] (TAIR:AT4G39090.1); similar to unknown [Populus trichocarpa] (GB:ABK92924.1); contains InterPro domain Peptidase C1A, papain; (InterPro:IPR013128); contains Int	88	150	18	0	2	451	222	371	2e-77	285
All.Contig_1307	ACGGTTGGTGATGCAAGAGATGATTGGAAGATTGTGAGAGCTTTGTCCGAGGTCTCGGGTGTGAATCTTCCATACAACTCAATAGAAGGTGTTAGATCGAGGATCAGGAGCGTCGCACCAAATCTAGTCCACACAGATGAACGAGAGCCAGCTGCTTTTGGGCCATCGTTGAAACCTGAGTGCAAGGAGACAATGAGCACAACGCCGTTCAAACCAGTGGTCGAGAATTTTTACATGACAAACGCCATCACGAGAGCATCAAAGATCATGGCACAGTGCAGTGCTGTYCTCTTGAAGAAGTGAGAGCTTTCTCTGTTTCACTTTTTTTTGTTTGCAAAAAAAAATAAAGGTACCGAGTATTTGTTTGCTCTCTTTATTAAGGCCAAGTATCTGATTGTC…	438	2	AT5G37510.2	EMB1467 (EMBRYO DEFECTIVE 1467); NADH dehydrogenase	Encodes a subunit of the 400 kDa subcomplex of the mitochondrial NADH dehydrogenase (complex I). The protein has been isolated in the male gametophyte.	Identical to NADH-ubiquinone oxidoreductase 75 kDa subunit, mitochondrial precursor [Arabidopsis Thaliana] (GB:Q9FGI6;GB:Q940B1); similar to hypothetical protein OsI_012866 [Oryza sativa (indica cultivar-group)] (GB:EAY91633.1); similar to NADH-ubiquinon	94	100	6	0	1	300	646	745	3e-49	190
All.Contig_1308	AGGTTTGTTCAAGAAGAACTTTGAGACTTTTGCTAACCACAAGATTGGTGTGGATGGTAAGCTCACGGAGGAGATTCTCGCTGCTGGTCCTATCTTTTAAGAGAAAACTCCTATCATGTTGTCCAAACAAACAAGAAGATATTATCAAGAATAAAATGYGACTTGTGTGTTGTATCTCTTTGTCCGAGTTATTTTATATGAAGTGGTTACTTTCGAGCAAAAGAACTTCCAAATRTGGTGGATATGAAATATGACCTTATGTTATTTGATTTTCATATATTGTCGTC	287	2	AT4G37870.1	PCK1/PEPCK (PHOSPHOENOLPYRUVATE CARBOXYKINASE 1); ATP binding / phosphoenolpyruvate carboxykinase (ATP)	Encodes a putative phosphoenolpyruvate carboxykinase (ATP-dependent).	Identical to Phosphoenolpyruvate carboxykinase [ATP] [Arabidopsis Thaliana] (GB:Q9T074); similar to PCK2/PEPCK (PHOSPHOENOLPYRUVATE CARBOXYKINASE 2), ATP binding / phosphoenolpyruvate carboxykinase (ATP) [Arabidopsis thaliana] (TAIR:AT5G65690.1); similar	96.88	32	1	0	2	97	640	671	3e-12	66.6
All.Contig_1309	GGTTCAAACAAAGAGAGAATTAAAATAACTAAAAAAATCACGTGCTGGTGCTTCACCTCCTCCTCCTCCGCCGCTTCTCCTCCGTGAAAATTGCATTAATTCAAAATCTTCTGATTACAAACCCTAAATCCTCTCTCTCKCTCTCTCTCTCTCTCTCYCTCTCTCTCTCCTAAAATGTTCTTGTCGTCTTCTCATTCTCAAATCCACTTTAAAAAAAAAAACACAATCATCCAYCCAGTCAACCAAATCTAGATCAAAGTTTGAAACTTTTTTTAAAATTTCAATTAATTAGTTTCAGCAAAAAAA	306	2	no significant hit
All.Contig_131	GGAGAAACGAGAAACGACGATGGCGACGARTCTCCTGAAACTCTCCTCTCAAATCCGCCGCCTCTCTCCACTCACCAGATCCCTAACCGTCCGCACCTCCGCCACATCCACCGGATCGAAGAAAGTCTCCGAYCGAATCGTCAAGCTCTCCGCGATCGACGCCGACGGAGACAAGAAGGACATCATCGGCCTCTCCGGCCAGACTCTCCTCCGCGCGCTCACCCACACCGGCCTGATCGATCCGCTGTCGCATCGCTTGGAGGATATCGACGCTTGCTCGGCCGAGTGCGAGGTCCAGATCGCTGAGGAATGGCTCGAGAAGCTTCCTCCGCGTACCTACGACGAGGAGTACGTGCTGAAGCGTAACTCGAGATCACGTGTGCTGAACAAGCACTCGCG…	689	2	AT3G07480.1	electron carrier/ iron-sulfur cluster binding		similar to unknown [Populus trichocarpa] (GB:ABK94264.1); contains InterPro domain Beta-grasp fold, ferredoxin-type (InterPro:IPR012675); contains InterPro domain Ferredoxin; (InterPro:IPR001041)	88.05	159	14	1	20	481	1	159	7e-66	246
All.Contig_1310	TCATCCACGGAGCAGGACACGTGGATCCGAACAAAGCCTTGAACCCTGGGTTGGTTTACGACATCGACGTCAAAGACTACGTGGCATTCCTCTGCGCCGTGGGATACGAGTTCCCGGGGATTCTAGTGTTCCTTCAAGATCCAACTCTTTACAACGCCTGCGAGACGAGCAAGCTAAGAACCGCCGGCGATCTCAATTACCCGTCGTTCTCCGTCGTTTTCGGATCGACAGTCGATGTTGTGAAGTACAGAAGGGTTGTTAAGAACGTTGGAACCAACGTTGACGCGGTGTACGAAGTCGGGGTTAAGTCTCCGGCGAATGTGGAGATCGATGTGTCTCCGAGGAAGCTTGCGTTTAGCAAGGGGGACTAGGCGAGWTGGARTACGAAGTGACGTTTAR…	728	2	AT3G14067.1	subtilase family protein		similar to ARA12, subtilase [Arabidopsis thaliana] (TAIR:AT5G67360.1); similar to subtilase family protein [Arabidopsis thaliana] (TAIR:AT2G05920.1); similar to subtilase family protein [Arabidopsis thaliana] (TAIR:AT3G14240.1); similar to unnamed protein	92.5	120	9	0	3	362	602	721	2e-75	228
All.Contig_1311	CAGCTGCAATCGGGCAATTCCGTATCTGGGTTTTACTAAAAATCAAACCTTTAGAGCTCTTGTAATCCGAATCGAAGAGAAGATGGTGGGTGGTGGAAACAGGAGAGACGAAGGATCGATGCCGATTCAGAACACCAACTTGTTCGCGGCTTTGGATACTCGGAGGAAGAAGAAGAAGTCTGATAAGAGCAAAGGACGTCAAGATCCGGTGAAGGAGCCTGAGCCGCAGGTGTTCTGGGCTCCTACGCCTCTGAAAGCTAAGGCTTGGGCGGATATCGACGGCGACGATGAAGATGATGACTATTTCGCTACCACTGCTCCGCCYMAGGCCTTGTGGARTRCYTCTGAAGCGTCYCGYTCGGATGYGAARGAGRYTCACGTTGAGGAAAGTGAAAGTGA…	644	2	AT4G32610.1			similar to unknown protein [Arabidopsis thaliana] (TAIR:AT2G25670.2); similar to unknown protein [Arabidopsis thaliana] (TAIR:AT2G25670.1); similar to unnamed protein product [Vitis vinifera] (GB:CAO44124.1)	69.04	197	51	2	83	643	1	197	2e-33	139
All.Contig_1312	GGCCGGGGAAAAAAAAAAAAAAAAATCTCTCTCGAGACAGACACACTGACACATCAATGGCGCCTTCTTCCTCGAGCGGCCTGACCTTCAAGCTCCACCCTCTGGTGATGCTCAACATCTCCGATCACTTCACTAGAGTCAAAACTCAGCTCAATCCCCCAGCCTCTTCCTGCGCGACGGGCAATAATAACCCCAGCACCGGCGACGCGACGATCCCTCAGGATTTTAGGGTTTATGGGTGCGTGATCGGTGCCCAGAAAGGTCGGACGGTTGAGATCTTCAACAGCTTCGAGCTTTTGTTGGATCCCACTACTGACACCCTCGATAGATCCTTCTTAGAGAAGAAGCAAGAGCTCTATCAGAAGGTGTTTCCTAACTTCTATATATTGGGATGGTACT…	1264	2	AT4G26430.1	CSN6B (COP9 SIGNALOSOME SUBUNIT 6B)	one of two genes encoding subunit 6 of COP9 signalosome complex	Identical to COP9 signalosome complex subunit 6b (CSN6B) [Arabidopsis Thaliana] (GB:Q8W1P0;GB:O65591;GB:Q8RXW5;GB:Q8W205); similar to CSN6A (COP9 SIGNALOSOME SUBUNIT 6A) [Arabidopsis thaliana] (TAIR:AT5G56280.1); similar to unnamed protein product [Vitis	84.59	318	49	1	57	1010	1	317	3e-147	518
All.Contig_1313	GGTGGCTCTCCGATCAGGATCAGATTTCTCCGTATTCTACGGCTGTTCTTTCAAAGGCTACCAAGACACTCTCTACCTTCACTCCCGCCGTCAGTTCTTGAAAAACTGCAACGTCTACGGAACCGTCGACTTCGTCTTCGGAGACGCAACCGCAGTCCTCCAAAACTGCAACATCTACGCTCGTAAACCCATGAGCGGCCAGAAAAACACTATCACGGCTCAGTCCCGCAAAGATCCTAACGAGAACACAGGTTTCGTCATCCAGAGCTCGACGGTGTCTACAGCGGCGGAGACGTACTTAGGAAGGCCGTGGAAGCAGTATTCGAGGACGGTTTTCATGAAATGCAGTCTCGGAGAGATGCTAAATCCGGCGGGGTGGTTGCCTTGGAGCGGCGACTT…	778	2	AT1G23200.1	pectinesterase family protein		similar to pectinesterase family protein [Arabidopsis thaliana] (TAIR:AT2G45220.1); similar to unnamed protein product [Vitis vinifera] (GB:CAO42327.1); contains InterPro domain Pectin lyase fold (InterPro:IPR012334); contains InterPro domain Pectinestera	85.71	196	28	0	2	589	359	554	1e-101	365
All.Contig_1314	GCGAAAGCACTCTGCTGGGCCGACACTGACACCGAGAGACAGAGAGAGAGAGMGAGAGASAGAGAGAGAGAGAGAGAGAGAAGAAATGGCTGCTTCAGTGATGCTTTCATCGGTTACGTTGAAACCTGCGGGTTTCACGGTGGAGAAGATGTCGGTGAGAGGATTGCCGTCGCTCACAAGAGCTCCTTCTTCCTTCAAAATCGTCGCTAGTGGCGTTAAGAAGATCAAGACCGACAAGCCTTTTGGTGTTAACGGCAGCATGGACTTGAGGGATGGCCTCGACGCCTCCGGCAGAAAGGGCAAGGGATATGGTGTTTACAAATTCGTTGACAAGTACGGAGCTAACGTGGATGGATACAGTCCTATCTACAACGAGGACGAGTGGTCAGCAAGTGGTGA…	762	21	AT1G79040.1	PSBR (photosystem II subunit R)	Encodes for the 10 kDa PsbR subunit of photosystem II (PSII). This subunit appears to be involved in the stable assembly of PSII, particularly that of the oxygen-evolving complex subunit PsbP. Mutants defective in this gene have reduced amounts of subunit	Identical to Photosystem II 10 kDa polypeptide, chloroplast precursor (PSBR) [Arabidopsis Thaliana] (GB:P27202); similar to Photosystem II 10 kDa polypeptide, chloroplast precursor (GB:P49108); contains InterPro domain Photosystem II protein PsbR; (InterP	93.57	140	9	0	86	505	1	140	1e-63	239
All.Contig_1315	GGAAGCTCTCGTCATTGGTCGAGCAACCGGTCGGTTTTCACTTTCAGGAGAAGAAGAACAAAACCCGAAACCAGATTCGCCTCTCTCTCTCTCTCTCTCTCTCTCTCTCTGTGCAAAACCGAGACGTTGTCGGAATCGCACTTCTTCTTCTTCTTGTTCAATCCACAATCAGTAGTTCGAAATTCAAGAAAGATGGTGGTGTCGCCAAAGATAGCTCCTTCAATGCTGTCTTCGGACTTTGCAAATCTAGCCGCAGAGGCCAAGCGTATGGTTGATTTGGGCACTGACTGGCTTCACATGGACATCATGGACGGGCATTTTGTCCCGAATCTAACGATTGGTGCTCCTGTCATCGAGAGTTTGAGAAAGCACACAAGTGCATATCTTGATTGCCACCTA…	1427	3	AT3G01850.2	ribulose-phosphate 3-epimerase, cytosolic, putative / pentose-5-phosphate 3-epimerase, putative		similar to ribulose-phosphate 3-epimerase, cytosolic, putative / pentose-5-phosphate 3-epimerase, putative [Arabidopsis thaliana] (TAIR:AT1G63290.1); similar to unknown [Populus trichocarpa] (GB:ABK96131.1); contains InterPro domain Ribulose-phosphate bin	90.62	224	21	0	196	867	1	224	4e-116	415
All.Contig_1316	GGAAGATGCTAAGTGCCACTCCACTGTTGTCTCTGGATGGTTCTCCGAACCTCCTCACCTTCGCTCTGGGAAAAGAGGCAAAGCAGTGTATTTCAATAACCCTATGTGGCCAGGAGAAGCACACTCACTGAAAGTTGAGAAAGTTCTATTCAAAGACAAGTCAGACTATCAGGAAGTCCTAGTGTTTGAGTCAGCTACCTATGGGAAAGTGCTTGTTCTAGATGGTATTCTACAGCTGACTGAAAAAGATGAATTTGCATATCAGGAGATGATAGCCCATCTACCTCTATGCTCCACACCTTCACCTAAAAATGTCCTGGTTGTTGGTGGAGGTGATGGTGGTGTTCTGAGGGAGATTTCTCGYCATAGCTCTGTTGAGGTTATTGACATYTGTGAGAT…	1042	3	AT5G53120.5	SPDS3 (SPERMIDINE SYNTHASE 3)	encodes a novel spermine synthase and is a paralog of previously characterized spermidine synthases, SPDS1 and SPDS2. SPDS3 forms heterodimers with SDPS2, which in turn forms heterodimers with SDPS1 in vivo. The gene does not complement speDelta3 deficien	similar to SPDS1 (SPERMIDINE SYNTHASE 1) [Arabidopsis thaliana] (TAIR:AT1G23820.1); similar to spermine synthase [Malus sylvestris] (GB:BAE19758.1); contains InterPro domain Spermine synthase; (InterPro:IPR001045)	93.59	312	19	2	2	934	43	353	9e-160	559
All.Contig_1317	GACTCACTTGACTATCTTCACRYTCKGAGCTTAGCTTTCTCTCTCGATCTCATCGCCATGGCTGACAACAAGAAGATTAAGATCGGAATCAACGGTTTCGGAAGAATCGGTCGTTTGGTGGCGAGAGTKATCCTTCARAGGAACGATGTTGAGCTCGTCGCTGTTAACGATCCTTTCATCACCACCGAGTACATGACGTACATGTTTAAGTATGACAGTGTTCACGGTCAGTGGAAGCACAATGAGCTTAAGATCAAGGATGAGAAAACTCTTCTCTTTGGTGAGAAGCCAGTCACCGTTTTTGGCATCAGGAACCCTGAGGATATCCCATGGGGTGAGGCTGGTGCTGACTTTGTTGTGGAGTCTACTGGTGTTTTCACTGACAAGGACAAGGCYGCT…	1336	13	AT3G04120.1	GAPC (GLYCERALDEHYDE-3-PHOSPHATE DEHYDROGENASE C SUBUNIT); glyceraldehyde-3-phosphate dehydrogenase	encodes cytosolic GADPH (C subunit) involved in the glycolytic pathway but also interacts with H2O2 potentially placing it in a signalling cascade induced by ROS.	Identical to Glyceraldehyde-3-phosphate dehydrogenase, cytosolic (GAPC) [Arabidopsis Thaliana] (GB:P25858;GB:Q42352;GB:Q9M8W8); similar to GAPC-2, glyceraldehyde-3-phosphate dehydrogenase [Arabidopsis thaliana] (TAIR:AT1G13440.1); similar to Glyceraldehy	96.76	339	11	1	58	1074	1	338	3e-177	618
All.Contig_1318	GCTCTCCTASWAMAAAAAAAAAAAAAAAATTTCTTCTTTCTCTTTGACATAAAAAAAAAAACTCTTTCTGTGTCTCCTCTCTTCAAGTTCAACACCAATGGATTACGAGGTATCAAGAACTGGTGAGATCATAGAAGATTCAGAGCAGATTGATTTGCTACCTGGATTCAGATTTCACCCAACAGATGAAGAACTCATAAGCCACTATCTTAGACCGAAGGTTCTAAACACCCTCTTCTCYGCTGTAGCCATTGGTGAAGTTGATCTCAACAAGGTTGAGCCTTGGGACTTGCCATGGAAGGCTAAGATTGGTGAAAAGGAGTGGTACTTCTTCTGTGTAAGAGACCGGAAATACCCAACCGGTTTAAGGACGAACCGGGCTACTAGGGCCGGTTATTG…	1023	3	AT3G29035.1	ANAC059/ATNAC3 (Arabidopsis NAC domain containing protein 59); protein heterodimerization/ transcription factor	Encodes a protein with transcription factor activity. Note: this protein (AT3G29035) on occasion has also been referred to as AtNAC3, not to be confused with the AtNAC3 found at locus AT3G15500.	similar to ANAC092/ATNAC2/ATNAC6 (Arabidopsis NAC domain containing protein 92), protein heterodimerization/ protein homodimerization/ transcription factor [Arabidopsis thaliana] (TAIR:AT5G39610.1); similar to unnamed protein product [Vitis vinifera] (GB:	66.36	327	90	5	98	1018	1	308	4e-118	421
All.Contig_1319	GAAATCAGTAGAAGAAAAAAAAAGTTCTCAGATTTCCAAAAAGAAAAGCTTCGAAGAAGGAAAATGGCGGATCAGCTGACCGATGACCAGATCTCAGAGTTCAAGGAAGCCTTCAGCCTCTTCGACAAGGATGGCGATGGTTGCATCACCACCAAGGAGCTTSGGAACCGTGATGAGGTCTCTGGGGCAAAACCCGACAGAAGCTGAGCTCCAAGACATGATCAACGAAGTCGACGCTGACGGGAACGGGACCATCGACTTCCCTGAGTTCCTGAACCTGATGGCGAGGAAGATGAAGGACACTGACTCGGAGGAAGAGCTCAAGGAAGCCTTCAGGGTGTTTGATAAGGACCAGAACGGTTTCATCTCCGCGGCTGAGCTTCGACATGTGATGACTAA…	732	8	AT3G43810.1	CAM7 (CALMODULIN 7); calcium ion binding	EF hand domain protein encodes a calmodulin. Can functionally complement a yeast CaM mutant.	Identical to Calmodulin-7 (CAM7) [Arabidopsis Thaliana] (GB:P59220); similar to CAM3 (CALMODULIN 3), calcium ion binding [Arabidopsis thaliana] (TAIR:AT3G56800.1); similar to CAM5 (CALMODULIN 5), calcium ion binding [Arabidopsis thaliana] (TAIR:AT2G27030	96.64	119	4	0	155	511	31	149	3e-61	231
All.Contig_132	TAAAGGASACAACAAAACTCAAAACACACATATTATCTCCACTGAGTTCTCTCGTATAATAATCATCTCCTTCGAGAAATATGGCGATTTCAAAAGCCCTTATTGCTTCTCTTCTCATATCTCTTCTTGTTCTCCAACTCGTCCAGGCCGATGTGGAAAACTCAAACAAAAAGAGGGGTTACCGCAAAAAAATTGATTGTGGAAGTGCTTGTGTAGCAAGGTGCAGGCTCTCAAGTAGACCTAACCTTTGCCACAGAGCGTGCGGGACTTGTTGCGCAAGATGCAACTGTGTGCCACCTGGTACGTACGGAAACTACGACAAGTGCCAGTGCTATGCTACCCTCACCACCCACGGTGGTCGCCGCAAGTGCCCTTAAGTAAACTTAAAACTCTCAAATT…	696	73	AT1G75750.1	GASA1 (GAST1 PROTEIN HOMOLOG 1)	GA-responsive GAST1 protein homolog regulated by BR and GA antagonistically. Possibly involved in cell elongation based on expression data	Identical to Gibberellin-regulated protein 1 precursor (GASA1) [Arabidopsis Thaliana] (GB:P46689;GB:Q8W114;GB:Q9LR14); similar to unknown protein [Arabidopsis thaliana] (TAIR:AT2G18420.1); similar to snakin2 [Solanum tuberosum] (GB:CAC44012.1); contains I	92.86	98	7	0	81	374	1	98	4e-41	164
All.Contig_1320	GGTTTTTAGTCTCCTTGGTCCTCTCTAATCATCATCTCAAACTCCTGAAAAAAAAACTCTTCTTCTGCTCCGAGAATCTGTCAATCATGTCGAGATTTGCTCTCGCTATTATCTCTTGTCTTCTCTTCGTCTCGACGATTGTTAGAGCCACCGATGTCAGTTACTGCGATAACAACGAAGAGTATCAAGTAAAGGTCCATGGAGTTGATATATCGCCTGATCCTATAGTTACTGGCCAGCCAGCCACTTTCAGCATCTCTGCTAACACAGATARTGTGATCTCACGAGGAAAGCTGGTGATCGAAGTGTCATACTTTGGGTGGCATATTCATTCTGAGACGCATGATCTTTGTGATGAGACAAGTTGTCCAGTGGCAGTTGGAGATTTCTTAGTAGCGC…	687	4	AT3G11780.1	MD-2-related lipid recognition domain-containing protein / ML domain-containing protein		similar to MD-2-related lipid recognition domain-containing protein / ML domain-containing protein [Arabidopsis thaliana] (TAIR:AT5G06480.1); similar to hypothetical protein [Vitis vinifera] (GB:CAN73359.1); contains InterPro domain Immunoglobulin E-set (	78.71	155	33	1	78	542	1	153	5e-65	244
All.Contig_1321	GACAATCAAGCCCATCAAATCGSGGRGAGAAAAAAAAAGAAAGCAAGGAAGAAATAAATAAATAAACAAAAGAAAGCATCTGATAATGAAGGATCTTCATTTCCACATCTTCCTAGTCACCATGACGGTCATTGCATCCATCTCCGCGGCAACACCGACGGCTCCTGCGGCCGGAGGAGCATTGTCGGACGAATGTAACCAAGATTTTCAAAAGGTGACCTTGTGTTTGGACTTCGCGACCGGGAAGGCACCAACTCCGTCTAAGAAGTGTTGTGACGCTATTGAAGATATAAAAGAGAAAGATCCAAAGTGTTTGTGTTACGTGATACAACAAGCCAAGACAGGAGGACAAGCTTTGAAGGATCTTGGTGTTCAAGAAGCCAAACTTATTCAACTTCC…	697	6	AT1G27950.1	lipid transfer protein-related		Identical to Uncharacterized GPI-anchored protein At1g27950 precursor [Arabidopsis Thaliana] (GB:Q9C7F7;GB:Q570M7;GB:Q8LEI0); similar to protease inhibitor/seed storage/lipid transfer protein (LTP) family protein (YLS3) [Arabidopsis thaliana] (TAIR:AT2G44	80.75	187	36	2	86	646	1	184	2e-76	282
All.Contig_1322	GGAGTTTTGCAAAAAAAAAACCTCTCTCTAGTTTGCTCTAACCTCTCTCTAAACACAACTCCTTCAATCAAAGTTTCAAGCTTCGGTGGCCGGTGGCTTTGCCGCCGGTTACCATCTTTTATTTTTCTTTTTGGCTGTAAATATTTCGATCTTTGGATCAAACAAGTCTTCGCGTAGGCGACTCTACTTTCGCATGGCGATGTTTTGTTGTGTGTTTTCGAATAAGAGCTCCGATCATTAGATCGGATTCTGTCAAGCTTTACTCTCTTTTTTTTCAATCTTATTCCGGTTGTTTTCTAAAGTCTTCTTCTTTCCCGATGGACATCCTCAGTCTCTATTACCGAAAGATATCAATCTTTGTTTGTTAGAGTTACAACAAAGTATTCTATAGGGGTTGAG…	894	8	AT1G79970.1			similar to senescence-associated protein-related [Arabidopsis thaliana] (TAIR:AT2G25690.2); similar to senescence-associated protein-related [Arabidopsis thaliana] (TAIR:AT2G25690.1); similar to unnamed protein product [Vitis vinifera] (GB:CAO44134.1)	30.88	68	47	0	150	353	79	146	7.7	28.1
All.Contig_1323	CATCCACGAGAACGCTTACGGGTTGGCTAGGTACGCTGTTATCTGCCAGGAGAACGGTCTTGTACCCATCGTCGAGCCTGAGATTCTAGTCGACGGTTCCCATGACATCCACAAGTGCGCTGCCGTCACCGAGCGTGTCCTCGCGGCTTGCTACAAGGCTCTTAGCGACCACCATGTTTTGCTTGAGGGAACTTTGTTGAAGCCTAACATGGTTACACCTGGATCCGACAGTGCTAAGGTTGCGCCAGAGGTGATCGCTGAGCATACGGTTCGTGCTCTTCAGAGAACGGTCCCAGCGGCTGGTTCCAGCTATTGTGTTCTTGTCTGGAGGACAGAGCGAGGAGGAGGCGACCAAGAACTTGAACGCGATGAACCAGTTGAAGACCAAGAAGCCGTGGT…	892	9	AT3G52930.1	fructose-bisphosphate aldolase, putative		similar to fructose-bisphosphate aldolase, putative [Arabidopsis thaliana] (TAIR:AT2G36460.1); similar to unknown [Populus trichocarpa x Populus deltoides] (GB:ABK96406.1); contains InterPro domain Aldolase-type TIM barrel; (InterPro:IPR013785); contains	99	100	1	0	303	602	259	358	3e-104	201
All.Contig_1324	GGATGGGCGAGCTTCAGAGAGAGAGAAGCAGTGATTGTAAAGAGAGTTGTTGAGAGAGAAGCAGAGAGAGAGAGATGGCTAGTGGAATCGCTCGTGGTCGTTTGGCGGAGGAGAGGAAATCGTGGAGGAAGAATCATCCTCACGGTTTTGTGGCGAAGCCTGAGACTGGGCCTGATGGRTCTGTGAATCTAATGGTSTGGCATTGCACTATCCCTGGTAAAGCCGGTACTGATTGGGAAGGTGGATTCTTTCCATTAACGATGCACTTCAGCGAGGACTATCCGAGCAAGCCTCCCAAATGCAAATTCCCACCAGGCTTTTTCCACCCTAATGTYTATCCATCTGGAACCGTCTGTCTCTCAATCCTTAACGAAGATTCSGGGTGGAGACCAGCCATCA…	759	7	AT3G57870.1	AHUS5 (SUMO CONJUGATION ENZYME 1); ubiquitin-protein ligase	Encodes a ubiquitin-conjugating enzyme.	similar to ATUBC2 (UBIQUITING-CONJUGATING ENZYME 2), ubiquitin-protein ligase [Arabidopsis thaliana] (TAIR:AT2G02760.1); similar to Os03g0123100 [Oryza sativa (japonica cultivar-group)] (GB:NP_001048802.1); similar to hypothetical protein [Vitis vinifera]	95	160	8	0	75	554	1	160	4e-78	287
All.Contig_1325	CTATCAACTTTCGATGGTAGGATAGTGGCCTACCATGGTGGTAACGGGTGACGGAGAGAGGTTAGGGATCGCGAGAGGAAAATGGAGGTTCCAGGTTCATCGAAGAAGATGATCGCAACGCAGGAAGAGATGGTCGCAGCCAAAGTACCGCTCGGATACAGAGATCAGTGCGCTCATCTCCTGATGCCGCTCAACAAATGTCGCCAGGCTGAGTTCTTCCTCCCGTGGAAGTGCGAGGACGAGCGCCACGTGTACGAGAAGTGCGAGTACGAGCTCGTGATGGAGAGGATGCTCGCGATGCAGAAGATCCGCGAGGAAGAAGCCAAGGCTAAACAGAGTAAGCTACAAGGGAACGGTGTTCCGCTAATCCCTAAGACCGCTAATGCTTAGCCCCTCCTC…	719	5	AT2G02050.1	NADH-ubiquinone oxidoreductase B18 subunit, putative		similar to hypothetical protein [Vitis vinifera] (GB:CAN63291.1); contains InterPro domain NADH-ubiquinone oxidoreductase B18 subunit; (InterPro:IPR008698)	88.35	103	11	1	82	387	1	103	4e-47	184
All.Contig_1326	GACTCACTTAGTTTCTCTCTGCTAATCTCATCTTCAATCTCTCTCTATCGCACATCACCATGGCTGGCGGTAAGATCAAGATCGGAATCAACGGATTCGGAAGAACCGGTCGTTTGGTTGCTAGAGTCGTTCTCCAGAGGGACGATGTTGAGCTTGTCGCTGTTAACGATCCTTTCATCACCACTGAGTACATGACGTACATGTTCAAGTACGACAGTGTTCACGGTCAATGGAAGCACCATGAGCTCAAGGTTAAGGACGAGAAGACTCTTCTCTTCGGTGAGAAGCCTGTCACCGTCTTCGGCATCAGGAACCCTGAGGATATCCCATGGGGTGAGGCTGGAGCTGACTTCGTTGTTGAGTCCACCGGTGTTTTCACTGACAAGGACAAAGCTGCTG…	1253	3	AT1G13440.1	GAPC-2; glyceraldehyde-3-phosphate dehydrogenase		Identical to Glyceraldehyde-3-phosphate dehydrogenase, cytosolic (GAPC) [Arabidopsis Thaliana] (GB:P25858;GB:Q42352;GB:Q9M8W8); similar to GAPC (GLYCERALDEHYDE-3-PHOSPHATE DEHYDROGENASE C SUBUNIT), glyceraldehyde-3-phosphate dehydrogenase [Arabidopsis th	96.15	338	13	0	60	1073	1	338	9e-173	603
All.Contig_1327	GATGGAAACTTGATTTTTGCTAATCATCCTCGGGCAGTTAAAGAAAACCAGAGAAAAGAAACATGAGGATAATTGTCTCCATATTGTTTGTTGCCTCACTTCTTCTAATCACTTCATCCCTTGCTTCGGCTACTATCTCAGGTGGCGGTGGCGCCGCGGCTCCTGCGCCGGAAATCAAAGTGGGACCAGAATTAGATAAGTGGTGTGGAGGGAAGTGTGTAGTGAGATGCAAAGATGCAGGGATGAATGATAGATGTTTGAAGTATTGTGGAATATGTTGCAAAGAGTGCAAGTGTGTTCCTTCAGGAACTTATGGGAACAAGCATGAGTGTCCTTGCTACCGTGACAAGCTCAGCAGCAAAAAGACTCCCAAGTGTCCTTGATTCTCCCGTGACAAGT…	562	4	AT2G14900.1	gibberellin-regulated family protein		similar to gibberellin-regulated family protein [Arabidopsis thaliana] (TAIR:AT5G59845.1); similar to unknown [Populus trichocarpa] (GB:ABK94917.1); contains InterPro domain Gibberellin regulated protein (InterPro:IPR003854)	82.35	68	12	0	177	380	41	108	6e-33	137
All.Contig_1328	GACATTTGTAAGAGCAATTAGCTCCGWGACAGAGAAAAAACAAACAAACACAAAAAAAAAACATGGCAGCTCAAGCCTCGGGTCTCTTTAGCTCCGCCGTAACAACCGCCGCTACCTCCGGCGTAAAAAAGCTCCACCTTTTCACRACATCCCACCGTCCAAGATCCCTCTCCTTCCCCAAAACCGCAATCCGCGCCGAGAAARCAGACTCCGCCGCCGCCGCCCCCGCCGCCGCCGTGAAAGAAGAAGCTCCGGTGGGATTCACGCCGCCGCAGCTAGACCCGAACACGCCGTCTCCGATCTTCGCGGGAAGCACGGGCGGTCTTCTCCGCAAGGCCCAGGTGGAGGAGTTCTACGTCATCACGTGGAACTCGCCGAAGGAGCAGATCTTTGAGATGC…	860	18	AT4G02770.1	PSAD-1 (photosystem I subunit D-1)	Encodes a protein predicted by sequence similarity with spinach PsaD to be photosystem I reaction center subunit II (PsaD1)	Identical to Photosystem I reaction center subunit II-1, chloroplast precursor (psaD1) [Arabidopsis Thaliana] (GB:Q9S7H1;GB:Q8L9B6); similar to PSAD-2 (photosystem I subunit D-2) [Arabidopsis thaliana] (TAIR:AT1G03130.1); similar to PSI reaction center s	90.38	208	20	0	63	686	1	208	3e-100	361
All.Contig_1329	GAATTAATATCGGAATATGAGCGATCCAATGGGGGAAACTGGATTTTCTGGAGAATCGGCGGAGATGGTCTTCTCCGAGACGGAGATGGCGGCGGCAGAACTGCTTATGCAGCTGAGCGAGGAAGAAACGGTGAGCTGTAGCAGCAGCAACGTCGGAGAAAGTGGAGGAGGTGGCAAGAGAAGACACGAAGATGTTTGCTCGAGAATCAGAAACGACGGCGTAAAAGGCAATTGTAATCTCGGCCGGAAGATGAAGAAGATGAAGGAAAAAAAGTTTCGATCTCTCGAGAGTATTTACATGGCAACGAAGGAGATTAGGGCTTAATTAATGGAAGAAAGGGGATGGAATAATTACATGTTAATCGTTTTTAATAACCTGTGTCAATGGTTTTTGTGTGT…	548	4	AT2G21780.1	unknown protein			65.77	111	28	4	17	319	1	111	1e-18	89.4
All.Contig_133	GTCTCCTCTCAAWCSGSGGCTACTCTCTCTTTCTCTCTCTCTTGCGATTCGTTACGCTGCTTTTGAATCGAGATGGATGAAGATTTCGAGATGCCTCCCGTCGGTGGAATCAACGGCGACGACGAGATGGACTTCGGCGACGACGCCTCCTTCCTCAAAGTCGGCGAGGAGAAGGAGATCCAGCAAGGCTTGAAGAAGAAGCTCCTCAAGGAAGGCGAAGGATTCGAGACTCCTGAGAACGGCGATGAAGTCGAAGTGCACTACACTGGTACTTTGCTCGATGGGACCGAGTTCGATTCCAGCCTTGACAGAGGAACGCCTTTCAAATTCACTCTCGGTCAAGGTCAGGTTATTAAAGGATGGGATATTGGTATTAAGACTATGAAGAAGGGTGAAAAC…	773	3	AT3G25230.2	ROF1 (ROTAMASE FKBP 1)	Encodes a a high molecular weight member of the FK506 binding protein (FKBP) family. It has three FKBP12-like domains, tetratricopeptide repeats, and a putative calmodulin binding domain.	Identical to 70 kDa peptidyl-prolyl isomerase (ROF1) [Arabidopsis Thaliana] (GB:Q38931;GB:Q38949;GB:Q9LSF3); similar to peptidyl-prolyl cis-trans isomerase, putative / FK506-binding protein, putative [Arabidopsis thaliana] (TAIR:AT5G48570.1); similar to	90.95	232	21	0	73	768	1	232	1e-108	389
All.Contig_1330	AAAGAAGAATTAAAAGAAGGAAAAGAAAAACATTTTCATCTCTCTCTTCTTGAAAGCAATGGATCGGCAAAACTCCGATGACATCATGAAGTTTCTCGACGGAATGGCTAGCTCCGACGATGTTTTATTTGGCTTTCTCGACGAAGGAAACCACTCACCAGAGGATTACCCTGATTCCGGTAGCTTCGCCGGCGGCGAAGAATCCGATATGGACAACGATGCCGCCGGTTGCAATTCCGAAGAGAGCAAAACGTTTTGGAATGAACAAGAACAACTTCTCCAGGCGACACTGTATAGGACAAGTTCAGTTGAGACAAAGATTCGACAAGCAACCAAAGAAGCGTTGAAAGAAGTGAGATCAAAGGGTTTGCAATGTGTTTGCCGGAGACCAGCGACCGG…	602	6	AT4G32480.1			similar to unknown protein [Arabidopsis thaliana] (TAIR:AT2G20670.1); similar to unnamed protein product [Vitis vinifera] (GB:CAO69754.1); contains InterPro domain Protein of unknown function DUF506, plant (InterPro:IPR006502)	82.87	181	31	1	59	601	1	177	8e-84	306
All.Contig_1331	GTCGACGATCGATTCGAGTTTCGTGGAGGCATGGAAGAAAGTCGCACCGAACATGGACCCGCCGCAGACTCCTTCTTCCTTCATGAAGCCTCGTCCATCGACTGCTTCCTCGWTTCCGACGAAGCTCACCGTCAATTTCGTCCTCCCTTACGCATCTGAGCTTTCCGGGAAAGAGGTCGACATGGTCATCATTCCCGCAACAACAGGACAAATGGGWGTTTTGCCTGGACACGTYCCAACAATCGCTGAGCTCAAACCCGGTATCATGTCCGTTCACGAAGGAACTGACATAAAKAAATACTTTGTGAGCAGTGGCTTCGCATTTCTTCACGCAAATTCCGTCGCTGACATTATCGCGGTTGAGGCCGTGCCGCTCGAGAACATYGACGCGAGCCAAGT…	670	4	AT5G47030.1	ATP synthase delta' chain, mitochondrial		Identical to ATP synthase subunit delta', mitochondrial precursor [Arabidopsis Thaliana] (GB:Q96252); similar to hydrogen-transporting ATP synthase [Brassica rapa] (GB:ABL97963.1); contains InterPro domain ATPase, F1 complex, delta/epsilon subunit; (Inter	90.7	172	16	0	2	517	32	203	1e-85	312
All.Contig_1332	GATTTAAAAGATGATACTCTTTCTCTCTCTTATCTCTCTCGAATCTTTCAGAGAGAGAGAGAGTTTCATCTTTCTCACCGTGAAGAATCAACGGGATGGTGATGTGTTTCTTCACCGATTCGCCGGATTCTCATYGGCATCGACTCCCGGCGTTCGGGCTTTGACTCTGGCAAGCGACAGTTTCGTTAAACGTCGTCTTGGCCGGCYTTTCTTCCGGCAAGCGGCGGCTTCCACAGCGTTGATCTTGGCCGGCTTTCTCTCCGGCATACGATGGCTWCTTCAGCGCCGTATTGGCCGGCTTACCTTCATCCTATCATCGTTTCATCTCCGATGTTGGGTCGTTTTTTTTACACCGGATTTGTCCGTGTTGTTTGTTTAGTTTTTCAGTTTTCTTTGAGC…	746	4	AT1G47380.1	protein phosphatase 2C-related / PP2C-related		similar to protein phosphatase 2C-related / PP2C-related [Arabidopsis thaliana] (TAIR:AT1G68410.2); similar to protein phosphatase 2C-related / PP2C-related [Arabidopsis thaliana] (TAIR:AT1G68410.1); similar to hypothetical protein [Vitis vinifera] (GB:CA	41.46	41	24	1	454	576	201	238	2	29.6
All.Contig_1333	TGGAAAGGTGAAGCTTTCTGGATCAATCAGTAGTCAATACTTGACTGCACTGCTCATGGCAGCTCCCTTAGCTCTTGGAGACGTTGAGATTGAGATCATTGATAAATTGATTTCTGTTCCATATGTTGAAATGACATTGAAGTTGATGGAACGTTTTGGTGTTAGTGCCGAGCATAGTGACAGTTGGGATCGTTTCTTTGTCAAGGGCGGTCAGAAATACAAGTCGCCTGGTAATGCTTACGTAGAAGGTGATGCTTCTAGTGCTAGTTATTTCTTGGCTGGTGCTGCCATTACTGGTGAAACCGTTACTGTTGAAGGTTGTGGAACAACCAGCCTGCAGGGAGATGTGAAGTTCGCTGAGGTTCTTGAGAAAATGGGATGTAAAGTGTCATGGACAGA…	1020	7	AT1G48860.1	3-phosphoshikimate 1-carboxyvinyltransferase, putative / 5-enolpyruvylshikimate-3-phosphate, putative / EPSP synthase, putative		similar to 3-phosphoshikimate 1-carboxyvinyltransferase / 5-enolpyruvylshikimate-3-phosphate / EPSP synthase [Arabidopsis thaliana] (TAIR:AT2G45300.1); similar to 3-phosphoshikimate 1-carboxyvinyltransferase, chloroplast precursor (5-enolpyruvylshikimate-	97.1	276	8	0	2	829	246	521	4e-137	484
All.Contig_1334	ACCTCTTAACTTTTTTGTCTTGTTTCTTTTTACCACCGGACTTTTGCTTTTCCAGGTGCCAAAACGCATCTCCTCCTCCTCCGTCTCCTACTCCTCGCTTCCTCGTCACGCAACCTTTGATCCACCGGAGCAATGAAGATCACCGCCTTGCTTGTTCTCAAGGCCGCCCCCGAAACTTCGGATCCAGTCATCCTCGCAAACGCTTCGGACGTCTCTCACTTTGGCTATTTCCAGCGATCTAGCGTCAAGGAGTTCGTCGTTTTCGTCGGCCGCACCGTCGCTAGCCGAACCCCTCCTTCTCAGCGCCAGTCCGTCCAGCACGAAGAGTACAAGGTTCACGCTTACAATAGGAATGGTCTTTGCGCGGTGGGATTCATGGACGATCATTATCCTGTTCGA…	761	4	AT5G58060.1	YKT61 (similar to yeast SNARE YKT6 1)	member of YKT6 Gene Family	Identical to VAMP-like protein YKT61 (YKT61) [Arabidopsis Thaliana] (GB:Q9ZRD6); similar to ATYKT62 [Arabidopsis thaliana] (TAIR:AT5G58180.1); similar to unknown [Populus trichocarpa] (GB:ABK93525.1); contains InterPro domain Longin-like; (InterPro:IPR01	95.48	199	9	0	133	729	1	199	1e-106	382
All.Contig_1335	GACATTSATAACTTCATATGTTCCTGATCATTCCCGAAGCTAATTCCTCTCCTCCTTGGCTTGGCTCTTCGAGAAAGATCGTGGAAGTCTTCGTCTGAGGGACAAGAATCCTAGGCTGTGCCCGAAGCTTCAAGCTATGGCTGTCACCAAGATTTATATAGTGTACTACTCGTTGCACGGCCACGTGGAGACAATGGCAAGAGAGGTACTCAGAGGAGCGAACGAAGTTCCAGACGTGGAGGCAACTCTCTGGCAAATACCAGAGACGTTACCTGAGAAGATACTTGAGAAAGTGAAGGCTGCTCCAAGACCGGACGATGTGCCGGAGATTCAAGGGGAGCAGCTAGGTGAAGCTGATGGGTTCATGTTCGGTTTCCCTTCCAGGTTTGGAGTGATGGC…	981	4	AT5G58800.2	quinone reductase family protein		similar to quinone reductase family protein [Arabidopsis thaliana] (TAIR:AT4G27270.1); similar to unnamed protein product [Vitis vinifera] (GB:CAO21486.1); contains InterPro domain Flavodoxin/nitric oxide synthase; (InterPro:IPR008254)	93.72	207	13	0	137	757	1	207	3e-113	405
All.Contig_1336	GATSGATCACTCTCTACAACATTTGTGGAATAATTAACTAWTTAACTYTACGATCTTGAAACTATTAGRGTTGATRCCATGGGSTTACTAGATCATCTTTGGGATGATACCGTCGCTGGTCCTCTGCCAGAGAACGGCCTTGGCAAGCTTCRGAAACACCATACTTTCAGTTTCCGGCCAAGCTCCGCCAATGATCAATCGGAGGTGAGGTCGTACGGCGGAGATTCACCGGAAGAGGCAGTGAAAGTAACACGAAGCATCATGATAATAAAACCACCAGGTTACCAAAGCGGTTCCGCTCCGGTGTCGCCGGCCGGTTCAACTACACCGGTATCCCCCAGTCCTTTCTCTGGAGGAAAGGAACCCTTTCGGTTTAGGAGAAGGTCGGCATCGGACGCG…	776	8	AT1G56220.1	dormancy/auxin associated family protein		similar to dormancy/auxin associated protein-related [Arabidopsis thaliana] (TAIR:AT1G54070.1); similar to unnamed protein product [Vitis vinifera] (GB:CAO17488.1); contains InterPro domain Dormancyauxin associated (InterPro:IPR008406)	81.75	137	15	4	79	459	1	137	6e-48	187
All.Contig_1337	GCTCGCAAAAATCAATCGGAACGAGGAGAATGAGCGGAGTTTCAACGGCGGCGTATTTCGCGCGGCGGGCGGCGCAGAAGGAGAGGGTTCGAATCCTCTATCGACGTGCCCTTAAGGATACTCTCAATTGGGCTGTTCATCGTCACATTTTCTACCGAGACGCGTCTGATCTGCGCGAGAAGTTCAACGCCAACCAAGATGTGGAGGATGTTGACAGAATCGACAAACTGATTGCTCATGGTGAAGCAGAATACAACAAGTGGCGGCACCCTGATCCTTACATCGTTCCATGGGCTCCTGGTGGCTCTAAGTTCTGTAGAAACCCCACTCCACCTGCTGGGATTGAGATCGTGTACAACTATGGTCAAGAAGACAACCCATGAACCTAACTTTCTTGTT…	660	4	AT4G34700.1	complex 1 family protein / LVR family protein		similar to Os06g0714100 [Oryza sativa (japonica cultivar-group)] (GB:NP_001058571.1); similar to hypothetical protein CX157 [Homo sapiens] (GB:AAK67625.1); contains InterPro domain Complex 1 LYR protein (InterPro:IPR008011)	98.29	117	2	0	30	380	1	117	9e-66	246
All.Contig_1338	TGATCTCTCTTTGCTCKGCTGCTACATTTCGGAAACTTCTAGCTAAGGCTTCTTCTTTCCAAAGCAAGACCACGATTTTTCTTCATGGCTACCGGAGAGGAGAAACCTGTTATGGTCGTCGGTATGGACGAAAGCGAGCAGAGCACTTACGCCTTGGAGTGGACCCTCGATCGTTTCTTCGCTCCTTATGCTCCTAATTTTCCTTTCAAGCTCTTCATCGTCCACGCCAAACCTAACGCCGTCTCTGCCGTTGGTCTTGCTGGTCCCGGAGCTGCGGAGGTTCTGCCGTATGTTGATACCGATTTGAAGCATATTGCTGCCAGGGTTATCGAGATGGCTAARGGTATCTGTCAGAGCAAATCGGTTGATGGCGCTATGTTCGAAGTTTTTGAAGGTGAT…	741	4	AT2G47710.1	universal stress protein (USP) family protein		similar to unknown protein [Arabidopsis thaliana] (TAIR:AT5G49050.1); similar to universal stress protein family protein [Brassica rapa] (GB:ABV89633.1); contains InterPro domain UspA; (InterPro:IPR006016); contains InterPro domain Universal stress protei	85.81	155	22	0	85	549	1	155	1e-75	279
All.Contig_1339	GAAGTTCGATTCAAAAAGCCAACACAAGSAAAGAAATCAAAAGGTTGTCTTGTTGCTATAGAAACACAAACACAGAAACCAAAACCTCAGACTGAAGAGAGTTTGTACTTGTGTTAGAAAAGAAAATGGCTAGCTTCACTGCCTCTGCTTCCACCGTCTCTGTCGCTCGTCCTGCTCTCCTTCTCAAGCCCACCCTCGCCATCTCCGCTCCTGTTCTTGGTTTGCCTCCAATGGGGAAGAGGAAGGGAGGGGTGAGATGCTCAATGGAGCCAAAGCAAGGAAACGTCTCAGCCGTGGGRGCTGGAGTTTCCGCGGCGGCRACAGCAGCTTTRACGGCTGTGATGAGCAACCCGGCCATGGCGTTGGTGGATGACAGGATGTCCACGGAAGGAACCGGAC…	706	7	AT2G30570.1	PSBW (PHOTOSYSTEM II REACTION CENTER W)	Encodes a protein similar to photosystem II reaction center subunit W.	Identical to Photosystem II reaction center W protein, chloroplast precursor (PSBW) [Arabidopsis Thaliana] (GB:Q39194;GB:O04338); similar to component of 6.1 kDa polypeptide of photosystem II reaction center [Brassica rapa] (GB:ABL97943.1); contains Inte	91.51	106	9	0	168	485	15	120	1e-40	162
All.Contig_134	GATAGAATCATTTTCTTCTCTCTCTCTATCAAACCAGAAGAAGAAGAAAAGAGAATCGGACATGGCTTCGCCGAGCAAACGCCGAGAGATGGACATGATGAAATTGATGATGAGTGATTACAAAGTGGATACTGTCAACGACGATTTGCATATGTTCTATGTCACTTTCCATGGCCCCACTGACAGTCTTTACGAAGGAGGTGTTTGGAAGATCAAAGTCGAACTCCCTGACGCTTATCCTTACAAATCTCCTTCTGTTGGTTTCGTTAACAAGATTTATCACCCCAATGTTGATGAATCTTCTGGCGCAGTTTGCTTAGATGTAATAAACCAGACATGGAGTCCAATGTTTGATCTTATCAATGTCTTCGAGTCATTCCTTCCTCAACTGCTTCTGTA…	765	3	AT2G46030.1	UBC6 (UBIQUITIN-CONJUGATING ENZYME 6); ubiquitin-protein ligase	Ubiquitin conjugating enzyme E2	Identical to Ubiquitin-conjugating enzyme E2-21 kDa 3 (UBC6) [Arabidopsis Thaliana] (GB:P42750;GB:O49739;GB:O82365); similar to UBC4 (UBIQUITIN CONJUGATING ENZYME 4), ubiquitin-protein ligase [Arabidopsis thaliana] (TAIR:AT5G41340.1); similar to ubiquiti	85.56	187	27	1	62	622	1	183	3e-85	311
All.Contig_1340	GACSACCACCGTCTTTCTAAACAAATTACACATGGCGAGTCTCTGCATCTCATCGTCCAGGATCGTCTCCCTCCACCACCAGAAACCGTTTCTCTCTCTTAAACTCCGGCCTTGTTCGTCAGGTTTCTCCGTTCCAACTCACCGCACGACTGCCGTTTGCTTCAATCCGCTAAGAGTACCGTTAGACCGCCAGCGAACCGCCGCTGCTGTGTCTAGGAAAGCTGAGAAGCAGCKAAAGAGAGGATCGAGTGTGGTCTGTTATGCTGCTCCGATGTCTCTTCATAATCTACAATGGGTCTCAGCAATCTCTTGCGTTGCATTGATGGTTGCAAGGGGTACAGGTATCCACAAGTCCTTTGTTGTTCCGCTACTTGCTCTAACTGCACCATCAGGCATTAT…	775	5	AT1G29390.1	COR314-TM2 (cold regulated 314 thylakoid membrane 2)	encodes a protein similar to the cold acclimation protein WCOR413 in wheat. Possibly targeted to thylakoid membrane.	similar to COR414-TM1 (cold regulated 414 thylakoid membrane 1) [Arabidopsis thaliana] (TAIR:AT1G29395.1); similar to unnamed protein product [Vitis vinifera] (GB:CAO66899.1); contains InterPro domain Cold acclimation WCOR413 (InterPro:IPR008892)	79.2	226	46	2	32	706	1	225	2e-88	322
All.Contig_1341	GGAAGAGRAGAGAAGRGAAGAGAAGAGAGAAACAAAACACTTAAAAGAACTCAAAAGCTAGAAGAACTCAAAAGATGTATAATCAAGAACATCCTGTCGGTGCTCCTCCTCCCCAAGGGTATCCTCCTAAGGACGGTTATCCTCCGGCTGGCTATCCTCCCGCCGGTTATCCACCGCCAGGATATGCTCAGGGATACCCTGCTCAAGGTTATCCTCCACCGCAGTACTCTCAAGCTCCCCAGCAAAAGCAACAAGCTGGTATGCTCGAAGGATGTTTGGCTGCGCTCTGCTGTTGCTGTCTCCTGGATGCTTGTTTCTGATCGGAGAATTTATTCAGTTCAACGATTTMTTYTTCTATTACATGCAATGAAAAAGACAGACTTGTGTKCCGTTGTTTAT…	483	6	AT3G57160.1	unknown protein			43.24	74	42	1	106	327	20	91	3e-06	47.8
All.Contig_1342	GACACATCAAAGCATCACACACACACACAAACACACACTTTCTCTTCTCTTCTTTTGATCTTTTCCTCTTTTCTACACATTCAAATGGCCACTGCTGATGTTGAACAAGTGACTCCAGCCGCAGCTGAGCACGTCGAGATGACACCACCAAAGACAGTGGAGCCTGAGGAAACCGCCGCCGCCGTTGTGACCGAGTCTGCTCCAGCTCAGGTAACAGAAACTGAAGCTCCCGTGGAAGAAACAGAGAAACCAACCGAAGAAGCAGATGAAACCAAAACCGAGACGAAAGAGGAAGAAGCTCCAGTCGAAGTAACCACAAAAGACCTCCCCGTCGAAGAAACAGAGAAACCAGCTGAAGAAACAGAGGAGGCCAAAACAGAAACTGAAGAGATCAAGAAA…	743	7	no significant hit
All.Contig_1343	GACKAATGGAGATTTGCGTATTTATCTCTCTCTCTAGTTTTTTTTCTCTCCCACTTCTCTCTAAAAAACTCTCGACACAGGAACTCGTTTCGGTGGCCGGTGGCCTACCGCTGCCGGTTACCATTCCCTTTTTGTCTTTTGTTTTTTTTTTGTATCATATTTCTATTCCGTTAACCGGATAAAAGTTTCGCTAGGCGATTTGCTCTTCGGTCAATAGATCGATCAATACTTCCGCGTAGTCGGATCTATCATCGCGAGGCGATTTTGTTGTGTTAATAAATCCCGATCATCTCTGATCGGATCTTGTAAAATCTAAAACTCTCCTCTTCTGCAAAAAATAAATGTTTTATTCCATTTGCTTGGGATGGATTCTCAATCTATTCAAAGATAAGCACTTAA…	956	8	AT4G17215.1			similar to unknown protein [Arabidopsis thaliana] (TAIR:AT5G47635.1); similar to hypothetical protein 40.t00006 [Brassica oleracea] (GB:ABD65131.1)	47.83	23	12	0	757	825	113	135	8.5	28.1
All.Contig_1344	AAGCAGTGGTATCAACGCAGAGTGGCCATTACGGCCGGGGATCAGKATCTCTCTCTCAAAGCCAAATAAACATTTTAGATTTTTTCTTCAGTTTCTTAGAGAAGATGTCTTGCTGTGGAGGAAACTGTAGCTGCGGATCTGACTGCAAGTGTGATGGCTGCAAAGGTYGCAAGATGTACCCAGACTTGGGCTTCTCAGGGGAGACTACCACCACCCAGACTCTTGTCCTCGGCGTTGCTCCGTCGATGAACTCTCAGTATGAGGCTTCTGGCGAGACTTTCTTCGCCGAGAATGATGGATGCAAGTGCGGATCTGACTGCAAGTGCGACAACCCTTGCACTTGTAAATGAACAACCCCAATAAACCCAAACCCCAAGTATTTAAAGTAAAACCTGATGT…	659	2	AT3G09390.1	MT2A (METALLOTHIONEIN 2A)	metallothionein, binds to and detoxifies excess copper and other metals, limiting oxidative damage	Identical to Metallothionein-like protein 2A (MT2A) [Arabidopsis Thaliana] (GB:P25860;GB:P43391); similar to MT2B (METALLOTHIONEIN 2B) [Arabidopsis thaliana] (TAIR:AT5G02380.1); similar to metallothionein-like protein [Brassica rapa] (GB:BAA11391.1); sim	63.79	58	21	1	174	347	25	81	1e-13	73.2
All.Contig_1345	GACTCTGACATCAAAACAATCAAACAACTAGCTACTTCAACCAAATACTTTCAAAGAAGAGAGAGAGAGATGGAGAAGAACATTAAGTTTCCAGTTGTAGACTTGTCCAAGCTCATTGGTGAAGAGAGAGACCAAACCATGGCTTTGATCAACGATGCTTGTGAGAATTGGGGCTTCTTTGAGATAGTGAACCATGGTTTACCACATGATTTGATGGACAACGTCGAGAAGATGACAAAGGAACATTACAAGATATCAATGGAACAAAAGTTCAACGACATGCTCAAATCCAAAGGTTTGGAAAATCTTGAGCGAGAAGTTGAGGATGTTGATTGGGAAAGCACTTTCTACCTTCGTCATCTCCCTCAGTCCAATCTCTACGACATTCCTGATATGTCT…	1247	4	AT1G62380.1	ACO2 (ACC OXIDASE 2)	Encodes a protein similar to 1-aminocyclopropane-1-carboxylic oxidase (ACC oxidase). Expression of the AtACO2 transcripts is affected by ethylene.	similar to 1-aminocyclopropane-1-carboxylate oxidase, putative / ACC oxidase, putative [Arabidopsis thaliana] (TAIR:AT1G12010.1); similar to ACC oxidase [Brassica oleracea] (GB:CAA57284.1); contains InterPro domain 2OG-Fe(II) oxygenase (InterPro:IPR005123	91.25	320	28	0	70	1029	1	320	9e-160	560
All.Contig_1346	GACATTGTCTTTGTCTGCACATTACAAAAAGGTTACTAGAGATTTTCTTTAGCAAGACATCAAGAAGTAAATTATAATCAGAGAATCTTCAAATCGTCATGATAACAGTAGCTATTGCCGCTGAGTTGCTTGAAGAATACACGTTGGCGCTAGCTCGCATCACCGCCACACTCCTCCCTCCACCACCAACAAGTCGCCGTCGAAGGGTGCGGGCTCCCACTAGCCGTGGCCAAGCTGATTCTTCCTTGCCTCGTAACGACGTCTCATCATCTTGCGCTCCAAACTACGCCGCGTTTCTCTTGAATTTCTGAGTACTTCTTACTTTGTATAGACGAAGAGATTTTCGGATTTTCTTCTTCTTGATTGTAATTTCGAAACATGCATGCTTGTGTTATGCAA…	464	4	AT5G24570.1	unknown protein			85.71	28	3	1	228	308	43	70	2e-06	48.1
All.Contig_1347	TGGCACTCTTCACAACGTTCATTACGACGCCGACTGTAATGGCCATTTACAAGCCGGCACGTGGTACACACCGCAAACTAAAGGACTTGTCGGCGAGCGAAGACTCCACCAAGGAAGAGCTTCGTATCCTCGCCTGCCTCCATGGTCCAGCCAATGTCTCATCTCTTATCTCTGTCATCGAGTCCATCCGAACCACCAAGATGCTGCAGCTAAAACTATTCGTCATGCACCTCATGGAGCTAACAGAACGATCCTCGTCAATCATAATGGTGCAAAAAGCCCGTAAAAACGGGTTCCCTTTCGTCCAGCGTTACCGTCACGGGGAGTGTCACAGTAGCGTCATAGGAGGCTTCCAAGCCTACCGTCAACTGGGCCGAGTCGCGGTCCGGCCTATTACCG…	1513	15	AT3G53720.1	ATCHX20 (CATION/H+ EXCHANGER 20); monovalent cation:proton antiporter	member of Putative Na+/H+ antiporter family. Involved in the osmoregulation through K(+) fluxes and possibly pH modulation of an active endomembrane system in guard cells.	similar to ATCHX18 (cation/hydrogen exchanger 18), monovalent cation:proton antiporter [Arabidopsis thaliana] (TAIR:AT5G41610.1); similar to ATCHX19 (CATION/H+ EXCHANGER 19), monovalent cation:proton antiporter [Arabidopsis thaliana] (TAIR:AT3G17630.1); s	90.35	425	41	1	3	1277	419	842	0	737
All.Contig_1348	GATATTTTTCGCATATAAAGAACAGGCAAGCCCGAGCCAGAGSAGAASACAGCACACTTGGAGTTAAAGAAAAAGAGTTCTTCTTTTCGTGTGTCAATTTTCTCTTCTTCCTTTCTCGTGCTTTCCTCACGAGATCTCTCACAAGACTCTCACGTTAAAATAATAGAAAAGAAAAAGGTAAAAAAAGAAGGAATCCATAAATGGACATGAGAAGCAACAACCACCAGCAACAACAGCAACAGGTACTTGATGGGTCGGACATAGTCGAGCTGGTCGAAAACGAAAAAGTCTTCGACAAGTTTGTGGAACAAAAGTTTCAACAGTTGGATCAAGACGAAGATGGTAAGCTCTCCGTGAAAGAGCTACAGCCTGCCGTTGCTGATATCGGCGCCGCTCTTG…	787	4	AT4G38810.2	calcium-binding EF hand family protein		similar to calcium-binding EF hand family protein [Arabidopsis thaliana] (TAIR:AT5G28830.1); similar to unnamed protein product [Vitis vinifera] (GB:CAO47301.1); contains InterPro domain Calcium-binding EF-hand; (InterPro:IPR002048)	89.74	195	20	2	201	785	1	193	9e-92	333
All.Contig_1349	GAATTCTAACCGAAACAATCSAACATATATTCGGCTAATAGGCTTTCCGCATAAAGCTGGGGGAAAGGGAAGAGAAAAGARAAGACGCACGCACACCGTAGWCTCCATCGTCTCTCCAGCTTCTTCTTCTTCGTCTCTGAAACTAATCTGATTCAKCCATGGCTAATGCAGCGTCAGGCATGGCAGTCCACGATGACTGCAAGCTCAAGTTTCTTGAACTTAAGGCGAAGAGGACATACCGTTTCATCGTTTACAAGATCGAGGAGCAGCAGAAGCAAGTGGTTGTTGAGAAACTAGGCGAGCCTGGTCAATCCCATGATGACTTTGCAGCAAGTCTTCCAGCTGATGAGTGCCGCTACGCCATCTTCGATTTTGATTTCGTCACTGCTGAGAACTGTC…	873	4	AT3G46010.2	ADF1 (ACTIN DEPOLYMERIZING FACTOR 1)	Actin-depolymerizing factor (ADF) and cofilin define a family of actin-binding proteins essential for the rapid turnover of filamentous actin in vivo.	Identical to Actin-depolymerizing factor 1 (ADF1) [Arabidopsis Thaliana] (GB:Q39250); similar to ADF4 (ACTIN DEPOLYMERIZING FACTOR 4), actin binding [Arabidopsis thaliana] (TAIR:AT5G59890.1); similar to Actin-depolymerizing factor 1 (ADF-1) (GB:Q9FVI2);	86.92	130	17	0	186	575	21	150	8e-63	237
All.Contig_135	GAAACCAAACCAAAACACATAAAGCTCATCGAGAGAAGATTCAGACATTTCATAGCTTCTTTGTTGGGGGTACCCTGAGATCACAAAGGATAATAAACAATGGGCAAGGGAGTGGCAGTCTTGAACAGCGGTGAGGGTGTTAAGGGGACTATCTTTTTCACCCAGGAAGGAGACGGTGTGACCACTGTGACTGGAACAGTTTCTGGACTTAAACCTGGTCTACATGGTTTCCATGTCCATGCTCTTGGTGATACCACTAACGGTTGCATGTCCACCGGTCCACATTTCAACCCTGATGGTAAACAACACGGTGCCCCAGAGGATGCTAATCGTCATGCTGGAGATCTAGGAAACATCATTGTTGGAGATGATGGAACTGCCACCTTCACAATCACTGAC…	753	4	AT1G08830.2	CSD1 (COPPER/ZINC SUPEROXIDE DISMUTASE 1)	Encodes a cytosolic copper/zinc superoxide dismutase CSD1 that can detoxify superoxide radicals. Its expression is affected by miR398-directed mRNA cleavage.	Identical to Superoxide dismutase [Cu-Zn] (SODCC) [Arabidopsis Thaliana] (GB:P24704;GB:Q9FRQ6); similar to CSD2 (COPPER/ZINC SUPEROXIDE DISMUTASE 2), copper, zinc superoxide dismutase [Arabidopsis thaliana] (TAIR:AT2G28190.1); similar to Cu-Zn superoxide	95.39	152	7	0	100	555	1	152	1e-74	276
All.Contig_1350	GACATKATTACTACCCAATTTTCTAGAGAGAGAGAGAGAGAGAACAAGAAGCTCAGATATGGAAGGCAAAGAAGAAGATGTTAGAGTCGGAGCCAACAAGTTTCCTGAGAGACAGCCGATCGGAACATCGGCTCAGAGCGACAAGGACTACAAGGAGCCACCTCCCGCTCCCTTGTTGGAGCCCGGCGAGCTTGCTTCGTGGTCCTTCTGGAGAGCAGGGATCGCCGAGTTCATCGCCACGTTTCTGTTCCTTTACATCACTGTTTTGACCGTCATGGGTGTGAAGAGGTCGCCGAACATGTGTGCTTCTGTCGGAATCCAAGGCATCGCTTGGGCTTTCGGTGGTATGATCTTCGCTCTCGTCTACTGCACCGCTGGTATCTCCGGTGGACAYATYAA…	1173	8	AT2G45960.1	PIP1B (plasma membrane intrinsic protein 1;2); water channel	a member of the plasma membrane intrinsic protein subfamily PIP1. localizes to the plasma membrane and exhibits water transport activity in Xenopus oocyte. expressed ubiquitously and protein level decreases slightly during leaf development.	Identical to Aquaporin PIP1-2 (PIP1-2) [Arabidopsis Thaliana] (GB:Q06611;GB:Q8L5V4); similar to PIP1A (PLASMA MEMBRANE INTRINSIC PROTEIN 1A) [Arabidopsis thaliana] (TAIR:AT3G61430.2); similar to PIP1A (PLASMA MEMBRANE INTRINSIC PROTEIN 1A), water channel	98.95	286	3	0	59	916	1	286	1e-154	543
All.Contig_1351	GGACTTGACTTAARAGAGAATCCCATCATCATAAAATCSAAATCCCTTCGCTGCGTTTCTTCTGCATTGACCGGATCGCTTCGTTCTTACGCGGATTCATCCTCAATTCACCATGACTCGTGGAAGTCAGAGAGAGCGTGACCGTGAAAGAGCCGCGGCTCGTGCTGGAGGAAAAGGAAAGAATGCTGACGACGGATTGACGCCGGAGCAACGCCGYGAAAGAGATGGAAAAGCATTGCAAGAGAAAGCAGCAAAGAAGGCTGCTCAAGCTGCAGCTGCTGCAGGTTCYGGTGGAGGAGCAGGAGGCAAAGGAACTGCTAAGAAGTGAWATCATTTGGTCTGTCTCTTGGGCGGCGYAATAATGTAGACTTTTACGKTTTTTTTTTATTATRAACATCT…	631	5	AT4G13615.1	four F5 protein-related / 4F5 protein-related		contains InterPro domain Four F5 protein (InterPro:IPR007513)	97.37	38	1	0	113	226	1	38	5.8	27.7
All.Contig_1352	GAGAAGGTTCGAGTGCCGTCTCGAACATTCTCTCTTGACTATAAAGAAAAAGGAAGTAGGGAGAGAGCTGCAAGAAAGGATTCTKATTCGKTYTCTCTCTTTTGCACGCCATTAACAAAAAAGAAAGAAAGAAAGAAAGCYCATCGGTTTCTCAGATCCACTTCTTCTTCGGTCTGAGCCATGGCTTCTAAGAGGATTCTGAAAGAGCTTAAGGATTTGCAGAAGGATCCTCCTTCTAACTGCAGCGCAGGTCCGGTGGCTGAGGACATGTTCCATTGGCAAGCAACTATCATGGGACCTCCTGACAGTCCTTACGCTGGAGGAGTCTTTTTGGTTTCCATTCACTTTCCTCCGGATTATCCTTTCAAGCCMCCAAAGGTGTCTTTTAAGACAAGGGTG…	891	6	AT3G08690.1	UBC11 (ubiquitin-conjugating enzyme 11); ubiquitin-protein ligase		Identical to Ubiquitin-conjugating enzyme E2-17 kDa 11 (UBC11) [Arabidopsis Thaliana] (GB:P35134;GB:Q9M9J1); similar to UBC10 (UBIQUITIN-CONJUGATING ENZYME 10), ubiquitin-protein ligase [Arabidopsis thaliana] (TAIR:AT5G53300.2); similar to UBC10 (UBIQUIT	97.3	148	4	0	181	624	1	148	3e-84	308
All.Contig_1353	GGGGAACCYCTCGGTTTCAGATCSAATTTCAACAACTTCGACTCCTCTAGGGTTTTCTGATCACTTGTTGTTCGGTTGTTTAGCGTGTCTGAGCCATGGCTTCGAAGAGGATTCTGAAAGAGCTCAAGGATTTGCAGAAGGATCCTCCTTCTAACTGCAGCGCTGGTCCCGTGGCTGAGGACATGTTCCATTGGCAAGCAACTATCATGGGACCTCCTGACAGTCCCTACGCAGGAGGAGTGTTTTTGGTTTCCATTCACTTTCCTCCGGATTATCCCTTCAAGCCACCAAAGGTGTCTTTCAAGACAAGGGTATACCACCCAAACATCAACAGCAACGGAAGCATTTGTCTTGATATCCTGAAAGAACAGTGGAGCCCTGCTCTCACCATCTCCAAGG…	775	9	AT3G08690.1	UBC11 (ubiquitin-conjugating enzyme 11); ubiquitin-protein ligase		Identical to Ubiquitin-conjugating enzyme E2-17 kDa 11 (UBC11) [Arabidopsis Thaliana] (GB:P35134;GB:Q9M9J1); similar to UBC10 (UBIQUITIN-CONJUGATING ENZYME 10), ubiquitin-protein ligase [Arabidopsis thaliana] (TAIR:AT5G53300.2); similar to UBC10 (UBIQUIT	97.97	148	3	0	96	539	1	148	1e-84	309
All.Contig_1354	GCAGTGGTATCAACGCAGAGTGGCCATTACGGCCGGGGAGAAATAAACACACATGCATATATACAAACAGAAGAAAAATAAAAAGAACTGATCAGAAGAAAGAAAAAATGAAGAAGACAGGGAGATTAGGGAAAGAGAGAATAGCATCTCAAAAAGAAGAAGAAGGAACAGTGAGGAAAGGGCCATGGACAATGGAAGAAGATTTGATCCTCTTTAATTACATACTTAATCATGGTGAAGGTCTTTGGAACTCTGTCGCCAAAGCCTCTGGTCTAAAACGTACGGGAAAAAGTTGTCGGCTCCGGTGGCTGAACTATCTCAGGCCAGATGTGCGGCGAGGGAACATAACAGCAGAAGAACAGCTTTTGATCATTCAACTTCAGGCTAAGCTTGGAAACA…	785	5	AT3G01530.1	AtMYB57 (myb domain protein 57); DNA binding / transcription factor	Member of the R2R3 factor gene family.	similar to ATMYB21 (MYB DOMAIN PROTEIN 21), DNA binding / transcription factor [Arabidopsis thaliana] (TAIR:AT3G27810.1); similar to MYB24 (myb domain protein 24), DNA binding / transcription factor [Arabidopsis thaliana] (TAIR:AT5G40350.1); similar to My	78.54	205	42	5	108	716	5	204	3e-87	318
All.Contig_1355	GATATGCTTTTGGAGCATTGACACATGGGAGAAGAGARAATCAGTTGCAATACAAATGCCAGCAGGAAAAGCCGCCGCCAATRGAGACACGCGTGTACAGTTCCATGTGGATCAGATCCGTTTCCTGGCAGTCCACGAGACACAACTAGCGATATTTGATGCTTCCAAGATGGAATGCATCCGACAGTGGATTCCTCAAGACTCGTTGTCTGCTCCTATATCTTCAGCAGTGTATGCGTGTAACAGCCAGTTGATCTACACCACTTTCCGCGATGGTAACATTGGAGTGTTCGACGCAGACACTCTTAGATTAAGATGTCGTATCTCTCCATCCGCCTACTTGCCTCAAGGGAACCAAGGCTTGTCCCCTTTAGTTGTGGCAGCTCACCCGCAAGAGCC…	822	4	AT5G27030.1	TPR3 (TOPLESS-RELATED 3)		similar to TPR1 (TOPLESS-RELATED 1) [Arabidopsis thaliana] (TAIR:AT1G80490.2); similar to TPR1 (TOPLESS-RELATED 1) [Arabidopsis thaliana] (TAIR:AT1G80490.1); similar to TPR2 (TOPLESS-RELATED 2) [Arabidopsis thaliana] (TAIR:AT3G16830.1); similar to Lissenc	90.71	183	17	2	2	550	928	1108	2e-93	338
All.Contig_1356	GGAGATTCCATTTCATTCTCGTCCTCAAAGAAAGCGAATCTAGGGTTTTCACAATTTCGAAGGAAGATGGCGATGCAGAAGGCTAAAGAGATCGTTTCCGGCAACGCCGTCGTTGTTTTCAGCAAGTCGTTTTGCCCATACTGTGTGAGAGTGAAGGAGCTTTTGCAGCAATTGGGAGCCAAATTCATCGCCGTTGAGCTCGACAAAGAGAGTGATGGTAGCCAAGTTCAATCAGCTCTGGCAGAATGGACAGGACAACGCACCGTTCCCAATGTGTTCATAGGTGAAAAACACATCGGTGGCTGCGATTCTGTAACAAACCTGCACAGAGACGGTAAGTTAGTTCCTATGTTGACCGAAGCTGGAGCTATCGCTGCAACAGCTGGAACTACTTCTTCT…	646	9	AT5G40370.1	glutaredoxin, putative		Identical to Glutaredoxin-C2 (GRXC2) [Arabidopsis Thaliana] (GB:Q9FNE2); similar to glutaredoxin, putative [Arabidopsis thaliana] (TAIR:AT5G63030.1); similar to glutaredoxin [Tilia platyphyllos] (GB:AAL04507.1); contains InterPro domain Thioredoxin-like	82.29	96	17	0	67	354	1	96	6e-42	167
All.Contig_1357	GACATAACCCGTTTTGAGTATTACACGGTGGGGAAGTACGATCCTAAGAAGGAGAAGTACGTACCAAACGGTGATACACCCGATGGTTGGGACGGTTTGAGATTCGATTATGGTAACTTCTATGCTTCCAAGACATTCTTTGACTACAAAAAGAATAGAAGAATCTTGTGGGGTTGGGCCAATGAATCGGACACCGTTGAAGATGATATCTCCAAGGGTTGGGCTGGTCTTCAGGTGATTCCGAGAACGGTGCTTCTTGATGCAAACAAGAAGCAACTAGTGTTTTGGCCTATTGAAGAAATAGAGTCATTAAGAAGTAACTACGTACGAATGAACAACAAAAACATCAAGACGGGTCAACGCTTAGAAGTCAAAGGAATCACTCCTGCTCAGGCCGAT…	1270	2	AT2G36190.1	ATCWINV4 (ARABIDOPSIS THALIANA CELL WALL INVERTASE 4); hydrolase, hydrolyzing O-glycosyl compounds		similar to ATCWINV2 (ARABIDOPSIS THALIANA CELL WALL INVERTASE 2), hydrolase, hydrolyzing O-glycosyl compounds [Arabidopsis thaliana] (TAIR:AT3G52600.2); similar to ATCWINV2 (ARABIDOPSIS THALIANA CELL WALL INVERTASE 2), hydrolase, hydrolyzing O-glycosyl co	70.57	316	83	5	1	918	276	580	3e-120	428
All.Contig_1358	GGGCTTCTGTTCGAGATGAAGTGGACAAAATGATCCGGTCGGTATCTAGTAACGTTGGTAAGTTAGCTATGTGCGGTAAAATATGTAAAAAGTAAAAACAACAAACAATGTTTCTCTCTTTTATACGTACGTATTTTAACAGCAAAACCAAAAAAAATGTAGGTAAGTCTATAAACGTCGGGGAGCAAATTTTCGCCCTGACCCGAAACATAACTTACCGGGCAGCGTTCGGGTCAGCTTGCGAAAAGGGACAAGATGAGTTCATAAGAATCTTACAAGAGTTCTCTAAGCTTTTTGGAGCCTTCAACGTAGCAGATTTCATACCATATTTTGGGTGGATCGATCCACAAGGGATAAGCAAGCGGCTCGTGAAGGCCCGTAATGATCTAGACGGATTTA…	1466	6	AT4G36220.1	FAH1 (FERULATE-5-HYDROXYLASE 1); ferulate 5-hydroxylase	encodes ferulate 5-hydroxylase (F5H). Involved in lignin biosynthesis.	Identical to Cytochrome P450 84A1 (CYP84A1) [Arabidopsis Thaliana] (GB:Q42600); similar to cytochrome P450, putative / ferulate-5-hydroxylase, putative [Arabidopsis thaliana] (TAIR:AT5G04330.1); similar to cytochrome P450 [Isatis tinctoria] (GB:ABL07485.	91.63	203	17	0	605	1213	318	520	6e-169	354
All.Contig_1359	GAAAATAAAATAAAATAAAAAAGGATTCATCTTTTGTGCACACTTCAACAAACTTTGTTCCGGCCACGCTCTCTCTTCTCCGTCCGAGTGTCGTCTCTCTCTACTCTCTCTCTCCGTCGCCGAGTGACTCCATCTGAAGAAGATCGGAGTTTTGTAGCTGATTCGCTGTTGATACTAATTCAGCAGCCATGAGCTCGGTTTTGCAGGGTTTTACGAAGTCACTCGCCATGACTTTTGTCTCCGAGATTGGTGATAAGACSTTCTTCGCCGCCGCTATTCTGGCGATGCGTTATCCTAGGAGACTTGTGTTGGCTGGTTGTGTATCRGCTCTGATTGTYATGACTATCCTCTCTGCTACTGTTGGATGGGCTGCTCCAAATCTGATCTCTCGCAAATGGA…	798	10	AT1G25520.1			similar to unknown protein [Arabidopsis thaliana] (TAIR:AT1G68650.1); similar to unnamed protein product [Vitis vinifera] (GB:CAO42107.1); contains InterPro domain Protein of unknown function UPF0016; (InterPro:IPR001727)	91.58	202	15	1	189	788	1	202	1e-77	286
All.Contig_136	GGAACCACCAAATCGCCGCCATGTTGAGACAAGCTTCTCGCCTCCTCTCCCGATCCGTCGCCGCCGGAACCTCTAAATCGGCGACGGCTCGTGGCTTCTCAACGGAAGTTCCGTCGACGATCGATTCGACGTTCGTGGAGTCATGGAAGAAAGTCGCGCCGAACATGGACCCGCCACAGACTCCTTCTTCCTTCATGAAGCCTCGTCCGTCGACTGCCTCTTCGATTCCGACGAAGCTCACCGTCAATTTCGTGCTCCCTTACGCATCTGAGCTTTCCGGGAAAGAGGTCGACATGGTCATTATTCCCGCGACAACAGGACAAATGGGTGTTTTGCCTGGACACGTTCCAACAATCGCTGAGCTGAAACCTGGTATCATGTCCGTCCACGAAGGCACTG…	758	2	AT5G47030.1	ATP synthase delta' chain, mitochondrial		Identical to ATP synthase subunit delta', mitochondrial precursor [Arabidopsis Thaliana] (GB:Q96252); similar to hydrogen-transporting ATP synthase [Brassica rapa] (GB:ABL97963.1); contains InterPro domain ATPase, F1 complex, delta/epsilon subunit; (Inter	88.18	203	24	0	21	629	1	203	6e-99	357
All.Contig_1360	GGSWAAACACACACCAGAGAAAGTAATATGAGCAATCATCAAACCACGATGTTGAAGCAACTAGAGCCATGGTGCGAGCTTAAAGACAAAGTGGTTCTTCTGACCGGAGCTTCTTCTGGTATAGGAAGAGAAGTCTGTCTTGATCTGGGCAAAGCTGGCTGTAAGATTATCGCAGCAGCTCGCCGTGTCGACCGTCTCGAATCTCTTTGCTCTGAAATCAACAGCTTAAGTTCAACCGGGATCCAATTAGCCGCACCGCTCGAGCTAGACGTTTCATCAGACGCAGCCACCATTCAAAAAGCGGTCAAACAAGCTTGGGACATCTTCGGAAAGATAGATGTGTTGATCAACAACGCTGGAATCAGAGGCAATGTCAAGACGAGTTTAGATCTGACTGAA…	724	4	AT3G55290.1	short-chain dehydrogenase/reductase (SDR) family protein		similar to oxidoreductase [Arabidopsis thaliana] (TAIR:AT3G55310.1); similar to unknown [Populus trichocarpa] (GB:ABK93994.1); contains InterPro domain Glucose/ribitol dehydrogenase; (InterPro:IPR002347); contains InterPro domain Short-chain dehydrogenase	85.22	230	34	2	28	717	1	228	1e-109	392
All.Contig_1361	GATCACTTCAAATCTCTATCTCGCTCTCTCTTTCGTACAAGCTTTCGCCGTGGTTTAAGTTTCTGTGAGAGATCGAAGCTATGTCTCAGACCGTTGTTCTAAGAGTGGCTATGTCATGCGAAGGATGTGTTGGAGCTGTTAAAAGAGTTCTCGGTAAAATGGAAGGCGTGGAGTCATTTGATGTGGATATAAAGGAGCAAAAGGTGACAGTGAAAGGCAATGTGCAGCCCGACGCTGTTTTGCAGACCGTATCAAAAACCGGAAAGAAATCGGCTTTCTGGGACACAGAGGCTGAAACCGCCAAGGCCTAAGGAGAAGCAGAGCATCTCATGTGGCTCTGTTTTTAATAAAAATCTGTATGGGATCCTTCTTTGTTTCTGTGACTTGTGTCTGAGACAA…	472	4	AT1G66240.1	ATX1; metal ion binding		similar to CCH (COPPER CHAPERONE) [Arabidopsis thaliana] (TAIR:AT3G56240.1); similar to copper chaperone [Populus alba x Populus tremula var. glandulosa] (GB:AAT12488.1); contains InterPro domain Heavy metal transport/detoxification protein; (InterPro:IPR	91.67	72	6	0	69	284	27	98	2e-32	134
All.Contig_1362	GCAACATTGGTTGATTCCTCAAGACCCTTCGAGCCCCCAGTCTGTTGGTACAGTAGCAAGCCGAGTCGAAAACTTGGCTCTTGGTGAGAGCTCGGCAGGTCCAAATGGTGGCTCAAGCAGTCAGCTGCAACCTGCGGGAGCAGAAAACAAAGCTGTTTCAGATGGTCAGCAACAGTCTCCTGGTGGTGTTCCAGGGAGCAACCGCAATGGCTCGGATGGTGCAAACCGTTGAACCATCATGTTTGGAGCTGGTGGTTAGTGCTGGACATGAAATATGTATTATTTCGTCCTGCCTAAAATCAGGAAAAAAAACAATAATGAAGGGGGAATCCAAAAGAGAGAGAGAGAGAGAGAGAGAGAGAGAGAGAGATAAAGGTAAGGCATAAAACCAGGCTAGAG…	1089	2	AT1G79040.1	PSBR (photosystem II subunit R)	Encodes for the 10 kDa PsbR subunit of photosystem II (PSII). This subunit appears to be involved in the stable assembly of PSII, particularly that of the oxygen-evolving complex subunit PsbP. Mutants defective in this gene have reduced amounts of subunit	Identical to Photosystem II 10 kDa polypeptide, chloroplast precursor (PSBR) [Arabidopsis Thaliana] (GB:P27202); similar to Photosystem II 10 kDa polypeptide, chloroplast precursor (GB:P49108); contains InterPro domain Photosystem II protein PsbR; (InterP	76.16	172	41	1	445	960	1	140	4e-58	222
All.Contig_1363	GAAAGGATCCAGGCTTAGTTTTTTCTAATTCTTTTCTCATGTGACTAAATATCCAAGTCACTGATCAAACGTTATCATTGCTTTTGATAGTTAGATATCTTCCACTATATCTTTGTGTGGTTTCTCAGAAAGGGACTAAGAAGACACCAAGATGCAACAAGAGCCAGAGGTGGAGCAGTTCGAGTCCTAGCTAATCCAAACGCGTCATCTCCTCCTCCAGGAAGAGTAAAGGCAAAAAAGGAGGTAATCATGGTAGACCCTCTTGAGGCCAAGAGATTAGCAGCGAAGCAAATGGAAGAGATTAAAGGCAGAGAGAGGCAACAGAGAAGGCGTGAAATAGAGGCTATTAACGGAGCCTGGGCAATCATAGGACTCACCATTGGCCTTATAATCGAAGCC…	698	7	AT4G28025.1			similar to unnamed protein product [Vitis vinifera] (GB:CAO66511.1); contains domain Chlorophyll a-b binding protein (SSF103511)	82.79	122	16	2	124	474	36	157	3e-39	158
All.Contig_1364	GAGTGAATAAAAAACAAACAGGTGAGTCGCTTCGAKGCKGTGATCGAAATGGCGTCGTCTTCTCCAACTCAGCGTACTCACGTCCCGATCCCTCCCGAGCCAGGAGGAGGAAGGTCACTGACGCAAGATGCTAATGAGCCACCTGTTCCTATTCACATAGTGACAGAGCCTTTGCAACTCCCTGCTGATTTTTTAAACCCTTCTCCTGAAAAGAAGCTGGTCATTGGTTTTGACTGCGAGGGTGTTGACCTTTGCCGTCATGGCAAGCTTTGTATCATGCAGATTGCATTCCCTAATGCGATATACCTGGTTGATGTCATCCAAGGTGGAGAGGTGCTTATGAAAGCGTGTAAGCCTGCACTCGAGTCTGCTTACATCACAAAAGTCATTCACGATTGC…	1111	5	AT2G25910.1	3'-5' exonuclease domain-containing protein / K homology domain-containing protein / KH domain-containing protein		similar to unknown protein [Arabidopsis thaliana] (TAIR:AT2G25920.1); similar to hypothetical protein [Vitis vinifera] (GB:CAN82846.1); contains InterPro domain Polynucleotidyl transferase, Ribonuclease H fold; (InterPro:IPR012337); contains InterPro doma	92.86	280	20	1	49	888	1	279	0	539
All.Contig_1365	GGGCTTATCTTAAGACTTAAGATTACAGAGGCGATGGCGATTAACGGCGAAGATCGCATCTCCGGCGAACGCCCGATCATCATGGTCACCAACGACGACGGGATAGACGCGCCTGGTCTCCGTTCTCTCGTTCGCGTCCTCGTCTCCACCAACCTCTACGACGTCCGCGTCTGCGCTCCCGATTCGGAGAAGTCTGCTGTTAGTCACAGTATCATATGGAGTAGACCTCTCACTGCACACCGTGTTGAGATTGAAGGAGCTGAGGCCTATGCTGTTTCTGGAACCCCTGCGGATTGCACTGGTTTGGGCTTATCCGAAGCGCTCTTCCCTTCTCTTCCTGACCTGGTTCTTAGTGGTATAAACGTTGGTAGCAACTGTGGCTACAACATCGTCTACTCT…	717	4	AT4G14930.1	acid phosphatase survival protein SurE, putative		similar to acid phosphatase survival protein SurE, putative [Arabidopsis thaliana] (TAIR:AT1G72880.2); similar to acid phosphatase survival protein SurE, putative [Arabidopsis thaliana] (TAIR:AT1G72880.1); similar to unnamed protein product [Vitis vinifer	89.08	229	23	1	34	714	1	229	2e-115	411
All.Contig_1366	TCATAGTCAAAAGAAGAGTTTGATCCTGGCTCAGAAGGAACGCTAGCTRTATGCTTAACACATGCAAGTCGAACGTTGTTCCCTGGGAGCTAGTCAGAAGGAATGGAGGCTCCTAGCTCAAGGTAGCTTGTCTCACCCAAGAGGTGGGAAGAGTTGTGAACAAAGTGGCGAACGGGTGCGTAAGGCGTGGGAATCTGCCGAACAGTTCGGGCTAAATCCCGAAGAAAGCTAGAAAGCGCTGTTTGATGAGCCTGCGTAGTATTAGGTAGTTGGTTAGGTAAAGGCTGACCAAGCCGATGATGCTTAGCTGGTCTTTTCGGACGATCAGCCACACCGGGACTGAGACACGGCCCGGACTCCCACGGGGGGCAGCAGTGGGGAATCTTGGACAATGGGCGC…	1657	11	AT2G19120.1	tRNA-splicing endonuclease positive effector-related		similar to tRNA-splicing endonuclease positive effector-related [Arabidopsis thaliana] (TAIR:AT4G30100.1); similar to hypothetical protein OsI_031497 [Oryza sativa (indica cultivar-group)] (GB:EAY77538.1); similar to hypothetical protein [Vitis vinifera]	26.87	67	49	0	1193	1393	144	210	5.9	29.6
All.Contig_1367	GACATTACTTCTTCAAATTTCATTCASATTCCAAAGATCCAAAAATGGAATCAGATCTTGTCTCCGAGCATCCTCCCTTCATCAGGATTTACAAAGACGGTCGCGTTGAGCGTCTCACCGGCACCGAAACCATTCCAACATCACTAGACAAAACAAACGACGTCGTTTCGAAAGACGTACAATACTCACGGGAGCATAACCTCTCCGTCCGTCTCTTCCTTCCTCACAAAGCCACCGCCGGTACCAACAGTAAGAAACTACCTCTTCTCATCTACATCCACGGCGGAGCTTGGATCATCGAGTCACCTTTCTCTCCCACCTACCACAACTACGTAGCCGACGTCGTCAAATCTGCTAACTGCCTCGCCGTATCGATCCAGTACCGCCGCGCGCCGGAGC…	793	4	AT1G49660.1	ATCXE5 (ARABIDOPSIS THALIANA CARBOXYESTERASE 5); carboxylesterase	Encodes a protein with carboxylesterase whose activity was tested using pNA.	similar to cell death associated protein-related [Arabidopsis thaliana] (TAIR:AT1G49650.1); similar to CXE carboxylesterase [Malus pumila] (GB:ABB89010.1); contains InterPro domain Alpha/beta hydrolase fold-3; (InterPro:IPR013094)	78	250	54	1	45	791	1	250	1e-114	409
All.Contig_1368	GGATGGTCTACGCGAAGCAGTCAACAGGAGCCGAAGTTTTAGAGAGGAGAGAAATGAGGTTGTTCGATCCATGGCCCGTGTTCTTCAAGAGGGAATGGAAACGTACCTGGCCGTTCCTCACCGGTTTCGCCGTAACCGGCGTCCTCATCACCAAGCTCACCGCTGGATTCACTGAGGAAGACGCCAAGAACTCAAAGTTCGTCCAACAACACAGGCGGTGATCACTTGTTTATGAAAACTATTGCGCCAGTGCTTCCGCTTTCAAACCCTATTCTAATAACATCAAAAGAGAAGTGTTCTCTCTTGTCCTTTCATCATTTTGTTTTGTTTTTTCTTTTTCACAACTCTTGAAACAAGCTTTTAAATAAGCCTTGCATTTGTGAATGATTGAATTCACCA…	440	5	AT5G59613.1			similar to unknown protein [Arabidopsis thaliana] (TAIR:AT3G46430.1); similar to mitochondrial ATP synthase 6 KD subunit [Oryza sativa (japonica cultivar-group)] (GB:BAB21526.1)	96.36	55	2	0	54	218	1	55	6e-27	116
All.Contig_1369	GAACGCAGAACAACTTTTGTGGAGGAGAGAAAGCGATATAACACACACACAGAGATATACATCTTCAATAGTTAAKAGTTTTCTATATACAGAAGAAGTGTGTGTGATAGAGAGACATCAGATACAAAAGCAAAAGAAATGCAACAGCACCTGATGCAGATGCAGCCCATGATGGCTGGTTACTACCCCAGCAATGGTCACCTCTGATCATATTCAGCAGTACTTGGACGAGAACAAATCGTTGATTCTGAAGATAGTTGAATCTCAAAACTCGGGAAAGCTCAGCGAGTGTGCCGAGAACCAGGCAAGGCTTCAACGCAACTTAATGTACTTAGCTGCAATTGCAGATTCTCAGCCTCAACCTCCAAGCATGCATAGCCAGGGAGAAGGAGGGTCACA…	950	4	AT5G28640.1	AN3 (ANGUSITFOLIA3)	Encodes a protein with similarity to mammalian transcriptional coactivator that is involved in cell proliferation during leaf and flower development. Loss of function mutations have narrow, pointed leaves and narrow floral organs. AN3 interacts with membe	similar to GIF3 (GRF1-INTERACTING FACTOR 3) [Arabidopsis thaliana] (TAIR:AT4G00850.1); similar to unknown [Populus trichocarpa] (GB:ABK94681.1); contains InterPro domain SSXT (InterPro:IPR007726)	73.71	194	34	4	188	718	17	210	1e-36	150
All.Contig_137	GGAATCTCCTCSGACAAAAATGGCCGCAATCAGTTTCTCCTCCGTGCACGCCTCACCCTCTCCCCGTGTGTTTCGTCCACAAACTTCCCGAAATACCCCTGGCCTTACTCTCTATTCACGCTTCACCCCATCCTTCTCAATCTCATTCCCCTCTCTCTCCTCCACGCTCCGCGTCGACACAGTCCGCTCCCGCCGTCCCTTCCYAATCGCCTCCGCCGTCAAGTCGCTGGGGGAGACGGAGCAGCTTCCCATAGCGGAGGCTGAGTCGATTCCGGCGGAGTCCGGCGTCTACGCCGTCTACGATAAGAGCGACGAGCTTCAGTTCGTCGGAATATCTCGGAACATCGGGGCGAGCGTATCTACGCACGTGAAATCGGTTCCGGAGCTTTGCGGCTCCGT…	744	2	AT2G38270.1	CXIP2 (CAX-INTERACTING PROTEIN 2); electron carrier/ protein disulfide oxidoreductase	Encodes protein homologous to CXIP1. CXIP1 is a PICOT domain containing protein interacts with CAX1, a high capacity calcium transporter. However, CXP2 does not interact with CAX1 and only moderately activates another calcium transporter CAX4.	Identical to Monothiol glutaredoxin-S16, chloroplast precursor (GRXS16) [Arabidopsis Thaliana] (GB:Q8H7F6;GB:O80451;GB:Q8LD13); similar to CXIP1 (CAX INTERACTING PROTEIN 1) [Arabidopsis thaliana] (TAIR:AT3G54900.1); similar to unnamed protein product [Vi	83.54	243	38	3	20	742	1	240	2e-99	358
All.Contig_1370	GACATTTCACCAGTCTCTCTTTTCCTCTTCCTCGCTCTAAAAGGTCGCTACGATGATGGCTTCGACTTTTCAAGAAAACTGTATTTCAGTAATCAACGGAGCTCCAAGTTGGGCTGTTTTCTTTCTTTTTGATCTTCTCGACAATTTTCTTTGCATCGTTTTCAGATTCCTCGACCAAGTTATGGAAGAAAAACTAGAGTCATGCCAATGTAATAATCCTCAAGAGACATCCGGATACGAGTTTCTTTCAGACCATCAACACTTRTCCGAGACTCTTTACCGTAGGAGAAACATTTTCCGACAAGCCGGTTTTCTCCGGTTTGCTAGAAAACTCCCAGAGATCACCAAGAAAATCGGTATAGCTACTTTCTTGAGAAATTTCCTTTTTCCCGAGAAAAT…	1567	5	AT5G17720.1	hydrolase, alpha/beta fold family protein		similar to hydrolase, alpha/beta fold family protein [Arabidopsis thaliana] (TAIR:AT5G17780.1); similar to unnamed protein product [Vitis vinifera] (GB:CAO45431.1); contains InterPro domain Alpha/beta hydrolase; (InterPro:IPR003089); contains InterPro dom	76.15	218	49	2	53	697	1	215	0	320
All.Contig_1371	GGCGACTTCAGTGGAGGTTTCTGCTTTTATTGGTTTCCTGCATTAAGTGTTTTTGTTTTTTTGTTTTTTTTCAGGTCAAGGATATAATGGATCTTGAGTCTGTGCATATGGCTTATCTAAGTGAAGCTCTGCGCATATGTTTTCTATCTGATGAAACCCGAGTCATATCAAACACCATAGAGAACATCTTACAATGCGCACTGGACTTCCGGTCTTGTCTTGCTGGAGGCATTCAAAATACAGCTCGAGTTCCAAATGATTCATGGTCGAAAACGCTAGGCATAAACACATCTCAGGTGATAGTGGTGAAGCAGAAGTTTGAGAAAGAGTTGAAGAATCTGCATTTGTGTCACCTGAAATCACCAGAACACGAGAGGTCTGGCCTCTCTCGCTTCAGGG…	1750	5	AT3G43610.1	tubulin binding		similar to SPC98 (SPINDLE POLE BODY COMPONENT 98) [Arabidopsis thaliana] (TAIR:AT5G06680.1); similar to unnamed protein product [Vitis vinifera] (GB:CAO71645.1); contains InterPro domain Spc97/Spc98; (InterPro:IPR007259)	79.07	129	27	0	81	467	1079	1207	5e-56	216
All.Contig_1372	GATTGATGCTGTTGGTAGGCAGAGAGGGACTGGGATTGGAGGAGGTAATGATGAAAGAGAGCAGACCTTGAATCAGCTCTTGACTGAGATGGATGGGTTTGAGGGTAACACTGGTGTTATTGTTGTTGCTGCTACTAATAGAGCTGATATTCTTGACTCTGCCTTGCTGAGACCAGGGCGTTTTGACCGGCAGGTGTCTGTTGATGTTCCAGACGTCAAGGGAAGAACAGATATACTCAAGGTTCACTCAGGGAACAAGAAATTTGAGAATGGTGTTTCACTTGAAGTGATAGCCATGAGAACGCCTGGATTTAGCGGAGCTGATCTTGCAAACCTCTTGAACGAGGCGGCTATATTGGCTGGACGACGTGGGAAGACAGCGATATCATCGAAAGAGAT…	1265	4	AT1G06430.1	FTSH8 (FtsH protease 8); ATP-dependent peptidase/ ATPase/ metallopeptidase/ zinc ion binding	encodes a FtsH protease that is localized to the chloroplast	similar to VAR2 (VARIEGATED 2), ATP-dependent peptidase/ ATPase/ metallopeptidase/ zinc ion binding [Arabidopsis thaliana] (TAIR:AT2G30950.1); similar to ATFTSH6/FTSH6 (FtsH protease 6), ATP-dependent peptidase/ ATPase/ metallopeptidase/ peptidase/ zinc i	97.15	351	10	0	2	1054	321	671	2e-174	608
All.Contig_1373	GAAAAACCCGGGGGCTTATTACCTAACAAACTCAATCAACATCTTTCTTATATAATTAGTGAATCTCAATCCGTCCTTATTACAAAAATCTCCCCAGAAATCTTAGAAAACAGAATCTAGAAGACAAAACAAGATGCGGATGAGCTGTAATGGATGCAGAGTTCTTCGGAAAGGGTGTAGTGATGATTGTAGTATACGACCGTGYTTGKSTTGGATCAAATCGCCTGAAGCGCAAGCAAACGCAACGGTGTTTCTCGCCAAGTTCTATGGCCGTGCTGGACTCATGAACCTCATCAACGCCGGTCCCGATCACCTTCGTCCTGGGATTTTCCGATCGTTGTTGCATGAAGCTTGTGGGAGGATTGTGAATCCGATCTACGGTTCGGTTGGTTTGTTATG…	1118	4	AT3G02550.1	LBD41 (LOB DOMAIN-CONTAINING PROTEIN 41)		Identical to LOB domain-containing protein 41 (LBD41) [Arabidopsis Thaliana] (GB:Q9M886;GB:Q8LDD8); similar to LBD40 (LOB DOMAIN-CONTAINING PROTEIN 40) [Arabidopsis thaliana] (TAIR:AT1G67100.1); similar to seed specific protein Bn15D17A [Brassica napus]	79.32	266	48	3	134	910	1	263	5e-106	381
All.Contig_1374	GACAACCTCCATGTCCCATATATCTTAAGCAGCAAGAGAACTCAAACAGTTTAGTTTTCTTCAAAACTAGTTTGTTTTTGGGTTTTAGTTGGTATCGTCGGAAGAGAGAGAAAATGTTGGGAATTTTCAGCGGAGCTATAGTATCATTGCCGGAAGAGCTGGTGGCTGCCGGGAACCGAACTCCGTCGCCGAAGACAACCGGATCGGTCCTAGTCAACAAGTTCGTAGAGAAAAATCCCTCTGCCGTGTCCGTACAGGTCGGCGACTACGTGCAGCTTGCTTATAGCCACCACAAAGAGAGTCCTCTCCGGCCAAGGTCATTTGGGGCTAAGGATGAGATATTCTGCTTGTTCCAAGGCTCACTTGACAACCTAGGAAGCCTTAAACAACAATATGGGC…	1210	2	AT5G19140.1	auxin/aluminum-responsive protein, putative		similar to unknown protein [Arabidopsis thaliana] (TAIR:AT5G43830.1); similar to aluminum-induced protein [Brassica rapa] (GB:ABV89631.1); contains domain PTHR11772 (PTHR11772); contains domain G3DSA:3.60.20.10 (G3DSA:3.60.20.10); contains domain SSF56235	86.27	51	7	0	743	895	183	233	9e-116	94.4
All.Contig_1375	GACATCGATTACAAATCTCGCTTCTCTTCAATTCAATCCCTCGAGAAAAAGTCGCATCTAGACAATGGCTCGTACGAAGCAAACCGCTAGAAAGTCCACCGGAGGCAAAGCTCCCAGGAAGCAGCTCGCCACCAAGGCGGCGAGGAAGTCTGCTCCGACCACCGGAGGAGTCAAGAARCCKCAYCGTTACCGTCCCGGAACCGTGGCGCTTCGTGAGATCAGGAAGTACCAGAAGAGCACGGAGCTTTTGATCCGTAAGCTTCCCTTCCAGCGTCTGGTTCGTGAAATCGCTCAGGACTTCAAGACGGATCTGAGGTTCCAGAGCCACGCSGTGTTGGCTCTCCAGGAGGCGGCTGAGGCGTACCTTGTGGGTTTGTTCGAGGATACTAATCTCTGCGC…	737	13	AT5G10980.1	histone H3		Identical to Histone H3.3 (HTR8) [Arabidopsis Thaliana] (GB:P59169;GB:Q6NR95); similar to histone H3.2 [Arabidopsis thaliana] (TAIR:AT4G40040.1); similar to histone H3.2 [Arabidopsis thaliana] (TAIR:AT4G40040.2); similar to histone H3.2 [Arabidopsis thal	100	136	0	0	65	472	1	136	1e-71	266
All.Contig_1376	TAGCTAAACGAATCAAGCATAACAACACCGCTTACGAGAATTACCACAGGATCTTTGTCCCTGAAGGAAAGCCTCTGAGAGAGAATCCCAAGGAGCCTTTGAGGGTTAATGTTCTGTTTCAACACATTCTTGGTTCAACTGTCAGAAGCTGAAGCTCCCTGAGGGATGTGGTTACGAGTTCCAAATGCAGTATGGGTCCATTGGTTGGTCCGTTGGTGCTACTCTAGGCTATGCTCAAGCCATACCAAACAAGCGTGTGATTGCTTGTATTGGAGACGGTAGTTTCCAGGTTACCGCACAGGATGTGTCGACCATGATAAGGTGTGGGCAGAAGACTATAATCTTTCTCATCAACAATGGAGGGTACACCATTGAAGTGGAGATCCATGATGGTCCTTA…	850	4	AT5G54960.1	PDC2 (PYRUVATE DECARBOXYLASE-2); pyruvate decarboxylase	pyruvate decarboxylase-2	similar to PDC3 (PYRUVATE DECARBOXYLASE-3), pyruvate decarboxylase [Arabidopsis thaliana] (TAIR:AT5G01330.1); similar to pyruvate decarboxylase, putative [Arabidopsis thaliana] (TAIR:AT4G33070.1); similar to pyruvate decarboxylase, putative [Arabidopsis t	97.69	173	4	0	128	646	435	607	2e-118	360
All.Contig_1377	GGCGAGCAATCTCCAATAATCAAACAAGCTACCTTCTTTCACATCTATATTCCTCCATAGCTGAAAATAACAAACATATACATATTTCATATAGAAAGACCAAAATACAAAATCGACATCAGTTATATATGGCTGCAAAGACCTCAACCATACTTATTACTATATTCCTTGTAATCAATCTTCTCTTCCTCAACTTCATTCCCCTGGTTGTGGCAGAAAATACTTGTCCAAGAGACCAGCTCAAACTTTCAACTTGCGCAAATATTCTCAACCTCATCAACTTGAATCTTGGCGCACCAGCTATGAGACCTTGTTGCTCTGTTCTCTTAGGTCTACTCGATCTTGATATTGCGCTTTGCTTCTGTAGCGCGCTTAAGCTCAGCATTCTCGGCATCACCA…	640	14	AT4G12530.1	protease inhibitor/seed storage/lipid transfer protein (LTP) family protein		similar to protease inhibitor/seed storage/lipid transfer protein (LTP) family protein [Arabidopsis thaliana] (TAIR:AT4G12510.1); similar to protease inhibitor/seed storage/lipid transfer protein (LTP) family protein [Arabidopsis thaliana] (TAIR:AT4G12520	82.95	88	15	0	213	476	30	117	2e-29	125
All.Contig_1378	GASCTCAGAGGAAATAAAATATCTTGAATCTTAGAGAAGAAGGAAAAGAGAAGARAAGATGACGACSGAGAAGAAAGAGATGGAAGTGGTGAARGRTCTWGACTTGGAGAGRTACATGGGCCGTTGGTACGAGATTGCTTCTTTCCCTTCCAKKTTCCAGCCCAAGAACGGTGYWGACACTCGCGCCACCTACACCCTYAACCCYGACGGCACSGTGMAMGTCTTGAACGAGACGTGGRACGGWGGCAAGAGAGSTTTCATCCAAGGCTCAGCYTWCAARACYGATCCTAAGAGCGACGAGGCYAAGTTCAAAGTYARGTTCTACGTTCCTCCTTTYCTCCCTATCATTCCYGTYACTGGAGATTACTGGGTGYTGTATATYGATCCTGAGTACCAGCA…	696	4	AT5G58070.1	lipocalin, putative		similar to temperature-induced lipocalin [Brassica napus] (GB:ABB02398.1); contains InterPro domain Lipocalin-like (InterPro:IPR013208); contains InterPro domain Lipocalin, bacterial and plant; (InterPro:IPR002446); contains InterPro domain Calycin-like (	83.91	174	28	0	98	619	13	186	4e-88	320
All.Contig_1379	GATAAGTTGCATACTTTATCCGAATCTAGGGTTTGATTCTTCTCTTCTCTTCTCCCGATAATCAGATCCTCGAAACTCTACTCCTCGAATCAGGTCTCAGTTTCTGTGTAGTTTGCCTATCAGATCAACAAAGTTTCATGTCTGAACTTGATTCCCAGGTCCCTACTGCCTTCGACCCGTTTGCTGATGCGAATGCTGAGGACTCAGGTGCGGGAACAAAGGAGTACGTCCACATCCGTGTGCAGCAGCGCAATGGTAGGAAAAGCTTGACAACTGTCCAGGGGCTGAAGAAAGAGTATAGTTACAGCAAGATACTTAAGGACCTCAAGAAGGAGTTTTGTTGCAACGGAACCGTGGTTCAAGACTCTGAACTCGGACAGGTTATTCAGCTTCAAGGCG…	762	5	AT4G27130.1	eukaryotic translation initiation factor SUI1, putative		Identical to Protein translation factor SUI1 homolog 1 [Arabidopsis Thaliana] (GB:P41568;GB:Q9SLK5); similar to eukaryotic translation initiation factor SUI1, putative [Arabidopsis thaliana] (TAIR:AT5G54760.2); similar to eukaryotic translation initiation	99.12	113	1	0	138	476	1	113	2e-59	226
All.Contig_138	CACCAGAAGTTAAGGTTAGTGCACCAGACTTTTGTACTGTAGCCTCCACTGTATGGTTCTCTGACCCAAGCTTGAAACCATGTAAATGGGGCTTTCCATCGATGCATACACGCTCCCACGGCTTCTCAATGATATTAACAATAGCAGTGTRAACCTGTGGATAAAAGGAGCAAAAGTGATTCCCTAAAAGTATYGCAAATTCCTCAACAGAGAGTCGATCTCCACACTCTTTCGCCTTGACATAAACGGTGTTTTTCATGGTATCGGTAGCGACGATGTCGGAGTTATCGTCACGGTGGTAAGAAGAGAGGCAGTGAGAGAGAAGGCTGATGCTAACGTTCCACTCAACAAAGTGATGAGATCCATCGGCGCCTTGACGCCAAACTCTCCCAACTCTCA…	1273	5	AT5G16710.1	DHAR3 (DEHYDROASCORBATE REDUCTASE 1); glutathione dehydrogenase (ascorbate)	The protein undergoes thiolation following treatment with the oxidant tert-butylhydroperoxide.	similar to DHAR2, glutathione dehydrogenase (ascorbate) [Arabidopsis thaliana] (TAIR:AT1G75270.1); similar to dehydroascorbate reductase [Brassica oleracea] (GB:BAD14935.1); contains InterPro domain Thioredoxin-like fold (InterPro:IPR012336); contains Int	35.71	42	27	1	908	1033	63	101	7.2	28.9
All.Contig_1380	GGAGATKACTTTCATTATCTTCCCTTTTCGAGATCGGAGCACTAATTTGAATTCAGAGAAGCGAAAGCGACGCAGAGAAGATGGCGCGTACCAAGCAAACCGCTCGTAAGTCTACCGGAGGAAAGGCACCTAGGAAGCAGCTTGCTACTAAGGCGGCTCGTAAGTCTGCACCAACCACTGGAGGAGTGAAGAAGCCACATCGTTACAGACCTGGAACTGTTGCTCTTCGTGAGATCCGTAAGTACCAGAAGAGTACTGAGCTGTTGATCAGGAAGCTTCCTTTCCAGAGGCTTGTTCGTGAGATTGCTCAGGATTTCAAGACTGACCTGCGTTTCCAGAGCCATGCGGTGCTAGCACTCCAGGAGGCAGCTGAAGCATACCTTGTGGGACTCTTTGAGG…	773	8	AT4G40030.2	histone H3.2		Identical to Histone H3.3 (HTR8) [Arabidopsis Thaliana] (GB:P59169;GB:Q6NR95); similar to histone H3 [Arabidopsis thaliana] (TAIR:AT5G10980.1); similar to histone H3.2 [Arabidopsis thaliana] (TAIR:AT4G40040.1); similar to histone H3.2 [Arabidopsis thalia	100	137	0	0	78	488	28	164	4e-72	268
All.Contig_1381	GATGTGTGTCTCTATTATTATCTAACTAGTTCAGATTCTTCTCCCTCTCAAAGCAACAACAAGTTCTTCTCCTCTCTTTCTTCTTTTCTCTTCATACATCAAACATCATGACTCGCTCCTCTAGATTCCTCGGATCGGCGACGGCGCCACCACCGCCGCAAGAAATCCTCGCCGCGGAAACCGACATGGTCGTGATCCTCTCAGCTCTCCTCTGCGCTCTCATATGCGTAGCCGGCTTAGCCGCCGTAGCTCGCTGCGCCTGGCTCCGCCGTCTCACCGGCGTTAATTCCGCCGCCGTTGGTGAATCTCCGCCGCCGCCGAGCAAAGGTCTCAAGAAGAAAGCGCTCCAGTCTCTCCCTAAATCCACCTTCGCCGCCGGAGACTCGCCGAGCACTTCCG…	867	5	AT4G35480.1	RHA3B (RING-H2 finger A3B); protein binding / zinc ion binding	Encodes a putative RING-H2 finger protein RHA3b.	Identical to RING-H2 finger protein ATL4L (ATL4L) [Arabidopsis Thaliana] (GB:Q9ZT49); similar to RHA3A (RING-H2 finger A3A), protein binding / zinc ion binding [Arabidopsis thaliana] (TAIR:AT2G17450.1); similar to unnamed protein product [Vitis vinifera]	79.21	202	30	4	108	677	1	200	3e-81	298
All.Contig_1382	GATSATCATCATCAACAAACRAWCATCATCAACAGCAGCAGCCATAATAACCTAAACACCTTTCCCATTCCAATAGAAAAGAAAACCTTATGGCCTCCAAGGCGCTCTCTTCTTTCACGGCTAAGCCCGCTGTGTCACTGCTCCCCCATGGCGTCTCCTCCTCTGCCTCTCCGTCTGTTAMGTCTCTGAGCTTCTCAAGGCATACTGGCGGCAGAGGAGTGGTGGTTGCGTCCTCAACGGTAGACACAAACAATATGCCGATGACAGGAGTGGTGTTCCAGCCGTTCGAGGAGGTGAAGAAAGCCGATCTGGCCATTCCAATCACATCTAATGCCTCCCTCGCTCGCCAGAGGTATGCCGACTCTTGCGAGGCTGCCATTAACGAGCAAATCAATGTGG…	976	7	AT5G01600.1	ATFER1 (FERRETIN 1); ferric iron binding	Encodes a ferretin protein that is targeted to the chloroplast. Member of a Ferritin gene family. Gene expression is induced in response to iron overload and by nitric oxide. Expression of the gene is downregulated in the presence of paraquat, an inducer	Identical to Ferritin-1, chloroplast precursor (FER1) [Arabidopsis Thaliana] (GB:Q39101;GB:Q8LG19); similar to ATFER4 (FERRITIN 4), ferric iron binding [Arabidopsis thaliana] (TAIR:AT2G40300.1); similar to Ferritin-1, chloroplast precursor (GB:Q96540); c	85.27	258	34	3	90	851	1	255	2e-106	382
All.Contig_1383	GACGAAGMAAAATACAATCAAAGGAGAGGCGATAATGGCGGATCAACAAGGAGGAACAGTTCTGGGAGGAGTTCGCGATGTCGATCCAAATGCTAATGATCTTCAAGTCGAGAGTCTCGCTCGTTTCGCTGTCGATGAGCATAACAAGAAGGAGAACGTGAGTCTGGAGTACAGGAGGCTGATTGGTGCGAAAACGCAGGTGGTGGCAGGGACGATGCACCATCTGACGGTGGAGGTGGCTGATGGTGAGACCAAGAAGGTGTACGAGGCCAAGGTTTTGGAGAAGGCCTGGGAGAATCTCAAGARGYTGGAGGACTTCACCCACCTTCGCGATGTTTAGTTTCATTACCTGATAAGCACATCACATTCTACGTGATTAGAGTCYYTGTTTAGTGTTTA…	586	2	AT5G12140.1	ATCYS1 (A. THALIANA CYSTATIN-1); cysteine protease inhibitor	Encodes a cystatin.	Identical to Cysteine proteinase inhibitor 1 (CYS1) [Arabidopsis Thaliana] (GB:Q945Q1;GB:O48589); similar to cysteine protease inhibitor, putative / cystatin, putative [Arabidopsis thaliana] (TAIR:AT3G12490.2); similar to cysteine protease inhibitor, put	85.15	101	15	0	35	337	1	101	1e-45	179
All.Contig_1384	GCACGAAAGATTGAGCGTTTCTTATCACAACCTTTTTTCGTAGCAGAAGTATTTACAGGTTCTCCGGGAAAATATGTTGGGCTAGCGGAAACAATTAGAGGGTTTAATTTGATCCTTTCCGGAGAATTTGATTCTCTTCCTGAACAGGCCTTTTACTTAGTGGGTAACATCGATGAAGCTACTGCGAAGGCTACGAACTTAGAAATGGAGAGTAAATTGAAGAAATGACCTTAAATCTTTGTGTACTGACTCCGAATCGAATTGTTTGGGATTCAGAAGTAAAAGAAATCATTTTATCTACTAATAGTGGACAAATTGGCGTATTACCAAATCACGCGCCGATTGCCACAGCTGTTGATATAGGTATTTTGAAAATACGCCTTAATAACCAATGGTTAA…	668	4	ATCG00470.1		ATPase epsilon subunit	Identical to ATP synthase epsilon chain (atpE) [Arabidopsis Thaliana] (GB:P09468); similar to ATPase epsilon subunit [Capsella bursa-pastoris] (GB:YP_001123379.1); contains InterPro domain ATPase, F1 complex, delta/epsilon subunit; (InterPro:IPR001469)	98.48	132	2	0	225	620	1	132	2e-67	251
All.Contig_1385	GGAGTTTTGAAACTTTACTGCTCACAGAAGAAAAAAACTTATTATCTTCTTGTAAATTTACCGAGAGAGAGAAAAGGGAAGAGACAAGCCAGGATCCGGCCATAGCTGTACAGATCCCCACACCATCCAAAAGGAACCCTAATCATGCCTCCAGGTGCTAAGAAAAGGAAAGCTGCAAAGAAAAAGCAGCAGCAACAACAAGCATCTTCTCCTCAAACTAATCTCATACCCACCACCAACCATGAATCAAGGGAAGAAGATGATGTCAGAATCGAAAAGGAAGTGGGATTGGATACTGATGAGCGCATAGAGATCACTGATTCAAGCCGTGACCATGACAAGAACTCTAGCAGTAGTAGCAGCAGCAGCAGCTCGGATGATGAATCCAGTGAAGTTAAG…	573	4	AT4G18070.4			similar to unknown protein [Arabidopsis thaliana] (TAIR:AT1G29530.1)	53.7	54	13	1	448	573	111	164	2e-08	55.5
All.Contig_1386	GACTCATCATTCCACACACATCTCATTTTACAAACAAAAAAAATCTAAGAGAGAAATATGGCTGGTCTAATGAAGTTGGCATGCTTGGTCTTGGCCTGCATGATCGTSGCCGGTCCAATCACATCGAACGCGGCTCTGAGCTGTGGCACCGTTAGCGGCTACGTGGCACCGTGCATTGGCTACCTGGCCCAGGGTGCGCCGGCCCTTCCCAGAGCGTGCTGCAGCGGCGTTACTAGTCTAAAMAACCTRGCCCGTACAACCCCAGACCGTCAGCAAGCTTGCCGTTGCCTTGTAGGAGCCGCTAACGCCTTCCCTACTCTCAACGCTGCCCGTGCAGCTGGACTTCCTAAGGCATGTGGAGTCAACATTCCTTACAAGATCAGCAAAACCACCAACTGC…	636	7	AT2G38530.1	LTP2 (LIPID TRANSFER PROTEIN 2); lipid binding	Involved in lipid transfer between membranes. Belongs to a family of Lipid transfer proteins. Sequence similarity to other plant/Arabidopsis LPT genes but highest similarity to LPT1. Stress and pathogen-inducible motifs found in the upstream region.Expres	Identical to Non-specific lipid-transfer protein 2 precursor (LTP2) [Arabidopsis Thaliana] (GB:Q9S7I3); similar to LP1 (nonspecific lipid transfer protein 1) [Arabidopsis thaliana] (TAIR:AT2G38540.1); similar to lipid transfer protein [Brassica rapa subs	71.43	119	33	2	58	411	1	118	2e-43	172
All.Contig_1387	GAACTCACTCTTTCTKGTSGGAAGAAACGTTAAGAAGCAACAAAAAAACTCTACAGATGGCGATGATGTCAGCATCTTCGGTGTTTCTTTTGCCGGCCAACGTCACGGCTCCCGCTGGCGCTTCGTCGTCCAGGAACTCCGTGTCTTTCTTACCGATGAGAAACGCCGGTTCTAGGCTCGTAGTCAGAGCAGCCGATGAGGCGGCTCCAGAACCAGCTGCGCCGGAAGGTGCTCCAGCAACTACCGCGGCGCCGGCGGCAGCTGCTGCCACCAAACCCAAGCCGCCTCCTATTGGCCCTAAGAGAGGGGCCAAGGTCAAGATTCTAAGGAGAGAATCCTACTGGTTCAAGAGCGTTGGATCGGTTGTGGCCGTTGATCAGGACCCGAAGACCCGGTACC…	621	4	AT4G28750.1	PSAE-1 (PSA E1 KNOCKOUT); catalytic	mutant has Decreased effective quantum yield of photosystem II; Pale green plants; Reduced growth rate; Subunit E of Photosystem I	Identical to Photosystem I reaction center subunit IV A, chloroplast precursor (PSAE1) [Arabidopsis Thaliana] (GB:Q9S831); similar to PSAE-2 (photosystem I subunit E-2), catalytic [Arabidopsis thaliana] (TAIR:AT2G20260.1); similar to AT4G28750 [Arabidops	81.12	143	27	0	57	485	1	143	1e-41	166
All.Contig_1388	GAGCCGAGCAGATKACAAACCAACAAAASAATCTAAGAACTCACTCTTTCCTGTCTGAACAACAACAAGAAGCAAAAAAGAATCCCCAAAGATGGCGATGATGTCAGCATCTTCAGCCTTTGTTTTGACGTCCAACGTCACGGCGTCCGCAGGCGTTTCCTCGTCCAGGAACTCCGTGTCTTTCTTACCGATGAGAAACGCTGGTTCTAGACTCGTAGTCAGAGCAGCCGAAGATGCGGCTCCTGAAACATCTTCTTCAGAAGGTGCTCCAGCAACTGCCGTGGCTCCGGCTGCAGCTGCCGCCACCAAGCCAAAGCCACCTCCGATCGGCCCTAAGAGAGGGTCCAAGGTCAAGATCCTAAGGAGAGAATCCTACTGGTTCAAGAACGTTGGATCAGT…	670	9	AT4G28750.1	PSAE-1 (PSA E1 KNOCKOUT); catalytic	mutant has Decreased effective quantum yield of photosystem II; Pale green plants; Reduced growth rate; Subunit E of Photosystem I	Identical to Photosystem I reaction center subunit IV A, chloroplast precursor (PSAE1) [Arabidopsis Thaliana] (GB:Q9S831); similar to PSAE-2 (photosystem I subunit E-2), catalytic [Arabidopsis thaliana] (TAIR:AT2G20260.1); similar to AT4G28750 [Arabidops	85.07	134	20	0	119	520	10	143	1e-42	169
All.Contig_1389	GRKGGTGATATCTCCGTCTCCGATCAATTAACAGATCTAGATAAGCTTGTGAAGAGAGATGTCAGGAAGAGGAAAGGGAGGAAAGGGATTGGGAAAAGGAGGAGCGAAGAGGCACAGGAAGGTGCTGAGGGATAACATCCAAGGCATCACCAAGCCTGCGATTCGTCGTCTTGCTCGCAGAGGTGGAGTCAAGCGTATAAGCGGTCTGATCTACGAGGAGACAAGAGGAGTCCTCAAGATCTTCCTCGAGAATGTCATCCGCGACGCCGTTACTTACACCGAGCACGCTAGGAGGAAGACGGTTACTGCTATGGATGTGGTGTATGCTTTGAAGAGGCAAGGACGTACTCTCTACGGGTTCGGCGGTTAATCTACGATGGATTAGCGTTCTCTGTCTTG…	507	4	AT5G59970.1	histone H4		Identical to Histone H4 [Arabidopsis Thaliana] (GB:P59259;GB:P02308); similar to histone H4 [Arabidopsis thaliana] (TAIR:AT5G59690.1); similar to histone H4 [Arabidopsis thaliana] (TAIR:AT3G45930.1); similar to histone H4 [Arabidopsis thaliana] (TAIR:AT3G	100	82	0	0	122	367	22	103	1e-40	162
All.Contig_139	AGAACCGATGAAGTCGACGAGCAAGAGAACTGGCACGACTGTCCTCAATACCTCGGCGACGAAGACTTCTCCGGTCTCGATCTCCTCCACTTCTTCACCCTCCAAGGCTCCGATAAGTCCGGTAACCGAATCTTCCGCGTCGTCGGAAAGTTTTTTTCCCGCTCGTGTGGTGAGTGCAGAGAGGCTGAAGAAGTATATATTCCAGAAGATTAGCAACGAGTGTCCAGAGGGACCTTTCTGCTTGGTTTACATGCATAGCACGGTCCAAAAGGACGAGAACTCGCCTGGGATTACTATCTTAAGATGGATCTACGAGGATCTTCCTTCGGAGATCAAAGAGAGACTCCAAGTTGTTTACTTTGTACACCCTGGTCTTCGTTCGAGGCTTGTTATTGCCAC…	626	1	AT3G10210.1			similar to Rho-GTPase-activating protein-related [Arabidopsis thaliana] (TAIR:AT4G35750.1); similar to unknown [Populus trichocarpa] (GB:ABK94010.1); contains InterPro domain Cellular retinaldehyde-binding/triple function, C-terminal (InterPro:IPR001251)	90.26	154	15	0	164	625	78	231	5e-98	273
All.Contig_1390	GCKCSACATGTATTCTATCTTCTCTCCTCTTCTTCCTTCTAACTCTCCTCCTCAAGAAATATTCTTGAAACCAAACCGCCTCCCAAAAAACAATGGGCGTAGCTGTTCTAAATCCACAGGACTGTCTCAAACAACCTTTCTCCCACATGAAGTATCCTCGTAACCACACCGCATGCCCCAACAGGCATCAGAAGAAGCCGGTTCCAAACCGCACGCGCCGGAGTCCTCCGCGCAATCAGACAACCAGATCTCCTCCTAAAGCTCCGCCTCCGCCTCCTCAACGCGCCGCCGTCTCTTCTTACGTCCCGAAGGGAACGGTTGAGAAGAGTCCCACCAAAAACGTCGTCGTTGGTCAGGTTAGGATCCTGAAGCGCGGCGAGGAGATCCCTAAGAAGACAT…	751	4	AT4G32020.1			similar to unknown protein [Arabidopsis thaliana] (TAIR:AT2G25250.1); similar to unknown [Populus trichocarpa] (GB:ABK93361.1)	67.5	200	63	4	93	686	1	181	1e-60	229
All.Contig_1391	GAATCKGCTGTCTTTATAATTTATCAAAATCGCCGATCGAGACAGGTCGTGAGACCAACGACCATCCGTTCATCGCCGACGGAGAAATCGTGGCCGTCTAATCTAGGGGAAGAAGATCCGATTCCGATTGTAGAAGAATCTTAAAGGGATGGGGAAGAAGAGAAAAGCTACAGCGACGAGCCTCGATGAGGTAGATCGGACTGTTTACGCCTCGTTTCGAACAGCCGCGAACTCGTTATCTCAGCTTTACACTCAGTCCATGAACCACCAGAAACTATCTTTCCAAGCCGGTGAACGCCATGGTCTCGAAAAATTGTACCAATGGATATGGAGACAACAAGAAGGAGGGTCAAGAGTGACATCTATGGATATAATCAATTACATTCAGAACGAGCTAGA…	769	7	AT4G09830.1			similar to unknown protein [Arabidopsis thaliana] (TAIR:AT5G64780.1); similar to unnamed protein product [Vitis vinifera] (GB:CAO43592.1); contains InterPro domain Uncharacterised conserved protein UCP009193 (InterPro:IPR016549)	89.53	191	16	2	149	709	1	191	4e-94	340
All.Contig_1392	GATCTCTTGATTCCAATCCATTATCTCATCCTGTATCCAGTTCTGTAGGGGAAATGGCCACTGTCACTACTCAAGCCTCGGCCTCGATATTCAGACCATGCACTTCAAAGCCAAGATTCCTCACCGGTTCTTCCGGTAGGTTGAACCGAGATTTGTCGTTTAAGTCAATCGGCTCATCATCCTCAAAGACGGCCTCGTTCAAGGTTGAAGCTAAGAAAGGAGAATGGTTGCCCGGTTTGGCATCTCCTGGTTACCTCAACGGCAGTCTTGCCGGGGACAATGGGTTTGACCCATTGGGACTTGCAGAGGATCCAGAGAACTTGAAGTGGTTCATCCAGGCAGAGCTTGTCAACGGACGGTGGGCCATGCTTGGCGTCGCAGGGATGCTTTTGCCGGAAG…	1010	4	AT3G47470.1	LHCA4 (Photosystem I light harvesting complex gene 4); chlorophyll binding	Encodes a chlorophyll a/b-binding protein that is more similar to the PSI Cab proteins than the PSII cab proteins. The predicted protein is about 20 amino acids shorter than most known Cab proteins.	Identical to Chlorophyll a-b binding protein 4, chloroplast precursor (CAB4) [Arabidopsis Thaliana] (GB:P27521); similar to LHCA2 (Photosystem I light harvesting complex gene 2), chlorophyll binding [Arabidopsis thaliana] (TAIR:AT3G61470.1); similar to c	92.86	252	18	1	54	809	1	251	3e-130	461
All.Contig_1393	GGTGTTCACCGTCTACGGAGAGCACTGGCGTAAGATGAGGAGGATCATGACGGTTCCTTTCTTCACCAACAAGGTTGGTGCAGCGGAACAGAGAAGGATGGGAGTTCGAAGCCGCGAGCGGTGGTCGAGGACGTGAAGAAGAATCCAGACTCTGGCGACCAAAGGGATCGTGTTGAGGAAACGCTTGCGGTTGATGATGTACAACAACATGTTCCGTATCATGTTCGATAGAAGGTTCGAGAGTGAAGATGATCCTCTCTTCCTCAGGCTTAAAGCCTTGAACGGAGAGAGAAGYAGRTTGGCTCAGAGCTTYGAGTAYAACTATGGAGATTTCATCCCTATCCTTAGGCCGTTCCTTAGAGGCTACTTGAGGATCTGTCAGGATGTGAAGGACAGAAG…	1328	4	AT2G30490.1	ATC4H/C4H/CYP73A5 (CINNAMATE 4-HYDROXYLASE, CINNAMATE-4-HYDROXYLASE); trans-cinnamate 4-monooxygenase	Encodes a cinnamate-4-hydroxylase.	Identical to Trans-cinnamate 4-monooxygenase (CYP73A5) [Arabidopsis Thaliana] (GB:P92994;GB:O04995;GB:O49834;GB:P92993); similar to CYP98A3 (CYTOCHROME P450, FAMILY 98, SUBFAMILY A, POLYPEPTIDE 3), monooxygenase/ p-coumarate 3-hydroxylase [Arabidopsis th	88.69	389	43	2	2	1165	118	504	3e-180	628
All.Contig_1394	GGAAGTTTTAAGAAAAGCATCAGTCTCGTCTCTTCTACGGCCTTTCAGAATCTAAAGAGATCATAGATGGGTCTTCTCTCCAACAGAATCGATCGATCAAGTTTGAAACCTGGGGATCATATCTACTCGTGGAGGACTGCTTACATCTATGCCCATCACGGTATCTATGTTGGAGATGATAGAGTCGTCCATTTCACTAGAAGAGGCCAAGAAGTCGGAACCGGSACCGTTCTCGATCTCATACTAGTAAGCTCAGGCCCATCACGAGCCCACACGCACTGTCCAACGTGCGTCCCACCCAACGAAGGCCACGGCGTCGTTTCCTCGTGCCTAAAGTGTTTCCTAGCCGGTGGCGTCCTGTACCGCTTCGAGTACTCCGTCAACGCCGCTCACTTCCTC…	975	4	AT5G06370.1	NC domain-containing protein		similar to NC domain-containing protein [Arabidopsis thaliana] (TAIR:AT3G02700.1); similar to unnamed protein product [Vitis vinifera] (GB:CAO50149.1); contains InterPro domain NC (InterPro:IPR007053)	93.06	245	17	1	67	801	1	244	3e-133	471
All.Contig_1395	GACTCATCTGAAAGAAACAAAAAAAATTAAATAAAATAAAAAAAAGAAAAAACGCAGCGATATCCACGCTGCTCCATCGCTCTCTCGCCAGATATCAATCAATCATCGACTCGCTCCTCAGATTTCAGATCCAAATCTACACACAAAAAGCTTCAACATGTCTACCTTCAGCGGCGATGAAACAGCTCCTTTCTTCGGCTTCCTCGGCGCCGCCGCCGCTCTCGTCTTCTCCTGTATGGGAGCTGCTTATGGAACGGCGAAGAGTGGTGTTGGTGTGGCTTCCATGGGAGTCATGAGGCCCGAGCTGGTGATGAARTCCATCGTACCAGTTGTTATGGCTGGTGTGTTGGGTATCTACGGTTTGATTATTGCTGTTATCATCAGTACTGGTATTAACCC…	711	26	AT4G34720.1	AVA-P1 (vacuolar H+-pumping ATPase 16 kDa proteolipid subunit 1); ATPase/ hydrogen ion transporting ATPase, rotational mechanism	vacuolar H+-pumping ATPase 16 kDa proteolipid (ava-p1)	Identical to Vacuolar ATP synthase 16 kDa proteolipid subunit 1/3/5 (AVAP5) [Arabidopsis Thaliana] (GB:P59227;GB:Q39037;GB:Q39038;GB:Q39039;GB:Q42424;GB:Q96298); similar to vacuolar ATP synthase 16 kDa proteolipid subunit 5 / V-ATPase 16 kDa proteolipid	99.39	164	1	0	158	649	1	164	1e-57	219
All.Contig_1396	GGTCTTCAGAGGGATAAAAAAACAGAGCAACGTCTTCATAGAAAAAAAAACAGAGCAACGTCTTCGTAAAAAGTTAAATTCAAAAAAAAAAAAAAACAGAGAAGGATCCAGAGAGAGATGGGAGAAGTGGTGATAATCATTGATGAGACGAAGAGTTCGAAACAGAGAATATCGCGTTGCAGAATCTGTCATGAAGAAGARGCAGAGAGTTTCTTCGAAGTTCCTTGTGCTTGCTCAGGAACCGTTAAGTTTGCACATAGAGATTGCAYACAACGTTGGTGTAATGAGAAAGGAAACACCACTTGTGAAATCTGTCTTCAGGTGTACAGACATGGATATACAGCAATTCCAAAACCAACCAAGATGATCGAAGAAGAAGAAGTCACGATCAGAGAAGGT…	914	4	AT4G02075.1	PIT1 (PITCHOUN 1); protein binding / zinc ion binding		similar to zinc finger (C3HC4-type RING finger) family protein [Arabidopsis thaliana] (TAIR:AT2G02960.1); similar to zinc finger (C3HC4-type RING finger) family protein [Arabidopsis thaliana] (TAIR:AT2G02960.4); similar to zinc finger (C3HC4-type RING fin	77.6	192	39	3	118	681	1	190	7e-76	280
All.Contig_1397	GAGKGAGAAGAGAAAAGKGATTACTCCACTTGTTTGGTCAAATAATGGAAGCGGCGACGAAGCAGAGCGTTACAAACCGCCTTCTCACCGTCAAGTCAGCCTCCGGCAAGACTTACAGTCAATTAGCGGCGGAGACAGGGCTCACCAACGTCTACGTGGCTCAGCTGCTCCGTCGCCAAGCCCAGCTCAAACCCGAAACAGTCCCCAAGCTCCGTGAAGCCTTACCTGCTCTGACCGAAGAACTCATCGCCGCCATGATGTCTCCGCCGTGGAGATCGTATGATCCAAACCTCATCCAAGAACCCACCGTCTACAGGTTGAATGAAGCAGTGATGCATTTCGGTGAGAGTATAAAGGAGATCATCAATGAAGATTTCGGCGATGGCATCATGTCGGCAA…	954	8	AT3G23490.1	CYN (CYANASE); cyanate hydratase	cyanase	Identical to Cyanate hydratase (CYN) [Arabidopsis Thaliana] (GB:O22683); similar to hypothetical protein [Vitis vinifera] (GB:CAN67990.1); contains InterPro domain Cyanate lyase, C-terminal; (InterPro:IPR003712); contains InterPro domain Cyanase; (InterP	92.86	168	12	0	45	548	1	168	1e-85	313
All.Contig_1398	CAGAGGTGAAATTCTTGGATTTATGAAAGACGAACAACTGCGAAAGCATTTGCCAAGGATGTTTTCATTAATCAAGAACGAAAGTTGGGGGCTCGAAGACGATCAGATACCGTCCTAGTCTCAACCATAAACGATGCCGACCAGGGATCAGCGGATGTTGCTTTTAGGACTCCGCTGGCACCTTATGAGAAATCAAAGTTTTTGGGTTCCGGGGGGAGTATGGTCGCAAGGCTGAAACTTAAAGGAATTGACGGAAGGGCACCACCAGGAGTGGAGCCTGCGGCTTAATTTGACWCAACACGGGGAAACTTACCAGGTCCAGACATAGTAAGGATTGACAGACTGAGAGCTCTTTCTTGATTCTATGGGTGGTGGTGCATGRCCGTTCTTAGTTGGTGG…	916	2	AT2G25600.1	SPIK (SHAKER POLLEN INWARD K+ CHANNEL); cyclic nucleotide binding / inward rectifier potassium channel/ potassium channel	mutant has Impaired pollen-tube growth; member of Shaker K+ channel family, also Stelar K+ outward rectifying channel (SKOR) family	Identical to Potassium channel AKT6 (AKT6) [Arabidopsis Thaliana] (GB:Q8GXE6;GB:Q9SLA3); similar to AKT5 (Arabidopsis K+ transporter 5), cyclic nucleotide binding / inward rectifier potassium channel [Arabidopsis thaliana] (TAIR:AT4G32500.1); similar to	36.36	55	35	2	61	225	773	818	2.8	29.6
All.Contig_1399	GGACTGCTTACGTGGCGAGAATGCTCACGGAGACGCCAATGCACGGGACATTCATCTGCACCGTCCCGATGTTCCACACGTACGGACTACTAACATTCGCTATGGCCACCGTAGCCATCGGTTCGACGGTGGTGATCCTCCGGAGATTCGAGCTCAACGACATGATGGCAGCGGTGGAGAAGTATAAAGCCACGACTCTGCTTTTGGTGCCGCCAGTTTTGGTGGCTATGGTCAACGAAGCAGATTCYATCAAGGCGAAGTACGATCTGAGCTCACTTAAGACAGTGAGGTGTGGTGGAGCGCCGTTGAGCAAGGAGGCAACGGAGGGGTTTTTAGAAAAGTACCCAACGGTCAATATATTTCAAGCGTATGCGTTGACGGAGTCAAACGGTGGTGGAG…	1111	4	AT1G20500.1	4-coumarate--CoA ligase family / 4-coumaroyl-CoA synthase family		Identical to 4-coumarate--CoA ligase-like 4 (4CLL4) [Arabidopsis Thaliana] (GB:P0C5B6;GB:Q9LMV7); similar to AMP-dependent synthetase and ligase family protein [Arabidopsis thaliana] (TAIR:AT1G20490.1); similar to unnamed protein product [Vitis vinifera]	85.67	328	46	1	3	983	223	550	1e-155	545
All.Contig_14	TAGGATTTCGATCCTATTGTGTTGGCCTTCGGGATCGGAGTAATGATTAACAGGGACAGTCGGGGGCATTCGTATTTCATAGTCAGAGGTGAAATTCTTGGATTTATGAAAGACGAACAACTGCGAAAGCATTTGCCAAGGATGTTTTCATTAATSACGAKAGAGTTGAGATAGAGAGTGAATTAAAAAAAAAAACAAATGGGTAAGAACAATACCACAATCCTCATCATTGCGATGGTTTTAACCACGGCGATGATAATGGAAGAAGCTAAGAGTTATCCTATATGCAACACCGACACAAACGACTTGCAGAAATGTTCTCCAGCTGTAACTGGAAACAACCCGCCAGCTCCGGGACCCGACTGCTGCGCAGTGGCTAAGTCCGCTGATCTTGAATGT…	798	26	AT5G55450.1	protease inhibitor/seed storage/lipid transfer protein (LTP) family protein		similar to protease inhibitor/seed storage/lipid transfer protein (LTP) family protein [Arabidopsis thaliana] (TAIR:AT5G55410.1); similar to protease inhibitor/seed storage/lipid transfer protein (LTP) family protein [Arabidopsis thaliana] (TAIR:AT5G55410	63.11	103	31	2	199	486	1	103	2e-33	139
All.Contig_140	GGTCTAGTTTACAAACAAATCATTTCCCAGAAAAACAGATCCGAATTTGAATCGGCATAAAAATGGAGAAAGCGATCGAGAGGCAAAGAGTTCTTCTTGAACATCTCCGTCCTTCTTCTTCTTCCTCCCACAGTTTCGAGGGCTCTCTCTCTGCTTCTGCTTGCTTGGCTGGGGACAGTGCTGCTTATCAAAGGACCTCTCTCTATGGAGATGATGTTGTCATTGTCGCGGCACATAGGACTGCACTTTGCAAGTCCAAACGTGGCAACTTCAAGGATACTTATCCTGATGATCTCCTTGCACCAGTTTTGAGGGCATTGATAGAGAAGACAAATCTAGACCCAAGTGAAGTTGGTGACATTGTTGTGGGTACTGTTTTGGCACCGGGTTCTCAGAGAG…	1203	2	AT2G33150.1	KAT2/PED1 (PEROXISOME DEFECTIVE 1); acetyl-CoA C-acyltransferase	Encodes an organellar (peroxisome, glyoxysome) 3-ketoacyl-CoA thiolase, involved in fatty acid b-oxidation during germination and subsequent seedling growth. Mutants have defects in glyoxysomal fatty acid beta-oxidation.	Identical to 3-ketoacyl-CoA thiolase 2, peroxisomal precursor (PED1) [Arabidopsis Thaliana] (GB:Q56WD9;GB:Q93Z35;GB:Q9S7M3); similar to acetyl-CoA C-acyltransferase, putative / 3-ketoacyl-CoA thiolase, putative [Arabidopsis thaliana] (TAIR:AT1G04710.1);	93.29	149	10	0	757	1203	232	380	2e-169	238
All.Contig_1400	GGAGGCAAAGGTCAAGGTAAATCCTTCCAGTGTGAGCTTGTCATGGCCAAGATGGGCATCAACCCAATCATGATGAGTGCTGGAGAGCTTGAGAGCGGGAACGCAGGAGAGCCAGCCAAGCTTATCCGTCAAAGGTACCGCGAGGCAGCAGACCTGATCAAGAAAGGAAAGATGTGTTGTCTCTTCATCAACGATCTCGACGCTGGTGCTGGTCGTATGGGTGGTACCACACAGTACACTGTCAACAACCAGATGGTTAACGCAACGCTCATGAACATTGCTGATAACCCCACCAACGTCCAGCTCCCAGGAATGTACAACAAGGAAGACAACGCACGTGTCCCCATCATCGTCACCGGTAACGATTTCTCCACCCTCTACGCTCCTCTCATCCGTGAT…	912	2	AT2G39730.1	RCA (RUBISCO ACTIVASE)	Rubisco activase, a nuclear-encoded chloroplast protein that consists of two isoforms arising from alternative splicing in most plants. Required for the light activation of rubisco.	Identical to Ribulose bisphosphate carboxylase/oxygenase activase, chloroplast precursor (RCA) [Arabidopsis Thaliana] (GB:P10896;GB:Q39197;GB:Q39198;GB:Q940T8); similar to ribulose bisphosphate carboxylase/oxygenase activase, putative / RuBisCO activase,	91.86	295	24	1	1	885	165	451	8e-151	529
All.Contig_1401	GAACKACTCTTAACCGTTCGCTAAAACCCTCGAGCTCATCGCCWATCTTCGCTTCTAGATCTACTCGAAACCATGGCCACTATCACCGTCGTTARGGCTAGGCAGATCTTCGACAGYCGTGGCAACCCCACCGTYGAGGTYGATGTMCACACATCAAATGGTGTCAAGGTYACWGCTGCTGTTCCGAGTGGAGCTTCYACTGGTATCTACGAGGCTCTTGAGCTTAGGGATGGTGGRTCTGAYTATCTCGGAAAGGGTGTYTCTAAGGCTGTTGGYAATGTGAACAACATCATCGGCCCAGCGTTGATTGGAAAGGACCCGACTCAGCAGACTGCTATTGACAACTTCATGGTCCATGAACTTGATGGAACYCAGAACGAGTGGGGTTGGTGCAAGCAA…	1662	12	AT2G36530.1	LOS2 (Low expression of osmotically responsive genes 1); phosphopyruvate hydratase	Involved in light-dependent cold tolerance and encodes an enolase.	Identical to Enolase (ENO) [Arabidopsis Thaliana] (GB:P25696); similar to enolase, putative [Arabidopsis thaliana] (TAIR:AT1G74030.1); similar to LOS2 [Capsella bursa-pastoris] (GB:AAS66001.1); similar to los [Brassica rapa subsp. chinensis] (GB:ABD92697	96.62	444	15	0	73	1404	1	444	0	860
All.Contig_1402	CGACTTCAACGAACCGGCAAAAATCGAAACTGTAACTGAACTGAAGTCTTCTGAGTTTATGTTCTCTGACTTCGATCGACTCATTGACTTCGAGTACCCAAACACGTTCGGAGCAGACAGCCTCGTACCGGTTCAGACAAAAACAGAGCCTCTTCCTGTAACTAACAACGACCACTGCTTCGACATAGACTTCTGCAGATCAAAGCTCTCGACTTTCACCTACCCAACTCAATCAATCAGCCATAGTGTCTCGACTTCGTCTCTCGAATACGGCGTCGTTCCCGACGGGACCACCTCCGTCCCGTTTAACCGGAGCACGATCACTACCTCGACGGGGACTACCGGCGAGCAACCGAGCTCCATGGACAGGGAGGCTCGGGTTCTGAGGTACAGAGAGAA…	831	4	AT5G57660.1	zinc finger (B-box type) family protein		Identical to Zinc finger protein CONSTANS-LIKE 5 (COL5) [Arabidopsis Thaliana] (GB:Q9FHH8;GB:Q8L9H4;GB:Q93ZC8); similar to zinc finger (B-box type) family protein [Arabidopsis thaliana] (TAIR:AT5G24930.1); similar to unnamed protein product [Vitis vinifer	80.2	202	29	3	2	574	154	355	2e-75	278
All.Contig_1403	GGTTTCCTCTTCTCATATCACCTTCCAGCTTCCGATTCCTCTCTCTTTCTCTCTTCTCTGCCGTTTACCACAAGTATACAGAGGCTGGAGCTGGGGAAGAAAAGGATTGTCTATGGAGGGAGACGGCGCAAAAGGTTTGGCATGCCAGAAGACTATGGATGGGAAGGCGAGTAACGGGAATAAGGCTGTTCCTTCTTGTTGCCTCAAGGCTATGTCTTGCTTACCTGAGGAAGATGCTAAGTGCCACTCCACTGTTGTTTCTGGATGGTTCTCCGAGCCTCACTCTCGCTCTGGGAAGAAAGGTGAAGCGGTCTATTTCAACAACCCTATGTGGCCAGGTGAAGCACACTCACTGAAAGTTGAGAAAGTTCTGTTCAAGGACAAGTCAGACTATCAGGA…	1353	2	AT5G53120.5	SPDS3 (SPERMIDINE SYNTHASE 3)	encodes a novel spermine synthase and is a paralog of previously characterized spermidine synthases, SPDS1 and SPDS2. SPDS3 forms heterodimers with SDPS2, which in turn forms heterodimers with SDPS1 in vivo. The gene does not complement speDelta3 deficien	similar to SPDS1 (SPERMIDINE SYNTHASE 1) [Arabidopsis thaliana] (TAIR:AT1G23820.1); similar to spermine synthase [Malus sylvestris] (GB:BAE19758.1); contains InterPro domain Spermine synthase; (InterPro:IPR001045)	91.78	353	25	2	113	1159	1	353	6e-180	627
All.Contig_1404	GGAAGCGAATCRSGAAGACGAGKGAGAAGAGAAGAAGCAATGGGGAGAAAGAAGGGATTGCCGGAGTTCGAAGAGACGGCGCCGGATGGCTTCGATCCGGCGAATCCTTACAAGGATCCGGTGGCGATGATGGAAATGAGAGAGCACATCGTCCGTGAGAAGTGGATCCAGATCGAGAAGGCGAAGATCATGCGCGAGAAGGTCAAATGGTGTTACCGCGTCGAAGGAGTCAACCATTACCAGAAATGGCCGTCATCTCGTCCAGCAGTACCTCGACTCCACTCGCGGCGTCGGATGGGGGAAAGACCACCGTCCTATGTCGCTCCACGGTCCTAAGCCTGAGGCCGTTGAAGCTGAATAATGATTAATCTGAGGTGACAGAGCTTTTAATACAAGACA…	585	4	AT3G18410.2	NADH-ubiquinone oxidoreductase-related		Identical to NADH dehydrogenase [ubiquinone] iron-sulfur protein 6 [Arabidopsis Thaliana] (GB:Q9M9B4); similar to NADH-ubiquinone oxidoreductase-related [Arabidopsis thaliana] (TAIR:AT1G49140.1); similar to unknown [Populus trichocarpa] (GB:ABK93904.1)	97.22	36	1	0	251	358	71	106	1e-52	79.7
All.Contig_1405	CGATCCCATCTGTGCCCTACAGGCTATGATGGAAGGACTTCAAGTTTTGACCCTTGAGGATGTYGTYTCYGAAGCTGACAYCTTTGTMACCACCACCGGTAACAAAGACATCATCATGGTTGACCACATGAGGAAGATGAAGAACAACGCTATCGTCTGCAACATTGGTCACTTTGACAACGAGATTGACATGCAAGGACTTGAGACCTTCCCTGGAGTGAAGCGTATCACCATCAAGCCCCAGACCGACAGGTGGGTGTTCCCAGACACCAAGTCCGGAATCATTGTTTTGGCCGAGGGTCGTCTCATGAACTTGGGTTGTGCCACTGGTCACCCAAGTTTCGTCATGTCTTGCTCTTTCACCAACCAGGTGATTGCCCAGCTTGAGCTTTGGAACGA…	851	5	AT4G13940.3	HOG1 (HOMOLOGY-DEPENDENT GENE SILENCING 1); adenosylhomocysteinase	Encodes a S-adenosyl-L-homocysteine hydrolase required for DNA methylation-dependent gene silencing.	Identical to Adenosylhomocysteinase 1 (SAHH1) [Arabidopsis Thaliana] (GB:O23255;GB:O81847;GB:Q8LE20); similar to SAHH2 (S-ADENOSYL-L-HOMOCYSTEINE (SAH) HYDROLASE 2), adenosylhomocysteinase [Arabidopsis thaliana] (TAIR:AT3G23810.1); similar to unknown [Po	94.27	192	11	0	2	577	249	440	3e-93	338
All.Contig_1406	CAAGTTCTTCGCCGCAAAAGGATACCCGCCGCCGCCGGAGAAATCAGACGAACAGCTTTACCTCCTCAACACGCAGAATCTCATCGACGGCCACACGAAATGGGCTATCAACAACGTCTCATTATCCGTTACGGCGACGCCGTACATCGGAGCCATCAGATACGGGTTGAACACGCTTAGCTACTTAAAATCTCCGGCAAAGGAGCTGGTGAAGAGCTACGACATCACGAAACCGCCGGTGAATCCCACCACGACGAAGAGCAGCGGGATATACAAGTTCCCGATGGGGATCGTGGTGGACGTGATTCTCCAAAACGCCAACGTTTTGAAAGGTAAGATAAGCGAGATCCATCCGTGGCATTTGCACGGTCATGACTTTTGGGTTTTGGGTTACGGCGA…	831	4	AT5G21100.1	L-ascorbate oxidase, putative		similar to L-ascorbate oxidase/ copper ion binding [Arabidopsis thaliana] (TAIR:AT5G21105.1); similar to ascorbate oxidase [Brassica juncea] (GB:AAF20933.1); similar to ascorbate oxidase [Brassica juncea] (GB:AAF20931.1); similar to ascorbate oxidase [Bra	80.09	226	44	1	2	676	347	572	2e-110	395
All.Contig_1407	GAGTGGTTAATTAAACTACTGTTAGATACATTGGCATAGTCACAAATCTTGAGTCGATGCTTGATCGCCATGCCCACCATTTGCTTCCGTCTTCTTAAGAGAATAGAAAAACCTAAATCCCATAATATATATTATATATATATTATTCCTTGTTTCTTGATTTTCTTGATAATAGAGTTTGACGTTTCTGTCTTCCCAGTCTAGAGTGTGACAATGTGATCAAACCCTTTAAGGGGATCATAATCTCGAGAGATTACCAATTGAGAGTTAAATCAGTCTCTCTCGAGATTGAGTTCTATCTAAACATGGAGATGAGTGATTGAAAGACGGCTTCATCACAAGGGATAGTGAGACCCATCTCGTGCTCAAATCCAAACTCTTCCTCAGCTAGTTGGAGGA…	1525	2	AT2G19630.1	F-box family protein		Identical to Putative F-box protein At2g19630 [Arabidopsis Thaliana] (GB:Q9ZUN0); similar to F-box family protein [Arabidopsis thaliana] (TAIR:AT1G31080.1); contains InterPro domain F-box associated type 3 (InterPro:IPR013187); contains InterPro domain Cy	40	40	16	2	1144	1239	115	154	1.1	32
All.Contig_1408	TCATTGCCTTAGTCCTCCTTTGCCGCATCAMCATTTGCAACATCYTTCTTCTCCGCGGTTTCTTCCGTTTTCTCTTCTATGCTTCTAGAAGTTTCACCGTGGGCAACCTCGGCGGAAGCTTCTTCTACAGTGTTGGTAGAAGGTTCTGCACTTTCTTTGCCATCTCCATCATTCTTCTGAATGGTCCCGACTTTGACATACTTGCTCATGAACTTGTACTCCCAGTCTTGCAACGCATCTAGCTCAAATGGACCAAGACCAGAGATGTCTCCGGTCAAATCGGTTTCCTCAAAGGACATCTTAGCAAGAGCTCGGCTTGCATCTTTCCCTGCAAACAGAGCGTATGGTCCACCTGGTCCATAGAACATCCTGCTCTGGGAAACATCGTAGATCTGGCCT…	1789	12	AT5G21090.1	leucine-rich repeat protein, putative		similar to leucine-rich repeat family protein [Arabidopsis thaliana] (TAIR:AT3G43740.1); similar to leucine-rich repeat protein [x Citrofortunella mitis] (GB:AAP23944.1); contains InterPro domain Leucine-rich repeat, N-terminal (InterPro:IPR013210); conta	86.45	214	29	0	857	1498	4	217	2e-104	377
All.Contig_1409	GGGGGGGAGAAGAATCGAAGATGGGAGATTCGAGGTCATTTGCGGATGGATTCAAGGGGTTCTGGGAGGAGAGGTTGTCGTTCCTGGAGAATTACACGAGGTTCACCAAACGCGATGCGCCTCTTCCTTCTTGGTCTTCCTCCGACGTCGAGGAGTTTATAGCTTCCGATCCCGTTCATGGACCCACCCTGAAAACAGCTAGGGAAGCTGCGACTTTTGGTGTTACTGGAGCTGCACTTGGAGCTCTATCTACTGCTGCTTTTGCCTGGAGATACTCCTAAGAGTCCACACGGTGCTGCATTGTCCTTCTTAGGAGGCGGTGTTTTTGGTTGGACCTTTGGGCAAGAAGTTGCGAACCACACCTTGCAGCTCTATAAGCTGGACACAATGGCTGCTCAA…	688	5	AT1G08480.1			similar to unknown [Populus trichocarpa] (GB:ABK92625.1)	96.15	52	2	0	280	435	91	142	3e-56	111
All.Contig_141	GATCGCTAAAGCGGACTCAGGAGGGAAGAGAGGGGGAGCCTAAGAGTAGTTCCCGCCGCCATGGCCGTTACGGCGTCTGGATTCATCGGCAAATCAGCAATCTCCGTTCGTCTAGATTTCTACTGTAAACCTGCCAAATTCGCATACTCGAAACGTCCCTTCTCTGCGTCAAAGCCTCTGGTGGTGGTTCGTTCCGTGGCCTTATCTCCGCCGGCGAGGACAGTTGAGTCGCCGCCGGTTGGTTACCGGAAAAACGTTGGCATTTGTCTCGTTAGTCCGTGTAGAAAGATATTTACTGCATCGAAGATTCACGTTCCGGATACGTGGCAGATGCCTCAGGGTGGTGCTGATGAGGGAGAAGATCTTAGAAATGCTGCTTTTAGAGAGCTGAGAGAAGAA…	649	2	AT5G06340.1	diadenosine 5',5'''-P1,P4-tetraphosphate hydrolase, putative		similar to diadenosine 5',5'''-P1,P4-tetraphosphate hydrolase, putative [Arabidopsis thaliana] (TAIR:AT3G10620.1); similar to bis(5'-nucleosy1)-tetraphosphatase [Brassica rapa] (GB:ABL97947.1); contains InterPro domain NUDIX hydrolase, core; (InterPro:IPR	89.85	197	19	2	61	648	1	196	2e-98	354
All.Contig_1410	GACAGCACATAAAAGCACCAAAAGAAGAAGAAACAAAAATTACAACTATTTTAAATCAAAGAGAAGTAAGAGAATAAATGGCAGGTTCTAACTGTGGATGTGGTTCCGCTTGCAAATGTGGTGTCTCTTGCAGGTAAACCCTAGTTTCTATATCTTCTTTGCTGCCTTTACATCATTAGATGCATATATACATGTGATTTCTCAATTAGTCACTTTTCATCATATTAGTTATCAAAATCTCAAACCCTTTTAAAAAAAATTTGTGGTGAAGTTGCGAGAAGAACTACAACACGGAGTGCGACAACTGCAGCTGCGGGTCAAACTGTAGCTGTGGAGACAACTGCAGCTGTTGAAGGAAAACCACATGCATGCAGGAAAACCGAGGGGAAATATGTGTTT…	639	2	AT1G07610.1	MT1C (metallothionein 1C)	one of the five metallothioneins (MTs) genes identified in Arabidopsis. MTs are cysteine-rich proteins required for heavy metal tolerance.	Identical to Metallothionein-like protein 1C (MT1C) [Arabidopsis Thaliana] (GB:Q38804); contains InterPro domain Plant metallothionein, family 15; (InterPro:IPR000347); contains InterPro domain Mollusc metallothionein, family 2; (InterPro:IPR001008)	88.89	18	2	0	78	131	1	18	0.0002	42.7
All.Contig_1411	GCTCTCTTCTCTCGCCTAACACTTACCACACACTTTCACGCCTTTCATCATCCTCCGTTCTCTTCCCAAACTTCTTTTTTCTTCTCAGTTAAATTTTTTTTTTCTGTTCTCTTTTCAAATTAAATCTATGTTCTAGCTGGTATCACCATAGCTCTCTGCCAATAGAAGTTGTACAGTTAAGCTTAAGGTAAAAACAAATTTTCGTTTAATTTTTTGGATCGATCAAAAAAAAAGAAAAGAAAACGATGAATCACTGGGCGGTTCAACCAAACGCTTTCGCTGCTGGTGGAGATCTGAGGAACTCCGTGTCAGTGGTGGGAAGAGACCAAACTGTTGTCGTTTGTCCAAAACCACGTCGTATTGGTCTCCGTAACCCTCTCCACCATCCATCTCGGTCTC…	1148	2	AT1G68490.1			similar to unknown protein [Arabidopsis thaliana] (TAIR:AT1G13390.2); similar to unknown protein [Arabidopsis thaliana] (TAIR:AT1G13390.1); similar to unknown [Paeonia suffruticosa] (GB:ABW74476.1)	82.61	184	24	6	246	773	1	183	3e-70	262
All.Contig_1412	GACCAGAATCTTCTCTGACTCATCACATTCACTTCAATTCCCTAGAAAAAAAAATGTCGGCAGAGGCAGAGAACATCCCCACCAACGTCGCCTCAGGTGCTGCAGAGGGAGCTAAAGCGAAGAAGACGAAGGAAGCTAAACCTAAGAAGAAGCCTGCTGCAGAGAAGAAGAAGGCTCCGAAGAAGAAAACTTCTTCTTCTCCTCCATCTCACCCTAAATACGAAGATATGATTAAAGACGCGATCACGACGTTGAAGGAGAGGACCGGATCTAGCCAATACGCGATTCAGAAGTTCATCGAGGAGAAGGAGAAGTCTCTTCCTCCTACCTTCAGGAAGCTTCTTCTCGTTAACCTCAAGAGACTCGTCGCTGCTGAGAAGTTGGTTAAGGTGAAAGGAT…	798	4	AT2G30620.1	histone H1.2		Identical to Histone H1.2 [Arabidopsis Thaliana] (GB:P26569); similar to histone H1, putative [Arabidopsis thaliana] (TAIR:AT1G06760.1); similar to histone 1 [Malus x domestica] (GB:BAD00018.1); contains InterPro domain Winged helix repressor DNA-binding	90.77	65	6	0	210	404	62	126	2e-18	89.4
All.Contig_1413	GAGAAATAAAACAAAGGAGATCGGTCTGGGAGAAAGAAGCAAAGAAGAAAAATGGCAGCAACATTTGCAGCTCCATCGACAGTGATAGGTCTCGGAGGATCATCTGTTTCTCCCATCAAGGCCAAAGCTCTCTCTTCATCCTTTTTGAAACCAACATTAAGAGCAAAGAACCCTCTGAAAGTCGCCGGAGCATCAGGAGGAAGATTCACTTGCTTTGAGAGGAACTGGCTGAGGAGAGATCTGAACGTGGTGGGGTTCGGGCTTGTCGGATGGCTAGCTCCGTCTAGCATTCCGGCGATAAACGGGAAGAGCCTGACGGGTCTCTTCTTTGAGAGCATAGGAACTGAGCTCGCTCACTTCCCAACTCCTCCAGCTCTCACGTCACAGTTCTGGTTGTGG…	687	5	AT1G08380.1	PSAO (photosystem I subunit O)	Encodes subunit O of photosystem I.	similar to putative 16kDa membrane protein [Nicotiana tabacum] (GB:CAB75430.1)	88.11	143	17	1	52	480	1	140	1e-71	266
All.Contig_1414	GGSGGAGATCGATSGAGGARAAGAAGAAGAAGAAGAAGAAGRAGRGTGAAAATGGCGAAACCGTTGGGAACTACGGGAGAGTTTTTCAGGAGAAGGGATGAGTGGAGGAAGCACCCGATGCTTTCTAACCAGATGAGACACGCGCTCCCTGGTCTCGGGATCGGTGTTGGAGCCTTCTGCGTTTACCTCGTGGGAGAGCAGATCTATAGCAAACTCATGGCTCCTTCTCCATCTTCGCATCAGAAACAACCAGCTCCGTCTCACTGAGCGATTGTTTCGATCATGATGRAACCGCAGCAGATAAAGAGCTGAGGGATTCAGAATTGTGCTTTTTTTTCTTGGTTTATCTCAATAAGATGTTGATGAAAGACAAAACTTGTATGACATTCTGCAATGTGG…	570	10	AT2G02510.1			similar to unknown protein [Arabidopsis thaliana] (TAIR:AT1G14450.1); similar to unknown [Populus trichocarpa] (GB:ABK94107.1)	95.83	72	2	1	52	264	1	72	3e-35	144
All.Contig_1415	GGGAGTCACAAAGTTCTTGAAGCCCTCAGTTGCTGGTTTCCTTCTTCAAAAGGAGCTTGATTACCTTGTGGGAGCTGTTTCAAACCCAAAGAGACCGTTTGCAGCCATCGTGGGTGGTTCCAAGGTCTCSTCCAAGATTGGAGTTATTGARTCKCTTCTYGAGAAGTGTGAYATYCTTCTCCTTGGTGGTGGAATGATCTTTACGTTCTACAAGGCGCAAGGTCTCTCCGTTGGCTCGTCACTTGTTGAAGAAGATAAACTTGAGTTGGCTACGTCTCTCCTCGCCAAAGCTAAGGCTAAGGGAGTCTCTCTTTTGCTGCCGACCGATGTTGTGGTTGCTGATAAGTTCGCTCCTGATGCCAACAGCAAGGTTGTGCCTGCATCAGGCATTGAGGACGG…	880	5	AT3G12780.1	PGK1 (PHOSPHOGLYCERATE KINASE 1); phosphoglycerate kinase	nuclear phosphoglycerate kinase (PGK1)	similar to phosphoglycerate kinase, putative [Arabidopsis thaliana] (TAIR:AT1G56190.2); similar to phosphoglycerate kinase, putative [Arabidopsis thaliana] (TAIR:AT1G56190.1); similar to chloroplast phosphoglycerate kinase [Populus nigra] (GB:BAA33803.1);	98.37	245	4	0	2	736	237	481	7e-115	410
All.Contig_1416	CAGAAACCCCCAGAACCCAACAACCCGAATACCGGCTTTATCCCCCGTTTATCCCCCCCGATAAAGGNNNNGACCCCATTTTAAAGAAACCCCCCCCTTCCCCTTTTAAAGTACCCTTTATCCAAATTTTTCGTCCCCCCTTTCGGGACATTTCCCGGGAAATTGGCCCTTTAGGCCGGGGAGAGACTAAAAGGCTACATCCCAAAGGATTACGTCATAAAGATAGCTAACAACGGGAGATCTCTGCTGCGTCAACTATAAAGGATATGTTTTTATCTCGTATCGATTGAAAGAGCTAATCACATACAAAACTCACCAGGTTCCTTAATCTGAACCAGAAGGCTCGTTGCTCTCTGCATCGTGAAATGGTTGATGCCACAGTGATTCGATTTTCAGACA…	826	2	AT1G20510.1	OPCL1 (OPC-8:0 COA LIGASE1); 4-coumarate-CoA ligase		Identical to 4-coumarate--CoA ligase-like 5 (4CLL5) [Arabidopsis Thaliana] (GB:Q84P21;GB:Q9C5H2;GB:Q9LMV8); similar to 4-coumarate--CoA ligase family protein / 4-coumaroyl-CoA synthase family protein [Arabidopsis thaliana] (TAIR:AT1G20480.1); similar to	73.17	82	22	0	357	602	463	544	1e-34	116
All.Contig_1417	GTCTCCTTTCTTCTTCTTCCTCATCTCTCTCTCTTCTACAAAAGAAAAATCCCCAAATTCGAAGAAACCCTAGTTCTCTACCGATAGATCGTAATCGAATTCGGGAGGTGTAGAGGCAACCGATCGACATGGGTAACACAGATAAGCTGATGAATCAGATATTCGATCTGAAATTCACGTCCAAGTCTCTTCAGCGGCAGTCAAGGAAGTGCGAGAAGGAGGAGAAGGCGGAGAAGCTCAAGGTGAAGAAGGCGATCGAGAAGGGGAACATGGATGGTGCTCGGATCTACGCCGAGAACGCCATTCGCAAACGCAGCGAGCAGATGAACTACCTCCGCCTCGCTTCTCGCCTCGACGCCGTTGTTGCCCGCTTAGACACTCAGGCCAAGATGGCCACTA…	957	4	AT1G73030.1	VPS46.2		similar to VPS46.1 [Arabidopsis thaliana] (TAIR:AT1G17730.1); similar to putative developmental protein [Nicotiana benthamiana] (GB:AAO59435.1); contains InterPro domain Snf7; (InterPro:IPR005024)	97.54	203	5	0	129	737	1	203	9e-93	337
All.Contig_1418	GAAATAAAAARGATGCAAAGCCGTTTCTTCTTCTTCATCATTGTTATCTCTCTCTCCCCCATCTTCRTTTCCTCCCTGATCGCTACTTTCTGCAACGAAGACATGGCCATGCTCGGAGGCGTTCGCGATGTACCTGCTAACCAGAACAGTGGTGAGGTCGAGAGCCTCGCTCGTTTCGCTGTCGATGAACACAACAAGAAAGAGAATGCACTGCTAGAGTTCGCGAGAGTGGTGAAGGCGAAAGAGCAAGTTGTGGCGGGAACGATGCACCACCTGACTCTGGAGATCATCGAGGCTGGGAAGAAGAAGCTTTACGAGGCTAAAGTGTGGGTGAAGCCTTGGTTGAACTTCAAGGAGTTGCAGGAGTTCAAGCCCGCTAGTGATGATGGTGCCTCTTCT…	837	4	AT3G12490.2	cysteine protease inhibitor, putative / cystatin, putative		Identical to Cysteine proteinase inhibitor 6 precursor (CYS6) [Arabidopsis Thaliana] (GB:Q8H0X6;GB:Q8VZA2;GB:Q9FUB0;GB:Q9LHF9); similar to cysteine protease inhibitor, putative / cystatin, putative [Arabidopsis thaliana] (TAIR:AT5G05110.1); similar to At	87.26	212	27	2	88	723	29	234	1e-89	326
All.Contig_1419	GGGAATCTGCTACGAGACTCTCCTTCTCTCCGGAAAGAAAAGAAACGACATTTCGAGAAAAATCTCAGKGATTAGCAAAGATGTCTTCGGCTCGTTATGCGATCGCACGGCTAGGTCTGGCTCGATCCTTAGGGGAGAGTCAGGTTGGTGCATCTCGCTCTGTTGGATCGGTTCGTTGCTTCAGCGACGACAAAGGTCGTGTGCTTAGCGATGAGGAACGTGCCAAAGAGACCATTTACATCCAGAAAATGGAGAAGGAGATACTTGAGAGGAAGAAGAAACTCGAGCAACAGAAGACAGATARTGAGAAAGGAAGTGCAGGAAAGAAGCCAGAGGATAAGAAGCCATGAGTTCATYATCGGCGTTAACATGTGGTCACAAGGCAAGCAAAAAAAATGA…	608	5	AT5G04750.1	F1F0-ATPase inhibitor protein, putative			71.28	94	22	1	81	347	1	94	2e-19	92.4
All.Contig_142	GACAACACTTCCAGAGAAAGGGAGAGAGAGAATAGGAAAGAAGATAAATCAGAGRATGGCGACGGCGATTGTACGTTCAGCACTTTCCCGAGCAGCGATCGGCGCAGCTCCGAAGACATCCCTTGCCCCCAAGCGAAGATTTTCATCTTCCGCCGGCCATGACGATGCTTATGAAGCTGCRAAGTGGGAGAAGATTACTTACCTGGGCATTGCTAGTTGCACTGCTTTAGCCGCCTATGTTTTATCTAAGGGTCATCATCACGGCGAGGAYCCTCCTGCGTATCCGTATATGCACATCCGCAACAAGGAGTTTCCTTGGGGTCCWGACGGTCTCTTTGAGGTGAAGCACAACGAAGGGCACTGAAAGCTGCTCACTGCTGAATCTTTCTGAATGAGAGA…	587	10	AT4G37830.1	cytochrome c oxidase-related		similar to unknown [Populus trichocarpa] (GB:ABK95790.1); contains InterPro domain Cytochrome c oxidase, subunit VIa; (InterPro:IPR001349)	91.18	102	9	0	56	361	1	102	2e-51	198
All.Contig_1420	ACATGCGTCATTTTTTTTAAAGAAATTAATAARRAGAGAGTCCGCCGCACACTCTTTAACTTCTCAATCCCCAAATCTTCGAAGATAGATTCAGATCGGAAACGTAAGAAAGACTCTGTCTCTTCGACAGATCGACCGTCGGAGGAGAAACCGAAGGACAAGAGAGACGATCACCACAGCAACAAGCACCGTAAGAAGAGCAAGATGTCGTCGAGAGACCAAGTCAAGGCGTCGCACATTCTGATCAAGCATCAGGGATCTCGCAGGAAGGCGTCGTGGAAGGATCCCGAAGGAAAAGTCATTATGACCACCACGAGAGAAGCAGCCGTCGAGCAGCTTAAATCGATCCGTGAAGACATCGTCTCCGGGAAAGCTAACTTCGAGGATGTGGCGGCTCGT…	786	4	AT2G18040.1	PIN1AT (parvulin 1At)	phosphorylation-specific peptidyl prolyl cis/trans isomerase (PPIase) with specificity for phosphoserine-proline bonds	Identical to Peptidyl-prolyl cis-trans isomerase 1 (PIN1) [Arabidopsis Thaliana] (GB:Q9SL42;GB:Q42334); similar to peptidyl-prolyl cis-trans isomerase PPIC-type family protein [Arabidopsis thaliana] (TAIR:AT1G26550.1); similar to parvulin-type peptidyl-p	94.12	119	7	0	205	561	1	119	2e-59	225
All.Contig_1421	GAAGAGACAAACAAATACACAAAAACCGAATAGTGCAGCTATGGCTCCGAGTGTGCAAGGCGAGTGGATCAAGGTCGAGCAGAAAGGAGGACAGACACCAGGACCGAGAAGCTCACATGGCATAGCCGTGGTCGGAGACAAGCTCTACTCGTTTGGTGGCGAGTTAACTCCCAACATTTCCATCGACAAGGACCTTTACGTCTTTGACTTCAACACTCACACTTGGTCAATCGCTCCGTCCAAGGGAGTAGCCCCTGACGTCAAGGCCTTGGGCACCCGCATGGTGTCCGTGGGAACTAAGCTCTATCTATTCGGAGGCCGCGACGAGAATAAAAAGTTCGATGACTTTTACTCGTACGATACGGTGACAAATGAATGGACAAAAATTACCACTCTGGA…	774	4	AT1G54040.2	ESP (EPITHIOSPECIFIER PROTEIN)	Epithiospecifier protein, interacts with WRKY53. Involved in pathogen resistance and leaf senescence.	similar to ATMLP-470 (MYROSINASE-BINDING PROTEIN-LIKE PROTEIN-470) [Arabidopsis thaliana] (TAIR:AT3G16400.2); similar to ATMLP-470 (MYROSINASE-BINDING PROTEIN-LIKE PROTEIN-470) [Arabidopsis thaliana] (TAIR:AT3G16400.1); similar to epithiospecifier protein	78.28	244	53	1	41	772	1	241	2e-111	398
All.Contig_1422	GAGTTCACAAATTTTCTTCTCTCCTCATGGAACCGCCAAGCAAGAAACCTTTTGTAGCTACTACTACGAAGATGGAGACCGAATACGAAGATATGTTACCGATCATGGCRGAGAAAATGGACGTAGAAGAGTTTGTATCAGAGCTATGCAAAGGTTTCAGTTTGCTAGCGGATCCWGAGAGAGATCTCATCACAGCTGAGAGTCTAAGGAAGAACTCAAGGGTGCTTGGGATTGAAGGAATGAGCAAGGAAGATGCACAAGGAATGGTTAGAGAAGGAGACCTCGACGGTGATGGTGCTCTTAACCAAACCGAGTTCTGCGTTCTCATGGTTCGGTTAAGCCCTGAGATGATGGAAGATGCTGAGACATGGCTGGAGAAAGCTATCAGCCAAGAACTCA…	701	6	AT2G46600.1	calcium-binding protein, putative		similar to PBP1 (PINOID-BINDING PROTEIN 1), calcium ion binding [Arabidopsis thaliana] (TAIR:AT5G54490.1); similar to unnamed protein product [Vitis vinifera] (GB:CAO14415.1); contains InterPro domain EF-Hand type; (InterPro:IPR011992); contains InterPro	85.19	135	18	1	27	425	1	135	3e-60	228
All.Contig_1423	GACACASACCAATACTGCTACTGTAACTGCTCTTCAAGCCAAGAAAGAATAAAAAATTACGTTACGGAATCTCTTCTACAGCTGCGCGATTCGAAGCTTCAAATCGCATTTGATATGGCTGATATCAAGGATGAAGGAACCCCCAAGAGCTCTGCTTCTTCTCCTCTGAGGAATCCTAATGTTACCCTTAACGAAAGGAATTTTGCTGCCTTCACKCACAGATCAGCTGCTGCTCATCCTTGGCACGACTTGGAGATTGGTCCGGAAGCTCCTGCTGTTTTCAACTGTGTTGTTGAAATTAGCAAAGGTGGCAAGGTGAAATAYGAGCTAGACAAGAAYAGTGGCCTTATTAAGGTTGATCGTGTCCTGTACTCATCMATTGTGTACCCACACAACTAC…	1038	8	AT2G18230.1	ATPPA2 (ARABIDOPSIS THALIANA PYROPHOSPHORYLASE 2); inorganic diphosphatase/ pyrophosphatase	Encodes a protein that might have inorganic pyrophosphatase activity.	Identical to Soluble inorganic pyrophosphatase 2 (PPA2) [Arabidopsis Thaliana] (GB:P21216;GB:Q8L988;GB:Q9ZPV6); similar to ATPPA4 (ARABIDOPSIS THALIANA PYROPHOSPHORYLASE 4), inorganic diphosphatase/ pyrophosphatase [Arabidopsis thaliana] (TAIR:AT3G53620.	95.43	219	10	1	115	771	1	218	2e-118	422
All.Contig_1424	GAAATAAGAAGTCTGCGTTGATATCGAGAAATCGAGAGGCTAGGGTTTGTGATTCMAASAGCAAAAGATGATCGAGGTGGTGCTGAACGACCGTCTGGGGAAGAAAGTAAGGGTCAAGTGCAACGAAGATGACACGATCGGCGATCTGAAGAAGCTCGTGGCGGCGCAGACCGGAACGCGAGCGGAGAAGATTCGAATCCAGAAGTGGTACAACATCTACAAGGATCATATCACTCTCAAGGACTACGAGATCCACGACGGCATGGGCCTCGAGCTCTACTACAATTAAGGCGAACCGGAGGTGCTGAGCAAAGGAGAGCAAGTGAATGTTGTTGATTTGCACACCACCCCCAATTAAATAAAAAAACAAAAGTATTGTCTGTAAAATTGGCTAATTGG…	526	9	AT5G42300.1	UBL5 (UBIQUITIN-LIKE PROTEIN 5)		Identical to Ubiquitin-like protein 5 (UBL5) [Arabidopsis Thaliana] (GB:Q9FGZ9); similar to ubiquitin family protein [Arabidopsis thaliana] (TAIR:AT3G45180.1); similar to unknown [Populus trichocarpa] (GB:ABK94311.1); contains InterPro domain Ubiquitin; (	98.63	73	1	0	68	286	1	73	2e-37	151
All.Contig_1425	GGTCAACGTTTATCGTGAGATTATAAAAGAGACAACTAAGCCTAACTCTCTCKACATCAAAAGCTAATATGGCTACAAGGGAAGAGAAAGATAAGTATAGATCAGTCCTTAACGATGTAGGAGAGGTCCAATGGAGGTATGGTCACCCTCCAGCTTTTGCTCTTGTGAACCAGCTCTTTGAAGAAGGCCAGACCAAGGTATGGCCAGAAGGATCCTTGGAAGAGACGGTTCAAAACGCGATCAAGTCATGGGAGATGGAGTTCTCACACAAGATCCGTTTACAAGACTTCAAGACTATAAACCCTGATAAGTTTAAGCTATTTGTCAATGGGAGAGAAGGATTATCGGCTGAAGAAACGCTTAGGCTTGGGAGTTACAATGCTTTGCTCAAGACCTCTT…	920	4	AT1G78780.2	pathogenesis-related family protein		similar to hypothetical protein [Vitis vinifera] (GB:CAN63863.1); contains domain NTF2-like (SSF54427)	91.6	238	20	0	69	782	1	238	1e-113	406
All.Contig_1426	GGTGTTCGGCTCTAACACGCTSGACGASCATGGCGGTCTCGTTTAAYACAACCCTTCACCAGTSTTCTCTGAGTCCGMGCTGTAGCATCAAGCTTTAYTCTGGSTYRAAGCCTCAATCTKCAAGCTTTTTGACAAATGGGTATCAGAATCTGAATAAGGAGTTCTAYGGCAGGATCCACAAGAGTTTGSARTCMGGGACKGGGAAAGCGARTAGGTCRAGGGTGAAGATGATGCCWATAGGWACACCGAGAGTGCCWTACAGAAACCGAGARGAAGGMACTTGGCAATGGGTTGATATATGGAAYGCCCTTTATCGAGAGCGTGTGATCTTCATTGGACAAAACATTGATGAAGAGTTTAGCAACCAGATACTAGCAACTATGTTGTATCTTGATACTC…	1094	5	AT1G12410.1	CLPR2 (Clp protease proteolytic subunit 2); endopeptidase Clp	Encodes a ClpP-related sequence. Though similar to ClpP proteins, this does not contains the highly conserved catalytic triad of Ser-type proteases (Ser-His-Asp). The name reflects nomenclature described in Adam et. al (2001).	Identical to ATP-dependent Clp protease proteolytic subunit-related protein 2, chloroplast precursor (CLPR2) [Arabidopsis Thaliana] (GB:Q9XJ36;GB:Q93ZD4); similar to hypothetical protein [Vitis vinifera] (GB:CAN62361.1); contains InterPro domain Peptidas	93.55	279	18	0	30	866	1	279	2e-150	528
All.Contig_1427	GACCACCCAACCAATCAAGACCTGACTACTCTTGAAGTTTCTGAAACAACAGGGCATTTTAATGGCGGCCATGAACTCGAGTGTTCTCACCTGCAGCTACGCTATCTCTGGTGCTGGCTCAGCAGAACTGAACCAGAAAGTGGGTTTGGTSAATTCATCAGTTGGTTTTGGTCAAAAGAAACAAACGCTTCCWGTGATCAAAGCAGCTCAAAGAGTYGGTGGTGATGATGTTAATGGAAGAAGATCCGCAATGGTGTTCTTAGCTGCTACACTCTTCTCCTCTGCTGCTSTWTCTGCTTCCGCTAATGCTAGCGTCTTCGATGAATACCTCGAGAAGAGCAAAGCCAACAAAGAGCTGAATGATAAGAAGAGATTGGCAACAAGTGGAGCAAACTTTGC…	734	5	AT5G64040.1	PSAN (photosystem I reaction center subunit PSI-N); calmodulin binding	Encodes the only subunit of photosystem I located entirely in the thylakoid lumen. May be involved in the interaction between plastocyanin and the photosystem I complex.	Identical to Photosystem I reaction center subunit N, chloroplast precursor (PSAN) [Arabidopsis Thaliana] (GB:P49107); similar to unknown [Populus trichocarpa x Populus deltoides] (GB:ABK96256.1); contains InterPro domain Photosystem I reaction centre su	88.95	172	15	3	62	565	1	171	7e-75	276
All.Contig_1428	GGATCAAATATCCGGCGATAATCCAACCGAGAAGACGGCCGAGAAGCTGAGCGAGACGCCGACAGGAGTTAATAGATACGCACTTCAATGTGCTATTGTCGCCTCCATCGTCTCCATCATCTTTGGTTACGATACTGATGTAATGAGTGGAGCGATGGTGTTTATAGAAGAAGAGTTGAAGACAAACGATGTTCAGATCGAAGTTCTCACCGGTATTCTCAACCTTTGTGCACTAGTCGGATCACTACTCGCCGGAAGAACGTCGGACGTGATTGGTCGGCGCTACACAATCGTCTTGGCCTCAGTACTCTTCATGTTGGGCTCAATATTAATGGGCTGGGGTCCGAGTTATCCTGTACTCCTCACTGGTCGATGCACAGCCGGACTAGGAGTTGGTTT…	809	4	AT4G36670.1	mannitol transporter, putative		Identical to Probable polyol transporter 6 (PLT6) [Arabidopsis Thaliana] (GB:Q8GXR2;GB:O23213); similar to mannitol transporter, putative [Arabidopsis thaliana] (TAIR:AT2G18480.1); similar to hypothetical protein [Vitis vinifera] (GB:CAN68316.1); contains	87.36	269	34	1	2	808	3	259	2e-131	464
All.Contig_1429	GACTCGTGTTCACCTCGTGCCCATCCAGATTCTTATCTTCCTCTCGAAAAAGGTTTTAGCGAAGATGACGAAGAACTACCCAGCTGTTAGCGAAGAGTACCAGAAGGCTATTGAGAAGTGCAAGAGGAAGCTGAGAGGCTTGATCGCTGAGAAGAACTGTGCACCAATCATGGTTCGCCTCGCATGGCACTCAGCTGGAACATTCGATTGCGCCTCGAGGACTGGTGGTCCCTTCGGAACAATGAGGTTTGACGATGAGCTAGCTCATGGAGCCAACAATGGTCTCCACATTGCTCTTAGGTTGTTGGAGCCTATCAGGGAGCAGTTCCCTACCATCTCTCATGCTGATTTCCATCAGCTTGCTGGTGTTGTGGCTGTTGAAGTCACCGGTGGACCTGA…	1025	2	AT1G07890.8	APX1 (ASCORBATE PEROXIDASE 1)	Encodes a cytosolic ascorbate peroxidase APX1. Ascorbate peroxidases are enzymes that scavenge hydrogen peroxide in plant cells. Eight types of APX have been described for Arabidopsis: three cytosolic (APX1, APX2, APX6), two chloroplastic types (stromal	Identical to L-ascorbate peroxidase 1, cytosolic (APX1) [Arabidopsis Thaliana] (GB:Q05431;GB:Q0WLU2); similar to APX2 (ASCORBATE PEROXIDASE 2), L-ascorbate peroxidase [Arabidopsis thaliana] (TAIR:AT3G09640.1); similar to APX2 (ASCORBATE PEROXIDASE 2), L-	90.4	250	24	0	65	814	1	250	6e-116	414
All.Contig_143	GATATAAGAGGCAAAGATCTCTCTTTCCGSAAGACAGAAACAAAGAAAATGGACAAGACTGATCAAAATGTTAACCGAACGGAGAGAACGGTAGAGTCGGTCCTGAGAGTCGCATCAATGGCTCTAAGTATTGCGAGTCTCGTGATCATGATCAAAAACTCTATCGCCAATGACTTTGGCTCTCYTTCTTACTCAACTCTTGGAGCTTTCAAGTATTTGGTGACTGCTAATGGAGTTTGTGCGGCATATTCTGTTCTTTCTGCTATCTTTGTAATAGCCATTCCGTGTCCTATAAGCAAGCCCAGACTCTGGACATTGTTCTTGCTTGATCAAGTGGTCACGTATGTGGTTCTAGCGGCTGGGGCTGTATCTGCAGAGACGGTATACTTAGCATATAAA…	753	17	AT3G14380.1	integral membrane family protein		Identical to UPF0497 membrane protein At3g14380 [Arabidopsis Thaliana] (GB:Q9LUL1); similar to integral membrane family protein [Arabidopsis thaliana] (TAIR:AT1G17200.1); similar to hypothetical protein [Gossypium hirsutum] (GB:CAC84114.1); contains Inter	73.03	178	40	1	49	558	1	178	2e-68	255
All.Contig_1430	AAGCTCAGCAGCTTCATGAACTGGATCCGCTTCAAAAACCTAAACAAGATCGGTACGCGCTAAGGACGTCACCACAGTGGCTAGGACCACAAATCGAAGTGATCAGAGCAGCGACCAAGATGATAGAGCGCGAGATCAACTCGGTCAACGACAACCCTCTCATCGACGTCTCCAGAAACAAAGCCTACACGGCGGTAACTTCCAAGGCACGCCTATCGGTGTCGCCATGGACAACACCCGCTTAGCCATCGCTTCCATCGGCAAACTCATGTTCGCGCAGTTCTCCGAGCTCGTGAACGACTTCTACAACAACGACTTGCCTTCAAACCTATCCGGCGGGAGAAACCCTAGTCTCGACTACGGTTTCAAAGGCGCGGAGATCGCCATGGCTTCTTACTG…	1326	6	AT3G10340.1	phenylalanine ammonia-lyase, putative		Identical to Phenylalanine ammonia-lyase 4 (PAL4) [Arabidopsis Thaliana] (GB:Q9SS45;GB:Q53ZM8); similar to PAL2 (phenylalanine ammonia-lyase 2), phenylalanine ammonia-lyase [Arabidopsis thaliana] (TAIR:AT3G53260.1); similar to PAL3 (PHENYL ALANINE AMMONI	96.72	61	2	0	3	185	325	385	0	121
All.Contig_1431	GATTGACTCACAAACCAGATCTCAATCTTCTACCTCTCTTCTCTCGAAACCAATCGCAATGGCTCGCACCAAGCAGACGGCAAGAAAATCAACCGGAGGCAAGGCACCAAGGAAGCAGCTAGCCACAAAAGCCGCAAGAAAATCAGCTCCAGCCACCGGAGGAGTGAAGAAGCCACACAGATTCAGACCAGGAACCGTTGCTCTCAGGGAGATCAGGAAGTACCAGAAGAGCACCGAGCTTCTCATCCGCAAGCTCCCGTTCCAGAGGCTAGTGAGAGAGATCGCTCAGGATTTCAAGACCGATCTCCGTTTCCAGAGCAGCGCCGTCGCCGCTCTCCAGGAAGCYGCCGAGGCKTACCTCGTYGGACTGTTTGAGGACACTAACCTCTGCGCGATCCA…	594	6	AT5G65360.1	histone H3		Identical to Histone H3.2 (HTR1) [Arabidopsis Thaliana] (GB:P59226); similar to histone H3 [Arabidopsis thaliana] (TAIR:AT5G10390.1); similar to histone H3 [Arabidopsis thaliana] (TAIR:AT5G10400.1); similar to histone H3 [Arabidopsis thaliana] (TAIR:AT3G	100	136	0	0	59	466	1	136	2e-60	228
All.Contig_1432	GTACATGGAACGGTTTCCCGACAAACATTTTGATCTGGAGACGGTTCTTCAGGCTAAGATCAGACCTATCTGTGTGGTCCCGGAGAAGTCCTTCATAGGGTTTTTCCATCCGGAGAAGGAAGAGGAAGAAGACGCGAGTCTTGACTTTCTGAGAGATGTGATGTCCTTTGATAGTATATGGGAAGAGATCATGAGACATGAGCCGGAAGAGTCGGGAAGCGAGCCTGTGATCTACATTGTGAGCTGGAATGATCATTTCTTCGTCCTCCTCGTTGACCACGATGCTTACTACATCATAGACACGCTTGGGGAGAGGCTTTACGAGGGTTGCAACCAAGCKTATGTGTTGAAGTTTGACAAAGATGCAGAGATACAGAGATTGAAACCAGAGGTTAAGGA…	994	5	AT5G04860.1			similar to unknown protein [Arabidopsis thaliana] (TAIR:AT3G11760.1); similar to unnamed protein product [Vitis vinifera] (GB:CAO39924.1); contains domain Class I glutamine amidotransferase-like (SSF52317)	70.76	277	56	6	2	757	511	782	5e-99	357
All.Contig_1433	GCATATTAAACCAAAAGCAAATAAACTCAAGGGCCACCTCTGAGAGTGAGACAATGTATTGTGTCTATGTAGCGATTGGACAGAAACGCTCGACTGTGGGACAATTAATTCAAACTCTTGAAGAAGCGAATGCTTTGGAATATTCCATTCTTGTAGCAGCCACCGCTTCGGATCCTGCTCCTCTGCAATTTTTGGCCCCATATTCCGGGTGTGCCATGGGGGAATATTTCCGCGATAATGGAATGCACGCATTAATAATCTATGATGATCTTAGTAAACAGGCGGTGGCATATCGACAAATGTCATTATTGTTACGCCGACCACCAGGCCGTGAGGCTTTCCCAGGTGATGTTTTCTATTTACATTCCCGTCTCTTAGAAAGAGCGGCTAAACGATCGG…	922	6	ATMG01190.1		ATPase subunit 1	Identical to ATP synthase subunit alpha, mitochondrial (ATPA) [Arabidopsis Thaliana] (GB:P92549;GB:Q1NZ05;GB:Q8S890); similar to ATP synthase alpha chain, mitochondrial, putative [Arabidopsis thaliana] (TAIR:AT2G07698.1); similar to ATP synthase subunit a	98.69	306	4	0	3	920	185	490	3e-167	584
All.Contig_1434	GATTCGTCTCTTACAAATCATCTCTATACATTGATCATTTCGTATTCTCATAAACCTAGAAAACCAAACTCTTTTTAATAGCCATGGCAGAGGAAACCAAGAACGTTCACGAGCATGAGGTGCCAAAGGTAGCCACCGAGGAATCATCAACGGCCACCGGCGAGGTTACAGACCGTGGACTGTTCGATTTCTTGGGGAAGAAGAAAGATGAGACGAAACCAGAGGAGACCATCGACTCTGAGTTCGAGCAAARGGTTCACATCTCAGAGCCGGTGCCTGAGGTTAAACACGAGGAAGAAAAAGAAGAGAAGAAGCATAGTCTCCTCGAGAAGCTTCACCGTAGCGACAGCTCTTCTAGCTCCTCAAGCGAGGAAGAAGGTGAAGATGGTGTGAAGAAGA…	800	2	AT1G76180.1	ERD14 (EARLY RESPONSE TO DEHYDRATION 14)	Encodes a dehydrin protein whose expression is induced early on in response to dehydration stress. This gene's expression to cold occurs in two waves, with early induction occurring within 1 h and secondary induction occurring 5 h after the beginning of c	Identical to Dehydrin ERD14 (ERD14) [Arabidopsis Thaliana] (GB:P42763); similar to ERD10/LTI45 (EARLY RESPONSIVE TO DEHYDRATION 10) [Arabidopsis thaliana] (TAIR:AT1G20450.1); similar to ERD10/LTI45 (EARLY RESPONSIVE TO DEHYDRATION 10) [Arabidopsis thalian	83.61	61	9	2	84	263	1	58	6e-19	91.3
All.Contig_1435	GGTCTGARATGATCAAACTGTAGTCAAACTCATCTGACGATCGATCGATCGATCATTTGGAAGAAACCATGGTGGAAGAGAAAAGTGGGAAGAAGCAAGTGATGGTGGCGATCGACGACAGCGATTGCAGCAAACACGCTCTCCGATGGACGCTCTCGTATCTCAAAGACAGCCTCGCCGATTCCGATATCATCCTCTTCACCGCGCAGCCTCAGCTCGATCTCAGCTCCGTCTACGCTTCCTCTTATGGCGCCGCTCCGATAGAGCTGATAAACTCAATGCARCAGAACTACAAAAACGCAGCGTTGAATCGGATTGAGGAAGGGACCAAGATTTGCGCTGAGAGCGGGGTTACRCCAAAGAAGGTGATGGAGTTTGGGAACCCTAAAGAAGCGATAT…	701	7	AT1G68300.1	universal stress protein (USP) family protein		similar to ethylene-responsive protein, putative [Arabidopsis thaliana] (TAIR:AT1G09740.1); similar to unnamed protein product [Vitis vinifera] (GB:CAO42154.1); contains InterPro domain UspA; (InterPro:IPR006016); contains InterPro domain Universal stress	84.08	157	25	0	75	545	4	160	2e-73	272
All.Contig_1436	GGACCCATTTCTTGGCACATAGCAACAACTAATAAACGTTTTTACTTTACTCCGCACTCAACCGCAATGGCTGCCTCGACAATGGCTCTCTCCTCCTCTGCCTTCGCCGGAAAGGCCGTGAAACTTTCTCCAGCGGCATCAGAAGTCCTCGGAAGTGGCCGTGTGACAATGAGGAAGACCGTGGCCAAGCCAAAGGGACCATCAGGCAGCCCATGGTACGGAGCCGAGAGAGTCAAGTACTTGGGTCCATTCTCCGGCGAGCCACCGAGCTACCTTACTGGAGAGTTCCCAGGAGACTACGGGTGGGACACAGCCGGTCTCTCAGCCGATCCCGAGACATTCGCAAGGAACCGTGAGCTAGARGTTATCCACTGCAGGTGGGCCATGCTCGGAGCCCTA…	905	4	AT1G29930.1	CAB1 (CHLOROPHYLL A/B BINDING PROTEIN 1); chlorophyll binding	Subunit of light-harvesting complex II (LHCII),which absorbs light and transfers energy to the photosynthetic reaction center.	Identical to Chlorophyll a-b binding protein 2, chloroplast precursor (CAB2B) [Arabidopsis Thaliana] (GB:P04778;GB:P83754); similar to CAB2 (Chlorophyll a/b-binding protein 2), chlorophyll binding [Arabidopsis thaliana] (TAIR:AT1G29920.1); similar to CAB	98.62	145	2	0	434	868	123	267	2e-141	295
All.Contig_1437	GGAAATCGTTTTTTTTTTTTGGTAAAATCTCGAAATCGTTTKGTCTATCATCTCTCTCACAACAAAACAGACCTTCTCATCATCTATCATCAYYTWGATTCAATGGCSGATCGTATTAAAGGTCCATGGAGTCCCGAAGAGGACGAGCAGCTTCGCAAGCTCGTGGTTAMATACGGTCCGAGGAATTGGACGGTGATTAGCAAATCCATTCCCGGTAGATCGGGAAAATCGTGTCGGTTACGGTGGTGCAACCAGCTWTCGCCGCAGGTTGAGCACCGSCCGTTCTCGGCGGAGGAAGACGAGACGATCGCGCGCGCACACGCGCAGTTTGGTAATAAGTGGGCGACGATTGCTCGTCTTCTCAACGGTCGTACGGACAACGCGGTGAAGAAYCACTGG…	1226	4	AT5G67300.1	ATMYB44/ATMYBR1/MYBR1 (MYB DOMAIN PROTEIN 44); DNA binding / transcription factor	Member of the R2R3 factor gene family.	similar to MYB77, DNA binding / transcription factor [Arabidopsis thaliana] (TAIR:AT3G50060.1); similar to putative R2R3-Myb transcription factor [Citrus sinensis] (GB:ABQ10819.1); similar to putative R2R3-Myb transcription factor [Citrus sinensis] (GB:AB	79.2	250	45	2	103	831	1	250	9e-114	372
All.Contig_1438	GAAGTAAGTGGATCAATAAAGTAACCGAACTCAAAAGAAAATTCATTATTTATGGTCCAAGACCATACATTTTGATGAATGCAACTTAGAAAAATTTGTTGAATAGATAGATAGAGCGAAAAGATCATAACTATACTTAACAAAAAAATACTCAGAAACGTCCACATACGTCGAAGGTTTTTTGTTGCTGTCGGAAAAAGTAGAAGTCCAGCTCCGAGTAAAATAGGTACTGGAAGTGGAATGAAAGGGATGATCCATGAATATTGATATGTATGTTCCATAAAATAAAAAACCCTTTTTATTTTATTCTTAAATTTATTATTTCTTATTCACTGGTTTGTATATATATATATTTTTTTTCAAAGGGGATAATAAAAAAGCGCATTTTTTCAAACTTAA…	1538	45	ATCG01020.1		encodes a chloroplast ribosomal protein L32, a constituent of the large subunit of the ribosomal complex	Identical to Chloroplast 50S ribosomal protein L32 (rpl32) [Arabidopsis Thaliana] (GB:P61847;GB:P42354); similar to ribosomal protein L32 [Capsella bursa-pastoris] (GB:YP_001123423.1); similar to ribosomal protein L32 [Arabis hirsuta] (GB:YP_001123248.1);	100	52	0	0	1085	1240	1	52	6e-10	62.8
All.Contig_1439	AGCTCGTGGTGGTAGAAGCCGACGGCAATTACATTACGCCGTTCACAACCGACGACATCGATATCTATTCCGGCGAGACCTACTCCGTCCTTCTCACCACTGATCAAGACCMTTCCCAGAACTACTACATCWCCRCCGGCGTCCGCGGCCGGAAACCAAACACACCTCCRGCACTCACCGTTCTAAACTACGTAACCGCCCCTTCTTCTCAGCTCCCTACGTCTCCGCCGCCGGAGACTCCGCGATGGAACGATTTCGATCGGAGCAAAAACTTCTCGAAGAAGATCTTCGCAGCGATGGGATCACCATCGCCACCGGAGACATTCGACGAACGGTTGATCCTCCTCAACACTCAGAATCTCATCGAAGGATTCACGAAATGGGCGATCAACAACGTCT…	1231	8	no significant hit
All.Contig_144	GGAGGTGGAGGGTCCATAGTCTCTCATTTTCCATATAAATAGAGAATCATGAGCTCCTCGTKATCTGAGTATCTCTCTCAAAGCCAAATAAACATTTTAGATTTTTTCTTCAGTTTCTTAGAGAAGATGTCTTGCTGTGGAGGAAACTGTAGCTGCGGATCTGACTGCAAGTGTGATGGCTGCAAAGGTTGCAAGATGTACCCAGACTTGGGCTTCTCAGGGGAGACTACCACCACCCAGACTCTTGTCCTCGGCGTTGCTCCGTCGATGAACTCTCAGTATGAGGCTTCTGGCGAGACTTTCTTCGCCGAGAATGATGGATGCAAGTGCGGATCTGACTGCAAGTGCGACAACCCTTGCACTTGTAAATGAACAACCCCAATAAACCCAAACCCCAAG…	676	22	AT3G09390.1	MT2A (METALLOTHIONEIN 2A)	metallothionein, binds to and detoxifies excess copper and other metals, limiting oxidative damage	Identical to Metallothionein-like protein 2A (MT2A) [Arabidopsis Thaliana] (GB:P25860;GB:P43391); similar to MT2B (METALLOTHIONEIN 2B) [Arabidopsis thaliana] (TAIR:AT5G02380.1); similar to metallothionein-like protein [Brassica rapa] (GB:BAA11391.1); sim	63.79	58	21	1	196	369	25	81	1e-13	73.2
All.Contig_1440	GGTTATATATATTACTATATATATTGTAATACAATAAAGAAGAAAGAAGGAGGATTTCAAATGCGAGATCTAAAAACATATCTTTCCGTAGCACCGGTACTAAGTACTCTATGGTTCGTTTCGTTAGCAGGTTTATTAATAGAGATTAATCGTTTATTTCCAGATGCATTAACATTTCCCTTTTTTTAATTCTAGTTATTAACATCAAG	210	4	ATCG00630.1		Encodes subunit J of photosystem I.	Identical to Photosystem I reaction center subunit IX (psaJ) [Arabidopsis Thaliana] (GB:P56769); similar to photosystem I subunit IX [Eucalyptus globulus subsp. globulus] (GB:YP_636318.1); contains InterPro domain Photosystem I reaction centre, subunit I	96.77	31	1	0	61	153	1	31	2e-10	60.5
All.Contig_1441	GGGGAAACAACGCCGAGCGTGTCCTTGACATGCTCCGTCTTCTTTTAGACCTTCTTGAGGCCCCTGACCCTTGCACTCTCGAGACCTTTCTCGGAAGAATCCCAATGGTGTTCAACGTTGTGATCCTCTCTCCACATGGCTACTTTGCTCAGGACAATGTCCTTGGTTACCCTGACACTGGTGGTCAGGTTGTTTACATTCTGGATCAAGTCCGTGCCTTGGAGACAGAGATGCTGCAACGTATTAAGCAGCAAGGACTCAACATTACTCCAAGAATCCTCATTCTCACTAGACTTCTCCCTGATGCGGTGGGAACCACATGTGGTGAGCGTCTTGAGAGAGTTGATGGATCCGAGTACTGTGATATTCTCCGTGTGCCTTTCAGAACAGAGAAGGGTA…	1970	16	AT5G20830.2	SUS1 (SUCROSE SYNTHASE 1); UDP-glycosyltransferase/ sucrose synthase	Encodes a protein with sucrose synthase activity (SUS1).	Identical to Sucrose synthase 1 (SUS1) [Arabidopsis Thaliana] (GB:P49040); similar to SUS2 (SUCROSE SYNTHASE 2), UDP-glycosyltransferase/ sucrose synthase/ transferase, transferring glycosyl groups [Arabidopsis thaliana] (TAIR:AT5G49190.1); similar to SU	96.11	565	22	0	3	1697	243	807	0	1066
All.Contig_1442	GGGCACGGACAAACAATGAGCCCCATGCGTTTCTTCAAGTTGATGCTCATAGTCTTGGTAGAGTTCCTTTCCCTTCAATCCGCAGGCCTCGTCCCCTTCTTGAAGTGGATCCTCCAAATTCAACCAAGTCTGGCAATGCAGAGCACAGGGCTACCGATAAGCCCCTTGATGAGGAACCCTTGCTCGCAGCTAGAGTGTACATTGAGGATGGTCATAATCTTCTCCTTGATGTTGACGACATAGATCGTTTCTTAGAGCTTACCCAACTCCACGATGGAGGAATCCAGTTGAAACAGAAACGGCAAGCTTTGTTGGAAACCCTTGCGGTTTCACTGCAGCTCGTTGATCCCCTTGCCAAGAATGGGCAAAGCCGGTCCCAGGATGATTTAATCTTTCAAA…	1212	4	AT1G79090.2			similar to unknown protein [Arabidopsis thaliana] (TAIR:AT3G22270.1); similar to unnamed protein product [Vitis vinifera] (GB:CAO23830.1); contains domain PTHR21551 (PTHR21551)	84.77	348	53	2	3	1046	449	792	3e-165	578
All.Contig_1443	GGAGTTGTTGGGCGTTTTCAACCATCGGAGCAGTGGAGGGCATAAACAAGATCGTGACAGGAGACTTAATATCCTTGTCTGAACAAGAATTGGTTGATTGTGACACTTCATACAATGAAGGTTGTAACGGAGGTCTCATGGACTATGCTTTTGAGTTCATTATAAAAAACGATGGAATTTGTGGAACAGATCTAGACCAYGGAGTTGTGGCGGTCGGATACGGAACAGAGAATGGCAAAGACTATTGGATTGTGAAAAACTCATGGGGAACAAGTTGGGGAGAGAGCGGATACATAAGGATGGAGCGCAACATTGCGTCTTCRGCAGGAAAATGTGGAATCGCTGTTGAGCCTTCTTATCCGATCAAGAATGGCCAAAACCCACCAAACCCTGGACCTT…	958	6	AT1G47128.1	RD21 (RESPONSIVE TO DEHYDRATION 21); cysteine-type peptidase	cysteine proteinase precursor-like protein/ dehydration stress-responsive gene (RD21)	Identical to Cysteine proteinase RD21a precursor (RD21A) [Arabidopsis Thaliana] (GB:P43297); similar to cysteine proteinase, putative / thiol protease, putative [Arabidopsis thaliana] (TAIR:AT5G43060.1); similar to unknown [Populus trichocarpa] (GB:ABK95	89.71	175	18	0	171	695	288	462	1e-87	320
All.Contig_1444	TATCACTTGGCGCTGATACACTCCCAGTTCTCAAAGGTAGAACACCCGTGCAATGCTATTCCGATTTCATGCGTGCTTTCAGAGACAACTTCAAGCATCTTCTTGGAGACACCATTGTGGAAATCCAAGTGGGAATGGGACCAGCAGGAGAGCTGCGTTACCCTTCATACCCCGAGCAAGACGGGACATGGAGGTTCCCAGGGATTGGAGCCTTCCAGTGCTATGACAAGTACTCATTAAGCAGCTTGAAAGCAGCAGCTGAAGCTTATGGGAAGCCAGAGTGGGGTGGTACTGGCCCAACCGATGCTGGTCACTACAATAACTGGCCAGAAGACACTCAGTTCTTCAAAAAAGAAGACGGTGGTTGGAACACAGAATATGGAGAGTTCTTCCTCACAT…	1334	7	AT3G23920.1	BAM1/BMY7/TR-BAMY (BETA-AMYLASE 1); beta-amylase		similar to CT-BMY (BETA-AMYLASE 3, BETA-AMYLASE 8), beta-amylase [Arabidopsis thaliana] (TAIR:AT4G17090.1); similar to hypothetical protein [Vitis vinifera] (GB:CAN71375.1); similar to putative chloroplast-targeted beta-amylase [Brassica napus] (GB:AAL371	93.93	346	21	0	3	1040	230	575	0	690
[truncated: 5,360 more rows]

## Sheet: Contig assembly information
Raw Sequence ID	EST CLONE ID	All Contig ID
[truncated: 11,101 more rows]
