# Supplementary material for: Identification of Differential Gene Expression in Brassica rapa Nectaries through Expressed Sequence Tag Analysis
Source: PLoS One. 2010 Jan 20;5(1):e8782. doi: 10.1371/journal.pone.0008782 (PMC2808342; doi:10.1371/journal.pone.0008782)
Supplement: Table S8 — Summarized blastx hits for contigs and singletons, with Arabidopsis ortholog microarray expression data. First tab: number of B. rapa ESTs within contigs generating hits against Arabidopsis loci for each cDNA library. Loci highlighted in yellow (n = 460) were not found to be significantly expressed in Arabidopsis nectaries previously (Kram et al., BMC Plant Biol, 2009). Eighteen mitochondrial (green) and 36 plastidial (gray) encoded orthologs not represented in the ATH1 array are also highlighted. All non-highlighted genes (n = 3,678, or 89% of the 4,138 unigenes) were confidently expressed in Arabidopsis nectaries. Column M contains the expression ratios of AtMLN vs AtMMN derived from Arabidopsis microarray experiments, with column N showing the t-test significance between AtMLN vs AtMMN expression values (data from Kram et al., BMC Plant Biol, 2009). Second tab: Genes upregulated in MMN by EST hit number. All genes showing a 2-fold or greater number of EST hits in MMN (minimum of 5 ESTs required) than MLN are displayed. Genes highlighted in pink displayed 1.5 fold or greater expression in Arabidopsis MMN over MLN, with t-test p-values <0.1, as determined by microarray. Third tab: Genes upregulated in MLN by EST hit number. All genes showing a 2-fold or greater number of EST hits in MLN (minimum of 5 ESTs required) over MMN are displayed. None of these genes displayed 1.5 fold or greater expression in Arabidopsis MLN over MMN, with a t-test p-value <0.1, as determined by microarray. (2.56 MB XLS) [file pone.0008782.s008.xls]

## Sheet: Supplemental Table 8 revised
Arabidopsis locus	Locus type	Short description	Curator notes	Description	MLN1 hit #	MMN1 hit #	MLN1/MMN1	MLN2 hit #	MMN2 hit #	MLN2/MMN2	All MLN hit #	All MMN hit #	All MLN/All MMN	AtMLN/AtMMN	T-TEST P-value for AtMLN vs AtMMN
AT1G01470	protein_coding	LEA14 (LATE EMBRYOGENESIS ABUNDANT 14)	Encodes late-embryogenesis abundant protein whose mRNA levels are induced in response to wounding and light stress. Might be involved in protection against dessication.	Identical to Putative desiccation-related protein LEA14 (LEA14) [Arabidopsis Thaliana] (GB:O03983;GB:Q42314); similar to late embryogenesis abundant protein, putative / LEA protein, putative [Arabidopsis thaliana] (TAIR:AT2G46140.1); similar to Late embry	0	0	#DIV/0!	0	1	0	0	1	0	0.0626326	0.227242
AT1G01500	protein_coding			similar to unknown protein [Arabidopsis thaliana] (TAIR:AT1G19400.1); similar to unknown protein [Arabidopsis thaliana] (TAIR:AT1G19400.2); similar to unknown [Picea sitchensis] (GB:ABK24253.1); contains domain PTHR10996:SF1 (PTHR10996:SF1); contains doma	0	1	0	0	1	0	0	2	0	0.88354	0.591537
AT1G01540	protein_coding	protein kinase family protein		Identical to Putative serine/threonine-protein kinase At1g01540 [Arabidopsis Thaliana] (GB:Q3EDL4;GB:O23699;GB:Q94KD9;GB:Q9LMM7); similar to protein kinase family protein [Arabidopsis thaliana] (TAIR:AT4G01330.1); similar to unnamed protein product [Viti	0	1	0	0	0	#DIV/0!	0	1	0	0.731381	0.0319559
AT1G01710	protein_coding	acyl-CoA thioesterase family protein		similar to acyl-CoA thioesterase family protein [Arabidopsis thaliana] (TAIR:AT4G00520.2); similar to unnamed protein product [Vitis vinifera] (GB:CAO39602.1); contains InterPro domain RmlC-like jelly roll fold (InterPro:IPR014710); contains InterPro doma	0	0	#DIV/0!	0	1	0	0	1	0	0.833553	0.270571
AT1G01750	protein_coding	actin-depolymerizing factor, putative		Identical to Actin-depolymerizing factor 10 (ADF10) [Arabidopsis Thaliana] (GB:Q9LQ81); similar to actin-depolymerizing factor, putative [Arabidopsis thaliana] (TAIR:AT4G00680.1); similar to hypothetical protein [Vitis vinifera] (GB:CAN73839.1); contains	0	1	0	0	0	#DIV/0!	0	1	0	0.733861	0.218322
AT1G01790	protein_coding	KEA1 (K EFFLUX ANTIPORTER 1); potassium:hydrogen antiporter	K efflux antiporter KEA1	similar to KEA2 (K+ efflux antiporter), potassium:hydrogen antiporter [Arabidopsis thaliana] (TAIR:AT4G00630.1); similar to hypothetical protein OsJ_015941 [Oryza sativa (japonica cultivar-group)] (GB:EAZ32458.1); similar to H0124B04.17 [Oryza sativa (ind	0	1	0	0	1	0	0	3	0	1.11508	0.293997
AT1G02070	protein_coding			similar to zinc ion binding [Arabidopsis thaliana] (TAIR:AT3G60520.1); similar to unknown [Populus trichocarpa] (GB:ABK95332.1)	0	1	0	0	0	#DIV/0!	0	1	0	0.811432	0.178415
AT1G02100	protein_coding	leucine carboxyl methyltransferase family protein		similar to hypothetical protein [Vitis vinifera] (GB:CAN69755.1); contains InterPro domain Leucine carboxyl methyltransferase (InterPro:IPR007213); contains InterPro domain Leucine carboxyl methyltransferase, subgroup (InterPro:IPR016651)	0	1	0	0	0	#DIV/0!	0	1	0	1.08185	0.709915
AT1G02120	protein_coding	VAD1 (VASCULAR ASSOCIATED DEATH1)		similar to C2 domain-containing protein / GRAM domain-containing protein [Arabidopsis thaliana] (TAIR:AT3G59660.1); similar to unnamed protein product [Vitis vinifera] (GB:CAO70534.1); contains InterPro domain GRAM (InterPro:IPR004182)	0	1	0	0	0	#DIV/0!	0	1	0	1.00031	0.998931
AT1G02205	protein_coding	CER1 (ECERIFERUM 1)	Expression of the CER1 gene associated with production of stem epicuticular wax and pollen fertility. Biochemical studies showed that cer1 mutants are blocked in the conversion of stem wax C30 aldehydes to C29 alkanes, and they also lack the secondary alc	similar to CER1 protein, putative [Arabidopsis thaliana] (TAIR:AT1G02190.1); similar to unnamed protein product [Vitis vinifera] (GB:CAO17291.1); contains InterPro domain Sterol desaturase; (InterPro:IPR006088)	0	0	#DIV/0!	0	2	0	0	2	0	0.530819	0.122591
AT1G02270	protein_coding	endonuclease/exonuclease/phosphatase family protein / calcium-binding EF hand family protein		Identical to Uncharacterized calcium-binding protein At1g02270 [Arabidopsis Thaliana] (GB:O81916;GB:Q940T7); similar to calcium-binding EF hand family protein [Arabidopsis thaliana] (TAIR:AT5G54130.2); similar to unnamed protein product [Vitis vinifera] (	0	0	#DIV/0!	0	1	0	0	1	0	1.09131	0.591353
AT1G02290	protein_coding			similar to unknown protein [Arabidopsis thaliana] (TAIR:AT3G45830.1); similar to hypothetical protein [Vitis vinifera] (GB:CAN67827.1)	0	1	0	0	0	#DIV/0!	0	1	0
AT1G02305	protein_coding	cathepsin B-like cysteine protease, putative		similar to cathepsin B-like cysteine protease, putative [Arabidopsis thaliana] (TAIR:AT1G02300.1); similar to Peptidase C1A, papain; Somatotropin hormone; Peptidase C1, propeptide [Medicago truncatula] (GB:ABD32840.1); contains InterPro domain Peptidase C	0	1	0	0	1	0	0	2	0	1.0365	0.855835
AT1G02330	protein_coding			similar to unnamed protein product [Vitis vinifera] (GB:CAO40200.1); contains InterPro domain Hepatocellular carcinoma-associated antigen 59 (InterPro:IPR010756)	0	0	#DIV/0!	0	1	0	0	1	0	0.94649	0.581773
AT1G02410	protein_coding	cytochrome c oxidase assembly protein CtaG / Cox11 family		similar to unnamed protein product [Vitis vinifera] (GB:CAO62202.1); contains InterPro domain Cytochrome c oxidase assembly protein CtaG/Cox11; (InterPro:IPR007533)	0	0	#DIV/0!	0	1	0	0	1	0	0.842523	0.215204
AT1G02620	protein_coding	GTP-binding protein (SAR1A)		similar to ASAR1 (Arabidopsis thaliana secretion-associated RAS super family 2), GTP binding [Arabidopsis thaliana] (TAIR:AT4G02080.1); similar to GTP-binding protein SAR1A (GB:O04266); contains InterPro domain ARF/SAR superfamily; (InterPro:IPR006689); c	0	1	0	0	0	#DIV/0!	0	1	0	0.983181	0.799677
AT1G02640	protein_coding	BXL2 (BETA-XYLOSIDASE 2); hydrolase, hydrolyzing O-glycosyl compounds	encodes a protein similar to a beta-xylosidase located in the extracellular matrix. This is a member of glycosyl hydrolase family 3 and has six other closely related members.	similar to XYL4 (beta-xylosidase 4), hydrolase, hydrolyzing O-glycosyl compounds [Arabidopsis thaliana] (TAIR:AT5G64570.1); similar to BXL1 (BETA-XYLOSIDASE 1), hydrolase, hydrolyzing O-glycosyl compounds [Arabidopsis thaliana] (TAIR:AT5G49360.1); similar	0	0	#DIV/0!	0	1	0	0	1	0	1.06251	0.679716
AT1G02770	protein_coding			similar to unknown protein [Arabidopsis thaliana] (TAIR:AT1G19060.1); contains InterPro domain Protein of unknown function DUF626, Arabidopsis thaliana (InterPro:IPR006462)	0	0	#DIV/0!	0	1	0	0	1	0
AT1G02990	protein_coding			similar to zinc ion binding [Arabidopsis thaliana] (TAIR:AT3G62900.1); similar to unnamed protein product [Vitis vinifera] (GB:CAO22392.1)	0	0	#DIV/0!	0	1	0	0	1	0
AT1G03090	protein_coding	MCCA (3-methylcrotonyl-CoA carboxylase 1)	MCCA is the biotinylated subunit of the dimer MCCase, which is involved in leucine degradation. Both subunits are nuclear coded and the active enzyme is located in the mitochondrion.	Identical to Methylcrotonoyl-CoA carboxylase subunit alpha, mitochondrial precursor (MCCA) [Arabidopsis Thaliana] (GB:Q42523;GB:Q9SA61); similar to CAC2 (acetyl co-enzyme A carboxylase biotin carboxylase subunit) [Arabidopsis thaliana] (TAIR:AT5G35360.1)	0	0	#DIV/0!	0	1	0	0	1	0	0.741478	0.316382
AT1G03210	protein_coding	phenazine biosynthesis PhzC/PhzF family protein		similar to catalytic [Arabidopsis thaliana] (TAIR:AT4G02860.1); similar to unnamed protein product [Vitis vinifera] (GB:CAO22510.1); contains InterPro domain Phenazine biosynthesis PhzC/PhzF protein; (InterPro:IPR003719)	0	0	#DIV/0!	0	1	0	0	1	0	1.2557	0.0692009
AT1G03250	protein_coding			similar to unknown [Populus trichocarpa] (GB:ABK96006.1); contains domain R3H domain (SSF82708)	0	1	0	0	0	#DIV/0!	0	1	0	0.958329	0.698436
AT1G03350	protein_coding	BSD domain-containing protein		similar to BSD domain-containing protein [Arabidopsis thaliana] (TAIR:AT4G13110.1); similar to unnamed protein product [Vitis vinifera] (GB:CAO22467.1); contains InterPro domain BSD (InterPro:IPR005607)	0	0	#DIV/0!	0	1	0	0	1	0	0.937798	0.705109
AT1G03475	protein_coding	LIN2 (LESION INITIATION 2); coproporphyrinogen oxidase	Encodes a protein (AtCPO-I) with coproporphyrinogen III oxidase activity.	Identical to Coproporphyrinogen III oxidase, chloroplast precursor (CPX) [Arabidopsis Thaliana] (GB:Q9LR75;GB:Q546I5;GB:Q94JR5); similar to HEMF2, coproporphyrinogen oxidase [Arabidopsis thaliana] (TAIR:AT4G03205.2); similar to Coproporphyrinogen III oxi	0	0	#DIV/0!	0	1	0	0	1	0	0.999373	0.997995
AT1G03590	protein_coding	protein phosphatase 2C family protein / PP2C family protein		similar to protein phosphatase 2C family protein / PP2C family protein [Arabidopsis thaliana] (TAIR:AT4G03415.1); similar to hypothetical protein [Vitis vinifera] (GB:CAN68594.1); contains InterPro domain Protein phosphatase 2C-related; (InterPro:IPR00193	0	0	#DIV/0!	0	1	0	0	1	0	1.19169	0.451068
AT1G03680	protein_coding	ATHM1 (Arabidopsis thioredoxin M-type 1); thiol-disulfide exchange intermediate	encodes a chloroplast thioredoxin similar to prokaryotic thioredoxins.	Identical to Thioredoxin M-type 1, chloroplast precursor [Arabidopsis Thaliana] (GB:O48737); similar to ATHM2 (Arabidopsis thioredoxin M-type 2), thiol-disulfide exchange intermediate [Arabidopsis thaliana] (TAIR:AT4G03520.1); similar to Thioredoxin M-ty	0	0	#DIV/0!	0	1	0	0	1	0
AT1G03760	protein_coding	prefoldin subunit family protein		similar to hypothetical protein OsI_004919 [Oryza sativa (indica cultivar-group)] (GB:EAY77072.1); similar to hypothetical protein OsJ_004531 [Oryza sativa (japonica cultivar-group)] (GB:EAZ14706.1); contains InterPro domain Prefoldin (InterPro:IPR009053)	0	0	#DIV/0!	0	1	0	0	1	0	0.88701	0.425063
AT1G03905	protein_coding	ABC transporter family protein		Identical to Non-intrinsic ABC protein 4 (NAP4) [Arabidopsis Thaliana] (GB:Q3EDJ0;GB:Q9ZWB0); similar to POP1 [Arabidopsis thaliana] (TAIR:AT5G44110.1); similar to unnamed protein product [Vitis vinifera] (GB:CAO40609.1); contains InterPro domain ABC tra	0	0	#DIV/0!	0	1	0	0	1	0	1.02416	0.880141
AT1G03970	protein_coding	GBF4 (G-box binding factor 4); transcription factor	encodes a basic leucine zipper G-box binding factor that can bind to G-box motifs only as heterodimers with GBF2 or GBF3. A single amino acid change can confer G-box binding as homodimers.	Identical to G-box-binding factor 4 (GBF4) [Arabidopsis Thaliana] (GB:P42777); similar to bZIP transcription factor family protein [Arabidopsis thaliana] (TAIR:AT5G44080.1); similar to unnamed protein product [Vitis vinifera] (GB:CAO43627.1); contains In	0	1	0	0	0	#DIV/0!	0	1	0	0.682093	0.132215
AT1G04260	protein_coding	MPI7 (CAMV MOVEMENT PROTEIN INTERACTING PROTEIN 7)	Encodes protein that interacts with CaMV movement protein. Colocalizes in the cytoplasm with the movement protein. Has similarity to mammalian proteins (such as the rat PRA1) which have been described as rab acceptors.	similar to prenylated rab acceptor (PRA1) family protein [Arabidopsis thaliana] (TAIR:AT1G08770.1); similar to hypothetical protein [Vitis vinifera] (GB:CAN60779.1); contains InterPro domain Prenylated rab acceptor PRA1 (InterPro:IPR004895)	0	1	0	0	0	#DIV/0!	0	1	0	1.02945	0.857319
AT1G04310	protein_coding	ERS2 (ETHYLENE RESPONSE SENSOR 2); receptor	encodes an ethylene receptor related to bacterial two-component histidine kinases.	similar to ETR2 (ETHYLENE RESPONSE 2), receptor [Arabidopsis thaliana] (TAIR:AT3G23150.1); similar to At1g04310-like protein [Arabidopsis lyrata] (GB:ABY67638.1); contains InterPro domain Histidine kinase A, N-terminal; (InterPro:IPR003661); contains Inte	0	1	0	0	0	#DIV/0!	0	1	0	1.25506	0.592828
AT1G04340	protein_coding	lesion inducing protein-related		similar to lesion inducing protein-related [Arabidopsis thaliana] (TAIR:AT5G43460.1); similar to unnamed protein product [Vitis vinifera] (GB:CAO71340.1); contains InterPro domain HR-like lesion-inducer (InterPro:IPR008637); contains InterPro domain Surfe	0	1	0	0	0	#DIV/0!	0	1	0	1.00349	0.958942
AT1G74820	protein_coding	cupin family protein		Identical to Germin-like protein subfamily T member 3 precursor [Arabidopsis Thaliana] (GB:Q9S772;GB:Q1PFD3); similar to germin-like protein, putative [Arabidopsis thaliana] (TAIR:AT1G18980.1); similar to germin-like protein [Ananas comosus] (GB:AAM28275.	1	244	0.00409836	4	75	0.0533333	5	319	0.015674	0.0152806	2.44448e-07
AT1G04750	protein_coding	VAMP7B (VESICLE-ASSOCIATED MEMBRANE PROTEIN 7B)	vesicle-associated membrane protein 7B (At VAMP7B) mRNA,	Identical to Vesicle-associated membrane protein 721 (VAMP721) [Arabidopsis Thaliana] (GB:Q9ZTW3;GB:O23011;GB:Q9MAS4); similar to SAR1 (SYNAPTOBREVIN-RELATED PROTEIN 1) [Arabidopsis thaliana] (TAIR:AT2G33120.1); similar to unnamed protein product [Vitis	0	1	0	0	0	#DIV/0!	0	1	0	0.879729	0.285535
AT1G05120	protein_coding	SNF2 domain-containing protein / helicase domain-containing protein / RING finger domain-containing protein		similar to DNA repair protein, putative [Arabidopsis thaliana] (TAIR:AT1G02670.1); similar to putative DNA repair protein rhp16 [Oryza sativa (japonica cultivar-group)] (GB:BAD31171.1); similar to unnamed protein product [Vitis vinifera] (GB:CAO24011.1);	0	1	0	0	0	#DIV/0!	0	1	0	1.06478	0.37394
AT1G05170	protein_coding	galactosyltransferase family protein		similar to galactosyltransferase family protein [Arabidopsis thaliana] (TAIR:AT2G32430.1); similar to unnamed protein product [Vitis vinifera] (GB:CAO23998.1); contains InterPro domain Glycosyl transferase, family 31; (InterPro:IPR002659)	0	0	#DIV/0!	0	1	0	0	1	0	1.04742	0.71685
AT1G05180	protein_coding	AXR1 (AUXIN RESISTANT 1); small protein activating enzyme	Encodes a subunit of the RUB1 activating enzyme that regulates the protein degradation activity of Skp1-Cullin-Fbox complexes, primarily, but not exclusively, affecting auxin responses. Acts alongside AS1 to exclude BP expression from leaves.	Identical to NEDD8-activating enzyme E1 regulatory subunit (AXR1) [Arabidopsis Thaliana] (GB:P42744); similar to AXL (AXR1-LIKE), catalytic [Arabidopsis thaliana] (TAIR:AT2G32410.1); similar to AXL (AXR1-LIKE), catalytic [Arabidopsis thaliana] (TAIR:AT2G	0	0	#DIV/0!	0	1	0	0	1	0	1.10627	0.413858
AT1G05430	protein_coding			similar to unnamed protein product [Vitis vinifera] (GB:CAO71187.1)	0	0	#DIV/0!	0	1	0	0	1	0	1.04556	0.563769
AT1G05540	protein_coding			similar to unknown protein [Arabidopsis thaliana] (TAIR:AT1G30160.2); contains InterPro domain Protein of unknown function DUF295 (InterPro:IPR005174)	0	0	#DIV/0!	0	1	0	0	1	0	1.13307	0.541532
AT1G05570	protein_coding	CALS1 (CALLOSE SYNTHASE 1); transferase, transferring glycosyl groups	Encodes a callose synthase 1 catalytic subunit . Member of Glycosyltransferase Family- 48.	similar to ATGSL03 (GLUCAN SYNTHASE-LIKE 3), 1,3-beta-glucan synthase/ transferase, transferring glycosyl groups [Arabidopsis thaliana] (TAIR:AT2G31960.1); similar to ATGSL12 (GLUCAN SYNTHASE-LIKE 12), 1,3-beta-glucan synthase/ transferase, transferring g	0	0	#DIV/0!	0	1	0	0	1	0	0.930734	0.682992
AT1G05790	protein_coding	lipase class 3 family protein		similar to lipase class 3 family protein [Arabidopsis thaliana] (TAIR:AT2G42450.1); similar to OJ991113_30.24 [Oryza sativa (japonica cultivar-group)] (GB:CAD41339.2); contains InterPro domain Lipase, active site; (InterPro:IPR008262); contains InterPro d	0	1	0	0	0	#DIV/0!	0	1	0	1.14329	0.286421
AT1G05800	protein_coding	lipase class 3 family protein		similar to lipase class 3 family protein [Arabidopsis thaliana] (TAIR:AT2G31690.1); similar to unnamed protein product [Vitis vinifera] (GB:CAO45320.1); contains InterPro domain Lipase, class 3; (InterPro:IPR002921)	0	1	0	0	0	#DIV/0!	0	1	0	0.918733	0.561445
AT1G05850	protein_coding	POM1 (POM-POM1); chitinase	Encodes an endo chitinase-like protein AtCTL1. Essential for tolerance to heat, salt and drought stresses. Also involved in root hair development, cell expansion and response to cytokinin. Allelic to erh2. 11 alleles described in Hauser (1995). Mutant	similar to chitinase [Arabidopsis thaliana] (TAIR:AT3G16920.1); similar to chitinase [Brassica rapa] (GB:ABV89660.1); contains InterPro domain Endochitinase (InterPro:IPR016283); contains InterPro domain Glycoside hydrolase, family 19, catalytic; (InterPr	0	0	#DIV/0!	0	2	0	0	2	0	0.772865	0.316434
AT1G05860	protein_coding			similar to unknown protein [Arabidopsis thaliana] (TAIR:AT2G31600.1); similar to unnamed protein product [Vitis vinifera] (GB:CAO64768.1)	0	0	#DIV/0!	0	1	0	0	1	0	0.908898	0.511572
AT1G05940	protein_coding	CAT9 (CATIONIC AMINO ACID TRANSPORTER 9); cationic amino acid transmembrane transporter	Encodes a member of the cationic amino acid transporter (CAT) subfamily of amino acid polyamine choline transporters.	similar to CAT4 (CATIONIC AMINO ACID TRANSPORTER 4), cationic amino acid transmembrane transporter [Arabidopsis thaliana] (TAIR:AT3G03720.1); similar to hypothetical protein [Vitis vinifera] (GB:CAN66397.1); similar to unnamed protein product [Vitis vinif	0	0	#DIV/0!	0	1	0	0	1	0	1.20941	0.447228
AT1G06070	protein_coding	bZIP transcription factor, putative (bZIP69)		similar to bZIP transcription factor (POSF21) [Arabidopsis thaliana] (TAIR:AT2G31370.5); similar to bZIP transcription factor (POSF21) [Arabidopsis thaliana] (TAIR:AT2G31370.4); similar to bZIP transcription factor (POSF21) [Arabidopsis thaliana] (TAIR:AT	0	0	#DIV/0!	0	1	0	0	1	0	1.01014	0.931958
AT1G06130	protein_coding	GLX2-4 (GLYOXALASE 2-4); hydroxyacylglutathione hydrolase		similar to GLX2-5 (GLYOXALASE 2-5), hydroxyacylglutathione hydrolase/ iron ion binding / zinc ion binding [Arabidopsis thaliana] (TAIR:AT2G31350.1); similar to unnamed protein product [Vitis vinifera] (GB:CAO16950.1); contains InterPro domain Beta-lactama	0	1	0	0	0	#DIV/0!	0	1	0	0.978887	0.946418
AT1G06200	protein_coding	serine-type peptidase/ signal peptidase		similar to serine-type peptidase/ signal peptidase [Arabidopsis thaliana] (TAIR:AT2G31140.1); similar to predicted protein [Physcomitrella patens subsp. patens] (GB:EDQ73983.1); similar to OSJNBa0068L06.9 [Oryza sativa (japonica cultivar-group)] (GB:CAE01	0	1	0	0	0	#DIV/0!	0	1	0	0.832841	0.39388
AT1G06460	protein_coding	ACD32.1 (ALPHA-CRYSTALLIN DOMAIN 31.2)	ACD32.1 encodes an alpha-crystallin domain containing protein with homology to small heat shock proteins.	similar to AT-HSP17.6A (Arabidopsis thaliana heat shock protein 17.6A) [Arabidopsis thaliana] (TAIR:AT5G12030.1); similar to peroxisomal small heat shock protein ACD31.2 [Brassica rapa] (GB:ABV89635.1); contains InterPro domain HSP20-like chaperone (Inter	0	1	0	0	0	#DIV/0!	0	1	0	0.720916	0.604753
AT1G06510	protein_coding			similar to unnamed protein product [Vitis vinifera] (GB:CAO70010.1)	0	0	#DIV/0!	0	1	0	0	1	0	1.38986	0.311657
AT1G06645	pseudogene			pseudogene, similar to CmE8, blastp match of 51% identity and 3.9e-106 P-value to GP|15721876|dbj|BAB68392.1||AB071820 CmE8 {Cucumis melo}	0	0	#DIV/0!	0	1	0	0	1	0
AT1G06900	protein_coding	metalloendopeptidase		similar to peptidase M16 family protein / insulinase family protein [Arabidopsis thaliana] (TAIR:AT2G41790.1); similar to hypothetical protein OsJ_010322 [Oryza sativa (japonica cultivar-group)] (GB:EAZ26839.1); similar to hypothetical protein OsI_011148	0	1	0	0	0	#DIV/0!	0	1	0	1.03029	0.648334
AT1G07040	protein_coding			similar to unknown protein [Arabidopsis thaliana] (TAIR:AT1G27030.1); similar to unnamed protein product [Vitis vinifera] (GB:CAO41035.1)	0	1	0	0	2	0	0	3	0	1.2566	0.666954
AT1G07080	protein_coding	gamma interferon responsive lysosomal thiol reductase family protein / GILT family protein		similar to OSH1 (OAS HIGH ACCUMULATION 1), catalytic [Arabidopsis thaliana] (TAIR:AT5G01580.1); similar to unnamed protein product [Vitis vinifera] (GB:CAO21403.1); contains InterPro domain Thioredoxin-like fold (InterPro:IPR012336); contains InterPro dom	0	2	0	0	1	0	0	3	0	1.06264	0.558596
AT1G07110	protein_coding	F2KP (FRUCTOSE-2,6-BISPHOSPHATASE); fructose-2,6-bisphosphate 2-phosphatase	Encodes the bifunctional enzyme fructose-6-phosphate 2-kinase/fructose-2,6-bisphosphatase.	similar to fructose-6-phosphate 2-kinase-related / fructose-2,6-bisphosphatase-related [Arabidopsis thaliana] (TAIR:AT3G30200.1); similar to fructose-6-phosphate 2-kinase/fructose-2,6-bisphosphatase [Bruguiera gymnorrhiza] (GB:BAB55655.1); similar to unna	0	0	#DIV/0!	0	1	0	0	1	0	0.94062	0.533286
AT1G07200	protein_coding	ATP-dependent Clp protease ClpB protein-related		similar to heat shock protein-related [Arabidopsis thaliana] (TAIR:AT2G29970.1); similar to unnamed protein product [Vitis vinifera] (GB:CAO21445.1); contains domain SSF52540 (SSF52540); contains domain G3DSA:3.40.50.300 (G3DSA:3.40.50.300); contains doma	0	0	#DIV/0!	0	1	0	0	1	0
AT1G07280	protein_coding	binding		similar to binding [Arabidopsis thaliana] (TAIR:AT2G29670.1); similar to unnamed protein product [Vitis vinifera] (GB:CAO21490.1); contains InterPro domain Tetratricopeptide-like helical; (InterPro:IPR011990); contains InterPro domain Tetratricopeptide re	0	1	0	0	0	#DIV/0!	0	1	0	0.766605	0.576401
AT1G07480	protein_coding	transcription factor IIA large subunit / TFIIA large subunit (TFIIA-L)		similar to transcription factor IIA large subunit, putative / TFIIA large subunit, putative [Arabidopsis thaliana] (TAIR:AT1G07470.1); similar to unnamed protein product [Vitis vinifera] (GB:CAO21604.1); contains InterPro domain Transcription factor IIA,	0	1	0	0	0	#DIV/0!	0	1	0
AT1G07600	protein_coding	MT1A (METALLOTHIONEIN 1A)	metallothionein, binds to and detoxifies excess copper and other metals, limiting oxidative damage.	Identical to Metallothionein-like protein 1A (MT1A) [Arabidopsis Thaliana] (GB:P43392); contains InterPro domain Mollusc metallothionein, family 2; (InterPro:IPR001008)	0	1	0	0	0	#DIV/0!	0	1	0	0.924899	0.053554
AT1G08110	protein_coding	lactoylglutathione lyase, putative / glyoxalase I, putative		Identical to Lactoylglutathione lyase [Arabidopsis Thaliana] (GB:Q8H0V3;GB:Q9LMZ7); similar to lactoylglutathione lyase, putative / glyoxalase I, putative [Arabidopsis thaliana] (TAIR:AT1G67280.1); similar to lactoylglutathione lyase, putative / glyoxala	0	1	0	0	0	#DIV/0!	0	1	0	0.889132	0.529954
AT1G08210	protein_coding	aspartyl protease family protein		similar to aspartyl protease family protein [Arabidopsis thaliana] (TAIR:AT5G22850.1); similar to unnamed protein product [Vitis vinifera] (GB:CAO62959.1); contains InterPro domain Peptidase aspartic, catalytic; (InterPro:IPR009007); contains InterPro dom	0	0	#DIV/0!	0	1	0	0	1	0	1.01433	0.961289
AT1G08370	protein_coding	DCP1 (DECAPPING 1); m7G(5')pppN diphosphatase/ protein homodimerization	Encodes DCP1 involved in mRNA decapping. DCP1 forms a mRNA decapping complex with DCP2 (At5g13570) and VCS (VARICOSE) (At3g13300). However, unlike DCP2, DCP1 itself does not have mRNA decapping activity in vitro. DCP1, DCP2 and VCS colocalize in cytopla	Identical to mRNA-decapping enzyme-like protein [Arabidopsis Thaliana] (GB:Q9SJF3;GB:O64895); similar to unnamed protein product [Vitis vinifera] (GB:CAO15866.1); contains InterPro domain Dcp1-like decapping (InterPro:IPR010334)	0	1	0	0	1	0	0	2	0	0.898694	0.466038
AT1G08410	protein_coding	GTP-binding family protein		similar to GTP-binding family protein [Arabidopsis thaliana] (TAIR:AT2G27200.1); similar to expressed protein [Oryza sativa (japonica cultivar-group)] (GB:AAU89192.1); similar to Os12g0618300 [Oryza sativa (japonica cultivar-group)] (GB:NP_001067291.1); c	0	1	0	0	0	#DIV/0!	0	1	0
AT1G08450	protein_coding	CRT3 (CALRETICULIN 3); calcium ion binding	Encodes calreticulin CRT3.	Identical to Calreticulin-3 precursor (CRT3) [Arabidopsis Thaliana] (GB:O04153;GB:Q93ZR4;GB:Q9SJE7); similar to calreticulin 2 (CRT2) [Arabidopsis thaliana] (TAIR:AT1G09210.1); similar to calreticulin 3 [Brassica rapa subsp. pekinensis] (GB:AAQ19995.1); c	0	0	#DIV/0!	0	1	0	0	1	0	0.89554	0.565403
AT1G08630	protein_coding	THA1 (THREONINE ALDOLASE 1); aldehyde-lyase/ threonine aldolase	Encodes a threonine aldolase, involved in threonine degradation to glycine. Primarily expressed in seeds and seedlings.	similar to THA2 (THREONINE ALDOLASE 2), threonine aldolase [Arabidopsis thaliana] (TAIR:AT3G04520.1); similar to unnamed protein product [Vitis vinifera] (GB:CAO65068.1); contains InterPro domain Aromatic amino acid beta-eliminating lyase/threonine aldola	0	0	#DIV/0!	0	1	0	0	1	0	1.76122	0.221239
AT1G08640	protein_coding	heat shock protein binding		similar to unnamed protein product [Vitis vinifera] (GB:CAO65063.1); contains InterPro domain Heat shock protein DnaJ, N-terminal; (InterPro:IPR001623)	0	0	#DIV/0!	0	1	0	0	1	0	1.12384	0.568724
AT1G08660	protein_coding	glycosyl transferase family 29 protein / sialyltransferase family protein		similar to glycosyl transferase family 29 protein / sialyltransferase family protein [Arabidopsis thaliana] (TAIR:AT3G48820.1); similar to sialyltransferase-like protein [Solanum lycopersicum] (GB:CAJ15147.2); similar to unnamed protein product [Vitis vin	0	0	#DIV/0!	0	1	0	0	1	0	1.14669	0.783021
AT1G08770	protein_coding	prenylated rab acceptor (PRA1) family protein		similar to prenylated rab acceptor (PRA1) family protein [Arabidopsis thaliana] (TAIR:AT1G55190.1); similar to hypothetical protein [Vitis vinifera] (GB:CAN73850.1); contains InterPro domain Prenylated rab acceptor PRA1 (InterPro:IPR004895)	0	1	0	0	0	#DIV/0!	0	1	0	1.10718	0.587179
AT1G08820	protein_coding	VAP27-2 (VAMP/SYNAPTOBREVIN-ASSOCIATED PROTEIN 27-2); structural molecule	Encodes VAP33-like protein that interacts with cowpea mosaic virus protein 60K. Is a SNARE-like protein that may be involved in vesicular transport to or from the ER.	similar to VAP27-1 (VAMP/SYNAPTOBREVIN-ASSOCIATED PROTEIN 27-1), protein binding [Arabidopsis thaliana] (TAIR:AT3G60600.1); similar to VAP27-1 (VAMP/SYNAPTOBREVIN-ASSOCIATED PROTEIN 27-1) [Arabidopsis thaliana] (TAIR:AT3G60600.3); similar to VAP27-1 (VAMP	0	1	0	0	0	#DIV/0!	0	1	0
AT1G09040	protein_coding			similar to unknown protein [Arabidopsis thaliana] (TAIR:AT1G55050.2); similar to unknown protein [Arabidopsis thaliana] (TAIR:AT1G09050.1); similar to unknown protein [Arabidopsis thaliana] (TAIR:AT1G55050.1); similar to unnamed protein product [Vitis vin	0	0	#DIV/0!	0	1	0	0	1	0
AT1G09130	protein_coding	ATP-dependent Clp protease proteolytic subunit, putative		Identical to ATP-dependent Clp protease proteolytic subunit-related protein 3, chloroplast precursor (CLPR3) [Arabidopsis Thaliana] (GB:Q8L770;GB:O04018;GB:Q67XY5;GB:Q680D2); similar to CLPR1 (Clp protease proteolytic subunit 5), endopeptidase Clp [Arabi	0	0	#DIV/0!	0	1	0	0	1	0	1.23456	0.340961
AT1G09140	protein_coding	ATSRP30.1 (ARABIDOPSIS THALIANA SERINE/ARGININE PROTEIN 30.1); RNA binding	Encodes a serine-arginine rich RNA binding protein involved in regulation of splicing (including splicing of itself). Exists as 3 alternative spliced forms that are differentially expressed.	similar to SR1 (splicing factor 2), RNA binding [Arabidopsis thaliana] (TAIR:AT1G02840.2); similar to SR1 (splicing factor 2), RNA binding [Arabidopsis thaliana] (TAIR:AT1G02840.3); similar to SR1 (splicing factor 2), RNA binding [Arabidopsis thaliana] (T	0	0	#DIV/0!	0	1	0	0	1	0	0.768483	0.266334
AT1G09150	protein_coding	pseudouridine synthase and archaeosine transglycosylase (PUA) domain-containing protein		similar to eukaryotic translation initiation factor SUI1 family protein [Arabidopsis thaliana] (TAIR:AT1G71350.1); similar to unknown [Populus trichocarpa] (GB:ABK93433.1); contains InterPro domain Uncharacterized domain 2 (InterPro:IPR004521); contains I	0	1	0	0	0	#DIV/0!	0	1	0	1.12396	0.781317
AT1G09155	protein_coding	ATPP2-B15 (Phloem protein 2-B15); carbohydrate binding		Identical to F-box protein PP2-B15 (PP2B15) [Arabidopsis Thaliana] (GB:O80494;GB:Q8LBR0); similar to ATPP2-B13 (Phloem protein 2-B13), carbohydrate binding [Arabidopsis thaliana] (TAIR:AT1G56240.1); similar to unnamed protein product [Vitis vinifera] (GB	0	3	0	0	1	0	0	4	0	1.01814	0.858283
AT1G09210	protein_coding	calreticulin 2 (CRT2)		Identical to Calreticulin-2 precursor (CRT2) [Arabidopsis Thaliana] (GB:Q38858;GB:O04152;GB:O80486;GB:Q94AW7); similar to CRT1 (CALRETICULIN 1), calcium ion binding [Arabidopsis thaliana] (TAIR:AT1G56340.2); similar to CRT1 (CALRETICULIN 1), calcium ion b	0	0	#DIV/0!	0	1	0	0	2	0	0.58453	0.0966494
AT1G09330	protein_coding			Identical to Uncharacterized FAM18-like protein At1g09330 [Arabidopsis Thaliana] (GB:Q8LEK2;GB:Q9ZPZ2); similar to unknown [Populus trichocarpa x Populus deltoides] (GB:ABK96699.1); contains InterPro domain Protein of unknown function DUF846, eukaryotic;	0	1	0	0	1	0	0	2	0	0.877681	0.157721
AT1G09730	protein_coding	Ulp1 protease family protein		similar to Ulp1 protease family protein [Arabidopsis thaliana] (TAIR:AT4G33620.1); similar to hypothetical protein [Vitis vinifera] (GB:CAN78777.1); similar to Os05g0207900 [Oryza sativa (japonica cultivar-group)] (GB:NP_001054903.1); contains InterPro do	0	0	#DIV/0!	0	1	0	0	1	0	0.982281	0.933696
AT1G09820	protein_coding	pentatricopeptide (PPR) repeat-containing protein		similar to EMB2745 (EMBRYO DEFECTIVE 2745) [Arabidopsis thaliana] (TAIR:AT5G39710.1); similar to unnamed protein product [Vitis vinifera] (GB:CAO17433.1); contains InterPro domain Pentatricopeptide repeat (InterPro:IPR002885)	0	1	0	0	0	#DIV/0!	0	1	0	1.06004	0.721076
AT1G09940	protein_coding	HEMA2; glutamyl-tRNA reductase	Encodes glutamyl-tRNA reductase. Involved in heme biosynthesis in non-photosynthetic tissues and induced by oxidative stress in photosynthetic tissues to supply heme for defensive hemoproteins	Identical to Glutamyl-tRNA reductase 2, chloroplast precursor (HEMA2) [Arabidopsis Thaliana] (GB:P49294;GB:O04950;GB:Q0WQP1;GB:Q4V3B7); similar to HEMA3, glutamyl-tRNA reductase [Arabidopsis thaliana] (TAIR:AT2G31250.1); similar to HEMA1, glutamyl-tRNA r	0	0	#DIV/0!	0	1	0	0	1	0	1.0127	0.900374
AT1G10170	protein_coding	ATNFXL1; transcription factor	Encodes AtNFXL1, a homologue of the putative human transcription repressor NF-X1. Functions as a negative regulator of the trichothecene phytotoxin-induced defense response.	similar to transcription factor [Arabidopsis thaliana] (TAIR:AT5G05660.1); similar to putative TF-like protein [Oryza sativa (japonica cultivar-group)] (GB:BAD46154.1); similar to hypothetical protein OsJ_019987 [Oryza sativa (japonica cultivar-group)] (G	0	0	#DIV/0!	0	1	0	0	1	0	0.65987	0.045067
AT1G10500	protein_coding	ATCPISCA (CHLOROPLAST-LOCALIZED ISCA-LIKE PROTEIN); structural molecule	Involved in chloroplast Fe-S cluster assembly. Located in the chloroplast stroma. Expressed preferentially in green tissues.	Identical to Iron-sulfur assembly protein IscA, chloroplast precursor (ISCA) [Arabidopsis Thaliana] (GB:Q9XIK3;GB:Q6NM99); similar to hesB-like domain-containing protein [Arabidopsis thaliana] (TAIR:AT5G03905.1); similar to unknown [Populus trichocarpa x	0	0	#DIV/0!	0	1	0	0	1	0	0.992951	0.944
AT1G10970	protein_coding	ZIP4 (ZINC TRANSPORTER 4 PRECURSOR); cation transmembrane transporter	A member of Zrt- and Irt-related protein (ZIP) family. transcript is induced in response to zinc deficiency in the root and shoot. Expression is regulated by copper, but response to copper deficiency is detected only after three weeks of deficiency.	Identical to Zinc transporter 4, chloroplast precursor (ZIP4) [Arabidopsis Thaliana] (GB:O04089;GB:Q56XS7); similar to IRT3 (Iron regulated transporter 3), cation transmembrane transporter/ metal ion transmembrane transporter [Arabidopsis thaliana] (TAIR	0	0	#DIV/0!	0	1	0	0	1	0	0.923301	0.310073
AT1G10990	protein_coding	unknown protein			0	0	#DIV/0!	0	1	0	0	1	0	1.08012	0.0355372
AT1G11320	protein_coding			similar to unnamed protein product [Vitis vinifera] (GB:CAO60944.1)	0	1	0	0	0	#DIV/0!	0	1	0	1.02854	0.798544
AT1G11380	protein_coding			similar to unknown protein [Arabidopsis thaliana] (TAIR:AT5G05350.1); similar to Uncharacterized Cys-rich domain [Medicago truncatula] (GB:ABD32347.2); contains InterPro domain Protein of unknown function Cys-rich (InterPro:IPR006461)	0	0	#DIV/0!	0	1	0	0	1	0	1.11427	0.609042
AT1G11400	protein_coding	PYM (PARTNER OF Y14-MAGO); protein binding	The PYM gene encodes a protein capable of interacting with MAGO, and Y14, whose orthologs form part of the exon junction complex in animal cells. In vitro binding assays indicate that PYM can bind to MAGO and Y14 either individually, or when they are toge	similar to unknown [Populus trichocarpa] (GB:ABK95693.1); contains InterPro domain Exon junction complex, Pym (InterPro:IPR015362)	0	0	#DIV/0!	0	2	0	0	2	0	0.880599	0.152462
AT1G11750	protein_coding	CLPP6 (Clp protease proteolytic subunit 6); endopeptidase Clp	One of several nuclear-encoded ClpPs (caseinolytic protease). Contains a highly conserved catalytic triad of Ser-type proteases (Ser-His-Asp). The name reflects nomenclature described in Adam et. al (2001).	Identical to ATP-dependent Clp protease proteolytic subunit 6, chloroplast precursor (CLPP6) [Arabidopsis Thaliana] (GB:Q9SAA2;GB:O48891); similar to CLPP5 (NUCLEAR ENCODED CLP PROTEASE 1), endopeptidase Clp [Arabidopsis thaliana] (TAIR:AT1G02560.1); sim	0	0	#DIV/0!	0	2	0	0	2	0	0.95144	0.666655
AT1G11860	protein_coding	aminomethyltransferase, putative		Identical to Aminomethyltransferase, mitochondrial precursor (GDCST) [Arabidopsis Thaliana] (GB:O65396;GB:Q42123); similar to unknown protein [Arabidopsis thaliana] (TAIR:AT1G60990.2); similar to unknown protein [Arabidopsis thaliana] (TAIR:AT1G60990.3);	0	1	0	0	0	#DIV/0!	0	1	0	0.87782	0.535282
AT1G11880	protein_coding			similar to unnamed protein product [Vitis vinifera] (GB:CAO22037.1); contains InterPro domain Mannosyltransferase, PIG-V (InterPro:IPR007315)	0	1	0	0	0	#DIV/0!	0	1	0	1.30156	0.225449
AT1G11890	protein_coding	SEC22 (secretion 22); transporter	member of SEC22 Gene Family	Identical to 25.3 kDa vesicle transport protein (SEC22) [Arabidopsis Thaliana] (GB:Q94AU2;GB:O65393); similar to vesicle transport protein-related [Arabidopsis thaliana] (TAIR:AT5G52270.1); similar to hypothetical protein [Vitis vinifera] (GB:CAN69529.1)	0	1	0	0	0	#DIV/0!	0	1	0	0.741724	0.112715
AT1G12010	protein_coding	1-aminocyclopropane-1-carboxylate oxidase, putative / ACC oxidase, putative	encodes a protein whose sequence is similar to 1-amino-cyclopropane-1-carboxylic acid oxidase	similar to ACO2 (ACC OXIDASE 2) [Arabidopsis thaliana] (TAIR:AT1G62380.1); similar to ACC oxidase [Brassica oleracea] (GB:CAA57285.1); contains InterPro domain 2OG-Fe(II) oxygenase (InterPro:IPR005123)	0	0	#DIV/0!	0	1	0	0	1	0	0.840887	0.0622529
AT1G12200	protein_coding	flavin-containing monooxygenase family protein / FMO family protein		similar to flavin-containing monooxygenase family protein / FMO family protein [Arabidopsis thaliana] (TAIR:AT1G62580.1); similar to FMO-like protein [Thellungiella halophila] (GB:ABJ98059.1); contains InterPro domain Pyridine nucleotide-disulphide oxidor	0	1	0	0	0	#DIV/0!	0	1	0	1.16092	0.21647
AT1G12250	protein_coding	thylakoid lumenal protein-related		similar to thylakoid lumenal 15 kDa protein, chloroplast [Arabidopsis thaliana] (TAIR:AT2G44920.2); similar to unnamed protein product [Vitis vinifera] (GB:CAO70323.1); contains InterPro domain Pentapeptide repeat (InterPro:IPR001646)	0	1	0	0	1	0	0	2	0	0.774861	0.279052
AT1G12380	protein_coding			similar to unknown protein [Arabidopsis thaliana] (TAIR:AT1G62870.1); similar to unnamed protein product [Vitis vinifera] (GB:CAO49735.1); similar to hypothetical protein [Vitis vinifera] (GB:CAN79336.1); similar to unnamed protein product [Vitis vinifera	0	1	0	0	0	#DIV/0!	0	1	0
AT1G12550	protein_coding	oxidoreductase family protein		similar to oxidoreductase family protein [Arabidopsis thaliana] (TAIR:AT2G45630.2); similar to unnamed protein product [Vitis vinifera] (GB:CAO24440.1); contains InterPro domain D-isomer specific 2-hydroxyacid dehydrogenase, NAD-binding; (InterPro:IPR0061	0	1	0	0	0	#DIV/0!	0	1	0	1.3117	0.105364
AT1G12680	protein_coding	PEPKR2 (PHOSPHOENOLPYRUVATE CARBOXYLASE-RELATED KINASE 2); kinase		similar to PEPKR1 (PHOSPHOENOLPYRUVATE CARBOXYLASE-RELATED KINASE 1), kinase [Arabidopsis thaliana] (TAIR:AT1G12580.1); similar to CPK29 (calcium-dependent protein kinase 29), calmodulin-dependent protein kinase/ kinase [Arabidopsis thaliana] (TAIR:AT1G76	0	0	#DIV/0!	0	1	0	0	1	0	0.901149	0.388994
AT1G12780	protein_coding	UGE1 (UDP-D-GLUCOSE/UDP-D-GALACTOSE 4-EPIMERASE 1); UDP-glucose 4-epimerase/ protein dimerization	Encodes a UDP-glucose epimerase that catalyzes the interconversion of the sugar nucleotides UDP-glucose UDP-galactose via a UDP-4-keto-hexose intermediate. Responsive to stress.	Identical to UDP-glucose 4-epimerase [Arabidopsis Thaliana] (GB:Q42605;GB:Q9LPX1); similar to UGE3 (UDP-D-GLUCOSE/UDP-D-GALACTOSE 4-EPIMERASE 3), UDP-glucose 4-epimerase/ protein dimerization [Arabidopsis thaliana] (TAIR:AT1G63180.1); similar to unnamed	0	0	#DIV/0!	0	1	0	0	1	0	0.728307	0.112311
AT1G12790	protein_coding			similar to unnamed protein product [Vitis vinifera] (GB:CAO44590.1); contains InterPro domain RuvA domain 2-like (InterPro:IPR010994)	0	0	#DIV/0!	0	2	0	0	2	0	1.26459	0.358822
AT1G12800	protein_coding	S1 RNA-binding domain-containing protein		similar to S1 RNA-binding domain-containing protein [Arabidopsis thaliana] (TAIR:AT3G23700.1); similar to hypothetical protein [Vitis vinifera] (GB:CAN68047.1); similar to unnamed protein product [Vitis vinifera] (GB:CAO63706.1); contains InterPro domain	0	1	0	0	0	#DIV/0!	0	1	0	1.03816	0.814184
AT1G12910	protein_coding	ATAN11 (ANTHOCYANIN11); nucleotide binding	Encodes a protein with similarity to the petunia WD repeat protein an11.	similar to transducin family protein / WD-40 repeat family protein [Arabidopsis thaliana] (TAIR:AT3G26640.1); similar to WD40 repeat protein [Ipomoea purpurea] (GB:BAE94397.1); similar to WD-repeat protein GhTTG2 [Gossypium hirsutum] (GB:AAM95643.1); simi	0	0	#DIV/0!	0	1	0	0	1	0	1.01895	0.909134
AT1G13060	protein_coding	PBE1 (20S proteasome beta subunit E1); peptidase	Encodes 20S proteasome beta subunit PBE1 (PBE1).	Identical to Proteasome subunit beta type-5-A precursor (PBE1) [Arabidopsis Thaliana] (GB:O23717;GB:Q949V2); similar to 20S proteasome beta subunit E, putative [Arabidopsis thaliana] (TAIR:AT3G26340.1); similar to unnamed protein product [Vitis vinifera]	0	0	#DIV/0!	0	1	0	0	1	0	0.758815	0.466813
AT1G13120	protein_coding	EMB1745 (EMBRYO DEFECTIVE 1745)		similar to unknown protein [Arabidopsis thaliana] (TAIR:AT4G05523.1); similar to hypothetical protein [Vitis vinifera] (GB:CAN81849.1); contains InterPro domain GLE1-like; (InterPro:IPR012476)	0	0	#DIV/0!	0	1	0	0	1	0	0.92948	0.510432
AT1G13270	protein_coding	MAP1C (METHIONINE AMINOPEPTIDASE 1B); metalloexopeptidase	Encodes a methionine aminopeptidase formerly called MAP1B, renamed to MAP1C.	Identical to Methionine aminopeptidase 1B, chloroplast precursor (MAP1B) [Arabidopsis Thaliana] (GB:Q9FV52;GB:Q9FX70); similar to MAP1B (METHIONINE AMINOPEPTIDASE 1C), metalloexopeptidase [Arabidopsis thaliana] (TAIR:AT3G25740.1); similar to unnamed prot	0	1	0	0	0	#DIV/0!	0	1	0	0.843252	0.827598
AT1G13370	protein_coding	histone H3, putative		Identical to Histone H3-like 1 [Arabidopsis Thaliana] (GB:Q9FX60;GB:Q8LCA8); similar to histone H3 [Arabidopsis thaliana] (TAIR:AT5G10980.1); similar to histone H3.2 [Arabidopsis thaliana] (TAIR:AT4G40040.1); similar to histone H3.2 [Arabidopsis thaliana]	0	1	0	0	0	#DIV/0!	0	1	0	1.04251	0.625446
AT1G13700	protein_coding	glucosamine/galactosamine-6-phosphate isomerase family protein		Identical to Probable 6-phosphogluconolactonase 1 [Arabidopsis Thaliana] (GB:Q9LMX8); similar to EMB2024 (EMBRYO DEFECTIVE 2024), catalytic [Arabidopsis thaliana] (TAIR:AT5G24400.1); similar to hypothetical protein [Vitis vinifera] (GB:CAN72406.1); conta	0	0	#DIV/0!	0	1	0	0	1	0	1.16929	0.521979
AT1G13880	protein_coding	ELM2 domain-containing protein		similar to myb family transcription factor / ELM2 domain-containing protein [Arabidopsis thaliana] (TAIR:AT2G03470.2); similar to unnamed protein product [Vitis vinifera] (GB:CAO41886.1); contains InterPro domain SANT, DNA-binding; (InterPro:IPR001005); c	0	1	0	0	1	0	0	2	0	1.02917	0.83665
AT1G13930	protein_coding			similar to nodulin-related [Arabidopsis thaliana] (TAIR:AT2G03440.1); similar to hypothetical protein [Vitis vinifera] (GB:CAN63832.1)	0	1	0	0	1	0	0	2	0	0.0714513	0.0131041
AT1G14360	protein_coding	ATUTR3/UTR3 (UDP-GALACTOSE TRANSPORTER 3); pyrimidine nucleotide sugar transmembrane transporter		similar to ATUTR1/UTR1 (UDP-GALACTOSE TRANSPORTER 1), UDP-galactose transmembrane transporter/ UDP-glucose transmembrane transporter/ pyrimidine nucleotide sugar transmembrane transporter [Arabidopsis thaliana] (TAIR:AT2G02810.1); similar to UDP-galactose	0	1	0	0	0	#DIV/0!	0	1	0	0.421715	0.098571
AT1G14500	protein_coding	ankyrin repeat family protein		similar to protein binding [Arabidopsis thaliana] (TAIR:AT1G14480.1); similar to Ankyrin [Medicago truncatula] (GB:ABO82122.1); contains InterPro domain Ankyrin (InterPro:IPR002110)	0	0	#DIV/0!	0	1	0	0	1	0
AT1G14510	protein_coding	PHD finger family protein		similar to PHD finger family protein [Arabidopsis thaliana] (TAIR:AT2G02470.1); similar to PHD5 [Glycine max] (GB:ABI97244.1); contains InterPro domain Zinc finger, RING/FYVE/PHD-type (InterPro:IPR013083); contains InterPro domain Zinc finger, PHD-type; (	0	0	#DIV/0!	0	1	0	0	1	0	1.0057	0.96966
AT1G14530	protein_coding	(TOM THREE HOMOLOG); virion binding		similar to TOM3 (tobamovirus multiplication protein 3) [Arabidopsis thaliana] (TAIR:AT2G02180.1); similar to unknown [Brassica rapa] (GB:ABJ15786.1); contains InterPro domain Protein of unknown function DUF1084 (InterPro:IPR009457)	0	1	0	0	0	#DIV/0!	0	1	0	1.09493	0.727553
AT1G14820	protein_coding	SEC14 cytosolic factor family protein / phosphoglyceride transfer family protein		similar to SEC14 cytosolic factor, putative / phosphoglyceride transfer protein, putative [Arabidopsis thaliana] (TAIR:AT1G01630.1); similar to unnamed protein product [Vitis vinifera] (GB:CAO42369.1); contains InterPro domain Cellular retinaldehyde-bindi	0	0	#DIV/0!	0	1	0	0	1	0	0.812441	0.11456
AT1G14870	protein_coding			Identical to Uncharacterized protein At1g14870 [Arabidopsis Thaliana] (GB:Q9LQU4); similar to unknown protein [Arabidopsis thaliana] (TAIR:AT5G35525.1); similar to unnamed protein product [Vitis vinifera] (GB:CAO42338.1); contains InterPro domain Aspartic	0	1	0	0	0	#DIV/0!	0	1	0	0.900525	0.397624
AT1G14910	protein_coding	epsin N-terminal homology (ENTH) domain-containing protein		Identical to Putative clathrin assembly protein At1g14910 [Arabidopsis Thaliana] (GB:P94017;GB:Q8L644;GB:Q9LQU0); similar to epsin N-terminal homology (ENTH) domain-containing protein [Arabidopsis thaliana] (TAIR:AT2G01600.1); similar to unnamed protein p	0	2	0	0	0	#DIV/0!	0	2	0	0.583159	0.028499
AT1G15120	protein_coding	ubiquinol-cytochrome C reductase complex 7.8 kDa protein, putative / mitochondrial hinge protein, putative		similar to ubiquinol-cytochrome C reductase complex 7.8 kDa protein, putative / mitochondrial hinge protein, putative [Arabidopsis thaliana] (TAIR:AT2G01090.1); similar to hypothetical protein OsI_034030 [Oryza sativa (indica cultivar-group)] (GB:EAY80071	0	2	0	0	0	#DIV/0!	0	2	0	0.810753	0.0795745
AT1G15140	protein_coding	oxidoreductase NAD-binding domain-containing protein		similar to ATLFNR2 (LEAF FNR 2), poly(U) binding [Arabidopsis thaliana] (TAIR:AT1G20020.3); similar to ATLFNR2 (LEAF FNR 2), NADPH dehydrogenase/ oxidoreductase/ poly(U) binding [Arabidopsis thaliana] (TAIR:AT1G20020.1); similar to ATLFNR2 (LEAF FNR 2), p	0	0	#DIV/0!	0	1	0	0	1	0	1.14014	0.404506
AT1G15180	protein_coding	MATE efflux family protein		similar to MATE efflux family protein [Arabidopsis thaliana] (TAIR:AT1G15150.1); similar to MATE efflux family protein [Arabidopsis thaliana] (TAIR:AT1G15160.1); similar to MATE efflux family protein [Arabidopsis thaliana] (TAIR:AT1G15170.1); similar to u	0	0	#DIV/0!	0	1	0	0	1	0	1.37614	0.0062112
AT1G15340	protein_coding	MBD10 (methyl-CpG-binding domain 10); DNA binding	Protein containing methyl-CpG-binding domain.Has sequence similarity to human MBD proteins.	similar to MBD11 (methyl-CpG-binding domain 11), DNA binding [Arabidopsis thaliana] (TAIR:AT3G15790.1); similar to unnamed protein product [Vitis vinifera] (GB:CAO62732.1); contains InterPro domain DNA-binding, integrase-type; (InterPro:IPR016177); contai	0	1	0	0	0	#DIV/0!	0	1	0	1.00363	0.980925
AT1G15380	protein_coding	lactoylglutathione lyase family protein / glyoxalase I family protein		similar to lactoylglutathione lyase family protein / glyoxalase I family protein [Arabidopsis thaliana] (TAIR:AT1G80160.1); similar to unnamed protein product [Vitis vinifera] (GB:CAO62772.1); contains InterPro domain Glyoxalase/bleomycin resistance prote	0	0	#DIV/0!	0	1	0	0	1	0	1.52351	0.328532
AT1G15440	protein_coding	transducin family protein / WD-40 repeat family protein		similar to transducin family protein / WD-40 repeat family protein [Arabidopsis thaliana] (TAIR:AT3G49660.1); similar to unnamed protein product [Vitis vinifera] (GB:CAO46046.1); similar to hypothetical protein [Vitis vinifera] (GB:CAN74744.1); similar to	0	0	#DIV/0!	0	1	0	0	1	0	0.786276	0.0614971
AT1G15590	protein_coding			similar to zinc finger (C3HC4-type RING finger) family protein [Arabidopsis thaliana] (TAIR:AT1G80400.1); similar to unnamed protein product [Vitis vinifera] (GB:CAO45956.1)	0	1	0	0	0	#DIV/0!	0	1	0	1.08354	0.52639
AT1G15740	protein_coding	leucine-rich repeat family protein		similar to leucine-rich repeat family protein [Arabidopsis thaliana] (TAIR:AT4G23840.1); similar to unnamed protein product [Vitis vinifera] (GB:CAO66763.1); contains InterPro domain Leucine-rich repeat; (InterPro:IPR001611)	0	0	#DIV/0!	0	1	0	0	1	0	1.17042	0.348385
AT1G15780	protein_coding	protein binding / transcription cofactor		similar to unknown protein [Arabidopsis thaliana] (TAIR:AT2G10440.1); similar to CTV.22 [Poncirus trifoliata] (GB:AAN62354.1); contains InterPro domain Coactivator CBP, KIX; (InterPro:IPR003101)	0	0	#DIV/0!	0	1	0	0	1	0	1.07062	0.668512
AT1G15880	protein_coding	GOS11 (GOLGI SNARE 11); SNARE binding	Golgi SNARE 11 protein (GOS11)	Identical to Golgi SNARE 11 protein (GOS11) [Arabidopsis Thaliana] (GB:Q9LMP7); similar to GOS12 (GOLGI SNARE 12), SNARE binding [Arabidopsis thaliana] (TAIR:AT2G45200.1); similar to unnamed protein product [Vitis vinifera] (GB:CAO44283.1); contains Inte	0	0	#DIV/0!	0	1	0	0	1	0	1.08118	0.618601
AT1G16180	protein_coding	TMS membrane family protein / tumour differentially expressed (TDE) family protein		similar to TMS membrane family protein / tumour differentially expressed (TDE) family protein [Arabidopsis thaliana] (TAIR:AT3G06170.1); similar to unknown [Populus trichocarpa] (GB:ABK96018.1); contains InterPro domain TMS membrane protein/tumour differe	0	0	#DIV/0!	0	1	0	0	1	0	1.08468	0.542042
AT1G16250	protein_coding	kelch repeat-containing F-box family protein		Identical to F-box/Kelch-repeat protein At1g16250 [Arabidopsis Thaliana] (GB:Q0WW40;GB:Q9SA24); similar to kelch repeat-containing F-box family protein [Arabidopsis thaliana] (TAIR:AT3G63220.2); similar to kelch repeat-containing F-box family protein [Ara	0	0	#DIV/0!	0	1	0	0	1	0
AT1G16670	protein_coding	protein kinase family protein		similar to protein kinase family protein [Arabidopsis thaliana] (TAIR:AT3G09010.1); similar to hypothetical protein [Vitis vinifera] (GB:CAN64306.1); contains InterPro domain Protein kinase, core; (InterPro:IPR000719); contains InterPro domain Protein kin	0	0	#DIV/0!	0	1	0	0	1	0	0.908475	0.773691
AT1G16720	protein_coding	HCF173 (HIGH CHLOROPHYLL FLUORESCENCE PHENOTYPE 173); binding / catalytic/ oxidoreductase/ transcription repressor	Encodes HCF173, a protein with weak similarities to the superfamily of the short-chain dehydrogenases/reductases. HCF173 is involved in the initiation of translation of the psbA mRNA. Mutants shows a high chlorophyll fluorescence phenotype (hcf) and are	similar to binding / catalytic/ transcription repressor [Arabidopsis thaliana] (TAIR:AT4G18810.1); similar to unnamed protein product [Vitis vinifera] (GB:CAO41779.1); similar to unknown [Populus trichocarpa] (GB:ABK95912.1); similar to hypothetical prote	0	1	0	0	0	#DIV/0!	0	1	0	1.35518	0.0742959
AT1G16916	protein_coding			similar to hypothetical protein MtrDRAFT_AC151598g7v2 [Medicago truncatula] (GB:ABD32939.1)	0	1	0	0	0	#DIV/0!	0	1	0
AT1G17290	protein_coding	ALAAT1 (ALANINE AMINOTRANSFERAS); alanine transaminase	Encodes for alanine aminotransferase (ALAAT1), involved in alanine catabolism during plants recovery from hypoxia	similar to ALAAT2 (ALANINE AMINOTRANSFERASE 2), alanine transaminase [Arabidopsis thaliana] (TAIR:AT1G72330.1); similar to ALAAT2 (ALANINE AMINOTRANSFERASE 2) [Arabidopsis thaliana] (TAIR:AT1G72330.2); similar to alanine aminotransferase [Capsicum annuum]	0	1	0	0	1	0	0	2	0	0.874203	0.471713
AT1G17370	protein_coding	UBP1B (OLIGOURIDYLATE BINDING PROTEIN 1B); mRNA 3'-UTR binding		similar to oligouridylate-binding protein, putative [Arabidopsis thaliana] (TAIR:AT3G14100.1); similar to oligouridylate binding protein-like protein [Solanum tuberosum] (GB:ABB72820.1); similar to hypothetical protein [Vitis vinifera] (GB:CAN65009.1); si	0	0	#DIV/0!	0	1	0	0	1	0	0.966471	0.710291
AT1G17710	protein_coding	phosphoric monoester hydrolase		similar to phosphoric monoester hydrolase [Arabidopsis thaliana] (TAIR:AT1G73010.1); similar to putative phosphatase [Phaseolus vulgaris] (GB:ABP52095.1); contains InterPro domain HAD-superfamily hydrolase, subfamily IB, hypothetical 1 (InterPro:IPR006384	0	2	0	0	0	#DIV/0!	0	2	0	1.47029	0.318267
AT1G17745	protein_coding	PGDH (3-PHOSPHOGLYCERATE DEHYDROGENASE); phosphoglycerate dehydrogenase	encodes a 3-Phosphoglycerate dehydrogenase	Identical to D-3-phosphoglycerate dehydrogenase, chloroplast precursor [Arabidopsis Thaliana] (GB:O04130); similar to EDA9 (embryo sac development arrest 9), NAD binding / amino acid binding / binding / catalytic/ cofactor binding / oxidoreductase, actin	0	0	#DIV/0!	0	1	0	0	1	0	1.04728	0.863338
AT1G17760	protein_coding	ATCSTF77/CSTF77 (Cleavage stimulation factor 77); protein binding	Encodes a homolog of the mammalian protein CstF77, a polyadenylation factor subunit.	similar to PRP39, binding [Arabidopsis thaliana] (TAIR:AT1G04080.1); similar to hypothetical protein OsI_037553 [Oryza sativa (indica cultivar-group)] (GB:EAY83594.1); similar to hypothetical protein OsJ_035149 [Oryza sativa (japonica cultivar-group)] (GB	0	0	#DIV/0!	0	1	0	0	1	0	1.07652	0.661388
AT1G17820	protein_coding			similar to unknown protein [Arabidopsis thaliana] (TAIR:AT1G73200.1); similar to unnamed protein product [Vitis vinifera] (GB:CAO62030.1); contains InterPro domain Pleckstrin-like (InterPro:IPR001849)	0	1	0	0	0	#DIV/0!	0	1	0
AT1G18060	protein_coding			similar to unnamed protein product [Vitis vinifera] (GB:CAO68142.1)	0	0	#DIV/0!	0	1	0	0	1	0	1.11769	0.394793
AT1G18070	protein_coding	EF-1-alpha-related GTP-binding protein, putative		similar to elongation factor 1-alpha / EF-1-alpha [Arabidopsis thaliana] (TAIR:AT5G60390.1); similar to elongation factor 1-alpha / EF-1-alpha [Arabidopsis thaliana] (TAIR:AT1G07940.2); similar to elongation factor 1-alpha / EF-1-alpha [Arabidopsis thalia	0	1	0	0	0	#DIV/0!	0	1	0	1.01229	0.963714
AT1G18180	protein_coding	oxidoreductase, acting on the CH-CH group of donors		similar to oxidoreductase, acting on the CH-CH group of donors [Arabidopsis thaliana] (TAIR:AT1G73650.3); similar to unnamed protein product [Vitis vinifera] (GB:CAO68176.1); contains InterPro domain Protein of unknown function DUF1295 (InterPro:IPR010721	0	0	#DIV/0!	0	2	0	0	2	0	1.08127	0.353731
AT1G18470	protein_coding	zinc finger (C3HC4-type RING finger) family protein		similar to zinc finger (C3HC4-type RING finger) family protein [Arabidopsis thaliana] (TAIR:AT1G73950.1); similar to hypothetical protein [Trifolium pratense] (GB:BAE71207.1); similar to Putative finger family protein [Brassica oleracea] (GB:AAW81737.1);	0	0	#DIV/0!	0	1	0	0	1	0	1.10177	0.516111
AT1G18480	protein_coding	calcineurin-like phosphoesterase family protein		similar to calcineurin-like phosphoesterase family protein [Arabidopsis thaliana] (TAIR:AT1G07010.1); similar to Putative [Brassica oleracea] (GB:AAW81738.1); contains InterPro domain Metallophosphoesterase; (InterPro:IPR004843)	0	2	0	0	1	0	0	3	0	1.14126	0.640492
AT1G18640	protein_coding	PSP (3-PHOSPHOSERINE PHOSPHATASE)	3-phosphoserine phosphatase acting in the last step of serine biosynthesis within the chloroplast	Identical to Phosphoserine phosphatase, chloroplast precursor (PSP) [Arabidopsis Thaliana] (GB:O82796;GB:Q9FZ85); similar to unnamed protein product [Vitis vinifera] (GB:CAO64433.1); contains InterPro domain Haloacid dehalogenase-like hydrolase; (InterPr	0	0	#DIV/0!	0	2	0	0	2	0	1.04299	0.834639
AT1G18660	protein_coding	zinc finger (C3HC4-type RING finger) family protein		similar to ATP-dependent protease La (LON) domain-containing protein [Arabidopsis thaliana] (TAIR:AT1G75460.1); similar to unnamed protein product [Vitis vinifera] (GB:CAO64510.1); contains InterPro domain Zinc finger, RING/FYVE/PHD-type (InterPro:IPR0130	0	0	#DIV/0!	0	1	0	0	1	0	0.766479	0.0368675
AT1G18730	protein_coding			similar to unknown [Populus trichocarpa] (GB:ABK95263.1)	0	0	#DIV/0!	0	1	0	0	1	0	1.33422	0.0639763
AT1G18960	protein_coding	myb family transcription factor		similar to AtMYB35 (myb domain protein 35), DNA binding / transcription factor [Arabidopsis thaliana] (TAIR:AT3G28470.1); similar to unnamed protein product [Vitis vinifera] (GB:CAO62475.1); contains InterPro domain Myb transcription factor (InterPro:IPR0	0	0	#DIV/0!	0	1	0	0	1	0
AT1G19100	protein_coding	ATP-binding region, ATPase-like domain-containing protein-related		similar to ATP-binding region, ATPase-like domain-containing protein [Arabidopsis thaliana] (TAIR:AT4G36290.1); similar to unnamed protein product [Vitis vinifera] (GB:CAO64293.1); contains InterPro domain ATP-binding region, ATPase-like; (InterPro:IPR003	0	1	0	0	0	#DIV/0!	0	1	0	1.19016	0.0342052
AT1G19110	protein_coding	inter-alpha-trypsin inhibitor heavy chain-related		similar to inter-alpha-trypsin inhibitor heavy chain-related [Arabidopsis thaliana] (TAIR:AT1G72500.1); similar to unnamed protein product [Vitis vinifera] (GB:CAO45601.1); similar to unnamed protein product [Vitis vinifera] (GB:CAO65221.1); similar to vo	0	0	#DIV/0!	0	1	0	0	1	0	1.1679	0.270841
AT1G19140	protein_coding			similar to unnamed protein product [Vitis vinifera] (GB:CAO65215.1); contains InterPro domain Ubiquinone biosynthesis protein COQ9; (InterPro:IPR012762); contains InterPro domain COQ9 (InterPro:IPR013718)	0	0	#DIV/0!	0	2	0	0	2	0	0.643203	0.0477527
AT1G19650	protein_coding	SEC14 cytosolic factor, putative / phosphoglyceride transfer protein, putative		similar to SEC14 cytosolic factor, putative / phosphatidylinositol transfer-like protein, putative [Arabidopsis thaliana] (TAIR:AT1G75370.1); similar to unnamed protein product [Vitis vinifera] (GB:CAO61112.1); similar to unnamed protein product [Vitis vi	0	1	0	0	1	0	0	2	0	3.21223	0.160511
AT1G19680	protein_coding	protein binding / zinc ion binding		similar to protein binding / zinc ion binding [Arabidopsis thaliana] (TAIR:AT1G75400.1); similar to unnamed protein product [Vitis vinifera] (GB:CAO61102.1); contains InterPro domain Zinc finger, RING-type; (InterPro:IPR001841)	0	0	#DIV/0!	0	1	0	0	1	0	1.21331	0.319827
AT1G19710	protein_coding	glycosyl transferase family 1 protein		similar to glycosyl transferase family 1 protein [Arabidopsis thaliana] (TAIR:AT1G75420.1); similar to hypothetical protein [Vitis vinifera] (GB:CAN73426.1); similar to unnamed protein product [Vitis vinifera] (GB:CAO61097.1); contains InterPro domain Gly	0	1	0	0	2	0	0	3	0	0.582434	0.24693
AT1G19910	protein_coding	AVA-P2 (vacuolar-H+-pumping ATPase 16 kDa proteolipid subunit 2); ATPase	vacuolar H+-pumping ATPase 16 kDa proteolipid (ava-p2)	Identical to Vacuolar ATP synthase 16 kDa proteolipid subunit 2 (AVAP2) [Arabidopsis Thaliana] (GB:P59228;GB:Q39037;GB:Q39038;GB:Q39039;GB:Q42424;GB:Q96298); similar to vacuolar ATP synthase 16 kDa proteolipid subunit 5 / V-ATPase 16 kDa proteolipid subu	0	1	0	0	1	0	0	2	0
AT1G20225	protein_coding			similar to unknown protein [Arabidopsis thaliana] (TAIR:AT1G76020.1); similar to unknown [Solanum tuberosum] (GB:ABB55396.1); contains InterPro domain Thioredoxin-like fold (InterPro:IPR012336)	0	0	#DIV/0!	0	1	0	0	1	0
AT1G20270	protein_coding	oxidoreductase, 2OG-Fe(II) oxygenase family protein		similar to oxidoreductase, 2OG-Fe(II) oxygenase family protein [Arabidopsis thaliana] (TAIR:AT2G17720.1); similar to unnamed protein product [Vitis vinifera] (GB:CAO61966.1); contains InterPro domain Prolyl 4-hydroxylase, alpha subunit; (InterPro:IPR00662	0	0	#DIV/0!	0	2	0	0	2	0	0.769367	0.305084
AT1G20460	protein_coding			similar to unknown protein [Arabidopsis thaliana] (TAIR:AT1G76185.1); similar to unknown [Brassica juncea] (GB:ABO71663.1)	0	1	0	0	0	#DIV/0!	0	1	0
AT1G20540	protein_coding	transducin family protein / WD-40 repeat family protein		similar to transducin family protein / WD-40 repeat family protein [Arabidopsis thaliana] (TAIR:AT1G76260.1); similar to unnamed protein product [Vitis vinifera] (GB:CAO62019.1); contains InterPro domain WD40 repeat-like (InterPro:IPR011046); contains Int	0	0	#DIV/0!	0	1	0	0	1	0	0.912964	0.688109
AT1G20575	protein_coding	dolichyl-phosphate beta-D-mannosyltransferase, putative / dolichol-phosphate mannosyltransferase, putative / mannose-P-dolichol synthase, putative		similar to glycosyl transferase family 2 protein [Arabidopsis thaliana] (TAIR:AT2G39630.1); similar to unnamed protein product [Vitis vinifera] (GB:CAO62025.1); contains InterPro domain Glycosyl transferase, family 2 (InterPro:IPR001173)	0	0	#DIV/0!	0	1	0	0	1	0	0.884042	0.4597
AT1G20580	protein_coding	small nuclear ribonucleoprotein, putative / snRNP, putative / Sm protein, putative		similar to SMD3 (SNRNP CORE PROTEIN SMD3) [Arabidopsis thaliana] (TAIR:AT1G76300.1); similar to unknown [Picea sitchensis] (GB:ABK21888.1); contains InterPro domain Like-Sm ribonucleoprotein, core; (InterPro:IPR001163); contains InterPro domain Like-Sm ri	0	1	0	0	0	#DIV/0!	0	1	0	1.0138	0.931584
AT1G20610	protein_coding	CYCB2;3 (CYCLIN B2;3); cyclin-dependent protein kinase regulator		Identical to Cyclin-B2-3 (CYCB2-3) [Arabidopsis Thaliana] (GB:Q9LDM4;GB:A1L4V3); similar to CYCB2,4 (CYCLIN B2,4), cyclin-dependent protein kinase regulator [Arabidopsis thaliana] (TAIR:AT1G76310.1); similar to unnamed protein product [Vitis vinifera] (G	0	1	0	0	0	#DIV/0!	0	1	0
AT1G21000	protein_coding	zinc-binding family protein		similar to zinc-binding family protein [Arabidopsis thaliana] (TAIR:AT1G76590.1); similar to unknown [Populus trichocarpa x Populus deltoides] (GB:ABK96587.1); contains InterPro domain Protein of unknown function DUF597 (InterPro:IPR006734)	0	0	#DIV/0!	0	1	0	0	1	0	1.18118	0.255265
AT1G21070	protein_coding	transporter-related		similar to transporter-related [Arabidopsis thaliana] (TAIR:AT1G76670.1); similar to unnamed protein product [Vitis vinifera] (GB:CAO66327.1); contains InterPro domain Protein of unknown function DUF250 (InterPro:IPR004853)	0	0	#DIV/0!	0	1	0	0	1	0	1.05824	0.654727
AT1G21510	protein_coding			similar to unknown [Populus trichocarpa] (GB:ABK93661.1)	0	1	0	0	0	#DIV/0!	0	1	0	1.27136	0.182554
AT1G21680	protein_coding			similar to unknown protein [Arabidopsis thaliana] (TAIR:AT1G21670.1); similar to hypothetical protein [Vitis vinifera] (GB:CAN73514.1); similar to unnamed protein product [Vitis vinifera] (GB:CAO61906.1); similar to hypothetical protein OsJ_012725 [Oryza	0	0	#DIV/0!	0	1	0	0	1	0	0.984879	0.974836
AT1G21720	protein_coding	PBC1 (20S proteasome beta subunit C1); peptidase	20S proteasome beta subunit PBC1 truncated protein (PBC1)	Identical to Proteasome subunit beta type-3-A (PBC1) [Arabidopsis Thaliana] (GB:Q9XI05;GB:O23707;GB:Q0WWF5;GB:Q8LEA7;GB:Q8VZC4); similar to PBC2 (20S proteasome beta subunit C 2), peptidase [Arabidopsis thaliana] (TAIR:AT1G77440.2); similar to PBC2 (20S	0	0	#DIV/0!	0	1	0	0	1	0	0.778658	0.366503
AT1G21780	protein_coding	BTB/POZ domain-containing protein	BTB/POZ domain-containing protein. Contains similarity to gb:AJ000644 SPOP (speckle-type POZ protein) from Homo sapiens and contains a PF:00651 BTB/POZ domain. ESTs gb:T75841, gb:R89974, gb:R30221, gb:N96386, gb:T76457, gb:AI100013 and gb:T76456 come from	similar to BTB/POZ domain-containing protein [Arabidopsis thaliana] (TAIR:AT1G55760.1); similar to unnamed protein product [Vitis vinifera] (GB:CAO61875.1); contains InterPro domain BTB/POZ fold; (InterPro:IPR011333); contains InterPro domain Kelch relate	0	0	#DIV/0!	0	1	0	0	1	0	0.942936	0.87109
AT1G21880	protein_coding	LYM1 (LYSM DOMAIN GPI-ANCHORED PROTEIN 1 PRECURSOR)		Identical to LysM domain-containing GPI-anchored protein 1 precursor [Arabidopsis Thaliana] (GB:Q93ZH0;GB:Q9SFE8); similar to peptidoglycan-binding LysM domain-containing protein [Arabidopsis thaliana] (TAIR:AT1G77630.1); similar to unnamed protein produc	0	1	0	0	0	#DIV/0!	0	1	0	0.799082	0.273913
AT1G21900	protein_coding	emp24/gp25L/p24 family protein		similar to emp24/gp25L/p24 family protein [Arabidopsis thaliana] (TAIR:AT1G09580.1); similar to unnamed protein product [Vitis vinifera] (GB:CAO24730.1); contains InterPro domain emp24/gp25L/p24; (InterPro:IPR000348); contains InterPro domain GOLD (InterP	0	0	#DIV/0!	0	1	0	0	1	0	0.853799	0.533177
AT1G21990	protein_coding	F-box family protein		Identical to Putative F-box protein At1g21990 [Arabidopsis Thaliana] (GB:Q9LM64); similar to F-box family protein [Arabidopsis thaliana] (TAIR:AT2G29930.3); similar to F-box family protein [Arabidopsis thaliana] (TAIR:AT2G29930.1); similar to unnamed prot	0	1	0	0	0	#DIV/0!	0	1	0
AT1G22020	protein_coding	SHM6 (serine hydroxymethyltransferase 6); glycine hydroxymethyltransferase	Encodes a putative serine hydroxymethyltransferase.	similar to SHM7 (serine hydroxymethyltransferase 7), glycine hydroxymethyltransferase [Arabidopsis thaliana] (TAIR:AT1G36370.1); similar to unnamed protein product [Vitis vinifera] (GB:CAO61783.1); similar to unnamed protein product [Vitis vinifera] (GB:C	0	1	0	0	0	#DIV/0!	0	1	0	1.01099	0.919058
AT1G22200	protein_coding			similar to unknown protein [Arabidopsis thaliana] (TAIR:AT1G36050.1); similar to unnamed protein product [Vitis vinifera] (GB:CAO61738.1); contains InterPro domain Protein of unknown function DUF1692 (InterPro:IPR012936)	0	0	#DIV/0!	0	1	0	0	1	0	1.05036	0.832777
AT1G22280	protein_coding	protein phosphatase 2C, putative / PP2C, putative		similar to protein phosphatase 2C, putative / PP2C, putative [Arabidopsis thaliana] (TAIR:AT1G34750.1); similar to unnamed protein product [Vitis vinifera] (GB:CAO61717.1); contains InterPro domain Protein phosphatase 2C-related; (InterPro:IPR001932); con	0	0	#DIV/0!	0	1	0	0	1	0	0.843606	0.200557
AT1G22510	protein_coding	zinc finger (C3HC4-type RING finger) family protein		similar to zinc finger (C3HC4-type RING finger) family protein [Arabidopsis thaliana] (TAIR:AT1G72175.1); similar to unnamed protein product [Vitis vinifera] (GB:CAO64673.1); contains InterPro domain Zinc finger, RING/FYVE/PHD-type (InterPro:IPR013083); c	0	0	#DIV/0!	0	1	0	0	1	0	0.830463	0.519724
AT1G22850	protein_coding			similar to unknown protein [Arabidopsis thaliana] (TAIR:AT1G03260.1); similar to unnamed protein product [Vitis vinifera] (GB:CAO44594.1); contains InterPro domain SNARE associated Golgi protein (InterPro:IPR015414)	0	0	#DIV/0!	0	1	0	0	1	0	1.54291	0.291491
AT1G23205	protein_coding	invertase/pectin methylesterase inhibitor family protein		similar to invertase/pectin methylesterase inhibitor family protein [Arabidopsis thaliana] (TAIR:AT1G70720.1); similar to hypothetical protein [Vitis vinifera] (GB:CAN63370.1); contains InterPro domain Pectinesterase inhibitor; (InterPro:IPR006501)	0	1	0	0	0	#DIV/0!	0	1	0	0.904314	0.176381
AT1G23400	protein_coding	ATCAF2/CAF2 (ARABIDOPSIS THALIANA HOMOLOG OF MAIZE CAF2)		Identical to CRS2-associated factor 2, chloroplast precursor [Arabidopsis Thaliana] (GB:Q9LDA9); similar to unknown protein [Arabidopsis thaliana] (TAIR:AT2G20020.1); similar to unnamed protein product [Vitis vinifera] (GB:CAO66095.1); contains InterPro	0	0	#DIV/0!	0	1	0	0	1	0	0.936977	0.701856
AT1G23740	protein_coding	oxidoreductase, zinc-binding dehydrogenase family protein		Identical to Quinone oxidoreductase-like protein At1g23740, chloroplast precursor [Arabidopsis Thaliana] (GB:Q9ZUC1;GB:Q945P3); similar to oxidoreductase, zinc-binding dehydrogenase family protein [Arabidopsis thaliana] (TAIR:AT4G13010.1); similar to unk	0	1	0	0	0	#DIV/0!	0	1	0	1.07834	0.363086
AT1G23870	protein_coding	ATTPS9 (Arabidopsis thaliana trehalose-phosphatase/synthase 9); transferase, transferring glycosyl groups / trehalose-phosphatase	Encodes an enzyme putatively involved in trehalose biosynthesis. The protein has a trehalose synthase (TPS)-like domain that may or may not be active as well as a trehalose phosphatase (TPP)-like domain.	similar to ATTPS6 (Arabidopsis thaliana trehalose phosphatase/synthase 6), trehalose-phosphatase [Arabidopsis thaliana] (TAIR:AT1G68020.2); similar to ATTPS8 (Arabidopsis thaliana trehalose phosphatase/synthase 8), transferase, transferring glycosyl group	0	0	#DIV/0!	0	1	0	0	1	0	0.791449	0.235808
AT1G23880	protein_coding	NHL repeat-containing protein		similar to NHL repeat-containing protein [Arabidopsis thaliana] (TAIR:AT1G70280.2); similar to hypothetical protein [Vitis vinifera] (GB:CAN69794.1); contains InterPro domain NHL repeat (InterPro:IPR001258); contains InterPro domain Six-bladed beta-propel	0	1	0	0	0	#DIV/0!	0	1	0	0.539456	0.0108282
AT1G23900	protein_coding	GAMMA-ADAPTIN 1; clathrin binding	Encodes large subunit of the heterotetrameric adaptor protein complex AP-1. AP-1 is required for clathrin coated vesicles budding from the trans-Golgi network or plasma membrane	similar to clathrin binding [Arabidopsis thaliana] (TAIR:AT1G60070.1); similar to hypothetical protein OsJ_019439 [Oryza sativa (japonica cultivar-group)] (GB:EAZ35956.1); similar to unnamed protein product [Vitis vinifera] (GB:CAO40914.1); similar to hyp	0	0	#DIV/0!	0	1	0	0	1	0
AT1G24388	protein_coding			similar to unknown protein [Arabidopsis thaliana] (TAIR:AT4G17700.1)	0	0	#DIV/0!	0	1	0	0	1	0
AT1G24440	protein_coding	protein binding / zinc ion binding		similar to zinc finger (C3HC4-type RING finger) family protein [Arabidopsis thaliana] (TAIR:AT1G13195.1); similar to unnamed protein product [Vitis vinifera] (GB:CAO46701.1); contains InterPro domain Zinc finger, RING/FYVE/PHD-type (InterPro:IPR013083); c	0	0	#DIV/0!	0	2	0	0	2	0	0.87726	0.57129
AT1G24560	protein_coding			similar to protein binding [Arabidopsis thaliana] (TAIR:AT3G49055.1); similar to hypothetical protein [Vitis vinifera] (GB:CAN66327.1)	0	0	#DIV/0!	0	1	0	0	1	0	1.04655	0.707888
AT1G24735	protein_coding	caffeoyl-CoA 3-O-methyltransferase, putative		similar to CCoAMT (caffeoyl-CoA 3-O-methyltransferase), caffeoyl-CoA O-methyltransferase [Arabidopsis thaliana] (TAIR:AT1G67980.1); similar to unknown [Populus trichocarpa] (GB:ABK94201.1); contains InterPro domain O-methyltransferase, family 3; (InterPro	0	3	0	0	1	0	0	4	0	1.18203	0.126383
AT1G25480	protein_coding			similar to unknown protein [Arabidopsis thaliana] (TAIR:AT2G17470.1); similar to unknown protein [Arabidopsis thaliana] (TAIR:AT1G68600.1); similar to unnamed protein product [Vitis vinifera] (GB:CAO42118.1); contains InterPro domain Protein of unknown fu	0	0	#DIV/0!	0	1	0	0	1	0
AT1G25510	protein_coding	aspartyl protease family protein		similar to aspartyl protease family protein [Arabidopsis thaliana] (TAIR:AT3G18490.1); similar to unnamed protein product [Vitis vinifera] (GB:CAO42109.1); contains InterPro domain Peptidase aspartic, catalytic; (InterPro:IPR009007); contains InterPro dom	0	0	#DIV/0!	0	1	0	0	1	0	1.10647	0.143234
AT1G26480	protein_coding	GRF12 (GENERAL REGULATORY FACTOR 12); protein phosphorylated amino acid binding	14-3-3 protein GF14iota (grf12)	Identical to 14-3-3-like protein GF14 iota (GRF12) [Arabidopsis Thaliana] (GB:Q9C5W6;GB:Q9FZD3); similar to GRF9 (GENERAL REGULATORY FACTOR 9), protein phosphorylated amino acid binding [Arabidopsis thaliana] (TAIR:AT2G42590.3); similar to GRF9 (GENERAL	0	0	#DIV/0!	0	1	0	0	1	0	1.25609	0.294941
AT1G26550	protein_coding	peptidyl-prolyl cis-trans isomerase PPIC-type family protein		similar to PIN1AT (parvulin 1At) [Arabidopsis thaliana] (TAIR:AT2G18040.1); similar to parvulin-type peptidyl-prolyl cis/trans isomerase [Lotus japonicus] (GB:CAM59672.1); contains InterPro domain Peptidyl-prolyl cis-trans isomerase, PpiC-type; (InterPro:	0	1	0	0	0	#DIV/0!	0	1	0	0.731678	0.0349485
AT1G26670	protein_coding	ATVTI12/VTI12/VTI1B (VESICAL TRANSPORT V-SNARE 12); SNARE binding / receptor/ soluble NSF attachment protein	member of VTI1 Gene Family. Normally localizes to the transgolgi network and plasma membrane. A dominant mutation (zip1) alters the subcellular localization of VTI12 and suppresses loss of function mutation (zag1) of VTI11. Interacts with members of the	Identical to Vesicle transport v-SNARE 12 (VTI12) [Arabidopsis Thaliana] (GB:Q9SEL5;GB:Q9LQY5); similar to ATVTI11/ATVTI1A/SGR4/VTI11/VTI1A/ZIG (VESICLE TRANSPORT V-SNARE 11), receptor [Arabidopsis thaliana] (TAIR:AT5G39510.1); similar to hypothetical pr	0	1	0	0	1	0	0	2	0	0.907302	0.131166
AT1G26840	protein_coding	ATORC6/ORC6 (Origin recognition complex protein 6); DNA binding	Origin Recognition Complex subunit 6. Involved in the initiation of DNA replication. Regulated transcriptionally during cell cycle, peaking at G1/S-phase. Target of E2F/DF family of transcription factors.	Identical to Origin recognition complex subunit 6 (ORC6) [Arabidopsis Thaliana] (GB:Q9ZVH3;GB:Q6EWW9); similar to Probable origin recognition complex subunit 6, putative [Solanum demissum] (GB:AAU93586.1); contains InterPro domain Origin recognition compl	0	0	#DIV/0!	0	1	0	0	1	0	1.73782	0.0225069
AT1G26930	protein_coding	kelch repeat-containing F-box family protein		Identical to F-box/Kelch-repeat protein At1g26930 [Arabidopsis Thaliana] (GB:Q84M94;GB:Q9ZVG5); similar to kelch repeat-containing F-box family protein [Arabidopsis thaliana] (TAIR:AT2G02870.2); similar to kelch repeat-containing F-box family protein [Ara	0	0	#DIV/0!	0	1	0	0	1	0	1.02178	0.94505
AT1G27090	protein_coding	glycine-rich protein		similar to unknown protein [Arabidopsis thaliana] (TAIR:AT3G24690.1); similar to unnamed protein product [Vitis vinifera] (GB:CAO41017.1)	0	0	#DIV/0!	0	1	0	0	1	0	1.02367	0.921268
AT1G27150	protein_coding	binding		similar to binding [Arabidopsis thaliana] (TAIR:AT1G27110.1); similar to unnamed protein product [Vitis vinifera] (GB:CAO41008.1); contains InterPro domain Tetratricopeptide-like helical; (InterPro:IPR011990)	0	0	#DIV/0!	0	1	0	0	1	0	1.00139	0.993344
AT1G27170	protein_coding	ATP binding / protein binding / transmembrane receptor		similar to disease resistance protein (TIR-NBS-LRR class), putative [Arabidopsis thaliana] (TAIR:AT1G27180.1); similar to hypothetical protein [Vitis vinifera] (GB:CAN69078.1); similar to unnamed protein product [Vitis vinifera] (GB:CAO40986.1); similar t	0	0	#DIV/0!	0	1	0	0	1	0	0.776675	0.270554
AT1G27330	protein_coding			similar to unknown protein [Arabidopsis thaliana] (TAIR:AT1G27350.1); similar to membrane protein [Brassica juncea] (GB:AAT38818.1); contains InterPro domain Ribosome associated membrane RAMP4 (InterPro:IPR010580)	0	1	0	0	0	#DIV/0!	0	1	0	0.670272	0.199424
AT1G27390	protein_coding	TOM20-2 (TRANSLOCASE OUTER MEMBRANE 20-2)	Form of TOM20, which is a component of the TOM complex, involved in transport of nuclear-encoded mitochondrial proteins	Identical to Mitochondrial import receptor subunit TOM20-2 (TOM20-2) [Arabidopsis Thaliana] (GB:P82873;GB:Q9FZJ6); similar to TOM20-3 (TRANSLOCASE OF OUTER MEMBRANE 20 KDA SUBUNIT 3), P-P-bond-hydrolysis-driven protein transmembrane transporter [Arabidop	0	0	#DIV/0!	0	2	0	0	2	0	1.05195	0.681639
AT1G27435	protein_coding			similar to unnamed protein product [Vitis vinifera] (GB:CAO70078.1)	0	1	0	0	0	#DIV/0!	0	1	0	0.875835	0.515482
AT1G27630	protein_coding	CYCT1;3; cyclin-dependent protein kinase		Identical to Cyclin-T1-3 (CYCT1-3) [Arabidopsis Thaliana] (GB:Q8LBC0;GB:Q9SFZ4;GB:Q9SFZ5;GB:Q9SXC3); similar to cyclin family protein [Arabidopsis thaliana] (TAIR:AT5G45190.1); similar to unnamed protein product [Vitis vinifera] (GB:CAO61109.1); contains	0	0	#DIV/0!	0	1	0	0	1	0	0.814897	0.692226
AT1G27930	protein_coding			similar to unknown protein [Arabidopsis thaliana] (TAIR:AT1G67330.1); similar to unknown [Populus trichocarpa] (GB:ABK93495.1); contains InterPro domain Protein of unknown function DUF579, plant (InterPro:IPR006514)	0	0	#DIV/0!	0	2	0	0	2	0	1.17071	0.38883
AT1G28190	protein_coding			similar to unknown protein [Arabidopsis thaliana] (TAIR:AT5G12340.1); similar to unknown [Picea sitchensis] (GB:ABK21062.1)	0	0	#DIV/0!	0	2	0	0	3	0	1.10147	0.0107653
AT1G28200	protein_coding	FIP1 (FH INTERACTING PROTEIN 1)	VirF-interacting protein FIP1	Identical to GEM-like protein 1 (FIP1) [Arabidopsis Thaliana] (GB:Q9SE96); similar to GEM [Arabidopsis thaliana] (TAIR:AT2G22475.1); similar to unnamed protein product [Vitis vinifera] (GB:CAO61640.1); contains InterPro domain GRAM (InterPro:IPR004182)	0	1	0	0	1	0	0	2	0	0.986281	0.934725
AT1G28320	protein_coding	DEG15; endopeptidase	Mutants in this gene are defective in the processing of pre-glyoxysomal malate dehydrogenase (pre-gMDH) to gMDH.	similar to DEGP1 (DEGP PROTEASE 1), serine-type peptidase [Arabidopsis thaliana] (TAIR:AT3G27925.1); similar to putative protease/hydrolase [Lycopersicon esculentum] (GB:ABH07902.1); similar to unnamed protein product [Vitis vinifera] (GB:CAO66416.1); con	0	0	#DIV/0!	0	1	0	0	1	0	0.981398	0.842222
AT1G28760	protein_coding			similar to unknown protein [Arabidopsis thaliana] (TAIR:AT5G67610.1); similar to unknown protein [Arabidopsis thaliana] (TAIR:AT5G67610.2); similar to unnamed protein product [Vitis vinifera] (GB:CAO18262.1)	0	1	0	0	0	#DIV/0!	0	1	0	1.09342	0.299851
AT1G29230	protein_coding	CIPK18 (SNF1-RELATED PROTEIN KINASE 3.20); kinase	Encodes a member of the SNF1-related kinase (SnRK) gene family (SnRK3.20), which has also been reported as a member of the CBL-interacting protein kinases (CIPK18).	similar to CIPK13 (SNF1-RELATED PROTEIN KINASE 3.7), kinase [Arabidopsis thaliana] (TAIR:AT2G34180.1); similar to putative serine-threonine kinase [Gossypium hirsutum] (GB:AAT64036.1); similar to CBL-interacting protein kinase 19 [Populus trichocarpa] (GB	0	0	#DIV/0!	0	1	0	0	1	0	1.04724	0.925197
AT1G29310	protein_coding	protein transport protein sec61, putative		similar to protein transport protein sec61, putative [Arabidopsis thaliana] (TAIR:AT1G78720.1); similar to protein transport protein sec61, putative [Arabidopsis thaliana] (TAIR:AT2G34250.1); similar to protein transport protein sec61, putative [Arabidops	0	0	#DIV/0!	0	4	0	0	4	0	0.637021	0.057444
AT1G29410	protein_coding	PAI3 (PHOSPHORIBOSYLANTHRANILATE ISOMERASE 3); phosphoribosylanthranilate isomerase	Encodes phosphoribosylanthranilate isomerase which catalyzes the third step in tryptophan biosynthesis.	similar to PAI1 (PHOSPHORIBOSYLANTHRANILATE ISOMERASE 1) [Arabidopsis thaliana] (TAIR:AT1G07780.4); similar to unnamed protein product [Vitis vinifera] (GB:CAO41379.1); contains InterPro domain Ribulose-phosphate binding barrel; (InterPro:IPR011060); cont	0	0	#DIV/0!	0	1	0	0	1	0	0.70985	0.0110272
AT1G29418	protein_coding	unknown protein			0	0	#DIV/0!	0	1	0	0	1	0
AT1G29960	protein_coding	AGL64; peptidase		similar to signal peptidase-related [Arabidopsis thaliana] (TAIR:AT1G23465.1); similar to unknown [Populus trichocarpa] (GB:ABK93323.1); contains InterPro domain Peptidase S26A, signal peptidase I; (InterPro:IPR000223); contains InterPro domain Peptidase	0	1	0	0	0	#DIV/0!	0	1	0	1.14109	0.46823
AT1G30050	protein_coding			similar to unknown protein [Arabidopsis thaliana] (TAIR:AT5G01970.1); similar to unnamed protein product [Vitis vinifera] (GB:CAO45367.1)	0	0	#DIV/0!	0	1	0	0	1	0
AT1G30130	protein_coding			similar to hypothetical protein [Brassica oleracea var. alboglabra] (GB:CAA99112.1); contains InterPro domain Protein of unknown function DUF1365 (InterPro:IPR010775)	0	0	#DIV/0!	0	1	0	0	1	0	1.08488	0.749433
AT1G30220	protein_coding	ATINT2 (INOSITOL TRANSPORTER 2); carbohydrate transmembrane transporter/ sugar:hydrogen ion symporter		Identical to Probable inositol transporter 2 (INT2) [Arabidopsis Thaliana] (GB:Q9C757); similar to ATINT4 (INOSITOL TRANSPORTER 4), carbohydrate transmembrane transporter/ myo-inositol:hydrogen symporter/ sugar:hydrogen ion symporter [Arabidopsis thaliana	0	1	0	0	0	#DIV/0!	0	1	0	1.37919	0.220523
AT1G30230	protein_coding	elongation factor 1-beta / EF-1-beta		Identical to Elongation factor 1-delta 1 [Arabidopsis Thaliana] (GB:P48006;GB:Q0WWW7); similar to elongation factor 1-beta, putative / EF-1-beta, putative [Arabidopsis thaliana] (TAIR:AT2G18110.1); similar to putative elongation factor 1-beta [Brassica r	0	0	#DIV/0!	0	1	0	0	1	0
AT1G30630	protein_coding	coatomer protein epsilon subunit family protein / COPE family protein		Identical to Coatomer subunit epsilon-1 [Arabidopsis Thaliana] (GB:Q9SA78;GB:Q8LB21); similar to coatomer protein epsilon subunit family protein / COPE family protein [Arabidopsis thaliana] (TAIR:AT2G34840.1); similar to epsilon1-COP [Glycine max] (GB:BA	0	1	0	0	1	0	0	2	0	0.822354	0.0712005
AT1G30740	protein_coding	FAD-binding domain-containing protein		similar to ATSEC1A, electron carrier [Arabidopsis thaliana] (TAIR:AT1G01980.1); similar to unnamed protein product [Vitis vinifera] (GB:CAO42591.1); contains InterPro domain FAD-binding, type 2; (InterPro:IPR016166); contains InterPro domain FAD linked ox	0	0	#DIV/0!	0	1	0	0	1	0	0.962999	0.801599
AT1G30810	protein_coding	transcription factor jumonji (jmj) family protein / zinc finger (C5HC2 type) family protein		similar to MEE27 (maternal effect embryo arrest 27), transcription factor [Arabidopsis thaliana] (TAIR:AT2G34880.1); similar to unnamed protein product [Vitis vinifera] (GB:CAO46776.1); contains InterPro domain FY-rich, C-terminal; (InterPro:IPR003889); c	0	1	0	0	0	#DIV/0!	0	1	0	1.09164	0.38665
AT1G30970	protein_coding	SUF4 (SUPPRESSOR OF FRIGIDA4); DNA binding / protein heterodimerization/ protein homodimerization/ transcription factor	Encodes SUF4 (SUPPRESSOR of FRI 4), a putative zinc-finger-containing transcription factor that is required for delayed flowering in winter-annual Arabidopsis. suf4 mutations strongly suppress the late-flowering phenotype of FRI (FRIGIDA) mutants. suf4	similar to late embryogenesis abundant protein-related / LEA protein-related [Arabidopsis thaliana] (TAIR:AT3G19430.1); similar to unnamed protein product [Vitis vinifera] (GB:CAO41935.1); contains InterPro domain Zinc finger, C2H2-like; (InterPro:IPR0158	0	0	#DIV/0!	0	2	0	0	2	0	0.864758	0.0718616
AT1G31280	protein_coding	AGO2 (ARGONAUTE 2); nucleic acid binding	An Argonaute gene	similar to PAZ domain-containing protein / piwi domain-containing protein [Arabidopsis thaliana] (TAIR:AT1G31290.1); similar to hypothetical protein [Vitis vinifera] (GB:CAN62291.1); similar to hypothetical protein [Vitis vinifera] (GB:CAN66699.1); simila	0	1	0	0	0	#DIV/0!	0	1	0	0.934577	0.400438
AT1G31410	protein_coding	putrescine-binding periplasmic protein-related		similar to unnamed protein product [Vitis vinifera] (GB:CAO70776.1); contains InterPro domain Bacterial periplasmic spermidine/putrescine-binding protein; (InterPro:IPR001188)	0	0	#DIV/0!	0	1	0	0	1	0	1.07815	0.625707
AT1G31910	protein_coding	GHMP kinase family protein		similar to phosphomevalonate kinase [Hevea brasiliensis] (GB:AAL18926.1); contains InterPro domain Ribosomal protein S5 domain 2-type fold (InterPro:IPR014721); contains InterPro domain Phosphomevalonate kinase, ERG8 (InterPro:IPR016005); contains InterP	0	0	#DIV/0!	0	1	0	0	1	0	1.10512	0.399065
AT1G31940	protein_coding			similar to unknown protein [Arabidopsis thaliana] (TAIR:AT2G35585.1); similar to hypothetical protein [Vitis vinifera] (GB:CAN79460.1)	0	0	#DIV/0!	0	1	0	0	1	0	0.858364	0.16098
AT1G32060	protein_coding	PRK (PHOSPHORIBULOKINASE); ATP binding / phosphoribulokinase/ protein binding		Identical to Phosphoribulokinase, chloroplast precursor [Arabidopsis Thaliana] (GB:P25697); similar to uracil phosphoribosyltransferase, putative / UMP pyrophosphorylase, putative / UPRTase, putative [Arabidopsis thaliana] (TAIR:AT3G27440.1); similar to	0	0	#DIV/0!	0	2	0	0	2	0	1.24077	0.51063
AT1G32170	protein_coding	XTR4 (XYLOGLUCAN ENDOTRANSGLYCOSYLASE 4); hydrolase, acting on glycosyl bonds	xyloglucan endotransglycosylase-related protein (XTR4)	Identical to Probable xyloglucan endotransglucosylase/hydrolase protein 30 precursor (XTH30) [Arabidopsis Thaliana] (GB:Q38908;GB:Q8LDA9;GB:Q9FVR2); similar to xyloglucan:xyloglucosyl transferase, putative / xyloglucan endotransglycosylase, putative / en	0	1	0	0	1	0	0	2	0	0.999943	0.99978
AT1G32360	protein_coding	zinc finger (CCCH-type) family protein		similar to zinc finger (CCCH-type) family protein [Arabidopsis thaliana] (TAIR:AT2G35430.1); similar to hypothetical protein OsI_026903 [Oryza sativa (indica cultivar-group)] (GB:EAZ05671.1); contains InterPro domain Zinc finger, CCCH-type; (InterPro:IPR0	0	1	0	0	0	#DIV/0!	0	1	0	1.01275	0.903135
AT1G32410	protein_coding	vacuolar protein sorting 55 family protein / VPS55 family protein		similar to vacuolar protein sorting 55 family protein / VPS55 family protein [Arabidopsis thaliana] (TAIR:AT3G11530.2); similar to hypothetical protein OsI_009141 [Oryza sativa (indica cultivar-group)] (GB:EAY87908.1); contains InterPro domain Vacuolar pr	0	0	#DIV/0!	0	1	0	0	1	0	1.0375	0.586808
AT1G09935	protein_coding	phosphoglycerate/bisphosphoglycerate mutase family protein		similar to unknown protein [Arabidopsis thaliana] (TAIR:AT1G58280.1); similar to unnamed protein product [Vitis vinifera] (GB:CAO67833.1); contains InterPro domain Phosphoglycerate mutase (InterPro:IPR013078)	100	109	0.917431	41	0	#DIV/0!	1	113	0.00884956
AT1G32520	protein_coding			similar to unnamed protein product [Vitis vinifera] (GB:CAO63428.1)	0	0	#DIV/0!	0	1	0	0	1	0	1.42451	0.176416
AT1G32750	protein_coding	HAF01 (HISTONE ACETYLTRANSFERASE OF THE TAFII250 FAMILY 1); DNA binding	This gene is predicted to encode a histone acetyltransferase. Five lines with RNAi constructs directed against HAF1 grow normally and can produce root calli, but have defects in agrobacterium-mediated transformation.	Identical to Transcription initiation factor TFIID subunit 1-A (HAF1) [Arabidopsis Thaliana] (GB:Q8LRK9;GB:Q9LPI9); similar to HAF2/TAF1/TAF1B (HISTONE ACETYLTRANSFERASE OF THE TAFII250 FAMILY, TBP-ASSOCIATED FACTOR 1B), DNA binding / transcription cofac	0	1	0	0	0	#DIV/0!	0	1	0	0.859967	0.196582
AT1G33020	protein_coding	F-box family protein		Identical to Putative F-box protein At1g33020 [Arabidopsis Thaliana] (GB:Q9MAP1); similar to F-box family protein [Arabidopsis thaliana] (TAIR:AT3G57590.1); similar to hypothetical protein [Vitis vinifera] (GB:CAN60954.1); contains InterPro domain F-box a	0	0	#DIV/0!	0	0	#DIV/0!	0	1	0
AT1G33110	protein_coding	MATE efflux family protein		similar to MATE efflux family protein [Arabidopsis thaliana] (TAIR:AT1G33080.1); similar to MATE efflux family protein [Arabidopsis thaliana] (TAIR:AT1G33090.1); similar to MATE efflux family protein [Arabidopsis thaliana] (TAIR:AT1G33100.1); similar to u	0	0	#DIV/0!	0	1	0	0	1	0	0.98299	0.944572
AT1G33230	protein_coding			similar to unknown protein [Arabidopsis thaliana] (TAIR:AT4G10430.1); similar to unknown protein [Arabidopsis thaliana] (TAIR:AT4G10430.3); similar to unnamed protein product [Vitis vinifera] (GB:CAO62852.1); contains InterPro domain TMPIT-like; (InterPro	0	0	#DIV/0!	0	1	0	0	1	0	1.2042	0.192599
AT1G33270	protein_coding	patatin-related		similar to unknown [Populus trichocarpa] (GB:ABK95138.1); contains InterPro domain Patatin; (InterPro:IPR002641)	0	0	#DIV/0!	0	1	0	0	1	0	0.883965	0.240238
AT1G33430	protein_coding	galactosyltransferase family protein		similar to galactosyltransferase family protein [Arabidopsis thaliana] (TAIR:AT1G32930.1); similar to unnamed protein product [Vitis vinifera] (GB:CAO44502.1); contains InterPro domain Glycosyl transferase, family 31; (InterPro:IPR002659)	0	1	0	0	0	#DIV/0!	0	1	0	1.09493	0.606254
AT1G33780	protein_coding			similar to unknown protein [Arabidopsis thaliana] (TAIR:AT3G29240.2); similar to unknown protein [Arabidopsis thaliana] (TAIR:AT3G29240.1); similar to hypothetical protein [Vitis vinifera] (GB:CAN64828.1); contains InterPro domain Protein of unknown funct	0	0	#DIV/0!	0	1	0	0	1	0	1.04672	0.781588
AT1G34020	protein_coding	transporter-related		similar to transporter-related [Arabidopsis thaliana] (TAIR:AT4G09810.1); similar to unnamed protein product [Vitis vinifera] (GB:CAO43591.1); contains InterPro domain Protein of unknown function DUF250 (InterPro:IPR004853)	0	1	0	0	0	#DIV/0!	0	1	0	0.939426	0.750936
AT1G34120	protein_coding	IP5PI (INOSITOL POLYPHOSPHATE 5-PHOSPHATASE I); inositol-polyphosphate 5-phosphatase	Encodes an inositol polyphosphate 5-phosphatase.	Identical to Type I inositol-1,4,5-trisphosphate 5-phosphatase 1 (IP5P1) [Arabidopsis Thaliana] (GB:Q84MA2;GB:Q0WU22;GB:Q9FUR3;GB:Q9FX20;GB:Q9ZSC4); similar to inositol polyphosphate 5-phosphatase, putative [Arabidopsis thaliana] (TAIR:AT1G71710.1); simi	0	1	0	0	0	#DIV/0!	0	1	0	1.24603	0.00851473
AT1G34130	protein_coding	STT3B (STAUROSPORIN AND TEMPERATURE SENSITIVE 3-LIKE B); oligosaccharyl transferase	Encodes homolog of yeast STT3, a subunit of oligosaccharyltransferase.	similar to STT3A (STAUROSPORIN AND TEMPERATURE SENSITIVE 3-LIKE A), oligosaccharyl transferase [Arabidopsis thaliana] (TAIR:AT5G19690.1); similar to unnamed protein product [Vitis vinifera] (GB:CAO48475.1); similar to oligosaccharyl transferase, STT3 subu	0	0	#DIV/0!	0	1	0	0	1	0	0.805094	0.489364
AT1G34190	protein_coding	ANAC017 (Arabidopsis NAC domain containing protein 17); transcription factor		similar to ANAC016 (Arabidopsis NAC domain containing protein 16), transcription factor [Arabidopsis thaliana] (TAIR:AT1G34180.1); similar to ANAC016 (Arabidopsis NAC domain containing protein 16) [Arabidopsis thaliana] (TAIR:AT1G34180.2); similar to unna	0	0	#DIV/0!	0	2	0	0	2	0	1.17997	0.115472
AT1G34360	protein_coding	translation initiation factor 3 (IF-3) family protein		similar to leucine-rich repeat family protein / extensin family protein [Arabidopsis thaliana] (TAIR:AT3G19020.1); similar to unnamed protein product [Vitis vinifera] (GB:CAO47407.1); contains InterPro domain Initiation factor 3; (InterPro:IPR001288)	0	1	0	0	0	#DIV/0!	0	1	0	0.930696	0.67687
AT1G35190	protein_coding	oxidoreductase, 2OG-Fe(II) oxygenase family protein		similar to oxidoreductase, acting on paired donors, with incorporation or reduction of molecular oxygen, 2-oxoglutarate as one donor, and incorporation of one atom each of oxygen into both donors [Arabidopsis thaliana] (TAIR:AT3G46490.1); similar to unnam	0	1	0	0	0	#DIV/0!	0	1	0	0.943284	0.700536
AT1G35470	protein_coding	SPla/RYanodine receptor (SPRY) domain-containing protein		similar to SPla/RYanodine receptor (SPRY) domain-containing protein [Arabidopsis thaliana] (TAIR:AT4G09340.1); similar to ranBPM-like [Oryza sativa (japonica cultivar-group)] (GB:BAD15463.1); contains InterPro domain CT11-RanBPM (InterPro:IPR013144); cont	0	0	#DIV/0!	0	1	0	0	1	0	1.09685	0.726043
AT1G35490	protein_coding	bZIP family transcription factor		similar to bZIP family transcription factor [Arabidopsis thaliana] (TAIR:AT1G58110.2); similar to bZIP family transcription factor [Arabidopsis thaliana] (TAIR:AT1G58110.1); similar to unknown [Populus trichocarpa] (GB:ABK95886.1)	0	0	#DIV/0!	0	1	0	0	1	0	0.759464	0.309666
AT1G36160	protein_coding	ACC1 (ACETYL-COENZYME A CARBOXYLASE 1); acetyl-CoA carboxylase	Encodes acetyl-CoA carboxylase. Mutant displays uncoordinated cell divisions which are enhanced by cytokinins. Mutant also has aberrant organization of the apical region in the embryo and abnormal root and shoot development.	similar to ATP binding / biotin binding / catalytic/ ligase [Arabidopsis thaliana] (TAIR:AT1G36180.1); similar to acetyl-CoA carboxylase [Medicago sativa] (GB:AAB42144.1); similar to acetyl-CoA carboxylase [Brassica napus] (GB:CAC19875.1); similar to acet	0	1	0	0	2	0	0	3	0	1.07183	0.677006
AT1G36970	protein_coding			similar to unknown protein [Arabidopsis thaliana] (TAIR:AT1G31150.1); contains InterPro domain Region of unknown function DUF1985 (InterPro:IPR015410)	0	1	0	0	0	#DIV/0!	0	1	0	1.0346	0.700627
AT1G36980	protein_coding			similar to unnamed protein product [Vitis vinifera] (GB:CAO61796.1); contains InterPro domain Protein of unknown function UPF0220 (InterPro:IPR007919)	0	1	0	0	0	#DIV/0!	0	1	0	1.20479	0.274552
AT1G38065	protein_coding			similar to unknown protein [Arabidopsis thaliana] (TAIR:AT1G38131.1); similar to unnamed protein product [Vitis vinifera] (GB:CAO61813.1); contains InterPro domain Protein of unknown function DUF246, plant (InterPro:IPR004348)	0	1	0	0	0	#DIV/0!	0	1	0
AT1G43670	protein_coding	fructose-1,6-bisphosphatase, putative / D-fructose-1,6-bisphosphate 1-phosphohydrolase, putative / FBPase, putative		Identical to Fructose-1,6-bisphosphatase, cytosolic [Arabidopsis Thaliana] (GB:Q9MA79); similar to fructose-1,6-bisphosphatase, putative / D-fructose-1,6-bisphosphate 1-phosphohydrolase, putative / FBPase, putative [Arabidopsis thaliana] (TAIR:AT3G54050.	0	0	#DIV/0!	0	2	0	0	2	0	0.906038	0.733684
AT1G43710	protein_coding	EMB1075 (EMBRYO DEFECTIVE 1075); carboxy-lyase		similar to GAD2 (GLUTAMATE DECARBOXYLASE 2), calmodulin binding [Arabidopsis thaliana] (TAIR:AT1G65960.1); similar to GAD2 (GLUTAMATE DECARBOXYLASE 2) [Arabidopsis thaliana] (TAIR:AT1G65960.2); similar to hypothetical protein [Vitis vinifera] (GB:CAN70523	0	0	#DIV/0!	0	1	0	0	1	0	0.975758	0.917907
AT1G43780	protein_coding	SCPL44 (serine carboxypeptidase-like 44); serine carboxypeptidase		Identical to Serine carboxypeptidase-like 44 precursor (SCPL44) [Arabidopsis Thaliana] (GB:Q9MAR8); similar to SCPL41 (serine carboxypeptidase-like 41), serine carboxypeptidase [Arabidopsis thaliana] (TAIR:AT5G42230.1); similar to SCPL42 (serine carboxyp	0	0	#DIV/0!	0	2	0	0	2	0	0.70607	0.140663
AT1G44090	protein_coding	ATGA20OX5 (GIBBERELLIN 20-OXIDASE 5); iron ion binding / oxidoreductase	Encodes a gibberellin 20-oxidase.	similar to YAP169 (GIBBERELLIN 20 OXIDASE 3), gibberellin 20-oxidase [Arabidopsis thaliana] (TAIR:AT5G07200.1); similar to GA 20-oxidase [Paeonia suffruticosa] (GB:ABQ52488.1); contains InterPro domain 2OG-Fe(II) oxygenase (InterPro:IPR005123); contains I	0	1	0	0	0	#DIV/0!	0	1	0	1.07905	0.583737
AT1G44446	protein_coding	CH1 (CHLOROPHYLL B BIOSYNTHESIS); chlorophyllide a oxygenase	Encodes chlorophyllide <i>a</i> oxygenase which converts chlorophyllide <i>a</i> to chlorophyllide <i>b</i> by catalyzing two successive hydroxylations at the 7-methyl group of chlorophyllide <i>a</i> . Mutants are deficient in pigments that associate wi	Identical to Chlorophyllide a oxygenase, chloroplast precursor (CAO) [Arabidopsis Thaliana] (GB:Q9MBA1;GB:Q3ECX2;GB:Q3ECX3;GB:Q9SPF2;GB:Q9XJ37); similar to TIC55 (TRANSLOCON AT THE INNER ENVELOPE MEMBRANE OF CHLOROPLASTS 55), oxidoreductase [Arabidopsis	0	0	#DIV/0!	0	1	0	0	1	0	1.38682	0.0304226
AT1G44750	protein_coding	ATPUP11 (Arabidopsis thaliana purine permease 11); purine transmembrane transporter	Member of a family of proteins related to PUP1, a purine transporter. May be involved in the transport of purine and purine derivatives such as cytokinins, across the plasma membrane.	Identical to Probable purine permease 11 (PUP11) [Arabidopsis Thaliana] (GB:Q9LPF6;GB:Q2V4I7;GB:Q3E7M0); similar to ATPUP13 (Arabidopsis thaliana purine permease 13), purine transmembrane transporter [Arabidopsis thaliana] (TAIR:AT4G08700.1); similar to	0	0	#DIV/0!	0	1	0	0	1	0	0.964967	0.828212
AT1G44835	protein_coding	YbaK/prolyl-tRNA synthetase family protein		similar to unnamed protein product [Vitis vinifera] (GB:CAO61838.1); contains InterPro domain YbaK/aminoacyl-tRNA synthetase associated region (InterPro:IPR007214)	0	0	#DIV/0!	0	1	0	0	1	0	1.00931	0.924995
AT1G44920	protein_coding			similar to unnamed protein product [Vitis vinifera] (GB:CAO61509.1)	0	1	0	0	1	0	0	2	0	1.13544	0.606768
AT1G47260	protein_coding	APFI; carbonate dehydratase	Encodes mitochondrial gamma carbonic anhydrase. Component of the NADH dehydrogenase complex.	similar to GAMMA CA1 (GAMMA CARBONIC ANHYDRASE 1), carbonate dehydratase [Arabidopsis thaliana] (TAIR:AT1G19580.1); similar to unknown [Populus trichocarpa] (GB:ABK95146.1); contains InterPro domain Bacterial transferase hexapeptide repeat; (InterPro:IPR0	0	0	#DIV/0!	0	2	0	0	2	0	0.70604	0.0815099
AT1G47750	protein_coding	PEX11A	member of the peroxin11 (PEX11) gene family, integral to peroxisome membrane, controls peroxisome proliferation.	similar to PEX11B [Arabidopsis thaliana] (TAIR:AT3G47430.1); similar to unnamed protein product [Vitis vinifera] (GB:CAO61205.1); contains InterPro domain Peroxisomal biogenesis factor 11; (InterPro:IPR008733)	0	0	#DIV/0!	0	1	0	0	1	0	0.802483	0.0822208
AT1G48110	protein_coding	ECT7 (evolutionarily conserved C-terminal region 7)		similar to ECT6 (evolutionarily conserved C-terminal region 6) [Arabidopsis thaliana] (TAIR:AT3G17330.1); similar to hypothetical protein [Vitis vinifera] (GB:CAN75753.1); contains InterPro domain YT521-B-like protein (InterPro:IPR007275)	0	0	#DIV/0!	0	1	0	0	1	0	1.02726	0.800283
AT1G48210	protein_coding	serine/threonine protein kinase, putative		similar to serine/threonine protein kinase, putative [Arabidopsis thaliana] (TAIR:AT3G17410.1); similar to Pto kinase interactor 1 [Lycopersicon esculentum] (GB:AAC61805.1); contains InterPro domain Serine/threonine protein kinase; (InterPro:IPR002290); c	0	0	#DIV/0!	0	1	0	0	1	0	0.617463	0.49614
AT1G48420	protein_coding	D-CDES (D-CYSTEINE DESULFHYDRASE); 1-aminocyclopropane-1-carboxylate deaminase/ D-cysteine desulfhydrase/ catalytic	Encodes an enzyme that decomposes D-cysteine into pyruvate, H2S, and NH3. Only D-cysteine but not L-cysteine was converted by D-CDes to pyruvate, H2S, and NH3. Unlike homologous bacterial enzymes, it does not have 1-aminocyclopropane-1-carboxylate deamin	similar to catalytic/ pyridoxal phosphate binding [Arabidopsis thaliana] (TAIR:AT3G26115.1); similar to unknown [Populus trichocarpa] (GB:ABK95965.1); contains InterPro domain Pyridoxal phosphate-dependent enzyme, beta subunit; (InterPro:IPR001926); conta	0	0	#DIV/0!	0	1	0	0	1	0	0.836986	0.33431
AT1G48630	protein_coding	guanine nucleotide-binding family protein / activated protein kinase C receptor, putative / RACK, putative		similar to guanine nucleotide-binding family protein / activated protein kinase C receptor (RACK1) [Arabidopsis thaliana] (TAIR:AT3G18130.1); similar to Guanine nucleotide-binding protein subunit beta-like protein (GB:Q39336); contains InterPro domain WD4	0	0	#DIV/0!	0	1	0	0	1	0	1.1341	0.4439
AT1G49310	protein_coding	unknown protein			0	2	0	0	0	#DIV/0!	0	2	0	0.943412	0.711496
AT1G49360	protein_coding	F-box family protein		Identical to F-box protein At1g49360 [Arabidopsis Thaliana] (GB:Q9XIA2;GB:Q8VZ76); similar to F-box family protein [Arabidopsis thaliana] (TAIR:AT1G57790.1); similar to unnamed protein product [Vitis vinifera] (GB:CAO15899.1); contains InterPro domain Cyc	0	0	#DIV/0!	0	1	0	0	1	0
AT1G49740	protein_coding	phospholipase C		similar to phospholipase C [Arabidopsis thaliana] (TAIR:AT3G19310.1); similar to unnamed protein product [Vitis vinifera] (GB:CAO47830.1); contains InterPro domain Phospholipase C, phosphatidylinositol-specific , X region; (InterPro:IPR000909)	0	1	0	0	0	#DIV/0!	0	1	0	0.483739	0.062468
AT1G49920	protein_coding	zinc finger protein-related		similar to zinc finger protein-related [Arabidopsis thaliana] (TAIR:AT1G64260.1); similar to SWIM zinc finger family protein [Arabidopsis thaliana] (TAIR:AT1G64255.1); similar to hypothetical protein [Vitis vinifera] (GB:CAN74432.1); contains InterPro dom	0	1	0	0	0	#DIV/0!	0	1	0	1.0684	0.504611
AT1G50080	protein_coding			similar to unknown protein [Arabidopsis thaliana] (TAIR:AT1G60720.1); similar to putative AP endonuclease/reverse transcriptase [Brassica napus] (GB:AAM82604.1)	0	1	0	0	0	#DIV/0!	0	1	0	0.956258	0.426504
AT1G50200	protein_coding	ALATS (ALANYL-TRNA SYNTHETASE); ATP binding / alanine-tRNA ligase/ ligase, forming aminoacyl-tRNA and related compounds / nucleic acid binding		Identical to Alanyl-tRNA synthetase, mitochondrial precursor (ALATS) [Arabidopsis Thaliana] (GB:P36428;GB:O04159;GB:Q8GUG2;GB:Q9SX40); similar to EMB1030 (EMBRYO DEFECTIVE 1030), ATP binding / alanine-tRNA ligase/ ligase, forming aminoacyl-tRNA and relat	0	1	0	0	1	0	0	2	0	1.21175	0.0604848
AT1G50320	protein_coding	ATHX (THIOREDOXIN X); thiol-disulfide exchange intermediate	encodes a prokaryotic thioredoxin	Identical to Thioredoxin-X, chloroplast precursor (ATHX) [Arabidopsis Thaliana] (GB:Q8LD49;GB:Q9SEU5;GB:Q9SX49); similar to ATY1 (Arabidopsis thioredoxin y1), thiol-disulfide exchange intermediate [Arabidopsis thaliana] (TAIR:AT1G76760.1); similar to ATY2	0	0	#DIV/0!	0	1	0	0	1	0	1.27686	0.113524
AT1G50450	protein_coding	binding / catalytic		similar to unknown [Nuphar advena] (GB:ABY60455.1); contains InterPro domain NAD(P)-binding; (InterPro:IPR016040); contains InterPro domain Saccharopine dehydrogenase (InterPro:IPR005097)	0	0	#DIV/0!	0	1	0	0	1	0	0.544634	0.00147028
AT1G50570	protein_coding	C2 domain-containing protein		similar to C2 domain-containing protein [Arabidopsis thaliana] (TAIR:AT5G55530.2); similar to C2 domain-containing protein [Arabidopsis thaliana] (TAIR:AT5G55530.1); similar to C2 domain-containing protein [Arabidopsis thaliana] (TAIR:AT5G55530.3); simila	0	0	#DIV/0!	0	1	0	0	1	0	0.956138	0.50459
AT1G51310	protein_coding	tRNA (5-methylaminomethyl-2-thiouridylate)-methyltransferase		similar to unnamed protein product [Vitis vinifera] (GB:CAO21917.1); contains InterPro domain Rossmann-like alpha/beta/alpha sandwich fold (InterPro:IPR014729); contains InterPro domain tRNA (5-methylaminomethyl-2-thiouridylate)-methyltransferase; (InterP	0	0	#DIV/0!	0	1	0	0	1	0	1.17591	0.507204
AT1G51340	protein_coding	MATE efflux family protein		similar to FRD3 (FERRIC REDUCTASE DEFECTIVE 3), antiporter [Arabidopsis thaliana] (TAIR:AT3G08040.1); similar to unnamed protein product [Vitis vinifera] (GB:CAO21912.1); contains InterPro domain Multi antimicrobial extrusion protein MatE; (InterPro:IPR00	0	0	#DIV/0!	0	1	0	0	1	0	1.1546	0.297605
AT1G51520	protein_coding	nucleic acid binding / nucleotide binding		similar to RNA recognition motif (RRM)-containing protein [Arabidopsis thaliana] (TAIR:AT3G21100.2); similar to RNA recognition motif (RRM)-containing protein [Arabidopsis thaliana] (TAIR:AT3G21100.1); similar to unnamed protein product [Vitis vinifera] (	0	0	#DIV/0!	0	1	0	0	1	0	0.902806	0.35851
AT1G51630	protein_coding			similar to unknown protein [Arabidopsis thaliana] (TAIR:AT3G21190.1); similar to unknown [Populus trichocarpa] (GB:ABK93128.1); contains InterPro domain Protein of unknown function DUF246, plant (InterPro:IPR004348)	0	0	#DIV/0!	0	1	0	0	1	0
AT1G11840	protein_coding	ATGLX1 (GLYOXALASE I HOMOLOG); lactoylglutathione lyase	Encodes a glyoxalase I homolog ATGLX1.	similar to lactoylglutathione lyase, putative / glyoxalase I, putative [Arabidopsis thaliana] (TAIR:AT1G67280.1); similar to putative lactoylglutathione lyase [Brassica rapa] (GB:BAF81517.1); contains InterPro domain Glyoxalase/bleomycin resistance protei	37	54	0.685185	1	23	0.0434783	38	78	0.487179	0.889357	0.453816
AT1G51740	protein_coding	SYP81 (SYNTAXIN 81); protein binding	member of SYP8 Gene Family	Identical to Syntaxin-81 (SYP81) [Arabidopsis Thaliana] (GB:P59277;GB:Q84JQ3;GB:Q9C8I2); similar to unnamed protein product [Vitis vinifera] (GB:CAO69038.1); contains InterPro domain t-SNARE; (InterPro:IPR010989)	0	0	#DIV/0!	0	1	0	0	1	0	0.991666	0.921462
AT1G52220	protein_coding			similar to PSAP/PSI-P/PTAC8/TMP14 (THYLAKOID MEMBRANE PHOSPHOPROTEIN OF 14 KDA) [Arabidopsis thaliana] (TAIR:AT2G46820.2); similar to PSAP/PSI-P/PTAC8/TMP14 (THYLAKOID MEMBRANE PHOSPHOPROTEIN OF 14 KDA), DNA binding [Arabidopsis thaliana] (TAIR:AT2G46820.	0	1	0	0	0	#DIV/0!	0	1	0	1.46526	0.194515
AT1G52870	protein_coding	peroxisomal membrane protein-related		similar to peroxisomal membrane protein-related [Arabidopsis thaliana] (TAIR:AT4G03410.2); similar to peroxisomal membrane protein-related [Arabidopsis thaliana] (TAIR:AT4G03410.1); similar to unknown [Populus trichocarpa x Populus deltoides] (GB:ABK96261	0	0	#DIV/0!	0	1	0	0	1	0	0.975172	0.831564
AT1G52890	protein_coding	ANAC019 (Arabidopsis NAC domain containing protein 19); transcription factor	encodes a NAC transcription factor whose expression is induced by drought, high salt, and abscisic acid. This gene binds to ERD1 promoter in vitro.	Identical to NAC domain-containing protein 19 (ANAC) [Arabidopsis Thaliana] (GB:Q9C932); similar to ATNAC3 (ARABIDOPSIS NAC DOMAIN CONTAINING PROTEIN 55), transcription factor [Arabidopsis thaliana] (TAIR:AT3G15500.1); similar to unnamed protein product	0	0	#DIV/0!	0	3	0	0	3	0	0.271623	0.0592627
AT1G53090	protein_coding	SPA4 (SPA1-RELATED 4); signal transducer	Encodes a member of the SPA (suppressor of phyA-105) protein family (SPA1-SPA4). SPA proteins contain an N-terminal serine/threonine kinase-like motif followed by a coiled-coil structure and a C-terminal WD-repeat domain. SPA proteins function redundant	similar to SPA3 (SPA1-RELATED 3), signal transducer [Arabidopsis thaliana] (TAIR:AT3G15354.1); similar to unnamed protein product [Vitis vinifera] (GB:CAO39286.1); similar to unnamed protein product [Vitis vinifera] (GB:CAO69753.1); similar to hypothetica	0	0	#DIV/0!	0	1	0	0	1	0	1.0916	0.734205
AT1G53120	protein_coding	RNA-binding S4 domain-containing protein		similar to unnamed protein product [Vitis vinifera] (GB:CAO39290.1); contains InterPro domain RNA-binding S4; (InterPro:IPR002942)	0	0	#DIV/0!	0	1	0	0	1	0	1.24635	0.150826
AT1G53140	protein_coding	dynamin family protein		similar to ARC5 (ACCUMULATION AND REPLICATION OF CHLOROPLAST 5), GTP binding / GTPase [Arabidopsis thaliana] (TAIR:AT3G19720.1); similar to ARC5 (ACCUMULATION AND REPLICATION OF CHLOROPLAST 5), GTP binding / GTPase [Arabidopsis thaliana] (TAIR:AT3G19720.2	0	1	0	0	0	#DIV/0!	0	1	0	1.18868	0.127791
AT1G53280	protein_coding	DJ-1 family protein		similar to 4-methyl-5(b-hydroxyethyl)-thiazole monophosphate biosynthesis protein, putative [Arabidopsis thaliana] (TAIR:AT3G14990.1); similar to ThiJ-like protein [Brassica rapa subsp. pekinensis] (GB:AAP96742.1); contains InterPro domain DJ-1 (InterPro:	0	0	#DIV/0!	0	2	0	0	2	0	0.942551	0.684187
AT1G53350	protein_coding	disease resistance protein (CC-NBS-LRR class), putative		Identical to Probable disease resistance RPP8-like protein 2 (RPP8L2) [Arabidopsis Thaliana] (GB:Q9MAG6;GB:O64976); similar to RPP8 (RECOGNITION OF PERONOSPORA PARASITICA 8) [Arabidopsis thaliana] (TAIR:AT5G43470.1); similar to RPP8 (RECOGNITION OF PERONO	0	0	#DIV/0!	0	3	0	0	3	0	1.03518	0.703635
AT1G53590	protein_coding	NTMC2T6.1/NTMC2TYPE6.1		Identical to C2 domain-containing protein At1g53590 (NTMC2T6.1) [Arabidopsis Thaliana] (GB:Q93XX4;GB:Q9C8L5;GB:Q9LPH4); similar to NTMC2T6.2/NTMC2TYPE6.2 [Arabidopsis thaliana] (TAIR:AT3G14590.2); similar to NTMC2T6.2/NTMC2TYPE6.2 [Arabidopsis thaliana]	0	1	0	0	0	#DIV/0!	0	1	0	0.92196	0.804317
AT1G53790	protein_coding	F-box family protein		Identical to F-box protein At1g53790 [Arabidopsis Thaliana] (GB:Q0WQM8;GB:Q9SSB3); similar to F-box family protein [Arabidopsis thaliana] (TAIR:AT2G31470.1); similar to hypothetical protein OsJ_019595 [Oryza sativa (japonica cultivar-group)] (GB:EAZ36112.	0	1	0	0	0	#DIV/0!	0	1	0	1.21102	0.634656
AT1G54030	protein_coding	GDSL-motif lipase, putative		similar to ESM1 (EPITHIOSPECIFIER MODIFIER 1), carboxylesterase [Arabidopsis thaliana] (TAIR:AT3G14210.1); similar to myrosinase-associated protein [Brassica napus] (GB:CAA71238.1); contains InterPro domain Lipase, GDSL; (InterPro:IPR001087)	0	0	#DIV/0!	0	1	0	0	1	0	1.18359	0.450234
AT1G54150	protein_coding	zinc finger (C3HC4-type RING finger) family protein		similar to ZCF61, protein binding / zinc ion binding [Arabidopsis thaliana] (TAIR:AT1G59560.1); similar to unnamed protein product [Vitis vinifera] (GB:CAO45619.1); contains InterPro domain Zinc finger, RING-type; (InterPro:IPR001841)	0	0	#DIV/0!	0	1	0	0	1	0	0.958343	0.783061
AT1G54350	protein_coding	ABC transporter family protein		similar to PXA1 (PEROXISOMAL ABC TRANSPORTER 1) [Arabidopsis thaliana] (TAIR:AT4G39850.1); similar to hypothetical protein OsJ_000878 [Oryza sativa (japonica cultivar-group)] (GB:EAZ11053.1); similar to unnamed protein product [Vitis vinifera] (GB:CAO6497	0	1	0	0	0	#DIV/0!	0	1	0	0.921626	0.513671
AT1G54390	protein_coding	PHD finger protein-related		similar to PHD finger family protein [Arabidopsis thaliana] (TAIR:AT3G24010.1); similar to unnamed protein product [Vitis vinifera] (GB:CAO23491.1); similar to hypothetical protein [Vitis vinifera] (GB:CAN71661.1); contains InterPro domain Zinc finger, RI	0	1	0	0	0	#DIV/0!	0	1	0	1.08221	0.771229
AT1G54460	protein_coding			similar to WDL1 (WVD2-LIKE 1) [Arabidopsis thaliana] (TAIR:AT3G04630.2); similar to WDL1 (WVD2-LIKE 1) [Arabidopsis thaliana] (TAIR:AT3G04630.3); similar to unknown [Populus trichocarpa] (GB:ABK95727.1); contains InterPro domain Targeting for Xklp2 (Inter	0	1	0	0	1	0	0	2	0	1.11892	0.60351
AT1G54520	protein_coding			similar to unknown [Populus trichocarpa x Populus deltoides] (GB:ABK96363.1); contains InterPro domain Protein of unknown function DUF1517 (InterPro:IPR010903)	0	1	0	0	0	#DIV/0!	0	1	0	1.21096	0.286753
AT1G54650	protein_coding			similar to unknown protein [Arabidopsis thaliana] (TAIR:AT2G26200.1); similar to unnamed protein product [Vitis vinifera] (GB:CAO65026.1); contains InterPro domain Methyltransferase type 12 (InterPro:IPR013217); contains InterPro domain Methyltransferase,	0	0	#DIV/0!	0	1	0	0	1	0	1.15038	0.587441
AT1G55110	protein_coding	ATIDD7 (ARABIDOPSIS THALIANA INDETERMINATE(ID)-DOMAIN 7); nucleic acid binding / transcription factor/ zinc ion binding		similar to ATIDD11 (ARABIDOPSIS THALIANA INDETERMINATE(ID)-DOMAIN 11), nucleic acid binding / transcription factor/ zinc ion binding [Arabidopsis thaliana] (TAIR:AT3G13810.1); similar to hypothetical protein [Vitis vinifera] (GB:CAN79105.1); contains Inte	0	0	#DIV/0!	0	1	0	0	1	0	0.988393	0.969705
AT1G55260	protein_coding	lipid binding		similar to lipid transfer protein-related [Arabidopsis thaliana] (TAIR:AT2G44300.1); similar to unnamed protein product [Vitis vinifera] (GB:CAO22038.1); contains InterPro domain Plant lipid transfer protein/seed storage/trypsin-alpha amylase inhibitor (I	0	1	0	0	0	#DIV/0!	0	1	0	0.469232	0.0330581
AT1G55520	protein_coding	TBP2 (TATA binding protein 2); DNA binding / RNA polymerase II transcription factor	TATA-box binding protein. Required for basal transcription. Acts facilitating the recruitment of TFIID to the promoter, which together with the RNA polymerase form the preinitiation complex.	Identical to TATA-box-binding protein 2 (TBP2) [Arabidopsis Thaliana] (GB:P28148); similar to TBP1 (TRANSCRIPTION FACTOR IID-1), DNA binding / RNA polymerase II transcription factor [Arabidopsis thaliana] (TAIR:AT3G13445.1); similar to TATA-box-binding p	0	1	0	0	0	#DIV/0!	0	1	0	0.91327	0.712437
AT1G55760	protein_coding	BTB/POZ domain-containing protein		similar to BTB/POZ domain-containing protein [Arabidopsis thaliana] (TAIR:AT1G21780.2); similar to BTB/POZ domain-containing protein [Arabidopsis thaliana] (TAIR:AT1G21780.1); similar to unnamed protein product [Vitis vinifera] (GB:CAO45219.1); contains I	0	0	#DIV/0!	0	1	0	0	1	0	1.11775	0.635129
AT1G55930	protein_coding	CBS domain-containing protein / transporter associated domain-containing protein		similar to CBS domain-containing protein / transporter associated domain-containing protein [Arabidopsis thaliana] (TAIR:AT3G13070.1); similar to predicted protein [Physcomitrella patens subsp. patens] (GB:EDQ82155.1); similar to hypothetical protein [Vit	0	0	#DIV/0!	0	1	0	0	1	0	1.19021	0.478647
AT1G55960	protein_coding			similar to unknown protein [Arabidopsis thaliana] (TAIR:AT3G13062.2); similar to unknown protein [Arabidopsis thaliana] (TAIR:AT3G13062.1); similar to unnamed protein product [Vitis vinifera] (GB:CAO41766.1); contains InterPro domain Lipid-binding START (	0	0	#DIV/0!	0	1	0	0	1	0	1.24445	0.606208
AT1G56130	protein_coding	leucine-rich repeat family protein / protein kinase family protein		similar to leucine-rich repeat family protein / protein kinase family protein [Arabidopsis thaliana] (TAIR:AT1G56145.1); similar to leucine-rich repeat family protein / protein kinase family protein [Arabidopsis thaliana] (TAIR:AT1G56120.1); similar to le	0	1	0	0	0	#DIV/0!	0	1	0
AT1G56210	protein_coding	copper chaperone (CCH)-related		similar to heavy-metal-associated domain-containing protein [Arabidopsis thaliana] (TAIR:AT5G27690.1); similar to hypothetical protein OsJ_016387 [Oryza sativa (japonica cultivar-group)] (GB:EAZ32904.1); similar to hypothetical protein OsI_017809 [Oryza s	0	0	#DIV/0!	0	1	0	0	1	0	1.27117	0.345965
AT1G56300	protein_coding	DNAJ heat shock N-terminal domain-containing protein		similar to DNAJ heat shock N-terminal domain-containing protein [Arabidopsis thaliana] (TAIR:AT1G71000.1); similar to DnaJ-like protein [Glycine max] (GB:AAM23263.1); contains InterPro domain Heat shock protein DnaJ, N-terminal; (InterPro:IPR001623); cont	0	0	#DIV/0!	0	1	0	0	1	0	0.596296	0.432854
AT1G56330	protein_coding	SAR1 (SECRETION-ASSOCIATED RAS); GTP binding	Encodes a small GTP-binding protein implicated in ER to cis-Golgi transport of other proteins. A member of ARF-like GTPase family. A thaliana has 21 members, in two subfamilies, ARF and ARF-like (ARL) GTPases. The protein is found associated to the ER	Identical to GTP-binding protein SAR1B (SAR1B) [Arabidopsis Thaliana] (GB:Q01474); similar to ASAR1 (Arabidopsis thaliana secretion-associated RAS super family 2), GTP binding [Arabidopsis thaliana] (TAIR:AT4G02080.1); similar to GTP-binding protein SAR1B	0	0	#DIV/0!	0	2	0	0	2	0	0.987936	0.946567
AT1G56345	protein_coding	pseudouridine synthase family protein		similar to unnamed protein product [Vitis vinifera] (GB:CAO17441.1); contains InterPro domain Pseudouridine synthase; (InterPro:IPR006145)	0	0	#DIV/0!	0	1	0	0	1	0	1.05778	0.45952
AT1G56590	protein_coding	clathrin adaptor complexes medium subunit family protein		similar to clathrin adaptor complexes medium subunit family protein [Arabidopsis thaliana] (TAIR:AT1G60780.1); similar to unnamed protein product [Vitis vinifera] (GB:CAO17400.1); contains InterPro domain Longin-like; (InterPro:IPR011012); contains InterP	0	0	#DIV/0!	0	2	0	0	4	0	0.936213	0.79927
AT1G56700	protein_coding	pyrrolidone-carboxylate peptidase family protein		similar to pyrrolidone-carboxylate peptidase family protein [Arabidopsis thaliana] (TAIR:AT1G23440.1); similar to unknown [Populus trichocarpa] (GB:ABK95482.1); contains InterPro domain Peptidase C15, pyroglutamyl peptidase I; (InterPro:IPR000816); contai	0	1	0	0	0	#DIV/0!	0	1	0	0.523355	0.00521759
AT1G57600	protein_coding	membrane bound O-acyl transferase (MBOAT) family protein		similar to Os05g0144000 [Oryza sativa (japonica cultivar-group)] (GB:NP_001054621.1); similar to unnamed protein product [Vitis vinifera] (GB:CAO44765.1); contains InterPro domain Membrane bound O-acyl transferase, MBOAT (InterPro:IPR004299)	0	1	0	0	0	#DIV/0!	0	1	0	1.2224	0.178893
AT1G57610	protein_coding			similar to unknown protein [Arabidopsis thaliana] (TAIR:AT1G09575.1); similar to unnamed protein product [Vitis vinifera] (GB:CAO21275.1); contains InterPro domain Protein of unknown function DUF607 (InterPro:IPR006769)	0	0	#DIV/0!	0	1	0	0	1	0
AT1G57620	protein_coding	emp24/gp25L/p24 family protein		similar to emp24/gp25L/p24 family protein [Arabidopsis thaliana] (TAIR:AT1G09580.1); similar to hypothetical protein [Vitis vinifera] (GB:CAN82472.1); contains InterPro domain emp24/gp25L/p24; (InterPro:IPR000348); contains InterPro domain GOLD (InterPro:	0	1	0	0	0	#DIV/0!	0	1	0	1.059	0.775045
AT1G57820	protein_coding	ORTH2/VIM1 (VARIANT IN METHYLATION 1); DNA binding / chromatin binding / double-stranded methylated DNA binding / histone binding / methyl-CpG binding / methyl-CpNpG binding / methyl-CpNpN binding	Encodes a 645-amino acid methylcytosine-binding protein with a PHD domain, two RING finger domains, and an SRA domain that is involved in centromere heterochromatinization. The protein was shown to bind to methylated cytosines of CG, CNG and CNN motifs	similar to VIM2 (VARIANT IN METHYLATION 2), protein binding / zinc ion binding [Arabidopsis thaliana] (TAIR:AT1G66050.1); similar to VIM5 (VARIANT IN METHYLATION 5), protein binding / zinc ion binding [Arabidopsis thaliana] (TAIR:AT1G57800.1); similar to	0	0	#DIV/0!	0	0	#DIV/0!	0	1	0	0.801476	0.167496
AT1G59640	protein_coding	ZCW32 (BIGPETAL, BIGPETALUB); DNA binding / transcription factor	A basic helix-loop-helix encoding gene (BIGPETAL, BPE) involved in the control of petal size. BPE is expressed via two mRNAs derived from an alternative splicing event. The BPEub (AT1G59640.1)transcript is expressed ubiquitously, whereas the BPEp (AT1G596	similar to basic helix-loop-helix (bHLH) family protein [Arabidopsis thaliana] (TAIR:AT5G62610.1); similar to MYC1 [Catharanthus roseus] (GB:AAQ14331.1); contains InterPro domain Basic helix-loop-helix dimerisation region bHLH; (InterPro:IPR001092); conta	0	0	#DIV/0!	0	1	0	0	1	0	0.789381	0.428215
AT1G59840	protein_coding			similar to unnamed protein product [Vitis vinifera] (GB:CAO40980.1)	0	0	#DIV/0!	0	1	0	0	1	0	1.26489	0.285847
AT1G59910	protein_coding	formin homology 2 domain-containing protein / FH2 domain-containing protein		Identical to Formin-like protein 7 (FH7) [Arabidopsis Thaliana] (GB:Q9XIE0); similar to ATFH8 (FORMIN 8), actin binding / actin filament binding / profilin binding [Arabidopsis thaliana] (TAIR:AT1G70140.1); similar to unnamed protein product [Vitis vinif	0	1	0	0	0	#DIV/0!	0	1	0	1.01329	0.942258
AT1G60420	protein_coding	DC1 domain-containing protein		similar to electron carrier [Arabidopsis thaliana] (TAIR:AT4G31240.1); similar to electron carrier [Arabidopsis thaliana] (TAIR:AT4G31240.2); similar to unnamed protein product [Vitis vinifera] (GB:CAO66081.1); similar to unnamed protein product [Vitis vi	0	1	0	0	0	#DIV/0!	0	1	0	0.889091	0.62506
AT1G60610	protein_coding	protein binding / zinc ion binding		similar to protein binding / zinc ion binding [Arabidopsis thaliana] (TAIR:AT1G10650.1); similar to unnamed protein product [Vitis vinifera] (GB:CAO66101.1); contains InterPro domain Zinc finger, RING-type; (InterPro:IPR001841); contains InterPro domain S	0	0	#DIV/0!	0	1	0	0	1	0	1.26272	0.172285
AT1G60810	protein_coding	ACLA-2 (ATP-citrate lyase A-2)	One of the three genes encoding subunit A of the trimeric enzyme ATP Citrate lyase	similar to ACLA-1 (ATP-citrate lyase A-1) [Arabidopsis thaliana] (TAIR:AT1G10670.2); similar to ACLA-3 (ATP-citrate lyase A-3) [Arabidopsis thaliana] (TAIR:AT1G09430.1); similar to ACLA-1 (ATP-citrate lyase A-1) [Arabidopsis thaliana] (TAIR:AT1G10670.1);	0	1	0	0	0	#DIV/0!	0	1	0	1.76044	0.0253259
AT1G60860	protein_coding	ARF GTPase-activating domain-containing protein		similar to SFC (SCARFACE) [Arabidopsis thaliana] (TAIR:AT5G13300.1); similar to AGD4 (ARF-GAP DOMAIN 4), ARF GTPase activator/ protein binding / zinc ion binding [Arabidopsis thaliana] (TAIR:AT1G10870.1); similar to predicted protein [Physcomitrella paten	0	0	#DIV/0!	0	1	0	0	1	0	0.822468	0.489353
AT1G61000	protein_coding			similar to myosin heavy chain-related [Arabidopsis thaliana] (TAIR:AT1G64330.1); similar to unnamed protein product [Vitis vinifera] (GB:CAO24685.1); contains InterPro domain Nuf2; (InterPro:IPR005549)	0	0	#DIV/0!	0	1	0	0	1	0	1.14082	0.356409
AT1G61010	protein_coding	CPSF73-I; protein binding		similar to ATCPSF73-II (CLEAVAGE AND POLYADENYLATION SPECIFICITY FACTOR 73 KDA SUBUNIT-II), catalytic/ protein binding [Arabidopsis thaliana] (TAIR:AT2G01730.1); similar to hypothetical protein OsI_013856 [Oryza sativa (indica cultivar-group)] (GB:EAY9262	0	0	#DIV/0!	0	1	0	0	1	0	1.0833	0.534709
AT1G61730	protein_coding	DNA-binding storekeeper protein-related		similar to transcription regulator [Arabidopsis thaliana] (TAIR:AT4G00390.1); similar to unknown [Populus trichocarpa] (GB:ABK93310.1); contains InterPro domain Protein of unknown function DUF573 (InterPro:IPR007592)	0	0	#DIV/0!	0	2	0	0	2	0	0.76486	0.312986
AT1G61890	protein_coding	MATE efflux family protein		similar to MATE efflux family protein [Arabidopsis thaliana] (TAIR:AT4G21910.2); similar to MATE efflux family protein [Arabidopsis thaliana] (TAIR:AT1G11670.1); similar to MATE efflux family protein [Arabidopsis thaliana] (TAIR:AT3G21690.1); similar to u	0	2	0	0	1	0	0	3	0	1.45047	0.485642
AT1G61970	protein_coding	mitochondrial transcription termination factor-related / mTERF-related		similar to mitochondrial transcription termination factor-related / mTERF-related [Arabidopsis thaliana] (TAIR:AT1G61980.1); similar to unnamed protein product [Vitis vinifera] (GB:CAO40592.1); contains InterPro domain Mitochodrial transcription terminati	0	0	#DIV/0!	0	1	0	0	1	0
AT1G62085	protein_coding	mitochondrial transcription termination factor family protein / mTERF family protein		similar to mitochondrial transcription termination factor family protein / mTERF family protein [Arabidopsis thaliana] (TAIR:AT1G62110.1); similar to unnamed protein product [Vitis vinifera] (GB:CAO40592.1); contains InterPro domain Mitochodrial transcrip	0	0	#DIV/0!	0	1	0	0	1	0
AT1G62340	protein_coding	ALE1 (ABNORMAL LEAF SHAPE 1); subtilase	Subtilisin-like serine protease required for epidermal surface formation in embryos and juvenile plants	similar to SLP3 (Subtilisin-like serine protease 3), subtilase [Arabidopsis thaliana] (TAIR:AT2G19170.1); similar to unnamed protein product [Vitis vinifera] (GB:CAO22726.1); contains InterPro domain Protease-associated PA (InterPro:IPR003137); contains I	0	1	0	0	0	#DIV/0!	0	1	0	1.15943	0.0696473
AT1G62430	protein_coding	ATCDS1 (CDP-diacylglycerol synthase 1); phosphatidate cytidylyltransferase	Encodes a CDP-diacylglycerol synthase, involved in phospholipid biosynthesis.	Identical to Phosphatidate cytidylyltransferase (CDS1) [Arabidopsis Thaliana] (GB:O04928;GB:O48808); similar to phosphatidate cytidylyltransferase, putative / CDP-diglyceride synthetase, putative [Arabidopsis thaliana] (TAIR:AT4G22340.3); similar to phos	0	2	0	0	0	#DIV/0!	0	2	0	0.95947	0.917643
AT1G62480	protein_coding	vacuolar calcium-binding protein-related		contains domain PTHR22683 (PTHR22683)	0	3	0	0	0	#DIV/0!	0	3	0	1.48143	0.503391
AT1G62710	protein_coding	BETA-VPE (vacuolar processing enzyme beta); cysteine-type endopeptidase	Encodes a vacuolar processing enzyme belonging to a novel group of cysteine proteinases that is expressed specifically in seeds and is essential for the proper processing of storage proteins.	Identical to Vacuolar-processing enzyme beta-isozyme precursor [Arabidopsis Thaliana] (GB:Q39044;GB:Q93VS7;GB:Q9SI79); similar to GAMMA-VPE (Vacuolar processing enzyme gamma), cysteine-type endopeptidase [Arabidopsis thaliana] (TAIR:AT4G32940.1); similar	0	1	0	0	0	#DIV/0!	0	1	0	1.09736	0.607098
AT1G62780	protein_coding			similar to hypothetical protein [Vitis vinifera] (GB:CAN83165.1)	0	0	#DIV/0!	0	1	0	0	1	0	1.08341	0.73458
AT1G62940	protein_coding	4-coumarate--CoA ligase family protein / 4-coumaroyl-CoA synthase family protein		Identical to 4-coumarate--CoA ligase-like 1 (4CLL1) [Arabidopsis Thaliana] (GB:Q9LQ12); similar to 4CL2 (4-coumarate:CoA ligase 2), 4-coumarate-CoA ligase [Arabidopsis thaliana] (TAIR:AT3G21240.1); similar to 4-coumarate:CoA ligase-like [Nicotiana sylves	0	0	#DIV/0!	0	2	0	0	2	0	1.09592	0.470235
AT1G62990	protein_coding	KNAT7 (Knotted-like Arabidopsis thaliana); DNA binding / transcription factor	Encodes a homeodomain transcription factor of the Knotted family. May be involved in secondary cell wall biosynthesis.Mutants have moderately irregular xylem development	Identical to Homeobox protein knotted-1-like 7 (KNAT7) [Arabidopsis Thaliana] (GB:Q9FPQ8;GB:Q8GXB5;GB:Q8LG94;GB:Q9LQ05); similar to KNAT3 (KNOTTED1-LIKE HOMEOBOX GENE 3) [Arabidopsis thaliana] (TAIR:AT5G25220.2); similar to KNAT3 (KNOTTED1-LIKE HOMEOBOX	0	0	#DIV/0!	0	1	0	0	1	0	2.11936	0.0273087
AT1G63010	protein_coding	SPX (SYG1/Pho81/XPR1) domain-containing protein		Identical to Uncharacterized membrane protein At1g63010 [Arabidopsis Thaliana] (GB:Q2V4F9;GB:Q94C80;GB:Q9CAP0;GB:Q9LQ03); similar to SPX (SYG1/Pho81/XPR1) domain-containing protein [Arabidopsis thaliana] (TAIR:AT4G11810.1); similar to SPX (SYG1/Pho81/XPR1	0	1	0	0	0	#DIV/0!	0	1	0	0.877167	0.364687
AT1G63090	protein_coding	ATPP2-A11 (Phloem protein 2-A11); carbohydrate binding		Identical to F-box protein PP2-A11 (PP2A11) [Arabidopsis Thaliana] (GB:Q9CAN4;GB:Q84WN6); similar to ATPP2-A12 (PHLOEM PROTEIN 2-A12), carbohydrate binding [Arabidopsis thaliana] (TAIR:AT1G12710.1); similar to unnamed protein product [Vitis vinifera] (GB	0	1	0	0	0	#DIV/0!	0	1	0	0.690828	0.116071
AT1G63105	protein_coding	unknown protein			0	1	0	0	0	#DIV/0!	0	1	0
AT1G63140	protein_coding	O-methyltransferase, putative		similar to O-methyltransferase family 2 protein [Arabidopsis thaliana] (TAIR:AT1G77520.1); similar to putative caffeic acid methyltransferase [Gossypium raimondii] (GB:ABO41834.1); contains InterPro domain Plant methyltransferase dimerisation; (InterPro:I	0	0	#DIV/0!	0	1	0	0	1	0
AT1G63230	protein_coding	pentatricopeptide (PPR) repeat-containing protein		similar to pentatricopeptide (PPR) repeat-containing protein [Arabidopsis thaliana] (TAIR:AT1G63630.1); similar to pentatricopeptide repeat-containing protein [Raphanus sativus] (GB:AAP86199.1); similar to fertility restorer homologue A [Raphanus sativus]	0	0	#DIV/0!	0	1	0	0	1	0
AT1G63290	protein_coding	ribulose-phosphate 3-epimerase, cytosolic, putative / pentose-5-phosphate 3-epimerase, putative		similar to ribulose-phosphate 3-epimerase, cytosolic, putative / pentose-5-phosphate 3-epimerase, putative [Arabidopsis thaliana] (TAIR:AT3G01850.2); similar to ribulose-phosphate 3-epimerase, cytosolic, putative / pentose-5-phosphate 3-epimerase, putativ	0	0	#DIV/0!	0	2	0	0	2	0	1.18023	0.155847
AT1G63690	protein_coding	protease-associated (PA) domain-containing protein		similar to peptidase [Arabidopsis thaliana] (TAIR:AT1G01650.1); similar to unnamed protein product [Vitis vinifera] (GB:CAO39622.1); similar to growth-on protein GRO10 [Euphorbia esula] (GB:AAL14629.1); similar to unnamed protein product [Vitis vinifera]	0	0	#DIV/0!	0	1	0	0	1	0	0.919366	0.826878
AT1G63700	protein_coding	YDA (YODA); kinase	member of MEKK subfamily	similar to MAP3KA (Mitogen-activated protein kinase kinase kinase 3), kinase [Arabidopsis thaliana] (TAIR:AT1G53570.1); similar to MAP3KA (Mitogen-activated protein kinase kinase kinase 3), kinase [Arabidopsis thaliana] (TAIR:AT1G53570.2); similar to MAP3	0	1	0	0	0	#DIV/0!	0	1	0	0.976642	0.890497
AT1G63810	protein_coding			similar to unnamed protein product [Vitis vinifera] (GB:CAO22840.1); similar to Nrap protein, expressed [Oryza sativa (japonica cultivar-group)] (GB:ABA95898.2); similar to hypothetical protein [Vitis vinifera] (GB:CAN72980.1); contains InterPro domain Nr	0	1	0	0	0	#DIV/0!	0	1	0	1.13789	0.466423
AT1G63830	protein_coding	proline-rich family protein		similar to unknown protein [Arabidopsis thaliana] (TAIR:AT5G41390.1); similar to Os03g0123600 [Oryza sativa (japonica cultivar-group)] (GB:NP_001048806.1); similar to unknown [Populus trichocarpa] (GB:ABK94210.1); contains InterPro domain Protein of unkno	0	1	0	0	0	#DIV/0!	0	1	0	0.756756	0.251997
AT1G63900	protein_coding	zinc finger (C3HC4-type RING finger) family protein		similar to ZCF61, protein binding / zinc ion binding [Arabidopsis thaliana] (TAIR:AT1G59560.1); similar to unnamed protein product [Vitis vinifera] (GB:CAO22469.1); contains InterPro domain Zinc finger, RING-type; (InterPro:IPR001841)	0	1	0	0	0	#DIV/0!	0	1	0	1.19341	0.344649
AT1G64230	protein_coding	UBC28; ubiquitin-protein ligase		Identical to SUMO-conjugating enzyme UBC9 (UBC9) [Arabidopsis Thaliana] (GB:P35132;GB:Q42014;GB:Q8RXQ0;GB:Q9FPH9); similar to UBC9 (UBIQUITIN CONJUGATING ENZYME 9), ubiquitin-protein ligase [Arabidopsis thaliana] (TAIR:AT4G27960.1); similar to UBC9 (UBIQ	0	2	0	0	1	0	0	3	0	0.987636	0.926891
AT1G64580	protein_coding	pentatricopeptide (PPR) repeat-containing protein		similar to pentatricopeptide (PPR) repeat-containing protein [Arabidopsis thaliana] (TAIR:AT1G62910.1); similar to hypothetical protein [Brassica rapa] (GB:ABQ50546.1); contains InterPro domain Pentatricopeptide repeat (InterPro:IPR002885)	0	1	0	0	0	#DIV/0!	0	1	0	1.13287	0.172001
AT1G64680	protein_coding			similar to unknown protein [Arabidopsis thaliana] (TAIR:AT1G03055.1); similar to unnamed protein product [Vitis vinifera] (GB:CAO62908.1)	0	1	0	0	0	#DIV/0!	0	1	0	1.10162	0.372813
AT1G64720	protein_coding	CP5	membrane related protein CP5	similar to unknown protein [Arabidopsis thaliana] (TAIR:AT5G54170.1); similar to unnamed protein product [Vitis vinifera] (GB:CAO62888.1); contains InterPro domain Lipid-binding START (InterPro:IPR002913)	0	0	#DIV/0!	0	1	0	0	1	0	1.46625	0.11427
AT1G64820	protein_coding	MATE efflux family protein		similar to MATE efflux family protein [Arabidopsis thaliana] (TAIR:AT1G66780.1); similar to unnamed protein product [Vitis vinifera] (GB:CAO42224.1); contains InterPro domain Multi antimicrobial extrusion protein MatE; (InterPro:IPR002528)	0	1	0	0	0	#DIV/0!	0	1	0	1.19739	0.196275
AT1G65000	protein_coding			similar to unknown protein [Arabidopsis thaliana] (TAIR:AT5G38060.1); similar to unknown protein [Oryza sativa (japonica cultivar-group)] (GB:AAP21387.1)	0	1	0	0	0	#DIV/0!	0	1	0	1.3055	0.224042
AT1G65020	protein_coding			similar to unnamed protein product [Vitis vinifera] (GB:CAO62149.1); contains InterPro domain NERD (InterPro:IPR011528)	0	0	#DIV/0!	0	1	0	0	1	0	1.01856	0.944881
AT1G65070	protein_coding	DNA mismatch repair MutS family protein		similar to DNA mismatch repair MutS family protein [Arabidopsis thaliana] (TAIR:AT5G54090.1); similar to unnamed protein product [Vitis vinifera] (GB:CAO40456.1); contains InterPro domain DNA mismatch repair protein MutS, C-terminal; (InterPro:IPR000432);	0	0	#DIV/0!	0	1	0	0	1	0	1.42637	0.164653
AT1G65220	protein_coding	eIF4-gamma/eIF5/eIF2-epsilon domain-containing protein		similar to eIF4-gamma/eIF5/eIF2-epsilon domain-containing protein [Arabidopsis thaliana] (TAIR:AT5G36230.1); similar to unknown [Populus trichocarpa] (GB:ABK93058.1); similar to unknown [Populus trichocarpa] (GB:ABK94573.1); similar to hypothetical protei	0	1	0	0	1	0	0	2	0	1.05191	0.737083
AT1G65230	protein_coding			similar to hypothetical protein [Vitis vinifera] (GB:CAN76393.1)	0	0	#DIV/0!	0	1	0	0	1	0	1.07421	0.500729
AT1G65320	protein_coding	CBS domain-containing protein		similar to unknown protein [Arabidopsis thaliana] (TAIR:AT5G53750.1); similar to unnamed protein product [Vitis vinifera] (GB:CAO22996.1); contains InterPro domain Cystathionine beta-synthase, core (InterPro:IPR000644)	0	0	#DIV/0!	0	1	0	0	1	0
AT1G65350	protein_coding	UBQ13 (ubiquitin 13)	polyubiquitin gene,Columbia ecotype revealed that the gene contained a 3.9-kb insertion in the coding region from mitochondrial DNA.	similar to UBQ3 (POLYUBIQUITIN 3), protein binding [Arabidopsis thaliana] (TAIR:AT5G03240.3); similar to UBQ3 (POLYUBIQUITIN 3), protein binding [Arabidopsis thaliana] (TAIR:AT5G03240.2); similar to UBQ4 (ubiquitin 4), protein binding [Arabidopsis thalian	0	2	0	0	0	#DIV/0!	0	2	0	0.968728	0.803606
AT1G65580	protein_coding	FRA3 (FRAGILE FIBER3); inositol or phosphatidylinositol phosphatase		Identical to Type II inositol-1,4,5-trisphosphate 5-phosphatase 12 (FRA3) [Arabidopsis Thaliana] (GB:Q84W55;GB:O04475;GB:Q5MK18;GB:Q9XFT1); similar to endonuclease/exonuclease/phosphatase family protein [Arabidopsis thaliana] (TAIR:AT2G43900.1); similar	0	0	#DIV/0!	0	1	0	0	1	0	0.828103	0.257683
AT1G65660	protein_coding	SMP1 (swellmap 1); nucleic acid binding	Encodes a CCHC zinc finger protein that may function as a step II splicing factor. In an epigenetic allele of SMP1 (in which SMP1 and SMP2 mRNA is reduced) organs are smaller and contain fewer cells.	Identical to Pre-mRNA-splicing factor SLU7-A [Arabidopsis Thaliana] (GB:Q9SHY8;GB:O04483;GB:Q84WT4); similar to SMP2 (swellmap 2) [Arabidopsis thaliana] (TAIR:AT4G37120.1); similar to unnamed protein product [Vitis vinifera] (GB:CAO71409.1); similar to pr	0	0	#DIV/0!	0	2	0	0	2	0	0.859461	0.675027
AT1G65840	protein_coding	ATPAO4 (POLYAMINE OXIDASE 4); amine oxidase		similar to ATPAO2 (POLYAMINE OXIDASE 2), amine oxidase [Arabidopsis thaliana] (TAIR:AT2G43020.1); similar to unnamed protein product [Vitis vinifera] (GB:CAO38729.1); similar to OSJNBb0004A17.1 [Oryza sativa (japonica cultivar-group)] (GB:CAE03599.2); sim	0	0	#DIV/0!	0	1	0	0	1	0	0.62749	0.0285482
AT1G65970	protein_coding	TPX2 (THIOREDOXIN-DEPENDENT PEROXIDASE 2); antioxidant	thioredoxin-dependent peroxidase 2	Identical to Peroxiredoxin-2C (PRXIIC) [Arabidopsis Thaliana] (GB:Q9SRZ4); similar to peroxiredoxin type 2, putative [Arabidopsis thaliana] (TAIR:AT1G60740.1); similar to type 2 peroxiredoxin [Brassica rapa subsp. pekinensis] (GB:AAD33602.1); contains In	0	2	0	0	0	#DIV/0!	0	2	0
AT1G65990	protein_coding	type 2 peroxiredoxin-related / thiol specific antioxidant / mal allergen family protein		Identical to Peroxiredoxin-2A (PRXIIA) [Arabidopsis Thaliana] (GB:Q7G959); similar to F-box family protein [Arabidopsis thaliana] (TAIR:AT4G10740.1); similar to type 2 peroxiredoxin [Brassica rapa subsp. pekinensis] (GB:AAD33602.1); contains InterPro dom	0	1	0	0	0	#DIV/0!	0	1	0	1.06704	0.748926
AT1G66120	protein_coding	acyl-activating enzyme 11 (AAE11)		similar to AMP-dependent synthetase and ligase family protein [Arabidopsis thaliana] (TAIR:AT1G68270.1); similar to acyl-activating enzyme 12 (AAE12) [Arabidopsis thaliana] (TAIR:AT1G65890.1); similar to BZO1, benzoate-CoA ligase [Arabidopsis thaliana] (T	0	2	0	0	2	0	0	4	0	1.22243	0.318637
AT1G66680	protein_coding	AR401	unknown function	similar to catalytic [Arabidopsis thaliana] (TAIR:AT3G60910.1); similar to SLL2-S9-protein [Brassica rapa] (GB:BAA77395.1); similar to SLL2 (GB:AAB49423.1); contains InterPro domain Methyltransferase type 12 (InterPro:IPR013217)	0	1	0	0	0	#DIV/0!	0	1	0	1.07852	0.683953
AT1G66900	protein_coding			similar to unknown protein [Arabidopsis thaliana] (TAIR:AT5G38220.1); similar to unknown protein [Arabidopsis thaliana] (TAIR:AT5G38220.3); similar to hypothetical protein [Vitis vinifera] (GB:CAN82502.1); contains domain PTHR12277:SF8 (PTHR12277:SF8); co	0	0	#DIV/0!	0	1	0	0	1	0	1.12447	0.548547
AT1G67050	protein_coding			similar to unknown protein [Arabidopsis thaliana] (TAIR:AT5G38320.1); similar to unknown protein [Arabidopsis thaliana] (TAIR:AT5G38320.2); similar to At1g67050-like protein [Arabidopsis lyrata subsp. petraea] (GB:ABY59212.1)	0	0	#DIV/0!	0	1	0	0	1	0	1.15513	0.470396
AT1G67280	protein_coding	lactoylglutathione lyase, putative / glyoxalase I, putative		similar to ATGLX1 (GLYOXALASE I HOMOLOG), lactoylglutathione lyase [Arabidopsis thaliana] (TAIR:AT1G11840.3); similar to ATGLX1 (GLYOXALASE I HOMOLOG), lactoylglutathione lyase [Arabidopsis thaliana] (TAIR:AT1G11840.4); similar to ATGLX1 (GLYOXALASE I HOM	0	1	0	0	0	#DIV/0!	0	1	0	1.1756	0.449277
AT1G67300	protein_coding	hexose transporter, putative		Identical to Probable plastidic glucose transporter 2 [Arabidopsis Thaliana] (GB:Q9FYG3); similar to SGB1, carbohydrate transmembrane transporter/ sugar:hydrogen ion symporter [Arabidopsis thaliana] (TAIR:AT1G79820.2); similar to SGB1, carbohydrate transm	0	1	0	0	0	#DIV/0!	0	1	0	0.892825	0.724706
AT1G67700	protein_coding			similar to unknown [Populus trichocarpa] (GB:ABK95743.1); contains domain PTHR11804:SF2 (PTHR11804:SF2); contains domain PTHR11804 (PTHR11804)	0	1	0	0	0	#DIV/0!	0	1	0	1.14684	0.447164
AT1G67770	protein_coding	TEL2 (TERMINAL EAR1-LIKE 2); RNA binding	Similar to terminal ear1 in Zea mays. A member of mei2-like gene family; phylogenetic analysis revealed that TEL2 belongs to the third clade of mei2-like proteins (TEL clade), with conserved two N-terminal RNA recognition motifs (RRM), in addition to the	similar to TEL1 (TERMINAL EAR1-LIKE 1), RNA binding [Arabidopsis thaliana] (TAIR:AT3G26120.1); similar to unnamed protein product [Vitis vinifera] (GB:CAO42474.1); contains InterPro domain RNA recognition motif 2 (InterPro:IPR007201); contains InterPro do	0	1	0	0	0	#DIV/0!	0	1	0	1.10032	0.575928
AT1G67930	protein_coding	Golgi transport complex protein-related		similar to predicted protein [Physcomitrella patens subsp. patens] (GB:EDQ63146.1); similar to hypothetical protein OsI_019067 [Oryza sativa (indica cultivar-group)] (GB:EAY97834.1); similar to predicted protein [Physcomitrella patens subsp. patens] (GB:E	0	0	#DIV/0!	0	1	0	0	1	0	0.810798	0.171894
AT1G68010	protein_coding	HPR (HYDROXYPYRUVATE REDUCTASE); glycerate dehydrogenase/ poly(U) binding	Encodes hydroxypyruvate reductase.	similar to PGDH (3-PHOSPHOGLYCERATE DEHYDROGENASE), phosphoglycerate dehydrogenase [Arabidopsis thaliana] (TAIR:AT1G17745.1); similar to EDA9 (embryo sac development arrest 9), NAD binding / amino acid binding / binding / catalytic/ cofactor binding / oxi	0	0	#DIV/0!	0	1	0	0	1	0	0.506391	0.00272341
AT1G68160	protein_coding			similar to unknown protein [Arabidopsis thaliana] (TAIR:AT1G10820.1); similar to unknown protein [Arabidopsis thaliana] (TAIR:AT1G10820.2); similar to unnamed protein product [Vitis vinifera] (GB:CAO15416.1)	0	0	#DIV/0!	0	1	0	0	1	0	0.925032	0.223173
AT1G68580	protein_coding	agenet domain-containing protein / bromo-adjacent homology (BAH) domain-containing protein		similar to agenet domain-containing protein / bromo-adjacent homology (BAH) domain-containing protein [Arabidopsis thaliana] (TAIR:AT5G55600.1); similar to agenet domain-containing protein / bromo-adjacent homology (BAH) domain-containing protein [Arabido	0	0	#DIV/0!	0	1	0	0	1	0	0.832502	0.245739
AT1G69010	protein_coding	BIM2 (BES1-INTERACTING MYC-LIKE PROTEIN 2); DNA binding / transcription factor		Identical to Putative transcription factor BIM2 (BIM2) [Arabidopsis Thaliana] (GB:Q9CAA4;GB:Q8LC47;GB:Q8RXV7); similar to BIM1 (BES1-interacting Myc-like protein 1), DNA binding / transcription factor [Arabidopsis thaliana] (TAIR:AT5G08130.1); similar to	0	0	#DIV/0!	0	1	0	0	1	0	0.870422	0.119476
AT1G69030	protein_coding			similar to BSD domain-containing protein [Arabidopsis thaliana] (TAIR:AT1G26300.1); similar to hypothetical protein [Vitis vinifera] (GB:CAN73547.1); contains InterPro domain BSD (InterPro:IPR005607)	0	0	#DIV/0!	0	1	0	0	1	0	0.82545	0.184666
AT1G69410	protein_coding	eukaryotic translation initiation factor 5A, putative / eIF-5A, putative		Identical to Eukaryotic translation initiation factor 5A-3 [Arabidopsis Thaliana] (GB:Q9C505;GB:Q94JU4); similar to EIF-5A (eukaryotic translation initiation factor 5A-1), translation initiation factor [Arabidopsis thaliana] (TAIR:AT1G13950.1); similar t	0	0	#DIV/0!	0	1	0	0	1	0	0.879729	0.487148
AT1G69460	protein_coding	emp24/gp25L/p24 family protein		similar to emp24/gp25L/p24 family protein [Arabidopsis thaliana] (TAIR:AT1G26690.1); similar to unknown [Populus trichocarpa] (GB:ABK93105.1); contains InterPro domain emp24/gp25L/p24; (InterPro:IPR000348); contains InterPro domain GOLD (InterPro:IPR00903	0	0	#DIV/0!	0	1	0	0	1	0
AT1G69570	protein_coding	Dof-type zinc finger domain-containing protein		Identical to Dof zinc finger protein DOF1.10 (DOF1.10) [Arabidopsis Thaliana] (GB:Q9SEZ3;GB:O81601); similar to Dof-type zinc finger domain-containing protein [Arabidopsis thaliana] (TAIR:AT1G26790.1); similar to unnamed protein product [Vitis vinifera]	0	0	#DIV/0!	0	1	0	0	1	0	1.94694	0.09635
AT1G69588	protein_coding	CLE45 (CLAVATA3/ESR-RELATED 45)	Belongs to a large gene family, called CLE for CLAVATA3/ESR-related, encoding small peptides with conserved carboxyl termini	similar to hypothetical protein [Vitis vinifera] (GB:CAN64769.1)	0	1	0	0	0	#DIV/0!	0	1	0
AT1G69710	protein_coding	zinc finger protein, putative / regulator of chromosome condensation (RCC1) family protein		similar to Ran GTPase binding / chromatin binding / zinc ion binding [Arabidopsis thaliana] (TAIR:AT5G19420.1); similar to zinc finger protein, putative / regulator of chromosome condensation (RCC1) family protein [Arabidopsis thaliana] (TAIR:AT5G42140.1)	0	1	0	0	0	#DIV/0!	0	1	0
AT1G69840	protein_coding	band 7 family protein		similar to band 7 family protein [Arabidopsis thaliana] (TAIR:AT5G62740.1); similar to hypersensitive-induced response protein [Cucumis sativus] (GB:AAQ72788.1); contains InterPro domain Band 7 protein (InterPro:IPR001107)	0	0	#DIV/0!	0	2	0	0	2	0	0.612685	0.0440596
AT1G69850	protein_coding	ATNRT1:2 (NITRATE TRANSPORTER 1:2); calcium ion binding / transporter	Encodes an inducible component of low-affinity nitrate uptake. mRNA found primarily in root hairs and the epidermis of roots.	similar to nitrate transporter, putative [Arabidopsis thaliana] (TAIR:AT1G27040.1); similar to nitrate transporter, putative [Arabidopsis thaliana] (TAIR:AT1G27040.2); similar to unnamed protein product [Vitis vinifera] (GB:CAO41029.1); similar to Os06g05	0	1	0	0	0	#DIV/0!	0	1	0	1.19497	0.3429
AT1G69990	protein_coding	leucine-rich repeat transmembrane protein kinase, putative		similar to leucine-rich repeat transmembrane protein kinase, putative [Arabidopsis thaliana] (TAIR:AT1G27190.1); similar to unnamed protein product [Vitis vinifera] (GB:CAO14859.1); contains InterPro domain Serine/threonine protein kinase; (InterPro:IPR00	0	0	#DIV/0!	0	1	0	0	1	0	1.06117	0.627535
AT1G70200	protein_coding	RNA recognition motif (RRM)-containing protein		similar to unnamed protein product [Vitis vinifera] (GB:CAO40948.1); contains InterPro domain RNA recognition motif, RNP-1; (InterPro:IPR000504)	0	1	0	0	0	#DIV/0!	0	1	0	1.29621	0.0825366
AT1G70290	protein_coding	ATTPS8 (Arabidopsis thaliana trehalose phosphatase/synthase 8); transferase, transferring glycosyl groups	Encodes an enzyme putatively involved in trehalose biosynthesis. Though the protein has both trehalose-6-phosphate synthase (TPS)-like and trehalose-6-phosphate phosphatase (TPP)-like domains, neither activity has been detected in enzymatic assays nor has	similar to ATTPS9 (Arabidopsis thaliana trehalose-phosphatase/synthase 9), transferase, transferring glycosyl groups / trehalose-phosphatase [Arabidopsis thaliana] (TAIR:AT1G23870.1); similar to ATTPS6 (Arabidopsis thaliana trehalose phosphatase/synthase	0	0	#DIV/0!	0	1	0	0	1	0	0.819699	0.0773456
AT1G70340	protein_coding			similar to unknown protein [Arabidopsis thaliana] (TAIR:AT1G23790.1); similar to unnamed protein product [Vitis vinifera] (GB:CAO40888.1); contains InterPro domain Protein of unknown function DUF936, plant (InterPro:IPR010341)	0	1	0	0	0	#DIV/0!	0	1	0
AT1G70370	protein_coding	BURP domain-containing protein / polygalacturonase, putative		Identical to Probable polygalacturonase non-catalytic subunit JP650 precursor (JP650) [Arabidopsis Thaliana] (GB:P92990;GB:O64599;GB:Q8H7B8;GB:Q93ZQ4); similar to JP630, polygalacturonase [Arabidopsis thaliana] (TAIR:AT1G23760.1); similar to BURP domain-	0	1	0	0	0	#DIV/0!	0	1	0	0.542531	0.117796
AT1G70505	protein_coding			similar to unknown protein [Arabidopsis thaliana] (TAIR:AT1G10660.3); similar to unknown protein [Arabidopsis thaliana] (TAIR:AT1G10660.1); similar to unknown protein [Arabidopsis thaliana] (TAIR:AT1G10660.4); similar to unnamed protein product [Vitis vin	0	1	0	0	0	#DIV/0!	0	1	0
AT1G70580	protein_coding	AOAT2 (GLUTAMATE:GLYOXYLATE AMINOTRANSFERASE 2); alanine transaminase	Similar to glutamate-glyoxylate transaminase enzyme encoded by AOAT1	similar to GGT1 (ALANINE-2-OXOGLUTARATE AMINOTRANSFERASE 1) [Arabidopsis thaliana] (TAIR:AT1G23310.2); similar to GGT1 (ALANINE-2-OXOGLUTARATE AMINOTRANSFERASE 1) [Arabidopsis thaliana] (TAIR:AT1G23310.1); similar to AlaT1 [Vitis vinifera] (GB:AAZ43369.1)	0	0	#DIV/0!	0	2	0	0	2	0	1.13788	0.507763
AT1G70620	protein_coding	cyclin-related		similar to unnamed protein product [Vitis vinifera] (GB:CAO16100.1)	0	1	0	0	0	#DIV/0!	0	1	0	1.0934	0.0932147
AT1G70700	protein_coding	JAZ9/TIFY7 (JASMONATE-ZIM-DOMAIN PROTEIN 9)		Identical to Protein TIFY 7 (TIFY7) [Arabidopsis Thaliana] (GB:Q8W4J8;GB:Q0WLN3;GB:Q2V4D4;GB:Q9CAC0); similar to JAZ4/TIFY6A (JASMONATE-ZIM-DOMAIN PROTEIN 4) [Arabidopsis thaliana] (TAIR:AT1G48500.1); similar to JAZ4/TIFY6A (JASMONATE-ZIM-DOMAIN PROTEIN	0	0	#DIV/0!	0	1	0	0	1	0	0.617889	0.011803
AT1G70750	protein_coding			similar to unknown protein [Arabidopsis thaliana] (TAIR:AT5G16720.1); similar to unknown [Populus trichocarpa] (GB:ABK92464.1); similar to Os03g0259900 [Oryza sativa (japonica cultivar-group)] (GB:NP_001049616.1); contains InterPro domain Protein of unkno	0	1	0	0	0	#DIV/0!	0	1	0	1.00919	0.96345
AT1G70770	protein_coding			similar to unknown protein [Arabidopsis thaliana] (TAIR:AT1G23170.1); similar to hypothetical protein [Vitis vinifera] (GB:CAN67931.1); contains domain PTHR13448 (PTHR13448)	0	0	#DIV/0!	0	1	0	0	1	0	0.937844	0.173774
AT1G70780	protein_coding			similar to unknown protein [Arabidopsis thaliana] (TAIR:AT1G23150.1); similar to unnamed protein product [Vitis vinifera] (GB:CAO42314.1)	0	1	0	0	1	0	0	2	0	1.23949	0.45046
AT1G65980	protein_coding	TPX1 (THIOREDOXIN-DEPENDENT PEROXIDASE 1); antioxidant	thioredoxin-dependent peroxidase	Identical to Peroxiredoxin-2B (PRXIIB) [Arabidopsis Thaliana] (GB:Q9XEX2); similar to TPX2 (THIOREDOXIN-DEPENDENT PEROXIDASE 2), antioxidant [Arabidopsis thaliana] (TAIR:AT1G65970.1); similar to type 2 peroxiredoxin [Brassica rapa subsp. pekinensis] (GB:	78	79	0.987342	28	38	0.736842	106	117	0.905983	1.01144	0.7462
AT1G71710	protein_coding	inositol polyphosphate 5-phosphatase, putative		similar to IP5PI (INOSITOL POLYPHOSPHATE 5-PHOSPHATASE I), inositol-polyphosphate 5-phosphatase [Arabidopsis thaliana] (TAIR:AT1G34120.2); similar to inositol-1,4,5-triphosphate-5-phosphatase [Solanum lycopersicum] (GB:ABV90876.1); similar to hypothetical	0	1	0	0	0	#DIV/0!	0	1	0	0.875528	0.184939
AT1G71790	protein_coding	F-actin capping protein beta subunit family protein		Identical to Probable F-actin-capping protein subunit beta [Arabidopsis Thaliana] (GB:Q9M9G7); similar to unnamed protein product [Vitis vinifera] (GB:CAO67546.1); contains InterPro domain F-actin capping protein, beta subunit; (InterPro:IPR001698)	0	0	#DIV/0!	0	1	0	0	1	0	0.951038	0.467794
AT1G71860	protein_coding	PTP1 (PROTEIN TYROSINE PHOSPHATASE 1)	Encodes a protein with tyrosine phosphatase activity that is downregulated in response to cold and upregulated in response to salt stress.	similar to protein tyrosine phosphatase [Fagus sylvatica] (GB:CAJ77612.1); contains InterPro domain Protein-tyrosine phosphatase, receptor/non-receptor type; (InterPro:IPR000242); contains InterPro domain Protein-tyrosine phosphatase; (InterPro:IPR000387)	0	0	#DIV/0!	0	1	0	0	1	0	0.966575	0.898158
AT1G71940	protein_coding			similar to unknown protein [Arabidopsis thaliana] (TAIR:AT4G09580.1); similar to unnamed protein product [Vitis vinifera] (GB:CAO43675.1); contains InterPro domain SNARE associated Golgi protein (InterPro:IPR015414)	0	0	#DIV/0!	0	2	0	0	2	0	1.14887	0.496735
AT1G71980	protein_coding	protease-associated zinc finger (C3HC4-type RING finger) family protein		similar to peptidase/ protein binding / zinc ion binding [Arabidopsis thaliana] (TAIR:AT4G09560.1); similar to unnamed protein product [Vitis vinifera] (GB:CAO15460.1); contains InterPro domain Protease-associated PA (InterPro:IPR003137); contains InterPr	0	0	#DIV/0!	0	1	0	0	1	0	1.17333	0.415484
AT1G73060	protein_coding			similar to unknown protein [Arabidopsis thaliana] (TAIR:AT5G48790.1); similar to unnamed protein product [Vitis vinifera] (GB:CAO49401.1)	0	0	#DIV/0!	0	1	0	0	1	0	1.04246	0.797437
AT1G73130	protein_coding			similar to unknown protein [Arabidopsis thaliana] (TAIR:AT1G17780.2); similar to hypothetical protein [Vitis vinifera] (GB:CAN66610.1); similar to unnamed protein product [Vitis vinifera] (GB:CAO39378.1)	0	0	#DIV/0!	0	1	0	0	1	0	1.11927	0.52116
AT1G73220	protein_coding	ATOCT1 (ARABIDOPSIS THALIANA ORGANIC CATION/CARNITINE TRANSPORTER1); carbohydrate transmembrane transporter/ carnitine transporter/ transporter		similar to ATOCT2 (ARABIDOPSIS THALIANA ORGANIC CATION/CARNITINE TRANSPORTER2), carbohydrate transmembrane transporter/ sugar:hydrogen ion symporter [Arabidopsis thaliana] (TAIR:AT1G79360.1); similar to putative organic cation transport protein [Phaseolus	0	0	#DIV/0!	0	1	0	0	1	0	0.0240065	7.52321e-05
AT1G73230	protein_coding	nascent polypeptide-associated complex (NAC) domain-containing protein		similar to nascent polypeptide-associated complex (NAC) domain-containing protein / BTF3b-like transcription factor, putative [Arabidopsis thaliana] (TAIR:AT1G17880.1); similar to putative transcription factor BTF3-like [Solanum tuberosum] (GB:ABB87130.1)	0	1	0	0	0	#DIV/0!	0	1	0	0.974225	0.625374
AT1G73260	protein_coding	trypsin and protease inhibitor family protein / Kunitz family protein		similar to trypsin and protease inhibitor family protein / Kunitz family protein [Arabidopsis thaliana] (TAIR:AT1G17860.1); similar to trypsin inhibitor propeptide [Brassica oleracea] (GB:AAB68964.1); contains InterPro domain Kunitz inhibitor ST1-like (In	0	1	0	0	0	#DIV/0!	0	1	0	1.08478	0.52067
AT1G73670	protein_coding	ATMPK15 (ARABIDOPSIS THALIANA MAP KINASE 15); MAP kinase/ kinase	member of MAP Kinase	Identical to Mitogen-activated protein kinase 15 (MPK15) [Arabidopsis Thaliana] (GB:Q9C9U4;GB:Q94EY5); similar to ATMPK8 (ARABIDOPSIS THALIANA MAP KINASE 8), MAP kinase [Arabidopsis thaliana] (TAIR:AT1G18150.2); similar to MPK9 (MAP KINASE 9), MAP kinase	0	0	#DIV/0!	0	1	0	0	1	0	1.15023	0.657033
AT1G73820	protein_coding	Ssu72-like family protein		similar to unnamed protein product [Vitis vinifera] (GB:CAO67337.1); contains InterPro domain Ssu72-like protein (InterPro:IPR006811)	0	1	0	0	1	0	0	2	0	0.81784	0.376026
AT1G73840	protein_coding	ESP1 (ENHANCED SILENCING PHENOTYPE 1)	Resembles the CstF64 family of RNA processing factors that are conserved between yeast and mammals. In mammals, CstF64 is a component of the CstF complex which is required for mRNA 3'end formation along with other factors.	similar to cleavage stimulation factor, putative [Arabidopsis thaliana] (TAIR:AT1G71800.1); similar to proline-rich protein precursor [Glycine max] (GB:AAC34889.1); contains domain PTHR23139 (PTHR23139); contains domain PTHR23139:SF13 (PTHR23139:SF13)	0	0	#DIV/0!	0	1	0	0	1	0	1.01992	0.928676
AT1G73960	protein_coding	TAF2 (TBP-ASSOCIATED FACTOR 2); metallopeptidase/ zinc ion binding		similar to unnamed protein product [Vitis vinifera] (GB:CAO68010.1); similar to predicted protein [Physcomitrella patens subsp. patens] (GB:EDQ60124.1); similar to predicted protein [Physcomitrella patens subsp. patens] (GB:EDQ61374.1); contains InterPro	0	0	#DIV/0!	0	1	0	0	1	0	1.3939	0.218912
AT1G74050	protein_coding	60S ribosomal protein L6 (RPL6C)		Identical to 60S ribosomal protein L6-3 (RPL6C) [Arabidopsis Thaliana] (GB:Q9C9C5); similar to 60S ribosomal protein L6 (RPL6B) [Arabidopsis thaliana] (TAIR:AT1G74060.1); similar to unnamed protein product [Vitis vinifera] (GB:CAO15090.1); contains InterP	0	0	#DIV/0!	0	2	0	0	2	0
AT1G74190	protein_coding	leucine-rich repeat family protein		similar to protein binding [Arabidopsis thaliana] (TAIR:AT1G74170.1); similar to leucine-rich repeat family protein [Arabidopsis thaliana] (TAIR:AT2G25470.1); similar to leucine-rich repeat family protein [Arabidopsis thaliana] (TAIR:AT1G74180.1); similar	0	0	#DIV/0!	0	1	0	0	1	0	1.08472	0.0732921
AT1G74320	protein_coding	choline kinase, putative	encodes a choline kinase, whose expression is induced by high salt and mannitol.	similar to choline kinase, putative [Arabidopsis thaliana] (TAIR:AT4G09760.2); similar to choline kinase, putative [Arabidopsis thaliana] (TAIR:AT4G09760.1); similar to unknown [Populus trichocarpa] (GB:ABK94958.1); contains InterPro domain Protein kinase	0	0	#DIV/0!	0	1	0	0	1	0	0.91587	0.755977
AT1G74370	protein_coding	zinc finger (C3HC4-type RING finger) family protein		similar to unknown protein [Arabidopsis thaliana] (TAIR:AT3G29270.2); similar to ubiquitin-protein ligase [Arabidopsis thaliana] (TAIR:AT3G29270.1); similar to unknown [Populus trichocarpa] (GB:ABK92900.1); contains InterPro domain Zinc finger, RING/FYVE/	0	0	#DIV/0!	0	1	0	0	1	0	1.10146	0.168898
AT1G74640	protein_coding			similar to unnamed protein product [Vitis vinifera] (GB:CAO64553.1); contains domain SSF53474 (SSF53474); contains domain G3DSA:3.40.50.1820 (G3DSA:3.40.50.1820)	0	0	#DIV/0!	0	1	0	0	1	0	0.853523	0.435757
AT1G74700	protein_coding	NUZ	Encodes a protein with RNAse Z activity suggesting a role in tRNA processing.	Identical to Nuclear ribonuclease Z (NUZ) [Arabidopsis Thaliana] (GB:Q8LGU7;GB:Q9CA48;GB:Q9SSF6); similar to CPZ [Arabidopsis thaliana] (TAIR:AT2G04530.1); similar to unnamed protein product [Vitis vinifera] (GB:CAO62514.1); contains domain RIBONUCLEASE	0	0	#DIV/0!	0	1	0	0	1	0	1.05156	0.854794
AT1G74730	protein_coding			similar to unknown [Populus trichocarpa x Populus deltoides] (GB:ABK96654.1); contains InterPro domain Protein of unknown function DUF1118 (InterPro:IPR009500)	0	0	#DIV/0!	0	1	0	0	1	0	1.14687	0.272929
AT1G74740	protein_coding	CPK30 (calcium-dependent protein kinase 30); calmodulin-dependent protein kinase/ kinase/ protein kinase	member of Calcium Dependent Protein Kinase	Identical to Calcium-dependent protein kinase 30 (CPK30) [Arabidopsis Thaliana] (GB:Q9SSF8;GB:Q9SBZ3); similar to ATCDPK1, calmodulin-dependent protein kinase/ kinase/ protein kinase [Arabidopsis thaliana] (TAIR:AT1G18890.1); similar to CPK13 (calcium-de	0	0	#DIV/0!	0	1	0	0	1	0	0.676224	0.167907
AT1G75000	protein_coding	GNS1/SUR4 membrane family protein		similar to GNS1/SUR4 membrane family protein [Arabidopsis thaliana] (TAIR:AT4G36830.1); similar to unnamed protein product [Vitis vinifera] (GB:CAO61221.1); contains InterPro domain GNS1/SUR4 membrane protein; (InterPro:IPR002076)	0	0	#DIV/0!	0	1	0	0	1	0
AT1G75100	protein_coding	JAC1 (J-DOMAIN PROTEIN REQUIRED FOR CHLOROPLAST ACCUMULATION RESPONSE 1); heat shock protein binding	Contains a J-domain at the C-terminus which is similar to the J-domain of auxilin, a clathrin-uncoating factor in cow, yeast and worm. Arabidopsis contains 6 other proteins similar to auxilin. Expressed in leaves and stems, but not in roots. Localized in	similar to AUL1 (auxin-like 1 protein), heat shock protein binding [Arabidopsis thaliana] (TAIR:AT1G75310.1); similar to expressed protein [Oryza sativa (japonica cultivar-group)] (GB:ABF94473.1); similar to Os03g0198300 [Oryza sativa (japonica cultivar-g	0	0	#DIV/0!	0	1	0	0	1	0	1.64444	0.160553
AT1G75350	protein_coding	EMB2184 (EMBRYO DEFECTIVE 2184); structural constituent of ribosome		Identical to 50S ribosomal protein L31, chloroplast precursor (RPL31) [Arabidopsis Thaliana] (GB:Q9FWS4); similar to unnamed protein product [Vitis vinifera] (GB:CAO61124.1); similar to hypothetical protein [Vitis vinifera] (GB:CAN64555.1); contains Inte	0	2	0	0	0	#DIV/0!	0	2	0	1.20629	0.0279031
AT1G75510	protein_coding	transcription initiation factor IIF beta subunit (TFIIF-beta) family protein		similar to ATP binding / RNA polymerase II transcription factor/ catalytic [Arabidopsis thaliana] (TAIR:AT3G52270.1); similar to unnamed protein product [Vitis vinifera] (GB:CAO61065.1); contains InterPro domain Winged helix repressor DNA-binding (InterPr	0	0	#DIV/0!	0	1	0	0	1	0	1.04832	0.604795
AT1G75520	protein_coding	SRS5 (SHI-RELATED SEQUENCE 5)	A member of SHI gene family. Arabidopsis thaliana has ten members that encode proteins with a RING finger-like zinc finger motif. Despite being highly divergent in sequence, many of the SHI-related genes are partially redundant in function and synergistic	similar to SRS7 (SHI-RELATED SEQUENCE 7) [Arabidopsis thaliana] (TAIR:AT1G19790.1); similar to SRS7 (SHI-RELATED SEQUENCE 7) [Arabidopsis thaliana] (TAIR:AT1G19790.2); similar to unnamed protein product [Vitis vinifera] (GB:CAO61060.1); contains InterPro	0	0	#DIV/0!	0	1	0	0	1	0	0.870363	0.545245
AT1G75760	protein_coding	ER lumen protein retaining receptor family protein		similar to ER lumen protein retaining receptor family protein [Arabidopsis thaliana] (TAIR:AT1G19970.1); similar to ER lumen protein-retaining receptor-like [Oryza sativa (japonica cultivar-group)] (GB:BAD33333.1); contains InterPro domain ER lumen protei	0	0	#DIV/0!	0	2	0	0	2	0	1.11804	0.202234
AT1G76140	protein_coding	prolyl oligopeptidase		similar to prolyl oligopeptidase, putative / prolyl endopeptidase, putative / post-proline cleaving enzyme, putative [Arabidopsis thaliana] (TAIR:AT1G20380.1); similar to unnamed protein product [Vitis vinifera] (GB:CAO61995.1); similar to hypothetical pr	0	0	#DIV/0!	0	1	0	0	1	0	0.943914	0.696587
AT1G76150	protein_coding	maoC-like dehydratase domain-containing protein		similar to predicted protein [Physcomitrella patens subsp. patens] (GB:EDQ71903.1); similar to Os09g0544900 [Oryza sativa (japonica cultivar-group)] (GB:NP_001063833.1); contains InterPro domain MaoC-like dehydratase; (InterPro:IPR002539); contains InterP	0	0	#DIV/0!	0	1	0	0	1	0	0.864132	0.542513
AT1G76320	protein_coding	FRS4 (FAR1-RELATED SEQUENCE 4); zinc ion binding		similar to FAR1 (FAR-RED IMPAIRED RESPONSE 1) [Arabidopsis thaliana] (TAIR:AT4G15090.1); similar to unnamed protein product [Vitis vinifera] (GB:CAO41786.1); similar to hypothetical protein [Vitis vinifera] (GB:CAN74344.1); similar to unnamed protein prod	0	0	#DIV/0!	0	1	0	0	1	0	0.963049	0.856237
AT1G76500	protein_coding	DNA-binding family protein		similar to ESC (ESCAROLA) [Arabidopsis thaliana] (TAIR:AT1G20900.1); similar to unnamed protein product [Vitis vinifera] (GB:CAO47552.1); contains InterPro domain Predicted AT-hook DNA-binding (InterPro:IPR014476); contains InterPro domain HMG-I and HMG-Y	0	0	#DIV/0!	0	1	0	0	1	0	1.21449	0.333458
AT1G76590	protein_coding	zinc-binding family protein		similar to zinc-binding family protein [Arabidopsis thaliana] (TAIR:AT1G21000.1); similar to unknown [Populus trichocarpa x Populus deltoides] (GB:ABK96587.1); contains InterPro domain Protein of unknown function DUF597 (InterPro:IPR006734)	0	0	#DIV/0!	0	1	0	0	1	0	0.565517	0.196351
AT1G76900	protein_coding	AtTLP1 (TUBBY LIKE PROTEIN 1); phosphoric diester hydrolase/ transcription factor	Member of TLP family	Identical to Tubby-like F-box protein 1 (TULP1) [Arabidopsis Thaliana] (GB:Q9ZP59); similar to AtTLP10 (TUBBY LIKE PROTEIN 10), phosphoric diester hydrolase/ transcription factor [Arabidopsis thaliana] (TAIR:AT1G25280.1); similar to unknown [Populus tric	0	1	0	0	0	#DIV/0!	0	1	0	1.06333	0.701937
AT1G76990	protein_coding	ACR3 (ACT Domain Repeat 3)		similar to ACR4 (ACT REPEAT 4), amino acid binding [Arabidopsis thaliana] (TAIR:AT1G69040.2); similar to ACR4 (ACT REPEAT 4), amino acid binding [Arabidopsis thaliana] (TAIR:AT1G69040.1); similar to hypothetical protein [Vitis vinifera] (GB:CAN73861.1); c	0	1	0	0	1	0	0	2	0	1.06906	0.798311
AT4G11270	protein_coding	transducin family protein / WD-40 repeat family protein		similar to unnamed protein product [Vitis vinifera] (GB:CAO65901.1); contains InterPro domain WD40 repeat-like (InterPro:IPR011046); contains InterPro domain WD40/YVTN repeat-like (InterPro:IPR015943); contains InterPro domain WD40 repeat (InterPro:IPR001	39	66	0.590909	0	0	#DIV/0!	0	66	0	1.0105	0.961634
AT1G77250	protein_coding	PHD finger family protein		similar to MBD9 (METHYL-CPG-BINDING DOMAIN 9), DNA binding [Arabidopsis thaliana] (TAIR:AT3G01460.1); similar to unnamed protein product [Vitis vinifera] (GB:CAO61934.1); contains InterPro domain Zinc finger, RING/FYVE/PHD-type (InterPro:IPR013083); conta	0	0	#DIV/0!	0	1	0	0	1	0	0.961021	0.644418
AT1G77320	protein_coding	MEI1 (MEIOSIS DEFECTIVE 1); transcription coactivator	Mutant is defective in meiosis and produces abnormal microspores. Encodes a BRCT-domain-containing protein that could be specific to the meiotic cell cycle and that plays a crucial role in some DNA repair events independent of SPO11 DSB recombination repa	similar to unknown protein [Arabidopsis thaliana] (TAIR:AT3G43930.2); similar to unknown protein [Arabidopsis thaliana] (TAIR:AT3G43930.1); similar to unnamed protein product [Vitis vinifera] (GB:CAO61918.1); similar to hypothetical protein OsI_034212 [Or	0	0	#DIV/0!	0	1	0	0	1	0
AT1G77510	protein_coding	ATPDIL1-2 (PDI-LIKE 1-2); protein disulfide isomerase	Encodes a protein disulfide isomerase-like (PDIL) protein, a member of a multigene family within the thioredoxin (TRX) superfamily.	Identical to Protein disulfide-isomerase 2 precursor [Arabidopsis Thaliana] (GB:Q9SRG3;GB:Q0WV97); similar to ATPDIL1-1 (PDI-LIKE 1-1), protein disulfide isomerase [Arabidopsis thaliana] (TAIR:AT1G21750.2); similar to ATPDIL1-1 (PDI-LIKE 1-1), protein di	0	1	0	0	1	0	0	2	0	0.182789	0.0690643
AT1G77610	protein_coding	glucose-6-phosphate/phosphate translocator-related		similar to glucose-6-phosphate/phosphate translocator-related [Arabidopsis thaliana] (TAIR:AT1G21870.1); similar to unknown [Populus trichocarpa] (GB:ABK93788.1); contains InterPro domain Protein of unknown function DUF6, transmembrane; (InterPro:IPR00062	0	0	#DIV/0!	0	1	0	0	1	0	0.759771	0.116477
AT1G78050	protein_coding	phosphoglycerate/bisphosphoglycerate mutase family protein		similar to phosphoglycerate/bisphosphoglycerate mutase family protein [Arabidopsis thaliana] (TAIR:AT1G22170.1); similar to unknown [Picea sitchensis] (GB:ABK24588.1); contains InterPro domain Phosphoglycerate mutase (InterPro:IPR013078); contains InterPr	0	0	#DIV/0!	0	1	0	0	1	0	1.57757	0.178668
AT1G78280	protein_coding	transcription factor jumonji (jmjC) domain-containing protein		Identical to F-box protein At1g78280 [Arabidopsis Thaliana] (GB:Q9M9E8); similar to unknown protein [Arabidopsis thaliana] (TAIR:AT5G06550.1); similar to hypothetical protein OsI_011531 [Oryza sativa (indica cultivar-group)] (GB:EAY90298.1); similar to un	0	1	0	0	0	#DIV/0!	0	1	0	0.947688	0.575581
AT1G78370	protein_coding	ATGSTU20 (Arabidopsis thaliana Glutathione S-transferase (class tau) 20); glutathione transferase	Encodes glutathione transferase belonging to the tau class of GSTs. Naming convention according to Wagner et al. (2002).	similar to ATGSTU19 (GLUTATHIONE TRANSFERASE 8), glutathione transferase [Arabidopsis thaliana] (TAIR:AT1G78380.1); similar to glutathione S-transferase [Brassica napus] (GB:ABD36807.1); contains InterPro domain Thioredoxin-like fold (InterPro:IPR012336);	0	2	0	0	1	0	0	3	0	0.231096	0.0201594
AT1G78570	protein_coding	RHM1/ROL1 (RHAMNOSE BIOSYNTHESIS1); UDP-L-rhamnose synthase/ UDP-glucose 4,6-dehydratase/ catalytic	Encodes a UDP-L-Rhamnose synthase involved in the biosynthesis of rhamnose, a major monosaccharide component of pectin. Catalyzes the conversion of UDP-D-Glc to UDP-L-Rha. The dehydrogenase domain of RHM1 was shown to catalyze the conversion of UDP-D-Glc	Identical to Probable rhamnose biosynthetic enzyme 1 (RHM1) [Arabidopsis Thaliana] (GB:Q9SYM5); similar to MUM4 (MUCILAGE-MODIFIED 4), catalytic [Arabidopsis thaliana] (TAIR:AT1G53500.1); similar to RHM3 (RHAMNOSE BIOSYNTHESIS 3), catalytic [Arabidopsis	0	0	#DIV/0!	0	1	0	0	1	0	0.822966	0.178522
AT1G78590	protein_coding	ATNADK-3/NADK3 (NAD(H) kinase 3); NAD+ kinase/ NADH kinase	Encodes a NADH kinase which can synthesize NADPH from NADH; also utilizes NAD+ as substrate although NADH is the preferred substrate.	Identical to NADH kinase (NADK3) [Arabidopsis Thaliana] (GB:Q500Y9;GB:Q9SYM3); similar to unnamed protein product [Vitis vinifera] (GB:CAO39481.1); contains InterPro domain ATP-NAD kinase, PpnK-type, alpha/beta; (InterPro:IPR017438); contains InterPro do	0	0	#DIV/0!	0	1	0	0	1	0
AT1G78620	protein_coding	integral membrane family protein		similar to unknown [Picea sitchensis] (GB:ABK22124.1); similar to Os01g0729100 [Oryza sativa (japonica cultivar-group)] (GB:NP_001044132.1); contains InterPro domain Protein of unknown function DUF92, transmembrane (InterPro:IPR002794)	0	0	#DIV/0!	0	1	0	0	1	0	1.16151	0.371345
AT1G78630	protein_coding	EMB1473 (EMBRYO DEFECTIVE 1473); structural constituent of ribosome		Identical to 50S ribosomal protein L13, chloroplast precursor (RPL13) [Arabidopsis Thaliana] (GB:Q9SYL9); similar to ribosomal protein L13 family protein [Arabidopsis thaliana] (TAIR:AT3G01790.2); similar to ribosomal protein L13 family protein [Arabidop	0	0	#DIV/0!	0	1	0	0	1	0	0.772329	0.235777
AT1G78920	protein_coding	AVP2 (ARABIDOPSIS VACUOLAR H+-PYROPHOSPHATASE 2)	vacuolar-type H+-translocating inorganic pyrophosphatase	Identical to Pyrophosphate-energized membrane proton pump 2 (AVPL1) [Arabidopsis Thaliana] (GB:Q56ZN6;GB:Q9LDJ4;GB:Q9MB70;GB:Q9ZVB1); similar to vacuolar-type H+-translocating inorganic pyrophosphatase, putative [Arabidopsis thaliana] (TAIR:AT1G16780.1);	0	0	#DIV/0!	0	1	0	0	1	0	0.938011	0.600732
AT1G79000	protein_coding	HAC1 (P300/CBP ACETYLTRANSFERASE-RELATED PROTEIN 2 GENE); H3/H4 histone acetyltransferase/ transcription cofactor	Homologous to CREB-binding protein, a co-activator of transcription with histone acetyl-transferase activity. No single prior lysine acetylation is sufficient to block HAC1 acetylation of the H3 or H4 peptides, suggesting that HAC1, HAC5, and HAC12 can	Identical to Histone acetyltransferase HAC1 (HAC1) [Arabidopsis Thaliana] (GB:Q9C5X9;GB:O64548); similar to HAC12 (HISTONE ACETYLTRANSFERASE OF THE CBP FAMILY 12), H3/H4 histone acetyltransferase/ transcription cofactor [Arabidopsis thaliana] (TAIR:AT1G1	0	0	#DIV/0!	0	2	0	0	2	0	1.04454	0.861786
AT1G79270	protein_coding	ECT8 (evolutionarily conserved C-terminal region 8)		similar to ECT6 (evolutionarily conserved C-terminal region 6) [Arabidopsis thaliana] (TAIR:AT3G17330.1); similar to hypothetical protein [Vitis vinifera] (GB:CAN75541.1); contains InterPro domain YT521-B-like protein (InterPro:IPR007275)	0	1	0	0	0	#DIV/0!	0	1	0	1.61077	0.159512
AT1G79320	protein_coding	ATMC6 (METACASPASE 6); caspase		similar to AMC6/ATMC5/ATMCP2B (TYPE-II METACASPASES), caspase/ cysteine-type endopeptidase [Arabidopsis thaliana] (TAIR:AT1G79330.1); similar to latex-abundant protein [Hevea brasiliensis] (GB:AAD13216.1); contains InterPro domain Peptidase C14, caspase c	0	1	0	0	0	#DIV/0!	0	1	0	1.18144	0.186605
AT1G79390	protein_coding			similar to unknown [Populus trichocarpa] (GB:ABK95389.1)	0	0	#DIV/0!	0	1	0	0	1	0	0.876995	0.421071
AT1G79450	protein_coding	LEM3 (ligand-effect modulator 3) family protein / CDC50 family protein		similar to LEM3 (ligand-effect modulator 3) family protein / CDC50 family protein [Arabidopsis thaliana] (TAIR:AT1G16360.1); similar to unnamed protein product [Vitis vinifera] (GB:CAO64944.1); contains InterPro domain Protein of unknown function DUF284,	0	0	#DIV/0!	0	1	0	0	1	0	1.1961	0.601382
AT1G79590	protein_coding	SYP52 (SYNTAXIN OF PLANTS 52)	Encodes one of 24 Arabidopsis syntaxins. Its mRNA has been shown to be expressed.	Identical to Syntaxin-52 (SYP52) [Arabidopsis Thaliana] (GB:Q94KK7;GB:Q9MA16); similar to SYP51 (SYNTAXIN OF PLANTS 51) [Arabidopsis thaliana] (TAIR:AT1G16240.1); similar to SYP51 (SYNTAXIN OF PLANTS 51) [Arabidopsis thaliana] (TAIR:AT1G16240.2); similar	0	0	#DIV/0!	0	1	0	0	1	0	1.00704	0.962026
AT1G79650	protein_coding	RAD23; damaged DNA binding	putative DNA repair protein RAD23	Identical to Putative DNA repair protein RAD23-1 (RAD23-1) [Arabidopsis Thaliana] (GB:Q84L33;GB:Q84L34;GB:Q8LA46;GB:Q94CE9;GB:Q9MA10); similar to DNA repair protein RAD23, putative [Arabidopsis thaliana] (TAIR:AT1G16190.1); similar to Rad23-3Ai [syntheti	0	0	#DIV/0!	0	1	0	0	1	0	1.0186	0.90464
AT1G79660	protein_coding			similar to unknown protein [Arabidopsis thaliana] (TAIR:AT1G16170.1); similar to unnamed protein product [Vitis vinifera] (GB:CAO23158.1)	0	0	#DIV/0!	0	1	0	0	1	0	0.865722	0.241327
AT1G79730	protein_coding	ELF7 (EARLY FLOWERING 7)	Encodes a PAF1 homolog that is involved in the control of flowering time by elevating FLC expression to a level that creates the vernalization-responsive, winter-annual habit. Yeast PAF1 is a component of a five-member complex that associates with RNA po	similar to unnamed protein product [Vitis vinifera] (GB:CAO45818.1); contains InterPro domain RNA polymerase II-associated, Paf1 (InterPro:IPR007133)	0	1	0	0	1	0	0	2	0	1.0013	0.99455
AT1G79790	protein_coding	haloacid dehalogenase-like hydrolase family protein		similar to unnamed protein product [Vitis vinifera] (GB:CAO23006.1); contains InterPro domain Haloacid dehalogenase-like hydrolase; (InterPro:IPR005834); contains InterPro domain HAD-superfamily hydrolase, subfamily IA, variant 3 (InterPro:IPR006402)	0	0	#DIV/0!	0	1	0	0	1	0	1.18815	0.605607
AT1G79810	protein_coding	TED3 (REVERSAL OF THE DET PHENOTYPE); protein binding / zinc ion binding	Dominant suppressor of det1 phenotypes. Encodes a peroxisomal protein essential for Arabidopsis growth. Inserted directly from the cytosol into peroxisomes.	Identical to Peroxisome assembly protein 2 (PEX2) [Arabidopsis Thaliana] (GB:Q9CA86;GB:Q8LFI7;GB:Q9M9Z9); similar to unnamed protein product [Vitis vinifera] (GB:CAO45868.1); contains InterPro domain Pex, N-terminal; (InterPro:IPR006845); contains InterP	0	0	#DIV/0!	0	1	0	0	1	0	0.96597	0.824149
AT1G79950	protein_coding	helicase-related		similar to helicase-related [Arabidopsis thaliana] (TAIR:AT1G20750.1); similar to DEAH helicase isoform 5-like [Oryza sativa (japonica cultivar-group)] (GB:BAD52706.1); similar to Os01g0592900 [Oryza sativa (japonica cultivar-group)] (GB:NP_001043456.1);	0	1	0	0	0	#DIV/0!	0	1	0	1.3976	0.365634
AT1G79990	protein_coding	coatomer protein complex, subunit beta 2 (beta prime), putative		Identical to Coatomer subunit beta'-1 [Arabidopsis Thaliana] (GB:Q9CAA0;GB:Q9SSD5); similar to coatomer protein complex, subunit beta 2 (beta prime), putative [Arabidopsis thaliana] (TAIR:AT3G15980.2); similar to coatomer protein complex, subunit beta 2	0	0	#DIV/0!	0	1	0	0	1	0	0.971802	0.898165
AT1G80120	protein_coding			similar to unknown protein [Arabidopsis thaliana] (TAIR:AT3G15810.1); similar to unknown [Populus trichocarpa] (GB:ABK95691.1); contains InterPro domain Protein of unknown function DUF567 (InterPro:IPR007612)	0	1	0	0	0	#DIV/0!	0	1	0
AT1G80210	protein_coding			similar to mov34 family protein [Arabidopsis thaliana] (TAIR:AT3G06820.2); similar to Os05g0542600 [Oryza sativa (japonica cultivar-group)] (GB:NP_001056196.1); similar to unnamed protein product [Vitis vinifera] (GB:CAO46054.1); contains InterPro domain	0	0	#DIV/0!	0	1	0	0	1	0	1.06544	0.766847
AT1G80290	protein_coding	glycosyltransferase family protein 47	a member of the Glycosyltransferase Family 64 (according to CAZy Database)	similar to EPC1 (ECTOPICALLY PARTING CELLS), transferase, transferring glycosyl groups [Arabidopsis thaliana] (TAIR:AT3G55830.1); similar to hypothetical protein [Vitis vinifera] (GB:CAN68561.1); contains InterPro domain EXTL2, alpha-1,4-N-acetylhexosamin	0	0	#DIV/0!	0	1	0	0	1	0	1.57322	0.169244
AT1G80530	protein_coding	nodulin family protein		similar to nodulin family protein [Arabidopsis thaliana] (TAIR:AT2G16660.1); similar to nodulin-like protein [Poncirus trifoliata] (GB:AAN62343.1); similar to unnamed protein product [Vitis vinifera] (GB:CAO45008.1); contains InterPro domain MFS general s	0	0	#DIV/0!	0	1	0	0	1	0	0.643577	0.182962
AT1G80560	protein_coding	3-isopropylmalate dehydrogenase, chloroplast, putative	The AtIMD2 is one out of 3 genes encoding the enzyme 3-isopropylmalate dehydrogenase involved in leucine biosynthesis in Arabidopsis. Its subcellular location has been targeted to plastids.	Identical to 3-isopropylmalate dehydrogenase 2, chloroplast precursor (IMDH2) [Arabidopsis Thaliana] (GB:P93832;GB:Q540Z4;GB:Q8W4P6); similar to 3-isopropylmalate dehydrogenase, chloroplast, putative [Arabidopsis thaliana] (TAIR:AT5G14200.3); similar to	0	0	#DIV/0!	0	1	0	0	1	0	0.951026	0.755002
AT1G80830	protein_coding	NRAMP1 (NRAMP metal ion transporter 1); manganese ion transmembrane transporter/ metal ion transmembrane transporter	Thought to be involved in iron homeostasis. Induced in leaves in response to iron deficiency. Transgenic plants accumulate toxic levels of iron. Gene complements yeast iron uptake mutants.	Identical to Metal transporter Nramp1 (NRAMP1) [Arabidopsis Thaliana] (GB:Q9SAH8;GB:Q8LCS7;GB:Q9SP94); similar to NRAMP6 (NRAMP metal ion transporter 6), metal ion transmembrane transporter [Arabidopsis thaliana] (TAIR:AT1G15960.1); similar to hypothetic	0	0	#DIV/0!	0	1	0	0	1	0	0.717378	0.189619
AT1G80940	protein_coding			similar to predicted protein [Populus alba x Populus tremula] (GB:AAR14272.1); contains domain PTHR22986:SF13 (PTHR22986:SF13); contains domain PTHR22986 (PTHR22986)	0	0	#DIV/0!	0	1	0	0	1	0	1.19182	0.0150941
AT1G80950	protein_coding	phospholipid/glycerol acyltransferase family protein		similar to calcineurin B subunit-related [Arabidopsis thaliana] (TAIR:AT2G45670.1); similar to unnamed protein product [Vitis vinifera] (GB:CAO61203.1); contains InterPro domain Phospholipid/glycerol acyltransferase; (InterPro:IPR002123)	0	0	#DIV/0!	0	3	0	0	3	0	0.90984	0.253597
AT2G01120	protein_coding	ATORC4/ORC4 (ORIGIN RECOGNITION COMPLEX SUBUNIT 4); protein binding	Origin Recognition Complex subunit 4. Involved in the initiation of DNA replication. Regulated transcriptionally during cell cycle, peaking at G1/S-phase. Target of E2F/DF family of transcription factors. Interacts with all ORC subunits except ORC1b.	similar to unnamed protein product [Vitis vinifera] (GB:CAO42220.1); contains domain PTHR12087 (PTHR12087)	0	1	0	0	0	#DIV/0!	0	1	0	1.03057	0.582446
AT2G01450	protein_coding	ATMPK17 (Arabidopsis thaliana MAP kinase 17); MAP kinase	member of MAP Kinase	Identical to Mitogen-activated protein kinase 17 (MPK17) [Arabidopsis Thaliana] (GB:Q84M93;GB:Q9ZVF9); similar to MPK9 (MAP KINASE 9), MAP kinase [Arabidopsis thaliana] (TAIR:AT3G18040.1); similar to ATMPK15 (ARABIDOPSIS THALIANA MAP KINASE 15), MAP kina	0	0	#DIV/0!	0	1	0	0	1	0	0.86547	0.349399
AT2G01610	protein_coding	invertase/pectin methylesterase inhibitor family protein		similar to pectinesterase inhibitor [Arabidopsis thaliana] (TAIR:AT1G14890.1); similar to hypothetical protein [Vitis vinifera] (GB:CAN63370.1); contains InterPro domain Pectinesterase inhibitor; (InterPro:IPR006501)	0	0	#DIV/0!	0	1	0	0	1	0	1.02234	0.928426
AT2G01650	protein_coding	PUX2 (PLANT UBX DOMAIN-CONTAINING PROTEIN 2); nucleic acid binding / zinc ion binding	encodes a peripheral membrane protein that contains UBX domain and interacts with AtCDC48 in vitro and co-fractionates with membrane-associated but not soluble AtCDC48 in vivo.	similar to unnamed protein product [Vitis vinifera] (GB:CAO42345.1); contains InterPro domain UBX (InterPro:IPR001012); contains InterPro domain PUG (InterPro:IPR006567)	0	0	#DIV/0!	0	1	0	0	1	0	0.953829	0.859766
AT2G01850	protein_coding	EXGT-A3 (endo-xyloglucan transferase A3); hydrolase, acting on glycosyl bonds / xyloglucan:xyloglucosyl transferase	EXGT-A3 has homology to xyloglucan endotransglucosylases/hydrolases (XTHs). Mutants in this gene show a lesion mimic phenotype associated with leaf maturation and a reduction in the number of tertiary veins. Individual tracheary elements in the mutants ar	Identical to Probable xyloglucan endotransglucosylase/hydrolase protein 27 precursor (XTH27) [Arabidopsis Thaliana] (GB:Q8LDS2;GB:O04906;GB:Q9SEB1); similar to XTR2 (XYLOGLUCAN ENDOTRANSGLYCOSYLASE RELATED 2), hydrolase, acting on glycosyl bonds [Arabido	0	0	#DIV/0!	0	1	0	0	1	0	1.04644	0.689898
AT2G01910	protein_coding	ATMAP65-6; microtubule binding	Binds microtubules. Induces a crisscross mesh of microtubules, not bundles. Not involved in microtubule polymerization nor nucleation. Localizes to mitochondria.	similar to unknown protein [Arabidopsis thaliana] (TAIR:AT1G14690.2); similar to unknown protein [Arabidopsis thaliana] (TAIR:AT1G14690.1); similar to hypothetical protein [Vitis vinifera] (GB:CAN64202.1); similar to unnamed protein product [Vitis vinifer	0	0	#DIV/0!	0	1	0	0	1	0	0.577804	0.0259596
AT2G01970	protein_coding	endomembrane protein 70, putative		similar to endomembrane protein 70, putative [Arabidopsis thaliana] (TAIR:AT1G14670.1); similar to unknown protein [Arabidopsis thaliana] (TAIR:AT5G37310.1); similar to Putative endosomal protein [Oryza sativa (japonica cultivar-group)] (GB:AAK52585.1); s	0	1	0	0	0	#DIV/0!	0	1	0	1.0215	0.934604
AT2G02130	protein_coding	LCR68/PDF2.3 (Low-molecular-weight cysteine-rich 68); protease inhibitor		Identical to Probable low-molecular-weight cysteine-rich protein LCR68 precursor (LCR68) [Arabidopsis Thaliana] (GB:Q9ZUL7); similar to LCR69/PDF2.2 (Low-molecular-weight cysteine-rich 69), protease inhibitor [Arabidopsis thaliana] (TAIR:AT2G02100.1); sim	0	0	#DIV/0!	0	1	0	0	1	0	1.86119	0.0460456
AT2G02160	protein_coding	zinc finger (CCCH-type) family protein		similar to unnamed protein product [Vitis vinifera] (GB:CAO15426.1); contains InterPro domain Zinc finger, CCCH-type; (InterPro:IPR000571)	0	0	#DIV/0!	0	1	0	0	1	0	1.02374	0.935575
AT2G02540	protein_coding	ATHB21/ZFHD4 (ZINC FINGER HOMEODOMAIN 4); DNA binding / transcription factor	Zinc finger homeobox protein. Expressed in vascular tissue.	similar to ATHB31 (ARABIDOPSIS THALIANA HOMEOBOX PROTEIN 31), transcription factor [Arabidopsis thaliana] (TAIR:AT1G14440.1); similar to ATHB31 (ARABIDOPSIS THALIANA HOMEOBOX PROTEIN 31), transcription factor [Arabidopsis thaliana] (TAIR:AT1G14440.2); sim	0	0	#DIV/0!	0	1	0	0	1	0	0.825765	0.0343523
AT2G02570	protein_coding	nucleic acid binding		similar to unnamed protein product [Vitis vinifera] (GB:CAO46915.1); contains InterPro domain Tudor; (InterPro:IPR002999)	0	0	#DIV/0!	0	1	0	0	1	0	1.01416	0.970523
AT2G02720	protein_coding	pectate lyase family protein		Identical to Probable pectate lyase 6 precursor [Arabidopsis Thaliana] (GB:O64510); similar to AT59 (Arabidopsis homolog of tomato LAT59), lyase/ pectate lyase [Arabidopsis thaliana] (TAIR:AT1G14420.1); similar to hypothetical protein [Vitis vinifera] (G	0	0	#DIV/0!	0	1	0	0	1	0	0.955304	0.540842
AT2G02810	protein_coding	ATUTR1/UTR1 (UDP-GALACTOSE TRANSPORTER 1); UDP-galactose transmembrane transporter/ UDP-glucose transmembrane transporter/ pyrimidine nucleotide sugar transmembrane transporter	Encodes a multitransmembrane hydrophobic protein that functions as transporter of UDP-galactose and UDP-glucose into the Golgi. Localized in the ER. Involved in the unfolded protein response, a mechanism that controls proper protein folding in the ER.	similar to ATUTR3/UTR3 (UDP-GALACTOSE TRANSPORTER 3), pyrimidine nucleotide sugar transmembrane transporter [Arabidopsis thaliana] (TAIR:AT1G14360.1); similar to UDP-galactose transporter homolog 1, related [Medicago truncatula] (GB:ABD32994.1); contains	0	0	#DIV/0!	0	1	0	0	1	0	0.45797	0.0349133
AT2G03250	protein_coding	EXS family protein / ERD1/XPR1/SYG1 family protein		similar to EXS family protein / ERD1/XPR1/SYG1 family protein [Arabidopsis thaliana] (TAIR:AT2G03260.1); similar to ATP binding / ATPase, coupled to transmembrane movement of substances [Arabidopsis thaliana] (TAIR:AT1G14040.1); similar to EXS family prot	0	1	0	0	0	#DIV/0!	0	1	0
AT2G03690	protein_coding	coenzyme Q biosynthesis Coq4 family protein / ubiquinone biosynthesis Coq4 family protein	Ubiquinone biosynthesis protein COQ4 homolog.	Identical to Ubiquinone biosynthesis protein COQ4 homolog [Arabidopsis Thaliana] (GB:Q9ZPR0); similar to unnamed protein product [Vitis vinifera] (GB:CAO42506.1); contains InterPro domain Coenzyme Q biosynthesis Coq4 (InterPro:IPR007715)	0	1	0	0	0	#DIV/0!	0	1	0	1.02792	0.774761
AT2G04220	protein_coding			similar to unknown protein [Arabidopsis thaliana] (TAIR:AT4G12690.1); similar to unnamed protein product [Vitis vinifera] (GB:CAO41124.1); contains InterPro domain Protein of unknown function DUF868, plant (InterPro:IPR008586)	0	0	#DIV/0!	0	1	0	0	1	0	1.00467	0.942426
AT2G04270	protein_coding	glycoside hydrolase starch-binding domain-containing protein		similar to hypothetical protein OsJ_025791 [Oryza sativa (japonica cultivar-group)] (GB:EAZ42308.1); similar to unnamed protein product [Vitis vinifera] (GB:CAO41131.1); similar to hypothetical protein OsI_027764 [Oryza sativa (indica cultivar-group)] (GB	0	0	#DIV/0!	0	1	0	0	1	0	1.36863	0.0860159
AT2G04620	protein_coding	cation efflux family protein		similar to cation efflux family protein / metal tolerance protein, putative [Arabidopsis thaliana] (TAIR:AT3G12100.1); similar to cation efflux family protein / metal tolerance protein, putative [Arabidopsis thaliana] (TAIR:AT3G12100.2); similar to unname	0	1	0	0	0	#DIV/0!	0	1	0	0.946376	0.845773
AT2G04690	protein_coding	cellular repressor of E1A-stimulated genes (CREG) family		similar to unknown [Populus trichocarpa] (GB:ABK95925.1); contains InterPro domain FMN-binding split barrel, related (InterPro:IPR009002); contains InterPro domain Cellular repressor of E1A-stimulated genes (CREG) (InterPro:IPR014631); contains InterPro d	0	0	#DIV/0!	0	1	0	0	1	0	1.28195	0.248353
AT2G04880	protein_coding	ZAP1 (WRKY FAMILY TRANSCRIPTION FACTOR 1); transcription activator/ transcription factor	Encodes WRKY1, a member of the WRKY transcription factors in plants involved in disease resistance, abiotic stress, senescence as well as in some developmental processes. WRKY1 is involved in the salicylic acid signaling pathway. The crystal structure o	Identical to WRKY transcription factor 1 (WRKY1) [Arabidopsis Thaliana] (GB:Q9SI37;GB:Q058Q1;GB:Q43388); similar to WRKY20 (WRKY DNA-binding protein 20), transcription factor [Arabidopsis thaliana] (TAIR:AT4G26640.1); similar to WRKY20 (WRKY DNA-binding	0	0	#DIV/0!	0	1	0	0	1	0	0.843587	0.31425
AT2G05170	protein_coding	ATVPS11 (Arabidopsis thaliana vacuolar protein sorting 11); transporter	Homologous to yeast VPS11. Forms a complex with VCL1 and AtVPS33. Involved in vacuolar biogenesis.	similar to hypothetical protein OsJ_013975 [Oryza sativa (japonica cultivar-group)] (GB:EAZ30492.1); similar to hypothetical protein OsI_015087 [Oryza sativa (indica cultivar-group)] (GB:EAY93854.1); similar to unnamed protein product [Vitis vinifera] (GB	0	1	0	0	0	#DIV/0!	0	1	0	1.22205	0.374092
AT2G05210	protein_coding	ATPOT1A (PROTECTION OF TELOMERES 1A); telomeric DNA binding	Encodes AtPOT1a, an accessory factor for telomerase required for positive telomere length regulation. Note on nomenclature: different names have been given to Arabidopsis POT-like genes (Kuchar and Fajkus, 2004; Shakirov et al, 2005; Tani and Murata, 2005	similar to ATPOT1B (PROTECTION OF TELOMERES 1B), DNA binding [Arabidopsis thaliana] (TAIR:AT5G06310.1); similar to unnamed protein product [Vitis vinifera] (GB:CAO68206.1); contains InterPro domain Telomere end binding protein; (InterPro:IPR011564); conta	0	1	0	0	0	#DIV/0!	0	1	0	1.05586	0.74099
AT2G05710	protein_coding	aconitate hydratase, cytoplasmic, putative / citrate hydro-lyase/aconitase, putative		Identical to Aconitate hydratase 2, mitochondrial precursor (ACO2) [Arabidopsis Thaliana] (GB:Q9SIB9;GB:Q8L784); similar to aconitate hydratase, cytoplasmic / citrate hydro-lyase / aconitase (ACO) [Arabidopsis thaliana] (TAIR:AT4G35830.1); similar to aco	0	1	0	0	0	#DIV/0!	0	1	0	0.829461	0.39171
AT2G05830	protein_coding	eukaryotic translation initiation factor 2B family protein / eIF-2B family protein		similar to eukaryotic translation initiation factor 2B family protein / eIF-2B family protein [Arabidopsis thaliana] (TAIR:AT3G07300.2); similar to eukaryotic translation initiation factor 2B family protein / eIF-2B family protein [Arabidopsis thaliana] (	0	0	#DIV/0!	0	1	0	0	1	0	0.692157	0.19386
AT2G06005	protein_coding			similar to unknown protein [Arabidopsis thaliana] (TAIR:AT5G20580.1); similar to unknown protein [Arabidopsis thaliana] (TAIR:AT5G20580.2); similar to unknown [Populus trichocarpa] (GB:ABK93352.1)	0	0	#DIV/0!	0	1	0	0	1	0	0.989581	0.921201
AT2G06025	protein_coding	GCN5-related N-acetyltransferase (GNAT) family protein		similar to GCN5-related N-acetyltransferase (GNAT) family protein [Arabidopsis thaliana] (TAIR:AT4G28030.1); similar to unnamed protein product [Vitis vinifera] (GB:CAO65252.1); contains InterPro domain Acyl-CoA N-acyltransferase (InterPro:IPR016181); con	0	0	#DIV/0!	0	3	0	0	3	0
AT2G06210	protein_coding	ELF8 (EARLY FLOWERING 8); binding	Encodes a yeast CTR9 homolog that is involved in the control of flowering time by elevating FLC expression to a level that creates the vernalization-responsive, winter-annual habit. Yeast CTR9 is a component of a five-member PAF1 complex that associates	similar to SEC (SECRET AGENT), transferase, transferring glycosyl groups [Arabidopsis thaliana] (TAIR:AT3G04240.1); similar to putative TPR-containing nuclear phosphoprotein [Oryza sativa (japonica cultivar-group)] (GB:BAC16228.1); similar to unnamed prot	0	1	0	0	0	#DIV/0!	0	1	0	1.06772	0.461966
AT2G06530	protein_coding	VPS2.1		similar to VPS2.3 [Arabidopsis thaliana] (TAIR:AT1G03950.1); similar to hypothetical protein [Vitis vinifera] (GB:CAN80030.1); contains InterPro domain Snf7; (InterPro:IPR005024)	0	2	0	0	1	0	0	3	0	0.784339	0.366369
AT2G07760	protein_coding	zinc knuckle (CCHC-type) family protein		similar to unknown protein [Arabidopsis thaliana] (TAIR:AT5G28823.1); similar to putative DNA/RNA binding protein [Brassica napus] (GB:AAM82603.1); contains InterPro domain Zinc finger, CCHC-type; (InterPro:IPR001878)	0	0	#DIV/0!	0	2	0	0	2	0	0.873488	0.145698
AT2G12190	protein_coding	cytochrome P450, putative		similar to CYP89A6 (cytochrome P450, family 87, subfamily A, polypeptide 6), oxygen binding [Arabidopsis thaliana] (TAIR:AT1G64940.1); similar to CYP89A5 (cytochrome P450, family 87, subfamily A, polypeptide 5), oxygen binding [Arabidopsis thaliana] (TAIR	0	0	#DIV/0!	0	1	0	0	1	0	1.20458	0.371125
AT2G13290	protein_coding	glycosyl transferase family 17 protein		similar to glycosyl transferase family 17 protein [Arabidopsis thaliana] (TAIR:AT3G27540.1); similar to unnamed protein product [Vitis vinifera] (GB:CAO65704.1); contains InterPro domain Glycosyl transferase, family 17; (InterPro:IPR006813)	0	0	#DIV/0!	0	1	0	0	1	0	1.26491	0.24699
AT2G14247	protein_coding	Expressed protein			0	0	#DIV/0!	0	1	0	0	1	0
AT2G14890	protein_coding	AGP9 (ARABINOGALACTAN PROTEIN 9)	putative proline-rich protein (At2g14890) mRNA, complete	Identical to Classical arabinogalactan protein 9 precursor (AGP9) [Arabidopsis Thaliana] (GB:Q9C5S0;GB:O82327); contains InterPro domain Glutelin; (InterPro:IPR000480)	0	1	0	0	0	#DIV/0!	0	1	0	1.0941	0.70577
AT2G14900	protein_coding	gibberellin-regulated family protein		similar to gibberellin-regulated family protein [Arabidopsis thaliana] (TAIR:AT5G59845.1); similar to unknown [Populus trichocarpa] (GB:ABK94917.1); contains InterPro domain Gibberellin regulated protein (InterPro:IPR003854)	0	1	0	0	3	0	0	4	0	0.702173	0.336482
AT2G15530	protein_coding	zinc finger (C3HC4-type RING finger) family protein		similar to zinc finger (C3HC4-type RING finger) family protein [Arabidopsis thaliana] (TAIR:AT4G34040.1); similar to unnamed protein product [Vitis vinifera] (GB:CAO47833.1); contains InterPro domain Zinc finger, RING/FYVE/PHD-type (InterPro:IPR013083); c	0	0	#DIV/0!	0	2	0	0	2	0	0.867357	0.497184
AT2G15570	protein_coding	ATHM3 (ARABIDOPSIS THIOREDOXIN M-TYPE 3); thiol-disulfide exchange intermediate	chloroplast protein similar to prokaryotic thioredoxin.	Identical to Thioredoxin M-type 3, chloroplast precursor [Arabidopsis Thaliana] (GB:Q9SEU7;GB:Q42072;GB:Q9SKS6); similar to ATHM4 (Arabidopsis thioredoxin M-type 4), thiol-disulfide exchange intermediate [Arabidopsis thaliana] (TAIR:AT3G15360.1); similar	0	0	#DIV/0!	0	1	0	0	1	0	1.28236	0.0647092
AT2G15860	protein_coding			similar to unnamed protein product [Vitis vinifera] (GB:CAO47727.1)	0	0	#DIV/0!	0	1	0	0	1	0	0.928931	0.698247
AT2G15880	protein_coding	leucine-rich repeat family protein / extensin family protein		similar to leucine-rich repeat family protein / extensin family protein [Arabidopsis thaliana] (TAIR:AT4G33970.1); similar to unnamed protein product [Vitis vinifera] (GB:CAO47727.1); contains InterPro domain Pistil-specific extensin-like protein; (InterP	0	1	0	0	0	#DIV/0!	0	1	0	0.821026	0.425118
AT2G16005	protein_coding	MD-2-related lipid recognition domain-containing protein / ML domain-containing protein		similar to MD-2-related lipid recognition domain-containing protein / ML domain-containing protein [Arabidopsis thaliana] (TAIR:AT3G44100.1); similar to unknown [Populus trichocarpa] (GB:ABK93234.1); contains InterPro domain MD-2-related lipid-recognition	0	0	#DIV/0!	0	1	0	0	1	0	0.920559	0.724744
AT2G16405	protein_coding	transducin family protein / WD-40 repeat family protein		similar to transducin family protein / WD-40 repeat family protein [Arabidopsis thaliana] (TAIR:AT3G49660.1); similar to unnamed protein product [Vitis vinifera] (GB:CAO47215.1); contains InterPro domain WD40 repeat-like (InterPro:IPR011046); contains Int	0	0	#DIV/0!	0	1	0	0	1	0
AT2G16460	protein_coding			similar to unknown protein [Arabidopsis thaliana] (TAIR:AT3G51090.1); similar to Os06g0713100 [Oryza sativa (japonica cultivar-group)] (GB:NP_001058564.1); similar to unnamed protein product [Vitis vinifera] (GB:CAO48264.1); contains InterPro domain Prote	0	0	#DIV/0!	0	1	0	0	1	0	0.964786	0.755657
AT2G16500	protein_coding	ADC1 (ARGININE DECARBOXYLASE 1)	encodes a arginine decarboxylase (ADC), a rate-limiting enzyme that catalyzes the first step of polyamine (PA) biosynthesis via ADC pathway in Arabidopsis thaliana. Arabidopsis genome has two ADC paralogs, ADC1 and ADC2. Double mutant analysis showed that	Identical to Arginine decarboxylase 1 (SPE1) [Arabidopsis Thaliana] (GB:Q9SI64;GB:Q38938); similar to ADC2 (ARGININE DECARBOXYLASE 2) [Arabidopsis thaliana] (TAIR:AT4G34710.2); similar to ADC2 (ARGININE DECARBOXYLASE 2) [Arabidopsis thaliana] (TAIR:AT4G3	0	0	#DIV/0!	0	1	0	0	1	0	0.835433	0.284264
AT2G16600	protein_coding	ROC3 (rotamase CyP 3); peptidyl-prolyl cis-trans isomerase	Encodes cytosolic cyclophilin ROC3.	Identical to Peptidyl-prolyl cis-trans isomerase CYP19-1 (CYP19-1) [Arabidopsis Thaliana] (GB:Q38900); similar to peptidyl-prolyl cis-trans isomerase / cyclophilin (CYP2) / rotamase [Arabidopsis thaliana] (TAIR:AT2G21130.1); similar to cyclophilin [Thell	0	1	0	0	1	0	0	2	0	0.797852	0.642251
AT2G16770	protein_coding	DNA binding / transcription factor		similar to bZIP transcription factor family protein [Arabidopsis thaliana] (TAIR:AT4G35040.1); similar to hypothetical protein [Vitis vinifera] (GB:CAN73631.1); contains InterPro domain Basic-leucine zipper (bZIP) transcription factor; (InterPro:IPR004827	0	1	0	0	2	0	0	3	0
AT2G16780	protein_coding	MSI2 (NUCLEOSOME/CHROMATIN ASSEMBLY FACTOR GROUP C 2)	Encodes a WD-40 repeat protein similar to yeast MSI1.	Identical to WD-40 repeat-containing protein MSI2 (MSI2) [Arabidopsis Thaliana] (GB:O22468); similar to MSI3 (NUCLEOSOME/CHROMATIN ASSEMBLY FACTOR GROUP C 3), protein binding [Arabidopsis thaliana] (TAIR:AT4G35050.1); similar to putative retinoblastoma bi	0	0	#DIV/0!	0	3	0	0	3	0	1.08988	0.675717
AT2G16920	protein_coding	PFU2/UBC23 (UBIQUITIN-CONJUGATING ENZYME 23); ubiquitin-protein ligase		similar to ATUBC24/PHO2/UBC24 (PHOSPHATE 2), ubiquitin-protein ligase [Arabidopsis thaliana] (TAIR:AT2G33770.1); similar to P0044F08.17 [Oryza sativa (japonica cultivar-group)] (GB:BAB21187.1); similar to unnamed protein product [Vitis vinifera] (GB:CAO47	0	0	#DIV/0!	0	1	0	0	1	0	1.15796	0.3426
AT2G16950	protein_coding	protein transporter		similar to importin beta-2 subunit family protein [Arabidopsis thaliana] (TAIR:AT2G16960.1); similar to unnamed protein product [Vitis vinifera] (GB:CAO61967.1); similar to hypothetical protein OsI_017396 [Oryza sativa (indica cultivar-group)] (GB:EAY9616	0	0	#DIV/0!	0	1	0	0	1	0	1.36914	0.208736
AT2G17000	protein_coding	mechanosensitive ion channel domain-containing protein / MS ion channel domain-containing protein		similar to mechanosensitive ion channel domain-containing protein / MS ion channel domain-containing protein [Arabidopsis thaliana] (TAIR:AT1G53470.1); similar to unknown protein [Arabidopsis thaliana] (TAIR:AT3G14810.1); similar to mechanosensitive ion c	0	1	0	0	0	#DIV/0!	0	1	0	0.825443	0.478255
AT2G17190	protein_coding	ubiquitin family protein		similar to ubiquitin family protein [Arabidopsis thaliana] (TAIR:AT2G17200.1); similar to hypothetical protein [Vitis vinifera] (GB:CAN59899.1); contains InterPro domain Heat shock chaperonin-binding (InterPro:IPR006636); contains InterPro domain Ubiquiti	0	0	#DIV/0!	0	1	0	0	1	0
AT2G17380	protein_coding	AP19 (associated protein 19); ATP binding / protein binding / protein kinase	Encodes clathrin assembly protein AP19.	similar to clathrin adaptor complex small chain family protein [Arabidopsis thaliana] (TAIR:AT4G35410.2); similar to hypothetical protein [Vitis vinifera] (GB:CAN79566.1); contains InterPro domain Longin-like; (InterPro:IPR011012); contains InterPro domai	0	0	#DIV/0!	0	1	0	0	1	0	0.923528	0.662288
AT2G17390	protein_coding	AKR2B; protein binding / transcription regulator	Highly homologous to AKR2A. Involved in chloroplast biogenesis. Double mutants of AKR2A and AKR2B have yellow leaves, significantly reduced chloroplast proteins, and no thylakoid membranes.	similar to AKR2 (ANKYRIN REPEAT-CONTAINING PROTEIN 2), protein binding [Arabidopsis thaliana] (TAIR:AT4G35450.1); similar to AKR2 (ANKYRIN REPEAT-CONTAINING PROTEIN 2), protein binding [Arabidopsis thaliana] (TAIR:AT4G35450.3); similar to AKR2 (ANKYRIN RE	0	0	#DIV/0!	0	3	0	0	3	0	0.834615	0.32144
AT2G17420	protein_coding	NTRA (NADPH-dependent thioredoxin reductase 2)	NADPH-dependent thioredoxin reductase, major cytosolic isoform	Identical to Thioredoxin reductase 2 (NTR2) [Arabidopsis Thaliana] (GB:Q39242;GB:O22751); similar to NTR1 (NADPH-dependent thioredoxin reductase 1) [Arabidopsis thaliana] (TAIR:AT4G35460.1); similar to unnamed protein product [Vitis vinifera] (GB:CAO6851	0	0	#DIV/0!	0	1	0	0	1	0	0.841983	0.127375
AT2G17450	protein_coding	RHA3A (RING-H2 finger A3A); protein binding / zinc ion binding	Encodes a putative RING-H2 finger protein RHA3a.	Identical to RING-H2 finger protein ATL2A (ATL2A) [Arabidopsis Thaliana] (GB:O22755); similar to RHA3B (RING-H2 finger A3B), protein binding / zinc ion binding [Arabidopsis thaliana] (TAIR:AT4G35480.1); similar to unnamed protein product [Vitis vinifera]	0	0	#DIV/0!	0	2	0	0	2	0	0.439884	0.00113975
AT2G17640	protein_coding	AtSerat3;1 (SERINE ACETYLTRANSFERASE-106); acetyltransferase/ serine O-acetyltransferase	Encodes a cytosolic serine O-acetyltransferase involved in sulfur assimilation and cysteine biosynthesis. Expressed in the vascular system. Expression is induced after long-term sulfur starvation.	Identical to Serine acetyltransferase 2 (SAT2) [Arabidopsis Thaliana] (GB:Q8S895;GB:Q9STB0;GB:Q9ZPJ4); similar to ATSERAT3,2 (SERINE ACETYLTRANSFERASE 3,2), acetyltransferase/ serine O-acetyltransferase [Arabidopsis thaliana] (TAIR:AT4G35640.1); similar	0	0	#DIV/0!	0	1	0	0	1	0	0.811662	0.0319487
AT2G17695	protein_coding			similar to unnamed protein product [Vitis vinifera] (GB:CAO40657.1)	0	1	0	0	0	#DIV/0!	0	1	0
AT2G17730	protein_coding	zinc finger (C3HC4-type RING finger) family protein		Identical to RING-H2 finger protein ATL2B (ATL2B) [Arabidopsis Thaliana] (GB:Q8GT74;GB:Q8GWW3); similar to zinc finger (C3HC4-type RING finger) family protein [Arabidopsis thaliana] (TAIR:AT4G35840.1); similar to unnamed protein product [Vitis vinifera]	0	0	#DIV/0!	0	1	0	0	1	0	1.00128	0.992331
AT2G17787	protein_coding			similar to unknown protein [Arabidopsis thaliana] (TAIR:AT4G35940.1); similar to hypothetical protein [Vitis vinifera] (GB:CAN63050.1)	0	0	#DIV/0!	0	1	0	0	1	0
AT2G17870	protein_coding	cold-shock DNA-binding family protein		similar to CSDP1 (COLD SHOCK DOMAIN PROTEIN 1), RNA binding / double-stranded DNA binding / nucleic acid binding / single-stranded DNA binding [Arabidopsis thaliana] (TAIR:AT4G36020.1); similar to hypothetical protein [Vitis vinifera] (GB:CAN59784.1); con	0	1	0	0	0	#DIV/0!	0	1	0	0.9777	0.914899
AT2G18020	protein_coding	EMB2296 (EMBRYO DEFECTIVE 2296); structural constituent of ribosome		Identical to 60S ribosomal protein L8-1 (RPL8A) [Arabidopsis Thaliana] (GB:P46286;GB:Q9SL44); similar to 60S ribosomal protein L8 (RPL8C) [Arabidopsis thaliana] (TAIR:AT4G36130.1); similar to unknown [Populus trichocarpa] (GB:ABK93898.1); contains InterP	0	1	0	0	0	#DIV/0!	0	1	0	0.936273	0.629416
AT2G18030	protein_coding	peptide methionine sulfoxide reductase family protein		similar to PMSR1 (PEPTIDEMETHIONINE SULFOXIDE REDUCTASE 1), peptide-methionine-(S)-S-oxide reductase [Arabidopsis thaliana] (TAIR:AT5G61640.1); similar to unnamed protein product [Vitis vinifera] (GB:CAO48234.1); contains InterPro domain Methionine sulpho	0	0	#DIV/0!	0	1	0	0	1	0	1.10312	0.595116
AT2G18050	protein_coding	HIS1-3 (HISTONE H1-3); DNA binding	encodes a structurally divergent linker histone whose gene expression is induced by dehydration and ABA.	similar to histone H1, putative [Arabidopsis thaliana] (TAIR:AT1G06760.1); similar to histone H1.2 [Arabidopsis thaliana] (TAIR:AT2G30620.1); similar to unnamed protein product [Vitis vinifera] (GB:CAO48240.1); contains InterPro domain Winged helix repres	0	1	0	0	0	#DIV/0!	0	1	0	1.0641	0.838142
AT2G18328	protein_coding	DNA binding		similar to DNA binding / transcription factor [Arabidopsis thaliana] (TAIR:AT4G39250.1); similar to unnamed protein product [Vitis vinifera] (GB:CAO47617.1); contains InterPro domain Molecular chaperone, heat shock protein, Hsp40, DnaJ (InterPro:IPR015609	0	1	0	0	0	#DIV/0!	0	1	0
AT2G18700	protein_coding	ATTPS11 (Arabidopsis thaliana trehalose phosphatase/synthase 11); transferase, transferring glycosyl groups	Encodes an enzyme putatively involved in trehalose biosynthesis. The protein has a trehalose synthase (TPS)-like domain that may or may not be active as well as a trehalose phosphatase (TPP)-like domain.	similar to ATTPS9 (Arabidopsis thaliana trehalose-phosphatase/synthase 9), transferase, transferring glycosyl groups / trehalose-phosphatase [Arabidopsis thaliana] (TAIR:AT1G23870.1); similar to ATTPS5 (Arabidopsis thaliana trehalose phosphatase/synthase	0	0	#DIV/0!	0	1	0	0	1	0	0.783282	0.113725
AT2G18750	protein_coding	calmodulin-binding protein		similar to calmodulin-binding protein [Arabidopsis thaliana] (TAIR:AT5G57580.1); similar to calmodulin-binding protein [Arabidopsis thaliana] (TAIR:AT4G25800.2); similar to calmodulin-binding protein [Arabidopsis thaliana] (TAIR:AT4G25800.1); similar to u	0	0	#DIV/0!	0	1	0	0	1	0	0.856863	0.704428
AT2G18890	protein_coding	protein kinase family protein		similar to protein kinase family protein [Arabidopsis thaliana] (TAIR:AT5G18910.1); similar to unnamed protein product [Vitis vinifera] (GB:CAO43224.1); contains InterPro domain Protein kinase, core; (InterPro:IPR000719); contains InterPro domain Protein	0	0	#DIV/0!	0	1	0	0	1	0	1.32239	0.360951
AT2G19160	protein_coding			similar to unknown protein [Arabidopsis thaliana] (TAIR:AT4G30060.1); similar to unnamed protein product [Vitis vinifera] (GB:CAO64039.1); contains InterPro domain Protein of unknown function DUF266, plant (InterPro:IPR004949)	0	0	#DIV/0!	0	1	0	0	1	0
AT2G19270	protein_coding			similar to unnamed protein product [Vitis vinifera] (GB:CAO69581.1)	0	1	0	0	0	#DIV/0!	0	1	0	0.949996	0.677561
AT2G19350	protein_coding			similar to unknown protein [Arabidopsis thaliana] (TAIR:AT4G29850.1); similar to hypothetical protein [Vitis vinifera] (GB:CAN75495.1); contains InterPro domain Protein of unknown function DUF872, eukaryotic (InterPro:IPR008590)	0	1	0	0	1	0	0	2	0	1.03375	0.902429
AT2G19640	protein_coding	ASHR2 (ASH1-RELATED PROTEIN 2)		Identical to Histone-lysine N-methyltransferase ASHR2 (ASHR2) [Arabidopsis Thaliana] (GB:Q9ZUM9;GB:Q84WB9;GB:Q94CD2); similar to unknown protein [Arabidopsis thaliana] (TAIR:AT5G06620.1); similar to hypothetical protein [Vitis vinifera] (GB:CAN82112.1);	0	0	#DIV/0!	0	1	0	0	1	0	1.34098	0.0430967
AT2G19740	protein_coding	60S ribosomal protein L31 (RPL31A)		Identical to 60S ribosomal protein L31-1 (RPL31A) [Arabidopsis Thaliana] (GB:Q9SLL7); similar to 60S ribosomal protein L31 (RPL31C) [Arabidopsis thaliana] (TAIR:AT5G56710.1); similar to 60S ribosomal protein L31 (RPL31B) [Arabidopsis thaliana] (TAIR:AT4G2	0	1	0	0	0	#DIV/0!	0	1	0	1.15869	0.405454
AT2G19790	protein_coding	clathrin adaptor complex small chain family protein		similar to clathrin coat assembly protein, putative [Arabidopsis thaliana] (TAIR:AT1G47830.1); similar to unnamed protein product [Vitis vinifera] (GB:CAO65419.1); contains InterPro domain Longin-like; (InterPro:IPR011012); contains InterPro domain Clathr	0	1	0	0	0	#DIV/0!	0	1	0	0.846081	0.536252
AT2G19800	protein_coding	MIOX2 (MYO-INOSITOL OXYGENASE 2)	Encodes a myo-inositol oxygenase family gene.	Identical to Inositol oxygenase 2 (MIOX2) [Arabidopsis Thaliana] (GB:O82200;GB:Q8LCN3;GB:Q94JX0); similar to MIOX4 (MYO-INOSITOL OXYGENASE 4) [Arabidopsis thaliana] (TAIR:AT4G26260.1); similar to unnamed protein product [Vitis vinifera] (GB:CAO45773.1);	0	2	0	0	1	0	0	2	0	0.472976	0.0498731
AT2G19900	protein_coding	ATNADP-ME1 (NADP-MALIC ENZYME 1); malate dehydrogenase (oxaloacetate-decarboxylating) (NADP+)/ malic enzyme/ oxidoreductase, acting on NADH or NADPH, NAD or NADP as acceptor	The malic enzyme (EC 1.1.1.40) encoded by AtNADP-ME1 is expressed in response to developmental and cell-specific signals.	similar to ATNADP-ME4 (NADP-MALIC ENZYME 4), malate dehydrogenase (oxaloacetate-decarboxylating) (NADP+)/ malic enzyme/ oxidoreductase, acting on NADH or NADPH, NAD or NADP as acceptor [Arabidopsis thaliana] (TAIR:AT1G79750.1); similar to ATNADP-ME3 (NADP	0	0	#DIV/0!	0	2	0	0	2	0	0.183391	0.00107245
AT2G19940	protein_coding	semialdehyde dehydrogenase family protein		Identical to Probable N-acetyl-gamma-glutamyl-phosphate reductase, chloroplast precursor [Arabidopsis Thaliana] (GB:Q93Z70;GB:O82187); similar to unnamed protein product [Vitis vinifera] (GB:CAO47751.1); contains InterPro domain NAD(P)-binding; (InterPro	0	1	0	0	0	#DIV/0!	0	1	0	0.819459	0.235963
AT2G20060	protein_coding	ribosomal protein L4 family protein		similar to RPL4 (ribosomal protein L4), poly(U) binding / structural constituent of ribosome [Arabidopsis thaliana] (TAIR:AT1G07320.2); similar to RPL4 (ribosomal protein L4), poly(U) binding / structural constituent of ribosome [Arabidopsis thaliana] (TA	0	1	0	0	0	#DIV/0!	0	1	0	0.899401	0.226067
AT2G20120	protein_coding	COV1 (CONTINUOUS VASCULAR RING)	Encodes an integral membrane protein of unknown function, highly conserved between plants and bacteria; is likely to be involved in a mechanism that negatively regulates the differentiation of vascular tissue in the stem. Mutants display a dramatic incre	similar to LCV1 (LIKE COV 1) [Arabidopsis thaliana] (TAIR:AT2G20130.1); similar to unnamed protein product [Vitis vinifera] (GB:CAO65512.1); contains InterPro domain Protein of unknown function DUF502 (InterPro:IPR007462)	0	1	0	0	0	#DIV/0!	0	1	0
AT2G20250	protein_coding	unknown protein			0	1	0	0	0	#DIV/0!	0	1	0	1.33649	0.299607
AT2G20320	protein_coding	DENN (AEX-3) domain-containing protein		similar to DENN (AEX-3) domain-containing protein [Arabidopsis thaliana] (TAIR:AT5G35560.1); similar to hypothetical protein OsJ_009048 [Oryza sativa (japonica cultivar-group)] (GB:EAZ25565.1); similar to Os03g0145500 [Oryza sativa (japonica cultivar-grou	0	1	0	0	0	#DIV/0!	0	1	0	1.37635	0.263984
AT2G20820	protein_coding			similar to hypothetical protein [Capsicum chinense] (GB:CAJ13713.1)	0	2	0	0	0	#DIV/0!	0	2	0	0.731683	0.0431406
AT2G20890	protein_coding	PSB29 (THYLAKOID FORMATION1)	Chloroplast-localized Thylakoid formation1 gene product involved in vesicle-mediated formation of thylakoid membranes. Thf1 antisense lines contain abnormal chloroplasts early in leaf development (chloroplasts have loosely stacked thylakoid membranes). E	Identical to Protein THYLAKOID FORMATION 1, chloroplast precursor (THF1) [Arabidopsis Thaliana] (GB:Q9SKT0;GB:Q8LB69); similar to chloroplast light-regulated protein [Brassica rapa] (GB:ABV89647.1)	0	0	#DIV/0!	0	1	0	0	1	0	1.05571	0.680879
AT2G20920	protein_coding			similar to unnamed protein product [Vitis vinifera] (GB:CAO47410.1)	0	0	#DIV/0!	0	1	0	0	1	0	1.56047	0.0424323
AT2G21160	protein_coding	translocon-associated protein alpha (TRAP alpha) family protein		Identical to Translocon-associated protein subunit alpha precursor [Arabidopsis Thaliana] (GB:P45434;GB:Q94A59;GB:Q9SKP7); similar to unknown protein [Arabidopsis thaliana] (TAIR:AT2G16595.1); similar to hypothetical protein OsI_023592 [Oryza sativa (ind	0	0	#DIV/0!	0	1	0	0	1	0	1.05575	0.837401
AT2G21250	protein_coding	mannose 6-phosphate reductase (NADPH-dependent), putative		similar to mannose 6-phosphate reductase (NADPH-dependent), putative [Arabidopsis thaliana] (TAIR:AT2G21260.1); similar to NADPH-dependent mannose 6-phosphate reductase [Orobanche ramosa] (GB:AAG15839.2); contains InterPro domain Aldo/keto reductase; (Int	0	0	#DIV/0!	0	2	0	0	2	0
AT2G21380	protein_coding	kinesin motor protein-related		similar to kinesin-related protein (MKRP2) [Arabidopsis thaliana] (TAIR:AT4G39050.1); similar to hypothetical protein [Vitis vinifera] (GB:CAN80502.1); similar to Kinesin heavy chain, putative, expressed [Oryza sativa (japonica cultivar-group)] (GB:AAP545	0	0	#DIV/0!	0	1	0	0	1	0	0.775125	0.141299
AT2G21390	protein_coding	coatomer protein complex, subunit alpha, putative		Identical to Coatomer subunit alpha-2 [Arabidopsis Thaliana] (GB:Q9SJT9); similar to coatomer protein complex, subunit alpha, putative [Arabidopsis thaliana] (TAIR:AT1G62020.1); similar to unnamed protein product [Vitis vinifera] (GB:CAO61059.1); similar	0	1	0	0	1	0	0	2	0	1.07256	0.67057
AT2G21520	protein_coding	transporter		similar to SEC14 cytosolic factor, putative / phosphoglyceride transfer protein, putative [Arabidopsis thaliana] (TAIR:AT4G39170.1); similar to SEC14 cytosolic factor, putative / phosphoglyceride transfer protein, putative [Arabidopsis thaliana] (TAIR:AT1	0	0	#DIV/0!	0	1	0	0	1	0	0.860482	0.47855
AT2G21800	protein_coding			similar to unknown protein [Arabidopsis thaliana] (TAIR:AT2G22140.1); similar to unnamed protein product [Vitis vinifera] (GB:CAO71735.1)	0	2	0	0	0	#DIV/0!	0	2	0	0.929581	0.698668
AT2G21840	protein_coding	protein binding / zinc ion binding		similar to protein binding / zinc ion binding [Arabidopsis thaliana] (TAIR:AT2G21850.1); similar to DC1 domain-containing protein [Arabidopsis thaliana] (TAIR:AT2G21830.1); similar to DC1 domain-containing protein [Brassica oleracea] (GB:ABD65623.1); cont	0	1	0	0	0	#DIV/0!	0	1	0
AT2G22270	protein_coding			similar to unknown protein [Arabidopsis thaliana] (TAIR:AT4G39860.2); similar to unnamed protein product [Vitis vinifera] (GB:CAO39818.1)	0	0	#DIV/0!	0	1	0	0	1	0	1.02456	0.835775
AT2G22430	protein_coding	ATHB6 (ARABIDOPSIS THALIANA HOMEOBOX PROTEIN 6); transcription factor	Encodes a homeodomain leucine zipper class I (HD-Zip I) protein.	Identical to Homeobox-leucine zipper protein ATHB-6 (ATHB-6) [Arabidopsis Thaliana] (GB:P46668;GB:Q9SJZ1;GB:Q9SQ78); similar to ATHB-16/ATHB16 (ARABIDOPSIS THALIANA HOMEOBOX PROTEIN 16), transcription activator/ transcription factor [Arabidopsis thaliana	0	0	#DIV/0!	0	2	0	0	2	0	1.01751	0.960865
AT2G22530	protein_coding	transferase		similar to phosphatidylinositolglycan class O (PIG-O) family protein [Arabidopsis thaliana] (TAIR:AT5G17250.1); similar to unnamed protein product [Vitis vinifera] (GB:CAO66500.1); contains InterPro domain Alkaline phosphatase; (InterPro:IPR001952)	0	1	0	0	0	#DIV/0!	0	1	0	1.10063	0.661224
AT2G22670	protein_coding	IAA8 (indoleacetic acid-induced protein 8); transcription factor	IAA8 (IAA8) gene is auxin inducible.	Identical to Auxin-responsive protein IAA8 (IAA8) [Arabidopsis Thaliana] (GB:Q38826); similar to IAA9 (indoleacetic acid-induced protein 9), transcription factor [Arabidopsis thaliana] (TAIR:AT5G65670.2); similar to GH1 protein [Glycine max] (GB:AAB70005	0	1	0	0	0	#DIV/0!	0	1	0	1.06308	0.571578
AT2G22680	protein_coding	zinc finger (C3HC4-type RING finger) family protein		similar to EDA40 (embryo sac development arrest 40), protein binding / ubiquitin-protein ligase/ zinc ion binding [Arabidopsis thaliana] (TAIR:AT4G37890.1); similar to EDA40 (embryo sac development arrest 40), protein binding / ubiquitin-protein ligase/ z	0	0	#DIV/0!	0	2	0	0	2	0	1.07177	0.632399
AT2G22800	protein_coding	HAT9 (homeobox-leucine zipper protein 9); DNA binding / transcription factor	Encodes homeobox protein HAT9.	Identical to Homeobox-leucine zipper protein HAT9 (HAT9) [Arabidopsis Thaliana] (GB:P46603;GB:O82763;GB:Q0WP63); similar to HAT22 (homeobox-leucine zipper protein 22), transcription factor [Arabidopsis thaliana] (TAIR:AT4G37790.1); similar to hypothetica	0	2	0	0	0	#DIV/0!	0	2	0	1.21206	0.338261
AT2G23070	protein_coding	casein kinase II alpha chain, putative		similar to CKA2 (casein kinase II alpha chain 2), kinase [Arabidopsis thaliana] (TAIR:AT3G50000.1); similar to casein kinase II alpha subunit [Sinapis alba] (GB:CAD12663.1); contains InterPro domain Serine/threonine protein kinase; (InterPro:IPR002290); c	0	0	#DIV/0!	0	1	0	0	1	0	0.884289	0.454085
AT2G23150	protein_coding	NRAMP3 (NRAMP metal ion transporter 3); manganese ion transmembrane transporter/ metal ion transmembrane transporter	Encodes a member of the Nramp2 metal transporter family; like its homolog Atnramp4, localized in vacuolar membrane. Seedlings of double mutant, atnramp3-1 atnramp4-1, were arrested at early germination.	Identical to Metal transporter Nramp3 (NRAMP3) [Arabidopsis Thaliana] (GB:Q9SNV9;GB:O22192); similar to NRAMP5 (NRAMP metal ion transporter 5), metal ion transmembrane transporter [Arabidopsis thaliana] (TAIR:AT4G18790.1); similar to ATNRAMP4 (Arabidopsi	0	0	#DIV/0!	0	1	0	0	1	0	0.956452	0.690225
AT2G23170	protein_coding	GH3.3; indole-3-acetic acid amido synthetase	encodes an IAA-amido synthase that conjugates Asp and other amino acids to auxin in vitro.	Identical to Indole-3-acetic acid-amido synthetase GH3.3 (GH3.3) [Arabidopsis Thaliana] (GB:O22190); similar to GH3.1 [Arabidopsis thaliana] (TAIR:AT2G14960.1); similar to GH3.4, indole-3-acetic acid amido synthetase [Arabidopsis thaliana] (TAIR:AT1G5950	0	0	#DIV/0!	0	1	0	0	1	0	0.484009	0.00594508
AT2G23580	protein_coding	hydrolase, alpha/beta fold family protein		similar to hydrolase [Arabidopsis thaliana] (TAIR:AT2G23550.1); similar to unnamed protein product [Vitis vinifera] (GB:CAO42790.1); contains InterPro domain Alpha/beta hydrolase fold-1 (InterPro:IPR000073)	0	0	#DIV/0!	0	1	0	0	1	0	1.08586	0.442201
AT2G23820	protein_coding	metal-dependent phosphohydrolase HD domain-containing protein		similar to metal-dependent phosphohydrolase HD domain-containing protein [Arabidopsis thaliana] (TAIR:AT1G26160.1); similar to unnamed protein product [Vitis vinifera] (GB:CAO66590.1); contains InterPro domain Metal-dependent phosphohydrolase, HD region;	0	1	0	0	0	#DIV/0!	0	1	0
AT2G23840	protein_coding	HNH endonuclease domain-containing protein		similar to unnamed protein product [Vitis vinifera] (GB:CAO23496.1); contains InterPro domain HNH nuclease (InterPro:IPR003615); contains InterPro domain HNH endonuclease; (InterPro:IPR002711)	0	0	#DIV/0!	0	1	0	0	1	0	0.953589	0.804833
AT2G24060	protein_coding	translation initiation factor 3 (IF-3) family protein		similar to translation initiation factor 3 (IF-3) family protein [Arabidopsis thaliana] (TAIR:AT4G30690.1); similar to unnamed protein product [Vitis vinifera] (GB:CAO66646.1); contains InterPro domain Initiation factor 3; (InterPro:IPR001288)	0	1	0	0	0	#DIV/0!	0	1	0	1.16601	0.310901
AT2G25050	protein_coding	formin homology 2 domain-containing protein / FH2 domain-containing protein		Identical to Formin-like protein 18 (FH18) [Arabidopsis Thaliana] (GB:Q9SK28); similar to formin homology 2 domain-containing protein / FH2 domain-containing protein [Arabidopsis thaliana] (TAIR:AT3G32400.1); similar to unnamed protein product [Vitis vin	0	0	#DIV/0!	0	1	0	0	1	0
AT2G25120	protein_coding	bromo-adjacent homology (BAH) domain-containing protein		similar to bromo-adjacent homology (BAH) domain-containing protein [Arabidopsis thaliana] (TAIR:AT4G23120.1); similar to unnamed protein product [Vitis vinifera] (GB:CAO62823.1); contains InterPro domain Bromo adjacent region; (InterPro:IPR001025)	0	1	0	0	0	#DIV/0!	0	1	0
AT2G25190	protein_coding			similar to unknown protein [Arabidopsis thaliana] (TAIR:AT4G31980.1); similar to unnamed protein product [Vitis vinifera] (GB:CAO44286.1); contains InterPro domain Protein of unknown function DUF862, eukaryotic (InterPro:IPR008580)	0	0	#DIV/0!	0	1	0	0	1	0	1.02444	0.864359
AT2G25240	protein_coding	serine-type endopeptidase inhibitor		similar to serpin, putative / serine protease inhibitor, putative [Arabidopsis thaliana] (TAIR:AT2G26390.1); similar to hypothetical protein [Vitis vinifera] (GB:CAN78278.1); contains InterPro domain Protease inhibitor I4, serpin; (InterPro:IPR000215); co	0	0	#DIV/0!	0	1	0	0	1	0	1.24286	0.338951
AT2G25320	protein_coding			similar to meprin and TRAF homology domain-containing protein / MATH domain-containing protein [Arabidopsis thaliana] (TAIR:AT2G25330.1); similar to unnamed protein product [Vitis vinifera] (GB:CAO44257.1); similar to unknown [Populus trichocarpa] (GB:ABG	0	1	0	0	0	#DIV/0!	0	1	0
AT2G25605	protein_coding			similar to unnamed protein product [Vitis vinifera] (GB:CAO44153.1)	0	1	0	0	0	#DIV/0!	0	1	0
AT2G25740	protein_coding	ATP-dependent protease La (LON) domain-containing protein		similar to unnamed protein product [Vitis vinifera] (GB:CAO43717.1); contains InterPro domain Peptidase S16, lon N-terminal; (InterPro:IPR003111)	0	0	#DIV/0!	0	1	0	0	1	0	1.02781	0.859685
AT2G25760	protein_coding	protein kinase family protein		similar to protein kinase family protein [Arabidopsis thaliana] (TAIR:AT3G13670.1); similar to protein kinase family protein [Arabidopsis thaliana] (TAIR:AT5G18190.2); similar to protein kinase family protein [Arabidopsis thaliana] (TAIR:AT3G03940.1); sim	0	0	#DIV/0!	0	1	0	0	1	0	0.845144	0.701573
AT2G25800	protein_coding			similar to unknown protein [Arabidopsis thaliana] (TAIR:AT2G20010.2); similar to unknown protein [Arabidopsis thaliana] (TAIR:AT2G20010.1); similar to unknown protein [Arabidopsis thaliana] (TAIR:AT2G33420.1); similar to unnamed protein product [Vitis vin	0	1	0	0	0	#DIV/0!	0	1	0	0.998607	0.991957
AT2G25870	protein_coding	haloacid dehalogenase-like hydrolase family protein		similar to unnamed protein product [Vitis vinifera] (GB:CAO43749.1); contains InterPro domain HAD-superfamily hydrolase, subfamily IIB; (InterPro:IPR006379); contains InterPro domain Cof protein; (InterPro:IPR000150); contains InterPro domain Protein of u	0	0	#DIV/0!	0	1	0	0	1	0	0.957837	0.504675
AT2G25920	protein_coding			similar to 3'-5' exonuclease domain-containing protein / K homology domain-containing protein / KH domain-containing protein [Arabidopsis thaliana] (TAIR:AT2G25910.1); similar to 3'-5' exonuclease domain-containing protein / K homology domain-containing p	0	0	#DIV/0!	0	1	0	0	1	0	0.784851	0.273252
AT2G26230	protein_coding	uricase / urate oxidase / nodulin 35, putative		Identical to Uricase [Arabidopsis Thaliana] (GB:O04420;GB:O64848;GB:Q94A71); similar to uricase [Lotus japonicus] (GB:BAB18538.1); contains InterPro domain Uricase; (InterPro:IPR002042)	0	1	0	0	1	0	0	1	0	0.878015	0.673424
AT2G26550	protein_coding	HO2 (HEME OXYGENASE 2); heme oxygenase (decyclizing)	encodes a heme oxygenase that catalyzes the oxidation of heme to biliverdin IXalpha, CO and Fe(2+), a committed step in the biosynthesis of the phytochrome chromophore phytochromobilin.	similar to HY1 (HEME OXYGENASE 1) [Arabidopsis thaliana] (TAIR:AT2G26670.1); similar to unnamed protein product [Vitis vinifera] (GB:CAO61297.1); contains InterPro domain Haem oxygenase-like, multi-helical (InterPro:IPR016084); contains InterPro domain He	0	0	#DIV/0!	0	1	0	0	1	0	0.935777	0.833797
AT2G26660	protein_coding	SPX (SYG1/Pho81/XPR1) domain-containing protein		similar to SPX (SYG1/Pho81/XPR1) domain-containing protein [Arabidopsis thaliana] (TAIR:AT5G20150.1); similar to hypothetical protein [Vitis vinifera] (GB:CAN70098.1); contains InterPro domain SPX, N-terminal (InterPro:IPR004331)	0	0	#DIV/0!	0	2	0	0	1	0	1.20624	0.0966243
AT2G26830	protein_coding	EMB1187 (EMBRYO DEFECTIVE 1187); kinase/ phosphotransferase, alcohol group as acceptor		similar to choline kinase, putative [Arabidopsis thaliana] (TAIR:AT4G09760.2); similar to choline kinase, putative [Arabidopsis thaliana] (TAIR:AT4G09760.1); similar to hypothetical protein [Vitis vinifera] (GB:CAN63497.1); similar to unnamed protein prod	0	0	#DIV/0!	0	1	0	0	1	0	0.699445	0.0246254
AT2G26900	protein_coding	bile acid:sodium symporter family protein		similar to bile acid:sodium symporter family protein [Arabidopsis thaliana] (TAIR:AT1G78560.1); similar to unnamed protein product [Vitis vinifera] (GB:CAO65594.1); contains InterPro domain Bile acid:sodium symporter; (InterPro:IPR002657); contains InterP	0	1	0	0	1	0	0	2	0	0.885202	0.247127
AT2G26930	protein_coding	ATCDPMEK (PIGMENT DEFECTIVE 277); 4-(cytidine 5'-diphospho)-2-C-methyl-D-erythritol kinase	Encodes a 4-(cytidine 5'-phospho)-2-C-methyl-D-erithritol kinase.	Identical to 4-diphosphocytidyl-2-C-methyl-D-erythritol kinase, chloroplast precursor (ISPE) [Arabidopsis Thaliana] (GB:O81014;GB:Q9GI18); similar to 4-(cytidine 5'-diphospho)-2-C-methyl-D-erythritol kinase [Hevea brasiliensis] (GB:BAF98293.1); contains	0	0	#DIV/0!	0	1	0	0	1	0	0.949507	0.596013
AT2G26990	protein_coding	FUS12 (FUSCA 12)	Represses photomorphogenesis and induces skotomorphogenesis in the dark.	Identical to COP9 signalosome complex subunit 2 (CSN2) [Arabidopsis Thaliana] (GB:Q8W207;GB:Q94A24;GB:Q9ZVD8); similar to ATS9 (19S PROTEOSOME SUBUNIT 9) [Arabidopsis thaliana] (TAIR:AT1G29150.1); similar to putative COP9 signalosome complex subunit 2 [O	0	0	#DIV/0!	0	2	0	0	2	0	0.97865	0.945465
AT2G27020	protein_coding	PAG1 (20S proteasome alpha subunit G1); peptidase	Encodes 20S proteasome subunit PAG1 (PAG1).	Identical to Proteasome subunit alpha type-3 (PAG1) [Arabidopsis Thaliana] (GB:O23715;GB:O81151;GB:Q9M3S3); similar to PAE2 (20S proteasome alpha subunit E2), peptidase [Arabidopsis thaliana] (TAIR:AT3G14290.1); similar to PAE1 (20S proteasome alpha subu	0	0	#DIV/0!	0	1	0	0	1	0	0.883983	0.745295
AT2G27070	protein_coding	ARR13 (ARABIDOPSIS RESPONSE REGULATOR 13); transcription factor/ two-component response regulator	member of Response Regulator: B- Type	Identical to Putative two-component response regulator ARR13 (ARR13) [Arabidopsis Thaliana] (GB:Q9ZVD3); similar to ARR21 (ARABIDOPSIS RESPONSE REGULATOR 21), transcription factor/ two-component response regulator [Arabidopsis thaliana] (TAIR:AT5G07210.1)	0	1	0	0	0	#DIV/0!	0	1	0
AT2G27170	protein_coding	TTN7 (TITAN7); ATP binding	cohesin	similar to SMC2 (STRUCTURAL MAINTENANCE OF CHROMOSOMES 2) [Arabidopsis thaliana] (TAIR:AT5G62410.1); similar to condensin complex component SMC3 [Physcomitrella patens subsp. patens] (GB:EDQ50619.1); similar to putative SMC3 protein [Oryza sativa (japonic	0	0	#DIV/0!	0	1	0	0	1	0	1.20264	0.776666
AT2G27180	protein_coding	unknown protein			0	1	0	0	0	#DIV/0!	0	1	0	0.732837	0.269027
AT2G27260	protein_coding			similar to hypothetical protein [Vitis vinifera] (GB:CAN79941.1); contains InterPro domain Harpin-induced 1 (InterPro:IPR010847)	0	1	0	0	0	#DIV/0!	0	1	0	0.981452	0.837417
AT2G27490	protein_coding	ATCOAE; ATP binding / dephospho-CoA kinase	AT2G27490 encodes dephospho-CoA kinase. The molecular function was shown to phosphorylate the ribosyl moiety forming CoA.	similar to unnamed protein product [Vitis vinifera] (GB:CAO39975.1); contains InterPro domain Dephospho-CoA kinase; (InterPro:IPR001977)	0	0	#DIV/0!	0	1	0	0	1	0	0.906315	0.660038
AT2G27600	protein_coding	SKD1/VPS4; ATP binding	Encodes a SKD1 (Suppressor of K+ Transport Growth Defect1) homolog. Localized to the cytoplasm and to multivesicular endosomes. Involved in multivesicular endosome function.	similar to ERH3 (ECTOPIC ROOT HAIR 3), ATP binding / nucleoside-triphosphatase/ nucleotide binding [Arabidopsis thaliana] (TAIR:AT1G80350.1); similar to unnamed protein product [Vitis vinifera] (GB:CAO22301.1); similar to salt-induced AAA-Type ATPase [Mes	0	0	#DIV/0!	0	1	0	0	1	0	0.905315	0.301582
AT2G27680	protein_coding	aldo/keto reductase family protein		similar to aldo/keto reductase family protein [Arabidopsis thaliana] (TAIR:AT1G06690.1); similar to hypothetical protein [Vitis vinifera] (GB:CAN82646.1); contains InterPro domain Aldo/keto reductase; (InterPro:IPR001395)	0	0	#DIV/0!	0	1	0	0	1	0	0.903694	0.523216
AT2G27830	protein_coding			similar to pentatricopeptide (PPR) repeat-containing protein [Arabidopsis thaliana] (TAIR:AT4G22760.1); similar to hypothetical protein [Catharanthus roseus] (GB:CAC09928.1)	0	0	#DIV/0!	0	1	0	0	1	0	1.39175	0.168773
AT2G27960	protein_coding	CKS1/CKS1AT (CDK-SUBUNIT 1); cyclin-dependent protein kinase/ protein binding	catalytic subunit of cyclin dependent kinase 1. physically interact with cyclin-dependent kinases (CDKs) and play an essential, but yet not entirely resolved, role in the regulation of the cell cycle	Identical to Cyclin-dependent kinases regulatory subunit 1 (CKS1) [Arabidopsis Thaliana] (GB:O23249); similar to CKS2 (CDK-SUBUNIT 2), cyclin-dependent protein kinase [Arabidopsis thaliana] (TAIR:AT2G27970.1); similar to hypothetical protein [Ipomoea tri	0	1	0	0	1	0	0	2	0	0.879851	0.590754
AT2G28060	protein_coding	protein kinase-related		similar to 5'-AMP-activated protein kinase beta-2 subunit, putative [Arabidopsis thaliana] (TAIR:AT5G21170.2); similar to 5'-AMP-activated protein kinase beta-2 subunit, putative [Arabidopsis thaliana] (TAIR:AT5G21170.1); similar to unnamed protein produc	0	1	0	0	0	#DIV/0!	0	1	0	0.970897	0.763179
AT2G28650	protein_coding	ATEXO70H8 (exocyst subunit EXO70 family protein H8); protein binding	A member of EXO70 gene family, putative exocyst subunits, conserved in land plants. Arabidopsis thaliana contains 23 putative EXO70 genes, which can be classified into eight clusters on the phylogenetic tree.	similar to ATEXO70H5 (exocyst subunit EXO70 family protein H5), protein binding [Arabidopsis thaliana] (TAIR:AT2G28640.1); similar to hypothetical protein [Vitis vinifera] (GB:CAN66786.1); similar to unnamed protein product [Vitis vinifera] (GB:CAO21731.1	0	0	#DIV/0!	0	4	0	0	4	0	1.29505	0.317919
AT2G28800	protein_coding	ALB3 (ALBINO 3); P-P-bond-hydrolysis-driven protein transmembrane transporter	member of Chloroplast membrane protein ALBINO3 family	Identical to Inner membrane protein ALBINO3, chloroplast precursor (ALB3) [Arabidopsis Thaliana] (GB:Q8LBP4;GB:O04665); similar to ALB4 (ALBINA 4) [Arabidopsis thaliana] (TAIR:AT1G24490.1); similar to chloroplast PPF-1 [Poncirus trifoliata] (GB:ABU75304.1	0	0	#DIV/0!	0	1	0	0	1	0	1.19462	0.590109
AT2G28910	protein_coding	CXIP4 (CAX INTERACTING PROTEIN 4); nucleic acid binding / zinc ion binding	Encodes a CAX-interacting protein (CXIP4). The gene product is located in the nucleus of GFP-CXIP4-expressing yeast cells. When transiently expressed in the tobacco leaves, GFP-CXIP4 locates to the nucleus as well as in discrete areas of the cytoplasm (wh	Identical to CAX-interacting protein 4 (CXIP4) [Arabidopsis Thaliana] (GB:Q84Y18;GB:Q8L8W3;GB:Q9ZV23); similar to predicted protein [Physcomitrella patens subsp. patens] (GB:EDQ71503.1); contains InterPro domain Zinc finger, CCHC-type; (InterPro:IPR001878	0	1	0	0	0	#DIV/0!	0	1	0	0.940163	0.553629
AT2G28940	protein_coding	protein kinase family protein		similar to protein kinase, putative [Arabidopsis thaliana] (TAIR:AT3G09830.1); similar to protein kinase, putative [Arabidopsis thaliana] (TAIR:AT3G09830.2); similar to unnamed protein product [Vitis vinifera] (GB:CAO21647.1); contains InterPro domain Pro	0	0	#DIV/0!	0	1	0	0	1	0	0.714884	0.103384
AT2G29330	protein_coding	TRI (TROPINONE REDUCTASE); oxidoreductase		similar to tropinone reductase, putative / tropine dehydrogenase, putative [Arabidopsis thaliana] (TAIR:AT2G30670.1); similar to hypothetical protein [Vitis vinifera] (GB:CAN63543.1); similar to tropinone reductase [Cochlearia officinalis] (GB:CAO02390.1)	0	3	0	0	0	#DIV/0!	0	3	0	0.950193	0.624397
AT2G29400	protein_coding	TOPP1 (TYPE ONE PROTEIN PHOSPHATASE 1); protein serine/threonine phosphatase	Type 1 protein phosphatase, expressed in roots, rosettes and flowers	Identical to Serine/threonine-protein phosphatase PP1 isozyme 1 (TOPP1) [Arabidopsis Thaliana] (GB:P30366); similar to TOPP2 (Type one serine/threonine protein phosphatase 2), protein serine/threonine phosphatase [Arabidopsis thaliana] (TAIR:AT5G59160.3)	0	1	0	0	1	0	0	2	0	0.987918	0.964257
AT2G29670	protein_coding	binding		similar to binding [Arabidopsis thaliana] (TAIR:AT1G07280.3); similar to binding [Arabidopsis thaliana] (TAIR:AT1G07280.2); similar to binding [Arabidopsis thaliana] (TAIR:AT1G07280.1); similar to hypothetical protein [Vitis vinifera] (GB:CAN79749.1); con	0	0	#DIV/0!	0	1	0	0	1	0	0.752025	0.0653547
AT2G29730	protein_coding	UDP-glucoronosyl/UDP-glucosyl transferase family protein		similar to UDP-glucoronosyl/UDP-glucosyl transferase family protein [Arabidopsis thaliana] (TAIR:AT2G29710.1); similar to hypothetical protein [Vitis vinifera] (GB:CAN76057.1); similar to unnamed protein product [Vitis vinifera] (GB:CAO21484.1); similar t	0	0	#DIV/0!	0	1	0	0	1	0	0.573436	0.224035
AT2G29980	protein_coding	FAD3 (FATTY ACID DESATURASE 3); omega-3 fatty acid desaturase	Endoplasmic reticulum enzyme responsible for the synthesis of 18:3 fatty acids from phospholipids. Uses cytochrome b5 as electron donor.	Identical to Omega-3 fatty acid desaturase, endoplasmic reticulum (FAD3) [Arabidopsis Thaliana] (GB:P48623); similar to FAD8 (FATTY ACID DESATURASE 8), omega-3 fatty acid desaturase [Arabidopsis thaliana] (TAIR:AT5G05580.1); similar to Omega-3 fatty acid	0	0	#DIV/0!	0	1	0	0	1	0	0.805304	0.549874
AT2G30090	protein_coding	GCN5-related N-acetyltransferase (GNAT) family protein		similar to HLS1 (HOOKLESS 1), N-acetyltransferase [Arabidopsis thaliana] (TAIR:AT4G37580.1); similar to unnamed protein product [Vitis vinifera] (GB:CAO21420.1); contains InterPro domain Acyl-CoA N-acyltransferase (InterPro:IPR016181); contains InterPro d	0	0	#DIV/0!	0	1	0	0	1	0	1.30091	0.555299
AT2G30170	protein_coding	catalytic		similar to 5-azacytidine resistance protein -related [Arabidopsis thaliana] (TAIR:AT5G66720.2); similar to 5-azacytidine resistance protein -related [Arabidopsis thaliana] (TAIR:AT5G66720.1); similar to unnamed protein product [Vitis vinifera] (GB:CAO2137	0	0	#DIV/0!	0	1	0	0	1	0	0.910496	0.401446
AT2G30200	protein_coding	[acyl-carrier-protein] S-malonyltransferase/ binding / catalytic/ transferase		similar to [acyl-carrier protein] S-malonyltransferase [Brassica napus] (GB:CAB45522.1); contains InterPro domain Malonyl-CoA ACP transacylase, ACP-binding; (InterPro:IPR016036); contains InterPro domain Malonyl CoA-acyl carrier protein transacylase; (Int	0	0	#DIV/0!	0	1	0	0	1	0	1.55177	0.108212
AT2G30300	protein_coding	nodulin-related		similar to nodulin family protein [Arabidopsis thaliana] (TAIR:AT2G16660.1); similar to unnamed protein product [Vitis vinifera] (GB:CAO21343.1); contains InterPro domain Major facilitator superfamily MFS-1 (InterPro:IPR011701); contains InterPro domain M	0	1	0	0	0	#DIV/0!	0	1	0	1.03389	0.665108
AT2G30350	protein_coding	endo/excinuclease amino terminal domain-containing protein		similar to unnamed protein product [Vitis vinifera] (GB:CAO21328.1); contains domain PTHR20208 (PTHR20208); contains domain PTHR20208:SF5 (PTHR20208:SF5)	0	1	0	0	1	0	0	2	0	1.10813	0.216342
AT2G30410	protein_coding	KIS (KIESEL); unfolded protein binding	mutant has embryo defect; enlarged embryo cells and endosperm nuclei; Tubulin Folding Cofactor A	Identical to Tubulin-specific chaperone A [Arabidopsis Thaliana] (GB:O04350;GB:Q949R2); similar to hypothetical protein [Vitis vinifera] (GB:CAN82778.1); contains InterPro domain Tubulin binding cofactor A; (InterPro:IPR004226)	0	1	0	0	1	0	0	2	0	0.890681	0.269263
AT2G30470	protein_coding	HSI2 (HIGH-LEVEL EXPRESSION OF SUGAR-INDUCIBLE GENE 2); transcription factor/ transcription repressor	HSI2 is a member of a novel family of B3 domain proteins with a sequence similar to the ERF-associated amphiphilic repression (EAR) motif. It functions as an active repressor of the Spo minimal promoter (derived from a gene for sweet potato sporamin A1) t	similar to HSI2-L1/HSL1 (HSI2-LIKE 1), transcription factor [Arabidopsis thaliana] (TAIR:AT4G32010.1); similar to unnamed protein product [Vitis vinifera] (GB:CAO48871.1); contains InterPro domain Transcriptional factor B3; (InterPro:IPR003340); contains	0	1	0	0	0	#DIV/0!	0	1	0	1.18493	0.478525
AT2G30520	protein_coding	RPT2 (ROOT PHOTOTROPISM 2); protein binding	light inducible root phototropism 2 encoding a signal transducer of the phototropic response in Arabidopsis	Identical to Root phototropism protein 2 (RPT2) [Arabidopsis Thaliana] (GB:Q682S0;GB:O04343;GB:O04344;GB:Q93VA6;GB:Q9M6N8); similar to signal transducer [Arabidopsis thaliana] (TAIR:AT5G67385.1); similar to unnamed protein product [Vitis vinifera] (GB:CAO	0	1	0	0	0	#DIV/0!	0	1	0	1.26078	0.418378
AT2G30530	protein_coding			similar to unknown protein [Arabidopsis thaliana] (TAIR:AT5G01970.1); similar to unnamed protein product [Vitis vinifera] (GB:CAO21287.1)	0	1	0	0	1	0	0	2	0	0.989125	0.83139
AT2G30590	protein_coding	WRKY21 (WRKY DNA-binding protein 21); transcription factor	Encodes WRKY DNA-binding protein 21 (WRKY21).	Identical to Probable WRKY transcription factor 21 (WRKY21) [Arabidopsis Thaliana] (GB:O04336); similar to WRKY74 (WRKY DNA-binding protein 74), transcription factor [Arabidopsis thaliana] (TAIR:AT5G28650.1); similar to unnamed protein product [Vitis vin	0	0	#DIV/0!	0	1	0	0	1	0	0.986804	0.803595
AT2G30700	protein_coding			similar to unknown protein [Arabidopsis thaliana] (TAIR:AT1G61900.1); similar to hypothetical protein [Vitis vinifera] (GB:CAN82818.1)	0	1	0	0	0	#DIV/0!	0	1	0
AT2G30740	protein_coding	serine/threonine protein kinase, putative		similar to serine/threonine protein kinase, putative [Arabidopsis thaliana] (TAIR:AT1G06700.1); similar to serine/threonine protein kinase, putative [Arabidopsis thaliana] (TAIR:AT1G06700.2); similar to protein kinase Pti1 [Glycine max] (GB:AAO92595.1); c	0	0	#DIV/0!	0	1	0	0	1	0	1.44474	0.246303
AT2G30970	protein_coding	ASP1 (ASPARTATE AMINOTRANSFERASE 1)	ASPARTATE AMINOTRANSFERASE 1	Identical to Aspartate aminotransferase, mitochondrial precursor (ASP1) [Arabidopsis Thaliana] (GB:P46643); similar to ASP2 (ASPARTATE AMINOTRANSFERASE 2) [Arabidopsis thaliana] (TAIR:AT5G19550.1); similar to unnamed protein product [Vitis vinifera] (GB:	0	1	0	0	0	#DIV/0!	0	1	0	0.707139	0.0676799
AT2G31040	protein_coding	ATP synthase protein I -related		similar to unknown [Populus trichocarpa x Populus deltoides] (GB:ABK96598.1); contains domain PD015638 (PD015638)	0	0	#DIV/0!	0	1	0	0	1	0	0.821422	0.468449
AT2G31270	protein_coding	ATCDT1A/CDT1/CDT1A (ARABIDOPSIS HOMOLOG OF YEAST CDT1 A); cyclin-dependent protein kinase/ protein binding	Encodes a cyclin-dependent protein kinase. Involved in nuclear DNA replication and plastid division. Located in nucleus and chloroplast.	similar to ATCDT1B/CDT1/CDT1B (ARABIDOPSIS HOMOLOG OF YEAST CDT1 B), cyclin-dependent protein kinase [Arabidopsis thaliana] (TAIR:AT3G54710.1); similar to unnamed protein product [Vitis vinifera] (GB:CAO70694.1); contains InterPro domain DNA replication f	0	1	0	0	0	#DIV/0!	0	1	0	0.872456	0.123491
AT2G31350	protein_coding	GLX2-5 (GLYOXALASE 2-5); hydroxyacylglutathione hydrolase/ iron ion binding / zinc ion binding	Encodes a mitochondrial glyoxalase 2 that can accommodate a number of different metal centers and with the predominant metal center being Fe(III)Zn(II).	Identical to Putative hydroxyacylglutathione hydrolase 2, mitochondrial precursor [Arabidopsis Thaliana] (GB:Q9SID3;GB:Q3EBQ9); similar to GLX2-4 (GLYOXALASE 2-4), hydroxyacylglutathione hydrolase [Arabidopsis thaliana] (TAIR:AT1G06130.1); similar to unk	0	0	#DIV/0!	0	1	0	0	1	0	0.920237	0.469418
AT2G31370	protein_coding	bZIP transcription factor (POSF21)		Identical to Probable transcription factor PosF21 (POSF21) [Arabidopsis Thaliana] (GB:Q04088); similar to bZIP transcription factor, putative (bZIP69) [Arabidopsis thaliana] (TAIR:AT1G06070.1); similar to unnamed protein product [Vitis vinifera] (GB:CAO1	0	1	0	0	0	#DIV/0!	0	1	0	1.06825	0.465723
AT2G31490	protein_coding			similar to unknown [Populus trichocarpa] (GB:ABK96039.1)	0	4	0	0	0	#DIV/0!	0	4	0	0.801679	0.0884185
AT2G31750	protein_coding	UGT74D1 (UDP-GLUCOSYL TRANSFERASE 74D1); UDP-glycosyltransferase/ abscisic acid glucosyltransferase/ transferase, transferring glycosyl groups / transferase, transferring hexosyl groups		similar to UDP-glucoronosyl/UDP-glucosyl transferase family protein [Arabidopsis thaliana] (TAIR:AT1G05680.1); similar to unnamed protein product [Vitis vinifera] (GB:CAO46327.1); contains InterPro domain UDP-glucuronosyl/UDP-glucosyltransferase; (InterPr	0	0	#DIV/0!	0	1	0	0	1	0	0.583388	0.0014895
AT2G32150	protein_coding	haloacid dehalogenase-like hydrolase family protein		similar to haloacid dehalogenase-like hydrolase family protein [Arabidopsis thaliana] (TAIR:AT5G02230.1); similar to haloacid dehalogenase-like hydrolase family protein [Arabidopsis thaliana] (TAIR:AT5G02230.2); similar to unknown [Populus trichocarpa] (G	0	1	0	0	0	#DIV/0!	0	1	0	1.06997	0.759102
AT2G32260	protein_coding	cholinephosphate cytidylyltransferase, putative / phosphorylcholine transferase, putative / CTP:phosphocholine cytidylyltransferase, putative		similar to cholinephosphate cytidylyltransferase, putative / phosphorylcholine transferase, putative / CTP:phosphocholine cytidylyltransferase, putative [Arabidopsis thaliana] (TAIR:AT4G15130.1); similar to CTP:phosphocholine cytidylyltransferase [Brassic	0	0	#DIV/0!	0	2	0	0	2	0	0.921698	0.731688
AT2G32710	protein_coding	KRP4 (KIP-RELATED PROTEIN 4)	Kip-related protein (KRP) gene, encodes CDK (cyclin-dependent kinase) inhibitor (CKI). A member of seven KRP genes found in Arabidopsis thaliana. Negative regulator of cell division. Expressed in actively dividing cells.	Identical to Cyclin-dependent kinase inhibitor 4 (KRP4) [Arabidopsis Thaliana] (GB:Q8GYJ3;GB:O48846;GB:Q94CM0;GB:Q9FR83); similar to ICK6/KRP3 (KIP-RELATED PROTEIN 3), cyclin binding / cyclin-dependent protein kinase inhibitor [Arabidopsis thaliana] (TAI	0	0	#DIV/0!	0	1	0	0	1	0	0.991417	0.970725
AT2G32730	protein_coding	26S proteasome regulatory subunit, putative		similar to 26S proteasome regulatory subunit, putative [Arabidopsis thaliana] (TAIR:AT1G04810.1); similar to hypothetical protein [Vitis vinifera] (GB:CAN81101.1); similar to unnamed protein product [Vitis vinifera] (GB:CAO44405.1); similar to 26S proteas	0	1	0	0	1	0	0	2	0	0.818622	0.0452789
AT2G32810	protein_coding	BGAL9 (BETA GALACTOSIDASE 9); beta-galactosidase	putative beta-galactosidase	Identical to Beta-galactosidase 9 precursor (BGAL9) [Arabidopsis Thaliana] (GB:Q9SCV3;GB:O48836); similar to BGAL8 (BETA-GALACTOSIDASE 8), beta-galactosidase [Arabidopsis thaliana] (TAIR:AT2G28470.1); similar to BGAL1 (BETA GALACTOSIDASE 1), beta-galacto	0	1	0	0	0	#DIV/0!	0	1	0	1.05484	0.695156
AT2G33040	protein_coding	ATP synthase gamma chain, mitochondrial (ATPC)		Identical to ATP synthase subunit gamma, mitochondrial precursor (ATPC) [Arabidopsis Thaliana] (GB:Q96250); similar to ATPC1 (ATP synthase gamma chain 1) [Arabidopsis thaliana] (TAIR:AT4G04640.1); similar to unnamed protein product [Vitis vinifera] (GB:CA	0	0	#DIV/0!	0	2	0	0	2	0	0.770626	0.0726481
AT2G33080	protein_coding	leucine-rich repeat family protein		similar to leucine-rich repeat family protein [Arabidopsis thaliana] (TAIR:AT2G33020.1); similar to leucine-rich repeat family protein [Arabidopsis thaliana] (TAIR:AT2G33060.1); similar to disease resistance family protein [Arabidopsis thaliana] (TAIR:AT2	0	1	0	0	0	#DIV/0!	0	1	0	1.19874	0.0759082
AT2G33150	protein_coding	KAT2/PED1 (PEROXISOME DEFECTIVE 1); acetyl-CoA C-acyltransferase	Encodes an organellar (peroxisome, glyoxysome) 3-ketoacyl-CoA thiolase, involved in fatty acid b-oxidation during germination and subsequent seedling growth. Mutants have defects in glyoxysomal fatty acid beta-oxidation.	Identical to 3-ketoacyl-CoA thiolase 2, peroxisomal precursor (PED1) [Arabidopsis Thaliana] (GB:Q56WD9;GB:Q93Z35;GB:Q9S7M3); similar to acetyl-CoA C-acyltransferase, putative / 3-ketoacyl-CoA thiolase, putative [Arabidopsis thaliana] (TAIR:AT1G04710.1);	0	1	0	0	2	0	0	3	0	0.82061	0.280584
AT2G33170	protein_coding	leucine-rich repeat transmembrane protein kinase, putative		similar to protein binding / protein kinase [Arabidopsis thaliana] (TAIR:AT1G17230.1); similar to leucine-rich repeat transmembrane protein kinase, putative [Arabidopsis thaliana] (TAIR:AT5G63930.1); similar to leucine-rich repeat protein kinase, putative	0	0	#DIV/0!	0	1	0	0	1	0	0.776484	0.0144226
AT2G33450	protein_coding	50S ribosomal protein L28, chloroplast (CL28)		Identical to 50S ribosomal protein L28, chloroplast precursor (RPL28) [Arabidopsis Thaliana] (GB:O22795;GB:Q8VY79); similar to unknown [Populus trichocarpa x Populus deltoides] (GB:ABK96762.1); contains InterPro domain Ribosomal protein L28; (InterPro:IP	0	1	0	0	0	#DIV/0!	0	1	0	1.02382	0.946105
AT2G33470	protein_coding	GLTP1 (GLYCOLIPID TRANSFER PROTEIN 1); glycolipid binding / glycolipid transporter		similar to GLTP3 (GLYCOLIPID TRANSFER PROTEIN 3), glycolipid binding / glycolipid transporter [Arabidopsis thaliana] (TAIR:AT3G21260.2); similar to unnamed protein product [Vitis vinifera] (GB:CAO71432.1); contains InterPro domain Glycolipid transfer prot	0	2	0	0	0	#DIV/0!	0	2	0	0.901294	0.451816
AT2G33480	protein_coding	ANAC041 (Arabidopsis NAC domain containing protein 41); transcription factor		similar to ANAC083 (Arabidopsis NAC domain containing protein 83), transcription factor [Arabidopsis thaliana] (TAIR:AT5G13180.1); similar to unnamed protein product [Vitis vinifera] (GB:CAO70079.1); contains InterPro domain No apical meristem (NAM) prote	0	0	#DIV/0!	0	1	0	0	1	0	1.41808	0.0267055
AT2G33510	protein_coding	protein binding		similar to protein binding [Arabidopsis thaliana] (TAIR:AT1G28070.1); similar to unnamed protein product [Vitis vinifera] (GB:CAO70065.1); contains InterPro domain WW/Rsp5/WWP; (InterPro:IPR001202)	0	0	#DIV/0!	0	1	0	0	1	0
AT2G33590	protein_coding	cinnamoyl-CoA reductase family		similar to cinnamoyl-CoA reductase family [Arabidopsis thaliana] (TAIR:AT2G33600.1); similar to unnamed protein product [Vitis vinifera] (GB:CAO66289.1); contains InterPro domain NAD-dependent epimerase/dehydratase; (InterPro:IPR001509); contains InterPro	0	1	0	0	1	0	0	2	0	0.82439	0.259622
AT2G33700	protein_coding	protein phosphatase 2C, putative / PP2C, putative		similar to protein phosphatase 2C, putative / PP2C, putative [Arabidopsis thaliana] (TAIR:AT3G51470.1); similar to unnamed protein product [Vitis vinifera] (GB:CAO66259.1); contains InterPro domain Protein phosphatase 2C-related; (InterPro:IPR001932); con	0	0	#DIV/0!	0	1	0	0	1	0	1.03744	0.798627
AT2G33740	protein_coding	CUTA	encodes a copper binding protein that forms tetramers in vitro. Gene is expressed in all tissues examined and protein is localized to the chloroplast.	Identical to Protein CutA, chloroplast precursor (CUTA) [Arabidopsis Thaliana] (GB:P93009;GB:Q147J1;GB:Q9C5X6); similar to unnamed protein product [Vitis vinifera] (GB:CAO61631.1); contains InterPro domain Divalent ion tolerance protein, CutA1; (InterPro	0	1	0	0	0	#DIV/0!	0	1	0	1.33762	0.00626166
AT2G33770	protein_coding	ATUBC24/PHO2/UBC24 (PHOSPHATE 2); ubiquitin-protein ligase	Encodes a ubiquitin-conjugating E2 enzyme. UBC24 mRNA accumulation is suppressed by miR399f, miR399b and miR399c. Involved in phosphate starvation response.	similar to PFU2/UBC23 (UBIQUITIN-CONJUGATING ENZYME 23), ubiquitin-protein ligase [Arabidopsis thaliana] (TAIR:AT2G16920.1); similar to hypothetical protein OsI_020215 [Oryza sativa (indica cultivar-group)] (GB:EAY98982.1); similar to unnamed protein prod	0	1	0	0	1	0	0	2	0	0.444136	0.00399843
AT2G34050	protein_coding			similar to unnamed protein product [Vitis vinifera] (GB:CAO66363.1); contains InterPro domain ATP11; (InterPro:IPR010591)	0	1	0	0	0	#DIV/0!	0	1	0	0.822613	0.12413
AT2G34160	protein_coding	nucleic acid binding		Identical to Uncharacterized protein At2g34160 [Arabidopsis Thaliana] (GB:O22969); similar to nucleic acid binding [Arabidopsis thaliana] (TAIR:AT1G29250.1); similar to unnamed protein product [Vitis vinifera] (GB:CAO65645.1); contains InterPro domain Unc	0	0	#DIV/0!	0	1	0	0	1	0	0.996758	0.971995
AT2G34350	protein_coding	nodulin-related		similar to nodulin-related [Arabidopsis thaliana] (TAIR:AT2G34355.1); similar to unnamed protein product [Vitis vinifera] (GB:CAO62483.1); contains InterPro domain Major facilitator superfamily; (InterPro:IPR007114); contains InterPro domain MFS general s	0	0	#DIV/0!	0	1	0	0	1	0	0.993764	0.980573
AT2G34480	protein_coding	60S ribosomal protein L18A (RPL18aB)		Identical to 60S ribosomal protein L18a-2 (RPL18AB) [Arabidopsis Thaliana] (GB:P51418;GB:O64699); similar to 60S ribosomal protein L18A (RPL18aC) [Arabidopsis thaliana] (TAIR:AT3G14600.1); similar to unknown [Populus trichocarpa] (GB:ABK93710.1); contains	0	1	0	0	0	#DIV/0!	0	1	0	0.921679	0.76768
AT2G34690	protein_coding	ACD11 (ACCELERATED CELL DEATH 11)	Gene product transports the glycolipid precursor sphingosine between membranes in vitro. Mutant constitutively expresses defense-related genes that accompany the hypersensitive response normally triggered by avirulent pathogens.	similar to glycolipid binding / glycolipid transporter [Arabidopsis thaliana] (TAIR:AT4G39670.1); similar to unnamed protein product [Vitis vinifera] (GB:CAO40411.1); contains InterPro domain Glycolipid transfer protein, GLTP; (InterPro:IPR014830)	0	0	#DIV/0!	0	2	0	0	2	0	0.903135	0.15523
AT2G34860	protein_coding	EDA3 (embryo sac development arrest 3); heat shock protein binding / unfolded protein binding		similar to unnamed protein product [Vitis vinifera] (GB:CAO22019.1); contains InterPro domain Heat shock protein DnaJ, cysteine-rich region; (InterPro:IPR001305)	0	0	#DIV/0!	0	1	0	0	1	0	1.14494	0.462834
AT2G34900	protein_coding	IMB1 (IMBIBITION-INDUCIBLE 1); DNA binding	Encodes a member of the BET subgroup of bromodomain proteins, a novel class of putative transcription factors. Its expression is induced during seed imbibition and downregulated during germination. Seeds of a loss-of-function mutant allele, imb1, show im	similar to GTE6 (GENERAL TRANSCRIPTION FACTOR GROUP E6), DNA binding [Arabidopsis thaliana] (TAIR:AT3G52280.1); similar to unnamed protein product [Vitis vinifera] (GB:CAO65993.1); contains InterPro domain Bromodomain (InterPro:IPR001487); contains InterP	0	0	#DIV/0!	0	1	0	0	1	0	0.905489	0.678128
AT2G35050	protein_coding	protein kinase family protein		similar to protein kinase family protein [Arabidopsis thaliana] (TAIR:AT1G16270.1); similar to unnamed protein product [Vitis vinifera] (GB:CAO41957.1); similar to hypothetical protein [Vitis vinifera] (GB:CAN65102.1); contains InterPro domain Protein kin	0	0	#DIV/0!	0	2	0	0	2	0	1.15355	0.407094
AT2G35060	protein_coding	KUP11 (K+ uptake permease 11); potassium ion transmembrane transporter	potassium transporter	Identical to Potassium transporter 11 (POT11) [Arabidopsis Thaliana] (GB:O64769); similar to potassium ion transmembrane transporter [Arabidopsis thaliana] (TAIR:AT4G19960.1); similar to KUP10 (K+ transporter 10), potassium ion transmembrane transporter	0	0	#DIV/0!	0	1	0	0	1	0	1.08261	0.795422
AT2G35120	protein_coding	glycine cleavage system H protein, mitochondrial, putative		similar to glycine cleavage system H protein, mitochondrial, putative [Arabidopsis thaliana] (TAIR:AT1G32470.1); similar to unnamed protein product [Vitis vinifera] (GB:CAO42006.1); similar to 2-oxo acid dehydrogenase, lipoyl-binding site [Medicago trunca	0	0	#DIV/0!	0	1	0	0	1	0	0.747064	0.143358
AT2G35160	protein_coding	SUVH5 (SU(VAR)3-9 HOMOLOG 5)	Encodes SU(var)3-9 homologue 5 (SUVH5). SUVH5 has histone methyltransferase (MTase) activity in vitro and contributes to the maintenance of H3 mK9 (methylation of histone H3 at Lys-9) and CMT3-mediated non-CG methylation in vivo.	Identical to Histone-lysine N-methyltransferase, H3 lysine-9 specific SUVH5 (SUVH5) [Arabidopsis Thaliana] (GB:O82175); similar to SUVH6 (SU(VAR)3-9 HOMOLOG 6) [Arabidopsis thaliana] (TAIR:AT2G22740.2); similar to SUVH6 (SU(VAR)3-9 HOMOLOG 6) [Arabidopsi	0	0	#DIV/0!	0	1	0	0	1	0	1.26644	0.188426
AT2G35530	protein_coding	bZIP transcription factor family protein		similar to bZIP transcription factor family protein [Arabidopsis thaliana] (TAIR:AT1G32150.1); similar to hypothetical protein [Vitis vinifera] (GB:CAN81625.1); contains InterPro domain G-box binding, MFMR; (InterPro:IPR012900); contains InterPro domain b	0	1	0	0	0	#DIV/0!	0	1	0	1.0028	0.991552
AT2G35800	protein_coding	mitochondrial substrate carrier family protein		similar to binding [Arabidopsis thaliana] (TAIR:AT2G26360.1); similar to unnamed protein product [Vitis vinifera] (GB:CAO68989.1); similar to Os12g0103000 [Oryza sativa (japonica cultivar-group)] (GB:NP_001065240.1); similar to Os11g0103700 [Oryza sativa	0	0	#DIV/0!	0	1	0	0	1	0	1.14417	0.600785
AT2G36200	protein_coding	kinesin motor protein-related		Identical to Probable 125 kDa kinesin-related protein [Arabidopsis Thaliana] (GB:P82266); similar to kinesin motor protein-related [Arabidopsis thaliana] (TAIR:AT2G37420.1); similar to kinesin motor protein-related [Arabidopsis thaliana] (TAIR:AT2G28620.1	0	0	#DIV/0!	0	1	0	0	1	0	1.14031	0.391954
AT2G36310	protein_coding	inosine-uridine preferring nucleoside hydrolase family protein		similar to inosine-uridine preferring nucleoside hydrolase family protein [Arabidopsis thaliana] (TAIR:AT1G05620.1); similar to hypothetical protein LOC542168 [Zea mays] (GB:NP_001105259.1); contains InterPro domain Inosine/uridine-preferring nucleoside h	0	1	0	0	0	#DIV/0!	0	1	0	1.00128	0.986012
AT2G36690	protein_coding	oxidoreductase, 2OG-Fe(II) oxygenase family protein		similar to oxidoreductase, acting on paired donors, with incorporation or reduction of molecular oxygen, 2-oxoglutarate as one donor, and incorporation of one atom each of oxygen into both donors [Arabidopsis thaliana] (TAIR:AT3G60290.1); similar to unnam	0	0	#DIV/0!	0	1	0	0	1	0	1.96511	0.207739
AT2G36890	protein_coding	ATMYB38/MYB38/RAX2 (myb domain protein 38); DNA binding / transcription factor	Putative homolog of the Blind gene in tomato. Together with RAX1 and RAX3 belong to the class R2R3 MYB genes; encoded by the Myb-like transcription factor MYB38, regulates axillary meristem formation.	Identical to Protein REGULATOR OF AXILLARY MERISTEMS 2 (RAX2) [Arabidopsis Thaliana] (GB:Q9SJL7;GB:A5YZ54;GB:A5YZ55;GB:A5YZ66;GB:Q6R0A1;GB:Q9ZTE4); similar to ATMYB37/MYB37/RAX1 (myb domain protein 37), DNA binding / transcription factor [Arabidopsis tha	0	0	#DIV/0!	0	1	0	0	1	0	0.902876	0.505698
AT2G36930	protein_coding	zinc finger (C2H2 type) family protein		similar to unknown [Picea sitchensis] (GB:ABK23952.1); contains InterPro domain Zinc finger, C2H2-like; (InterPro:IPR015880); contains InterPro domain Zinc finger, C2H2-type; (InterPro:IPR007087); contains InterPro domain Zinc finger, U1-type; (InterPro:I	0	0	#DIV/0!	0	1	0	0	1	0	0.92692	0.745505
AT2G37150	protein_coding	zinc finger (C3HC4-type RING finger) family protein		similar to zinc finger (C3HC4-type RING finger) family protein [Arabidopsis thaliana] (TAIR:AT4G34040.1); similar to hypothetical protein [Vitis vinifera] (GB:CAN80846.1); contains InterPro domain Zinc finger, RING/FYVE/PHD-type (InterPro:IPR013083); cont	0	0	#DIV/0!	0	1	0	0	1	0	0.974751	0.851681
AT2G37280	protein_coding	ATPDR5/PDR5 (PLEIOTROPIC DRUG RESISTANCE 5); ATPase, coupled to transmembrane movement of substances		Identical to Probable pleiotropic drug resistance protein 5 (PDR5) [Arabidopsis Thaliana] (GB:Q9ZUT8); similar to ATPDR9/PDR9 (PLEIOTROPIC DRUG RESISTANCE 9), ATPase, coupled to transmembrane movement of substances [Arabidopsis thaliana] (TAIR:AT3G53480.1	0	1	0	0	0	#DIV/0!	0	1	0	1.54722	0.103567
AT2G38050	protein_coding	DET2 (DE-ETIOLATED 2)	Similar to mammalian steroid-5-alpha-reductase. Involved in the brassinolide biosynthetic pathway.	Identical to Probable steroid reductase DET2 (DET2) [Arabidopsis Thaliana] (GB:Q38944;GB:Q9SH83); similar to 3-oxo-5-alpha-steroid 4-dehydrogenase family protein / steroid 5-alpha-reductase family protein [Arabidopsis thaliana] (TAIR:AT5G16010.1); simila	0	0	#DIV/0!	0	1	0	0	1	0	1.16285	0.582336
AT2G38110	protein_coding	ATGPAT6/GPAT6 (GLYCEROL-3-PHOSPHATE ACYLTRANSFERASE 6); 1-acylglycerol-3-phosphate O-acyltransferase/ acyltransferase	Encodes a protein with glycerol-3-phosphate acyltransferase activity.	Identical to Glycerol-3-phosphate acyltransferase 6 (GPAT6) [Arabidopsis Thaliana] (GB:O80437); similar to GPAT8 (GLYCEROL-3-PHOSPHATE ACYLTRANSFERASE 8), acyltransferase/ glycerol-3-phosphate O-acyltransferase [Arabidopsis thaliana] (TAIR:AT4G00400.1);	0	0	#DIV/0!	0	1	0	0	1	0	0.69555	0.174474
AT2G38380	protein_coding	peroxidase 22 (PER22) (P22) (PRXEA) / basic peroxidase E		Identical to Peroxidase 22 precursor (PER22) [Arabidopsis Thaliana] (GB:P24102;GB:O80913); similar to peroxidase, putative [Arabidopsis thaliana] (TAIR:AT2G38390.1); similar to Peroxidase C3 precursor (GB:P17180); contains InterPro domain Plant peroxidas	0	1	0	0	0	#DIV/0!	0	1	0
AT2G38400	protein_coding	AGT3 (ALANINE:GLYOXYLATE AMINOTRANSFERASE 3); alanine-glyoxylate transaminase	alanine:glyoxylate aminotransferase 2 homolog (AGT3) mRNA,	Identical to Alanine--glyoxylate aminotransferase 2 homolog 2, mitochondrial precursor (AGT3) [Arabidopsis Thaliana] (GB:Q94AL9;GB:O80911); similar to alanine--glyoxylate aminotransferase, putative / beta-alanine-pyruvate aminotransferase, putative / AGT	0	0	#DIV/0!	0	1	0	0	1	0	0.700716	0.163189
AT2G38450	protein_coding	binding		similar to unknown protein [Arabidopsis thaliana] (TAIR:AT5G05360.1); similar to unnamed protein product [Vitis vinifera] (GB:CAO48811.1); contains InterPro domain Sel1-like (InterPro:IPR006597)	0	1	0	0	0	#DIV/0!	0	1	0	1.04958	0.876613
AT2G38480	protein_coding	integral membrane protein, putative		Identical to UPF0497 membrane protein At2g38480 [Arabidopsis Thaliana] (GB:Q8LE26;GB:O80903;GB:Q94K27); similar to unknown protein [Arabidopsis thaliana] (TAIR:AT2G36330.1); similar to unnamed protein product [Vitis vinifera] (GB:CAO48801.1); contains Int	0	0	#DIV/0!	0	1	0	0	1	0	1.18262	0.522026
AT2G38730	protein_coding	peptidyl-prolyl cis-trans isomerase, putative / cyclophilin, putative / rotamase, putative		similar to peptidyl-prolyl cis-trans isomerase / cyclophilin (CYP2) / rotamase [Arabidopsis thaliana] (TAIR:AT2G21130.1); similar to hypothetical protein [Vitis vinifera] (GB:CAN70281.1); contains InterPro domain Cyclophilin-like (InterPro:IPR015891); con	0	0	#DIV/0!	0	1	0	0	1	0	0.747162	0.243922
AT2G39140	protein_coding	pseudouridine synthase family protein		similar to unknown protein [Arabidopsis thaliana] (TAIR:AT3G43340.1); similar to unnamed protein product [Vitis vinifera] (GB:CAO68905.1); contains InterPro domain Pseudouridine synthase, Rsu; (InterPro:IPR000748); contains InterPro domain RNA-binding S4;	0	0	#DIV/0!	0	1	0	0	1	0	1.04831	0.462164
AT2G39270	protein_coding	adenylate kinase family protein		similar to ADK/ATPADK1 (ADENOSINE KINASE), adenylate kinase/ nucleotide kinase [Arabidopsis thaliana] (TAIR:AT2G37250.1); similar to unnamed protein product [Vitis vinifera] (GB:CAO41541.1); contains InterPro domain Adenylate kinase; (InterPro:IPR000850);	0	1	0	0	0	#DIV/0!	0	1	0
AT2G39570	protein_coding	ACT domain-containing protein		similar to ACT domain-containing protein [Arabidopsis thaliana] (TAIR:AT2G36840.1); similar to unnamed protein product [Vitis vinifera] (GB:CAO69235.1); contains InterPro domain Amino acid-binding ACT; (InterPro:IPR002912)	0	1	0	0	1	0	0	2	0	1.18419	0.565113
AT2G39580	protein_coding	binding		similar to unnamed protein product [Vitis vinifera] (GB:CAO69241.1); contains domain TPR-like (SSF48452)	0	0	#DIV/0!	0	1	0	0	1	0	1.10086	0.517532
AT2G39660	protein_coding	BIK1 (BOTRYTIS-INDUCED KINASE1); kinase	Encodes a plasma membrane-localized ser/thr protein kinase that is a crucial component of host response signaling required to activate the resistance responses to Botrytis and A. brassicicola infection. It is likely a negative regulator of salicylic acid	Identical to Serine/threonine-protein kinase BIK1 (BIK1) [Arabidopsis Thaliana] (GB:O48814); similar to protein kinase, putative [Arabidopsis thaliana] (TAIR:AT3G55450.1); similar to putative protein kinase APK1A [Trifolium pratense] (GB:BAE71262.1); con	0	1	0	0	0	#DIV/0!	0	1	0	0.864407	0.726809
AT2G39760	protein_coding	ATBPM3; protein binding		similar to ATBPM1 (BTB-POZ AND MATH DOMAIN 1), protein binding [Arabidopsis thaliana] (TAIR:AT5G19000.1); similar to unnamed protein product [Vitis vinifera] (GB:CAO69143.1); contains InterPro domain MATH (InterPro:IPR002083); contains InterPro domain TRA	0	0	#DIV/0!	0	1	0	0	1	0	0.942276	0.682496
AT2G39940	protein_coding	COI1 (CORONATINE INSENSITIVE 1); ubiquitin-protein ligase	Encodes a protein containing Leu-rich repeats and a degenerate F-box motif. Associates with AtCUL1, AtRbx1, and the Skp1-like proteins ASK1 and ASK2 to assemble SCF COI1 ubiquitin-ligase complexes in planta. A single amino acid substitution in the F-box	Identical to Coronatine-insensitive protein 1 (COI1) [Arabidopsis Thaliana] (GB:O04197); similar to TIR1 (TRANSPORT INHIBITOR RESPONSE 1), ubiquitin-protein ligase [Arabidopsis thaliana] (TAIR:AT3G62980.1); similar to coronatine-insensitive 1 [Lycopersic	0	0	#DIV/0!	0	1	0	0	1	0	1.07345	0.666218
AT2G39960	protein_coding	microsomal signal peptidase 25 kDa subunit, putative (SPC25)		Identical to Probable signal peptidase complex subunit 2 [Arabidopsis Thaliana] (GB:P58684); similar to signal peptidase [Arabidopsis thaliana] (TAIR:AT4G04200.1); similar to unknown [Populus trichocarpa] (GB:ABK95467.1); contains InterPro domain Microso	0	0	#DIV/0!	0	1	0	0	1	0	1.08342	0.197309
AT2G40030	protein_coding	NRPD1b (nuclear RNA polymerase D 1b); DNA binding / DNA-directed RNA polymerase	Encodes one of two alternative largest subunits of a putative plant-specific RNA polymerase IV (aka RNA polymerase D). Required for normal RNA-directed DNA methylation at non-CG methylation sites and transgene silencing.	similar to NRPD1a (NUCLEAR RNA POLYMERASE D 1A), DNA binding / DNA-directed RNA polymerase [Arabidopsis thaliana] (TAIR:AT1G63020.1); similar to DNA-directed RNA polymerase alpha subunit [Spinacia oleracea] (GB:AAX12374.1); similar to unnamed protein prod	0	1	0	0	0	#DIV/0!	0	1	0	1.09925	0.641293
AT2G40070	protein_coding			similar to proline-rich family protein [Arabidopsis thaliana] (TAIR:AT3G09000.1); similar to unnamed protein product [Vitis vinifera] (GB:CAO41342.1)	0	0	#DIV/0!	0	1	0	0	1	0	1.12709	0.514431
AT2G40095	protein_coding			similar to unknown protein [Arabidopsis thaliana] (TAIR:AT3G55880.2); similar to unnamed protein product [Vitis vinifera] (GB:CAO41350.1); contains domain PTHR10992 (PTHR10992); contains domain PTHR10992:SF2 (PTHR10992:SF2)	0	2	0	0	0	#DIV/0!	0	2	0
AT2G40180	protein_coding	ATHPP2C5; protein serine/threonine phosphatase		similar to protein phosphatase 2C, putative / PP2C, putative [Arabidopsis thaliana] (TAIR:AT2G30020.1); similar to unnamed protein product [Vitis vinifera] (GB:CAO21431.1); contains InterPro domain Protein phosphatase 2C-related; (InterPro:IPR001932); con	0	1	0	0	0	#DIV/0!	0	1	0	0.886896	0.00698278
AT2G40316	protein_coding			similar to unnamed protein product [Vitis vinifera] (GB:CAO41434.1); contains domain PD106563 (PD106563); contains domain PTHR15071 (PTHR15071)	0	0	#DIV/0!	0	1	0	0	1	0	1.09097	0.600487
AT2G40330	protein_coding	Bet v I allergen family protein		similar to unknown protein [Arabidopsis thaliana] (TAIR:AT2G38310.1); similar to unnamed protein product [Vitis vinifera] (GB:CAO48777.1); contains InterPro domain Streptomyces cyclase/dehydrase (InterPro:IPR005031)	0	0	#DIV/0!	0	2	0	0	2	0	1.05396	0.8457
AT2G40435	protein_coding	transcription regulator		similar to transcription regulator [Arabidopsis thaliana] (TAIR:AT3G56220.1); similar to unnamed protein product [Vitis vinifera] (GB:CAO41465.1); contains InterPro domain Helix-loop-helix DNA-binding; (InterPro:IPR011598)	0	1	0	0	0	#DIV/0!	0	1	0	2.12766	0.159058
AT2G40475	protein_coding	unknown protein			0	0	#DIV/0!	0	2	0	0	2	0	1.00442	0.984904
AT2G40620	protein_coding	bZIP transcription factor family protein		similar to ATBZIP52 (ARABIDOPSIS THALIANA BASIC LEUCINE ZIPPER 52), DNA binding / transcription factor [Arabidopsis thaliana] (TAIR:AT1G06850.1); similar to unnamed protein product [Vitis vinifera] (GB:CAO41502.1); contains InterPro domain bZIP transcript	0	0	#DIV/0!	0	1	0	0	1	0	0.638952	0.0301638
AT2G40800	protein_coding			similar to unknown protein [Arabidopsis thaliana] (TAIR:AT3G56430.1); similar to unnamed protein product [Vitis vinifera] (GB:CAO41325.1); contains InterPro domain Mitochondrial import inner membrane translocase, subunit Tim21 (InterPro:IPR013261)	0	0	#DIV/0!	0	1	0	0	1	0	0.964643	0.845549
AT2G40900	protein_coding	nodulin MtN21 family protein		similar to integral membrane family protein / nodulin MtN21-related [Arabidopsis thaliana] (TAIR:AT3G56620.1); similar to unnamed protein product [Vitis vinifera] (GB:CAO18247.1); contains InterPro domain Protein of unknown function DUF6, transmembrane; (	0	0	#DIV/0!	0	1	0	0	1	0	1.34712	0.313121
AT2G40940	protein_coding	ERS1 (ETHYLENE RESPONSE SENSOR 1); receptor	Ethylene receptor, subfamily 1. Has histidine kinase activity.	similar to ETR1 (ETHYLENE RESPONSE 1), two-component response regulator [Arabidopsis thaliana] (TAIR:AT1G66340.1); similar to ethylene receptor [Carica papaya] (GB:AAG41977.1); similar to ERS-like ethylene receptor [Pisum sativum] (GB:AAB94773.1); similar	0	0	#DIV/0!	0	1	0	0	1	0	0.989614	0.953261
AT2G40960	protein_coding	nucleic acid binding		similar to nucleic acid binding [Arabidopsis thaliana] (TAIR:AT3G56680.1); similar to hypothetical protein [Vitis vinifera] (GB:CAN73572.1); contains InterPro domain Single-stranded nucleic acid binding R3H; (InterPro:IPR001374)	0	0	#DIV/0!	0	1	0	0	1	0	0.914971	0.337504
AT2G41370	protein_coding	BOP2 (BLADE ON PETIOLE2); protein binding	Encodes a cytoplasmic and nuclear-localized NPR1 like protein with BTB/POZ domain and ankyrin repeats. Interacts with BOP1 and appears to be genetically redundant with BOP1.bop1/bop2 double mutants have longer leaves, often with leaflets on the petiole, a	similar to BOP1 (BLADE ON PETIOLE 1), protein binding [Arabidopsis thaliana] (TAIR:AT3G57130.1); similar to BTB/POZ [Medicago truncatula] (GB:ABD28327.1); similar to unnamed protein product [Vitis vinifera] (GB:CAO23333.1); similar to hypothetical protein	0	0	#DIV/0!	0	1	0	0	1	0	0.854273	0.168886
AT2G41680	protein_coding	thioredoxin reductase, putative / NADPH-dependent thioredoxin reductase, putative		similar to NTRA (NADPH-dependent thioredoxin reductase 2) [Arabidopsis thaliana] (TAIR:AT2G17420.1); similar to unnamed protein product [Vitis vinifera] (GB:CAO23607.1); similar to NADP-thioredoxin reductase C [Medicago truncatula] (GB:ABH10139.1); simila	0	0	#DIV/0!	0	1	0	0	1	0	1.51418	0.029074
AT2G41700	protein_coding	ATPase, coupled to transmembrane movement of substances / amino acid transmembrane transporter		similar to ATATH11 (ABC2 homolog 11), ATPase, coupled to transmembrane movement of substances [Arabidopsis thaliana] (TAIR:AT5G61730.1); similar to ABC transporter family protein [Tetrahymena thermophila SB210] (GB:XP_001027849.1); similar to hypothetical	0	0	#DIV/0!	0	1	0	0	1	0	1.0955	0.439979
AT2G41980	protein_coding	seven in absentia (SINA) family protein		Identical to Putative E3 ubiquitin-protein ligase SINAT1 (SINAT1) [Arabidopsis Thaliana] (GB:P93748); similar to seven in absentia (SINA) family protein [Arabidopsis thaliana] (TAIR:AT3G58040.1); similar to SINA2p [Vitis vinifera] (GB:CAB40578.1); contai	0	0	#DIV/0!	0	1	0	0	1	0	0.982941	0.919649
AT2G42010	protein_coding	PLDBETA1 (PHOSPHOLIPASE D BETA 1); phospholipase D	phospholipase D (PLDbeta)	Identical to Phospholipase D beta 1 (PLDBETA1) [Arabidopsis Thaliana] (GB:P93733;GB:P93745); similar to PLDBETA2 (phospholipase D beta 2) [Arabidopsis thaliana] (TAIR:AT4G00240.1); similar to PLDGAMMA3 (phospholipase D gamma 3), phospholipase D [Arabidop	0	0	#DIV/0!	0	1	0	0	1	0	0.927527	0.685278
AT2G42040	protein_coding			similar to unnamed protein product [Vitis vinifera] (GB:CAO23408.1); contains InterPro domain WRC (InterPro:IPR014977)	0	2	0	0	0	#DIV/0!	0	2	0	1.08653	0.775873
AT2G42060	protein_coding	CHP-rich zinc finger protein, putative		similar to DC1 domain-containing protein [Arabidopsis thaliana] (TAIR:AT2G27660.1); similar to DC1 domain containing protein [Nicotiana tabacum] (GB:BAF80453.1); contains InterPro domain Protein kinase C, phorbol ester/diacylglycerol binding; (InterPro:IP	0	0	#DIV/0!	0	1	0	0	1	0	1.31206	0.155032
AT2G42410	protein_coding	zinc finger (C2H2 type) family protein		similar to SUP (SUPERMAN), DNA binding / nucleic acid binding / transcription factor/ zinc ion binding [Arabidopsis thaliana] (TAIR:AT3G23130.1); similar to unnamed protein product [Vitis vinifera] (GB:CAO71330.1); contains InterPro domain Zinc finger, C2	0	0	#DIV/0!	0	1	0	0	1	0	0.942198	0.568804
AT2G42490	protein_coding	copper amine oxidase, putative		similar to copper amine oxidase, putative [Arabidopsis thaliana] (TAIR:AT3G43670.1); similar to unnamed protein product [Vitis vinifera] (GB:CAO16112.1); similar to peroxisomal copper-containing amine oxidase [Glycine max] (GB:AAD40979.1); similar to hypo	0	0	#DIV/0!	0	2	0	0	2	0	0.933877	0.640553
AT1G14200	protein_coding	zinc finger (C3HC4-type RING finger) family protein		similar to zinc finger (C3HC4-type RING finger) family protein [Arabidopsis thaliana] (TAIR:AT1G26800.1); similar to unknown [Populus trichocarpa] (GB:ABK93617.1); contains InterPro domain Zinc finger, RING/FYVE/PHD-type (InterPro:IPR013083); contains Int	0	0	#DIV/0!	1	0	#DIV/0!	1	30	0.0333333	1.48011	0.280209
AT2G42530	protein_coding	COR15B		similar to COR15A (COLD-REGULATED 15A) [Arabidopsis thaliana] (TAIR:AT2G42540.2); similar to cold response protein [Thellungiella salsuginea] (GB:ABX79675.1); contains domain PTHR23241 (PTHR23241)	0	20	0	0	4	0	0	24	0	0.217136	0.160102
AT2G42680	protein_coding	ATMBF1A/MBF1A (MULTIPROTEIN BRIDGING FACTOR 1A); DNA binding / transcription coactivator	One of three genes in A. thaliana encoding multiprotein bridging factor 1, a highly conserved transcriptional coactivator. May serve as a bridging factor between a bZIP factor and TBP. Its expression is developmentally regulated.	similar to ATMBF1B/MBF1B (MULTIPROTEIN BRIDGING FACTOR 1B), DNA binding / transcription coactivator [Arabidopsis thaliana] (TAIR:AT3G58680.1); similar to hypothetical protein [Vitis vinifera] (GB:CAN83249.1); contains InterPro domain Multiprotein bridging	0	1	0	0	0	#DIV/0!	0	1	0	1.09205	0.525264
AT2G42770	protein_coding	peroxisomal membrane 22 kDa family protein		similar to peroxisomal membrane 22 kDa family protein [Arabidopsis thaliana] (TAIR:AT5G43140.1); similar to unnamed protein product [Vitis vinifera] (GB:CAO69923.1); contains InterPro domain Mpv17/PMP22; (InterPro:IPR007248)	0	0	#DIV/0!	0	1	0	0	1	0	1.11945	0.459411
AT2G43050	protein_coding	ATPMEPCRD; pectinesterase		similar to pectinesterase family protein [Arabidopsis thaliana] (TAIR:AT3G59010.1); similar to unnamed protein product [Vitis vinifera] (GB:CAO45285.1); contains InterPro domain Pectin lyase fold (InterPro:IPR012334); contains InterPro domain Pectinestera	0	1	0	0	0	#DIV/0!	0	1	0	1.01634	0.900018
AT2G43130	protein_coding	ARA4 (Arabidopsis Rab GTPase homolog A5c); GTP binding	encodes a protein belonging to the Rab/Ypt family of small GTPases, which are implicated in intracellular vesicular traffic.	Identical to Ras-related protein ARA-4 (ARA-4) [Arabidopsis Thaliana] (GB:P28187); similar to ARA/Ara-1/AtRABA5e/AtRab11D (Arabidopsis Rab GTPase homolog A5e), GTP binding [Arabidopsis thaliana] (TAIR:AT1G05810.1); similar to AtRABA5d (Arabidopsis Rab GTP	0	0	#DIV/0!	0	1	0	0	1	0	0.645454	0.127367
AT2G43140	protein_coding	DNA binding / transcription factor		similar to basic helix-loop-helix (bHLH) family protein [Arabidopsis thaliana] (TAIR:AT1G05805.1); similar to unnamed protein product [Vitis vinifera] (GB:CAO67768.1); contains InterPro domain Basic helix-loop-helix dimerisation region bHLH; (InterPro:IPR	0	0	#DIV/0!	0	1	0	0	1	0	1.21963	0.213622
AT2G43220	protein_coding	DC1 domain-containing protein		similar to DC1 domain-containing protein [Arabidopsis thaliana] (TAIR:AT4G01910.1); similar to DC1 domain-containing protein [Brassica oleracea] (GB:ABD65623.1); contains InterPro domain Protein kinase C, phorbol ester/diacylglycerol binding; (InterPro:IP	0	1	0	0	0	#DIV/0!	0	1	0	1.08111	0.274928
AT2G43270	protein_coding	F-box family protein		Identical to F-box/Kelch-repeat protein At2g43270 [Arabidopsis Thaliana] (GB:Q1PEU9;GB:O22843); similar to F-box family protein / S locus-related [Arabidopsis thaliana] (TAIR:AT2G43260.1); similar to F-box domain containing protein [Brassica oleracea] (GB	0	0	#DIV/0!	0	2	0	0	2	0	1.52215	0.234777
AT2G43350	protein_coding	ATGPX3 (GLUTATHIONE PEROXIDASE 3); glutathione peroxidase	Glutathione peroxidase. Functions as both a redox transducer and a scavenger in abscisic acid and drought stress responses. Interacts with ABI2 and ABI1.	Identical to Probable glutathione peroxidase 3, mitochondrial precursor (GPX3) [Arabidopsis Thaliana] (GB:O22850); similar to ATGPX1 (GLUTATHIONE PEROXIDASE 1), glutathione peroxidase [Arabidopsis thaliana] (TAIR:AT2G25080.1); similar to phospholipid hyd	0	1	0	0	0	#DIV/0!	0	1	0	0.9496	0.646996
AT2G43550	protein_coding	trypsin inhibitor, putative	Encodes a defensin-like (DEFL) family protein.	Identical to Putative trypsin inhibitor At2g43550 precursor [Arabidopsis Thaliana] (GB:O22869); similar to trypsin inhibitor, putative [Arabidopsis thaliana] (TAIR:AT2G43535.1); similar to putative trypsin inhibitor I6 [Arabidopsis lyrata subsp. petraea]	0	1	0	0	2	0	0	3	0	1.04011	0.850709
AT2G43710	protein_coding	SSI2 (fatty acid biosynthesis 2); acyl-[acyl-carrier-protein] desaturase	Encodes a stearoyl-ACP desaturase, involved in fatty acid desaturation. The ssi2 mutants have increased 18:0 and reduced 18:1 fatty acids. Exogenous application of glycerol to wild type plants mimics the ssi2 mutant phenotype. The altered 18:1 fatty acid	similar to acyl-(acyl-carrier-protein) desaturase, putative / stearoyl-ACP desaturase, putative [Arabidopsis thaliana] (TAIR:AT3G02630.1); similar to stearoyl-ACP-desaturase [Brassica napus] (GB:AAT65205.1); similar to Stearoyl-acyl carrier protein desatu	0	0	#DIV/0!	0	1	0	0	1	0	1.31639	0.0277315
AT2G43750	protein_coding	OASB (O-ACETYLSERINE (THIOL) LYASE B); cysteine synthase	Arabidopsis thaliana O-acetylserine (thiol) lyase (OAS-TL) isoform oasB, the key enzyme for fixation of inorganic sulfide. It catalyzes the formation of cysteine from O-acetylserine and inorganic sulfide.	Identical to Cysteine synthase, chloroplast/chromoplast precursor (OASB) [Arabidopsis Thaliana] (GB:P47999;GB:O22828;GB:Q42568); similar to OASC (O-ACETYLSERINE (THIOL) LYASE ISOFORM C), cysteine synthase [Arabidopsis thaliana] (TAIR:AT3G59760.3); simila	0	1	0	0	1	0	0	2	0	0.642219	0.0477848
AT2G43950	protein_coding	OEP37; ion channel	Constitutes a peptide sensitive ion channel in chloroplast outer membranes. Accumulates in germinating seeds and developing embryos.	similar to unknown [Populus trichocarpa] (GB:ABK94738.1)	0	0	#DIV/0!	0	1	0	0	1	0	1.23246	0.242156
AT2G43980	protein_coding	ATITPK4 (INOSITOL 1,3,4-TRISPHOSPHATE 5/6-KINASE 4); catalytic		Identical to Inositol-tetrakisphosphate 1-kinase 4 (ITPK4) [Arabidopsis Thaliana] (GB:O80568;GB:Q8VYL6); similar to inositol 1,3,4-trisphosphate 5/6-kinase family protein [Arabidopsis thaliana] (TAIR:AT4G08170.1); similar to inositol 1,3,4-trisphosphate	0	1	0	0	0	#DIV/0!	0	1	0	0.868624	0.282363
AT2G44090	protein_coding			similar to unknown protein [Arabidopsis thaliana] (TAIR:AT3G59910.1); similar to hypothetical protein [Vitis vinifera] (GB:CAN70678.1); similar to unnamed protein product [Vitis vinifera] (GB:CAO46384.1); similar to hypothetical protein [Nicotiana tabacum	0	1	0	0	0	#DIV/0!	0	1	0	0.821816	0.283678
AT2G44770	protein_coding	phagocytosis and cell motility protein ELMO1-related		similar to phagocytosis and cell motility protein ELMO1-related [Arabidopsis thaliana] (TAIR:AT3G60260.4); similar to phagocytosis and cell motility protein ELMO1-related [Arabidopsis thaliana] (TAIR:AT3G60260.2); similar to phagocytosis and cell motility	0	0	#DIV/0!	0	1	0	0	1	0	0.903155	0.550592
AT2G44870	protein_coding			similar to unnamed protein product [Vitis vinifera] (GB:CAO62235.1); contains domain Zinc beta-ribbon (SSF57783)	0	0	#DIV/0!	0	3	0	0	3	0	1.15654	0.236701
AT2G45280	protein_coding	ATRAD51C (Arabidopsis thaliana Ras Associated with Diabetes protein 51C); ATP binding / damaged DNA binding	Encodes a protein similar to RAD51C involved in double stranded break repair via homologous recombination. Sensitive to DSB induced by Mitomycin C and gamma irradiation, interacts with Atxrcc3 in yeast two-hybrid assay. Required for female meiosis but no	Identical to DNA repair protein RAD51 homolog 3 (RAD51C) [Arabidopsis Thaliana] (GB:Q8GXF0;GB:O22144;GB:Q8RY30;GB:Q93X07;GB:Q9FT75;GB:Q9FT80); similar to ATDMC1 (RECA-LIKE GENE), ATP binding / DNA-dependent ATPase/ damaged DNA binding [Arabidopsis thalia	0	0	#DIV/0!	0	1	0	0	1	0	1.16578	0.543112
AT2G45530	protein_coding	zinc finger (C3HC4-type RING finger) family protein		similar to zinc finger (C3HC4-type RING finger) family protein [Arabidopsis thaliana] (TAIR:AT2G37950.1); similar to unknown [Populus trichocarpa] (GB:ABK93910.1); contains InterPro domain Zinc finger, RING/FYVE/PHD-type (InterPro:IPR013083); contains Int	0	0	#DIV/0!	0	1	0	0	1	0	1.00683	0.96976
AT1G79040	protein_coding	PSBR (photosystem II subunit R)	Encodes for the 10 kDa PsbR subunit of photosystem II (PSII). This subunit appears to be involved in the stable assembly of PSII, particularly that of the oxygen-evolving complex subunit PsbP. Mutants defective in this gene have reduced amounts of subunit	Identical to Photosystem II 10 kDa polypeptide, chloroplast precursor (PSBR) [Arabidopsis Thaliana] (GB:P27202); similar to Photosystem II 10 kDa polypeptide, chloroplast precursor (GB:P49108); contains InterPro domain Photosystem II protein PsbR; (InterP	22	14	1.57143	22	14	1.57143	44	45	0.977778	1.09039	0.286236
AT2G45640	protein_coding	SAP18 (SIN3 ASSOCIATED POLYPEPTIDE P18); protein binding / transcription regulator	Involved in the regulation of salt stress. Expression of AtSAP18 is induced by NaCl, cold, drought, ABA, and ethylene treatment. AtSAP18 and HDA19 associate with ERF3 and ERF4 both in vitro and in vivo.	Identical to Histone deacetylase complex subunit SAP18 [Arabidopsis Thaliana] (GB:O64644;GB:Q0WTU2;GB:Q8L8K8); similar to P18 [Solanum chacoense] (GB:AAQ24533.1); contains InterPro domain Sin3 associated polypeptide p18 (InterPro:IPR010516); contains Int	0	0	#DIV/0!	0	1	0	0	1	0	1.01296	0.901517
AT2G45695	protein_coding			similar to unknown protein [Arabidopsis thaliana] (TAIR:AT3G61113.1); similar to hypothetical protein [Vitis vinifera] (GB:CAN82245.1); similar to unnamed protein product [Vitis vinifera] (GB:CAO24464.1); contains InterPro domain Ubiquitin-related modifie	0	0	#DIV/0!	0	1	0	0	1	0
AT2G45740	protein_coding	PEX11D	member of the peroxin11 (PEX11) gene family, integral to peroxisome membrane, controls peroxisome proliferation.	similar to PEX11E [Arabidopsis thaliana] (TAIR:AT3G61070.2); similar to PEX11E [Arabidopsis thaliana] (TAIR:AT3G61070.1); similar to unknown [Populus trichocarpa x Populus deltoides] (GB:ABK96573.1); contains InterPro domain Peroxisomal biogenesis factor	0	1	0	0	0	#DIV/0!	0	1	0	1.25416	0.203784
AT2G45980	protein_coding			similar to unknown protein [Arabidopsis thaliana] (TAIR:AT4G00355.2); similar to unknown protein [Arabidopsis thaliana] (TAIR:AT4G00355.3); similar to unknown protein [Arabidopsis thaliana] (TAIR:AT4G00355.1); similar to unknown [Populus trichocarpa] (GB:	0	0	#DIV/0!	0	1	0	0	1	0	0.971088	0.870959
AT2G45990	protein_coding			similar to unnamed protein product [Vitis vinifera] (GB:CAO39632.1); contains domain HAD-like (SSF56784)	0	0	#DIV/0!	0	1	0	0	1	0	0.98127	0.624217
AT2G46470	protein_coding	OXA1L (INNER MEMBRANE PROTEIN OXA1-LIKE)		Identical to Inner membrane protein OXA1-like, mitochondrial precursor (OXA1L) [Arabidopsis Thaliana] (GB:Q9SKD3); similar to OXA1 (Oxidase assembly 1), P-P-bond-hydrolysis-driven protein transmembrane transporter [Arabidopsis thaliana] (TAIR:AT5G62050.1)	0	0	#DIV/0!	0	1	0	0	1	0	1.24077	0.152529
AT2G46490	protein_coding			similar to unknown protein [Arabidopsis thaliana] (TAIR:AT5G35110.1); similar to hypothetical protein [Vitis vinifera] (GB:CAN80242.1)	0	0	#DIV/0!	0	1	0	0	1	0	0.694362	0.024258
AT2G46550	protein_coding			similar to unknown protein [Arabidopsis thaliana] (TAIR:AT1G01240.3); similar to unknown protein [Arabidopsis thaliana] (TAIR:AT1G01240.1); similar to unknown protein [Arabidopsis thaliana] (TAIR:AT1G01240.2); similar to unnamed protein product [Vitis vin	0	0	#DIV/0!	0	1	0	0	1	0	1.12822	0.581043
AT2G46580	protein_coding	pyridoxine 5'-phosphate oxidase-related		similar to unnamed protein product [Vitis vinifera] (GB:CAO14403.1); contains InterPro domain Pyridoxamine 5&apos; (InterPro:IPR000659); contains InterPro domain FMN-binding split barrel, related (InterPro:IPR009002); contains InterPro domain FMN-binding	0	1	0	0	0	#DIV/0!	0	1	0	0.849516	0.0612185
AT2G46810	protein_coding	basic helix-loop-helix (bHLH) family protein		similar to basic helix-loop-helix (bHLH) family protein [Arabidopsis thaliana] (TAIR:AT3G61950.1); similar to hypothetical protein [Vitis vinifera] (GB:CAN75452.1); contains InterPro domain Basic helix-loop-helix dimerisation region bHLH; (InterPro:IPR001	0	0	#DIV/0!	0	1	0	0	1	0
AT2G46920	protein_coding	POL (POLTERGEIST); protein serine/threonine phosphatase	Pol mutations are recessive, partial suppressors of meristem defects in strong clv1 and clv3 mutants, and nearly complete suppressors of weak clv1 mutants. Single mutants appear normal. Acts downstream of the CLV signaling pathway in meristem development	Identical to Protein phosphatase 2C POLTERGEIST (POL) [Arabidopsis Thaliana] (GB:Q8RWN7;GB:O80732); similar to PLL1 (POLTERGEIST LIKE 1), protein serine/threonine phosphatase [Arabidopsis thaliana] (TAIR:AT2G35350.1); similar to unnamed protein product [	0	0	#DIV/0!	0	1	0	0	1	0	1.56564	0.00198849
AT2G47040	protein_coding	VGD1 (VANGUARD1); pectinesterase	Share high homologies with a group of pectin methylesterases (PME), pollen specific, and is required for enhancing the growth of pollen tube in style and transmitting tract tissues.	Identical to Pectinesterase-5 precursor (PME5) [Arabidopsis Thaliana] (GB:Q5MFV8;GB:O80721;GB:Q9SMV9); similar to VGDH2 (VANGUARD 1 HOMOLOG 2), pectinesterase [Arabidopsis thaliana] (TAIR:AT3G62170.1); similar to VGDH1, pectinesterase [Arabidopsis thalia	0	1	0	0	0	#DIV/0!	0	1	0	0.499388	0.454341
AT2G47240	protein_coding	long-chain-fatty-acid--CoA ligase family protein / long-chain acyl-CoA synthetase family protein		similar to long-chain-fatty-acid--CoA ligase, putative / long-chain acyl-CoA synthetase, putative [Arabidopsis thaliana] (TAIR:AT4G11030.1); similar to long-chain-fatty-acid--CoA ligase / long-chain acyl-CoA synthetase [Arabidopsis thaliana] (TAIR:AT4G238	0	0	#DIV/0!	0	1	0	0	1	0	0.902165	0.366101
AT2G47380	protein_coding	cytochrome c oxidase subunit Vc family protein / COX5C family protein		Identical to Probable cytochrome c oxidase polypeptide Vc-1 [Arabidopsis Thaliana] (GB:O22912); similar to cytochrome c oxidase subunit Vc, putative / COX5C, putative [Arabidopsis thaliana] (TAIR:AT5G61310.2); similar to cytochrome c oxidase subunit Vc,	0	1	0	0	1	0	0	2	0	0.699044	0.0196315
AT2G47390	protein_coding	serine-type endopeptidase/ serine-type peptidase		similar to hypothetical protein OsI_010936 [Oryza sativa (indica cultivar-group)] (GB:EAY89703.1); similar to unnamed protein product [Vitis vinifera] (GB:CAO40114.1); similar to hypothetical protein OsJ_010143 [Oryza sativa (japonica cultivar-group)] (GB	0	1	0	0	2	0	0	3	0	0.916695	0.677639
AT2G47410	protein_coding	nucleotide binding		similar to transducin family protein / WD-40 repeat family protein [Arabidopsis thaliana] (TAIR:AT5G49430.1); similar to unnamed protein product [Vitis vinifera] (GB:CAO40110.1); similar to Cytochrome cd1-nitrite reductase-like, C-terminal haem d1 [Medica	0	0	#DIV/0!	0	1	0	0	1	0	0.992662	0.910771
AT2G47600	protein_coding	ATMHX (MAGNESIUM/PROTON EXCHANGER); cation:cation antiporter	Encodes a magnesium/proton exchanger, member of putative Na+/Ca2+ antiporter gene family	similar to hypothetical protein OsI_008111 [Oryza sativa (indica cultivar-group)] (GB:EAY86878.1); similar to hypothetical protein OsI_008118 [Oryza sativa (indica cultivar-group)] (GB:EAY86885.1); similar to unnamed protein product [Vitis vinifera] (GB:C	0	1	0	0	0	#DIV/0!	0	1	0	0.821672	0.4401
AT2G47850	protein_coding	zinc finger (CCCH-type) family protein		Identical to Zinc finger CCCH domain-containing protein ZFN-like 1 [Arabidopsis Thaliana] (GB:Q84W91;GB:O82252); similar to nucleic acid binding [Arabidopsis thaliana] (TAIR:AT3G06410.1); similar to unnamed protein product [Vitis vinifera] (GB:CAO22402.1)	0	0	#DIV/0!	0	1	0	0	1	0	0.900657	0.735892
AT2G47900	protein_coding	AtTLP3 (TUBBY LIKE PROTEIN 3); phosphoric diester hydrolase/ transcription factor	Member of TLP family	Identical to Tubby-like F-box protein 3 (TULP3) [Arabidopsis Thaliana] (GB:Q8VY21;GB:O82257); similar to AtTLP10 (TUBBY LIKE PROTEIN 10), phosphoric diester hydrolase/ transcription factor [Arabidopsis thaliana] (TAIR:AT1G25280.1); similar to unnamed pro	0	0	#DIV/0!	0	1	0	0	1	0	0.994813	0.981207
AT2G47910	protein_coding	CRR6 (CHLORORESPIRATORY REDUCTION 6)		similar to hypothetical protein [Vitis vinifera] (GB:CAN77780.1); contains InterPro domain Protein of unknown function DUF1817 (InterPro:IPR014946)	0	0	#DIV/0!	0	2	0	0	2	0	1.12919	0.0731106
AT2G48120	protein_coding	PAC (PALE CRESS)	The pale cress (pac) mutant affects chloroplast and leaf development; mutants are ABA-deficient and accumulate lower levels of carotenoids and chlorophyll compared to wild type. PAC is probably involved in chloroplast mRNA maturation. Three alternative tr	similar to unnamed protein product [Vitis vinifera] (GB:CAO22493.1)	0	0	#DIV/0!	0	1	0	0	1	0	0.781829	0.0936821
AT3G01060	protein_coding			similar to unnamed protein product [Vitis vinifera] (GB:CAO15045.1); similar to unknown [Brassica rapa] (GB:ABC41272.1)	0	0	#DIV/0!	0	1	0	0	1	0	1.25979	0.287093
AT3G01100	protein_coding	HYP1 (HYPOTHETICAL PROTEIN 1)	unknown protein, has cDNAs and ESTs associated to it	similar to unknown protein [Arabidopsis thaliana] (TAIR:AT1G69450.1); similar to unnamed protein product [Vitis vinifera] (GB:CAO64743.1); similar to unnamed protein product [Vitis vinifera] (GB:CAO15025.1); similar to Protein of unknown function DUF221 [	0	0	#DIV/0!	0	1	0	0	1	0	1.22379	0.162614
AT3G01120	protein_coding	MTO1 (METHIONINE OVERACCUMULATION 1)	encodes a cystathionine gamma-synthase, which performs the first committed step in methionine biosynthesis. A conserved motif of 13 amino acids in the first exon is required for posttranscriptional autoregulation. This enzyme shares the same substrate as	Identical to Cystathionine gamma-synthase, chloroplast precursor (CGS1) [Arabidopsis Thaliana] (GB:P55217;GB:P92944;GB:P93038;GB:Q42550); similar to cystathionine gamma-synthase, chloroplast, putative / O-succinylhomoserine (Thiol)-lyase, putative [Arabi	0	1	0	0	0	#DIV/0!	0	1	0	1.24548	0.297363
AT3G01280	protein_coding	porin, putative		Identical to Outer mitochondrial membrane protein porin 1 [Arabidopsis Thaliana] (GB:Q9SRH5); similar to porin, putative / voltage-dependent anion-selective channel protein, putative [Arabidopsis thaliana] (TAIR:AT5G15090.1); similar to outer mitochondri	0	0	#DIV/0!	0	1	0	0	1	0	0.818379	0.0754295
AT3G01590	protein_coding	aldose 1-epimerase family protein		similar to aldose 1-epimerase family protein [Arabidopsis thaliana] (TAIR:AT5G14500.1); similar to unnamed protein product [Vitis vinifera] (GB:CAO14692.1); contains InterPro domain Aldose 1-epimerase; (InterPro:IPR008183); contains InterPro domain Glycos	0	0	#DIV/0!	0	1	0	0	1	0	0.894908	0.321937
AT3G01780	protein_coding	TPLATE; binding	Encodes TPLATE, a cytokinesis protein targeted to the cell plate. Functions in vesicle-trafficking events required for site-specific cell wall modifications during pollen germination and for anchoring of the cell plate to the mother wall at the correct c	similar to expressed protein [Oryza sativa (japonica cultivar-group)] (GB:AAX95799.1); similar to hypothetical protein OsI_034102 [Oryza sativa (indica cultivar-group)] (GB:EAY80143.1); similar to unnamed protein product [Vitis vinifera] (GB:CAO14600.1);	0	1	0	0	0	#DIV/0!	0	1	0	0.95781	0.782496
AT3G01920	protein_coding	yrdC family protein		similar to yrdC protein-related [Arabidopsis thaliana] (TAIR:AT5G60590.2); similar to unknown [Populus trichocarpa x Populus deltoides] (GB:ABK96713.1); contains InterPro domain Sua5/YciO/YrdC/YwlC (InterPro:IPR004388); contains InterPro domain SUA5/yciO/	0	0	#DIV/0!	0	2	0	0	2	0	1.05429	0.696148
AT3G02140	protein_coding	TMAC2 (TWO OR MORE ABRES-CONTAINING GENE 2)	Encodes a protein that acts in the nucleus and is an important negative regulator of ABA and salt stress responses, and could play a critical role in controlling root elongation, floral initiation and starch degradation.	similar to unknown protein [Arabidopsis thaliana] (TAIR:AT3G29575.4); similar to unknown protein [Arabidopsis thaliana] (TAIR:AT3G29575.1); similar to unknown protein [Arabidopsis thaliana] (TAIR:AT3G29575.3); similar to unnamed protein product [Vitis vin	0	0	#DIV/0!	0	1	0	0	1	0	0.487757	0.070618
AT1G75750	protein_coding	GASA1 (GAST1 PROTEIN HOMOLOG 1)	GA-responsive GAST1 protein homolog regulated by BR and GA antagonistically. Possibly involved in cell elongation based on expression data	Identical to Gibberellin-regulated protein 1 precursor (GASA1) [Arabidopsis Thaliana] (GB:P46689;GB:Q8W114;GB:Q9LR14); similar to unknown protein [Arabidopsis thaliana] (TAIR:AT2G18420.1); similar to snakin2 [Solanum tuberosum] (GB:CAC44012.1); contains I	29	17	1.70588	17	15	1.13333	46	32	1.4375	0.943923	0.301899
AT3G02600	protein_coding	ATLPP3/LPP3 (LIPID PHOSPHATE PHOSPHATASE 3); phosphatidate phosphatase	Encodes phosphatidic acid phosphatase. Expressed during germination.	Identical to Putative lipid phosphate phosphatase 3, chloroplast precursor (LPP3) [Arabidopsis Thaliana] (GB:Q8LFD1;GB:Q9M882); similar to ATPAP1 (PHOSPHATIDIC ACID PHOSPHATASE 1), phosphatidate phosphatase [Arabidopsis thaliana] (TAIR:AT2G01180.1); simi	0	0	#DIV/0!	0	1	0	0	1	0	1.06636	0.65897
AT3G02700	protein_coding	NC domain-containing protein		similar to NC domain-containing protein [Arabidopsis thaliana] (TAIR:AT5G16330.1); similar to unknown [Populus trichocarpa] (GB:ABK92854.1); contains InterPro domain NC (InterPro:IPR007053)	0	0	#DIV/0!	0	1	0	0	1	0	1.17365	0.360447
AT3G02830	protein_coding	ZFN1 (ZINC FINGER PROTEIN 1); nucleic acid binding	Encodes a zinc finger protein.	Identical to Zinc finger CCCH domain-containing protein ZFN1 (ZFN1) [Arabidopsis Thaliana] (GB:Q8GXX7;GB:Q9M8S4;GB:Q9XFB8); similar to ZFN3 (ZINC FINGER PROTEIN 3), nucleic acid binding [Arabidopsis thaliana] (TAIR:AT5G16540.1); similar to Zinc finger CCC	0	0	#DIV/0!	0	1	0	0	1	0	0.834107	0.310758
AT3G02930	protein_coding			similar to unknown protein [Arabidopsis thaliana] (TAIR:AT5G16730.1); similar to unnamed protein product [Vitis vinifera] (GB:CAO62148.1); contains domain PTHR23160 (PTHR23160)	0	1	0	0	0	#DIV/0!	0	1	0	0.664609	0.0018162
AT3G03060	protein_coding	ATPase		similar to AAA-type ATPase family protein [Arabidopsis thaliana] (TAIR:AT4G36580.1); similar to AAA-type ATPase family protein [Arabidopsis thaliana] (TAIR:AT5G16930.1); similar to AAA-type ATPase family protein [Arabidopsis thaliana] (TAIR:AT2G18330.1);	0	0	#DIV/0!	0	1	0	0	1	0	1.00738	0.942635
AT3G03110	protein_coding	XPO1B (exportin 1B); protein transporter		similar to XPO1A (exportin 1A), protein transporter [Arabidopsis thaliana] (TAIR:AT5G17020.1); similar to predicted protein [Physcomitrella patens subsp. patens] (GB:EDQ73248.1); similar to hypothetical protein OsJ_010402 [Oryza sativa (japonica cultivar-	0	1	0	0	0	#DIV/0!	0	1	0	1.17552	0.348185
AT3G03250	protein_coding	UGP (UDP-glucose pyrophosphorylase); UTP:glucose-1-phosphate uridylyltransferase	Is thought to encode a cytosolic UDP-glucose pyrophosphorylase with strong similarity to potato UTP--glucose-1-phosphate uridylyltransferase. Downregulated by flooding.	Identical to Probable UTP--glucose-1-phosphate uridylyltransferase 2 [Arabidopsis Thaliana] (GB:Q9M9P3;GB:Q9ASY1); similar to UTP--glucose-1-phosphate uridylyltransferase, putative / UDP-glucose pyrophosphorylase, putative / UGPase, putative [Arabidopsis	0	0	#DIV/0!	0	1	0	0	1	0	0.912548	0.373358
AT3G03305	protein_coding	calcineurin-like phosphoesterase family protein		similar to hypothetical protein OsI_004650 [Oryza sativa (indica cultivar-group)] (GB:EAY76803.1); similar to unnamed protein product [Vitis vinifera] (GB:CAO17816.1); similar to unnamed protein product [Vitis vinifera] (GB:CAO44992.1); contains InterPro	0	0	#DIV/0!	0	1	0	0	1	0	1.14794	0.599129
AT3G03330	protein_coding	short-chain dehydrogenase/reductase (SDR) family protein		similar to short-chain dehydrogenase/reductase (SDR) family protein [Arabidopsis thaliana] (TAIR:AT3G03350.1); similar to hypothetical protein [Vitis vinifera] (GB:CAN68791.1); contains InterPro domain Glucose/ribitol dehydrogenase; (InterPro:IPR002347);	0	0	#DIV/0!	0	1	0	0	1	0	0.99276	0.963082
AT3G03340	protein_coding	UNE6 (unfertilized embryo sac 6)		similar to LUC7 N_terminus domain-containing protein [Arabidopsis thaliana] (TAIR:AT5G17440.1); similar to unnamed protein product [Vitis vinifera] (GB:CAO22940.1); contains InterPro domain LUC7 related (InterPro:IPR004882)	0	1	0	0	0	#DIV/0!	0	1	0	0.848175	0.469548
AT3G03530	protein_coding	NPC4 (NONSPECIFIC PHOSPHOLIPASE C4); hydrolase, acting on ester bonds	PHOSPHOESTERASE FAMILY PROTEIN, NPC4 is significantly induced upon phosphate starvation and plays an important role in the supply of inorganic phosphate and diacylglycerol from membrane-phospholipids during phosphate deprivation.	similar to phosphoesterase family protein [Arabidopsis thaliana] (TAIR:AT3G03540.1); similar to phosphoesterase family protein [Arabidopsis thaliana] (TAIR:AT3G03520.1); similar to Os03g0852800 [Oryza sativa (japonica cultivar-group)] (GB:NP_001051927.1);	0	0	#DIV/0!	0	1	0	0	1	0
AT3G03690	protein_coding	UNE7 (unfertilized embryo sac 7); acetylglucosaminyltransferase/ transferase, transferring glycosyl groups		similar to glycosyltransferase family 14 protein / core-2/I-branching enzyme family protein [Arabidopsis thaliana] (TAIR:AT3G15350.1); similar to glycosyltransferase family 14 protein / core-2/I-branching enzyme family protein [Arabidopsis thaliana] (TAIR	0	0	#DIV/0!	0	2	0	0	2	0	1.1985	0.351203
AT3G03880	protein_coding			similar to unknown protein [Arabidopsis thaliana] (TAIR:AT1G55340.1); similar to unknown [Populus trichocarpa] (GB:ABK95741.1); contains InterPro domain Protein of unknown function DUF1639 (InterPro:IPR012438)	0	0	#DIV/0!	0	1	0	0	1	0	0.980606	0.917507
AT3G03980	protein_coding	short-chain dehydrogenase/reductase (SDR) family protein		similar to short-chain dehydrogenase/reductase (SDR) family protein [Arabidopsis thaliana] (TAIR:AT3G04000.1); similar to short chain dehydrogenase [Solanum tuberosum] (GB:BAE46415.1); contains InterPro domain Glucose/ribitol dehydrogenase; (InterPro:IPR0	0	1	0	0	0	#DIV/0!	0	1	0	1.04113	0.861576
AT3G04310	protein_coding			similar to unknown protein [Arabidopsis thaliana] (TAIR:AT2G33250.1); similar to unnamed protein product [Vitis vinifera] (GB:CAO38748.1)	0	0	#DIV/0!	0	1	0	0	1	0	1.42725	0.186946
AT3G04450	protein_coding	transcription factor		similar to myb family transcription factor [Arabidopsis thaliana] (TAIR:AT5G29000.2); similar to unnamed protein product [Vitis vinifera] (GB:CAO44634.1); contains InterPro domain Homeodomain-related; (InterPro:IPR012287); contains InterPro domain Homeodo	0	1	0	0	0	#DIV/0!	0	1	0	1.02778	0.718903
AT3G04480	protein_coding	endoribonuclease		similar to unnamed protein product [Vitis vinifera] (GB:CAO44678.1); similar to hypothetical protein OsJ_008513 [Oryza sativa (japonica cultivar-group)] (GB:EAZ25030.1); similar to endoribonuclease L-PSP family protein-like [Oryza sativa (japonica cultiva	0	1	0	0	0	#DIV/0!	0	1	0	0.905716	0.180303
AT3G04710	protein_coding	ankyrin repeat family protein		similar to stress-inducible protein, putative [Arabidopsis thaliana] (TAIR:AT4G12400.1); similar to stress-inducible protein, putative [Arabidopsis thaliana] (TAIR:AT4G12400.2); similar to hypothetical protein [Vitis vinifera] (GB:CAN69337.1); contains In	0	0	#DIV/0!	0	2	0	0	2	0	1.18387	0.157367
AT3G05070	protein_coding			similar to unnamed protein product [Vitis vinifera] (GB:CAO62046.1); contains InterPro domain mRNA splicing factor, Cwf18 (InterPro:IPR013169)	0	1	0	0	0	#DIV/0!	0	1	0	0.730221	0.148878
AT3G05230	protein_coding	signal peptidase subunit family protein		Identical to Signal peptidase complex subunit 3A [Arabidopsis Thaliana] (GB:Q9MA96;GB:O65203;GB:Q0WTA7); similar to signal peptidase subunit family protein [Arabidopsis thaliana] (TAIR:AT5G27430.1); similar to Signal peptidase 22 kDa subunit [Medicago tr	0	1	0	0	0	#DIV/0!	0	1	0	0.61578	0.00973199
AT3G05250	protein_coding	zinc finger (C3HC4-type RING finger) family protein		similar to zinc finger (C3HC4-type RING finger) family protein / BRCT domain-containing protein [Arabidopsis thaliana] (TAIR:AT1G67180.1); similar to unnamed protein product [Vitis vinifera] (GB:CAO17638.1); contains InterPro domain Zinc finger, RING/FYVE	0	0	#DIV/0!	0	1	0	0	1	0	1.41456	0.165753
AT3G05280	protein_coding	integral membrane Yip1 family protein		similar to integral membrane Yip1 family protein [Arabidopsis thaliana] (TAIR:AT5G27490.1); similar to unnamed protein product [Vitis vinifera] (GB:CAO17630.1); contains InterPro domain Yip1 domain (InterPro:IPR006977)	0	0	#DIV/0!	0	2	0	0	2	0	1.1928	0.24539
AT3G05320	protein_coding			similar to unnamed protein product [Vitis vinifera] (GB:CAO44440.1)	0	0	#DIV/0!	0	1	0	0	1	0	1.24233	0.571816
AT3G05470	protein_coding	formin homology 2 domain-containing protein / FH2 domain-containing protein		Identical to Formin-like protein 11 precursor (FH11) [Arabidopsis Thaliana] (GB:Q9MA60); similar to Fh5 (FORMIN HOMOLOGY5), actin binding [Arabidopsis thaliana] (TAIR:AT5G54650.2); similar to Fh5 (FORMIN HOMOLOGY5), actin binding [Arabidopsis thaliana] (	0	0	#DIV/0!	0	1	0	0	1	0	0.925328	0.502704
AT3G05545	protein_coding	transcription factor, putative / zinc finger (C3HC4 type RING finger) family protein		similar to zinc finger (C3HC4-type RING finger) family protein [Arabidopsis thaliana] (TAIR:AT2G47700.1); similar to hypothetical protein [Vitis vinifera] (GB:CAN80748.1); contains InterPro domain Zinc finger, RING/FYVE/PHD-type (InterPro:IPR013083); cont	0	0	#DIV/0!	0	1	0	0	1	0
AT3G05625	protein_coding	binding		similar to TPR repeat [Medicago truncatula] (GB:ABD28339.2); contains InterPro domain Tetratricopeptide-like helical; (InterPro:IPR011990); contains InterPro domain Tetratricopeptide TPR2 (InterPro:IPR013105); contains InterPro domain Tetratricopeptide re	0	0	#DIV/0!	0	1	0	0	1	0
AT3G05890	protein_coding	RCI2B (RARE-COLD-INDUCIBLE 2B)		Identical to Hydrophobic protein RCI2B (RCI2B) [Arabidopsis Thaliana] (GB:Q9ZNS6;GB:Q9M9K9); similar to RCI2A (RARE-COLD-INDUCIBLE 2A) [Arabidopsis thaliana] (TAIR:AT3G05880.1); similar to Protein of unknown function UPF0057; Bacterial extracellular solu	0	1	0	0	0	#DIV/0!	0	1	0	0.748141	0.0453858
AT3G06483	protein_coding	PDK (PYRUVATE DEHYDROGENASE KINASE); ATP binding / pyruvate dehydrogenase (acetyl-transferring) kinase	Pyruvate dehydrogenase kinase (PDK) specifically phosphorylates the E1&#945; subunit of the pyruvate dehydrogenase complex (PDC) on a Ser residue using ATP as a phosphate donor. PDK is a unique type of protein kinase having a His-kinase-like sequence but	similar to mitochondrial pyruvate dehydrogenase kinase isoform 2 [Glycine max] (GB:AAT02656.1); similar to mitochondrial pyruvate dehydrogenase kinase [Brassica napus] (GB:ABA25867.1); contains InterPro domain Histidine kinase; (InterPro:IPR005467); conta	0	1	0	0	1	0	0	2	0	0.96535	0.916718
AT3G06590	protein_coding	transcription factor		similar to transcription factor [Arabidopsis thaliana] (TAIR:AT3G17100.2); similar to transcription factor [Arabidopsis thaliana] (TAIR:AT3G17100.1); similar to unnamed protein product [Vitis vinifera] (GB:CAO44932.1); contains InterPro domain Basic helix	0	3	0	0	0	#DIV/0!	0	3	0	1.02469	0.911962
AT3G06670	protein_coding	binding		similar to binding [Arabidopsis thaliana] (TAIR:AT5G49390.1); similar to unknown protein [Oryza sativa (japonica cultivar-group)] (GB:BAD53932.1); similar to unnamed protein product [Vitis vinifera] (GB:CAO44893.1); similar to hypothetical protein [Vitis	0	0	#DIV/0!	0	1	0	0	1	0	0.874757	0.389567
AT3G06750	protein_coding	hydroxyproline-rich glycoprotein family protein			0	1	0	0	0	#DIV/0!	0	1	0	1.67119	0.236969
AT3G06760	protein_coding			Identical to Protein DEHYDRATION-INDUCED 19 homolog 4 (DI19-4) [Arabidopsis Thaliana] (GB:Q8VXU6;GB:Q9M7Y2); similar to HRB1 (HYPERSENSITIVE TO RED AND BLUE) [Arabidopsis thaliana] (TAIR:AT5G49230.1); similar to fiber protein Fb2 [Gossypium barbadense] (	0	0	#DIV/0!	0	3	0	0	4	0	1.10742	0.372874
AT3G07020	protein_coding	UDP-glucose:sterol glucosyltransferase (UGT80A2)		similar to UDP-glucose:sterol glucosyltransferase, putative [Arabidopsis thaliana] (TAIR:AT1G43620.2); similar to UDP-glucose:sterol glucosyltransferase, putative [Arabidopsis thaliana] (TAIR:AT1G43620.1); similar to UDP-glucose:sterol glucosyltransferase	0	1	0	0	0	#DIV/0!	0	1	0	1.05589	0.76798
AT3G07400	protein_coding	lipase class 3 family protein		similar to unnamed protein product [Vitis vinifera] (GB:CAO23671.1); similar to lipase class 3-like [Oryza sativa (japonica cultivar-group)] (GB:BAD22465.1); similar to hypothetical protein OsJ_006533 [Oryza sativa (japonica cultivar-group)] (GB:EAZ23050.	0	3	0	0	1	0	0	4	0	1.22889	0.0245072
AT3G07650	protein_coding	COL9 (CONSTANS-LIKE 9); transcription factor/ zinc ion binding	This gene belongs to the CO (CONSTANS) gene family. This gene family is divided in three subgroups: groups III, to which COL9 belongs, is characterised by one B-box (supposed to regulate protein-protein interactions) and a second diverged zinc finger. COL	Identical to Zinc finger protein CONSTANS-LIKE 9 (COL9) [Arabidopsis Thaliana] (GB:Q9SSE5;GB:Q94A77); similar to zinc finger (B-box type) family protein [Arabidopsis thaliana] (TAIR:AT5G48250.1); similar to unnamed protein product [Vitis vinifera] (GB:CAO	0	0	#DIV/0!	0	1	0	0	1	0	0.773646	0.715781
AT3G07700	protein_coding	ABC1 family protein		similar to ATATH13 (ABC2 homolog 13) [Arabidopsis thaliana] (TAIR:AT5G64940.2); similar to ATATH13 (ABC2 homolog 13) [Arabidopsis thaliana] (TAIR:AT5G64940.1); similar to unnamed protein product [Vitis vinifera] (GB:CAO41145.1); similar to hypothetical pr	0	0	#DIV/0!	0	2	0	0	2	0	0.920666	0.146106
AT3G07810	protein_coding	heterogeneous nuclear ribonucleoprotein, putative / hnRNP, putative		similar to heterogeneous nuclear ribonucleoprotein, putative / hnRNP, putative [Arabidopsis thaliana] (TAIR:AT5G47620.2); similar to heterogeneous nuclear ribonucleoprotein, putative / hnRNP, putative [Arabidopsis thaliana] (TAIR:AT5G47620.1); similar to	0	1	0	0	2	0	0	3	0	0.937524	0.728522
AT3G07820	protein_coding	polygalacturonase 3 (PGA3) / pectinase		similar to polygalacturonase, putative / pectinase, putative [Arabidopsis thaliana] (TAIR:AT3G07840.1); similar to polygalacturonase, putative / pectinase, putative [Arabidopsis thaliana] (TAIR:AT3G07830.1); similar to polygalacturonase, putative / pectin	0	1	0	0	0	#DIV/0!	0	1	0	0.270812	0.349386
AT3G07950	protein_coding	rhomboid protein-related		similar to unknown [Populus trichocarpa] (GB:ABK94692.1); contains InterPro domain Protein of unknown function DUF1751, integral membrane, eukaryotic (InterPro:IPR013861)	0	0	#DIV/0!	0	2	0	0	2	0	1.24017	0.294276
AT3G08010	protein_coding	ATAB2; RNA binding	Encodes a chloroplast-localized protein ATAB2. ATAB2 is involved in the biogenesis of Photosystem I and II. ATAB2 has A/U-rich RNA-binding activity and presumably functions as an activator of translation with targets at PS I and PS II.	similar to unnamed protein product [Vitis vinifera] (GB:CAO40818.1); contains InterPro domain Protein of unknown function DUF1092 (InterPro:IPR009472)	0	0	#DIV/0!	0	1	0	0	1	0	1.04962	0.493282
AT3G08580	protein_coding	AAC1 (ADP/ATP CARRIER 1); ATP:ADP antiporter/ binding	mitochondrial ADP/ATP carrier	Identical to ADP,ATP carrier protein 1, mitochondrial precursor (ANT1) [Arabidopsis Thaliana] (GB:P31167;GB:Q9M9K2); similar to AAC2 (ADP/ATP CARRIER 2), binding [Arabidopsis thaliana] (TAIR:AT5G13490.2); similar to AAC2 (ADP/ATP CARRIER 2), ATP:ADP anti	0	1	0	0	0	#DIV/0!	0	1	0	0.848693	0.120535
AT3G08590	protein_coding	2,3-biphosphoglycerate-independent phosphoglycerate mutase, putative / phosphoglyceromutase, putative		Identical to Probable 2,3-bisphosphoglycerate-independent phosphoglycerate mutase 2 [Arabidopsis Thaliana] (GB:Q9M9K1); similar to 2,3-biphosphoglycerate-independent phosphoglycerate mutase, putative / phosphoglyceromutase, putative [Arabidopsis thaliana	0	0	#DIV/0!	0	1	0	0	1	0	1.19553	0.146967
AT3G09100	protein_coding	mRNA capping enzyme family protein		similar to mRNA guanylyltransferase [Arabidopsis thaliana] (TAIR:AT5G01290.1); similar to hypothetical protein OsI_036485 [Oryza sativa (indica cultivar-group)] (GB:EAY82526.1); contains InterPro domain mRNA capping enzyme, bifunctional (InterPro:IPR01707	0	0	#DIV/0!	0	1	0	0	1	0	1.10658	0.698816
AT3G09600	protein_coding	myb family transcription factor		similar to LCL1 (LHY/CCA1-LIKE 1), DNA binding / transcription factor [Arabidopsis thaliana] (TAIR:AT5G02840.3); similar to MYB transcription factor [Catharanthus roseus] (GB:ABL63122.1); contains InterPro domain SANT, DNA-binding; (InterPro:IPR001005); c	0	0	#DIV/0!	0	1	0	0	1	0	1.36878	0.356259
AT3G09710	protein_coding	IQD1 (IQ-DOMAIN 1); calmodulin binding	Ca(2+)-dependent calmodulin-binding protein. Targeted to the nucleus. Involved in glucosinolate metabolism in response to biotic challenge. Expressed in vascular tissue.	Identical to Protein IQ-DOMAIN 1 (IQD1) [Arabidopsis Thaliana] (GB:Q9SF32); similar to IQD2 (IQ-domain 2), calmodulin binding [Arabidopsis thaliana] (TAIR:AT5G03040.1); similar to unnamed protein product [Vitis vinifera] (GB:CAO18115.1); contains InterPro	0	0	#DIV/0!	0	2	0	0	2	0	0.547248	0.0272711
AT3G09740	protein_coding	SYP71 (SYNTAXIN OF PLANTS 71)	syntaxin of plants 71 (SYP71)	Identical to Syntaxin-71 (SYP71) [Arabidopsis Thaliana] (GB:Q9SF29); similar to SYP72 (SYNTAXIN OF PLANTS 72) [Arabidopsis thaliana] (TAIR:AT3G45280.1); similar to unnamed protein product [Vitis vinifera] (GB:CAO18137.1); contains InterPro domain Target	0	0	#DIV/0!	0	1	0	0	1	0	0.999538	0.996581
AT3G09820	protein_coding	ADK1 (ADENOSINE KINASE 1)	Involved in the salvage synthesis of adenylates and methyl recycling	Identical to Adenosine kinase 1 (ADK1) [Arabidopsis Thaliana] (GB:Q9SF85); similar to ADK2 (ADENOSINE KINASE 2), kinase [Arabidopsis thaliana] (TAIR:AT5G03300.1); similar to adenosine kinase isoform 2S [Nicotiana tabacum] (GB:AAU14833.1); contains InterP	0	0	#DIV/0!	0	1	0	0	1	0	0.495001	0.00302631
AT3G09860	protein_coding			similar to unknown [Populus trichocarpa] (GB:ABK94762.1)	0	0	#DIV/0!	0	1	0	0	1	0	1.10813	0.61501
AT3G09880	protein_coding	ATB' BETA (Arabidopsis thaliana serine/threonine protein phosphatase 2A 55 kDa regulatory subunit B prime beta); protein phosphatase type 2A regulator	Encodes B' regulatory subunit of PP2A (AtB'beta).	Identical to Serine/threonine protein phosphatase 2A 57 kDa regulatory subunit B' beta isoform (B'BETA) [Arabidopsis Thaliana] (GB:O04376); similar to ATB' ALPHA (PP2A, B' subunit, alpha isoform), protein phosphatase type 2A regulator [Arabidopsis thalia	0	0	#DIV/0!	0	1	0	0	1	0	0.899826	0.318888
AT3G09920	protein_coding	PIP5K9 (PHOSPHATIDYL INOSITOL MONOPHOSPHATE 5 KINASE); 1-phosphatidylinositol-4-phosphate 5-kinase		Identical to Phosphatidylinositol-4-phosphate 5-kinase 9 (PIP5K9) [Arabidopsis Thaliana] (GB:Q8L850;GB:Q9SF93); similar to phosphatidylinositol-4-phosphate 5-kinase family protein [Arabidopsis thaliana] (TAIR:AT1G10900.1); similar to phosphatidylinositol	0	1	0	0	0	#DIV/0!	0	1	0	0.579597	0.0120768
AT3G10000	protein_coding	EDA31 (embryo sac development arrest 31); transcription factor		similar to PTL (PETAL LOSS), transcription factor [Arabidopsis thaliana] (TAIR:AT5G03680.1); similar to unnamed protein product [Vitis vinifera] (GB:CAO15958.1); similar to hypothetical protein [Vitis vinifera] (GB:CAN71904.1); contains InterPro domain SA	0	1	0	0	0	#DIV/0!	0	1	0
AT3G10050	protein_coding	OMR1 (L-O-METHYLTHREONINE RESISTANT 1); L-threonine ammonia-lyase	first enzyme in the biosynthetic pathway of isoleucine	Identical to Threonine dehydratase biosynthetic, chloroplast precursor (OMR1) [Arabidopsis Thaliana] (GB:Q9ZSS6;GB:Q9SPF1); similar to ATSR (ARABIDOPSIS THALIANA SIGNAL-RESPONSIVE), serine racemase [Arabidopsis thaliana] (TAIR:AT4G11640.1); similar to th	0	0	#DIV/0!	0	3	0	0	3	0	0.812317	0.205927
AT3G10120	protein_coding			similar to unknown protein [Arabidopsis thaliana] (TAIR:AT5G03890.1); similar to hypothetical protein [Vitis vinifera] (GB:CAN62766.1)	0	0	#DIV/0!	0	1	0	0	1	0	0.709669	0.0686785
AT3G10130	protein_coding	SOUL heme-binding family protein		Identical to Heme-binding-like protein At3g10130, chloroplast precursor [Arabidopsis Thaliana] (GB:Q9SR77;GB:Q8L605); similar to SOUL heme-binding family protein [Arabidopsis thaliana] (TAIR:AT5G20140.1); similar to unnamed protein product [Vitis vinifera	0	0	#DIV/0!	0	1	0	0	1	0
AT3G10260	protein_coding	reticulon family protein		similar to reticulon family protein (RTNLB6) [Arabidopsis thaliana] (TAIR:AT3G61560.1); similar to unnamed protein product [Vitis vinifera] (GB:CAO69968.1); contains InterPro domain Reticulon; (InterPro:IPR003388)	0	1	0	0	0	#DIV/0!	0	1	0	1.08946	0.396544
AT3G10270	protein_coding	DNA topoisomerase, ATP-hydrolyzing, putative / DNA topoisomerase II, putative / DNA gyrase, putative	Protein targeting to mitochondria is influenced by UTR sequences.	Identical to Probable DNA gyrase subunit B, chloroplast precursor (GYRBC) [Arabidopsis Thaliana] (GB:Q9SS38); similar to DNA topoisomerase, ATP-hydrolyzing, putative / DNA topoisomerase II, putative / DNA gyrase, putative [Arabidopsis thaliana] (TAIR:AT5	0	0	#DIV/0!	0	1	0	0	1	0	1.17094	0.646418
AT3G10350	protein_coding	anion-transporting ATPase family protein		similar to anion-transporting ATPase family protein [Arabidopsis thaliana] (TAIR:AT5G60730.1); similar to unknown [Populus trichocarpa] (GB:ABK95489.1); contains InterPro domain Anion-transporting ATPase; (InterPro:IPR003348)	0	2	0	0	0	#DIV/0!	0	2	0	0.557774	0.0363736
AT3G10370	protein_coding	glycerol-3-phosphate dehydrogenase, putative	mitochondrial FAD-dependent glycerol-3-phosphate dehydrogenase. possibly involved in storage lipid catabolism and glycerol assimilation, and in glycerol-3-phosphate shuttle which transports reducing power from cytosol to mitochondrion.	similar to unnamed protein product [Vitis vinifera] (GB:CAO68906.1); similar to predicted protein [Physcomitrella patens subsp. patens] (GB:EDQ80918.1); similar to hypothetical protein [Vitis vinifera] (GB:CAN81960.1); contains InterPro domain FAD-depende	0	0	#DIV/0!	0	1	0	0	1	0	0.626108	0.000590379
AT3G10405	protein_coding			similar to unnamed protein product [Vitis vinifera] (GB:CAO68898.1)	0	0	#DIV/0!	0	1	0	0	1	0
AT3G10410	protein_coding	SCPL49 (serine carboxypeptidase-like 49); serine carboxypeptidase		Identical to Serine carboxypeptidase-like 49 precursor (SCPL49) [Arabidopsis Thaliana] (GB:P32826;GB:Q42107;GB:Q9CAE5); similar to SCPL48 (serine carboxypeptidase-like 48), serine carboxypeptidase [Arabidopsis thaliana] (TAIR:AT3G45010.1); similar to SCP	0	0	#DIV/0!	0	1	0	0	1	0	1.15655	0.311515
AT3G10420	protein_coding	sporulation protein-related		similar to ATP binding / ATP-dependent peptidase/ nucleoside-triphosphatase/ nucleotide binding / serine-type endopeptidase [Arabidopsis thaliana] (TAIR:AT1G73170.1); similar to unnamed protein product [Vitis vinifera] (GB:CAO68881.1); contains InterPro d	0	0	#DIV/0!	0	1	0	0	1	0	1.60825	0.0254243
AT3G10572	protein_coding	3-phosphoinositide-dependent protein kinase-1, putative		similar to unnamed protein product [Vitis vinifera] (GB:CAO67112.1)	0	0	#DIV/0!	0	1	0	0	1	0
AT3G10650	protein_coding			similar to nucleoporin-related [Arabidopsis thaliana] (TAIR:AT5G20200.1); similar to unnamed protein product [Vitis vinifera] (GB:CAO66025.1)	0	0	#DIV/0!	0	1	0	0	1	0	1.07919	0.536448
AT3G10770	protein_coding	nucleic acid binding		similar to nucleic acid binding [Arabidopsis thaliana] (TAIR:AT5G05100.1); similar to hypothetical protein [Vitis vinifera] (GB:CAN73572.1); contains InterPro domain Single-stranded nucleic acid binding R3H; (InterPro:IPR001374)	0	1	0	0	1	0	0	2	0	1.05817	0.746314
AT3G10915	protein_coding	reticulon family protein		similar to reticulon family protein (RTNLB12) [Arabidopsis thaliana] (TAIR:AT3G54120.1); similar to unnamed protein product [Vitis vinifera] (GB:CAO41507.1); contains InterPro domain Reticulon; (InterPro:IPR003388)	0	0	#DIV/0!	0	1	0	0	1	0
AT3G10970	protein_coding	haloacid dehalogenase-like hydrolase family protein		similar to haloacid dehalogenase-like hydrolase family protein [Arabidopsis thaliana] (TAIR:AT4G11570.1); similar to haloacid dehalogenase-like hydrolase family protein [Arabidopsis thaliana] (TAIR:AT4G11570.2); similar to unnamed protein product [Vitis v	0	0	#DIV/0!	0	1	0	0	1	0	1.35769	0.060908
AT3G10985	protein_coding	SAG20 (WOUND-INDUCED PROTEIN 12)	A senescence-associated gene whose expression is induced in response to treatment with Nep1, a fungal protein that causes necrosis.	similar to unknown protein [Arabidopsis thaliana] (TAIR:AT5G01740.1); similar to elicitor inducible protein [Nicotiana tabacum] (GB:BAB13711.1); similar to wound-induced protein WI12 [Mesembryanthemum crystallinum] (GB:AAD23999.1); contains InterPro domai	0	2	0	0	0	#DIV/0!	0	2	0
AT3G11170	protein_coding	FAD7 (FATTY ACID DESATURASE 7); omega-3 fatty acid desaturase	Chloroplastic enzyme responsible for the synthesis of 16:3 and 18:3 fatty acids from galactolipids, sulpholipids and phosphatidylglycerol. Uses ferredoxin as electron donor. Gene expression is induced by wounding in shoot and root. The wound-response in s	Identical to Omega-3 fatty acid desaturase, chloroplast precursor (FAD7) [Arabidopsis Thaliana] (GB:P46310); similar to FAD8 (FATTY ACID DESATURASE 8), omega-3 fatty acid desaturase [Arabidopsis thaliana] (TAIR:AT5G05580.1); similar to chloroplast omega-	0	0	#DIV/0!	0	1	0	0	1	0	0.65489	0.19121
AT3G11240	protein_coding	arginine-tRNA-protein transferase, putative / arginyltransferase, putative / arginyl-tRNA-protein transferase, putative		similar to ATE1 (DELAYED LEAF SENESCENCE 1), arginyltransferase [Arabidopsis thaliana] (TAIR:AT5G05700.1); similar to unnamed protein product [Vitis vinifera] (GB:CAO41343.1); similar to Os05g0446800 [Oryza sativa (japonica cultivar-group)] (GB:NP_0010556	0	0	#DIV/0!	0	1	0	0	1	0	1.04591	0.793977
AT3G11385	protein_coding	DC1 domain-containing protein		similar to DC1 domain-containing protein [Arabidopsis thaliana] (TAIR:AT3G11370.1); similar to DC1 domain-containing protein [Arabidopsis thaliana] (TAIR:AT3G11402.1); similar to DC1 domain-containing protein [Arabidopsis thaliana] (TAIR:AT3G11390.1); sim	0	0	#DIV/0!	0	1	0	0	1	0
AT3G11450	protein_coding	DNAJ heat shock N-terminal domain-containing protein / cell division protein-related		similar to DNAJ heat shock N-terminal domain-containing protein / cell division protein-related [Arabidopsis thaliana] (TAIR:AT5G06110.1); similar to unnamed protein product [Vitis vinifera] (GB:CAO41896.1); contains InterPro domain Heat shock protein Dna	0	1	0	0	0	#DIV/0!	0	1	0	0.893133	0.37548
AT3G11540	protein_coding	SPY (SPINDLY); transferase, transferring glycosyl groups	Encodes a N-acetyl glucosamine transferase that may glycosylate other molecules involved in GA signaling. Contains a tetratricopeptide repeat region, and a novel carboxy-terminal region. SPY acts as both a repressor of GA responses and as a positive regu	Identical to Probable UDP-N-acetylglucosamine--peptide N- acetylglucosaminyltransferase SPINDLY (SPY) [Arabidopsis Thaliana] (GB:Q96301;GB:Q56YX8); similar to SEC (SECRET AGENT), transferase, transferring glycosyl groups [Arabidopsis thaliana] (TAIR:AT3G	0	1	0	0	0	#DIV/0!	0	1	0	1.1085	0.639512
AT3G11670	protein_coding	DGD1 (DIGALACTOSYL DIACYLGLYCEROL DEFICIENT 1); galactolipid galactosyltransferase/ transferase, transferring glycosyl groups	Responsible for the final assembly of galactolipids in photosynthetic membranes. Provides stability to the PS I core complex (e.g. subunits PsaD, PsaE).	Identical to Digalactosyldiacylglycerol synthase 1, chloroplast precursor (DGD1) [Arabidopsis Thaliana] (GB:Q9S7D1;GB:Q3EB81); similar to DGD2 (digalactosyldiacylglycerol synthase 2), digalactosyldiacylglycerol synthase / transferase, transferring glycos	0	0	#DIV/0!	0	1	0	0	1	0	1.24004	0.00266752
AT3G11730	protein_coding	ATFP8 (Arabidopsis Rab GTPase homolog D1); GTP binding	isoprenylated protein ATFP8	similar to AtRABD2b/AtRab1A (Arabidopsis Rab GTPase homolog D2b), GTP binding [Arabidopsis thaliana] (TAIR:AT5G47200.1); similar to ypt-related protein (GB:AAB04618.1); contains InterPro domain Ras GTPase; (InterPro:IPR001806); contains InterPro domain Ra	0	0	#DIV/0!	0	1	0	0	1	0	0.830981	0.0831784
AT3G11740	protein_coding			similar to unknown protein [Arabidopsis thaliana] (TAIR:AT5G01750.2); similar to unnamed protein product [Vitis vinifera] (GB:CAO48825.1); contains InterPro domain Protein of unknown function DUF567 (InterPro:IPR007612)	0	0	#DIV/0!	0	1	0	0	1	0	0.9549	0.445021
AT3G11760	protein_coding			similar to unknown protein [Arabidopsis thaliana] (TAIR:AT5G04860.1); similar to unnamed protein product [Vitis vinifera] (GB:CAO39924.1)	0	1	0	0	0	#DIV/0!	0	1	0	1.1589	0.410752
AT5G14740	protein_coding	CA2 (BETA CARBONIC ANHYDRASE 2); carbonate dehydratase/ zinc ion binding	Encodes a beta carbonic anhydrase likely to be localized in the cytoplasm. Expression of its mRNA is seen in etiolated seedlings and points to a possible nonphotosynthetic role for this isoform.	Identical to Carbonic anhydrase 2 (CA2) [Arabidopsis Thaliana] (GB:P42737;GB:Q42116;GB:Q9FDZ0;GB:Q9LER2); similar to CA1 (CARBONIC ANHYDRASE 1), carbonate dehydratase/ zinc ion binding [Arabidopsis thaliana] (TAIR:AT3G01500.2); similar to CA1 (CARBONIC A	5	6	0.833333	0	17	0	5	23	0.217391	0.926456	0.502038
AT3G11830	protein_coding	chaperonin, putative		similar to ATTCP-1 (Arabidopsis thaliana T-complex protein 1 alpha subunit), ATP binding / protein binding / unfolded protein binding [Arabidopsis thaliana] (TAIR:AT3G20050.1); similar to hypothetical protein [Vitis vinifera] (GB:CAN70107.1); similar to h	0	0	#DIV/0!	0	1	0	0	1	0	0.829728	0.116417
AT3G11960	protein_coding	cleavage and polyadenylation specificity factor (CPSF) A subunit C-terminal domain-containing protein		similar to DDB1A (UV-damaged DNA-binding protein 1A) [Arabidopsis thaliana] (TAIR:AT4G05420.2); similar to DDB1A (UV-damaged DNA-binding protein 1A), DNA binding [Arabidopsis thaliana] (TAIR:AT4G05420.1); similar to unnamed protein product [Vitis vinifera	0	0	#DIV/0!	0	1	0	0	1	0	1.17824	0.467275
AT3G12080	protein_coding	EMB2738 (EMBRYO DEFECTIVE 2738); GTP binding		similar to GTP-binding family protein [Arabidopsis thaliana] (TAIR:AT5G39960.1); similar to unnamed protein product [Vitis vinifera] (GB:CAO21919.1); similar to hypothetical protein OsI_035581 [Oryza sativa (indica cultivar-group)] (GB:EAY81622.1); contai	0	0	#DIV/0!	0	1	0	0	1	0	0.689378	0.116367
AT3G12170	protein_coding	DNAJ heat shock N-terminal domain-containing protein		similar to ATJ6 (ARABIDOPSIS J-DOMAIN PROTEIN 6), heat shock protein binding / unfolded protein binding [Arabidopsis thaliana] (TAIR:AT5G06910.1); similar to unnamed protein product [Vitis vinifera] (GB:CAO23538.1); contains InterPro domain Heat shock pro	0	1	0	0	0	#DIV/0!	0	1	0	1.313	0.402126
AT3G12280	protein_coding	RBR1 (RETINOBLASTOMA-RELATED 1)	Encodes a retinoblastoma homologue RETINOBLASTOMA-RELATED protein (RBR or RBR1). RBR controls nuclear proliferation in the female gametophyte. RBR also regulates stem cell maintenance in Arabidopsis roots.	similar to retinoblastoma-related protein 1 [Populus tremula x Populus tremuloides] (GB:AAF61377.1); similar to retinoblastoma-related protein [Medicago sativa] (GB:AAY23367.1); similar to unnamed protein product [Vitis vinifera] (GB:CAO43963.1); contains	0	1	0	0	0	#DIV/0!	0	1	0	1.65754	0.0332185
AT3G12290	protein_coding	tetrahydrofolate dehydrogenase/cyclohydrolase, putative		similar to tetrahydrofolate dehydrogenase/cyclohydrolase, putative [Arabidopsis thaliana] (TAIR:AT4G00620.1); similar to unnamed protein product [Vitis vinifera] (GB:CAO39977.1); contains InterPro domain NAD(P)-binding; (InterPro:IPR016040); contains Inte	0	0	#DIV/0!	0	3	0	0	3	0	0.824358	0.329033
AT3G12930	protein_coding			similar to unknown [Populus trichocarpa] (GB:ABK94112.1); contains InterPro domain Iojap-related protein (InterPro:IPR004394)	0	0	#DIV/0!	0	1	0	0	1	0	1.48994	0.119017
AT3G13120	protein_coding	30S ribosomal protein S10, chloroplast, putative		Identical to 30S ribosomal protein S10, chloroplast precursor (RPS10) [Arabidopsis Thaliana] (GB:Q9LK61); similar to 30S ribosomal protein S10-like [Brassica rapa] (GB:ABL97980.1); contains InterPro domain Ribosomal protein S10, bacterial; (InterPro:IPR00	0	1	0	0	0	#DIV/0!	0	1	0	0.884592	0.296836
AT3G13410	protein_coding			similar to unknown protein [Arabidopsis thaliana] (TAIR:AT1G55546.1); similar to hypothetical protein [Vitis vinifera] (GB:CAN72399.1)	0	1	0	0	1	0	0	2	0	0.934242	0.660671
AT3G13520	protein_coding	AGP12 (ARABINOGALACTAN PROTEIN 12)	Encodes a GPI-anchored arabinogalactan (AG) peptide with a short 'classical' backbone of 10 amino acids, seven of which are conserved among the 4 other Arabidopsis AG peptides. These peptides may be involved in cell signaling.	Identical to Arabinogalactan peptide 12 precursor (AGP12) [Arabidopsis Thaliana] (GB:Q9LJD9); similar to AGP21 (ARABINOGALACTAN PROTEIN 21) [Arabidopsis thaliana] (TAIR:AT1G55330.1); similar to unknown [Brassica rapa] (GB:ABB97032.1)	0	0	#DIV/0!	0	1	0	0	1	0	1.0363	0.859944
AT3G13680	protein_coding	F-box family protein		Identical to F-box/Kelch-repeat protein At3g13680 [Arabidopsis Thaliana] (GB:Q9LID1); similar to F-box family protein [Arabidopsis thaliana] (TAIR:AT4G17200.1); similar to S-locus F-box-like protein d [Petunia integrifolia subsp. inflata] (GB:ABX82524.1);	0	0	#DIV/0!	0	1	0	0	1	0	1.08151	0.468828
AT3G13772	protein_coding	endomembrane protein 70, putative		similar to endomembrane protein 70, putative [Arabidopsis thaliana] (TAIR:AT5G25100.1); similar to endomembrane protein 70, putative [Arabidopsis thaliana] (TAIR:AT5G10840.1); similar to endomembrane protein 70, putative [Arabidopsis thaliana] (TAIR:AT1G5	0	1	0	0	1	0	0	2	0	1.07323	0.608571
AT3G14010	protein_coding	CID4 (CTC-Interacting Domain 4); protein binding	hydroxyproline-rich glycoprotein family protein, similar to Mrs16p (GI:2737884) (Saccharomyces cerevisiae); weak similarity to ataxin-2 related protein (GI:1679686) (Homo sapiens). Included in a family of CTC interacting domain proteins found to interact	similar to CID3 (CTC-Interacting Domain 3) [Arabidopsis thaliana] (TAIR:AT1G54170.1); similar to unnamed protein product [Vitis vinifera] (GB:CAO45647.1); contains InterPro domain Ataxin-2, N-terminal (InterPro:IPR009604)	0	0	#DIV/0!	0	1	0	0	1	0	0.965407	0.777422
AT3G14090	protein_coding	ATEXO70D3 (exocyst subunit EXO70 family protein D3); protein binding	A member of EXO70 gene family, putative exocyst subunits, conserved in land plants. Arabidopsis thaliana contains 23 putative EXO70 genes, which can be classified into eight clusters on the phylogenetic tree.	similar to ATEXO70D1 (exocyst subunit EXO70 family protein D1), protein binding [Arabidopsis thaliana] (TAIR:AT1G72470.1); similar to ATEXO70D2 (exocyst subunit EXO70 family protein D2), protein binding [Arabidopsis thaliana] (TAIR:AT1G54090.1); similar t	0	0	#DIV/0!	0	1	0	0	1	0	1.24274	0.287298
AT3G14110	protein_coding	FLU (FLUORESCENT IN BLUE LIGHT); binding	Encodes a novel coiled-coil, TPR domain containing protein that is localized to the chloroplast membrane and is involved in chlorophyll biosynthesis. Mutants accumulate protochlorophyllide, an intermediate in the chlorophyll biosynthesis pathway, in dark	similar to unnamed protein product [Vitis vinifera] (GB:CAO45591.1); contains InterPro domain Tetratricopeptide-like helical; (InterPro:IPR011990); contains InterPro domain Tetratricopeptide TPR-1 (InterPro:IPR001440); contains InterPro domain Tetratricop	0	0	#DIV/0!	0	1	0	0	1	0	0.957787	0.697448
AT3G14270	protein_coding	phosphatidylinositol-4-phosphate 5-kinase family protein	Encodes a FYVE domain protein containing the following domains: FYVE + Chaperonin + PIP5K.	similar to 1-phosphatidylinositol-4-phosphate 5-kinase/ zinc ion binding [Arabidopsis thaliana] (TAIR:AT4G33240.1); similar to unknown protein [Arabidopsis thaliana] (TAIR:AT4G33240.2); similar to phosphatidylinositol-4-phosphate 5-kinase family protein [	0	0	#DIV/0!	0	2	0	0	2	0	0.89599	0.605411
AT3G14280	protein_coding			similar to hypothetical protein [Vitis vinifera] (GB:CAN62135.1)	0	1	0	0	0	#DIV/0!	0	1	0	1.10723	0.211025
AT3G14350	protein_coding	SRF7 (STRUBBELIG-RECEPTOR FAMILY 7); ATP binding / protein serine/threonine kinase		Identical to Protein STRUBBELIG-RECEPTOR FAMILY 7 precursor (SRF7) [Arabidopsis Thaliana] (GB:Q9LUL4;GB:Q3EB62;GB:Q3EB63); similar to SRF6 (STRUBBELIG-RECEPTOR FAMILY 6), ATP binding / protein serine/threonine kinase [Arabidopsis thaliana] (TAIR:AT1G5373	0	0	#DIV/0!	0	1	0	0	1	0	0.615116	0.156345
AT3G14362	protein_coding	DVL19/RTFL10 (ROTUNDIFOLIA LIKE 10)		similar to RTFL9 (ROTUNDIFOLIA LIKE 9) [Arabidopsis thaliana] (TAIR:AT1G53708.1); similar to unnamed protein product [Vitis vinifera] (GB:CAO45529.1); contains InterPro domain DVL (InterPro:IPR012552)	0	1	0	0	0	#DIV/0!	0	1	0
AT3G14660	protein_coding	CYP72A13 (cytochrome P450, family 72, subfamily A, polypeptide 13); oxygen binding	putative cytochrome P450	similar to CYP72A15 (cytochrome P450, family 72, subfamily A, polypeptide 15), oxygen binding [Arabidopsis thaliana] (TAIR:AT3G14690.1); similar to CYP72A14 (cytochrome P450, family 72, subfamily A, polypeptide 14), oxygen binding [Arabidopsis thaliana] (	0	1	0	0	0	#DIV/0!	0	1	0	0.860706	0.653077
AT3G14670	protein_coding	unknown protein			0	0	#DIV/0!	0	1	0	0	1	0	1.04641	0.66047
AT3G14690	protein_coding	CYP72A15 (cytochrome P450, family 72, subfamily A, polypeptide 15); oxygen binding	putative cytochrome P450	similar to CYP72A14 (cytochrome P450, family 72, subfamily A, polypeptide 14), oxygen binding [Arabidopsis thaliana] (TAIR:AT3G14680.1); similar to CYP72A13 (cytochrome P450, family 72, subfamily A, polypeptide 13), oxygen binding [Arabidopsis thaliana] (	0	0	#DIV/0!	0	2	0	0	2	0	0.474476	0.0702451
AT3G14860	protein_coding	NHL repeat-containing protein		similar to NHL repeat-containing protein [Arabidopsis thaliana] (TAIR:AT1G70280.2); similar to unnamed protein product [Vitis vinifera] (GB:CAO39423.1); contains InterPro domain NHL repeat (InterPro:IPR001258); contains InterPro domain Six-bladed beta-pro	0	0	#DIV/0!	0	1	0	0	1	0	0.997558	0.993588
AT3G14960	protein_coding	galactosyltransferase family protein		similar to galactosyltransferase family protein [Arabidopsis thaliana] (TAIR:AT1G53290.1); similar to UCW98, putative galactosyltransferease [Hordeum vulgare subsp. vulgare] (GB:ABL11234.1); contains InterPro domain Glycosyl transferase, family 31; (Inter	0	0	#DIV/0!	0	1	0	0	1	0	0.98258	0.892608
AT3G15115	protein_coding			similar to unknown protein [Arabidopsis thaliana] (TAIR:AT1G53180.1)	0	0	#DIV/0!	0	2	0	0	2	0
AT3G15180	protein_coding	proteasome-related		similar to unnamed protein product [Vitis vinifera] (GB:CAO39322.1); contains InterPro domain Armadillo-type fold; (InterPro:IPR016024)	0	0	#DIV/0!	0	1	0	0	1	0	0.935118	0.620933
AT3G15510	protein_coding	ATNAC2 (Arabidopsis thaliana NAC domain containing protein 2); transcription factor	Note of caution: not to be confused with another protein (AtNAC6 locus AT5G39610) which on occasion has also been referred to as AtNAC2.	similar to NAM (Arabidopsis NAC domain containing protein 18), transcription factor [Arabidopsis thaliana] (TAIR:AT1G52880.1); similar to unnamed protein product [Vitis vinifera] (GB:CAO39227.1); contains InterPro domain No apical meristem (NAM) protein;	0	0	#DIV/0!	0	2	0	0	2	0	1.15173	0.452823
AT3G15840	protein_coding	PIFI (POST-ILLUMINATION CHLOROPHYLL FLUORESCENCE INCREASE)	Encodes a chloroplast-targeted protein localized in the stroma that is a novel component essential for NDH-mediated non-photochemical reduction of the plastoquinone pool in chlororespiratory electron transport.	similar to chloroplast post-illumination chlorophyll fluorescence increase protein [Nicotiana tabacum] (GB:ABI51594.1)	0	1	0	0	2	0	0	3	0	0.565028	0.0896185
AT3G15870	protein_coding	fatty acid desaturase family protein		Identical to Probable lipid desaturase ADS3.2, chloroplast precursor (ADS3.2) [Arabidopsis Thaliana] (GB:Q9LVZ3;GB:Q5IGR4); similar to FAD5 (FATTY ACID DESATURASE 5), oxidoreductase [Arabidopsis thaliana] (TAIR:AT3G15850.1); similar to unnamed protein pr	0	0	#DIV/0!	0	1	0	0	1	0	1.02272	0.895948
AT3G16190	protein_coding	isochorismatase hydrolase family protein		similar to unnamed protein product [Vitis vinifera] (GB:CAO45872.1); contains InterPro domain Isochorismatase hydrolase; (InterPro:IPR000868)	0	0	#DIV/0!	0	1	0	0	1	0	0.920549	0.754292
AT3G16830	protein_coding	TPR2 (TOPLESS-RELATED 2)		similar to TPL/WSIP1 (WUS-INTERACTING PROTEIN 1) [Arabidopsis thaliana] (TAIR:AT1G15750.3); similar to TPR3 (TOPLESS-RELATED 3) [Arabidopsis thaliana] (TAIR:AT5G27030.1); similar to TPL/WSIP1 (WUS-INTERACTING PROTEIN 1) [Arabidopsis thaliana] (TAIR:AT1G15	0	0	#DIV/0!	0	1	0	0	1	0	0.917028	0.420095
AT3G17070	protein_coding	peroxidase, putative		Identical to Peroxidase 29 precursor (PER29) [Arabidopsis Thaliana] (GB:Q9LSP0); similar to peroxidase, putative [Arabidopsis thaliana] (TAIR:AT5G40150.1); similar to unnamed protein product [Vitis vinifera] (GB:CAO44920.1); contains InterPro domain Plan	0	0	#DIV/0!	0	1	0	0	1	0
AT3G17160	protein_coding			similar to unknown protein [Arabidopsis thaliana] (TAIR:AT1G47970.1)	0	0	#DIV/0!	0	0	#DIV/0!	0	2	0	1.34108	0.651496
AT3G17430	protein_coding	phosphate translocator-related		similar to phosphate translocator-related [Arabidopsis thaliana] (TAIR:AT1G48230.1); similar to unknown [Populus trichocarpa] (GB:ABK94812.1); contains InterPro domain Protein of unknown function DUF250 (InterPro:IPR004853)	0	0	#DIV/0!	0	1	0	0	1	0	0.794163	0.0219932
AT3G17440	protein_coding	NPSN13 (novel plant SNARE 13)	member of NPSN Gene Family	Identical to Novel plant SNARE 13 (NPSN13) [Arabidopsis Thaliana] (GB:Q9LRP1); similar to ATNPSN12 (novel plant SNARE 12), protein transporter [Arabidopsis thaliana] (TAIR:AT1G48240.1); similar to unnamed protein product [Vitis vinifera] (GB:CAO70926.1);	0	0	#DIV/0!	0	2	0	0	2	0	0.951948	0.708118
AT3G17450	protein_coding	hAT dimerisation domain-containing protein		similar to hAT dimerisation domain-containing protein [Arabidopsis thaliana] (TAIR:AT3G22220.2); similar to hAT dimerisation domain-containing protein [Arabidopsis thaliana] (TAIR:AT3G22220.1); similar to hypothetical protein [Nicotiana tabacum] (GB:CAB39	0	1	0	0	0	#DIV/0!	0	1	0	1.07835	0.0367324
AT3G17470	protein_coding	RelA/SpoT domain-containing protein / calcium-binding EF-hand family protein		similar to RSH3 (RELA/SPOT HOMOLOG 3), catalytic [Arabidopsis thaliana] (TAIR:AT1G54130.1); similar to unnamed protein product [Vitis vinifera] (GB:CAO70932.1); contains InterPro domain EF-Hand type; (InterPro:IPR011992); contains InterPro domain Calcium-	0	0	#DIV/0!	0	1	0	0	1	0	0.967778	0.845339
AT3G17800	protein_coding		mRNA level of the MEB5.2 gene (At3g17800) remains unchanged after cutting the inflorescence stem	similar to unknown protein [Arabidopsis thaliana] (TAIR:AT1G48450.1); similar to unnamed protein product [Vitis vinifera] (GB:CAO69430.1); contains InterPro domain Protein of unknown function DUF760 (InterPro:IPR008479)	0	0	#DIV/0!	0	1	0	0	1	0	1.00657	0.958044
AT3G17890	protein_coding	unknown protein			0	1	0	0	0	#DIV/0!	0	1	0	1.01903	0.818662
AT3G17930	protein_coding			similar to unknown [Populus trichocarpa] (GB:ABK96142.1)	0	0	#DIV/0!	0	1	0	0	1	0	0.991072	0.958629
AT3G17970	protein_coding	ATTOC64-III (ARABIDOPSIS THALIANA TRANSLOCON AT THE OUTER MEMBRANE OF CHLOROPLASTS 64-III); binding / carbon-nitrogen ligase, with glutamine as amido-N-donor		similar to ATTOC64-V/MTOM64 (ARABIDOPSIS THALIANA TRANSLOCON AT THE OUTER MEMBRANE OF CHLOROPLASTS 64-V), amidase [Arabidopsis thaliana] (TAIR:AT5G09420.1); similar to unnamed protein product [Vitis vinifera] (GB:CAO68190.1); similar to Toc64 [Pisum sativ	0	0	#DIV/0!	0	1	0	0	1	0	0.857575	0.463843
AT3G18140	protein_coding	transducin family protein / WD-40 repeat family protein		similar to transducin family protein / WD-40 repeat family protein [Arabidopsis thaliana] (TAIR:AT2G22040.1); similar to unnamed protein product [Vitis vinifera] (GB:CAO23544.1); contains InterPro domain WD40 repeat-like (InterPro:IPR011046); contains Int	0	0	#DIV/0!	0	3	0	0	3	0
AT3G18190	protein_coding	chaperonin, putative		similar to T-complex protein 1 epsilon subunit, putative / TCP-1-epsilon, putative / chaperonin, putative [Arabidopsis thaliana] (TAIR:AT1G24510.1); similar to unnamed protein product [Vitis vinifera] (GB:CAO68126.1); similar to hypothetical protein [Viti	0	1	0	0	0	#DIV/0!	0	1	0	0.819586	0.0879492
AT3G18270	protein_coding	CYP77A5P (cytochrome P450, family 77, subfamily A, polypeptide 5 pseudogene); catalytic	a cytochrome P450 pseudogene. the second half of the gene overlaps perfectly with the other gene model.	similar to unnamed protein product [Vitis vinifera] (GB:CAO68104.1); contains InterPro domain Mandelate racemase/muconate lactonizing enzyme, C-terminal (InterPro:IPR013342); contains InterPro domain Mandelate racemase/muconate lactonizing enzyme; (InterP	0	1	0	0	0	#DIV/0!	0	1	0	1.08129	0.683143
AT3G18370	protein_coding	ATSYTF/NTMC2T3/NTMC2TYPE3/SYTF		similar to ATSYTD/NTMC2T2.2/NTMC2TYPE2.2/SYTD [Arabidopsis thaliana] (TAIR:AT5G11100.1); similar to hypothetical protein [Vitis vinifera] (GB:CAN72583.1); similar to unnamed protein product [Vitis vinifera] (GB:CAO49328.1); similar to unnamed protein prod	0	0	#DIV/0!	0	1	0	0	1	0	1.24712	0.119696
AT2G36190	protein_coding	ATCWINV4 (ARABIDOPSIS THALIANA CELL WALL INVERTASE 4); hydrolase, hydrolyzing O-glycosyl compounds		similar to ATCWINV2 (ARABIDOPSIS THALIANA CELL WALL INVERTASE 2), hydrolase, hydrolyzing O-glycosyl compounds [Arabidopsis thaliana] (TAIR:AT3G52600.2); similar to ATCWINV2 (ARABIDOPSIS THALIANA CELL WALL INVERTASE 2), hydrolase, hydrolyzing O-glycosyl co	25	12	2.08333	6	18	0.333333	30	30	1	1.07473	0.332163
AT3G18480	protein_coding	CCAAT displacement protein-related / CDP-related	This gene is predicted to encode a protein that functions as a Golgi apparatus structural component, known as a golgin in mammals and yeast. A fluorescently-tagged version of CASP co-localizes with Golgi markers, and this localization appears to require	Identical to Protein CASP (CASP) [Arabidopsis Thaliana] (GB:Q9LS42;GB:Q93ZW7); similar to ZWI (ZWICHEL), calmodulin binding / microtubule motor [Arabidopsis thaliana] (TAIR:AT5G65930.2); similar to ZWI (ZWICHEL), calmodulin binding / microtubule motor [Ar	0	0	#DIV/0!	0	1	0	0	1	0	1.0329	0.778793
AT3G18490	protein_coding	aspartyl protease family protein		similar to aspartyl protease family protein [Arabidopsis thaliana] (TAIR:AT1G25510.1); similar to unknown [Populus trichocarpa] (GB:ABK94105.1); contains InterPro domain Peptidase aspartic, catalytic; (InterPro:IPR009007); contains InterPro domain Peptida	0	1	0	0	0	#DIV/0!	0	1	0	1.4564	0.00617093
AT3G18730	protein_coding	TSK (TONSOKU)	Encodes a protein with an important role in cell division control and plant morphogenesis and may also play a role in genome maintenance. May be involved in mitosis through interaction with TSA1. In cells synchronized for cell division, TSA1 and TSK relo	Identical to Protein BRUSHY 1 (BRU1) [Arabidopsis Thaliana] (GB:Q6Q4D0;GB:Q6IE93;GB:Q769D5;GB:Q7XAG5;GB:Q9LSA4); similar to EMB2004 (EMBRYO DEFECTIVE 2004), protein binding [Arabidopsis thaliana] (TAIR:AT1G10510.1); similar to unnamed protein product [Vi	0	1	0	0	0	#DIV/0!	0	1	0
AT3G18940	protein_coding	clast3-related		similar to hypothetical protein [Vitis vinifera] (GB:CAN60895.1); contains InterPro domain Uncharacterised conserved protein UCP010044 (InterPro:IPR016562)	0	0	#DIV/0!	0	1	0	0	1	0	0.917288	0.693801
AT3G19340	protein_coding	sodium:dicarboxylate symporter		similar to unknown protein [Arabidopsis thaliana] (TAIR:AT5G13940.1); similar to hypothetical protein OsI_004926 [Oryza sativa (indica cultivar-group)] (GB:EAY77079.1); similar to hypothetical protein OsJ_034683 [Oryza sativa (japonica cultivar-group)] (G	0	0	#DIV/0!	0	1	0	0	1	0	1.16088	0.429786
AT3G19450	protein_coding	CAD4 (CINNAMYL ALCOHOL DEHYDROGENASE 4); cinnamyl-alcohol dehydrogenase	Encodes a catalytically active cinnamyl alcohol dehydrogenase which uses p-coumaryl aldehyde as a preferred substrate. It can also use caffeyl, coniferyl and d-hydroxyconiferyl aldehydes as substrates.	Identical to Cinnamyl-alcohol dehydrogenase (CAD) [Arabidopsis Thaliana] (GB:P48523); similar to CAD5 (CINNAMYL ALCOHOL DEHYDROGENASE 5), cinnamyl-alcohol dehydrogenase [Arabidopsis thaliana] (TAIR:AT4G34230.1); similar to cinnamoyl alcohol dehydrogenase	0	0	#DIV/0!	0	1	0	0	1	0	1.73678	0.0424796
AT3G19460	protein_coding	reticulon family protein (RTNLB11)		similar to reticulon family protein (RTNLB10) [Arabidopsis thaliana] (TAIR:AT2G15280.1); similar to Os04g0670000 [Oryza sativa (japonica cultivar-group)] (GB:NP_001054209.1); similar to H0818H01.12 [Oryza sativa (indica cultivar-group)] (GB:CAJ86090.1); c	0	0	#DIV/0!	0	1	0	0	1	0	1.08215	0.719908
AT3G19553	protein_coding	amino acid permease family protein		similar to amino acid permease family protein [Arabidopsis thaliana] (TAIR:AT1G31830.2); similar to amino acid permease family protein [Arabidopsis thaliana] (TAIR:AT1G31830.1); similar to unnamed protein product [Vitis vinifera] (GB:CAO63956.1); contains	0	0	#DIV/0!	0	1	0	0	1	0	0.886957	0.555458
AT3G19590	protein_coding	WD-40 repeat family protein / mitotic checkpoint protein, putative		similar to WD-40 repeat family protein / mitotic checkpoint protein, putative [Arabidopsis thaliana] (TAIR:AT1G49910.1); similar to unknown [Picea sitchensis] (GB:ABK21756.1); contains InterPro domain WD40 repeat-like (InterPro:IPR011046); contains InterP	0	1	0	0	0	#DIV/0!	0	1	0	0.981907	0.914302
AT3G19650	protein_coding	cyclin-related		similar to DEAD box RNA helicase, putative [Arabidopsis thaliana] (TAIR:AT1G20920.1); similar to unnamed protein product [Vitis vinifera] (GB:CAO63975.1)	0	0	#DIV/0!	0	1	0	0	1	0	0.710555	0.272198
AT3G19670	protein_coding	FF domain-containing protein / WW domain-containing protein		similar to protein binding [Arabidopsis thaliana] (TAIR:AT1G44910.1); similar to unknown protein [Arabidopsis thaliana] (TAIR:AT1G44910.2); similar to unnamed protein product [Vitis vinifera] (GB:CAO61506.1); contains InterPro domain FF (InterPro:IPR00271	0	0	#DIV/0!	0	1	0	0	1	0	0.957789	0.830185
AT3G20000	protein_coding	TOM40 (translocase of the outer mitochondrial membrane 40); voltage-gated anion channel	Encodes a component of the TOM receptor complex responsible for the recognition and translocation of cytosolically synthesized mitochondrial preproteins. With TOM22, functions as the transit peptide receptor at the surface of the mitochondrial outer membr	Identical to Mitochondrial import receptor subunit TOM40 homolog 1 (TOM40-1) [Arabidopsis Thaliana] (GB:Q9LHE5); similar to porin family protein [Arabidopsis thaliana] (TAIR:AT1G50400.1); similar to unnamed protein product [Vitis vinifera] (GB:CAO67829.1	0	0	#DIV/0!	0	1	0	0	1	0	0.91644	0.382599
AT3G20020	protein_coding	protein arginine N-methyltransferase family protein		Identical to Probable protein arginine N-methyltransferase 6 (PRMT6) [Arabidopsis Thaliana] (GB:Q08A71;GB:Q9LJZ9); similar to protein arginine N-methyltransferase, putative [Arabidopsis thaliana] (TAIR:AT2G19670.1); similar to unnamed protein product [Vi	0	0	#DIV/0!	0	1	0	0	1	0	0.993894	0.965888
AT3G20130	protein_coding	CYP705A22 (cytochrome P450, family 705, subfamily A, polypeptide 22); oxygen binding	member of CYP705A	similar to CYP705A30 (cytochrome P450, family 705, subfamily A, polypeptide 30), oxygen binding [Arabidopsis thaliana] (TAIR:AT3G20940.1); similar to unnamed protein product [Vitis vinifera] (GB:CAO15083.1); contains InterPro domain Cytochrome P450, E-cla	0	1	0	0	0	#DIV/0!	0	1	0	1.21231	0.384297
AT3G20210	protein_coding	DELTA-VPE (delta vacuolar processing enzyme); cysteine-type endopeptidase	Encodes a vacuolar processing enzyme with caspase-1-like activity that is specifically expressed in inner integument of developing seeds. Mutants display abnormal seed coat development. It is speculated to be involved in cell death of limited cell layer	similar to GAMMA-VPE (Vacuolar processing enzyme gamma), cysteine-type endopeptidase [Arabidopsis thaliana] (TAIR:AT4G32940.1); similar to hypothetical protein [Vitis vinifera] (GB:CAN70603.1); contains InterPro domain Peptidase C13, legumain; (InterPro:I	0	1	0	0	1	0	0	2	0	1.08814	0.817976
AT3G20230	protein_coding	50S ribosomal protein L18 family		similar to structural constituent of ribosome [Arabidopsis thaliana] (TAIR:AT1G08845.1); similar to unnamed protein product [Vitis vinifera] (GB:CAO48120.1); contains InterPro domain Ribosomal protein L18/L5; (InterPro:IPR005484)	0	1	0	0	0	#DIV/0!	0	1	0	0.851018	0.604418
AT3G20480	protein_coding	tetraacyldisaccharide 4'-kinase family protein		similar to unnamed protein product [Vitis vinifera] (GB:CAO38939.1); contains InterPro domain Tetraacyldisaccharide-1-P 4&apos; (InterPro:IPR003758)	0	0	#DIV/0!	0	1	0	0	1	0	0.959177	0.681123
AT3G20510	protein_coding			similar to unknown protein [Arabidopsis thaliana] (TAIR:AT1G50740.1); similar to unnamed protein product [Vitis vinifera] (GB:CAO38976.1); contains InterPro domain Protein of unknown function UPF0136, Transmembrane; (InterPro:IPR005349)	0	1	0	0	0	#DIV/0!	0	1	0	1.15262	0.364809
AT3G20770	protein_coding	EIN3 (ETHYLENE-INSENSITIVE3); transcription factor	ethylene-insensitive3	Identical to Protein ETHYLENE-INSENSITIVE 3 (EIN3) [Arabidopsis Thaliana] (GB:O24606;GB:Q8VYW4); similar to EIL1 (ETHYLENE-INSENSITIVE3-LIKE 1), transcription factor [Arabidopsis thaliana] (TAIR:AT2G27050.1); similar to EIL2 [Nicotiana tabacum] (GB:AAP039	0	0	#DIV/0!	0	1	0	0	1	0	0.964186	0.823093
AT3G21160	protein_coding	mannosyl-oligosaccharide 1,2-alpha-mannosidase, putative		similar to mannosyl-oligosaccharide 1,2-alpha-mannosidase, putative [Arabidopsis thaliana] (TAIR:AT1G51590.2); similar to mannosyl-oligosaccharide 1,2-alpha-mannosidase, putative [Arabidopsis thaliana] (TAIR:AT1G51590.1); similar to unnamed protein produc	0	1	0	0	0	#DIV/0!	0	1	0	1.50382	0.199284
AT3G21200	protein_coding			similar to hypothetical protein [Vitis vinifera] (GB:CAN79599.1); contains InterPro domain FMN-binding split barrel, related (InterPro:IPR009002)	0	0	#DIV/0!	0	1	0	0	1	0	1.17211	0.0726398
AT3G21640	protein_coding	TWD1 (TWISTED DWARF 1); FK506 binding / peptidyl-prolyl cis-trans isomerase	encodes a 42 kDa FK506-binding protein (AtFKBP42) that possesses similarity to multidomain peptidyl-prolyl cis/trans isomerases (PPIases, EC 5.2.1.8), which are known to be components of mammalian steroid hormone receptor complexes. The protein appears to	Identical to 42 kDa peptidyl-prolyl isomerase (FKBP42) [Arabidopsis Thaliana] (GB:Q9LDC0;GB:Q8RWM0); similar to ROF1 (ROTAMASE FKBP 1), FK506 binding / calmodulin binding / peptidyl-prolyl cis-trans isomerase [Arabidopsis thaliana] (TAIR:AT3G25230.1); si	0	1	0	0	0	#DIV/0!	0	1	0	0.960374	0.874855
AT3G21690	protein_coding	MATE efflux family protein		similar to MATE efflux family protein [Arabidopsis thaliana] (TAIR:AT1G61890.1); similar to unnamed protein product [Vitis vinifera] (GB:CAO17929.1); similar to unnamed protein product [Vitis vinifera] (GB:CAO24133.1); similar to unnamed protein product [	0	0	#DIV/0!	0	1	0	0	1	0	1.35306	0.236711
AT3G21865	protein_coding	PEX22 (PEROXIN 22); protein binding	Interacts with PEX4 in a yeast two-hybrid. The PEX4 and PEX22 pair may be important during the remodeling of peroxisome matrix contents as glyoxysomes transition to leaf peroxisomes.	similar to unnamed protein product [Vitis vinifera] (GB:CAO24163.1)	0	0	#DIV/0!	0	2	0	0	2	0	0.995287	0.967682
AT3G21870	protein_coding	CYCP2;1 (cyclin p2;1); cyclin-dependent protein kinase		Identical to Cyclin-U1-1 (CYCU1-1) [Arabidopsis Thaliana] (GB:Q9LJ45); similar to CYCP4,1 (cyclin p4,1), cyclin-dependent protein kinase [Arabidopsis thaliana] (TAIR:AT2G44740.1); similar to unnamed protein product [Vitis vinifera] (GB:CAO24164.1); conta	0	4	0	0	0	#DIV/0!	0	4	0	1.27725	0.306647
AT3G22200	protein_coding	POP2 (POLLEN-PISTIL INCOMPATIBILITY 2); 4-aminobutyrate transaminase	Genetically redundant with POP3;mediates pollen tube guidance. Double mutants are self sterile; gamma-aminobutyrate transaminase subunit precursor; nuclear gene for mitochondrial product. Encodes gamma-aminobutyrate transaminase that uses pyruvate instead	similar to acetylornithine aminotransferase, mitochondrial, putative / acetylornithine transaminase, putative / AOTA, putative / ACOAT, putative [Arabidopsis thaliana] (TAIR:AT1G80600.1); similar to hypothetical protein OsI_027210 [Oryza sativa (indica cu	0	1	0	0	0	#DIV/0!	0	1	0	0.81178	0.408698
AT3G22290	protein_coding			similar to unknown protein [Arabidopsis thaliana] (TAIR:AT1G36050.1); similar to unknown [Populus trichocarpa] (GB:ABK93267.1); contains InterPro domain Protein of unknown function DUF1692 (InterPro:IPR012936)	0	0	#DIV/0!	0	1	0	0	1	0	1.47785	0.210794
AT3G22425	protein_coding	IGPD; imidazoleglycerol-phosphate dehydratase	Encodes imidazoleglycerolphosphate dehydratase.	Identical to Imidazoleglycerol-phosphate dehydratase 1 [Arabidopsis Thaliana] (GB:P34047;GB:Q8VYM1); similar to imidazoleglycerol-phosphate dehydratase, putative [Arabidopsis thaliana] (TAIR:AT4G14910.1); similar to imidazoleglycerol-phosphate dehydratas	0	1	0	0	1	0	0	2	0
AT3G22880	protein_coding	ATDMC1 (RECA-LIKE GENE); ATP binding / DNA-dependent ATPase/ damaged DNA binding	Expression of the AtDMC1 is restricted to pollen mother cells in anthers and to megaspore mother cells in ovules. Similar to meiosis-specific yeast DMC gene.	Identical to Meiotic recombination protein DMC1 homolog (LIM15) [Arabidopsis Thaliana] (GB:Q39009;GB:P93001;GB:Q4V3A9;GB:Q9LIL0); similar to ATRAD51 (Arabidopsis thaliana Ras Associated with Diabetes protein 51), damaged DNA binding [Arabidopsis thaliana]	0	1	0	0	0	#DIV/0!	0	1	0	1.01625	0.831249
AT3G22942	protein_coding	AGG2 (G-PROTEIN GAMMA SUBUNIT 2)	heterotrimeric G-protein gamma subunit 2(AGG2)	similar to AGG1 (ARABIDOPSIS GGAMMA-SUBUNIT 1) [Arabidopsis thaliana] (TAIR:AT3G63420.2); similar to AGG1 (ARABIDOPSIS GGAMMA-SUBUNIT 1) [Arabidopsis thaliana] (TAIR:AT3G63420.1); similar to unnamed protein product [Vitis vinifera] (GB:CAO71267.1)	0	0	#DIV/0!	0	1	0	0	1	0
AT3G23000	protein_coding	CIPK7 (CBL-INTERACTING PROTEIN KINASE 7); kinase	Encodes a serine/threonine protein kinase with similarities to CBL-interacting protein kinases, SNF1 and SOS2.	similar to CIPK4 (CBL-INTERACTING PROTEIN KINASE 4), kinase [Arabidopsis thaliana] (TAIR:AT4G14580.1); similar to unnamed protein product [Vitis vinifera] (GB:CAO71277.1); contains InterPro domain NAF; (InterPro:IPR004041); contains InterPro domain Serine	0	0	#DIV/0!	0	1	0	0	1	0	1.46102	0.302545
AT3G23080	protein_coding			similar to unknown protein [Arabidopsis thaliana] (TAIR:AT4G14500.1); similar to unnamed protein product [Vitis vinifera] (GB:CAO71306.1); contains InterPro domain Lipid-binding START (InterPro:IPR002913)	0	2	0	0	1	0	0	3	0	1.32632	0.230156
AT3G23400	protein_coding	plastid-lipid associated protein PAP / fibrillin family protein		Identical to Probable plastid-lipid-associated protein 6, chloroplast precursor (PAP6) [Arabidopsis Thaliana] (GB:Q9LW57;GB:Q8LBY7); similar to harpin binding protein 1 [Malus x domestica] (GB:AAR26482.1); contains InterPro domain Lipocalin; (InterPro:IP	0	1	0	0	1	0	0	2	0	0.896435	0.469397
AT3G23540	protein_coding			similar to unknown protein [Arabidopsis thaliana] (TAIR:AT4G14290.1); similar to unnamed protein product [Vitis vinifera] (GB:CAO71078.1); contains InterPro domain Alpha/beta hydrolase fold-1 (InterPro:IPR000073)	0	0	#DIV/0!	0	1	0	0	1	0	0.973957	0.868478
AT3G23600	protein_coding	dienelactone hydrolase family protein		similar to dienelactone hydrolase family protein [Arabidopsis thaliana] (TAIR:AT3G23570.1); similar to unnamed protein product [Vitis vinifera] (GB:CAO71083.1); contains InterPro domain Dienelactone hydrolase; (InterPro:IPR002925)	0	0	#DIV/0!	0	1	0	0	1	0	0.70281	0.00111867
AT3G24255	protein_coding			similar to unknown protein [Arabidopsis thaliana] (TAIR:AT3G23910.1); similar to unnamed protein product [Vitis vinifera] (GB:CAO43499.1); contains InterPro domain RNA-directed DNA polymerase (reverse transcriptase), related (InterPro:IPR015706)	0	0	#DIV/0!	0	1	0	0	1	0
AT3G24420	protein_coding	hydrolase, alpha/beta fold family protein		similar to hydrolase, alpha/beta fold family protein [Arabidopsis thaliana] (TAIR:AT4G37470.1); similar to unnamed protein product [Vitis vinifera] (GB:CAO65563.1); contains InterPro domain Alpha/beta hydrolase fold-1 (InterPro:IPR000073)	0	1	0	0	0	#DIV/0!	0	1	0
AT3G24840	protein_coding	SEC14 cytosolic factor, putative / phosphoglyceride transfer protein, putative		similar to SEC14 cytosolic factor, putative / phosphoglyceride transfer protein, putative [Arabidopsis thaliana] (TAIR:AT4G39170.1); similar to Os02g0721800 [Oryza sativa (japonica cultivar-group)] (GB:NP_001047963.1); similar to Os08g0341700 [Oryza sativ	0	0	#DIV/0!	0	1	0	0	1	0	0.781111	0.18203
AT3G25040	protein_coding	ER lumen protein retaining receptor, putative / HDEL receptor, putative		similar to ERD2 (ER lumen protein retaining receptor 2), receptor [Arabidopsis thaliana] (TAIR:AT1G29330.1); similar to unnamed protein product [Vitis vinifera] (GB:CAO43539.1); contains InterPro domain ER lumen protein retaining receptor; (InterPro:IPR00	0	0	#DIV/0!	0	2	0	0	2	0	1.00286	0.981676
AT3G25140	protein_coding	GAUT8/QUA1 (GALACTURONOSYLTRANSFERASE 8, QUASIMODO1); polygalacturonate 4-alpha-galacturonosyltransferase/ transferase, transferring glycosyl groups / transferase, transferring hexosyl groups	Quasimodo1, encodes a glycosyltransferase, involved in homogalacturonan biosynthesis; mutant shows cell adhesion defect and lower wall uronic acid content.	Identical to Glycosyltransferase QUASIMODO1 (QUA1) [Arabidopsis Thaliana] (GB:Q9LSG3); similar to GAUT9 (Galacturonosyltransferase 9), polygalacturonate 4-alpha-galacturonosyltransferase/ transferase, transferring glycosyl groups / transferase, transferr	0	0	#DIV/0!	0	1	0	0	1	0	0.945477	0.640177
AT3G25150	protein_coding	nuclear transport factor 2 (NTF2) family protein / RNA recognition motif (RRM)-containing protein		similar to nuclear transport factor 2 (NTF2) family protein / RNA recognition motif (RRM)-containing protein [Arabidopsis thaliana] (TAIR:AT5G60980.1); similar to nuclear transport factor 2 (NTF2) family protein / RNA recognition motif (RRM)-containing pr	0	0	#DIV/0!	0	2	0	0	2	0	0.864539	0.629355
AT3G25220	protein_coding	FKBP15-1 (FK506-binding protein 15 kD-1); FK506 binding / peptidyl-prolyl cis-trans isomerase	immunophilin (FKBP15-1)	Identical to FK506-binding protein 2-1 precursor (FKBP15-1) [Arabidopsis Thaliana] (GB:Q38935;GB:Q9LSF4); similar to FKBP15-2 (FK506-binding protein 15 kD-2), FK506 binding / peptidyl-prolyl cis-trans isomerase [Arabidopsis thaliana] (TAIR:AT5G48580.1);	0	1	0	0	0	#DIV/0!	0	1	0	1.13923	0.051908
AT3G25230	protein_coding	ROF1 (ROTAMASE FKBP 1); FK506 binding / calmodulin binding / peptidyl-prolyl cis-trans isomerase	Encodes a a high molecular weight member of the FK506 binding protein (FKBP) family. It has three FKBP12-like domains, tetratricopeptide repeats, and a putative calmodulin binding domain.	Identical to 70 kDa peptidyl-prolyl isomerase (ROF1) [Arabidopsis Thaliana] (GB:Q38931;GB:Q38949;GB:Q9LSF3); similar to peptidyl-prolyl cis-trans isomerase, putative / FK506-binding protein, putative [Arabidopsis thaliana] (TAIR:AT5G48570.1); similar to	0	3	0	0	1	0	0	4	0	0.733211	0.245794
AT3G25530	protein_coding	ATGHBDH/GHBDH; 3-hydroxybutyrate dehydrogenase/ phosphogluconate dehydrogenase (decarboxylating)	Encodes gamma-hydroxybutyrate dehydrogenase (AtGHBDH). Contains a NADP-binding domain. GHBDH is proposed to function in oxidative stress tolerance.	similar to phosphogluconate dehydrogenase (decarboxylating) [Arabidopsis thaliana] (TAIR:AT1G17650.1); similar to hypothetical protein [Vitis vinifera] (GB:CAN78910.1); contains InterPro domain 3-hydroxyacid dehydrogenase/reductase (InterPro:IPR015815); c	0	0	#DIV/0!	0	1	0	0	1	0	0.8203	0.00304675
AT3G25690	protein_coding	CHUP1 (CHLOROPLAST UNUSUAL POSITIONING 1)	actin binding protein required for normal chloroplast positioning	similar to proline-rich family protein [Arabidopsis thaliana] (TAIR:AT4G18570.1); similar to unnamed protein product [Vitis vinifera] (GB:CAO42078.1); similar to hypothetical protein OsI_035925 [Oryza sativa (indica cultivar-group)] (GB:EAY81966.1); simil	0	1	0	0	0	#DIV/0!	0	1	0	1.03851	0.676438
AT3G25700	protein_coding	chloroplast nucleoid DNA-binding protein-related		similar to aspartyl protease family protein [Arabidopsis thaliana] (TAIR:AT2G42980.1); similar to unnamed protein product [Vitis vinifera] (GB:CAO42084.1); contains InterPro domain Peptidase aspartic, catalytic; (InterPro:IPR009007); contains InterPro dom	0	0	#DIV/0!	0	1	0	0	1	0
AT3G26030	protein_coding	ATB' DELTA (Arabidopsis thaliana serine/threonine protein phosphatase 2A 55 kDa regulatory subunit B prime delta); protein phosphatase type 2A regulator	protein phosphatase 2A regulatory subunit isoform B' delta	Identical to Serine/threonine protein phosphatase 2A 55 kDa regulatory subunit B' delta isoform (B'DELTA) [Arabidopsis Thaliana] (GB:Q9ZQY6); similar to serine/threonine protein phosphatase 2A (PP2A) regulatory subunit B', putative [Arabidopsis thaliana]	0	0	#DIV/0!	0	1	0	0	1	0	1.46479	0.344121
AT3G26570	protein_coding	PHT2;1 (phosphate transporter 2;1)	low affinity phosphate transporter	Identical to Inorganic phosphate transporter 2-1, chloroplast precursor (PHT2-1) [Arabidopsis Thaliana] (GB:Q38954;GB:Q3EAZ6); similar to hypothetical protein [Vitis vinifera] (GB:CAN65936.1); similar to putative phosphate permease [Mesembryanthemum crys	0	1	0	0	0	#DIV/0!	0	1	0	1.04135	0.806199
AT3G26618	protein_coding	ERF1-3 (EUKARYOTIC RELEASE FACTOR 1-3); translation release factor		Identical to Eukaryotic peptide chain release factor subunit 1-3 (ERF1-3) [Arabidopsis Thaliana] (GB:P35614); similar to ERF1-1 (EUKARYOTIC RELEASE FACTOR 1-1), translation release factor [Arabidopsis thaliana] (TAIR:AT5G47880.1); similar to ERF1-1 (EUKA	0	0	#DIV/0!	0	1	0	0	1	0	1.02412	0.939055
AT3G26710	protein_coding			similar to unnamed protein product [Vitis vinifera] (GB:CAO49107.1)	0	0	#DIV/0!	0	1	0	0	1	0	1.21896	0.493314
AT3G27027	protein_coding			similar to unknown protein [Arabidopsis thaliana] (TAIR:AT5G40980.1); similar to unnamed protein product [Vitis vinifera] (GB:CAO49032.1)	0	1	0	0	0	#DIV/0!	0	1	0
AT3G27160	protein_coding	GHS1 (GLUCOSE HYPERSENSITIVE 1); structural constituent of ribosome	GHS1 encodes plastid ribosomal protein S21	similar to structural constituent of ribosome [Arabidopsis thaliana] (TAIR:AT5G63300.1); similar to hypothetical protein [Vitis vinifera] (GB:CAN82190.1); contains InterPro domain Ribosomal protein S21; (InterPro:IPR001911)	0	0	#DIV/0!	0	1	0	0	1	0	1.56489	0.0696865
AT3G27240	protein_coding	cytochrome c1, putative		similar to cytochrome c1, putative [Arabidopsis thaliana] (TAIR:AT5G40810.1); similar to unknown [Populus trichocarpa] (GB:ABK94651.1); contains InterPro domain Cytochrome c1; (InterPro:IPR002326); contains InterPro domain Cytochrome c, monohaem; (InterPr	0	0	#DIV/0!	0	2	0	0	2	0	0.631803	0.0170753
AT3G27310	protein_coding	PUX1 (PLANT UBX DOMAIN-CONTAINING PROTEIN 1)	encodes a protein that contains a UBX domain and regulates AtCDC48 by inhibiting its ATPase activity and by promoting the disassembly of the active hexamer. Phenotypic analysis of pux1 plants revealed that the loss of PUX1 accelerated the growth of variou	similar to unknown [Populus trichocarpa] (GB:ABK93533.1); contains InterPro domain UBX (InterPro:IPR001012)	0	0	#DIV/0!	0	1	0	0	1	0	0.984746	0.8609
AT3G27380	protein_coding	SDH2-1 (succinate dehydrogenase 2-1)	One of three isoforms of the iron-sulfur component of the succinate dehydrogenase complex, a component of the mitochondrial respiratory chain complex II. The product of the nuclear encoded gene is imported into the mitochondrion. Expressed during germina	Identical to Succinate dehydrogenase [ubiquinone] iron-sulfur subunit 1, mitochondrial precursor (SDH2-1) [Arabidopsis Thaliana] (GB:Q8LBZ7;GB:Q9G3M0;GB:Q9LTZ2); similar to SDH2-2 (succinate dehydrogenase 2-2) [Arabidopsis thaliana] (TAIR:AT5G40650.1); s	0	0	#DIV/0!	0	1	0	0	1	0	0.706852	0.0336919
AT3G27570	protein_coding			similar to unknown protein [Arabidopsis thaliana] (TAIR:AT5G40510.1); similar to unnamed protein product [Vitis vinifera] (GB:CAO14698.1); contains InterPro domain Thioredoxin-like fold (InterPro:IPR012336); contains InterPro domain Thioredoxin fold (Inte	0	0	#DIV/0!	0	1	0	0	1	0	0.842591	0.631326
AT3G27670	protein_coding	RST1 (RESURRECTION1); binding	A novel protein, did not show high similarity to any protein of known function; reveals a novel genetic connection between lipid synthesis and embryo development. Expressed in all tissues examined including leaves, flowers, roots, stems, and siliques, but	similar to unnamed protein product [Vitis vinifera] (GB:CAO14717.1); similar to hypothetical protein OsI_000548 [Oryza sativa (indica cultivar-group)] (GB:EAY72701.1); similar to hypothetical protein OsJ_000525 [Oryza sativa (japonica cultivar-group)] (GB	0	2	0	0	0	#DIV/0!	0	2	0	1.08768	0.659716
AT3G28340	protein_coding	GATL10 (Galacturonosyltransferase-like 10); polygalacturonate 4-alpha-galacturonosyltransferase/ transferase, transferring hexosyl groups	Encodes a protein with putative galacturonosyltransferase activity.	similar to GATL9/LGT8 (Galacturonosyltransferase-like 9) [Arabidopsis thaliana] (TAIR:AT1G70090.2); similar to GATL9/LGT8 (Galacturonosyltransferase-like 9), polygalacturonate 4-alpha-galacturonosyltransferase/ transferase, transferring glycosyl groups /	0	0	#DIV/0!	0	1	0	0	1	0	1.0104	0.927277
AT3G28460	protein_coding			similar to hypothetical protein [Vitis vinifera] (GB:CAN74970.1); contains InterPro domain Protein of unknown function methylase putative (InterPro:IPR016065)	0	0	#DIV/0!	0	1	0	0	1	0	1.04453	0.860601
AT3G28880	protein_coding	protein binding		similar to ankyrin repeat family protein [Arabidopsis thaliana] (TAIR:AT2G03430.1); similar to hypothetical protein [Vitis vinifera] (GB:CAN60905.1); contains InterPro domain Ankyrin (InterPro:IPR002110)	0	1	0	0	0	#DIV/0!	0	1	0
AT3G28920	protein_coding	ATHB34 (ARABIDOPSIS THALIANA HOMEOBOX PROTEIN 34); DNA binding / transcription factor		similar to ATHB23 (ARABIDOPSIS THALIANA HOMEOBOX PROTEIN 23), DNA binding / transcription factor [Arabidopsis thaliana] (TAIR:AT5G39760.1); similar to unnamed protein product [Vitis vinifera] (GB:CAO14979.1); contains InterPro domain Homeobox domain, ZF-H	0	0	#DIV/0!	0	1	0	0	1	0	1.43626	0.362218
AT3G28940	protein_coding	avirulence-responsive protein, putative / avirulence induced gene (AIG) protein, putative		similar to AIG2 (AVRRPT2-INDUCED GENE 2) [Arabidopsis thaliana] (TAIR:AT3G28930.1); similar to avirulence-responsive protein-related protein [Brassica rapa] (GB:ABV89638.1); contains InterPro domain AIG2-like (InterPro:IPR009288)	0	0	#DIV/0!	0	1	0	0	1	0	0.731694	0.0860027
AT3G28970	protein_coding	AAR3 (ANTIAUXIN-RESISTANT 3)	Identified in a screen for mutants resistant to an anti-auxin. Encodes a protein with unknown function that shares homology with DCN protein family.	similar to unknown protein [Arabidopsis thaliana] (TAIR:AT3G12760.1); similar to unnamed protein product [Vitis vinifera] (GB:CAO14997.1); contains InterPro domain Protein of unknown function DUF298 (InterPro:IPR005176); contains InterPro domain Defective	0	0	#DIV/0!	0	2	0	0	2	0	0.993007	0.902752
AT3G29270	protein_coding	ubiquitin-protein ligase		similar to zinc finger (C3HC4-type RING finger) family protein [Arabidopsis thaliana] (TAIR:AT1G69330.1); similar to unnamed protein product [Vitis vinifera] (GB:CAO15044.1); contains InterPro domain Zinc finger, RING/FYVE/PHD-type (InterPro:IPR013083); c	0	0	#DIV/0!	0	1	0	0	1	0	0.958355	0.776397
AT3G29390	protein_coding	RIK (RS2-INTERACTING KH PROTEIN)	Nuclear localized K-homology containing protein that interacts with AS1.	Identical to Protein RIK (RIK) [Arabidopsis Thaliana] (GB:Q9LIA4;GB:Q32SG0;GB:Q8VZ97); similar to unnamed protein product [Vitis vinifera] (GB:CAO49176.1); contains InterPro domain K Homology, type 1; (InterPro:IPR004088)	0	0	#DIV/0!	0	1	0	0	1	0	0.917561	0.350579
AT3G29575	protein_coding			similar to TMAC2 (TWO OR MORE ABRES-CONTAINING GENE 2) [Arabidopsis thaliana] (TAIR:AT3G02140.1); similar to unnamed protein product [Vitis vinifera] (GB:CAO49169.1); contains InterPro domain Protein of unknown function DUF1675 (InterPro:IPR012463)	0	3	0	0	0	#DIV/0!	0	3	0	0.709562	0.113653
AT3G29670	protein_coding	transferase family protein		similar to transferase family protein [Arabidopsis thaliana] (TAIR:AT3G29635.1); similar to malonyl-CoA:isoflavone 7-O-glucoside-6''-O-malonyltransferase [Glycine max] (GB:BAF73621.1); contains InterPro domain Transferase (InterPro:IPR003480)	0	1	0	0	0	#DIV/0!	0	1	0	1.39483	0.0511318
AT3G29810	protein_coding	COBL2 (COBRA-LIKE PROTEIN 2 PRECURSOR)		Identical to COBRA-like protein 2 precursor (COBL2) [Arabidopsis Thaliana] (GB:Q8L8Q7;GB:Q9FWK1;GB:Q9LJ49); similar to COBL1 (COBRA-LIKE PROTEIN 1 PRECURSOR) [Arabidopsis thaliana] (TAIR:AT3G02210.1); similar to COB (COBRA) [Arabidopsis thaliana] (TAIR:AT	0	0	#DIV/0!	0	2	0	0	2	0	1.60195	0.0449849
AT3G30770	protein_coding	ATP binding / aminoacyl-tRNA ligase/ nucleotide binding		similar to ATP binding / aminoacyl-tRNA ligase/ aspartic-type endopeptidase/ nucleotide binding [Arabidopsis thaliana] (TAIR:AT3G29750.1); contains InterPro domain Aminoacyl-tRNA synthetase, class II (D, K and N); (InterPro:IPR004364)	0	0	#DIV/0!	0	1	0	0	1	0
AT3G30841	protein_coding	2,3-biphosphoglycerate-independent phosphoglycerate mutase-related / phosphoglyceromutase-related		similar to 2,3-biphosphoglycerate-independent phosphoglycerate mutase family protein / phosphoglyceromutase family protein [Arabidopsis thaliana] (TAIR:AT4G09520.1); similar to hypothetical protein OsI_037340 [Oryza sativa (indica cultivar-group)] (GB:EAY	0	0	#DIV/0!	0	1	0	0	1	0
AT3G36659	protein_coding	invertase/pectin methylesterase inhibitor family protein		similar to invertase/pectin methylesterase inhibitor family protein [Arabidopsis thaliana] (TAIR:AT1G23350.1); similar to hypothetical protein [Vitis vinifera] (GB:CAN74589.1); contains InterPro domain Pectinesterase inhibitor; (InterPro:IPR006501)	0	0	#DIV/0!	0	1	0	0	1	0
AT3G43240	protein_coding	ARID/BRIGHT DNA-binding domain-containing protein		similar to unnamed protein product [Vitis vinifera] (GB:CAO65176.1); similar to AT-rich interaction region; Zinc finger, FYVE/PHD-type [Medicago truncatula] (GB:ABO84794.1); similar to unnamed protein product [Vitis vinifera] (GB:CAO45555.1); contains Int	0	0	#DIV/0!	0	1	0	0	1	0	1.02486	0.543367
AT3G43610	protein_coding	tubulin binding		similar to SPC98 (SPINDLE POLE BODY COMPONENT 98) [Arabidopsis thaliana] (TAIR:AT5G06680.1); similar to unnamed protein product [Vitis vinifera] (GB:CAO71645.1); contains InterPro domain Spc97/Spc98; (InterPro:IPR007259)	0	1	0	0	0	#DIV/0!	0	1	0	0.823088	0.0938512
AT3G43720	protein_coding	protease inhibitor/seed storage/lipid transfer protein (LTP) family protein		similar to protease inhibitor/seed storage/lipid transfer protein (LTP) family protein [Arabidopsis thaliana] (TAIR:AT2G27130.1); similar to Os01g0814100 [Oryza sativa (japonica cultivar-group)] (GB:NP_001044604.1); similar to Os05g0489200 [Oryza sativa (	0	1	0	0	1	0	0	2	0	0.403042	0.00615688
AT3G44130	protein_coding	F-box family protein		similar to F-box family protein [Arabidopsis thaliana] (TAIR:AT3G18340.1); similar to hypothetical protein [Vitis vinifera] (GB:CAN80717.1); contains InterPro domain Cyclin-like F-box (InterPro:IPR001810); contains InterPro domain F-box associated type 1	0	0	#DIV/0!	0	1	0	0	1	0
AT3G44320	protein_coding	NIT3 (NITRILASE 3)	Nitrilase (nitrile aminohydrolase ,EC 3.5.5.1) catalyzes the hydrolysis of indole-3-acetonitrile (IAN) to indole-3-acetic acid (IAA). It is the only one of the four Arabidopsis nitrilases whose mRNA levels are strongly induced when plants experience sulp	Identical to Nitrilase 3 (NIT3) [Arabidopsis Thaliana] (GB:P46010;GB:O04909); similar to ATNIT1/NIT1/NITI (NITRILASE 1) [Arabidopsis thaliana] (TAIR:AT3G44310.3); similar to ATNIT1/NIT1/NITI (NITRILASE 1), nitrilase [Arabidopsis thaliana] (TAIR:AT3G44310	0	1	0	0	0	#DIV/0!	0	1	0	0.850125	0.388432
AT3G44330	protein_coding			similar to hypothetical protein OsJ_024705 [Oryza sativa (japonica cultivar-group)] (GB:EAZ41222.1); similar to Os08g0102100 [Oryza sativa (japonica cultivar-group)] (GB:NP_001060766.1); similar to unnamed protein product [Vitis vinifera] (GB:CAO48702.1);	0	0	#DIV/0!	0	1	0	0	1	0	0.970309	0.812007
AT3G44610	protein_coding	protein kinase family protein		similar to protein kinase, putative [Arabidopsis thaliana] (TAIR:AT5G47750.1); similar to hypothetical protein [Vitis vinifera] (GB:CAN83229.1); contains InterPro domain Serine/threonine protein kinase; (InterPro:IPR002290); contains InterPro domain Prote	0	0	#DIV/0!	0	1	0	0	1	0	0.801075	0.0890236
AT3G44680	protein_coding	HDA9 (histone deacetylase 9); histone deacetylase	Class I RPD3 type protein	Identical to Histone deacetylase 9 (HDA9) [Arabidopsis Thaliana] (GB:Q8H0W2;GB:Q9M1N6); similar to HD1 (HISTONE DEACETYLASE19), histone deacetylase [Arabidopsis thaliana] (TAIR:AT4G38130.1); similar to HD1 (HISTONE DEACETYLASE19) [Arabidopsis thaliana] (T	0	0	#DIV/0!	0	1	0	0	1	0	1.1639	0.642477
AT3G44920	protein_coding	ATCHX11 (cation/H+ exchanger 11); monovalent cation:proton antiporter	member of Putative Na+/H+ antiporter family	similar to ATCHX10 (CATION/H+ EXCHANGER 10), monovalent cation:proton antiporter [Arabidopsis thaliana] (TAIR:AT3G44930.1); similar to ATCHX12 (cation/H+ exchanger 12), monovalent cation:proton antiporter [Arabidopsis thaliana] (TAIR:AT3G44910.1); similar	0	1	0	0	0	#DIV/0!	0	1	0
AT3G45140	protein_coding	LOX2 (LIPOXYGENASE 2)	Chloroplast lipoxygenase required for wound-induced jasmonic acid accumulation in Arabidopsis.Mutants are resistant to Staphylococcus aureus and accumulate salicylic acid upon infection.	Identical to Lipoxygenase, chloroplast precursor (LOX2) [Arabidopsis Thaliana] (GB:P38418;GB:Q8W4E4;GB:Q9M1U5); similar to lipoxygenase family protein [Arabidopsis thaliana] (TAIR:AT1G67560.1); similar to lipoxygenase, putative [Arabidopsis thaliana] (TA	0	1	0	0	0	#DIV/0!	0	1	0	0.698392	0.389609
AT3G45770	protein_coding	oxidoreductase, zinc-binding dehydrogenase family protein		Identical to Probable trans-2-enoyl-CoA reductase, mitochondrial precursor [Arabidopsis Thaliana] (GB:Q8LCU7;GB:Q8W4H6;GB:Q9M166); similar to ARP protein (REF) [Arabidopsis thaliana] (TAIR:AT1G49670.1); similar to unnamed protein product [Vitis vinifera]	0	1	0	0	1	0	0	2	0	1.32069	0.297197
AT3G46450	protein_coding	SEC14 cytosolic factor family protein / phosphoglyceride transfer family protein		similar to SEC14 cytosolic factor, putative / phosphoglyceride transfer protein, putative [Arabidopsis thaliana] (TAIR:AT2G21540.2); similar to SEC14 cytosolic factor, putative / phosphoglyceride transfer protein, putative [Arabidopsis thaliana] (TAIR:AT2	0	0	#DIV/0!	0	2	0	0	2	0	1.012	0.911581
AT3G46490	protein_coding	oxidoreductase, acting on paired donors, with incorporation or reduction of molecular oxygen, 2-oxoglutarate as one donor, and incorporation of one atom each of oxygen into both donors		similar to oxidoreductase, 2OG-Fe(II) oxygenase family protein [Arabidopsis thaliana] (TAIR:AT1G35190.1); similar to unnamed protein product [Vitis vinifera] (GB:CAO65454.1); contains InterPro domain 2OG-Fe(II) oxygenase (InterPro:IPR005123); contains Int	0	1	0	0	0	#DIV/0!	0	1	0	1.13296	0.385501
AT3G46530	protein_coding	RPP13 (RECOGNITION OF PERONOSPORA PARASITICA 13); ATP binding	Confers resistance to the biotrophic oomycete, Peronospora parasitica. Encodes an NBS-LRR type R protein with a putative amino-terminal leucine zipper. Fungal protein ATR13 induces RPP13 gene expression and disease resistance.	Identical to Disease resistance protein RPP13 (RPP13) [Arabidopsis Thaliana] (GB:Q9M667;GB:Q9M668;GB:Q9SNC5); similar to disease resistance protein (CC-NBS-LRR class), putative [Arabidopsis thaliana] (TAIR:AT3G46710.1); similar to disease resistance prot	0	1	0	0	0	#DIV/0!	0	1	0	0.963001	0.887424
AT3G46560	protein_coding	TIM9 (EMBRYO DEFECTIVE 2474); P-P-bond-hydrolysis-driven protein transmembrane transporter	Encodes a small zinc finger-like protein that is a component of the mitochondrial protein import apparatus.	Identical to Mitochondrial import inner membrane translocase subunit Tim9 (TIM9) [Arabidopsis Thaliana] (GB:Q9XGX9;GB:Q8L927;GB:Q9SNC2); similar to unnamed protein product [Vitis vinifera] (GB:CAO15648.1); similar to small zinc finger-like protein [Oryza	0	0	#DIV/0!	0	1	0	0	1	0	0.746604	0.00403469
AT3G46610	protein_coding	pentatricopeptide (PPR) repeat-containing protein		similar to pentatricopeptide (PPR) repeat-containing protein [Arabidopsis thaliana] (TAIR:AT1G09900.1); similar to hypothetical protein OsJ_034385 [Oryza sativa (japonica cultivar-group)] (GB:EAZ20176.1); similar to pentatricopeptide, putative, expressed	0	1	0	0	0	#DIV/0!	0	1	0	0.893979	0.674098
AT3G46840	protein_coding	subtilase family protein		similar to subtilase family protein [Arabidopsis thaliana] (TAIR:AT3G46850.1); similar to ATSBT4.12, subtilase [Arabidopsis thaliana] (TAIR:AT5G59090.1); similar to subtilase family protein [Arabidopsis thaliana] (TAIR:AT5G59100.1); similar to unnamed pro	0	1	0	0	0	#DIV/0!	0	1	0	1.08703	0.493847
AT3G47060	protein_coding	FTSH7 (FtsH protease 7); ATP-dependent peptidase/ ATPase/ metallopeptidase	encodes an FtsH protease that is localized to the chloroplast	similar to FTSH9 (FtsH protease 9), ATP-dependent peptidase/ ATPase/ metallopeptidase [Arabidopsis thaliana] (TAIR:AT5G58870.1); similar to hypothetical protein OsJ_007487 [Oryza sativa (japonica cultivar-group)] (GB:EAZ24004.1); similar to unnamed protei	0	1	0	0	0	#DIV/0!	0	1	0	1.24393	0.391392
AT3G47160	protein_coding	protein binding / zinc ion binding		similar to zinc finger (C3HC4-type RING finger) family protein [Arabidopsis thaliana] (TAIR:AT5G58787.1); similar to Os04g0679800 [Oryza sativa (japonica cultivar-group)] (GB:NP_001054282.1); similar to hypothetical protein [Vitis vinifera] (GB:CAN81290.1	0	0	#DIV/0!	0	2	0	0	2	0	1.10272	0.877316
AT3G47550	protein_coding	zinc finger (C3HC4-type RING finger) family protein		similar to zinc finger (C3HC4-type RING finger) family protein [Arabidopsis thaliana] (TAIR:AT5G62460.1); similar to unnamed protein product [Vitis vinifera] (GB:CAO64548.1); contains InterPro domain Zinc finger, RING/FYVE/PHD-type (InterPro:IPR013083); c	0	1	0	0	0	#DIV/0!	0	1	0	0.938648	0.817463
AT3G47610	protein_coding	transcription regulator/ zinc ion binding		similar to unnamed protein product [Vitis vinifera] (GB:CAO62544.1); contains InterPro domain Zinc finger, C2HC5-type; (InterPro:IPR009349)	0	0	#DIV/0!	0	1	0	0	1	0	1.12303	0.520957
AT3G47620	protein_coding	TCP family transcription factor, putative	Encodes a transcription factor AtTCP14 that regulates seed germination. AtTCP14 shows elevated expression level just prior to germination. AtTCP14 is predominantly expressed in the vascular tissue of the embryo, and affects gene expression in radicles i	similar to TCP family transcription factor, putative [Arabidopsis thaliana] (TAIR:AT1G69690.1); similar to unnamed protein product [Vitis vinifera] (GB:CAO62540.1); contains InterPro domain Transcription factor, TCP (InterPro:IPR005333); contains InterPro	0	2	0	0	0	#DIV/0!	0	2	0	1.51103	0.0797223
AT3G47640	protein_coding	basic helix-loop-helix (bHLH) family protein		similar to basic helix-loop-helix (bHLH) family protein [Arabidopsis thaliana] (TAIR:AT3G19860.1); similar to basic helix-loop-helix (bHLH) family protein [Arabidopsis thaliana] (TAIR:AT3G19860.2); similar to hypothetical protein [Vitis vinifera] (GB:CAN7	0	0	#DIV/0!	0	1	0	0	1	0	0.757748	0.0422304
AT3G47730	protein_coding	ATATH1 (ABC2 homolog 1); ATPase, coupled to transmembrane movement of substances	member of ATH subfamily	Identical to ABC2 homolog 1 (ATH1) [Arabidopsis Thaliana] (GB:Q84K47;GB:Q9STU0); similar to ATATH15 (ABC2 homolog 15), ATPase, coupled to transmembrane movement of substances [Arabidopsis thaliana] (TAIR:AT5G61690.1); similar to ATATH11 (ABC2 homolog 11),	0	0	#DIV/0!	0	2	0	0	2	0	1.58441	0.0289388
AT3G47833	protein_coding			similar to unknown protein [Arabidopsis thaliana] (TAIR:AT5G62575.1); similar to unnamed protein product [Vitis vinifera] (GB:CAO64387.1)	0	1	0	0	0	#DIV/0!	0	1	0	0.867326	0.224383
AT3G47850	protein_coding			similar to hypothetical protein [Vitis vinifera] (GB:CAN75379.1)	0	0	#DIV/0!	0	2	0	0	2	0	0.920295	0.48994
AT3G48000	protein_coding	ALDH2B4 (ALDEHYDE DEHYDROGENASE 2); 3-chloroallyl aldehyde dehydrogenase/ aldehyde dehydrogenase (NAD)	putative (NAD+) aldehyde dehydrogenase (At3g48000) mRNA,	Identical to Aldehyde dehydrogenase 2B4, mitochondrial precursor (ALDH2B4) [Arabidopsis Thaliana] (GB:Q9SU63;GB:Q42090); similar to ALDH2B7 (Aldehyde dehydrogenase 2B7), 3-chloroallyl aldehyde dehydrogenase/ aldehyde dehydrogenase (NAD) [Arabidopsis thal	0	1	0	0	2	0	0	3	0	0.89014	0.12905
AT3G48100	protein_coding	ARR5 (ARABIDOPSIS RESPONSE REGULATOR 5); transcription regulator/ two-component response regulator	Encodes a transcription repressor that mediates a negative feedback loop in cytokinin signalling. ARR5 expression is upregulated by Class I KNOX genes. Arr5 protein is stabilized by cytokinin in a two-component phosphorelay.	Identical to Two-component response regulator ARR5 (ARR5) [Arabidopsis Thaliana] (GB:Q9SB04;GB:O80364;GB:Q9SBH9); similar to ARR6 (RESPONSE REGULATOR 6), transcription regulator/ two-component response regulator [Arabidopsis thaliana] (TAIR:AT5G62920.1);	0	0	#DIV/0!	0	1	0	0	1	0	0.995996	0.987385
AT3G48190	protein_coding	ATM (ATAXIA-TELANGIECTASIA MUTATED)	encodes a homolog of the human ATM gene, which is mutated in ataxia telangiectasia, a chromosome instability disorder. Characterization of mutants suggest a role in repairing DNA in response to ionizing radiation as well as during meiosis. The protein has	Identical to Serine/threonine-protein kinase ATM (ATM) [Arabidopsis Thaliana] (GB:Q9M3G7;GB:Q9M4D7); similar to PWWP domain-containing protein [Arabidopsis thaliana] (TAIR:AT5G40340.1); similar to hypothetical protein OsJ_000051 [Oryza sativa (japonica c	0	3	0	0	0	#DIV/0!	0	3	0	0.867386	0.170042
AT3G48210	protein_coding			similar to unnamed protein product [Vitis vinifera] (GB:CAO64278.1); contains InterPro domain Kinetochore-Ndc80 subunit Spc25 (InterPro:IPR013255)	0	0	#DIV/0!	0	2	0	0	2	0	1.32185	0.514759
AT3G48360	protein_coding	BT2 (BTB AND TAZ DOMAIN PROTEIN 2); protein binding / transcription factor/ transcription regulator	encodes a protein (BT2) that is an essential component of the TAC1-mediated telomerase activation pathway	similar to BT1 (BTB and TAZ domain protein 1), protein binding / transcription regulator [Arabidopsis thaliana] (TAIR:AT5G63160.1); similar to unnamed protein product [Vitis vinifera] (GB:CAO64196.1); contains InterPro domain BTB/POZ fold; (InterPro:IPR01	0	0	#DIV/0!	0	1	0	0	1	0	1.21896	0.343538
AT3G48425	protein_coding	endonuclease/exonuclease/phosphatase family protein		similar to ARP (apurinic endonuclease-redox protein) [Arabidopsis thaliana] (TAIR:AT2G41460.1); similar to unnamed protein product [Vitis vinifera] (GB:CAO64180.1); contains InterPro domain Exodeoxyribonuclease III xth; (InterPro:IPR004808); contains Inte	0	1	0	0	0	#DIV/0!	0	1	0	1.06496	0.789542
AT3G48460	protein_coding	GDSL-motif lipase/hydrolase family protein		similar to lipase, putative [Arabidopsis thaliana] (TAIR:AT1G28650.1); similar to unnamed protein product [Vitis vinifera] (GB:CAO64170.1); contains InterPro domain Lipase, GDSL; (InterPro:IPR001087)	0	0	#DIV/0!	0	1	0	0	1	0	0.515695	0.00654681
AT3G48530	protein_coding	KING1 (SNF1-RELATED PROTEIN KINASE REGULATORY SUBUNIT GAMMA 1)		Identical to SNF1-related protein kinase regulatory subunit gamma 1 (KING1) [Arabidopsis Thaliana] (GB:Q8LBB2;GB:Q9S7W6); similar to CBS domain-containing protein [Arabidopsis thaliana] (TAIR:AT1G69800.2); similar to CBS domain-containing protein [Arabid	0	0	#DIV/0!	0	2	0	0	2	0	0.761456	0.523169
AT3G48570	protein_coding	protein transport protein SEC61 gamma subunit, putative		Identical to Protein transport protein SEC61 gamma-3 subunit (SEC61G3) [Arabidopsis Thaliana] (GB:Q9SMP2); similar to protein transport protein SEC61 gamma subunit, putative [Arabidopsis thaliana] (TAIR:AT4G24920.1); similar to protein transport protein S	0	1	0	0	0	#DIV/0!	0	1	0	1.00703	0.954673
AT3G48580	protein_coding	xyloglucan:xyloglucosyl transferase, putative / xyloglucan endotransglycosylase, putative / endo-xyloglucan transferase, putative		Identical to Probable xyloglucan endotransglucosylase/hydrolase protein 11 precursor (XTH11) [Arabidopsis Thaliana] (GB:Q9SMP1); similar to XTH3 (XYLOGLUCAN ENDOTRANSGLUCOSYLASE/HYDROLASE 3), hydrolase, acting on glycosyl bonds [Arabidopsis thaliana] (TA	0	0	#DIV/0!	0	4	0	0	4	0	1.54456	0.288138
AT3G48680	protein_coding	GAMMA CAL2 (GAMMA CARBONIC ANHYDRASE-LIKE 2); acyltransferase/ transferase	Encodes a mitochondrial gamma carbonic anhydrase-like protein. Component of the NADH dehydrogenase complex.	Identical to Uncharacterized mitochondrial protein At3g48680 [Arabidopsis Thaliana] (GB:Q9SMN1); similar to GAMMA CAL1 (GAMMA CARBONIC ANHYDRASE LIKE 1), carbonate dehydratase [Arabidopsis thaliana] (TAIR:AT5G63510.1); similar to unknown [Populus trichoca	0	1	0	0	0	#DIV/0!	0	1	0	0.956786	0.6787
AT3G48790	protein_coding	serine C-palmitoyltransferase, putative		similar to serine C-palmitoyltransferase, putative [Arabidopsis thaliana] (TAIR:AT3G48780.1); similar to serine palmitpoyltransferase subunit2 [Nicotiana tabacum] (GB:BAE96963.1); contains InterPro domain Aminotransferase, class I and II; (InterPro:IPR004	0	1	0	0	0	#DIV/0!	0	1	0	1.04398	0.488738
AT3G48890	protein_coding	ATMP2 (MEMBRANE STEROID BINDING PROTEIN 2); heme binding / transition metal ion binding	putative progesterone-binding protein homolog (Atmp2) mRNA,	Identical to Putative steroid-binding protein 2 (MP2) [Arabidopsis Thaliana] (GB:Q9M2Z4;GB:Q9XFM5); similar to MSBP1 (MEMBRANE STEROID BINDING PROTEIN 1) [Arabidopsis thaliana] (TAIR:AT5G52240.1); similar to hypothetical protein [Vitis vinifera] (GB:CAN6	1	1	1	1	0	#DIV/0!	0	1	0	1.04855	0.582119
AT3G48920	protein_coding	AtMYB45 (myb domain protein 45); DNA binding / transcription factor	Member of the R2R3 factor gene family.	similar to AtMYB18 (myb domain protein 18), DNA binding / transcription factor [Arabidopsis thaliana] (TAIR:AT4G25560.1); similar to MYB transcription factor MYB94 [Glycine max] (GB:ABH02915.1); contains InterPro domain Myb transcription factor (InterPro:	0	2	0	0	0	#DIV/0!	0	2	0	0.907813	0.774171
AT3G49370	protein_coding	calcium-dependent protein kinase, putative / CDPK, putative		similar to calcium-dependent protein kinase, putative / CDPK, putative [Arabidopsis thaliana] (TAIR:AT5G24430.1); similar to calcium-dependent protein kinase, putative / CDPK, putative [Arabidopsis thaliana] (TAIR:AT2G46700.1); similar to calcium/calmodul	0	0	#DIV/0!	0	1	0	0	1	0	1.07327	0.507825
AT3G49530	protein_coding	ANAC062 (Arabidopsis NAC domain containing protein 62); transcription factor		similar to ANAC091/TIP (TCV-INTERACTING PROTEIN), transcription coactivator/ transcription factor [Arabidopsis thaliana] (TAIR:AT5G24590.2); similar to hypothetical protein [Vitis vinifera] (GB:CAN73792.1); contains InterPro domain No apical meristem (NAM	0	0	#DIV/0!	0	1	0	0	1	0	0.881336	0.671269
AT3G49590	protein_coding			similar to unknown protein [Arabidopsis thaliana] (TAIR:AT3G18770.1); similar to unnamed protein product [Vitis vinifera] (GB:CAO48537.1)	0	1	0	0	0	#DIV/0!	0	1	0	1.08795	0.757679
AT3G49601	protein_coding			similar to unknown protein [Arabidopsis thaliana] (TAIR:AT4G37820.1); similar to unnamed protein product [Vitis vinifera] (GB:CAO43996.1); contains InterPro domain mRNA splicing factor, Cwf21 (InterPro:IPR013170)	0	1	0	0	0	#DIV/0!	0	1	0
AT3G49760	protein_coding	ATBZIP5 (ARABIDOPSIS THALIANA BASIC LEUCINE-ZIPPER 5); DNA binding / transcription factor		similar to ATBZIP6 (ARABIDOPSIS THALIANA BASIC LEUCINE-ZIPPER 6), DNA binding / transcription factor [Arabidopsis thaliana] (TAIR:AT2G22850.1); similar to hypothetical protein [Vitis vinifera] (GB:CAN62264.1); contains InterPro domain Basic-leucine zipper	0	0	#DIV/0!	0	1	0	0	1	0	0.987777	0.776759
AT3G49910	protein_coding	60S ribosomal protein L26 (RPL26A)		Identical to 60S ribosomal protein L26-1 (RPL26A) [Arabidopsis Thaliana] (GB:P51414;GB:Q9M2W7); similar to 60S ribosomal protein L26 (RPL26B) [Arabidopsis thaliana] (TAIR:AT5G67510.1); similar to unknown [Populus trichocarpa] (GB:ABK93553.1); contains Int	0	1	0	0	0	#DIV/0!	0	1	0	1.15211	0.39033
AT3G50000	protein_coding	CKA2 (casein kinase II alpha chain 2); kinase	casein kinase II catalytic subunit alpha	Identical to Casein kinase II subunit alpha-2 (CKA2) [Arabidopsis Thaliana] (GB:Q08466;GB:Q9SN18); similar to CKA1 (CASEIN KINASE ALPHA 1), kinase [Arabidopsis thaliana] (TAIR:AT5G67380.1); similar to protein kinase CK2 alpha chain [Nicotiana tabacum] (G	0	0	#DIV/0!	0	1	0	0	1	0	0.846797	0.485405
AT3G50620	protein_coding	nodulation protein-related		similar to unknown protein [Arabidopsis thaliana] (TAIR:AT2G15730.1); similar to unnamed protein product [Vitis vinifera] (GB:CAO47777.1); contains domain SSF52540 (SSF52540)	0	0	#DIV/0!	0	1	0	0	1	0	0.571619	0.0588111
AT1G07610	protein_coding	MT1C (metallothionein 1C)	one of the five metallothioneins (MTs) genes identified in Arabidopsis. MTs are cysteine-rich proteins required for heavy metal tolerance.	Identical to Metallothionein-like protein 1C (MT1C) [Arabidopsis Thaliana] (GB:Q38804); contains InterPro domain Plant metallothionein, family 15; (InterPro:IPR000347); contains InterPro domain Mollusc metallothionein, family 2; (InterPro:IPR001008)	25	18	1.38889	0	8	0	26	26	1	0.68907	0.114345
AT3G50830	protein_coding	COR413-PM2 (cold regulated 413 plasma membrane 2)	cold acclimation protein WCOR413-like protein beta form. Transcript is not detectable.	similar to stress-responsive protein, putative [Arabidopsis thaliana] (TAIR:AT4G37220.1); similar to unnamed protein product [Vitis vinifera] (GB:CAO41613.1); contains InterPro domain Cold acclimation WCOR413 (InterPro:IPR008892)	0	0	#DIV/0!	0	1	0	0	1	0	1.09476	0.525327
AT3G51090	protein_coding			similar to unknown protein [Arabidopsis thaliana] (TAIR:AT2G16460.1); similar to unnamed protein product [Vitis vinifera] (GB:CAO48264.1); contains InterPro domain Protein of unknown function DUF1640 (InterPro:IPR012439)	0	1	0	0	0	#DIV/0!	0	1	0	1.01272	0.962107
AT3G51130	protein_coding			Identical to UPF0183 protein At3g51130 [Arabidopsis Thaliana] (GB:Q9SD33;GB:Q53YG9;GB:Q8LD70;GB:Q94C31); similar to unnamed protein product [Vitis vinifera] (GB:CAO48256.1); similar to Os06g0714000 [Oryza sativa (japonica cultivar-group)] (GB:NP_001058570	0	0	#DIV/0!	0	3	0	0	3	0	1.0994	0.027909
AT3G51150	protein_coding	kinesin motor family protein		similar to kinesin motor family protein [Arabidopsis thaliana] (TAIR:AT5G66310.1); similar to hypothetical protein [Thellungiella halophila] (GB:ABB45845.1); similar to hypothetical protein [Vitis vinifera] (GB:CAN75924.1); similar to unnamed protein prod	0	1	0	0	1	0	0	2	0	1.46256	0.0410004
AT3G51260	protein_coding	PAD1 (20S PROTEASOME ALPHA SUBUNIT PAD1); peptidase	20S proteosomal alpha subunits. Interacts with SnRK, SKP1/ASK1 during proteasomal binding of an SCF ubiquitin ligase.	Identical to Proteasome subunit alpha type-7-A (PAD1) [Arabidopsis Thaliana] (GB:P30186;GB:Q41942;GB:Q8LB36); similar to PAD2 (20S proteasome alpha subunit D2), peptidase [Arabidopsis thaliana] (TAIR:AT5G66140.1); similar to proteasome, alpha subunit-lik	0	1	0	0	1	0	0	2	0	0.870503	0.70208
AT3G51300	protein_coding	ARAC11/ATRAC11/ATROP1/ROP1/ROP1AT (RHO-RELATED PROTEIN FROM PLANTS 1); GTP binding / GTPase/ protein binding	Pollen-specific Rop GTPase, member of the Rho family of small GTP binding proteins, interacts with RIC3 and RIC4 to control tip growth in pollen tubes.	Identical to Rac-like GTP-binding protein ARAC11 precursor (ARAC11) [Arabidopsis Thaliana] (GB:P92978); similar to ARAC1/ATGP2/ATRAC1/AtROP3/RAC1/ROP3 (Rho-related protein from plants 3) [Arabidopsis thaliana] (TAIR:AT2G17800.2); similar to ARAC1/ATGP2/A	0	1	0	0	0	#DIV/0!	0	2	0	0.590285	0.15443
AT3G51460	protein_coding	phosphoinositide phosphatase family protein		similar to ATSAC1B/IBS2 (IMPAIRED IN BABA-INDUCED STERILITY 2), phosphoinositide 5-phosphatase [Arabidopsis thaliana] (TAIR:AT5G66020.1); similar to hypothetical protein OsI_034692 [Oryza sativa (indica cultivar-group)] (GB:EAY80733.1); similar to Os11g03	0	0	#DIV/0!	0	1	0	0	1	0	0.946714	0.414729
AT3G51490	protein_coding	TMT3 (TONOPLAST MONOSACCHARIDE TRANSPORTER3); carbohydrate transmembrane transporter/ nucleoside transmembrane transporter/ sugar:hydrogen ion symporter		Identical to Monosaccharide-sensing protein 3 (MSSP3) [Arabidopsis Thaliana] (GB:Q9SD00); similar to TMT2 (TONOPLAST MONOSACCHARIDE TRANSPORTER2), carbohydrate transmembrane transporter/ nucleoside transmembrane transporter/ sugar:hydrogen ion symporter	0	0	#DIV/0!	0	1	0	0	1	0	1.28657	0.0282975
AT3G51500	protein_coding	unknown protein			0	0	#DIV/0!	0	1	0	0	1	0	0.903612	0.291856
AT3G51520	protein_coding	diacylglycerol acyltransferase family		similar to unnamed protein product [Vitis vinifera] (GB:CAO68497.1); contains InterPro domain Diacylglycerol acyltransferase (InterPro:IPR007130)	0	0	#DIV/0!	0	1	0	0	1	0	1.65295	0.00447908
AT3G51540	protein_coding			similar to unknown protein [Arabidopsis thaliana] (TAIR:AT3G08670.1); similar to hypothetical protein [Vitis vinifera] (GB:CAN71240.1)	0	0	#DIV/0!	0	1	0	0	1	0	1.16063	0.0684492
AT3G51630	protein_coding	WNK5 (Arabidopsis WNK kinase 5)	Encodes a member of the WNK family (9 members in all) of protein kinases, the structural design of which is clearly distinct from those of other known protein kinases, such as receptor-like kinases and mitogen-activated protein kinases.	similar to WNK4 (Arabidopsis WNK kinase 4), kinase [Arabidopsis thaliana] (TAIR:AT5G58350.1); similar to unnamed protein product [Vitis vinifera] (GB:CAO21320.1); contains InterPro domain Protein kinase, core; (InterPro:IPR000719); contains InterPro domai	0	0	#DIV/0!	0	1	0	0	1	0	1.06517	0.39163
AT3G52260	protein_coding	pseudouridine synthase family protein		similar to unnamed protein product [Vitis vinifera] (GB:CAO68978.1); contains InterPro domain RNA-binding S4; (InterPro:IPR002942); contains InterPro domain Pseudouridine synthase; (InterPro:IPR006145)	0	0	#DIV/0!	0	1	0	0	1	0	1.22264	0.235539
AT3G52580	protein_coding	40S ribosomal protein S14 (RPS14C)		Identical to 40S ribosomal protein S14-3 (RPS14C) [Arabidopsis Thaliana] (GB:P42036;GB:Q9SVD9); similar to 40S ribosomal protein S14 (RPS14B) [Arabidopsis thaliana] (TAIR:AT3G11510.1); similar to cytoplasmic ribosomal protein S14 [Brassica napus] (GB:AAO4	0	1	0	0	0	#DIV/0!	0	1	0	1.04385	0.738266
AT3G52610	protein_coding			similar to hypothetical protein [Vitis vinifera] (GB:CAN71367.1); contains domain CoA-dependent acyltransferases (SSF52777)	0	0	#DIV/0!	0	1	0	0	1	0	1.01429	0.800916
AT3G52890	protein_coding	KIPK (KCBP-INTERACTING PROTEIN KINASE); kinase	KCBP-interacting protein kinase interacts specifically with the tail region of KCBP	similar to protein kinase family protein [Arabidopsis thaliana] (TAIR:AT5G03640.1); similar to protein kinase, putative [Arabidopsis thaliana] (TAIR:AT2G36350.1); similar to unnamed protein product [Vitis vinifera] (GB:CAO15937.1); contains InterPro domai	0	0	#DIV/0!	0	1	0	0	1	0	1.02926	0.634998
AT3G53120	protein_coding			similar to unknown protein [Arabidopsis thaliana] (TAIR:AT2G36680.1); similar to unnamed protein product [Vitis vinifera] (GB:CAO62968.1); contains InterPro domain Modifier of rudimentary, Modr (InterPro:IPR009851)	0	3	0	0	0	#DIV/0!	0	3	0
AT3G53500	protein_coding	RSZ32; nucleic acid binding		similar to RSZ33 (ARGININE/SERINE-RICH ZINC KNUCKLE-CONTAINING PROTEIN 33), nucleic acid binding / nucleotide binding / zinc ion binding [Arabidopsis thaliana] (TAIR:AT2G37340.1); similar to RSZ33 (ARGININE/SERINE-RICH ZINC KNUCKLE-CONTAINING PROTEIN 33),	0	0	#DIV/0!	0	1	0	0	1	0	1.03249	0.891484
AT3G53570	protein_coding	AFC1 (ARABIDOPSIS FUS3-COMPLEMENTING GENE 1); kinase	a member of a CDC2-related kinase subfamily, the LAMMER kinases. activates STE12-dependent functions in yeast.	Identical to Serine/threonine-protein kinase AFC1 (AFC1) [Arabidopsis Thaliana] (GB:P51566;GB:Q39184); similar to AFC2 (ARABIDOPSIS FUS3-COMPLEMENTING GENE 1), kinase [Arabidopsis thaliana] (TAIR:AT4G24740.1); similar to putative protein kinase (AME2/AFC	0	2	0	0	0	#DIV/0!	0	2	0	1.12612	0.369981
AT3G53680	protein_coding	PHD finger transcription factor, putative		similar to PHD finger family protein [Arabidopsis thaliana] (TAIR:AT2G37520.1); similar to unnamed protein product [Vitis vinifera] (GB:CAO18035.1); similar to predicted protein [Populus alba x Populus tremula] (GB:AAR14274.1); contains InterPro domain Ac	0	0	#DIV/0!	0	1	0	0	1	0	1.02296	0.867516
AT3G53880	protein_coding	aldo/keto reductase family protein		similar to aldo/keto reductase family protein [Arabidopsis thaliana] (TAIR:AT2G37770.2); similar to unnamed protein product [Vitis vinifera] (GB:CAO15706.1); contains InterPro domain Aldo/keto reductase; (InterPro:IPR001395)	0	0	#DIV/0!	0	1	0	0	1	0	1.05526	0.660234
AT3G54180	protein_coding	CDC2B (CDC2-LIKE GENE); kinase/ protein binding	Arabidopsis homolog of yeast cdc2, a protein kinase (cyclin-dependent kinase) that plays a central role in control of the mitotic cell cycle.	Identical to Cyclin-dependent kinase B1-1 (CDKB1-1) [Arabidopsis Thaliana] (GB:P25859;GB:Q147L4); similar to CDKB1,2 (cyclin-dependent kinase B1,2), kinase [Arabidopsis thaliana] (TAIR:AT2G38620.2); similar to cyclin-dependent kinase B1-1 [Nicotiana taba	0	1	0	0	1	0	0	2	0
AT3G54210	protein_coding	ribosomal protein L17 family protein		Identical to 50S ribosomal protein L17, chloroplast precursor (RPL17) [Arabidopsis Thaliana] (GB:Q9M385;GB:Q8LCR3); similar to ribosomal protein L17 family protein [Arabidopsis thaliana] (TAIR:AT5G09770.1); similar to 50S ribosomal protein L17, chloropla	0	1	0	0	0	#DIV/0!	0	1	0	0.958509	0.873049
AT3G54280	protein_coding	ATP binding / DNA binding / helicase		similar to ATCHR12, ATP binding / DNA binding [Arabidopsis thaliana] (TAIR:AT3G06010.1); similar to putative SNF2 domain-containing protein [Oryza sativa (japonica cultivar-group)] (GB:BAD25208.1); similar to hypothetical protein OsJ_005313 [Oryza sativa	0	0	#DIV/0!	0	1	0	0	1	0	1.07975	0.625651
AT3G54440	protein_coding	glycoside hydrolase family 2 protein		similar to hypothetical protein OsJ_004681 [Oryza sativa (japonica cultivar-group)] (GB:EAZ14856.1); similar to predicted protein [Physcomitrella patens subsp. patens] (GB:EDQ64317.1); similar to unnamed protein product [Vitis vinifera] (GB:CAO42829.1); c	0	1	0	0	0	#DIV/0!	0	1	0
AT3G54560	protein_coding	HTA11; DNA binding	Encodes HTA11, a histone H2A protein.	Identical to Histone H2A variant 1 (H2AV) [Arabidopsis Thaliana] (GB:O23628); similar to HTA8, DNA binding [Arabidopsis thaliana] (TAIR:AT2G38810.2); similar to HTA8, DNA binding [Arabidopsis thaliana] (TAIR:AT2G38810.1); similar to HTA8, DNA binding [Ar	0	1	0	0	0	#DIV/0!	0	1	0	1.03869	0.921447
AT3G54640	protein_coding	TSA1 (TRYPTOPHAN SYNTHASE ALPHA CHAIN); tryptophan synthase	Catalyzes the conversion of indole-3-glycerolphosphate to indole, the penultimate reaction in the biosynthesis of tryptophan. Functions as a heterocomplex with tryptophan synthase beta subunit (TSA2).	similar to tryptophan synthase, alpha subunit, putative [Arabidopsis thaliana] (TAIR:AT4G02610.1); similar to tryptophan synthase, alpha subunit (TSA1) [Isatis tinctoria] (GB:CAH56477.1); contains InterPro domain Ribulose-phosphate binding barrel; (InterP	0	0	#DIV/0!	0	2	0	0	2	0	1.04857	0.669201
AT3G54750	protein_coding			similar to unnamed protein product [Vitis vinifera] (GB:CAO48944.1); contains domain PTHR12972 (PTHR12972)	0	0	#DIV/0!	0	1	0	0	1	0	1.02511	0.927817
AT3G54790	protein_coding	armadillo/beta-catenin repeat family protein / U-box domain-containing protein		similar to binding / ubiquitin-protein ligase [Arabidopsis thaliana] (TAIR:AT2G23140.1); similar to unnamed protein product [Vitis vinifera] (GB:CAO40621.1); contains InterPro domain Armadillo-type fold; (InterPro:IPR016024); contains InterPro domain Zinc	0	0	#DIV/0!	0	1	0	0	1	0	1.03439	0.805194
AT3G54820	protein_coding	PIP2;5/PIP2D (plasma membrane intrinsic protein 2;5); water channel		Identical to Probable aquaporin PIP2-5 (PIP2-5) [Arabidopsis Thaliana] (GB:Q9SV31); similar to PIP2B (plasma membrane intrinsic protein 2,2), water channel [Arabidopsis thaliana] (TAIR:AT2G37170.1); similar to plasma membrane intrinsic protein 2-2 [Pyrus	0	2	0	0	0	#DIV/0!	0	2	0	0.402286	0.00406357
AT3G54826	protein_coding			similar to Os02g0819700 [Oryza sativa (japonica cultivar-group)] (GB:NP_001048537.1); similar to hypothetical protein OsI_009279 [Oryza sativa (indica cultivar-group)] (GB:EAY88046.1); contains InterPro domain Zinc finger, Zim17-type (InterPro:IPR007853)	0	1	0	0	0	#DIV/0!	0	1	0
AT3G54880	protein_coding			similar to unknown protein [Arabidopsis thaliana] (TAIR:AT5G25360.1); similar to unnamed protein product [Vitis vinifera] (GB:CAO68874.1)	0	1	0	0	0	#DIV/0!	0	1	0
AT3G55030	protein_coding	PGPS2 (phosphatidylglycerolphosphate synthase 2); CDP-alcohol phosphatidyltransferase/ CDP-diacylglycerol-glycerol-3-phosphate 3-phosphatidyltransferase	Encodes a phosphatidylglycerolphosphate synthase.	similar to PGP1/PGPS1/PGS1 (PHOSPHATIDYLGLYCEROLPHOSPHATE SYNTHASE 1), CDP-alcohol phosphatidyltransferase/ CDP-diacylglycerol-glycerol-3-phosphate 3-phosphatidyltransferase [Arabidopsis thaliana] (TAIR:AT2G39290.1); similar to unnamed protein product [Vi	0	0	#DIV/0!	0	2	0	0	2	0	1.18202	0.556281
AT3G55060	protein_coding			similar to unknown protein [Arabidopsis thaliana] (TAIR:AT2G39300.1); similar to unnamed protein product [Vitis vinifera] (GB:CAO41551.1)	0	1	0	0	0	#DIV/0!	0	1	0	1.01938	0.878988
AT3G55070	protein_coding			similar to protein binding / zinc ion binding [Arabidopsis thaliana] (TAIR:AT4G37880.1); similar to unnamed protein product [Vitis vinifera] (GB:CAO41552.1); contains InterPro domain CT11-RanBPM (InterPro:IPR013144); contains InterPro domain LisH dimerisa	0	0	#DIV/0!	0	1	0	0	1	0	1.01475	0.904615
AT3G55120	protein_coding	A11/CFI/TT5 (TRANSPARENT TESTA 5); chalcone isomerase	Catalyzes the conversion of chalcones into flavanones. Required for the accumulation of purple anthocyanins in leaves and stems.	Identical to Chalcone--flavonone isomerase 1 (CHI1) [Arabidopsis Thaliana] (GB:P41088;GB:Q8W532;GB:Q9LE13;GB:Q9LF74;GB:Q9LF75); similar to chalcone isomerase [Arabidopsis thaliana] (TAIR:AT5G66220.1); similar to Chalcone--flavonone isomerase (Chalcone is	0	0	#DIV/0!	0	1	0	0	1	0	0.654891	0.118571
AT3G55290	protein_coding	short-chain dehydrogenase/reductase (SDR) family protein		similar to oxidoreductase [Arabidopsis thaliana] (TAIR:AT3G55310.1); similar to unknown [Populus trichocarpa] (GB:ABK93994.1); contains InterPro domain Glucose/ribitol dehydrogenase; (InterPro:IPR002347); contains InterPro domain Short-chain dehydrogenase	0	2	0	0	2	0	0	4	0
AT3G55310	protein_coding	oxidoreductase		similar to short-chain dehydrogenase/reductase (SDR) family protein [Arabidopsis thaliana] (TAIR:AT3G55290.2); similar to unknown [Populus trichocarpa] (GB:ABK93994.1); contains InterPro domain Glucose/ribitol dehydrogenase; (InterPro:IPR002347); contains	0	1	0	0	0	#DIV/0!	0	1	0	0.13085	5.3047e-05
AT3G55410	protein_coding	2-oxoglutarate dehydrogenase E1 component, putative / oxoglutarate decarboxylase, putative / alpha-ketoglutaric dehydrogenase, putative		similar to 2-oxoglutarate dehydrogenase E1 component, putative / oxoglutarate decarboxylase, putative / alpha-ketoglutaric dehydrogenase, putative [Arabidopsis thaliana] (TAIR:AT5G65750.1); similar to predicted protein [Physcomitrella patens subsp. patens	0	0	#DIV/0!	0	1	0	0	1	0	0.69303	0.140111
AT3G55610	protein_coding	P5CS2 (DELTA 1-PYRROLINE-5-CARBOXYLATE SYNTHASE 2); catalytic/ glutamate 5-kinase/ glutamate-5-semialdehyde dehydrogenase/ oxidoreductase	encodes delta 1-pyrroline-5-carboxylate synthetase B. Gene expression is induced by dehydration, high salt and ABA.	Identical to Delta-1-pyrroline-5-carboxylate synthetase B (P5CSB) [Arabidopsis Thaliana] (GB:P54888;GB:Q9M061); similar to P5CS1 (DELTA1-PYRROLINE-5-CARBOXYLATE SYNTHASE 1) [Arabidopsis thaliana] (TAIR:AT2G39800.1); similar to P5CS1 (DELTA1-PYRROLINE-5-C	0	0	#DIV/0!	0	1	0	0	1	0	0.371184	0.0122462
AT3G55760	protein_coding			similar to unknown protein [Arabidopsis thaliana] (TAIR:AT1G42430.1); similar to hypothetical protein [Trifolium pratense] (GB:BAE71279.1)	0	1	0	0	0	#DIV/0!	0	1	0	0.860694	0.550155
AT3G55800	protein_coding	SBPASE (SEDOHEPTULOSE-BISPHOSPHATASE); phosphoric ester hydrolase/ sedoheptulose-bisphosphatase	Encodes the chloroplast enzyme sedoheptulose-1,7-bisphosphatase (SBPase), involved in the carbon reduction of the Calvin cycle. Increase in SBPase activity in transgenic lines accumulate up to 50% more sucrose and starch than wild-type.	Identical to Sedoheptulose-1,7-bisphosphatase, chloroplast precursor [Arabidopsis Thaliana] (GB:P46283); similar to fructose-1,6-bisphosphatase, putative / D-fructose-1,6-bisphosphate 1-phosphohydrolase, putative / FBPase, putative [Arabidopsis thaliana]	0	0	#DIV/0!	0	1	0	0	1	0	0.990635	0.955719
AT3G55820	protein_coding			similar to Unknown protein [Oryza sativa (japonica cultivar-group)] (GB:AAO06978.1); contains InterPro domain Beta-Ig-H3/fasciclin (InterPro:IPR000782)	0	1	0	0	0	#DIV/0!	0	1	0	1.00564	0.950266
AT3G56010	protein_coding			similar to hypothetical protein [Vitis vinifera] (GB:CAN79918.1); similar to unnamed protein product [Vitis vinifera] (GB:CAO41393.1)	0	0	#DIV/0!	0	2	0	0	2	0	1.17108	0.428278
AT3G56140	protein_coding			similar to unknown protein [Arabidopsis thaliana] (TAIR:AT2G40400.2); similar to unknown protein [Arabidopsis thaliana] (TAIR:AT2G40400.1); similar to hypothetical protein [Vitis vinifera] (GB:CAN64033.1); similar to unnamed protein product [Vitis vinifer	0	1	0	0	0	#DIV/0!	0	1	0	1.15448	0.00756407
AT3G56170	protein_coding	CAN (CA-2+ DEPENDENT NUCLEASE); nuclease	Encodes a calcium-dependent nuclease with similarity to staphylococcal nuclease.	similar to Ca(2+)-dependent nuclease, putative [Arabidopsis thaliana] (TAIR:AT2G40410.2); similar to Ca(2+)-dependent DNase [Populus tomentosa] (GB:AAX21543.1); contains InterPro domain Staphylococcal nuclease (SNase-like), OB-fold; (InterPro:IPR016071);	0	0	#DIV/0!	0	1	0	0	1	0	0.807677	0.280658
AT3G56680	protein_coding	nucleic acid binding		similar to nucleic acid binding [Arabidopsis thaliana] (TAIR:AT2G40960.1); similar to hypothetical protein [Vitis vinifera] (GB:CAN73572.1); contains InterPro domain Single-stranded nucleic acid binding R3H; (InterPro:IPR001374)	0	0	#DIV/0!	0	1	0	0	1	0	0.953221	0.83365
AT3G56740	protein_coding	ubiquitin-associated (UBA)/TS-N domain-containing protein		similar to ubiquitin-associated (UBA)/TS-N domain-containing protein [Arabidopsis thaliana] (TAIR:AT2G41160.1); similar to unnamed protein product [Vitis vinifera] (GB:CAO18203.1); contains InterPro domain Ubiquitin-associated/translation elongation facto	0	0	#DIV/0!	0	1	0	0	1	0	1.02834	0.90031
AT3G56800	protein_coding	CAM3 (CALMODULIN 3); calcium ion binding	encodes a calmodulin	Identical to Calmodulin-2/3/5 (CAM5) [Arabidopsis Thaliana] (GB:P25069); similar to CAM2 (CALMODULIN-2), calcium ion binding [Arabidopsis thaliana] (TAIR:AT2G41110.1); similar to CAM5 (CALMODULIN 5), calcium ion binding [Arabidopsis thaliana] (TAIR:AT2G2	0	1	0	0	0	#DIV/0!	0	1	0	0.825182	0.347583
AT3G56880	protein_coding	VQ motif-containing protein		similar to ATCAMBP25 (ARABIDOPSIS THALIANA CALMODULIN (CAM)-BINDING PROTEIN OF 25 KDA), calmodulin binding [Arabidopsis thaliana] (TAIR:AT2G41010.1); similar to hypothetical protein [Vitis vinifera] (GB:CAN76136.1); contains InterPro domain VQ (InterPro:I	0	0	#DIV/0!	0	1	0	0	1	0	0.237233	0.05365
AT3G57020	protein_coding	strictosidine synthase family protein		similar to strictosidine synthase family protein [Arabidopsis thaliana] (TAIR:AT3G57010.1); similar to unnamed protein product [Vitis vinifera] (GB:CAO63060.1); contains InterPro domain Strictosidine synthase; (InterPro:IPR004141); contains InterPro domai	0	0	#DIV/0!	0	1	0	0	1	0	0.95766	0.687946
AT3G57040	protein_coding	ARR9 (RESPONSE REACTOR 4); transcription regulator	response regulator ARR9, A two-component response regulator-like protein with a receiver domain with a conserved aspartate residue and a possible phosphorylation site and at the N-terminal half. Appears to interact with histidine kinase like genes ATHP3 a	Identical to Two-component response regulator ARR9 (ARR9) [Arabidopsis Thaliana] (GB:O80366); similar to ATRR3 (RESPONSE REGULATOR 3), transcription regulator [Arabidopsis thaliana] (TAIR:AT2G41310.1); similar to unnamed protein product [Vitis vinifera]	0	1	0	0	0	#DIV/0!	0	1	0	1.62717	0.183195
AT3G57050	protein_coding	CBL (CYSTATHIONINE BETA-LYASE)	Encodes second enzyme in the methionine biosynthetic pathway	Identical to Cystathionine beta-lyase, chloroplast precursor [Arabidopsis Thaliana] (GB:P53780;GB:Q8VZL8); similar to MTO1 (METHIONINE OVERACCUMULATION 1) [Arabidopsis thaliana] (TAIR:AT3G01120.1); similar to unnamed protein product [Vitis vinifera] (GB:	0	0	#DIV/0!	0	1	0	0	1	0	0.94459	0.749207
AT3G57290	protein_coding	EIF3E (eukaryotic translation initiation factor 3E)	Encodes a protein that is found in not only the eif3 complex but also in association with subunits of the COP9 signalosome.	similar to predicted protein [Physcomitrella patens subsp. patens] (GB:EDQ70094.1); similar to unknown [Populus trichocarpa] (GB:ABK95989.1); similar to unnamed protein product [Vitis vinifera] (GB:CAO23640.1); contains InterPro domain Eukaryotic translat	0	0	#DIV/0!	0	1	0	0	1	0	0.930866	0.731417
AT3G57800	protein_coding	basic helix-loop-helix (bHLH) family protein		similar to basic helix-loop-helix (bHLH) family protein [Arabidopsis thaliana] (TAIR:AT2G42300.1); similar to unnamed protein product [Vitis vinifera] (GB:CAO23529.1); contains InterPro domain Basic helix-loop-helix dimerisation region bHLH; (InterPro:IPR	0	1	0	0	2	0	0	3	0
AT3G57890	protein_coding	tubulin-specific chaperone C-related		similar to tubulin-specific chaperone C-related [Arabidopsis thaliana] (TAIR:AT2G42230.2); similar to tubulin-specific chaperone C-related [Arabidopsis thaliana] (TAIR:AT2G42230.1); similar to Tubulin binding cofactor C [Medicago truncatula] (GB:ABN08645.	0	1	0	0	0	#DIV/0!	0	1	0	1.10209	0.686226
AT3G57960	protein_coding	emsy N terminus domain-containing protein / ENT domain-containing protein		similar to emsy N terminus domain-containing protein / ENT domain-containing protein [Arabidopsis thaliana] (TAIR:AT3G57970.1); contains InterPro domain ENT (InterPro:IPR005491)	0	1	0	0	0	#DIV/0!	0	1	0	1.11873	0.583197
AT3G58010	protein_coding			Identical to Probable plastid-lipid-associated protein 9, chloroplast precursor (PAP9) [Arabidopsis Thaliana] (GB:Q9M2P7); similar to unknown protein [Arabidopsis thaliana] (TAIR:AT2G42130.4); similar to unknown [Populus trichocarpa] (GB:ABK96151.1)	0	0	#DIV/0!	0	2	0	0	2	0	1.12562	0.204567
AT3G58030	protein_coding	zinc finger (C3HC4-type RING finger) family protein		similar to zinc finger (C3HC4-type RING finger) family protein [Arabidopsis thaliana] (TAIR:AT2G42030.1); similar to unnamed protein product [Vitis vinifera] (GB:CAO23410.1); contains InterPro domain Zinc finger, RING/FYVE/PHD-type (InterPro:IPR013083); c	0	0	#DIV/0!	0	1	0	0	1	0
AT3G58040	protein_coding	seven in absentia (SINA) family protein		Identical to E3 ubiquitin-protein ligase SINAT2 (SINAT2) [Arabidopsis Thaliana] (GB:Q9M2P4;GB:Q0WNH5;GB:Q1ECQ0); similar to seven in absentia (SINA) family protein [Arabidopsis thaliana] (TAIR:AT2G41980.1); similar to SINA2p [Vitis vinifera] (GB:CAB40578	0	1	0	0	0	#DIV/0!	0	1	0	1.4813	0.105475
[truncated: 3,095 more rows]

## Sheet: MMN upregulated genes
Arabidopsis locus	Locus type	Short description	Curator notes	Description	MLN1 hit #	MMN1 hit #	MLN1/MMN1	MLN2 hit #	MMN2 hit #	MLN2/MMN2	All MLN hit #	All MMN hit #	All MLN/All MMN	AtMLN/AtMMN	T-TEST P-value for AtMLN vs AtMMN
[truncated: 72 more rows]

[truncated: 1 more sheets: MLN upregulated genes]
